# Supplementary material for: Genome-wide cooperation by HAT Gcn5, remodeler SWI/SNF, and chaperone Ydj1 in promoter nucleosome eviction and transcriptional activation
Source: HighWire-hosted journal article supplement (doi:10.1101/gr.196337.115), 2015-11-24
Supplement: File_S1.xlsx [file File_S1.xlsx]

## Sheet: 70 genes
Systematic name	Common name	H3-U	H3-I	H3-U/H3-I	Rpb3-U	Rpb3-I	Rpb3-I/Rpb3-U	log2(Rpb3-I)	log2(Rpb3-I/Rpb3-U)	log2(H3-U/H3-I)
YMR251W-A	HOR7	0.351355	0.057515	6.10894	182.297	591.731	3.24598	9.2088	1.69865	2.61092
YNL104C	LEU4	0.636821	0.119635	5.32305	25.395	137.07	5.39752	7.09877	2.4323	2.41225
YPR036W-A	YPR036W-A	0.338228	0.074911	4.51507	286.329	1225.22	4.27905	10.2588	2.09729	2.17475
YPL250C	ICY2	0.63785	0.156232	4.08272	44.0565	530.169	12.0338	9.05031	3.58903	2.02953
YOL058W	ARG1	0.742973	0.188794	3.93536	22.2295	554.593	24.9485	9.11528	4.64088	1.97649
YCL030C	HIS4	0.952517	0.286274	3.32729	24.8586	344.935	13.8759	8.43018	3.79451	1.73435
YBR145W	ADH5	1.05289	0.317974	3.31124	11.9106	147.648	12.3963	7.20602	3.63184	1.72737
YOR130C	ORT1	1.27451	0.421851	3.02124	12.8572	50.7743	3.94908	5.66603	1.98152	1.59514
YHR018C	ARG4	0.951041	0.360557	2.6377	38.5199	582.275	15.1162	9.18556	3.91803	1.39928
YOL119C	MCH4	1.18276	0.449968	2.62854	10.0832	100.16	9.93338	6.64617	3.31229	1.39426
YDR380W	ARO10	0.878147	0.352115	2.49392	19.4614	118.055	6.06609	6.88331	2.60077	1.31841
YGL117W	YGL117W	1.04504	0.429063	2.43562	27.5074	205.407	7.46731	7.68234	2.90059	1.28429
YJL088W	ARG3	0.440281	0.182799	2.40855	12.29	367.468	29.8998	8.52148	4.90206	1.26816
YGR161C	RTS3	0.517818	0.21772	2.37836	14.0149	70.4884	5.02954	6.13931	2.33043	1.24997
YER052C	HOM3	0.70626	0.298351	2.36721	22.7478	164.341	7.22449	7.36055	2.8529	1.24319
YIL051C	MMF1	0.773678	0.330911	2.33802	83.9686	186.542	2.22157	7.54335	1.15158	1.22529
YER069W	ARG5,6	0.692556	0.301915	2.29388	15.7712	248.049	15.728	7.95448	3.97526	1.19779
YHR022C	YHR022C	0.851535	0.386717	2.20196	14.7379	46.3921	3.14782	5.53581	1.65435	1.13879
YDR127W	ARO1	0.925387	0.424035	2.18234	20.729	58.8663	2.83981	5.87937	1.50579	1.12587
YDL182W	LYS20	0.509521	0.238126	2.13971	33.8397	141.922	4.19395	7.14895	2.06831	1.09741
YDL131W	LYS21	0.527599	0.255831	2.06229	24.329	76.7419	3.15434	6.26194	1.65734	1.04425
YDR354W	TRP4	0.86926	0.424942	2.0456	14.999	59.3932	3.95981	5.89223	1.98543	1.03252
YIL116W	HIS5	0.780858	0.386975	2.01785	23.6527	239.192	10.1126	7.90202	3.33809	1.01282
YER055C	HIS1	0.564525	0.281287	2.00694	40.8129	152.627	3.73967	7.25386	1.90291	1.005
YOR303W	CPA1	0.558719	0.281351	1.98585	35.2306	240.982	6.84014	7.91278	2.77403	0.989753
YLR120C	YPS1	1.01997	0.515041	1.98037	25.1688	57.6151	2.28914	5.84837	1.19481	0.985768
YNL125C	ESBP6	0.815081	0.412527	1.97583	13.5788	42.8247	3.15378	5.42037	1.65708	0.982457
YMR062C	ARG7	1.2115	0.618704	1.95812	13.9592	200.168	14.3395	7.64507	3.84192	0.969468
YBR249C	ARO4	0.627633	0.331298	1.89447	29.0517	92.0736	3.1693	6.52472	1.66416	0.921794
YGL032C	AGA2	0.603661	0.32553	1.8544	45.9626	235.528	5.12434	7.87976	2.35737	0.89095
YHR162W	MPC2	0.692554	0.375085	1.84639	76.0119	346.271	4.55549	8.43576	2.18761	0.884707
YCR005C	CIT2	0.586524	0.324598	1.80693	84.1157	219.124	2.60503	7.7756	1.3813	0.853537
YPL264C	YPL264C	0.849899	0.476998	1.78177	14.7915	54.2887	3.67027	5.76258	1.87589	0.833308
YOR337W	TEA1	0.51709	0.290545	1.77972	10.5764	30.4709	2.88102	4.92936	1.52658	0.831653
YKL211C	TRP3	1.04506	0.590803	1.76888	19.6763	80.2439	4.07821	6.32632	2.02794	0.822837
YLR258W	GSY2	1.00763	0.570507	1.76621	30.9979	65.5981	2.11621	6.03558	1.08148	0.820653
YBR248C	HIS7	0.845242	0.479818	1.76159	20.1397	68.728	3.41256	6.10283	1.77085	0.816879
YIL015W	BAR1	0.636174	0.361402	1.76029	79.0387	172.781	2.18603	7.4328	1.12832	0.815816
YGL184C	STR3	0.572033	0.327819	1.74497	7.19569	127.179	17.6743	6.99072	4.14358	0.803201
YPL135W	ISU1	0.727203	0.419555	1.73327	54.4166	181.715	3.33932	7.50553	1.73956	0.793498
YFL026W	STE2	0.377084	0.218179	1.72832	193.169	379.666	1.96546	8.56859	0.974865	0.789372
YOL084W	PHM7	1.01641	0.605239	1.67936	16.0852	41.9224	2.60627	5.38965	1.38199	0.747908
YJR109C	CPA2	0.632834	0.380434	1.66345	20.3321	328.827	16.1728	8.36118	4.01549	0.734182
YOR230W	WTM1	0.730551	0.44158	1.6544	27.4168	63.32	2.30953	5.98459	1.2076	0.726312
YDR379C-A	SDH6	0.969624	0.586216	1.65404	21.2893	50.6427	2.37879	5.66228	1.25023	0.725992
YOR221C	MCT1	1.12736	0.685588	1.64437	11.3911	39.5409	3.47122	5.30527	1.79544	0.717532
YFL014W	HSP12	0.434605	0.266616	1.63007	98.7664	247.727	2.50821	7.95261	1.32666	0.704938
YER053C	PIC2	0.914523	0.570618	1.60269	27.0822	84.4557	3.1185	6.40012	1.64085	0.680493
YER175C	TMT1	0.755892	0.473955	1.59486	16.1812	190.493	11.7725	7.57359	3.55734	0.673429
YNR069C	BSC5	0.987344	0.621509	1.58862	10.0576	36.8345	3.66235	5.20299	1.87277	0.667777
YDR043C	NRG1	0.30091	0.191004	1.57541	50.9796	109.86	2.15498	6.77953	1.10768	0.65573
YOL052C-A	DDR2	0.532094	0.341725	1.55709	53.8067	136.703	2.54063	7.0949	1.34519	0.638848
YNR044W	AGA1	0.924404	0.596438	1.54988	27.4632	102.641	3.73741	6.68146	1.90204	0.632152
YJR148W	BAT2	0.642508	0.417125	1.54032	11.8984	30.5963	2.57146	4.93528	1.36259	0.623234
YLR452C	SST2	0.653187	0.425292	1.53585	45.4087	114.634	2.5245	6.84089	1.336	0.619041
YGL202W	ARO8	0.593927	0.387175	1.534	21.4989	65.4377	3.04377	6.03205	1.60586	0.617299
YLL048C	YBT1	0.815457	0.533715	1.52789	17.6319	39.7526	2.25458	5.31298	1.17286	0.61154
YNL036W	NCE103	0.479931	0.318022	1.50911	49.253	212.556	4.3156	7.7317	2.10956	0.593699
YIL117C	PRM5	0.619215	0.410425	1.50872	15.4725	63.4732	4.10232	5.98808	2.03644	0.593322
YGL186C	TPN1	0.961277	0.646707	1.48642	15.0346	32.2093	2.14234	5.00941	1.09919	0.571841
YDL025C	YDL025C	1.27128	0.858507	1.48081	13.5679	50.0975	3.69236	5.64667	1.88454	0.566383
YBR047W	FMP23	1.07232	0.725639	1.47777	8.3055	37.6446	4.53249	5.23437	2.1803	0.563418
YGR088W	CTT1	0.949232	0.643204	1.47579	20.7265	49.998	2.41227	5.6438	1.27039	0.561483
YBR218C	PYC2	0.447208	0.307807	1.45289	19.3846	68.9253	3.55568	6.10696	1.83013	0.538922
YKL035W	UGP1	0.713117	0.491942	1.4496	68.8843	161.298	2.34158	7.33358	1.22748	0.535651
YLR304C	ACO1	0.639576	0.441818	1.4476	38.8707	96.9959	2.49535	6.59985	1.31924	0.533666
YDR531W	YDR531W	0.856435	0.599766	1.42795	13.9604	29.8263	2.13648	4.89851	1.09524	0.513945
YDL198C	GGC1	0.861545	0.605475	1.42292	29.1075	143.812	4.94073	7.16804	2.30472	0.508857
YLL028W	TPO1	0.409633	0.288551	1.41962	30.249	64.9876	2.14842	6.02209	1.10328	0.505509
YJR154W	YJR154W	0.895518	0.632744	1.41529	9.60745	22.3564	2.32698	4.48261	1.21846	0.501101

## Sheet: 211 genes
Systematic name	Common name	H3-U	H3-I	H3-U/H3-I	Rpb3-U	Rpb3-I	Rpb3-I/Rpb3-U	log2(Rpb3-I)	log2(Rpb3-I/Rpb3-U)	log2(H3-U/H3-I)
YMR251W-A	HOR7	0.351355	0.057515	6.10894	182.297	591.731	3.24598	9.2088	1.69865	2.61092
YNL104C	LEU4	0.636821	0.119635	5.32305	25.395	137.07	5.39752	7.09877	2.4323	2.41225
YPR036W-A	YPR036W-A	0.338228	0.074911	4.51507	286.329	1225.22	4.27905	10.2588	2.09729	2.17475
YPL250C	ICY2	0.63785	0.156232	4.08272	44.0565	530.169	12.0338	9.05031	3.58903	2.02953
YOL058W	ARG1	0.742973	0.188794	3.93536	22.2295	554.593	24.9485	9.11528	4.64088	1.97649
YCL030C	HIS4	0.952517	0.286274	3.32729	24.8586	344.935	13.8759	8.43018	3.79451	1.73435
YBR145W	ADH5	1.05289	0.317974	3.31124	11.9106	147.648	12.3963	7.20602	3.63184	1.72737
YOR130C	ORT1	1.27451	0.421851	3.02124	12.8572	50.7743	3.94908	5.66603	1.98152	1.59514
YHR018C	ARG4	0.951041	0.360557	2.6377	38.5199	582.275	15.1162	9.18556	3.91803	1.39928
YOL119C	MCH4	1.18276	0.449968	2.62854	10.0832	100.16	9.93338	6.64617	3.31229	1.39426
YDR380W	ARO10	0.878147	0.352115	2.49392	19.4614	118.055	6.06609	6.88331	2.60077	1.31841
YGL117W	YGL117W	1.04504	0.429063	2.43562	27.5074	205.407	7.46731	7.68234	2.90059	1.28429
YJL088W	ARG3	0.440281	0.182799	2.40855	12.29	367.468	29.8998	8.52148	4.90206	1.26816
YGR161C	RTS3	0.517818	0.21772	2.37836	14.0149	70.4884	5.02954	6.13931	2.33043	1.24997
YER052C	HOM3	0.70626	0.298351	2.36721	22.7478	164.341	7.22449	7.36055	2.8529	1.24319
YIL051C	MMF1	0.773678	0.330911	2.33802	83.9686	186.542	2.22157	7.54335	1.15158	1.22529
YER069W	ARG5,6	0.692556	0.301915	2.29388	15.7712	248.049	15.728	7.95448	3.97526	1.19779
YHR022C	YHR022C	0.851535	0.386717	2.20196	14.7379	46.3921	3.14782	5.53581	1.65435	1.13879
YDR127W	ARO1	0.925387	0.424035	2.18234	20.729	58.8663	2.83981	5.87937	1.50579	1.12587
YDL182W	LYS20	0.509521	0.238126	2.13971	33.8397	141.922	4.19395	7.14895	2.06831	1.09741
YDL131W	LYS21	0.527599	0.255831	2.06229	24.329	76.7419	3.15434	6.26194	1.65734	1.04425
YDR354W	TRP4	0.86926	0.424942	2.0456	14.999	59.3932	3.95981	5.89223	1.98543	1.03252
YIL116W	HIS5	0.780858	0.386975	2.01785	23.6527	239.192	10.1126	7.90202	3.33809	1.01282
YER055C	HIS1	0.564525	0.281287	2.00694	40.8129	152.627	3.73967	7.25386	1.90291	1.005
YOR303W	CPA1	0.558719	0.281351	1.98585	35.2306	240.982	6.84014	7.91278	2.77403	0.989753
YLR120C	YPS1	1.01997	0.515041	1.98037	25.1688	57.6151	2.28914	5.84837	1.19481	0.985768
YNL125C	ESBP6	0.815081	0.412527	1.97583	13.5788	42.8247	3.15378	5.42037	1.65708	0.982457
YMR062C	ECM40	1.2115	0.618704	1.95812	13.9592	200.168	14.3395	7.64507	3.84192	0.969468
YBR249C	ARO4	0.627633	0.331298	1.89447	29.0517	92.0736	3.1693	6.52472	1.66416	0.921794
YGL032C	AGA2	0.603661	0.32553	1.8544	45.9626	235.528	5.12434	7.87976	2.35737	0.89095
YHR162W	YHR162W	0.692554	0.375085	1.84639	76.0119	346.271	4.55549	8.43576	2.18761	0.884707
YCR005C	CIT2	0.586524	0.324598	1.80693	84.1157	219.124	2.60503	7.7756	1.3813	0.853537
YPL264C	YPL264C	0.849899	0.476998	1.78177	14.7915	54.2887	3.67027	5.76258	1.87589	0.833308
YOR337W	TEA1	0.51709	0.290545	1.77972	10.5764	30.4709	2.88102	4.92936	1.52658	0.831653
YKL211C	TRP3	1.04506	0.590803	1.76888	19.6763	80.2439	4.07821	6.32632	2.02794	0.822837
YLR258W	GSY2	1.00763	0.570507	1.76621	30.9979	65.5981	2.11621	6.03558	1.08148	0.820653
YBR248C	HIS7	0.845242	0.479818	1.76159	20.1397	68.728	3.41256	6.10283	1.77085	0.816879
YIL015W	BAR1	0.636174	0.361402	1.76029	79.0387	172.781	2.18603	7.4328	1.12832	0.815816
YGL184C	STR3	0.572033	0.327819	1.74497	7.19569	127.179	17.6743	6.99072	4.14358	0.803201
YPL135W	ISU1	0.727203	0.419555	1.73327	54.4166	181.715	3.33932	7.50553	1.73956	0.793498
YFL026W	STE2	0.377084	0.218179	1.72832	193.169	379.666	1.96546	8.56859	0.974865	0.789372
YOL084W	PHM7	1.01641	0.605239	1.67936	16.0852	41.9224	2.60627	5.38965	1.38199	0.747908
YJR109C	CPA2	0.632834	0.380434	1.66345	20.3321	328.827	16.1728	8.36118	4.01549	0.734182
YOR230W	WTM1	0.730551	0.44158	1.6544	27.4168	63.32	2.30953	5.98459	1.2076	0.726312
YDR379C-A	SDH6	0.969624	0.586216	1.65404	21.2893	50.6427	2.37879	5.66228	1.25023	0.725992
YOR221C	MCT1	1.12736	0.685588	1.64437	11.3911	39.5409	3.47122	5.30527	1.79544	0.717532
YOR222W	ODC2	1.12736	0.685588	1.64437	51.2246	122.026	2.38218	6.93105	1.25228	0.717532
YFL014W	HSP12	0.434605	0.266616	1.63007	98.7664	247.727	2.50821	7.95261	1.32666	0.704938
YER053C	PIC2	0.914523	0.570618	1.60269	27.0822	84.4557	3.1185	6.40012	1.64085	0.680493
YER175C	TMT1	0.755892	0.473955	1.59486	16.1812	190.493	11.7725	7.57359	3.55734	0.673429
YNR069C	BSC5	0.987344	0.621509	1.58862	10.0576	36.8345	3.66235	5.20299	1.87277	0.667777
YDR043C	NRG1	0.30091	0.191004	1.57541	50.9796	109.86	2.15498	6.77953	1.10768	0.65573
YOL052C-A	DDR2	0.532094	0.341725	1.55709	53.8067	136.703	2.54063	7.0949	1.34519	0.638848
YNR044W	AGA1	0.924404	0.596438	1.54988	27.4632	102.641	3.73741	6.68146	1.90204	0.632152
YJR148W	BAT2	0.642508	0.417125	1.54032	11.8984	30.5963	2.57146	4.93528	1.36259	0.623234
YLR452C	SST2	0.653187	0.425292	1.53585	45.4087	114.634	2.5245	6.84089	1.336	0.619041
YGL202W	ARO8	0.593927	0.387175	1.534	21.4989	65.4377	3.04377	6.03205	1.60586	0.617299
YLL048C	YBT1	0.815457	0.533715	1.52789	17.6319	39.7526	2.25458	5.31298	1.17286	0.61154
YNL036W	NCE103	0.479931	0.318022	1.50911	49.253	212.556	4.3156	7.7317	2.10956	0.593699
YNL037C	IDH1	0.479931	0.318022	1.50911	22.5045	52.026	2.3118	5.70116	1.20902	0.593699
YIL117C	PRM5	0.619215	0.410425	1.50872	15.4725	63.4732	4.10232	5.98808	2.03644	0.593322
YGL186C	TPN1	0.961277	0.646707	1.48642	15.0346	32.2093	2.14234	5.00941	1.09919	0.571841
YDL025C	YDL025C	1.27128	0.858507	1.48081	13.5679	50.0975	3.69236	5.64667	1.88454	0.566383
YBR046C	ZTA1	1.07232	0.725639	1.47777	10.1659	29.622	2.91386	4.8886	1.54293	0.563418
YBR047W	FMP23	1.07232	0.725639	1.47777	8.3055	37.6446	4.53249	5.23437	2.1803	0.563418
YGR088W	CTT1	0.949232	0.643204	1.47579	20.7265	49.998	2.41227	5.6438	1.27039	0.561483
YBR218C	PYC2	0.447208	0.307807	1.45289	19.3846	68.9253	3.55568	6.10696	1.83013	0.538922
YKL035W	UGP1	0.713117	0.491942	1.4496	68.8843	161.298	2.34158	7.33358	1.22748	0.535651
YLR304C	ACO1	0.639576	0.441818	1.4476	38.8707	96.9959	2.49535	6.59985	1.31924	0.533666
YDR531W	YDR531W	0.856435	0.599766	1.42795	13.9604	29.8263	2.13648	4.89851	1.09524	0.513945
YDL198C	GGC1	0.861545	0.605475	1.42292	29.1075	143.812	4.94073	7.16804	2.30472	0.508857
YLL028W	TPO1	0.409633	0.288551	1.41962	30.249	64.9876	2.14842	6.02209	1.10328	0.505509
YJR154W	YJR154W	0.895518	0.632744	1.41529	9.60745	22.3564	2.32698	4.48261	1.21846	0.501101
YPL092W	SSU1	0.822628	0.585524	1.40495	15.9414	41.9049	2.62869	5.38905	1.39434	0.490514
YOR044W	YOR044W	0.638395	0.462756	1.37955	20.1241	47.2553	2.34819	5.5624	1.23155	0.464198
YDR158W	HOM2	0.69318	0.503416	1.37695	32.6019	122.365	3.75332	6.93505	1.90817	0.46148
YMR120C	ADE17	0.756598	0.549847	1.37601	15.799	45.3486	2.87034	5.50299	1.52122	0.460496
YPR145W	ASN1	0.478991	0.351143	1.36409	34.2257	234.533	6.85254	7.87365	2.77664	0.447939
YLL027W	ISA1	0.49539	0.363424	1.36312	23.5923	58.7599	2.49064	5.87676	1.31652	0.446909
YBL101C	ECM21	0.892641	0.65789	1.35682	14.4373	42.2384	2.92564	5.40048	1.54875	0.440234
YGR043C	YGR043C	0.706786	0.521032	1.35651	9.5506	23.0598	2.41449	4.52731	1.27172	0.439903
YEL071W	DLD3	0.756484	0.559725	1.35153	43.757	118.488	2.70786	6.88859	1.43715	0.434592
YNL311C	SKP2	1.09672	0.81329	1.3485	12.2112	28.2781	2.31575	4.82161	1.21148	0.431357
YBL043W	ECM13	0.450769	0.335028	1.34547	5.0366	35.938	7.13538	5.16744	2.83499	0.428106
YBR147W	YBR147W	0.923783	0.68686	1.34494	5.55369	107.092	19.2831	6.74271	4.26927	0.427538
YOR220W	WSP1	0.923997	0.687124	1.34473	16.1345	40.3616	2.50158	5.33491	1.32284	0.427317
YDL170W	UGA3	0.656297	0.488625	1.34315	10.9138	63.69	5.83574	5.99299	2.54492	0.42562
YJR130C	STR2	0.846905	0.632503	1.33897	12.3902	57.2115	4.61749	5.83823	2.20711	0.421128
YCL027W	FUS1	0.886596	0.666662	1.3299	15.501	51.419	3.31714	5.68423	1.72994	0.411322
YIR017C	MET28	0.804017	0.605846	1.3271	15.7361	85.3738	5.42533	6.41572	2.43971	0.408275
YBL103C	RTG3	0.982743	0.741046	1.32616	14.5381	33.0243	2.27157	5.04546	1.18369	0.40725
YBL102W	SFT2	0.982743	0.741046	1.32616	16.1084	45.217	2.80705	5.49879	1.48906	0.40725
YDR035W	ARO3	0.758662	0.579939	1.30818	19.9196	138.417	6.94879	7.11288	2.79676	0.387557
YJL052W	TDH1	0.882089	0.675791	1.30527	29.0983	69.0528	2.37309	6.10963	1.24677	0.384347
YIL165C	YIL165C	1.05006	0.804748	1.30484	11.0984	39.3011	3.54116	5.2965	1.82422	0.383869
YLR058C	SHM2	0.751292	0.576035	1.30425	54.3583	131.58	2.42061	7.0398	1.27537	0.383218
YCL064C	CHA1	0.745338	0.57415	1.29816	27.7049	120.4	4.34579	6.91169	2.11962	0.376467
YGL125W	MET13	0.492643	0.37955	1.29797	25.7856	98.1398	3.806	6.61677	1.92828	0.376253
YLR290C	YLR290C	0.699078	0.539275	1.29633	10.5961	21.4321	2.02264	4.4217	1.01624	0.374433
YLR152C	YLR152C	1.00789	0.780531	1.29129	11.5463	50.1071	4.33968	5.64694	2.11759	0.368809
YGR065C	VHT1	0.893491	0.692037	1.2911	16.3176	89.7094	5.49771	6.48719	2.45883	0.368603
YMR173W	DDR48	0.629455	0.487569	1.29101	26.0089	86.6811	3.33275	6.43765	1.73671	0.368498
YIR034C	LYS1	1.02236	0.792365	1.29026	13.156	110.897	8.42939	6.79308	3.07543	0.367664
YML116W	ATR1	0.841563	0.660334	1.27445	14.7914	30.214	2.04268	4.91715	1.03046	0.349874
YDR481C	PHO8	1.29707	1.01828	1.27378	16.6905	40.7921	2.44403	5.35022	1.28926	0.349121
YHR071W	PCL5	0.652954	0.512775	1.27337	30.8788	278.757	9.02744	8.12286	3.17432	0.348656
YER090W	TRP2	0.771162	0.609755	1.26471	17.2053	63.0334	3.66361	5.97805	1.87327	0.338803
YKL033W-A	YKL033W-A	0.858287	0.679925	1.26233	17.3971	40.4532	2.32528	5.33818	1.2174	0.336085
YHL021C	FMP12	1.28844	1.0217	1.26107	21.6711	110.282	5.0889	6.78505	2.34735	0.334651
YDR019C	GCV1	0.98876	0.785275	1.25913	22.7221	59.3032	2.60994	5.89004	1.38402	0.332423
YCL009C	ILV6	1.44759	1.15546	1.25283	24.4362	85.8207	3.51203	6.42325	1.8123	0.325188
YDL222C	FMP45	0.904557	0.723981	1.24942	21.3935	63.7705	2.98083	5.99482	1.57572	0.321259
YMR316W	DIA1	1.11161	0.890549	1.24823	11.9242	42.4802	3.5625	5.40872	1.83289	0.319886
YEL063C	CAN1	0.585706	0.470317	1.24534	24.0521	52.7315	2.19239	5.72059	1.1325	0.316541
YER091C	MET6	0.521645	0.419953	1.24215	71.6415	195.341	2.72665	7.60985	1.44713	0.312841
YER024W	YAT2	0.861811	0.695756	1.23867	16.8212	50.9196	3.0271	5.67015	1.59794	0.30879
YGL224C	SDT1	0.761249	0.616908	1.23398	30.6366	74.4346	2.4296	6.2179	1.28072	0.303314
YDL066W	IDP1	1.50497	1.22012	1.23347	20.1856	65.9288	3.26612	6.04284	1.70758	0.302719
YBR256C	RIB5	0.898079	0.729201	1.23159	21.2029	137.557	6.48765	7.10389	2.6977	0.300526
YHR029C	YHI9	0.61994	0.505038	1.22751	11.7693	44.678	3.79615	5.48149	1.92454	0.295736
YGL185C	YGL185C	1.0297	0.83988	1.226	14.116	44.5817	3.15824	5.47838	1.65912	0.293964
YMR189W	GCV2	0.951555	0.778295	1.22261	20.1481	63.2506	3.13928	5.98301	1.65043	0.28997
YKL103C	LAP4	0.669141	0.547613	1.22192	16.2114	39.8429	2.45771	5.31625	1.29732	0.289152
YJL060W	BNA3	0.969019	0.796132	1.21716	13.7395	32.7188	2.38138	5.03205	1.2518	0.283517
YHR137W	ARO9	0.690371	0.56824	1.21493	7.97557	127.366	15.9696	6.99284	3.99725	0.280873
YMR232W	FUS2	0.764783	0.63	1.21394	7.93223	16.6419	2.09801	4.05675	1.06902	0.279699
YOL016C	CMK2	1.12834	0.931841	1.21087	16.1322	38.8764	2.40986	5.28082	1.26895	0.276046
YOR173W	DCS2	1.00499	0.830175	1.21057	15.6618	33.8781	2.1631	5.08228	1.1131	0.275692
YHR030C	SLT2	0.67344	0.556865	1.20934	15.1871	35.1699	2.31577	5.13627	1.21149	0.274223
YLR178C	TFS1	1.15245	0.956981	1.20425	33.4566	68.8874	2.05901	6.10617	1.04195	0.26814
YDR533C	HSP31	0.731552	0.607608	1.20399	22.8994	65.8563	2.8759	6.04125	1.52401	0.267819
YOR136W	IDH2	0.614742	0.51157	1.20168	28.6092	69.8294	2.44081	6.12576	1.28736	0.265048
YGL148W	ARO2	1.24027	1.03439	1.19903	21.9726	43.0748	1.96038	5.42877	0.971136	0.261863
YIL113W	SDP1	0.981865	0.82185	1.1947	9.92194	22.1857	2.23602	4.47156	1.16094	0.256651
YDR461C-A	YDR461C-A	1.15926	0.972549	1.19198	69.8874	164.143	2.34868	7.35881	1.23185	0.253356
YKL128C	PMU1	0.807358	0.682847	1.18234	22.3326	43.7297	1.95811	5.45054	0.969459	0.241645
YBR104W	YMC2	0.747176	0.633875	1.17874	16.2189	36.2676	2.23613	5.18061	1.161	0.237248
YJL200C	ACO2	0.639329	0.544671	1.17379	15.6498	43.9593	2.80893	5.4581	1.49002	0.231172
YDR242W	AMD2	0.822118	0.701642	1.17171	14.0138	37.0744	2.64557	5.21235	1.40358	0.22861
YGL062W	PYC1	0.476556	0.407076	1.17068	19.4956	38.5762	1.97872	5.26964	0.984565	0.227347
YPL269W	KAR9	0.955044	0.81633	1.16992	14.2347	30.5041	2.14294	4.93093	1.09959	0.226415
YJL071W	ARG2	1.08009	0.923754	1.16924	9.96759	25.7008	2.57844	4.68374	1.3665	0.225574
YPL273W	SAM4	0.745187	0.638501	1.16709	21.2625	59.4585	2.7964	5.89381	1.48357	0.222915
YMR250W	GAD1	0.974962	0.835396	1.16707	20.4554	48.2264	2.35763	5.59175	1.23734	0.222886
YOL047C	YOL047C	0.77165	0.661837	1.16592	8.72976	18.2456	2.09004	4.18947	1.06353	0.221472
YNR058W	BIO3	1.21671	1.04504	1.16427	7.12051	18.3167	2.57239	4.19509	1.36311	0.219429
YNR056C	BIO5	1.21671	1.04504	1.16427	7.57698	23.4061	3.08911	4.54881	1.62719	0.219429
YNR057C	BIO4	1.21671	1.04504	1.16427	10.9597	26.789	2.44431	4.74357	1.28943	0.219429
YLR089C	ALT1	0.895326	0.771977	1.15978	15.7925	37.2024	2.35571	5.21733	1.23616	0.213855
YDR011W	SNQ2	0.559122	0.482732	1.15824	20.6527	51.8089	2.50858	5.69513	1.32687	0.21194
YAL028W	FRT2	0.725377	0.627448	1.15608	10.4331	21.1314	2.02541	4.40132	1.01822	0.209236
YGL059W	YGL059W	0.955646	0.82699	1.15557	14.9601	59.1686	3.9551	5.88676	1.98371	0.208605
YFL029C	CAK1	1.02436	0.886728	1.15521	9.36779	20.6474	2.20408	4.36789	1.14018	0.208155
YGR066C	YGR066C	0.888591	0.772933	1.14964	5.74236	14.6752	2.5556	3.8753	1.35366	0.201176
YBR166C	TYR1	0.81087	0.707065	1.14681	15.7722	31.6142	2.00442	4.9825	1.00319	0.197628
YGR019W	UGA1	0.904952	0.789751	1.14587	26.6164	63.8992	2.40074	5.99773	1.26348	0.196444
YER086W	ILV1	0.838124	0.732139	1.14476	21.3758	45.7218	2.13895	5.51481	1.09691	0.195047
YIL164C	NIT1	1.04123	0.910997	1.14296	11.7679	44.1827	3.75452	5.46541	1.90863	0.192776
YBR214W	SDS24	1.17302	1.02649	1.14275	19.039	37.2296	1.95544	5.21838	0.967496	0.192511
YOR184W	SER1	0.540311	0.475934	1.13526	24.0756	70.6724	2.93544	6.14308	1.55358	0.183028
YNL279W	PRM1	0.66031	0.583948	1.13077	12.5038	29.431	2.35375	4.87926	1.23496	0.177304
YDR119W-A	YDR119W-A	0.711134	0.631511	1.12608	12.9868	38.0721	2.9316	5.25066	1.55169	0.171313
YHR047C	AAP1	0.681236	0.607226	1.12188	9.77844	23.6694	2.42057	4.56495	1.27535	0.165923
YFL028C	CAF16	0.802056	0.716831	1.11889	12.9999	38.8404	2.98774	5.27949	1.57905	0.16207
YLR327C	TMA10	1.05529	0.943635	1.11833	22.559	51.9131	2.30122	5.69803	1.2024	0.16134
YIL136W	OM45	1.47379	1.3183	1.11794	19.3975	41.6974	2.14963	5.38189	1.10409	0.160848
YPL188W	POS5	0.738401	0.662443	1.11466	12.2608	29.9255	2.44076	4.9033	1.28733	0.156609
YJR153W	PGU1	0.836692	0.755578	1.10735	7.89193	18.4399	2.33655	4.20476	1.22438	0.147117
YDR425W	SNX41	1.16118	1.04965	1.10625	13.0609	52.3194	4.00581	5.70927	2.00209	0.145682
YLR027C	AAT2	1.05477	0.955666	1.1037	37.7188	98.0939	2.60067	6.61609	1.37888	0.14235
YJR111C	YJR111C	0.945064	0.857357	1.1023	14.4029	57.2287	3.97341	5.83867	1.99038	0.140517
YJL170C	ASG7	0.858754	0.785813	1.09282	18.0215	47.5135	2.63649	5.57027	1.39862	0.128059
YDL054C	MCH1	0.874844	0.803948	1.08819	7.65037	56.6633	7.40661	5.82434	2.88881	0.121924
YNL220W	ADE12	0.736418	0.677089	1.08762	18.4375	42.0542	2.2809	5.39418	1.1896	0.121179
YGL026C	TRP5	0.88151	0.811184	1.0867	19.0361	68.2589	3.58576	6.09295	1.84228	0.119949
YLR267W	BOP2	1.19947	1.10922	1.08137	11.8615	23.6692	1.99547	4.56494	0.996726	0.112854
YDR482C	CWC21	0.966938	0.894544	1.08093	8.98994	23.7483	2.64165	4.56975	1.40144	0.112271
YGR248W	SOL4	0.829624	0.768945	1.07891	11.7772	24.1825	2.05334	4.59589	1.03797	0.109576
YLR211C	YLR211C	0.920211	0.854061	1.07745	6.91301	15.1584	2.19273	3.92205	1.13273	0.107626
YGL181W	GTS1	0.891422	0.82887	1.07547	15.0156	48.0519	3.20013	5.58652	1.67813	0.104963
YJL161W	FMP33	1.00979	0.939115	1.07526	19.2025	38.7537	2.01815	5.27626	1.01304	0.104683
YDR258C	HSP78	0.596642	0.556474	1.07218	21.0645	80.0008	3.79789	6.32194	1.9252	0.10055
YOR100C	CRC1	0.971399	0.90977	1.06774	4.3582	18.8672	4.32913	4.23781	2.11408	0.0945622
YBR035C	PDX3	1.05607	0.990752	1.06593	28.4772	60.1531	2.11232	5.91057	1.07883	0.0921139
YER037W	PHM8	0.472706	0.444991	1.06228	22.744	88.8186	3.90514	6.47279	1.96537	0.0871674
YJL213W	YJL213W	0.613833	0.578803	1.06052	8.41346	89.4472	10.6314	6.48296	3.41026	0.084774
YFR030W	MET10	1.01758	0.965807	1.05361	14.8695	32.1714	2.16359	5.00771	1.11343	0.0753365
YOL140W	ARG8	0.872884	0.830859	1.05058	20.7882	73.8551	3.55275	6.20663	1.82894	0.0711867
YOL064C	MET22	1.09967	1.0489	1.0484	12.7683	48.9845	3.83643	5.61425	1.93976	0.0681885
YJR035W	RAD26	0.51838	0.497185	1.04263	8.27172	23.6695	2.8615	4.56496	1.51677	0.0602267
YFR044C	YFR044C	1.04095	1.00482	1.03596	13.1609	32.5618	2.47413	5.02511	1.30692	0.0509653
YFR045W	YFR045W	1.04095	1.00482	1.03596	12.7769	37.9239	2.96817	5.24504	1.56957	0.0509653
YAL048C	GEM1	0.906416	0.875888	1.03485	10.4942	26.3353	2.5095	4.71893	1.3274	0.049428
YDR487C	RIB3	0.669613	0.648182	1.03306	19.1962	44.0363	2.29401	5.46062	1.19787	0.046929
YKL218C	SRY1	1.0963	1.06167	1.03262	7.9216	48.0807	6.06957	5.58739	2.60159	0.0463114
YGL180W	ATG1	0.687871	0.668065	1.02965	8.81514	41.9434	4.75811	5.39037	2.25039	0.0421492
YNR034W	SOL1	0.71236	0.695417	1.02436	13.3378	29.7212	2.22834	4.89342	1.15597	0.0347272
YIL094C	LYS12	0.73559	0.71828	1.0241	24.2666	54.2802	2.23683	5.76235	1.16145	0.0343564
YBR105C	VID24	0.509353	0.502762	1.01311	15.9401	36.7513	2.30558	5.19972	1.20513	0.0187899
YIL152W	YIL152W	0.843526	0.835626	1.00945	17.6334	34.6466	1.96483	5.11464	0.974406	0.0135738
YNL310C	ZIM17	1.22344	1.21227	1.00921	13.8456	48.5866	3.50918	5.60249	1.81113	0.0132247
YDL223C	HBT1	1.23727	1.23191	1.00435	10.7664	27.7403	2.57655	4.79391	1.36544	0.00626292
YGL025C	PGD1	1.00005	0.999556	1.00049	15.591	48.1815	3.09033	5.59041	1.62776	0.000708831
YGR288W	MAL13	0.969471	0.973581	0.995778	8.08173	16.2105	2.00581	4.01885	1.00419	-0.00610349
YHL036W	MUP3	0.95107	0.955809	0.995041	13.6889	43.658	3.1893	5.44817	1.67324	-0.00717173
YHR096C	HXT5	0.748825	0.758968	0.986636	7.45914	16.6835	2.23665	4.06035	1.16134	-0.0194107
YMR096W	SNZ1	0.825757	0.848342	0.973377	9.87861	99.7893	10.1016	6.64081	3.3365	-0.0389301
YOL091W	SPO21	0.530169	0.549871	0.964171	7.11969	18.441	2.59014	4.20484	1.37303	-0.0526394
YDR236C	FMN1	1.26714	1.36719	0.926821	16.4403	80.168	4.87632	6.32495	2.28579	-0.109638
YJR155W	AAD10	0.892004	0.963856	0.925454	9.22946	20.3377	2.20357	4.34609	1.13984	-0.111766
YER040W	GLN3	0.975714	1.07213	0.910073	13.2779	28.4882	2.14554	4.83229	1.10134	-0.135945

## Sheet: 4744genes
Systematic name	Common name	H3-U	H3-I	H3-U/H3-I	Rpb3-U	Rpb3-I	Rpb3-I/Rpb3-U	log2(Rpb3-I)	log2(Rpb3-I/Rpb3-U)	log2(H3-U/H3-I)
YDR100W	TVP15	0.845328	0.697869	1.2113	20.0426	29.9578	1.4947	4.90486	0.579861	0.276556
YBR016W	YBR016W	1.2024	1.05885	1.13558	23.0952	34.4618	1.49217	5.10693	0.577408	0.183423
YPL089C	RLM1	0.815595	0.557408	1.46319	20.95	31.2608	1.49216	4.96628	0.577403	0.549121
YDL046W	NPC2	0.56876	0.528973	1.07522	37.5551	56.0183	1.49163	5.80783	0.576891	0.104626
YNL144C	YNL144C	0.51429	0.411039	1.25119	17.0119	25.3591	1.49067	4.66443	0.575961	0.323305
YKL086W	SRX1	0.804851	0.830501	0.969115	7.29736	10.8725	1.48992	3.44261	0.575232	-0.0452606
YGL066W	SGF73	0.851245	0.762173	1.11687	15.5039	23.0898	1.48929	4.52919	0.574629	0.159456
YJR078W	BNA2	0.909777	0.976316	0.931846	5.86561	8.7275	1.48791	3.12557	0.573285	-0.101836
YFL030W	AGX1	0.714778	0.701952	1.01827	11.2626	16.7491	1.48714	4.06601	0.572544	0.0261219
YDR421W	ARO80	0.846618	0.769173	1.10069	8.65906	12.8723	1.48657	3.6862	0.571985	0.138402
YNR035C	ARC35	0.855295	0.792447	1.07931	21.8982	32.5524	1.48653	5.02469	0.571947	0.110108
YLR286C	CTS1	0.785555	0.65293	1.20312	124.565	185.103	1.48599	7.53218	0.571429	0.266784
YJL132W	YJL132W	0.57759	0.614293	0.940252	12.1734	18.0844	1.48557	4.17667	0.571014	-0.0888807
YCR104W	PAU3	0.531934	0.509395	1.04425	3.0529	4.52811	1.48321	2.17891	0.568727	0.0624621
YAL026C	DRS2	0.817258	0.885777	0.922645	11.3522	16.8371	1.48316	4.07357	0.56867	-0.116153
YOL117W	RRI2	1.20003	1.06638	1.12533	10.5526	15.6407	1.48217	3.96723	0.56771	0.170343
YHR143W	DSE2	0.58494	0.52198	1.12062	110.249	163.279	1.481	7.3512	0.566575	0.164295
YKR020W	VPS51	1.24102	1.14689	1.08207	12.3925	18.349	1.48065	4.19763	0.56623	0.113791
YJL163C	YJL163C	0.853289	0.785304	1.08657	10.6307	15.7298	1.47966	3.97542	0.565265	0.119783
YOL158C	ENB1	0.535303	0.357696	1.49653	14.7994	21.8941	1.47939	4.45247	0.565005	0.58162
YHR112C	YHR112C	1.33552	1.2097	1.10401	13.7335	20.3049	1.47849	4.34376	0.564129	0.142758
YGR185C	TYS1	1.10628	1.02772	1.07644	34.2847	50.6896	1.47849	5.66362	0.564125	0.10627
YFL018C	LPD1	0.740576	0.604478	1.22515	22.209	32.827	1.4781	5.03681	0.563741	0.292958
YNL194C	YNL194C	0.847161	0.653188	1.29696	8.65164	12.7798	1.47715	3.67579	0.562818	0.375138
YER060W	FCY21	0.767509	0.701972	1.09336	17.9795	26.5575	1.4771	4.73105	0.562765	0.12877
YIL017C	VID28	1.12281	0.960637	1.16882	16.8602	24.8901	1.47626	4.6375	0.561951	0.225056
YEL011W	GLC3	1.23752	1.0647	1.16231	17.6762	26.0707	1.4749	4.70436	0.560621	0.216994
YKR067W	GPT2	1.15807	1.15081	1.00631	15.2986	22.5512	1.47407	4.49513	0.559807	0.00907295
YCR091W	KIN82	1.03205	0.966909	1.06737	9.48966	13.9805	1.47324	3.80535	0.558993	0.0940608
YJR039W	YJR039W	1.39949	1.41437	0.989476	9.06211	13.3502	1.47319	3.73879	0.55894	-0.0152628
YIL087C	YIL087C	1.13354	1.09928	1.03117	15.0089	22.1093	1.47308	4.46658	0.558835	0.0442776
YCR101C	YCR101C	0.81161	0.825143	0.983599	8.94824	13.1793	1.47283	3.7202	0.558595	-0.0238576
YNL134C	YNL134C	0.770514	0.531456	1.44982	34.9118	51.4191	1.47283	5.68423	0.55859	0.535871
YMR253C	YMR253C	0.895896	0.881151	1.01673	12.1236	17.8421	1.47169	4.15721	0.557472	0.0239418
YDR372C	VPS74	0.853551	0.769884	1.10868	20.2227	29.7447	1.47086	4.89456	0.556656	0.148837
YJR137C	ECM17	1.18041	1.00311	1.17675	14.3099	21.047	1.47081	4.39555	0.556607	0.23481
YDR249C	YDR249C	0.926567	0.901997	1.02724	13.2596	19.4899	1.46988	4.28466	0.555694	0.0387731
YPL005W	AEP3	0.858312	0.804112	1.0674	16.4597	24.1919	1.46977	4.59645	0.555587	0.0941069
YGL142C	GPI10	1.13014	1.03999	1.08668	9.97467	14.6516	1.46888	3.87299	0.55472	0.119934
YDL238C	GUD1	1.0797	0.985053	1.09608	11.4788	16.8496	1.46788	4.07464	0.553737	0.132353
YCL039W	GID7	0.682991	0.642491	1.06303	13.0836	19.1876	1.46654	4.2621	0.552414	0.0881891
YDL053C	PBP4	0.680839	0.661067	1.02991	18.1185	26.5617	1.466	4.73128	0.551886	0.0425171
YOL089C	HAL9	1.00202	0.92893	1.07869	11.0385	16.1783	1.46562	4.01598	0.551513	0.109277
YPL270W	MDL2	1.14309	1.09716	1.04186	13.3658	19.5749	1.46455	4.29094	0.550461	0.0591648
YDR353W	TRR1	0.887577	0.780567	1.13709	45.2429	66.2199	1.46365	6.04919	0.549574	0.18535
YBL098W	BNA4	0.630078	0.541925	1.16267	8.80941	12.8912	1.46334	3.68831	0.549269	0.217437
YMR287C	DSS1	1.26262	1.24824	1.01152	11.8566	17.3412	1.46257	4.11613	0.548509	0.0165205
YMR021C	MAC1	1.18843	1.09789	1.08247	16.7707	24.5248	1.46235	4.61617	0.548292	0.114324
YDR452W	PPN1	0.528148	0.538759	0.980304	17.2809	25.2677	1.46218	4.65922	0.548121	-0.0286988
YER078C	YER078C	0.796894	0.624268	1.27653	11.3044	16.5262	1.46193	4.04668	0.547874	0.352222
YDL007C-A	YDL007C-A	1.03773	1.00661	1.03091	2.34581	3.42928	1.46187	1.77791	0.547818	0.0439235
YHR025W	THR1	1.2036	1.13599	1.05952	20.4061	29.8256	1.4616	4.89848	0.54755	0.083411
YDR204W	COQ4	1.0892	1.1392	0.956107	12.7772	18.6728	1.46142	4.22287	0.547369	-0.0647556
YGL116W	CDC20	0.735881	0.558757	1.317	15.9706	23.3297	1.46079	4.5441	0.546746	0.39725
YOR346W	REV1	0.7659	0.741837	1.03244	16.9452	24.6907	1.45709	4.6259	0.543092	0.0460529
YKR080W	MTD1	0.71268	0.602231	1.1834	22.8192	33.2455	1.4569	5.05509	0.542907	0.242939
YPL033C	YPL033C	0.933281	0.885565	1.05388	7.37365	10.7351	1.45588	3.42427	0.541888	0.0757142
YHL020C	OPI1	1.09398	1.12821	0.969656	34.4581	50.1493	1.45537	5.64816	0.541385	-0.0444545
YKL106W	AAT1	1.07153	0.899235	1.1916	18.1445	26.4017	1.45508	4.72256	0.541097	0.252905
YGR112W	SHY1	1.08247	0.970962	1.11484	9.98157	14.5235	1.45503	3.86032	0.541052	0.156841
YPL262W	FUM1	1.12012	0.913145	1.22666	12.0173	17.4773	1.45435	4.12741	0.540371	0.294739
YBR240C	THI2	0.893622	0.814178	1.09758	6.03569	8.77538	1.45391	3.13346	0.539942	0.134321
YBR110W	ALG1	0.832179	0.750404	1.10898	11.0859	16.1123	1.4534	4.01009	0.539432	0.149228
YNL259C	ATX1	0.975851	0.919249	1.06157	23.7949	34.5668	1.4527	5.11131	0.538736	0.0862049
YMR063W	RIM9	1.05987	1.01248	1.04681	14.3254	20.8026	1.45215	4.37869	0.53819	0.0659969
YPL199C	YPL199C	0.594047	0.563835	1.05358	13.9598	20.2615	1.45141	4.34067	0.537456	0.0753053
YOR209C	NPT1	0.950584	0.789363	1.20424	19.6789	28.5548	1.45103	4.83566	0.537082	0.268125
YOL082W	ATG19	0.656236	0.493701	1.32922	16.8027	24.3486	1.44909	4.60577	0.535149	0.410576
YOR080W	DIA2	0.840124	0.780357	1.07659	12.59	18.2412	1.44887	4.18913	0.53493	0.106468
YKL187C	YKL187C	1.21023	1.18694	1.01962	6.03993	8.74785	1.44834	3.12893	0.534397	0.0280352
YMR137C	PSO2	1.19251	1.12081	1.06397	11.714	16.9657	1.44833	4.08455	0.53439	0.0894627
YLR332W	MID2	0.498876	0.386724	1.29001	20.8989	30.2616	1.448	4.91942	0.534066	0.367379
YDR244W	PEX5	0.883546	0.942058	0.937888	14.4871	20.9725	1.44767	4.39043	0.533729	-0.0925121
YEL005C	VAB2	1.11391	1.06438	1.04653	13.5801	19.6586	1.44761	4.29709	0.533674	0.0656125
YMR027W	YMR027W	0.982865	0.940391	1.04517	11.955	17.3043	1.44745	4.11306	0.533514	0.0637337
YML030W	YML030W	0.974723	0.946183	1.03016	18.9356	27.4042	1.44723	4.77632	0.533292	0.0428722
YIL107C	PFK26	0.385639	0.359157	1.07373	10.3894	15.0225	1.44595	3.90905	0.532018	0.102638
YIL095W	PRK1	0.581081	0.595877	0.975168	13.7491	19.8573	1.44427	4.3116	0.530337	-0.0362773
YPR139C	VPS66	0.771998	0.66921	1.1536	17.232	24.8857	1.44415	4.63724	0.530222	0.206138
YKL189W	HYM1	0.780646	0.694333	1.12431	13.9681	20.1675	1.44383	4.33396	0.529897	0.16904
YML004C	GLO1	1.18827	1.12814	1.0533	23.0697	33.3041	1.44363	5.05763	0.529703	0.0749219
YLR251W	SYM1	0.862393	0.717142	1.20254	26.4251	38.1208	1.4426	5.25251	0.528667	0.266087
YFR017C	YFR017C	0.591056	0.511812	1.15483	10.7995	15.5761	1.44229	3.96126	0.528366	0.207683
YPR185W	ATG13	0.876867	0.815766	1.0749	9.84989	14.196	1.44123	3.82741	0.527301	0.104202
YOR273C	TPO4	0.546984	0.46708	1.17107	40.2774	57.9625	1.43908	5.85705	0.525148	0.227831
YPR067W	ISA2	1.00896	0.919362	1.09746	19.591	28.1885	1.43886	4.81704	0.524921	0.134167
YDL168W	SFA1	0.811343	0.743264	1.09159	10.5147	15.1185	1.43784	3.91824	0.523901	0.126436
YER023W	PRO3	1.05155	1.06384	0.988453	21.1058	30.3425	1.43764	4.92327	0.523699	-0.0167557
YOL129W	VPS68	0.869449	0.769433	1.12999	21.374	30.7257	1.43753	4.94138	0.523593	0.176306
YOL027C	MDM38	1.13572	1.03437	1.09798	21.8568	31.4198	1.43753	4.9736	0.523588	0.134853
YER045C	ACA1	0.666925	0.532752	1.25185	6.75977	9.71676	1.43744	3.28048	0.523502	0.32406
YNL018C	YNL018C	0.617122	0.492048	1.25419	8.763	12.5958	1.43739	3.65487	0.523447	0.326757
YPR160W	GPH1	0.840134	0.895546	0.938125	23.1571	33.2682	1.43663	5.05607	0.522692	-0.0921487
YDR163W	CWC15	1.10959	1.06401	1.04284	13.9736	20.0568	1.43533	4.32602	0.521384	0.0605169
YNL117W	MLS1	0.667966	0.593718	1.12506	16.0721	23.0648	1.43508	4.52762	0.521133	0.169996
YDR059C	UBC5	1.09247	0.816455	1.33806	14.3334	20.566	1.43483	4.36219	0.52088	0.420147
YPR021C	AGC1	0.740628	0.652166	1.13564	10.5556	15.1444	1.43473	3.92072	0.520784	0.183511
YGL161C	YIP5	1.1466	0.992051	1.15578	17.8994	25.6749	1.4344	4.68229	0.520449	0.208872
YOR110W	TFC7	0.800401	0.801834	0.998213	11.3733	16.2738	1.43087	4.02448	0.516897	-0.0025806
YBR212W	NGR1	0.959007	0.935702	1.02491	14.2205	20.3274	1.42945	4.34536	0.515459	0.0354929
YLL056C	YLL056C	1.01523	0.94926	1.06949	6.43951	9.20375	1.42926	3.20222	0.51527	0.0969265
YDR358W	GGA1	0.720291	0.664481	1.08399	17.0223	24.3169	1.42853	4.60388	0.51453	0.116352
YCL040W	GLK1	0.575804	0.565976	1.01737	71.4497	102.046	1.42823	6.67308	0.514225	0.0248374
YDL119C	YDL119C	0.88027	0.823169	1.06937	11.9695	17.0929	1.42803	4.09532	0.514028	0.0967576
YIL077C	YIL077C	1.06418	0.96666	1.10089	22.7514	32.4556	1.42653	5.02039	0.512509	0.138664
YDR171W	HSP42	0.883556	0.70509	1.25311	27.964	39.8896	1.42646	5.31794	0.512443	0.325514
YKR097W	PCK1	0.668454	0.672301	0.994277	5.47323	7.80364	1.42578	2.96415	0.511755	-0.00828073
YDL037C	BSC1	0.789367	0.821157	0.961287	3.83744	5.46756	1.42479	2.4509	0.510753	-0.0569609
YKL224C	PAU16	0.698393	0.63257	1.10406	2.27414	3.23951	1.4245	1.69578	0.510453	0.142813
YGL141W	HUL5	1.13014	1.03999	1.08668	12.1236	17.2699	1.42449	4.11019	0.510445	0.119934
YFL041W-A	YFL041W-A	1.40816	1.29771	1.08511	10.717	15.259	1.42382	3.93159	0.509763	0.117839
YNL029C	KTR5	1.36338	1.34756	1.01174	43.7674	62.244	1.42216	5.95986	0.50808	0.0168375
YHR059W	FYV4	1.19835	1.19655	1.00151	13.3431	18.9662	1.42143	4.24536	0.507341	0.00217149
YOL049W	GSH2	0.739609	0.699009	1.05808	15.1318	21.5045	1.42115	4.42657	0.507054	0.0814518
YHR037W	PUT2	1.06843	1.00697	1.06103	16.563	23.5355	1.42097	4.55676	0.506876	0.0854707
YLL026W	HSP104	0.723588	0.636124	1.13749	51.1169	72.6038	1.42035	6.18197	0.506245	0.185859
YMR262W	YMR262W	1.23602	1.12662	1.09711	15.4162	21.8855	1.41964	4.45191	0.505529	0.133711
YDR255C	RMD5	0.797597	0.815906	0.977559	18.4795	26.2128	1.41848	4.7122	0.504346	-0.0327437
YJR036C	HUL4	1.16413	1.17727	0.988838	8.18036	11.6016	1.41823	3.53625	0.504086	-0.0161933
YBR052C	RFS1	0.959888	0.889081	1.07964	19.9604	28.2896	1.41729	4.8222	0.50313	0.110553
YIL066C	RNR3	1.02021	0.929273	1.09786	4.39893	6.2342	1.41721	2.6402	0.50305	0.134696
YIL135C	VHS2	1.05859	0.937004	1.12976	17.1473	24.2806	1.416	4.60173	0.501821	0.176012
YNL130C	CPT1	0.717869	0.804511	0.892304	30.8239	43.6245	1.41528	5.44707	0.501091	-0.164392
YNL138W-A	YSF3	1.20025	1.17211	1.02401	13.8524	19.5898	1.41417	4.29203	0.49996	0.0342318
YMR121C	RPL15B	0.722507	0.513763	1.4063	25.7681	36.4335	1.4139	5.18719	0.49968	0.491909
YOL133W	HRT1	1.09732	1.03719	1.05798	14.117	19.9584	1.41378	4.31892	0.499562	0.0813125
YMR105W-A	YMR105W-A	0.936382	0.70947	1.31983	18.864	26.6394	1.41218	4.73549	0.497926	0.400356
YBR139W	YBR139W	0.837596	0.815129	1.02756	19.8167	27.9757	1.41172	4.8061	0.497456	0.0392265
YOR036W	PEP12	1.01925	0.948006	1.07515	18.2024	25.6933	1.41154	4.68332	0.497269	0.10454
YCR004C	YCP4	0.676296	0.523262	1.29246	19.0432	26.8795	1.4115	4.74843	0.497232	0.370123
YBR217W	ATG12	1.01044	0.995511	1.015	12.4849	17.6209	1.41137	4.13921	0.497098	0.0214778
YLR201C	COQ9	0.830331	0.689494	1.20426	15.6304	22.0546	1.41101	4.46301	0.496727	0.268149
YKL053C-A	MDM35	0.819666	0.696359	1.17707	28.2124	39.764	1.40945	5.31339	0.495136	0.235205
YBR037C	SCO1	0.716995	0.681042	1.05279	14.9217	21.0297	1.40934	4.39436	0.495017	0.0742189
YKR058W	GLG1	0.756622	0.59712	1.26712	19.3896	27.3237	1.4092	4.77208	0.494874	0.341552
YKL129C	MYO3	0.895142	0.774459	1.15583	13.2369	18.6417	1.40832	4.22046	0.49397	0.208927
YMR009W	ADI1	1.28363	1.20861	1.06207	18.9065	26.5569	1.40465	4.73102	0.490206	0.0868843
YMR053C	STB2	1.02902	0.962021	1.06964	10.3025	14.4689	1.4044	3.85489	0.489957	0.0971295
YIL036W	CST6	0.653821	0.565402	1.15638	20.5513	28.8611	1.40434	4.85105	0.489897	0.209618
YOL013W-A	YOL013W-A	1.07377	0.994746	1.07944	12.0096	16.8648	1.40428	4.07594	0.489828	0.110289
YEL059C-A	SOM1	1.52887	1.48706	1.02812	9.01151	12.6545	1.40426	3.66158	0.489809	0.0400049
YDR476C	YDR476C	1.39758	1.26377	1.10588	27.758	38.9687	1.40387	5.28424	0.489412	0.145195
YLR359W	ADE13	0.810611	0.823019	0.984923	19.0458	26.7319	1.40355	4.74049	0.489084	-0.0219166
YML131W	YML131W	0.791942	0.712839	1.11097	6.6361	9.30749	1.40256	3.21839	0.488058	0.151818
YFL021W	GAT1	0.632893	0.500924	1.26345	24.337	34.1152	1.40178	5.09234	0.487263	0.337369
YGL096W	TOS8	0.536353	0.412727	1.29954	21.3873	29.9508	1.4004	4.90452	0.48584	0.377997
YNL277W	MET2	0.733161	0.63297	1.15829	15.1352	21.1897	1.40003	4.40529	0.485454	0.211991
YML016C	PPZ1	0.694997	0.630054	1.10307	20.5553	28.7673	1.39951	4.84636	0.484923	0.14153
YFL054C	YFL054C	0.807716	0.802507	1.00649	7.21744	10.0993	1.39929	3.33618	0.484697	0.00933388
YBR229C	ROT2	0.731059	0.685719	1.06612	14.2613	19.9449	1.39853	4.31795	0.483913	0.0923707
YDR042C	YDR042C	0.837404	0.780658	1.07269	9.90396	13.8499	1.39842	3.7918	0.483795	0.101233
YDR453C	TSA2	1.09773	1.08816	1.00879	18.8581	26.3697	1.39833	4.72081	0.483701	0.012628
YKL124W	SSH4	0.623934	0.591746	1.0544	13.9435	19.4957	1.39819	4.28508	0.483564	0.0764169
YGR206W	YGR206W	0.726885	0.674385	1.07785	23.288	32.5572	1.39803	5.02491	0.483394	0.108156
YGR212W	SLI1	0.773824	0.745005	1.03868	10.0133	13.9974	1.39788	3.80709	0.483241	0.0547556
YMR084W	YMR084W	0.893183	0.779323	1.1461	7.46691	10.436	1.39763	3.38349	0.482982	0.196733
YJR059W	PTK2	1.06161	0.756896	1.40258	25.4064	35.4934	1.39703	5.14948	0.482358	0.488082
YJR065C	ARP3	1.12838	1.08395	1.04099	25.1395	35.0996	1.39619	5.13338	0.4815	0.0579613
YFR006W	YFR006W	0.848945	0.46201	1.8375	12.4623	17.399	1.39613	4.12093	0.481432	0.877747
YCR106W	RDS1	0.929888	0.889797	1.04506	8.01695	11.1856	1.39524	3.48356	0.480511	0.0635812
YDL035C	GPR1	0.799038	0.66026	1.21019	15.2755	21.3113	1.39513	4.41355	0.480397	0.275229
YLR080W	EMP46	0.979423	0.929737	1.05344	9.01332	12.5708	1.39469	3.652	0.479946	0.0751092
YER050C	RSM18	1.1236	1.03103	1.08979	15.0017	20.9151	1.39418	4.38647	0.479416	0.124045
YDR202C	RAV2	1.0892	1.1392	0.956107	12.378	17.2395	1.39276	4.10765	0.477943	-0.0647556
YPL212C	PUS1	0.720901	0.701989	1.02694	19.1325	26.6311	1.39193	4.73504	0.477089	0.0383535
YGR053C	YGR053C	0.91674	0.933845	0.981683	9.10612	12.6707	1.39144	3.66342	0.476582	-0.0266711
YKR065C	PAM17	0.718226	0.704001	1.02021	18.2942	25.4526	1.39129	4.66974	0.476426	0.0288613
YAL027W	YAL027W	1.04331	0.956843	1.09037	12.5717	17.4702	1.38965	4.12683	0.474718	0.124817
YDR032C	PST2	0.924273	0.72761	1.27029	24.2297	33.6643	1.38938	5.07315	0.474445	0.345155
YBR287W	ZSP1	0.805627	0.76715	1.05016	25.2776	35.1016	1.38864	5.13346	0.473675	0.0706039
YJL155C	FBP26	0.630409	0.631416	0.998406	11.8618	16.4669	1.38823	4.0415	0.473242	-0.00230195
YEL062W	NPR2	1.18167	1.1327	1.04323	12.5591	17.4204	1.38707	4.1227	0.472046	0.0610598
YAL013W	DEP1	1.33446	1.30792	1.0203	10.6758	14.7978	1.38611	3.88731	0.471037	0.028988
YBR241C	YBR241C	0.690505	0.542551	1.2727	7.12832	9.86986	1.3846	3.30303	0.469468	0.347893
YHR079C-A	SAE3	0.913361	0.900804	1.01394	4.10477	5.68238	1.38433	2.50649	0.469192	0.0199726
YOR227W	YOR227W	0.985247	0.795231	1.23894	14.5471	20.1316	1.3839	4.33139	0.468736	0.309112
YBL064C	PRX1	0.68947	0.719054	0.958857	17.1057	23.6644	1.38342	4.56465	0.468241	-0.0606122
YCR052W	RSC6	0.912962	0.903798	1.01014	12.4576	17.2327	1.38331	4.10707	0.468124	0.0145552
YDL139C	SCM3	0.981965	0.963846	1.0188	10.1523	14.0435	1.38328	3.81183	0.468098	0.0268683
YPR101W	SNT309	0.742053	0.646779	1.14731	24.5909	34.0081	1.38296	5.08781	0.467756	0.19825
YNL138W	SRV2	0.951022	0.876124	1.08549	19.4777	26.9304	1.38263	4.75117	0.467413	0.118344
YBR151W	APD1	0.584321	0.538611	1.08487	18.5299	25.6148	1.38235	4.67891	0.467128	0.117517
YBL076C	ILS1	0.789887	0.622966	1.26795	38.9074	53.7825	1.38232	5.74907	0.467091	0.342494
YIL071C	PCI8	0.856058	0.858317	0.997368	10.9826	15.1686	1.38115	3.92302	0.465868	-0.0038019
YLR387C	REH1	0.691488	0.620743	1.11397	17.6636	24.3845	1.38049	4.60789	0.465182	0.155708
YLR412C-A	YLR412C-A	0.437356	0.427283	1.02357	5.41988	7.48043	1.38018	2.90312	0.464859	0.0336143
YCR003W	MRPL32	1.00616	0.879413	1.14413	17.6204	24.314	1.37987	4.60372	0.464537	0.19425
YGL085W	YGL085W	0.663737	0.60145	1.10356	13.6255	18.7755	1.37797	4.23078	0.462543	0.142167
YPL166W	ATG29	1.03682	0.981756	1.05609	8.89319	12.2534	1.37784	3.61511	0.462407	0.0787305
YHR126C	YHR126C	0.774678	0.727389	1.06501	3.23409	4.4542	1.37727	2.15517	0.461807	0.0908696
YDR304C	CPR5	0.954407	0.826076	1.15535	19.0303	26.2034	1.37693	4.71168	0.461453	0.208331
YDR486C	VPS60	0.80365	0.805898	0.997211	20.9672	28.84	1.37548	4.85	0.459937	-0.00402916
YDR329C	PEX3	1.36642	1.26533	1.07989	9.76547	13.4314	1.37539	3.74753	0.459845	0.110886
YKL208W	CBT1	0.922729	0.847168	1.08919	9.74695	13.4017	1.37497	3.74435	0.459397	0.12326
YGR130C	YGR130C	1.08162	0.876126	1.23455	31.8493	43.7718	1.37434	5.45193	0.45874	0.303989
YKL034W	TUL1	0.811121	0.657388	1.23385	10.9281	15.017	1.37416	3.90852	0.458547	0.303172
YIL043C	CBR1	1.11019	1.12159	0.989831	19.9262	27.3479	1.37246	4.77336	0.45676	-0.0147456
YAL060W	BDH1	0.931162	0.853513	1.09098	31.8885	43.7247	1.37117	5.45038	0.45541	0.125619
YIL155C	GUT2	1.16403	1.17238	0.992882	15.8123	21.681	1.37115	4.43836	0.455387	-0.0103065
YHR133C	NSG1	0.877207	0.818288	1.072	16.7961	23.0191	1.3705	4.52476	0.454703	0.100309
YPL186C	UIP4	0.835505	0.750692	1.11298	8.56637	11.7249	1.36871	3.5515	0.452821	0.154427
YDR480W	DIG2	1.01592	0.994536	1.0215	15.6301	21.391	1.36858	4.41893	0.452675	0.030686
YBR185C	MBA1	0.991654	0.90814	1.09196	11.1207	15.2063	1.36739	3.9266	0.451426	0.126923
YDL123W	SNA4	0.889507	0.872748	1.0192	39.0512	53.3169	1.36531	5.73652	0.449225	0.0274421
YOR285W	YOR285W	0.892663	0.791488	1.12783	35.3541	48.2655	1.3652	5.59292	0.449112	0.17355
YCL033C	YCL033C	1.43925	1.37242	1.0487	11.301	15.4162	1.36414	3.94638	0.447993	0.0685977
YBR162W-A	YSY6	0.457038	0.427534	1.06901	43.3236	59.0644	1.36333	5.88422	0.447133	0.0962756
YGL156W	AMS1	0.719879	0.607382	1.18522	15.4782	21.0984	1.3631	4.39906	0.446896	0.24515
YPL054W	LEE1	0.728348	0.587741	1.23923	6.73484	9.17969	1.36302	3.19844	0.446802	0.309447
YMR157C	FMP39	1.16247	1.08471	1.07169	13.5478	18.4648	1.36293	4.2067	0.446716	0.0998857
YEL052W	AFG1	1.10839	0.977323	1.1341	13.3158	18.1377	1.36212	4.18092	0.445856	0.181552
YIR036C	YIR036C	1.24552	1.18502	1.05105	9.92614	13.5163	1.36169	3.75663	0.445398	0.071838
YLR093C	NYV1	0.716522	0.642228	1.11568	22.7178	30.9087	1.36055	4.94994	0.444192	0.157924
YOR125C	CAT5	0.899054	0.796897	1.12819	11.1744	15.203	1.36052	3.92629	0.444157	0.174015
YBR059C	AKL1	0.694423	0.600485	1.15644	16.774	22.8128	1.36001	4.51177	0.443618	0.209688
YOR292C	YOR292C	0.687685	0.660183	1.04166	18.4502	25.0897	1.35986	4.64902	0.443457	0.0588834
YGR016W	YGR016W	1.02486	0.87803	1.16723	10.8023	14.6853	1.35947	3.8763	0.443044	0.223088
YDL085W	NDE2	1.19478	1.02827	1.16193	15.3787	20.9021	1.35915	4.38557	0.442709	0.216529
YGL220W	YGL220W	1.20404	1.12037	1.07468	17.3103	23.5258	1.35907	4.55617	0.442616	0.103908
YOR010C	TIR2	1.49362	1.55846	0.958394	5.35506	7.27608	1.35873	2.86316	0.442259	-0.0613093
YAL047C	SPC72	1.24658	1.18539	1.05162	8.29077	11.2545	1.35747	3.49243	0.44092	0.072612
YML058W-A	HUG1	0.509719	0.485067	1.05082	5.45613	7.40457	1.35711	2.88842	0.440537	0.0715164
YJL053W	PEP8	0.779841	0.711815	1.09557	16.2619	22.0683	1.35706	4.4639	0.440484	0.131677
YLR164W	YLR164W	1.01222	0.873829	1.15837	17.1449	23.2604	1.3567	4.5398	0.440099	0.212095
YDR475C	JIP4	1.00553	0.860872	1.16803	20.2814	27.51	1.35642	4.78189	0.439802	0.224081
YKL065C	YET1	0.984816	0.823315	1.19616	34.732	47.1	1.3561	5.55766	0.439462	0.25841
YDR330W	UBX5	1.36642	1.26533	1.07989	12.1248	16.4375	1.35569	4.03892	0.439033	0.110886
YKL192C	ACP1	0.917228	0.942503	0.973184	30.1824	40.9134	1.35554	5.3545	0.438867	-0.0392159
YPL222W	FMP40	1.15928	1.25391	0.924534	23.3883	31.7037	1.35553	4.98658	0.43886	-0.113201
YDL216C	RRI1	0.927537	0.870952	1.06497	10.5058	14.2376	1.35521	3.83163	0.438513	0.0908109
YMR244C-A	YMR244C-A	0.778494	0.849446	0.916473	31.2398	42.3292	1.35498	5.40358	0.43827	-0.125836
YJL068C	YJL068C	1.11457	0.982471	1.13446	13.7751	18.6537	1.35416	4.22139	0.437402	0.182001
YHL034C	SBP1	0.777203	0.68729	1.13082	27.2449	36.8715	1.35333	5.20443	0.436518	0.177372
YOR237W	HES1	0.946098	0.818782	1.1555	4.70078	6.35899	1.35275	2.6688	0.435898	0.208511
YBR128C	ATG14	0.752033	0.706392	1.06461	17.2214	23.2836	1.35202	4.54124	0.435115	0.090328
YHR132W-A	IGO2	1.0053	0.945426	1.06334	20.5262	27.7485	1.35186	4.79434	0.434941	0.0885967
YER029C	SMB1	0.868508	0.871693	0.996346	15.3343	20.7249	1.35153	4.37329	0.434599	-0.00528159
YDR293C	SSD1	0.880955	0.759393	1.16008	25.8758	34.9662	1.35131	5.12789	0.434356	0.214222
YGR067C	YGR067C	1.17044	1.18024	0.991699	4.89524	6.61478	1.35127	2.72569	0.434314	-0.0120254
YHR094C	HXT1	0.67134	0.466692	1.43851	109.412	147.716	1.3501	7.20669	0.433064	0.524574
YKL209C	STE6	0.483298	0.346093	1.39644	48.1845	65.0435	1.34988	6.02333	0.432835	0.481753
YNL076W	MKS1	0.908888	0.749314	1.21296	18.1186	24.4512	1.34951	4.61183	0.432431	0.278533
YMR297W	PRC1	1.08504	0.997664	1.08758	24.5226	33.0857	1.34919	5.04814	0.432097	0.121123
YLR307W	CDA1	0.881778	0.854328	1.03213	4.23287	5.7103	1.34904	2.51357	0.431931	0.045625
YNL097C	PHO23	1.01329	0.934102	1.08478	31.3112	42.2375	1.34896	5.40045	0.431845	0.117397
YGL023C	PIB2	1.49164	1.33143	1.12033	10.5134	14.1776	1.34853	3.82554	0.431383	0.163926
YOL063C	CRT10	0.980194	0.935235	1.04807	13.4213	18.0974	1.3484	4.17771	0.431252	0.0677385
YGR283C	YGR283C	0.845272	0.864256	0.978034	16.8778	22.7528	1.34809	4.50797	0.430914	-0.0320438
YPR017C	DSS4	1.1978	1.14224	1.04864	10.5844	14.268	1.34802	3.83471	0.43084	0.0685173
YBR255C-A	YBR255C-A	0.988454	0.737743	1.33984	25.9527	34.9839	1.34798	5.12862	0.430804	0.422057
YJL020C	BBC1	0.858511	0.833483	1.03003	15.162	20.4344	1.34774	4.35293	0.430538	0.0426834
YDL120W	YFH1	1.07071	0.875537	1.22292	20.8977	28.1543	1.34724	4.81529	0.43001	0.290328
YNL124W	NAF1	1.04808	0.772235	1.3572	11.6389	15.6776	1.347	3.97063	0.429755	0.440633
YMR280C	CAT8	0.713394	0.716055	0.996284	10.0137	13.486	1.34676	3.75339	0.429489	-0.00537166
YDL076C	RXT3	0.416331	0.370503	1.12369	19.1195	25.7331	1.34591	4.68556	0.428582	0.168247
YBR028C	YBR028C	0.508132	0.500563	1.01512	16.0185	21.5484	1.34522	4.42951	0.427846	0.0216509
YBR066C	NRG2	0.457055	0.329839	1.38569	28.3986	38.1997	1.34513	5.25549	0.427741	0.470606
YHR080C	YHR080C	1.02667	0.93138	1.10231	12.087	16.2574	1.34503	4.02302	0.427642	0.140527
YNL103W	MET4	0.846176	0.47736	1.77262	20.8951	28.0991	1.34477	4.81245	0.427358	0.825879
YKL194C	MST1	0.792275	0.739496	1.07137	13.0925	17.5946	1.34387	4.13706	0.426394	0.09946
YKR089C	TGL4	0.43766	0.374098	1.16991	25.8807	34.7591	1.34305	5.11932	0.425516	0.226393
YDR460W	TFB3	1.07641	1.02838	1.04671	31.7088	42.5849	1.343	5.41227	0.425459	0.0658593
YKL025C	PAN3	0.903934	0.90163	1.00256	12.1551	16.3224	1.34284	4.02878	0.42529	0.00368171
YDR254W	CHL4	0.66432	0.714886	0.929267	20.5479	27.5834	1.34239	4.78573	0.424807	-0.105835
YPR098C	YPR098C	0.827202	0.905789	0.913239	19.8468	26.6419	1.34238	4.73562	0.42479	-0.130936
YDR079W	PET100	0.865256	0.838583	1.03181	18.7007	25.0976	1.34207	4.64948	0.424456	0.0451738
YPL018W	CTF19	1.24076	1.21174	1.02395	15.482	20.7645	1.34121	4.37605	0.423531	0.0341456
YBL026W	LSM2	0.921842	0.859223	1.07288	20.5391	27.5375	1.34073	4.78332	0.42302	0.101487
YCL029C	BIK1	1.52832	1.40108	1.09082	17.3258	23.2201	1.34021	4.5373	0.422456	0.125409
YNR074C	AIF1	0.901486	0.802323	1.12359	10.5952	14.189	1.33919	3.8267	0.421362	0.168122
YEL039C	CYC7	0.877653	0.88101	0.99619	43.0446	57.6442	1.33917	5.8491	0.421342	-0.00550764
YER044C	ERG28	0.703286	0.665692	1.05647	24.3202	32.5662	1.33906	5.02531	0.421222	0.0792561
YLR054C	OSW2	0.663834	0.683202	0.971651	8.00001	10.7101	1.33876	3.4209	0.4209	-0.0414902
YMR092C	AIP1	0.926047	0.790498	1.17147	16.5296	22.1215	1.33829	4.46737	0.420395	0.228324
YPL223C	GRE1	1.15928	1.25391	0.924534	8.04028	10.7517	1.33723	3.4265	0.419252	-0.113201
YJL078C	PRY3	0.442522	0.378916	1.16786	32.5634	43.544	1.3372	5.4444	0.41922	0.223869
YLR285W	NNT1	1.12255	1.08285	1.03666	25.4993	34.0722	1.3362	5.09052	0.418137	0.0519429
YPR115W	YPR115W	0.865919	0.654793	1.32243	17.903	23.92	1.33609	4.58015	0.418016	0.403193
YPL003W	ULA1	0.764777	0.657625	1.16294	20.9831	28.0326	1.33596	4.80904	0.417876	0.217774
YKL162C	YKL162C	0.813649	0.698522	1.16481	6.42286	8.57729	1.33543	3.10052	0.417305	0.2201
YDR283C	GCN2	0.698012	0.625888	1.11523	11.744	15.6828	1.3354	3.97112	0.417268	0.157346
YJR082C	EAF6	0.883298	0.936879	0.942809	16.2485	21.6875	1.33474	4.43879	0.416553	-0.0849633
YER124C	DSE1	0.678427	0.592365	1.14528	90.5027	120.775	1.33449	6.91618	0.416294	0.195706
YKL072W	STB6	0.660783	0.629465	1.04975	8.37043	11.1686	1.33429	3.48138	0.416078	0.0700517
YNL177C	MRPL22	0.745231	0.735262	1.01356	20.464	27.3007	1.33408	4.77087	0.41585	0.019428
YDL206W	YDL206W	0.726295	0.653042	1.11217	11.169	14.8961	1.3337	3.89686	0.415434	0.153381
YGR122W	YGR122W	0.893388	0.557239	1.60324	14.002	18.6643	1.33297	4.22221	0.414648	0.680989
YMR300C	ADE4	0.864666	0.750311	1.15241	17.63	23.4969	1.33277	4.5544	0.414432	0.204655
YIL072W	HOP1	0.666473	0.542722	1.22802	8.08545	10.7755	1.3327	3.42968	0.414354	0.296331
YJL151C	SNA3	0.818532	0.689211	1.18764	51.8363	69.0723	1.33251	6.11004	0.414146	0.248094
YER150W	SPI1	0.713404	0.63902	1.1164	17.4387	23.2348	1.33237	4.53821	0.413991	0.158859
YKL167C	MRP49	0.738444	0.686151	1.07621	22.7627	30.29	1.33069	4.92077	0.412173	0.105963
YJL160C	YJL160C	0.808525	0.546031	1.48073	19.8847	26.4511	1.33022	4.72525	0.411667	0.56631
YJL094C	KHA1	0.650818	0.664768	0.979016	13.2828	17.6562	1.32925	4.1421	0.410608	-0.0305962
YAR035W	YAT1	0.866948	0.974297	0.889818	3.83625	5.09926	1.32923	2.35029	0.41059	-0.168417
YDR234W	LYS4	0.282456	0.224652	1.25731	15.2738	20.2946	1.32872	4.34302	0.410036	0.330337
YIL016W	SNL1	1.20263	0.94294	1.2754	92.5217	122.756	1.32678	6.93964	0.407925	0.350953
YOL151W	GRE2	0.814675	0.879725	0.926056	14.4893	19.2211	1.32657	4.26462	0.4077	-0.110828
YJR122W	CAF17	0.856375	0.801444	1.06854	22.3071	29.5844	1.32623	4.88676	0.407331	0.0956395
YPL095C	EEB1	0.835072	0.808866	1.0324	20.3535	26.9912	1.32612	4.75442	0.407213	0.0460011
YLR390W	ECM19	1.17879	1.0193	1.15648	29.4105	38.9933	1.32583	5.28516	0.406895	0.209738
YDR516C	EMI2	1.26971	1.1751	1.08052	15.9275	21.113	1.32557	4.40006	0.406612	0.111719
YNL042W	BOP3	1.00778	0.777637	1.29595	17.6712	23.4044	1.32444	4.54871	0.405381	0.374007
YPR100W	MRPL51	0.827202	0.905789	0.913239	24.9913	33.0924	1.32416	5.04843	0.405075	-0.130936
YDR512C	EMI1	1.00471	0.813235	1.23544	27.4156	36.2921	1.32377	5.18158	0.404656	0.305029
YHR202W	YHR202W	0.889322	0.880104	1.01047	9.56046	12.6484	1.32299	3.66088	0.403804	0.0150311
YDR525W-A	SNA2	0.256701	0.188853	1.35927	43.5371	57.5892	1.32276	5.84773	0.403553	0.44283
YNL156C	NSG2	1.00928	0.94753	1.06517	17.3176	22.903	1.32252	4.51746	0.403294	0.0910838
YMR284W	YKU70	0.70155	0.646329	1.08544	8.4958	11.2348	1.3224	3.48991	0.403157	0.118278
YMR258C	YMR258C	0.858353	0.724417	1.18489	17.1664	22.6942	1.32202	4.50425	0.402739	0.244751
YGL191W	COX13	0.932828	0.826748	1.12831	20.9442	27.6751	1.32137	4.79052	0.402036	0.174165
YNL129W	NRK1	0.717869	0.804511	0.892304	17.4411	23.0426	1.32117	4.52623	0.401815	-0.164392
YLR392C	YLR392C	1.31698	1.25515	1.04926	12.0697	15.9439	1.32099	3.99493	0.401615	0.0693722
YGR042W	YGR042W	1.25572	1.08471	1.15766	13.9452	18.403	1.31966	4.20187	0.400168	0.211206
YNR027W	BUD17	1.14968	1.09085	1.05393	8.13678	10.7377	1.31965	3.42461	0.400152	0.0757743
YBR068C	BAP2	0.300106	0.312082	0.961626	108.966	143.792	1.3196	7.16784	0.400097	-0.0564524
YKL007W	CAP1	0.625905	0.581333	1.07667	23.4247	30.8767	1.31813	4.94845	0.398489	0.10658
YLR337C	VRP1	1.03054	1.0026	1.02787	14.4009	18.982	1.31811	4.24656	0.398467	0.0396522
YHR075C	PPE1	1.22557	1.1634	1.05343	13.0204	17.1476	1.31698	4.09993	0.397233	0.0750983
YPR109W	YPR109W	0.689783	0.565158	1.22051	15.5782	20.5107	1.31663	4.35831	0.396852	0.287489
YDR530C	APA2	1.1526	0.952297	1.21034	15.6396	20.5869	1.31633	4.36365	0.396517	0.275407
YPL219W	PCL8	0.760058	0.700756	1.08463	11.8862	15.646	1.31632	3.96773	0.396515	0.117198
YGL144C	ROG1	1.05147	1.11093	0.946478	11.7305	15.4412	1.31632	3.94871	0.396514	-0.0793597
YDL089W	YDL089W	1.20428	1.12883	1.06683	12.399	16.3193	1.31618	4.02851	0.396358	0.0933333
YML077W	BET5	0.833205	0.892345	0.933725	22.8632	30.0917	1.31616	4.91129	0.396337	-0.09893
YIL023C	YKE4	1.02481	1.00357	1.02116	12.9925	17.0919	1.31552	4.09524	0.395631	0.0302145
YBR153W	RIB7	0.866505	0.804646	1.07688	23.1434	30.4199	1.31441	4.92694	0.394413	0.106853
YJR050W	ISY1	1.19297	1.10501	1.0796	18.3566	24.1226	1.31411	4.59231	0.394088	0.110503
YPR127W	YPR127W	0.530322	0.526544	1.00717	15.3108	20.117	1.3139	4.33034	0.39386	0.0103134
YNL092W	YNL092W	0.998858	0.960396	1.04005	7.3384	9.6259	1.31172	3.26692	0.391456	0.0566512
YMR319C	FET4	0.741265	0.621927	1.19188	17.5379	23.0022	1.31157	4.5237	0.391297	0.253244
YGL258W	VEL1	0.845934	0.804972	1.05089	5.7573	7.54948	1.31129	2.91638	0.390986	0.0716078
YNL045W	YNL045W	1.20845	1.08672	1.11201	18.2686	23.9404	1.31047	4.58138	0.390082	0.153172
YJL058C	BIT61	0.971544	0.892895	1.08808	8.50387	11.1398	1.30997	3.47766	0.389538	0.121789
YMR322C	SNO4	0.587973	0.601832	0.976972	4.95751	6.4941	1.30995	2.69913	0.389516	-0.0336111
YDR493W	FMP36	0.906823	0.811908	1.1169	24.0461	31.4682	1.30866	4.97582	0.388092	0.159505
YKL088W	YKL088W	1.0715	0.954452	1.12264	15.9392	20.8581	1.3086	4.38254	0.38803	0.166892
YOR192C	THI72	1.3182	1.14078	1.15553	7.13971	9.34225	1.30849	3.22377	0.387903	0.208553
YMR064W	AEP1	1.03373	1.0516	0.983016	17.9469	23.4795	1.30827	4.55333	0.387662	-0.0247138
YOR257W	CDC31	0.909675	0.890556	1.02147	11.9601	15.6468	1.30825	3.9678	0.387639	0.0306449
YNL099C	OCA1	0.873324	0.833287	1.04805	16.8376	22.0205	1.30782	4.46078	0.387164	0.0677029
YBR162C	TOS1	0.329279	0.264518	1.24483	52.7403	68.9626	1.30759	6.10774	0.386907	0.315947
YHR023W	MYO1	0.73821	0.464744	1.58842	16.2266	21.2038	1.30673	4.40625	0.385959	0.667595
YGR149W	YGR149W	0.584934	0.502815	1.16332	15.8338	20.689	1.30664	4.3708	0.385859	0.218246
YMR065W	KAR5	0.778985	0.707185	1.10153	15.1345	19.7746	1.30659	4.30558	0.385809	0.139507
YNL058C	YNL058C	0.563082	0.523324	1.07597	17.4327	22.7748	1.30645	4.50937	0.385648	0.10564
YDL173W	YDL173W	1.29363	1.15635	1.11871	17.2297	22.4959	1.30564	4.49159	0.384762	0.161842
YGR202C	PCT1	0.743284	0.539793	1.37698	18.5477	24.2116	1.30537	4.59763	0.384459	0.461508
YLR179C	YLR179C	0.6278	0.593577	1.05766	39.1489	51.0951	1.30515	5.67511	0.38421	0.0808701
YJR079W	YJR079W	0.878131	0.901427	0.974156	14.4343	18.8294	1.30449	4.23492	0.383485	-0.0377759
YLR453C	RIF2	0.851459	0.704619	1.2084	29.4243	38.3801	1.30437	5.26229	0.383353	0.273094
YDR367W	YDR367W	0.694197	0.652489	1.06392	10.3908	13.552	1.30423	3.76044	0.383201	0.0893919
YDL021W	GPM2	0.853909	0.602324	1.41769	22.8435	29.7892	1.30406	4.89672	0.383006	0.503542
YKL039W	PTM1	0.87258	0.819269	1.06507	21.0972	27.5003	1.3035	4.78137	0.382394	0.0909504
YDR379W	RGA2	0.978202	1.02474	0.954588	12.9976	16.9138	1.3013	4.08013	0.379956	-0.0670496
YNL122C	YNL122C	0.576116	0.536948	1.07295	18.9227	24.624	1.30129	4.62199	0.379944	0.101577
YIL029C	YIL029C	0.884056	0.714693	1.23697	10.4196	13.5589	1.30129	3.76117	0.379942	0.306813
YER066W	YER066W	1.22202	1.07822	1.13337	9.49133	12.3283	1.2989	3.6239	0.37729	0.180614
YLR055C	SPT8	0.574806	0.529615	1.08533	11.8467	15.3855	1.29871	3.9435	0.377084	0.118131
YMR197C	VTI1	1.02204	1.02354	0.998534	19.4762	25.2719	1.29758	4.65946	0.37582	-0.00211726
YOR228C	YOR228C	0.953719	0.871195	1.09473	9.19997	11.9292	1.29666	3.57643	0.374798	0.130569
YKL038W	RGT1	1.01995	0.975892	1.04515	14.926	19.3445	1.29603	4.27385	0.374101	0.0637086
YOL165C	AAD15	0.568945	0.596632	0.953594	2.70604	3.50695	1.29597	1.81022	0.374033	-0.0685522
YMR241W	YHM2	0.490992	0.507419	0.967626	27.6662	35.8471	1.2957	5.16379	0.373733	-0.0474778
YGL028C	SCW11	0.739969	0.687841	1.07579	110.251	142.849	1.29567	7.15834	0.373699	0.10539
YGL036W	YGL036W	0.443922	0.422552	1.05057	15.868	20.5516	1.29516	4.36118	0.37313	0.0711788
YPL234C	TFP3	0.979457	0.863725	1.13399	26.9677	34.9211	1.29492	5.12603	0.372865	0.18141
YLR206W	ENT2	1.13915	1.05261	1.08221	20.741	26.8563	1.29484	4.74719	0.372775	0.113984
YER128W	YER128W	0.954717	0.886014	1.07754	14.5992	18.8948	1.29423	4.23991	0.372093	0.107743
YDR003W	RCR2	0.753994	0.736111	1.02429	16.0519	20.7675	1.29377	4.37626	0.371586	0.0346298
YLL062C	MHT1	0.803997	0.860752	0.934063	7.95288	10.2744	1.29191	3.36098	0.369502	-0.0984077
YOL025W	LAG2	0.717896	0.619662	1.15853	10.0142	12.933	1.29146	3.69298	0.369005	0.212292
YPR166C	MRP2	1.0232	0.883094	1.15865	33.0808	42.7143	1.29121	5.41665	0.368726	0.212444
YJL072C	PSF2	1.08009	0.923754	1.16924	17.3109	22.3495	1.29107	4.48217	0.368563	0.225574
YHR136C	SPL2	1.1856	1.17422	1.00969	9.5284	12.3017	1.29106	3.62079	0.368552	0.0139091
YDR186C	YDR186C	0.82296	0.823826	0.998949	24.9892	32.2484	1.29049	5.01116	0.367924	-0.0015167
YLR368W	MDM30	0.754473	0.842174	0.895864	11.9882	15.4585	1.28948	3.95033	0.366786	-0.158648
YNR071C	YNR071C	0.579895	0.641576	0.90386	5.40731	6.97083	1.28915	2.80133	0.366421	-0.145829
YOR193W	PEX27	0.45435	0.451636	1.00601	13.9345	17.9558	1.28859	4.16638	0.365789	0.00864344
YKL193C	SDS22	0.978354	0.880944	1.11057	14.2508	18.3522	1.2878	4.19788	0.364906	0.151305
YGR026W	YGR026W	0.878082	0.793684	1.10634	21.0967	27.1646	1.28762	4.76366	0.364712	0.14579
YDL078C	MDH3	1.33056	1.2284	1.08316	13.7703	17.7301	1.28756	4.14813	0.364637	0.115245
YFR051C	RET2	0.994192	0.98352	1.01085	22.8117	29.3602	1.28707	4.87579	0.364087	0.0155693
YGR111W	YGR111W	1.19589	1.14299	1.04628	11.8985	15.3132	1.28699	3.9367	0.363997	0.0652668
YNL180C	RHO5	0.496687	0.415743	1.1947	38.8512	49.9721	1.28624	5.64305	0.363162	0.256647
YAL017W	PSK1	0.86636	0.892843	0.970339	16.0996	20.7054	1.28608	4.37193	0.36298	-0.0434399
YOR215C	YOR215C	0.914954	0.855376	1.06965	16.8086	21.6043	1.28531	4.43325	0.362119	0.0971398
YLR220W	CCC1	0.528585	0.502702	1.05149	18.1655	23.3477	1.28528	4.54521	0.362085	0.0724314
YIL154C	IMP2'	1.0911	1.05533	1.0339	24.8411	31.9225	1.28507	4.9965	0.361845	0.0480948
YML020W	YML020W	1.09633	1.03878	1.0554	11.0066	14.1439	1.28504	3.82211	0.361815	0.0777966
YIL122W	POG1	0.494393	0.456924	1.082	9.02533	11.5959	1.28482	3.53554	0.361562	0.113702
YNL127W	FAR11	0.751132	0.765375	0.98139	9.53072	12.2451	1.2848	3.61413	0.361541	-0.0271016
YMR134W	YMR134W	0.920703	0.759916	1.21159	18.625	23.9283	1.28474	4.58064	0.361471	0.276897
YFR021W	ATG18	0.875101	0.764395	1.14483	16.3152	20.9604	1.28472	4.3896	0.361449	0.195132
YIL049W	DFG10	0.750948	0.652437	1.15099	30.3137	38.9359	1.28443	5.28303	0.361129	0.202875
YCL035C	GRX1	1.0662	0.857478	1.24342	30.2692	38.8389	1.28312	5.27943	0.359651	0.31431
YLL040C	VPS13	0.727179	0.70154	1.03655	12.3722	15.8713	1.28283	3.98835	0.359325	0.0517858
YLR271W	YLR271W	0.929339	0.812543	1.14374	10.5084	13.4758	1.28238	3.7523	0.358827	0.193761
YGR070W	ROM1	0.6623	0.582167	1.13765	15.2065	19.5002	1.28236	4.28542	0.3588	0.186053
YHR005C	GPA1	0.481099	0.313714	1.53356	36.4437	46.7257	1.28213	5.54614	0.358546	0.616886
YOR229W	WTM2	0.953719	0.871195	1.09473	8.90145	11.4126	1.28211	3.51256	0.358518	0.130569
YKR021W	ALY1	1.21508	1.09652	1.10812	11.7789	15.1001	1.28196	3.91649	0.358353	0.148121
YDR252W	BTT1	0.764877	0.70461	1.08553	14.5045	18.5914	1.28177	4.21657	0.358138	0.118403
YGR266W	YGR266W	0.880309	0.835629	1.05347	15.1981	19.4777	1.28159	4.28375	0.357933	0.075148
YLR289W	GUF1	1.09255	0.972223	1.12377	8.68747	11.1333	1.28154	3.47682	0.35788	0.168343
YIR007W	YIR007W	0.639083	0.563672	1.13379	10.6443	13.6281	1.28032	3.76852	0.356508	0.181148
YGR255C	COQ6	0.524837	0.450346	1.16541	14.2136	18.1926	1.27995	4.18528	0.356085	0.220837
YFR049W	YMR31	0.772957	0.738273	1.04698	21.2819	27.2374	1.27984	4.76751	0.355961	0.0662341
YML100W-A	YML100W-A	0.674466	0.600163	1.1238	7.38776	9.45466	1.27977	3.24102	0.355888	0.168391
YOL100W	PKH2	1.03187	0.949995	1.08619	15.3748	19.6751	1.2797	4.2983	0.355803	0.119275
YKL013C	ARC19	1.29337	1.23411	1.04802	19.0723	24.403	1.2795	4.60898	0.355575	0.0676721
YDL086W	YDL086W	1.22446	1.28762	0.950944	25.0609	32.0632	1.27941	5.00285	0.355481	-0.0725677
YAL008W	FUN14	1.13328	1.07134	1.05782	19.143	24.4437	1.2769	4.61139	0.352648	0.0810926
YPR093C	ASR1	1.12751	1.04885	1.075	23.1428	29.5497	1.27684	4.88507	0.352579	0.104335
YKR009C	FOX2	0.829327	0.830258	0.998879	8.88393	11.3395	1.27641	3.50329	0.352089	-0.00161805
YDR262W	YDR262W	0.480999	0.41479	1.15962	25.0787	32.0096	1.27636	5.00043	0.352039	0.213654
YER056C	FCY2	0.313777	0.2798	1.12143	53.555	68.3516	1.27629	6.0949	0.351953	0.165345
YBR004C	GPI18	1.03436	0.863268	1.19819	13.9734	17.8234	1.27552	4.1557	0.351089	0.26086
YOL083W	YOL083W	0.753353	0.654953	1.15024	8.01156	10.2185	1.27547	3.35311	0.351027	0.201935
YMR102C	YMR102C	0.820146	0.79281	1.03448	14.6421	18.6719	1.27522	4.2228	0.350747	0.048906
YMR311C	GLC8	0.972196	0.906494	1.07248	19.7408	25.1711	1.27508	4.6537	0.350593	0.10095
YPR003C	YPR003C	0.918574	0.881158	1.04246	8.53792	10.8795	1.27425	3.44354	0.349652	0.0599945
YJL106W	IME2	1.05433	0.808991	1.30327	6.75484	8.6043	1.2738	3.10506	0.349136	0.382132
YGR236C	SPG1	0.896442	0.886347	1.01139	16.2351	20.6741	1.27342	4.36975	0.348711	0.0163394
YDR067C	OCA6	1.12855	1.01611	1.11065	17.5551	22.3505	1.27316	4.48223	0.348416	0.151409
YDR391C	YDR391C	1.20847	1.13251	1.06708	12.6525	16.095	1.27208	4.00854	0.347186	0.0936622
YKL168C	KKQ8	0.846873	0.820755	1.03182	13.0949	16.6541	1.2718	4.05781	0.346877	0.045194
YJL131C	YJL131C	0.741138	0.754529	0.982252	11.5315	14.6593	1.27124	3.87375	0.346237	-0.0258347
YGR239C	PEX21	0.93901	0.845025	1.11122	18.9835	24.1318	1.2712	4.59287	0.346191	0.152146
YML097C	VPS9	1.02936	1.0048	1.02444	13.2458	16.8228	1.27005	4.07235	0.344885	0.0348384
YLR118C	YLR118C	1.21818	1.12599	1.08187	12.1305	15.4061	1.27003	3.94543	0.34486	0.113532
YMR041C	YMR041C	0.658228	0.518646	1.26913	10.4658	13.2741	1.26834	3.73055	0.342939	0.343839
YFR042W	YFR042W	1.025	0.963532	1.0638	12.1762	15.4427	1.26827	3.94886	0.342866	0.0892203
YMR025W	CSI1	0.939738	0.874843	1.07418	12.0646	15.2953	1.26778	3.93502	0.342302	0.103235
YML117W	NAB6	0.966627	0.746364	1.29511	24.319	30.8299	1.26773	4.94626	0.342249	0.373079
YCR036W	RBK1	0.829343	0.809817	1.02411	19.6269	24.8582	1.26654	4.63565	0.340891	0.034374
YER123W	YCK3	0.983599	0.856205	1.14879	18.2367	23.0765	1.26539	4.52836	0.339584	0.200115
YNL305C	YNL305C	1.02451	0.940425	1.08942	20.1039	25.4178	1.26432	4.66777	0.338365	0.123555
YCR069W	CPR4	1.14475	0.981695	1.1661	21.3344	26.9732	1.2643	4.75345	0.338343	0.221686
YML023C	NSE5	1.00664	0.943067	1.06741	19.998	25.2825	1.26425	4.66007	0.338286	0.0941108
YOR275C	RIM20	0.980542	0.975454	1.00522	13.3828	16.9172	1.2641	4.08042	0.338112	0.00750575
YBL050W	SEC17	0.904528	0.911022	0.992872	21.5797	27.2706	1.26372	4.76928	0.337673	-0.0103201
YGR100W	MDR1	1.042	0.923436	1.12839	11.3846	14.3853	1.26357	3.84653	0.33751	0.174268
YNL320W	YNL320W	0.721767	0.774833	0.931513	8.40109	10.6132	1.26331	3.40779	0.337213	-0.102352
YMR200W	ROT1	0.684105	0.617633	1.10762	31.1045	39.2935	1.26327	5.29622	0.337168	0.147466
YAL031C	GIP4	1.21118	1.06074	1.14183	13.3641	16.8771	1.26287	4.07699	0.336704	0.191351
YMR119W	ASI1	0.538262	0.502121	1.07198	15.8603	20.0265	1.26268	4.32384	0.336485	0.100274
YOL110W	SHR5	0.865416	0.73057	1.18458	13.8319	17.4617	1.26243	4.12612	0.336201	0.244371
YOL042W	NGL1	1.06582	0.976946	1.09097	12.2249	15.4315	1.2623	3.94781	0.33605	0.125615
YLR057W	YLR057W	0.817545	0.772218	1.0587	17.1783	21.6771	1.26189	4.4381	0.335583	0.0822893
YLR456W	YLR456W	0.82542	0.856596	0.963605	13.3584	16.8565	1.26187	4.07524	0.33556	-0.0534867
YPL168W	YPL168W	0.822406	0.815112	1.00895	11.6305	14.6758	1.26184	3.87537	0.335529	0.0128529
YGL018C	JAC1	1.19547	1.14228	1.04657	13.7792	17.3859	1.26175	4.11984	0.335422	0.0656622
YPL236C	YPL236C	0.895613	0.848271	1.05581	13.7686	17.3695	1.26153	4.11848	0.335174	0.078349
YBL005W	PDR3	1.18109	1.07734	1.0963	23.4903	29.6219	1.26103	4.88859	0.334598	0.132647
YPL096W	PNG1	1.23924	1.12315	1.10336	13.567	17.1069	1.26092	4.09651	0.334482	0.141903
YPR033C	HTS1	1.01156	0.792875	1.27581	24.3312	30.6748	1.26072	4.93898	0.334243	0.351412
YIL125W	KGD1	0.796468	0.744497	1.06981	20.2507	25.5265	1.26053	4.67392	0.334025	0.09735
YGR062C	COX18	1.14374	1.23055	0.929461	41.7926	52.6569	1.25996	5.71855	0.333375	-0.105533
YOR124C	UBP2	0.837383	0.742412	1.12792	13.3843	16.8532	1.25918	4.07495	0.332481	0.173666
YDR387C	YDR387C	1.16307	1.06717	1.08987	12.0812	15.2109	1.25905	3.92703	0.33234	0.124152
YNR055C	HOL1	0.627844	0.540628	1.16132	18.5011	23.2901	1.25885	4.54164	0.332103	0.215769
YOR177C	MPC54	0.757155	0.705113	1.07381	5.80134	7.29619	1.25767	2.86714	0.330757	0.102733
YLR023C	IZH3	0.690235	0.606364	1.13832	23.1806	29.1517	1.25759	4.86551	0.330659	0.186905
YMR278W	YMR278W	0.777331	0.780292	0.996204	15.2897	19.22	1.25706	4.26454	0.330048	-0.00548634
YCL048W-A	YCL048W-A	1.22348	1.06318	1.15078	6.3292	7.95512	1.25689	2.99188	0.329862	0.20261
YOR367W	SCP1	0.969152	0.875383	1.10712	18.9944	23.8703	1.2567	4.57715	0.329646	0.146809
YLR165C	PUS5	1.03034	0.934939	1.10203	17.8806	22.4677	1.25654	4.48978	0.329459	0.14017
YPL099C	FMP14	1.00242	1.00436	0.99807	15.4847	19.4524	1.25624	4.28188	0.329109	-0.00278745
YFR047C	BNA6	1.24387	1.19903	1.03739	14.8964	18.71	1.25601	4.22574	0.328842	0.0529585
YOR020W-A	YOR020W-A	0.742459	0.614165	1.20889	19.9563	25.061	1.25579	4.64737	0.3286	0.273686
YGL215W	CLG1	0.741886	0.718409	1.03268	29.1032	36.5339	1.25532	5.19116	0.328057	0.0463929
YLR225C	YLR225C	0.694821	0.644618	1.07788	24.6047	30.8751	1.25485	4.94837	0.327511	0.108197
YGL133W	ITC1	0.532914	0.522155	1.02061	19.634	24.6318	1.25455	4.62245	0.327171	0.0294272
YPL225W	YPL225W	0.859229	0.801034	1.07265	29.6394	37.1826	1.2545	5.21656	0.327112	0.10118
YAL015C	NTG1	0.967112	0.934659	1.03472	14.6714	18.3958	1.25386	4.20131	0.326373	0.0492433
YLR257W	YLR257W	0.575937	0.407113	1.41469	54.8379	68.7175	1.2531	6.1026	0.325503	0.500482
YDR247W	VHS1	0.894942	0.748508	1.19563	16.8207	21.0748	1.25291	4.39745	0.325283	0.257777
YHR210C	YHR210C	0.861934	0.738977	1.16639	6.82657	8.55261	1.25284	3.09637	0.325204	0.222048
YPR165W	RHO1	0.804511	0.768703	1.04658	41.7094	52.2428	1.25254	5.70716	0.324859	0.0656859
YNR001C	CIT1	0.688704	0.467687	1.47258	37.8908	47.4549	1.25241	5.56849	0.324709	0.558342
YLL058W	YLL058W	1.06347	0.993728	1.07018	11.293	14.1374	1.25187	3.82144	0.32408	0.0978531
YGR268C	HUA1	0.908981	0.821588	1.10637	28.776	36.0231	1.25185	5.17085	0.324059	0.145835
YBR258C	SHG1	0.767879	0.759921	1.01047	16.6408	20.8307	1.25179	4.38064	0.323988	0.0150296
YIL074C	SER33	0.809554	0.715389	1.13163	17.7854	22.2629	1.25175	4.47657	0.32395	0.178398
YDR534C	FIT1	0.913233	0.890811	1.02517	5.18283	6.48721	1.25167	2.6976	0.323859	0.0358645
YAL034C	FUN19	1.24523	1.12965	1.10232	18.4717	23.1118	1.2512	4.53056	0.323317	0.140542
YPL277C	YPL277C	0.73261	0.736231	0.995082	5.75176	7.19565	1.25103	2.84713	0.323122	-0.00711327
YER185W	YER185W	1.09346	1.02706	1.06465	7.09212	8.86863	1.25049	3.14871	0.322496	0.0903761
YBR041W	FAT1	0.66202	0.635768	1.04129	15.2805	19.1074	1.25044	4.25606	0.322441	0.0583745
YGR213C	RTA1	0.388226	0.351375	1.10488	9.56545	11.9608	1.25042	3.58025	0.322414	0.143886
YJL100W	LSB6	1.02859	0.940411	1.09376	13.1292	16.4027	1.24932	4.03586	0.321147	0.1293
YOL073C	YOL073C	1.15804	1.0945	1.05805	13.1706	16.4411	1.24832	4.03924	0.319985	0.0814078
YPL017C	IRC15	0.606133	0.535961	1.13093	14.7443	18.4035	1.24818	4.20191	0.319824	0.177507
YOR011W-A	YOR011W-A	0.440661	0.446035	0.987953	4.07335	5.08048	1.24725	2.34496	0.318748	-0.0174852
YPR122W	AXL1	0.766532	0.578172	1.32579	19.8053	24.6994	1.24711	4.6264	0.318591	0.406848
YER033C	ZRG8	0.980164	0.872157	1.12384	10.1056	12.6004	1.24687	3.6554	0.318315	0.168436
YDR251W	PAM1	0.926567	0.901997	1.02724	20.9687	26.1411	1.24667	4.70825	0.318082	0.0387731
YHR084W	STE12	0.789273	0.667245	1.18288	20.7176	25.8262	1.24658	4.69076	0.317978	0.242307
YDR352W	YDR352W	0.662451	0.600722	1.10276	23.6736	29.51	1.24654	4.88313	0.317924	0.141117
YIL139C	REV7	0.850872	0.720654	1.18069	16.9868	21.1666	1.24606	4.40371	0.317372	0.239636
YGL222C	EDC1	1.04735	0.909045	1.15215	32.0932	39.984	1.24587	5.32135	0.317153	0.204324
YLR006C	SSK1	0.895499	0.889125	1.00717	17.0733	21.2683	1.2457	4.41063	0.316958	0.0103064
YHR106W	TRR2	1.27568	1.20664	1.05721	12.3967	15.4412	1.24559	3.94871	0.316824	0.0802685
YER141W	COX15	0.804943	0.753547	1.06821	21.7593	27.0757	1.24433	4.75892	0.315367	0.0951896
YMR264W	CUE1	0.917996	0.862527	1.06431	18.7585	23.3349	1.24397	4.54442	0.314949	0.0899192
YNL242W	ATG2	0.653269	0.624964	1.04529	8.42004	10.4729	1.2438	3.38859	0.31476	0.063906
YDR223W	CRF1	1.07758	0.960031	1.12245	11.259	14.0023	1.24365	3.80759	0.314575	0.166647
YGL006W	PMC1	0.629157	0.555696	1.1322	15.1641	18.8571	1.24353	4.23703	0.314446	0.179124
YJR095W	SFC1	0.752946	0.720725	1.04471	5.99874	7.45595	1.24292	2.89839	0.313731	0.0630981
YKL026C	GPX1	0.986741	0.905371	1.08987	17.1063	21.2572	1.24266	4.40988	0.313428	0.124162
YJL046W	YJL046W	1.10848	1.12889	0.981921	8.65051	10.7481	1.24249	3.42602	0.31323	-0.0263208
YMR026C	PEX12	0.982865	0.940391	1.04517	12.4165	15.421	1.24197	3.94682	0.312634	0.0637337
YKR015C	YKR015C	0.846669	0.715606	1.18315	12.4275	15.429	1.24152	3.94758	0.312108	0.242632
YGR133W	PEX4	1.371	1.22695	1.1174	11.2645	13.9794	1.24101	3.80523	0.311512	0.160144
YDR257C	SET7	0.660887	0.595399	1.10999	15.4912	19.2235	1.24093	4.2648	0.311424	0.150545
YLR454W	FMP27	0.74276	0.670505	1.10776	12.8978	16.0028	1.24074	4.00025	0.311199	0.147649
YKR064W	OAF3	1.05836	1.09942	0.962654	12.7918	15.868	1.24048	3.98805	0.3109	-0.0549108
YOL071W	EMI5	1.08167	0.959111	1.12779	21.9463	27.2233	1.24045	4.76677	0.310862	0.173493
YOL026C	MIM1	1.27581	1.19468	1.06791	27.9608	34.6787	1.24026	5.11598	0.310643	0.0947907
YGL129C	RSM23	1.1196	0.985363	1.13623	14.7947	18.3484	1.2402	4.19758	0.310571	0.184259
YDR178W	SDH4	0.829022	0.743829	1.11453	16.7	20.7095	1.24009	4.37222	0.310443	0.156439
YDL077C	VAM6	1.08785	0.888202	1.22478	9.09809	11.2747	1.23924	3.49502	0.309452	0.292519
YBR117C	TKL2	1.05285	0.87858	1.19836	12.0945	14.9859	1.23907	3.90554	0.309254	0.261059
YBR108W	YBR108W	1.03312	0.981526	1.05257	9.17453	11.3673	1.239	3.50681	0.309178	0.0739119
YHR078W	YHR078W	1.15245	1.09753	1.05005	13.9557	17.285	1.23856	4.11145	0.308668	0.070452
YBR211C	AME1	0.959007	0.935702	1.02491	14.9721	18.539	1.23823	4.21249	0.308282	0.0354929
YJL049W	YJL049W	0.914341	0.806765	1.13334	14.2226	17.6102	1.23819	4.13834	0.30823	0.180585
YCR020C	PET18	0.888758	0.843766	1.05332	13.6083	16.8478	1.23805	4.07449	0.308071	0.0749478
YDR105C	TMS1	0.993685	0.997738	0.995938	14.086	17.4377	1.23795	4.12414	0.307954	-0.00587255
YJR085C	YJR085C	1.12177	1.03381	1.08509	22.0663	27.3163	1.23792	4.77169	0.307916	0.11781
YDR162C	NBP2	1.10959	1.06401	1.04284	13.0401	16.1421	1.23788	4.01276	0.307873	0.0605169
YBR131W	CCZ1	1.15066	1.05537	1.09029	11.1397	13.7896	1.23788	3.78551	0.30787	0.124713
YGR250C	YGR250C	0.883466	0.673644	1.31147	11.4005	14.1118	1.23782	3.81883	0.307806	0.391188
YMR159C	ATG16	1.20268	1.22513	0.981674	9.50702	11.7628	1.23728	3.55616	0.307166	-0.0266835
YPR157W	YPR157W	0.406395	0.313713	1.29543	7.37568	9.12425	1.23707	3.18971	0.30693	0.373434
YIL002W-A	YIL002W-A	0.8363	0.805058	1.03881	29.4105	36.3765	1.23685	5.18494	0.306676	0.0549274
YDR018C	YDR018C	0.879193	0.797092	1.103	11.7485	14.5255	1.23637	3.86051	0.306113	0.141434
YKL001C	MET14	1.02115	0.932935	1.09455	15.7687	19.4959	1.23637	4.2851	0.306112	0.130344
YDL190C	UFD2	1.11813	1.03549	1.07981	18.1405	22.4221	1.23602	4.48685	0.305707	0.110781
YNR026C	SEC12	1.14968	1.09085	1.05393	10.9613	13.5473	1.23592	3.75994	0.305586	0.0757743
YOR374W	ALD4	0.763793	0.720876	1.05953	32.1754	39.7653	1.23589	5.31344	0.305552	0.0834305
YFR007W	YFR007W	1.20122	1.04287	1.15185	14.663	18.1205	1.23579	4.17955	0.305439	0.203947
YBR043C	QDR3	0.83285	0.67146	1.24036	17.9953	22.2376	1.23574	4.47493	0.305378	0.310754
YJR047C	ANB1	0.466465	0.505525	0.922734	6.45738	7.97934	1.23569	2.99627	0.305319	-0.116014
YGL251C	HFM1	0.905468	0.803452	1.12697	10.7518	13.2838	1.23551	3.7316	0.305101	0.172452
YGL044C	RNA15	0.938543	0.85435	1.09855	13.1764	16.2641	1.23434	4.02362	0.303736	0.135596
YLR351C	NIT3	1.32629	1.2075	1.09838	22.2642	27.4734	1.23397	4.77996	0.303308	0.135381
YDR031W	MIC14	1.11308	1.06189	1.0482	19.4036	23.9361	1.23359	4.58112	0.30286	0.0679122
YCL056C	YCL056C	1.06124	1.03469	1.02565	29.939	36.9299	1.23351	5.20672	0.302765	0.0365419
YGL247W	BRR6	1.06628	0.952171	1.11984	26.129	32.2295	1.23347	5.01031	0.302728	0.163294
YNL336W	COS1	0.219062	0.26104	0.839187	8.17752	10.0853	1.23329	3.33418	0.302516	-0.252936
YKL220C	FRE2	1.13555	1.12316	1.01104	8.08625	9.96958	1.23291	3.31753	0.302062	0.0158341
YIL041W	GVP36	1.34276	1.35588	0.990326	20.6093	25.3936	1.23214	4.66639	0.301167	-0.0140244
YIL037C	PRM2	0.653821	0.565402	1.15638	10.4246	12.8444	1.23211	3.68306	0.301136	0.209618
YAL068C	PAU8	0.931107	0.959173	0.970739	1.89506	2.33467	1.23197	1.22322	0.300969	-0.0428443
YGR125W	YGR125W	0.665801	0.531889	1.25177	14.4361	17.7803	1.23166	4.15221	0.300603	0.323966
YMR114C	YMR114C	1.15468	1.16766	0.988882	8.19279	10.0881	1.23134	3.33459	0.30023	-0.01613
YNR067C	DSE4	0.661856	0.561159	1.17944	53.7452	66.1334	1.2305	6.04731	0.299244	0.238108
YPR106W	ISR1	0.9196	0.88999	1.03327	23.2336	28.5802	1.23012	4.83694	0.298801	0.0472174
YKL100C	YKL100C	0.794939	0.786336	1.01094	20.7864	25.5605	1.22968	4.67584	0.29828	0.0156981
YNL038W	GPI15	0.760252	0.685348	1.10929	20.4218	25.097	1.22893	4.64945	0.297408	0.149641
YDL027C	YDL027C	0.757646	0.675446	1.1217	15.522	19.0716	1.22868	4.25336	0.297115	0.165684
YGL027C	CWH41	0.954415	0.830503	1.1492	13.73	16.8697	1.22867	4.07636	0.2971	0.200631
YPL140C	MKK2	0.847503	0.723857	1.17082	9.74545	11.9707	1.22834	3.58144	0.296708	0.227514
YOR255W	OSW1	0.795858	0.859067	0.926421	4.92588	6.04484	1.22716	2.59571	0.295324	-0.110259
YNL274C	YNL274C	1.12774	1.09981	1.0254	13.2644	16.2728	1.22681	4.02439	0.294912	0.0361805
YMR226C	TMA29	1.00896	1.01588	0.993192	25.0654	30.7431	1.22652	4.94219	0.294566	-0.00985484
YMR323W	ERR3	0.456405	0.458707	0.994981	3.38028	4.14453	1.22609	2.05121	0.294065	-0.00725869
YGL221C	NIF3	1.20404	1.12037	1.07468	19.642	24.0727	1.22557	4.58932	0.293458	0.103908
YLR461W	PAU4	0.96057	0.859226	1.11795	2.68461	3.2877	1.22465	1.71708	0.292366	0.160853
YEL029C	BUD16	1.15582	1.02866	1.12361	13.9859	17.1275	1.22463	4.09824	0.292342	0.168147
YML062C	MFT1	0.943754	0.886814	1.06421	20.039	24.5396	1.22459	4.61704	0.292302	0.0897798
YHR072W	ERG7	0.855103	0.857757	0.996906	16.7695	20.5325	1.22439	4.35983	0.292064	-0.00447107
YJL062W-A	YJL062W-A	1.24123	1.1428	1.08613	24.7787	30.3145	1.22341	4.92194	0.290909	0.119198
YGL049C	TIF4632	0.890535	0.824264	1.0804	12.7232	15.5648	1.22333	3.96021	0.290818	0.111566
YPR065W	ROX1	0.485608	0.357882	1.35689	38.6672	47.2997	1.22325	5.56376	0.290721	0.440307
YLR266C	PDR8	1.31137	1.01182	1.29605	13.7749	16.8477	1.22308	4.07448	0.290515	0.374124
YCR066W	RAD18	0.947828	0.816479	1.16087	12.0701	14.7612	1.22296	3.88374	0.290373	0.215209
YER034W	YER034W	0.636742	0.617758	1.03073	13.7056	16.7529	1.22234	4.06634	0.289648	0.0436694
YGL081W	YGL081W	0.676833	0.698773	0.968602	6.35094	7.76028	1.22191	2.95611	0.289139	-0.0460238
YOL018C	TLG2	0.807506	0.700762	1.15232	11.18	13.6554	1.22141	3.7714	0.288552	0.204547
YPL070W	MUK1	1.02584	0.857305	1.19659	10.6142	12.9639	1.22137	3.69643	0.288498	0.258927
YDL157C	YDL157C	0.963847	0.885203	1.08884	12.9817	15.8518	1.22109	3.98658	0.288169	0.122797
YML110C	COQ5	1.17765	1.12188	1.04972	16.0852	19.6411	1.22107	4.29581	0.288148	0.0699994
YNL100W	YNL100W	0.847334	0.814019	1.04093	25.3163	30.9118	1.22102	4.95009	0.288091	0.057868
YGR207C	YGR207C	0.851133	0.846637	1.00531	18.0047	21.9805	1.22082	4.45815	0.287853	0.00764124
YDL085C-A	YDL085C-A	0.920852	0.767474	1.19985	21.9833	26.8365	1.22077	4.74612	0.287789	0.262851
YNL202W	SPS19	0.943046	0.949719	0.992973	9.30209	11.3553	1.22073	3.50529	0.28774	-0.0101735
YNL298W	CLA4	0.821076	0.651032	1.26119	16.8044	20.5061	1.22028	4.35798	0.287215	0.334787
YIL099W	SGA1	0.496939	0.418642	1.18703	6.54138	7.98092	1.22007	2.99656	0.28696	0.247351
YJL016W	YJL016W	0.686523	0.518672	1.32362	24.2798	29.611	1.21957	4.88806	0.286375	0.404484
YER011W	TIR1	0.966429	0.89407	1.08093	4.86777	5.9361	1.21947	2.56951	0.286253	0.112276
YMR040W	YET2	1.26371	1.13086	1.11748	11.9294	14.5451	1.21926	3.86246	0.286009	0.160252
YPL059W	GRX5	0.965043	0.8605	1.12149	20.2537	24.6884	1.21896	4.62576	0.285649	0.165419
YDR071C	PAA1	0.610341	0.522312	1.16854	21.715	26.4651	1.21874	4.72602	0.285396	0.224703
YHR199C	FMP34	1.23225	1.13568	1.08503	20.5798	25.0801	1.21867	4.64847	0.285311	0.117735
YKL206C	ADD66	1.04105	0.95521	1.08986	21.9205	26.6969	1.2179	4.7386	0.284393	0.124145
YLR092W	SUL2	1.05926	0.929295	1.13986	10.5358	12.8261	1.21738	3.68101	0.283779	0.188853
YKL114C	APN1	0.873193	0.772719	1.13003	17.3083	21.0703	1.21735	4.39714	0.283743	0.176356
YBR065C	ECM2	0.70417	0.748948	0.940212	11.6101	14.1283	1.2169	3.82052	0.283212	-0.0889425
YBR262C	FMP51	1.09866	1.05503	1.04135	20.7914	25.298	1.21676	4.66095	0.283039	0.0584491
YDR040C	ENA1	0.936736	0.518173	1.80776	17.7149	21.5517	1.21658	4.42973	0.282835	0.854207
YBL086C	YBL086C	0.934865	0.870126	1.0744	10.6036	12.8991	1.21648	3.6892	0.282711	0.103534
YOR147W	MDM32	0.640424	0.686648	0.932682	19.2801	23.4488	1.21621	4.55144	0.282398	-0.100543
YIL042C	PKP1	1.34276	1.35588	0.990326	13.8895	16.8846	1.21564	4.07764	0.281711	-0.0140244
YMR181C	YMR181C	0.970468	0.873684	1.11078	48.8327	59.3589	1.21556	5.89139	0.281617	0.15157
YKL002W	DID4	1.16545	1.15062	1.01289	16.9794	20.6372	1.21543	4.36717	0.281462	0.0184815
YJL082W	IML2	0.517196	0.4839	1.06881	18.3141	22.2474	1.21477	4.47556	0.280679	0.0960042
YBR223C	TDP1	1.15864	1.13003	1.02532	9.87895	11.9993	1.21463	3.58488	0.280522	0.0360789
YER080W	FMP29	0.966428	0.924032	1.04588	14.0237	17.033	1.21459	4.09026	0.280465	0.06472
YPR151C	SUE1	1.13339	1.06263	1.06659	18.2183	22.1244	1.21441	4.46757	0.28025	0.0930117
YFR012W	YFR012W	0.571319	0.509166	1.12207	4.47652	5.43595	1.21433	2.44253	0.280155	0.16616
YPL110C	GDE1	1.14654	1.09479	1.04727	11.6245	14.1157	1.21431	3.81923	0.280137	0.0666286
YDR322C-A	TIM11	0.901188	0.830908	1.08458	27.0392	32.8299	1.21416	5.03694	0.279955	0.117138
YOL112W	MSB4	0.772051	0.633158	1.21936	18.777	22.7916	1.21381	4.51043	0.279539	0.28613
YGR044C	RME1	0.866245	0.542044	1.59811	18.1002	21.9669	1.21363	4.45726	0.279326	0.676366
YDR478W	SNM1	0.811816	0.78406	1.0354	17.7499	21.5295	1.21293	4.42824	0.2785	0.0501871
YNR070W	YNR070W	0.578262	0.573763	1.00784	9.61588	11.6593	1.2125	3.5434	0.277985	0.011268
YLR207W	HRD3	0.668633	0.66517	1.00521	9.80274	11.8848	1.2124	3.57105	0.277861	0.00749099
YBR111C	YSA1	1.10608	0.852784	1.29702	18.7164	22.667	1.21108	4.50252	0.276291	0.375205
YDL181W	INH1	0.95346	0.747704	1.27518	32.3088	39.1223	1.21089	5.28992	0.276064	0.350705
YDL110C	TMA17	1.00357	0.898976	1.11634	42.7247	51.7266	1.2107	5.69283	0.275837	0.15878
YMR152W	YIM1	0.912694	0.747911	1.22032	18.3606	22.2286	1.21067	4.47434	0.275801	0.287264
YJR125C	ENT3	0.948353	0.932058	1.01748	16.2401	19.6544	1.21024	4.29678	0.275289	0.0250046
YMR061W	RNA14	1.02651	0.968917	1.05944	18.0498	21.844	1.21021	4.44916	0.275254	0.0833078
YPR086W	SUA7	1.07249	1.02088	1.05056	12.3612	14.9521	1.2096	3.90228	0.274529	0.071153
YOR011W	AUS1	1.09931	1.12597	0.976321	6.70007	8.10099	1.20909	3.0181	0.273923	-0.034572
YNL294C	RIM21	1.134	1.08585	1.04435	13.8876	16.7891	1.20893	4.06945	0.273728	0.062601
YMR170C	ALD2	1.18603	1.11238	1.06621	13.8188	16.6998	1.20848	4.06175	0.27319	0.0924928
YIL162W	SUC2	0.962104	0.817811	1.17644	6.91524	8.35646	1.20841	3.06289	0.273113	0.234425
YMR158W	MRPS8	1.16247	1.08471	1.07169	14.6323	17.6816	1.2084	4.14418	0.273097	0.0998857
YOR328W	PDR10	0.96637	0.867683	1.11374	7.09715	8.57345	1.20801	3.09988	0.272636	0.155407
YDR311W	TFB1	1.02129	0.963382	1.06011	12.5577	15.1663	1.20773	3.9228	0.272294	0.0842177
YHR142W	CHS7	0.723415	0.596168	1.21344	35.9911	43.4617	1.20757	5.44167	0.272103	0.279105
YBR228W	SLX1	1.02149	0.921103	1.10899	14.8382	17.9133	1.20724	4.16296	0.271714	0.149243
YKL179C	COY1	0.918816	0.885159	1.03802	19.0634	23.0076	1.2069	4.52404	0.271302	0.0538402
YGR199W	PMT6	0.807574	0.658154	1.22703	16.9226	20.4218	1.20677	4.35204	0.271154	0.29517
YOL159C	YOL159C	0.870834	0.834177	1.04394	11.9648	14.4359	1.20653	3.85159	0.270868	0.0620428
YNL227C	JJJ1	0.66419	0.651101	1.0201	12.3548	14.904	1.20633	3.89762	0.27062	0.0287162
YDR287W	YDR287W	1.10203	1.07544	1.02473	10.7435	12.9598	1.2063	3.69598	0.270588	0.0352427
YLR284C	ECI1	1.12255	1.08285	1.03666	10.0917	12.1654	1.20549	3.60471	0.269619	0.0519429
YDR424C	DYN2	1.16118	1.04965	1.10625	32.3865	39.0343	1.20526	5.28667	0.269349	0.145682
YBR150C	TBS1	0.584321	0.538611	1.08487	14.5265	17.5082	1.20526	4.12996	0.269348	0.117517
YFR011C	YFR011C	0.56526	0.50296	1.12387	16.8465	20.3029	1.20517	4.34361	0.269235	0.168471
YBR227C	MCX1	1.02149	0.921103	1.10899	11.4069	13.7332	1.20393	3.77959	0.267755	0.149243
YOR268C	YOR268C	1.01783	0.949105	1.07241	4.88956	5.88244	1.20306	2.55641	0.266708	0.100855
YPR071W	YPR071W	0.923133	0.804404	1.1476	11.2681	13.5509	1.20259	3.76031	0.266147	0.198619
YGL005C	COG7	1.10376	1.03059	1.071	13.0893	15.7285	1.20163	3.97531	0.264988	0.0989544
YIL161W	YIL161W	0.576481	0.524803	1.09847	10.3625	12.4512	1.20157	3.63821	0.264915	0.135495
YKR049C	FMP46	1.49691	1.54596	0.96827	12.5875	15.121	1.20127	3.91848	0.264557	-0.0465193
YNL040W	YNL040W	1.22339	1.11476	1.09745	9.84858	11.8291	1.2011	3.56427	0.264351	0.134154
YJR119C	YJR119C	0.866676	0.847774	1.0223	9.29752	11.165	1.20086	3.48092	0.264072	0.0318135
YCR030C	SYP1	0.871578	0.803158	1.08519	19.6236	23.5615	1.20067	4.55836	0.263842	0.117946
YMR111C	YMR111C	0.951673	0.89485	1.0635	8.75134	10.5053	1.20043	3.39305	0.263548	0.0888198
YGL119W	ABC1	0.968648	0.894313	1.08312	9.02593	10.8322	1.20012	3.43725	0.263177	0.115192
YJL203W	PRP21	1.0186	1.0151	1.00344	13.7815	16.5389	1.20009	4.04779	0.263138	0.00495856
YML022W	APT1	1.00664	0.943067	1.06741	27.3114	32.7694	1.19984	5.03428	0.262847	0.0941108
YKL159C	RCN1	1.06109	1.03704	1.02319	18.8442	22.6091	1.19979	4.49883	0.262779	0.0330765
YJL221C	FSP2	0.402385	0.396245	1.01549	3.35514	4.02536	1.19976	2.00912	0.262746	0.0221831
YCL025C	AGP1	0.319598	0.324204	0.985795	28.5104	34.1987	1.19952	5.09587	0.262451	-0.0206409
YBR111W-A	SUS1	1.10608	0.852784	1.29702	22.4817	26.9627	1.19932	4.7529	0.262213	0.375205
YDR375C	BCS1	1.01667	0.937523	1.08442	15.2023	18.2264	1.19893	4.18796	0.261745	0.116929
YMR122W-A	YMR122W-A	0.594686	0.428548	1.38768	229.115	274.571	1.1984	8.10103	0.261107	0.472673
YCR088W	ABP1	0.967883	1.01862	0.950188	17.3036	20.736	1.19836	4.37407	0.261067	-0.0737148
YPR129W	SCD6	1.06482	0.988386	1.07733	20.0473	24.0012	1.19723	4.58503	0.259701	0.107465
YOL015W	IRC10	1.12834	0.931841	1.21087	7.04964	8.4373	1.19684	3.07678	0.259231	0.276046
YER092W	IES5	0.523352	0.421409	1.24191	32.6212	39.0218	1.19621	5.28621	0.25847	0.312559
YGL194C	HOS2	0.923286	0.942797	0.979305	20.9207	25.0133	1.19563	4.64462	0.257767	-0.0301698
YNL154C	YCK2	0.731749	0.574489	1.27374	28.3275	33.8541	1.1951	5.08126	0.25713	0.349069
YDR505C	PSP1	0.880864	0.747159	1.17895	18.5846	22.1964	1.19434	4.47225	0.256217	0.237504
YCL052C	PBN1	1.20753	1.10912	1.08872	13.2546	15.8305	1.19434	3.98463	0.256209	0.122632
YGL061C	DUO1	1.09443	1.03001	1.06255	11.494	13.7223	1.19386	3.77845	0.255631	0.0875265
YOL138C	YOL138C	0.968218	0.867056	1.11667	10.2752	12.2638	1.19353	3.61633	0.25524	0.159208
YCL055W	KAR4	0.799473	0.574887	1.39066	43.4259	51.8236	1.19338	5.69554	0.255054	0.475772
YKL015W	PUT3	0.682769	0.608909	1.1213	13.1597	15.7033	1.19329	3.973	0.254946	0.165169
YHR007C-A	YHR007C-A	0.664195	0.596455	1.11357	46.1596	55.0805	1.19326	5.78347	0.254913	0.155194
YBR076W	ECM8	0.943594	0.927322	1.01755	13.4535	16.0534	1.19325	4.00481	0.254901	0.0250967
YPR066W	UBA3	0.711148	0.603608	1.17816	28.6291	34.1602	1.1932	5.09425	0.254837	0.236537
YIL124W	AYR1	0.611563	0.617214	0.990844	33.8144	40.3467	1.19318	5.33438	0.254812	-0.0132699
YGR189C	CRH1	0.643913	0.541266	1.18964	53.9773	64.3724	1.19258	6.00837	0.25409	0.250529
YLL051C	FRE6	0.649513	0.622311	1.04371	15.0623	17.9583	1.19227	4.16658	0.253708	0.0617207
YOR012W	YOR012W	0.868571	0.878694	0.988479	21.2768	25.3669	1.19223	4.66488	0.253667	-0.0167173
YHR083W	SAM35	1.12659	1.07141	1.0515	26.2179	31.2538	1.19208	4.96596	0.253476	0.0724531
YBR204C	YBR204C	1.20949	1.17775	1.02694	10.0534	11.984	1.19203	3.58303	0.25342	0.0383578
YLR390W-A	CCW14	0.843299	0.795243	1.06043	42.9317	51.1704	1.1919	5.67724	0.253266	0.0846482
YOR311C	HSD1	0.871934	0.785771	1.10965	18.756	22.353	1.19178	4.4824	0.253114	0.150109
YGL249W	ZIP2	0.761726	0.666349	1.14313	12.4283	14.8068	1.19138	3.88819	0.252637	0.192994
YHR105W	YPT35	1.0467	0.997378	1.04945	12.3179	14.6716	1.19108	3.87496	0.252271	0.0696369
YGL130W	CEG1	1.07045	1.05356	1.01603	12.3613	14.7219	1.19097	3.87989	0.252139	0.0229434
YHR001W-A	QCR10	0.829816	0.802713	1.03376	23.9054	28.4681	1.19087	4.83128	0.252014	0.0479064
YNL288W	CAF40	1.16462	1.08537	1.07302	19.8915	23.6781	1.19036	4.56548	0.251401	0.101678
YCL038C	ATG22	0.683375	0.689965	0.990449	10.524	12.5187	1.18953	3.64601	0.250395	-0.0138457
YLR163C	MAS1	1.01569	0.877706	1.15721	21.6312	25.727	1.18935	4.68521	0.250169	0.210647
YMR029C	FAR8	1.26216	1.14531	1.10202	14.0775	16.7405	1.18917	4.06527	0.249954	0.140155
YDR179C	CSN9	0.908906	0.861881	1.05456	11.3464	13.49	1.18892	3.75382	0.249654	0.0766432
YNR030W	ALG12	0.836884	0.828678	1.0099	11.8187	14.0511	1.18889	3.81261	0.249609	0.0142148
YHR151C	YHR151C	0.728693	0.719021	1.01345	14.0087	16.6542	1.18884	4.05781	0.24956	0.0192789
YBR253W	SRB6	0.996552	1.02465	0.972578	31.0824	36.9453	1.18862	5.20732	0.249293	-0.0401139
YDL174C	DLD1	1.18567	1.04433	1.13533	19.2189	22.8391	1.18837	4.51344	0.24898	0.183118
YNL074C	MLF3	1.07739	1.03733	1.03862	15.1361	17.9861	1.18829	4.16881	0.248886	0.0546642
YDR306C	YDR306C	0.952033	0.782612	1.21648	12.8891	15.3129	1.18805	3.93668	0.248601	0.282714
YJR147W	HMS2	0.72034	0.792334	0.909137	32.9102	39.0906	1.1878	5.28875	0.248286	-0.137431
YPL172C	COX10	0.652902	0.655094	0.996654	12.3805	14.6969	1.18711	3.87744	0.247448	-0.00483496
YDR484W	VPS52	0.631602	0.604993	1.04398	12.0558	14.3064	1.18668	3.83859	0.246927	0.0620969
YNL153C	GIM3	1.35232	1.14714	1.17887	22.7061	26.9392	1.18643	4.75164	0.246631	0.237402
YDL248W	COS7	0.504821	0.559126	0.902875	9.80606	11.633	1.18631	3.54016	0.246483	-0.147402
YMR110C	HFD1	0.58302	0.513466	1.13546	18.7197	22.2043	1.18615	4.47277	0.246282	0.183278
YGR243W	FMP43	0.474785	0.40618	1.1689	19.3379	22.9292	1.18571	4.51912	0.245754	0.225157
YDR322W	MRPL35	0.7867	0.728794	1.07945	16.0063	18.9772	1.18561	4.2462	0.24563	0.110301
YHR176W	FMO1	1.23066	1.13536	1.08394	9.29051	11.0091	1.18499	3.46063	0.244871	0.11628
YLR213C	CRR1	0.70997	0.764844	0.928255	8.6569	10.258	1.18495	3.35867	0.244823	-0.107406
YBR182C	SMP1	1.09617	0.925121	1.1849	9.2048	10.9069	1.18492	3.44717	0.244788	0.244763
YLR128W	DCN1	1.15152	1.1163	1.03155	9.96891	11.8069	1.18438	3.56156	0.244128	0.0448175
YJL212C	OPT1	0.926014	0.917001	1.00983	16.9552	20.0794	1.18426	4.32765	0.243987	0.0141109
YBR176W	ECM31	0.714218	0.687614	1.03869	16.427	19.4535	1.18424	4.28196	0.24396	0.0547663
YKL091C	YKL091C	1.00338	0.955438	1.05018	24.1154	28.5537	1.18405	4.83561	0.243725	0.070631
YOR365C	YOR365C	0.869307	0.846049	1.02749	10.9704	12.9893	1.18403	3.69925	0.243703	0.0391237
YDL215C	GDH2	0.90549	0.804881	1.125	20.7222	24.5349	1.18399	4.61676	0.243658	0.169923
YJR049C	UTR1	1.19297	1.10501	1.0796	13.3101	15.759	1.18399	3.9781	0.243656	0.110503
YDL045C	FAD1	0.849316	0.703021	1.20809	14.7438	17.4562	1.18397	4.12567	0.243633	0.272733
YLR026C	SED5	0.615757	0.515292	1.19497	14.6159	17.2993	1.1836	4.11265	0.243179	0.256971
YOR355W	GDS1	0.343859	0.392356	0.876396	35.7709	42.3345	1.18349	5.40376	0.243046	-0.190345
YPL034W	YPL034W	0.834178	0.826465	1.00933	14.9859	17.7333	1.18333	4.14839	0.242852	0.0134015
YJL201W	ECM25	0.934782	0.850746	1.09878	20.9017	24.7334	1.18332	4.62839	0.242842	0.135902
YKR099W	BAS1	0.532454	0.486669	1.09408	11.1217	13.1577	1.18307	3.71783	0.242531	0.129716
YDL019C	OSH2	1.01502	0.802678	1.26454	14.3737	17.0026	1.1829	4.08768	0.242328	0.338609
YDR169C	STB3	1.03552	0.961128	1.0774	15.9802	18.9009	1.18277	4.24039	0.242168	0.107553
YOR211C	MGM1	0.849806	0.821927	1.03392	16.1965	19.1565	1.18275	4.25976	0.242149	0.0481222
YJL179W	PFD1	0.971761	0.928852	1.0462	18.165	21.482	1.18261	4.42506	0.24197	0.0651529
YIR008C	PRI1	1.20068	1.12209	1.07003	12.485	14.761	1.1823	3.88372	0.241598	0.0976571
YBR006W	UGA2	0.773378	0.744855	1.03829	16.8539	19.9187	1.18185	4.31605	0.241044	0.0542139
YDR511W	ACN9	1.0371	0.978803	1.05956	33.2376	39.2658	1.18137	5.2952	0.240458	0.083463
YOL122C	SMF1	0.859428	0.672235	1.27846	19.8083	23.3984	1.18124	4.54834	0.240303	0.354412
YGL230C	YGL230C	0.724093	0.65472	1.10596	11.1321	13.1477	1.18106	3.71674	0.24008	0.145297
YOR389W	YOR389W	0.784875	0.759043	1.03403	5.18148	6.1184	1.18082	2.61315	0.23979	0.0482818
YBR063C	YBR063C	0.667323	0.729552	0.914701	11.7365	13.8519	1.18024	3.79201	0.239082	-0.128627
YGL197W	MDS3	0.876762	0.767679	1.1421	16.9169	19.965	1.18018	4.3194	0.239008	0.191684
YNL293W	MSB3	1.134	1.08585	1.04435	11.9011	14.04	1.17972	3.81147	0.238447	0.062601
YGR247W	CPD1	0.805494	0.787193	1.02325	12.3545	14.5742	1.17967	3.86535	0.238378	0.0331581
YPL049C	DIG1	0.846188	0.661363	1.27946	25.9984	30.6676	1.1796	4.93864	0.238293	0.355535
YER101C	AST2	0.568357	0.55168	1.03023	9.77058	11.5253	1.1796	3.52674	0.238293	0.0429634
YJL103C	GSM1	1.21396	1.19118	1.01913	6.61183	7.79434	1.17885	2.96243	0.237377	0.0273323
YPL271W	ATP15	0.964322	0.985366	0.978643	37.3279	44.0007	1.17876	5.45946	0.237274	-0.0311449
YOR108W	LEU9	0.557464	0.475899	1.17139	25.5442	30.1044	1.17852	4.9119	0.236982	0.228224
YBR001C	NTH2	0.512343	0.458522	1.11738	19.6748	23.1864	1.17848	4.53521	0.236931	0.160118
YMR304W	UBP15	0.675202	0.619013	1.09077	13.2089	15.5646	1.17834	3.96019	0.23675	0.125351
YJL140W	RPB4	0.579569	0.528956	1.09569	38.5265	45.3742	1.17774	5.5038	0.236022	0.131834
YPL060W	LPE10	0.679531	0.665547	1.02101	10.8464	12.7737	1.17769	3.6751	0.235954	0.029998
YNR002C	ATO2	1.09948	1.08311	1.01511	15.2069	17.9077	1.17761	4.16251	0.235859	0.0216419
YGL138C	YGL138C	0.678482	0.663058	1.02326	5.12518	6.03522	1.17756	2.59341	0.235802	0.0331747
YGR007W	MUQ1	1.27934	1.17653	1.08739	33.9688	39.9886	1.17722	5.32152	0.235382	0.120867
YPL224C	MMT2	1.24058	1.16026	1.06923	12.0748	14.2135	1.17712	3.82919	0.235262	0.0965687
YLR200W	YKE2	0.902014	0.902294	0.99969	18.2006	21.4207	1.17692	4.42093	0.235021	-0.000447775
YJR080C	FMP26	0.940676	0.922072	1.02018	15.7035	18.4727	1.17634	4.20732	0.234308	0.0288182
YIR037W	HYR1	1.24552	1.18502	1.05105	18.4647	21.7156	1.17606	4.44066	0.233966	0.071838
YPL203W	TPK2	0.603882	0.55116	1.09566	12.5419	14.7465	1.17578	3.8823	0.233616	0.131795
YIL097W	FYV10	1.01715	1.02207	0.995192	9.23595	10.8592	1.17575	3.44084	0.233583	-0.00695368
YHR028C	DAP2	0.727205	0.644144	1.12895	26.7073	31.4002	1.17572	4.9727	0.233542	0.174978
YDL194W	SNF3	0.685929	0.707338	0.969733	5.55821	6.53439	1.17563	2.70805	0.233432	-0.0443403
YDL113C	ATG20	0.999017	1.03183	0.968199	12.4187	14.598	1.17549	3.8677	0.233261	-0.0466242
YDR099W	BMH2	0.688185	0.642767	1.07066	41.3294	48.5713	1.17522	5.60203	0.232936	0.0985005
YOR348C	PUT4	0.554364	0.479441	1.15627	3.97212	4.66772	1.17512	2.22272	0.232809	0.20948
YDR403W	DIT1	0.75497	0.801455	0.941999	6.5095	7.64853	1.17498	2.93518	0.232637	-0.0862018
YDL045W-A	MRP10	0.792829	0.748994	1.05852	31.3574	36.8417	1.17489	5.20327	0.232531	0.0820552
YLR363C	NMD4	0.785935	0.857437	0.91661	13.843	16.2619	1.17474	4.02342	0.232342	-0.12562
YFR005C	SAD1	0.848945	0.46201	1.8375	15.9944	18.7787	1.17408	4.23103	0.231528	0.877747
YKL040C	NFU1	0.958656	0.915147	1.04754	20.7661	24.3772	1.17389	4.60746	0.231301	0.0670104
YER148W	SPT15	0.872591	0.826956	1.05518	23.3939	27.4605	1.17383	4.77928	0.231225	0.0774956
YGR020C	VMA7	1.06437	1.01343	1.05027	33.7075	39.5663	1.17381	5.3062	0.2312	0.0707546
YDR201W	SPC19	1.2403	1.2528	0.990024	12.7735	14.9932	1.17378	3.90624	0.231159	-0.0144641
YJR010C-A	SPC1	1.01264	0.999126	1.01353	25.1215	29.4865	1.17375	4.88198	0.231131	0.0193859
YFL041W	FET5	0.987314	0.945575	1.04414	9.10226	10.6821	1.17356	3.41712	0.230894	0.0623174
YGL250W	YGL250W	0.891383	0.892427	0.99883	14.7427	17.2944	1.17308	4.11223	0.230306	-0.00168906
YIL093C	RSM25	1.24099	1.29961	0.954892	24.2394	28.4299	1.17288	4.82934	0.230055	-0.0665908
YMR081C	ISF1	0.678106	0.601201	1.12792	12.3235	14.4493	1.1725	3.85293	0.229591	0.173663
YPL048W	CAM1	0.82848	0.636943	1.30071	22.398	26.2606	1.17246	4.71483	0.229534	0.379302
YOR256C	TRE2	0.909675	0.890556	1.02147	8.68914	10.1863	1.1723	3.34856	0.229342	0.0306449
YER039C	HVG1	0.975714	1.07213	0.910073	19.7835	23.1909	1.17223	4.53549	0.22926	-0.135945
YPL097W	MSY1	1.34418	1.40212	0.958677	14.2921	16.7509	1.17204	4.06617	0.229018	-0.0608839
YKL029C	MAE1	0.580893	0.527602	1.101	25.9079	30.3557	1.17168	4.9239	0.228575	0.138821
YKL033W	YKL033W	0.806739	0.70754	1.1402	10.1479	11.8883	1.1715	3.57148	0.22836	0.189289
YDR463W	STP1	0.920103	0.833305	1.10416	20.5407	24.0335	1.17004	4.58698	0.226563	0.142951
YAL067W-A	YAL067W-A	0.931107	0.959173	0.970739	3.05605	3.57553	1.16999	1.83816	0.226492	-0.0428443
YLR001C	YLR001C	0.889341	0.894202	0.994563	15.8027	18.4719	1.16891	4.20726	0.225163	-0.00786501
YDR529C	QCR7	1.06424	0.955251	1.11409	32.1938	37.6306	1.16888	5.23383	0.225124	0.155867
YOL094C	RFC4	0.84475	0.757626	1.115	14.3948	16.8164	1.16823	4.0718	0.224321	0.157039
YKR098C	UBP11	0.532454	0.486669	1.09408	8.44116	9.86037	1.16813	3.30164	0.224201	0.129716
YMR113W	FOL3	0.981754	0.921223	1.06571	10.1247	11.8255	1.16799	3.56383	0.224026	0.0918113
YGL160W	YGL160W	1.1466	0.992051	1.15578	10.23	11.9432	1.16747	3.57811	0.223384	0.208872
YKR070W	YKR070W	1.0133	0.943943	1.07348	12.6033	14.7083	1.16702	3.87856	0.222824	0.10229
YJR033C	RAV1	1.07201	1.11136	0.964589	12.9408	15.0961	1.16655	3.91611	0.22225	-0.0520137
YHR190W	ERG9	1.22594	1.1954	1.02555	24.3775	28.4371	1.16653	4.8297	0.222222	0.0363938
YMR302C	YME2	1.0026	0.957843	1.04673	13.7485	16.034	1.16624	4.00306	0.221867	0.0658842
YBR019C	GAL10	0.703363	0.655048	1.07376	9.54954	11.1289	1.16538	3.47624	0.220805	0.102669
YDL233W	YDL233W	0.992977	1.00689	0.986178	8.24486	9.60764	1.16529	3.26418	0.220686	-0.0200799
YKR042W	UTH1	0.259526	0.180856	1.43499	161.881	188.629	1.16523	7.55941	0.220612	0.521038
YDR086C	SSS1	0.823147	0.84431	0.974936	44.5401	51.8756	1.16469	5.69698	0.21995	-0.0366212
YGL179C	TOS3	0.984105	0.906847	1.08519	14.1591	16.4907	1.16467	4.04358	0.219918	0.117953
YPR147C	YPR147C	1.13859	0.975112	1.16765	11.5248	13.4165	1.16415	3.74594	0.219276	0.223608
YCL021W-A	YCL021W-A	0.509987	0.503865	1.01215	7.95741	9.2636	1.16415	3.21157	0.219273	0.017424
YMR265C	YMR265C	0.678757	0.632194	1.07365	10.9588	12.7546	1.16386	3.67294	0.218917	0.102528
YNL133C	FYV6	0.671106	0.653765	1.02652	16.6224	19.3449	1.16379	4.27388	0.218826	0.0377683
YMR193W	MRPL24	0.969757	0.903662	1.07314	16.9542	19.7257	1.16347	4.30201	0.218437	0.10184
YCL049C	YCL049C	1.22348	1.06318	1.15078	13.8458	16.0953	1.16247	4.00857	0.217189	0.20261
YDR388W	RVS167	1.16307	1.06717	1.08987	17.8423	20.7401	1.16241	4.37435	0.217124	0.124152
YBR161W	CSH1	0.393073	0.379616	1.03545	22.0355	25.6029	1.1619	4.67824	0.21648	0.0502547
YJL134W	LCB3	0.984941	0.902259	1.09164	19.6295	22.8046	1.16175	4.51125	0.216297	0.126495
YPR006C	ICL2	1.11099	1.09499	1.01462	11.6818	13.5679	1.16146	3.76213	0.215941	0.0209378
YGL243W	TAD1	0.739112	0.72159	1.02428	11.3745	13.2105	1.16142	3.72361	0.215885	0.0346132
YPL150W	YPL150W	1.14878	1.07163	1.07199	10.6211	12.3334	1.16122	3.6245	0.215636	0.100296
YGL108C	YGL108C	0.918921	0.805383	1.14097	24.488	28.4312	1.16102	4.8294	0.215398	0.190266
YLR241W	YLR241W	1.02117	0.981141	1.04079	15.6312	18.1408	1.16055	4.18116	0.214808	0.057684
YPL103C	FMP30	0.878263	0.841135	1.04414	11.1241	12.9098	1.16053	3.6904	0.214779	0.0623154
YPR186C	PZF1	0.940542	0.93499	1.00594	11.4362	13.2714	1.16047	3.73025	0.214705	0.0085416
YGR001C	YGR001C	0.796637	0.761343	1.04636	17.9019	20.7726	1.16036	4.37661	0.214569	0.0653746
YDR068W	DOS2	1.12855	1.01611	1.11065	14.5143	16.8375	1.16007	4.07361	0.214209	0.151409
YER057C	HMF1	1.23599	1.03325	1.19621	24.5521	28.4735	1.15972	4.83155	0.213771	0.258472
YPR116W	YPR116W	0.917659	0.778172	1.17925	11.8146	13.6973	1.15935	3.77582	0.213319	0.237869
YNL041C	COG6	1.01994	1.0318	0.988505	13.0203	15.0891	1.15889	3.91543	0.212737	-0.0166792
YPL083C	SEN54	0.718936	0.647077	1.11105	15.5786	18.0476	1.15849	4.17374	0.212242	0.151926
YLR370C	ARC18	0.934312	0.931254	1.00328	21.9794	25.4576	1.15825	4.67002	0.211942	0.00473088
YGR143W	SKN1	0.572232	0.517699	1.10534	22.1384	25.6286	1.15765	4.67968	0.211202	0.144489
YPR159W	KRE6	0.304675	0.266125	1.14486	29.8865	34.5902	1.15739	5.11229	0.210869	0.19517
YDL218W	YDL218W	0.870008	0.871847	0.997891	7.80021	9.02434	1.15694	3.17382	0.210308	-0.0030458
YNL003C	PET8	0.779743	0.642926	1.2128	22.8706	26.4569	1.15681	4.72557	0.210147	0.278346
YNL157W	IGO1	1.08831	0.959094	1.13473	31.4803	36.4021	1.15634	5.18595	0.20957	0.182346
YAL030W	SNC1	1.21118	1.06074	1.14183	19.6123	22.6775	1.15629	4.50319	0.209504	0.191351
YBR221C	PDB1	0.838924	0.727735	1.15279	24.3161	28.1158	1.15626	4.81331	0.209469	0.205127
YGR117C	YGR117C	0.494461	0.486245	1.0169	15.5389	17.9662	1.1562	4.16721	0.209394	0.0241737
YKR071C	DRE2	0.669649	0.641855	1.0433	19.0764	22.0508	1.15592	4.46276	0.209045	0.061157
YHR120W	MSH1	0.966183	1.01045	0.956188	10.0963	11.669	1.15577	3.54461	0.208852	-0.0646331
YMR255W	GFD1	1.03465	0.938231	1.10277	15.726	18.1756	1.15576	4.18393	0.208848	0.141133
YDL134C	PPH21	0.569841	0.491217	1.16006	25.0774	28.9803	1.15563	4.857	0.208684	0.214199
YDR301W	CFT1	1.3368	1.28078	1.04374	13.8401	15.9872	1.15514	3.99884	0.208062	0.0617611
YPR008W	HAA1	0.576624	0.552739	1.04321	21.6643	25.0182	1.15481	4.6449	0.207655	0.0610319
YCR071C	IMG2	0.996992	0.938658	1.06215	27.9838	32.3145	1.15476	5.01411	0.207592	0.0869827
YNL009W	IDP3	0.840469	0.751987	1.11766	11.5407	13.3253	1.15464	3.7361	0.207439	0.160487
YNR007C	ATG3	1.11637	1.00308	1.11294	8.77512	10.1302	1.15442	3.34059	0.207167	0.15438
YGL155W	CDC43	0.69812	0.736704	0.947625	12.5424	14.4782	1.15434	3.85581	0.207072	-0.0776113
YGR257C	MTM1	0.975686	0.840807	1.16042	15.0199	17.3371	1.15428	4.11579	0.206993	0.214642
YIL050W	PCL7	0.768686	0.32778	2.34513	26.7831	30.9143	1.15425	4.9502	0.206953	1.22967
YGR256W	GND2	0.524837	0.450346	1.16541	7.33125	8.45958	1.15391	3.08059	0.206529	0.220837
YKR057W	RPS21A	0.534909	0.549361	0.973694	67.5651	77.9627	1.15389	6.28471	0.206507	-0.0384597
YBR244W	GPX2	1.12266	1.07881	1.04064	25.5246	29.4486	1.15373	4.88013	0.206311	0.0574748
YDL200C	MGT1	0.930777	0.975251	0.954398	11.5338	13.3068	1.15372	3.73409	0.20629	-0.0673376
YNR024W	YNR024W	0.896448	0.896527	0.999911	17.6151	20.32	1.15355	4.34483	0.206085	-0.000127804
YCR061W	YCR061W	0.857683	0.943228	0.909306	14.4604	16.6808	1.15355	4.06012	0.206082	-0.137162
YBR158W	AMN1	0.336847	0.338915	0.9939	94.4954	108.995	1.15344	6.76812	0.205945	-0.00882752
YGL178W	MPT5	0.801493	0.689749	1.16201	22.5848	26.043	1.15312	4.70282	0.205542	0.216618
YGR119C	NUP57	0.88083	0.769884	1.14411	26.5345	30.5899	1.15283	4.93498	0.205184	0.194223
YIR024C	YIR024C	1.40143	1.29598	1.08137	11.6507	13.4309	1.1528	3.74748	0.205139	0.112861
YNL005C	MRP7	1.12419	1.01487	1.10772	24.1284	27.814	1.15275	4.79774	0.205079	0.147594
YCR054C	CTR86	0.722008	0.68317	1.05685	14.7136	16.9602	1.15268	4.08408	0.204998	0.0797698
YML068W	ITT1	0.717136	0.656663	1.09209	13.0636	15.0577	1.15265	3.91243	0.204957	0.127093
YNL278W	CAF120	0.732886	0.567359	1.29175	13.0786	15.0691	1.1522	3.91352	0.204391	0.369327
YPR023C	EAF3	1.12212	1.03673	1.08237	13.5159	15.5697	1.15196	3.96067	0.204088	0.114188
YGL205W	POX1	0.587948	0.575801	1.0211	7.55897	8.70324	1.15138	3.12155	0.203362	0.0301182
YKL121W	YKL121W	1.03959	0.965345	1.07691	9.49887	10.9337	1.15105	3.4507	0.202949	0.106901
YNL315C	ATP11	1.27519	1.13805	1.1205	13.0102	14.9752	1.15103	3.9045	0.202923	0.164147
YDR020C	YDR020C	0.872916	0.694642	1.25664	14.715	16.9364	1.15096	4.08206	0.20284	0.329573
YGL228W	SHE10	0.9443	0.8885	1.0628	14.4257	16.5946	1.15035	4.05264	0.202074	0.0878726
YER054C	GIP2	0.870814	0.837282	1.04005	14.7228	16.931	1.14998	4.08159	0.201615	0.0566525
YMR165C	PAH1	1.02425	1.05658	0.969398	16.3941	18.8511	1.14987	4.23658	0.201474	-0.0448389
YPR091C	YPR091C	0.816932	0.804826	1.01504	15.831	18.2003	1.14966	4.18589	0.201207	0.021539
YDR197W	CBS2	0.999777	0.957989	1.04362	14.2619	16.3962	1.14965	4.03529	0.201198	0.0615969
YOR161C	PNS1	0.558142	0.474141	1.17717	23.2635	26.7357	1.14926	4.74069	0.2007	0.235318
YDR106W	ARP10	0.993685	0.997738	0.995938	16.6447	19.1045	1.14778	4.25584	0.198847	-0.00587255
YOR054C	VHS3	0.800758	0.735267	1.08907	17.4705	20.0521	1.14777	4.32568	0.19883	0.123099
YIL010W	DOT5	0.855486	0.83177	1.02851	16.9936	19.4961	1.14726	4.28511	0.198193	0.0405601
YGL057C	YGL057C	0.795851	0.676704	1.17607	16.8278	19.3025	1.14706	4.27072	0.197945	0.233973
YBR254C	TRS20	0.953878	0.840949	1.13429	23.08	26.4718	1.14696	4.72639	0.197815	0.181787
YDR539W	YDR539W	0.817438	0.789903	1.03486	10.5216	12.0654	1.14672	3.59281	0.197519	0.0494344
YOR352W	YOR352W	0.863607	0.881949	0.979203	9.14064	10.4762	1.14611	3.38904	0.196742	-0.0303205
YJR151C	DAN4	0.872971	0.831343	1.05007	7.05012	8.0796	1.14602	3.01428	0.196636	0.0704909
YGL140C	YGL140C	1.07438	1.02626	1.04689	12.591	14.4245	1.14562	3.85044	0.196127	0.066104
YDL090C	RAM1	1.20428	1.12883	1.06683	9.97106	11.4226	1.14558	3.51382	0.196078	0.0933333
YNR047W	YNR047W	1.29953	1.17825	1.10293	17.1143	19.6035	1.14545	4.29304	0.195915	0.141341
YMR090W	YMR090W	1.29401	1.21498	1.06504	16.9445	19.4064	1.14529	4.27846	0.195715	0.0909126
YGR061C	ADE6	0.872752	0.822393	1.06123	20.6138	23.6045	1.14508	4.56099	0.195452	0.0857432
YKR030W	GMH1	0.858717	0.824094	1.04201	16.4566	18.8391	1.14478	4.23566	0.195066	0.0593737
YHR044C	DOG1	1.01146	1.01139	1.00007	8.183	9.36434	1.14437	3.22718	0.194548	9.47051e-05
YDR179W-A	YDR179W-A	0.908906	0.861881	1.05456	11.2699	12.8963	1.14431	3.68888	0.194474	0.0766432
YKL041W	VPS24	0.633407	0.587869	1.07746	23.5422	26.9387	1.14427	4.75161	0.194427	0.107638
YMR313C	TGL3	0.815245	0.746237	1.09247	16.6128	19.0063	1.14408	4.24841	0.19419	0.127599
YPL100W	ATG21	0.774475	0.774643	0.999783	16.0442	18.3524	1.14387	4.1979	0.19392	-0.000312689
YJL101C	GSH1	1.02859	0.940411	1.09376	15.9593	18.2539	1.14378	4.19013	0.193808	0.1293
YOR104W	PIN2	0.771286	0.807556	0.955086	18.1387	20.7466	1.14378	4.37481	0.193804	-0.0662978
YMR106C	YKU80	0.931619	0.893999	1.04208	13.4513	15.3799	1.14338	3.94297	0.193299	0.0594673
YOR142W	LSC1	0.974758	0.872306	1.11745	26.3158	30.0822	1.14312	4.91084	0.192982	0.16021
YDR259C	YAP6	0.207954	0.125291	1.65977	7.85003	8.97322	1.14308	3.16563	0.192927	0.730988
YLR099C	ICT1	1.26572	1.29378	0.978314	16.0553	18.3524	1.14307	4.1979	0.192917	-0.0316304
YOR289W	YOR289W	0.819002	0.760976	1.07625	25.1384	28.7186	1.14242	4.84391	0.192095	0.106017
YDR405W	MRP20	0.90883	0.823049	1.10422	23.6008	26.9546	1.14211	4.75246	0.191699	0.143032
YNL316C	PHA2	0.673281	0.646716	1.04108	16.3972	18.7267	1.14207	4.22703	0.191648	0.0580767
YJL059W	YHC3	0.655342	0.556805	1.17697	14.6942	16.7798	1.14193	4.06865	0.191477	0.235075
YBR225W	YBR225W	1.15864	1.13003	1.02532	12.044	13.7504	1.14167	3.7814	0.191151	0.0360789
YOR329C	SCD5	0.880784	0.79945	1.10174	15.1918	17.3411	1.14147	4.11612	0.190899	0.13978
YFR022W	ROG3	0.899064	0.661944	1.35822	12.4475	14.2079	1.14142	3.82862	0.190833	0.441714
YGR258C	RAD2	0.81025	0.878482	0.92233	9.46083	10.7969	1.14122	3.43254	0.190573	-0.116644
YJL056C	ZAP1	1.15162	1.08189	1.06446	16.4868	18.8109	1.14097	4.23349	0.190256	0.0901159
YLR350W	ORM2	0.888519	0.689154	1.28929	36.6911	41.8431	1.14041	5.38692	0.189557	0.366575
YOR086C	TCB1	0.848526	0.702783	1.20738	22.9564	26.1791	1.14038	4.71034	0.189515	0.271879
YJL184W	GON7	1.11568	1.04281	1.06987	18.9918	21.6571	1.14034	4.43677	0.189462	0.0974402
YGL095C	VPS45	0.88823	0.816891	1.08733	12.8918	14.7004	1.14029	3.87778	0.189404	0.12079
YPR171W	BSP1	0.92454	0.868891	1.06405	18.3033	20.8648	1.13995	4.383	0.188967	0.0895605
YBL059C-A	YBL059C-A	1.20285	1.13159	1.06298	13.4488	15.3269	1.13964	3.93799	0.188583	0.0881141
YMR206W	YMR206W	0.45995	0.457502	1.00535	6.9007	7.86353	1.13953	2.97518	0.188434	0.00769856
YFR048W	RMD8	0.926096	0.96566	0.959029	13.2481	15.0964	1.13952	3.91614	0.188426	-0.0603537
YDL188C	PPH22	0.867602	0.820098	1.05792	17.3147	19.7294	1.13946	4.30228	0.18835	0.0812356
YAL009W	SPO7	1.36161	1.32078	1.03091	11.5289	13.1283	1.13873	3.71461	0.187425	0.0439208
YDR376W	ARH1	1.01667	0.937523	1.08442	13.2775	15.1192	1.13871	3.91831	0.187402	0.116929
YPL266W	DIM1	0.684056	0.768152	0.890521	15.4756	17.6208	1.13862	4.13921	0.187285	-0.167278
YBR284W	YBR284W	0.777747	0.732976	1.06108	7.87921	8.96249	1.13749	3.1639	0.185849	0.0855342
YPL157W	TGS1	0.910518	0.908346	1.00239	20.3743	23.1728	1.13735	4.53436	0.185679	0.00344644
YJR010W	MET3	0.62928	0.611729	1.02869	17.1414	19.4936	1.13723	4.28493	0.18552	0.0408109
YGL227W	VID30	0.938878	0.897099	1.04657	12.4652	14.1754	1.13719	3.82531	0.185478	0.0656712
YDR468C	TLG1	0.898805	0.857867	1.04772	22.6466	25.748	1.13695	4.68639	0.185165	0.0672544
YPL091W	GLR1	0.855687	0.672951	1.27154	22.6192	25.7136	1.1368	4.68446	0.184982	0.346582
YMR231W	PEP5	0.664249	0.671637	0.989001	12.5304	14.242	1.1366	3.83208	0.18472	-0.015956
YCR073W-A	SOL2	0.93575	0.915326	1.02231	10.9351	12.4262	1.13635	3.63531	0.184412	0.0318371
YPL213W	LEA1	0.80544	0.806624	0.998531	16.1855	18.3925	1.13635	4.20105	0.184411	-0.0021204
YML083C	YML083C	0.851713	0.88298	0.964589	8.50689	9.66645	1.13631	3.27299	0.184355	-0.0520138
YJL205C	NCE101	0.885878	0.907036	0.976674	10.5248	11.958	1.13617	3.5799	0.184174	-0.0340512
YGL260W	YGL260W	0.661696	0.677184	0.977129	1.87165	2.12648	1.13615	1.08847	0.184153	-0.0333789
YGR194C	XKS1	1.14727	1.0489	1.09378	16.2409	18.452	1.13614	4.2057	0.184143	0.129317
YJR040W	GEF1	0.902751	0.844362	1.06915	11.4284	12.9812	1.13587	3.69835	0.183792	0.0964679
YNL020C	ARK1	1.16599	0.967703	1.20491	25.6846	29.1614	1.13537	4.86599	0.183157	0.268922
YPL045W	VPS16	0.918935	0.957056	0.960168	10.3084	11.7038	1.13536	3.5489	0.183151	-0.058641
YLR035C	MLH2	1.26286	1.29095	0.97824	9.35964	10.626	1.1353	3.40953	0.18308	-0.0317399
YNL326C	PFA3	0.819895	0.842741	0.972891	22.9297	26.0277	1.13511	4.70198	0.18283	-0.0396498
YDR435C	PPM1	1.28117	1.24788	1.02668	10.9428	12.4205	1.13505	3.63466	0.182752	0.03798
YDR135C	YCF1	1.03635	0.9732	1.06489	24.0393	27.2756	1.13462	4.76954	0.182214	0.0906978
YAL020C	ATS1	1.44928	1.48805	0.973945	7.3605	8.3513	1.13461	3.062	0.182197	-0.0380873
YKL157W	APE2	1.23752	1.27055	0.974008	16.8735	19.1412	1.13439	4.25861	0.181922	-0.0379945
YDR237W	MRPL7	1.11601	1.05006	1.06281	14.3359	16.2485	1.13341	4.02223	0.180671	0.0878793
YLR037C	DAN2	1.19766	1.20488	0.994003	6.49298	7.35861	1.13332	2.87943	0.180553	-0.00867719
YCR068W	ATG15	0.747613	0.638046	1.17172	11.56	13.0985	1.13308	3.71133	0.180253	0.228631
YMR219W	ESC1	0.882739	0.851975	1.03611	10.9127	12.3646	1.13305	3.62815	0.180208	0.0511751
YER028C	MIG3	0.460844	0.306415	1.50399	14.5385	16.4664	1.13261	4.04146	0.179647	0.588791
YPL120W	VPS30	0.936246	0.87818	1.06612	9.97131	11.2906	1.13231	3.49705	0.179266	0.0923714
YMR204C	INP1	0.603925	0.529853	1.1398	14.2129	16.0927	1.13226	4.00834	0.179206	0.188776
YKL064W	MNR2	0.852181	0.714124	1.19332	16.7141	18.9144	1.13164	4.24141	0.178417	0.254984
YBR152W	SPP381	0.758346	0.765721	0.990368	13.5898	15.3778	1.13157	3.94278	0.17833	-0.0139634
YNR063W	YNR063W	1.11421	1.04342	1.06784	4.97348	5.62783	1.13157	2.49258	0.178324	0.0947014
YDR368W	YPR1	0.939631	0.907954	1.03489	16.938	19.1661	1.13155	4.26049	0.178295	0.049475
YBR050C	REG2	1.05687	1.02482	1.03128	10.1773	11.5133	1.13128	3.52523	0.177953	0.0444307
YFR008W	FAR7	1.34647	1.10849	1.21469	10.0557	11.3757	1.13126	3.50788	0.177936	0.280593
YJL165C	HAL5	0.777601	0.573865	1.35503	21.1236	23.8912	1.13102	4.57841	0.177621	0.43832
YDR231C	COX20	1.0171	0.997058	1.0201	17.1303	19.373	1.13092	4.27598	0.177497	0.0287144
YOR099W	KTR1	0.51542	0.549426	0.938106	19.5497	22.1065	1.13078	4.4664	0.177323	-0.0921779
YLL009C	COX17	1.1658	1.00904	1.15535	28.3558	32.0569	1.13052	5.00256	0.176988	0.208335
YNL095C	YNL095C	1.21634	1.08137	1.12482	20.7147	23.4176	1.13048	4.54952	0.17694	0.16969
YKL212W	SAC1	1.0379	0.968201	1.07199	24.1926	27.3468	1.13038	4.7733	0.176802	0.100287
YOR194C	TOA1	0.992517	1.02135	0.971766	18.3324	20.702	1.12926	4.3717	0.175372	-0.0413192
YJR067C	YAE1	1.14567	1.13165	1.01239	11.2983	12.7581	1.1292	3.67334	0.175305	0.0177642
YPR183W	DPM1	0.987341	0.92826	1.06365	26.3426	29.7429	1.12908	4.89447	0.175143	0.0890193
YDR125C	ECM18	0.769988	0.669008	1.15094	11.5625	13.0515	1.12878	3.70615	0.174766	0.202813
YOR087W	YVC1	0.645541	0.536515	1.20321	11.5016	12.9825	1.12876	3.69849	0.174733	0.26689
YNL008C	ASI3	0.799535	0.702905	1.13747	17.9641	20.2747	1.12863	4.34161	0.174569	0.185833
YOL011W	PLB3	0.932107	0.765064	1.21834	50.2778	56.744	1.12861	5.8264	0.174546	0.284916
YPL137C	GIP3	0.77893	0.463388	1.68095	22.4564	25.3354	1.1282	4.66308	0.174026	0.749273
YIL137C	TMA108	0.959033	0.887627	1.08045	14.3453	16.1826	1.12808	4.01638	0.173872	0.111628
YHL048W	COS8	0.500487	0.486383	1.029	8.51839	9.60639	1.12772	3.26399	0.173414	0.0412386
YBL093C	ROX3	0.484707	0.425957	1.13793	20.5602	23.1796	1.1274	4.53479	0.173002	0.186407
YOR062C	YOR062C	0.470462	0.481867	0.976331	31.1383	35.1019	1.12729	5.13348	0.172859	-0.0345578
YLR330W	CHS5	0.96679	0.843484	1.14619	20.4449	23.0465	1.12725	4.52648	0.172808	0.196841
YPR191W	QCR2	0.801642	0.837822	0.956817	23.4921	26.4759	1.12701	4.72661	0.172501	-0.0636851
YMR087W	YMR087W	0.714637	0.591613	1.20795	22.6841	25.5464	1.12618	4.67505	0.171439	0.272556
YDL241W	YDL241W	0.493072	0.484066	1.0186	6.41973	7.22511	1.12545	2.85302	0.170506	0.0265945
YMR083W	ADH3	0.778534	0.68349	1.13906	28.0056	31.5189	1.12545	4.97815	0.170502	0.187838
YJL065C	DLS1	1.00664	1.04683	0.961608	24.9024	28.0263	1.12545	4.80871	0.170496	-0.056479
YER039C-A	YER039C-A	0.975714	1.07213	0.910073	17.9623	20.2118	1.12523	4.33712	0.170226	-0.135945
YKL217W	JEN1	0.658329	0.732254	0.899045	9.22717	10.3822	1.12517	3.37603	0.170146	-0.153535
YNL240C	NAR1	1.11169	1.04603	1.06276	19.4775	21.9075	1.12476	4.45335	0.169617	0.0878225
YJL047C	RTT101	1.10848	1.12889	0.981921	11.0578	12.433	1.12436	3.6361	0.169105	-0.0263208
YGR174C	CBP4	1.15953	1.07648	1.07716	15.1538	17.0344	1.1241	4.09038	0.16877	0.107227
YDR142C	PEX7	0.697376	0.631688	1.10399	13.1869	14.819	1.12377	3.88938	0.168348	0.142724
YBR036C	CSG2	1.00626	0.910186	1.10555	23.6005	26.5109	1.12332	4.72851	0.167768	0.144763
YIL009C-A	EST3	0.769034	0.680977	1.12931	20.1739	22.6569	1.12308	4.50188	0.167455	0.175441
YJR106W	ECM27	0.97672	0.966632	1.01044	11.1557	12.5243	1.12268	3.64665	0.166945	0.0149779
YNL159C	ASI2	0.982405	0.831777	1.18109	21.4556	24.0794	1.12229	4.58973	0.166445	0.240121
YLR077W	FMP25	0.874456	0.76932	1.13666	17.194	19.2874	1.12175	4.26958	0.16575	0.184801
YER059W	PCL6	0.735841	0.680099	1.08196	15.7332	17.6374	1.12103	4.14057	0.164831	0.113649
YDR076W	RAD55	0.510763	0.470055	1.0866	26.59	29.8064	1.12096	4.89755	0.16474	0.119826
YNL172W	APC1	0.721807	0.680294	1.06102	9.09955	10.1981	1.12072	3.35022	0.164429	0.0854533
YGR295C	COS6	0.731922	0.741398	0.987219	25.0704	28.0864	1.1203	4.8118	0.163887	-0.0185577
YNL213C	YNL213C	1.161	1.14827	1.01108	19.0728	21.3666	1.12026	4.41729	0.16384	0.015904
YOR226C	ISU2	0.771905	0.706232	1.09299	37.4832	41.9749	1.11983	5.39146	0.163285	0.128281
YMR031C	YMR031C	0.647268	0.653044	0.991155	24.2114	27.1113	1.11977	4.76082	0.163209	-0.012818
YBR180W	DTR1	0.747432	0.733808	1.01857	6.93244	7.76153	1.1196	2.95634	0.162977	0.0265401
YER047C	SAP1	0.624757	0.617303	1.01207	12.4533	13.9407	1.11943	3.80123	0.16277	0.0173156
YDR115W	YDR115W	0.886719	0.835783	1.06094	20.8048	23.2805	1.11899	4.54105	0.162203	0.0853475
YMR272C	SCS7	0.920134	0.833914	1.10339	23.0678	25.8106	1.11891	4.68989	0.162089	0.141945
YJL085W	EXO70	0.858465	0.88522	0.969776	13.1311	14.6901	1.11873	3.87677	0.161858	-0.0442764
YLR036C	YLR036C	0.897112	0.817908	1.09684	14.9616	16.7332	1.11841	4.06464	0.16145	0.133349
YOR186W	YOR186W	1.34186	1.26987	1.05669	20.353	22.7592	1.11823	4.50838	0.161211	0.0795474
YDR374W-A	YDR374W-A	0.706405	0.731133	0.966178	18.7542	20.9653	1.1179	4.38993	0.160786	-0.0496386
YDL210W	UGA4	1.13702	1.13029	1.00596	6.54294	7.30655	1.11671	2.86919	0.159252	0.00857273
YHL003C	LAG1	1.1008	0.994825	1.10652	20.9671	23.4062	1.11633	4.54882	0.158767	0.146033
YNL027W	CRZ1	1.13274	1.05546	1.07322	12.7249	14.2038	1.11622	3.82821	0.158619	0.101943
YIL035C	CKA1	0.893786	0.84229	1.06114	21.7329	24.2583	1.1162	4.60041	0.1586	0.0856118
YMR052W	FAR3	0.737933	0.582113	1.26768	15.1491	16.8987	1.11549	4.07884	0.157679	0.342191
YJL005W	CYR1	0.976686	0.93403	1.04567	17.9139	19.9822	1.11546	4.32065	0.157638	0.0644269
YFR023W	PES4	0.787519	0.783922	1.00459	4.64904	5.1858	1.11545	2.37457	0.157631	0.00660458
YML120C	NDI1	1.0953	0.870739	1.2579	30.7649	34.3075	1.11515	5.10045	0.157239	0.331015
YER096W	SHC1	0.826139	0.666732	1.23909	6.17103	6.88053	1.11497	2.78252	0.157009	0.309279
YGR017W	YGR017W	0.929958	0.778965	1.19384	26.9006	29.9863	1.11471	4.90623	0.156665	0.255607
YDR532C	YDR532C	1.06012	1.05671	1.00323	12.9753	14.4624	1.11461	3.85424	0.156543	0.00465576
YER137C	YER137C	0.551139	0.526135	1.04752	9.52376	10.6146	1.11454	3.40798	0.156452	0.0669825
YJL084C	ALY2	0.867933	0.865334	1.003	14.3707	16.0128	1.11427	4.00115	0.156095	0.00432549
YOR163W	DDP1	1.37628	1.40966	0.976322	18.4592	20.5658	1.11412	4.36217	0.155908	-0.034571
YPL214C	THI6	0.80544	0.806624	0.998531	15.6481	17.4322	1.11402	4.12368	0.15577	-0.0021204
YKR019C	IRS4	1.24102	1.14689	1.08207	8.89563	9.90927	1.11395	3.30878	0.155682	0.113791
YDR264C	AKR1	0.970605	0.97142	0.999161	17.7996	19.8203	1.11352	4.30891	0.155131	-0.00121022
YBR103W	SIF2	0.969824	0.953984	1.0166	13.2116	14.7099	1.11341	3.87872	0.154984	0.0237578
YBR199W	KTR4	0.907801	0.955179	0.950398	22.5293	25.0833	1.11336	4.64865	0.154925	-0.0733956
YLR091W	YLR091W	0.935993	0.949016	0.986278	21.5819	24.0224	1.11308	4.58631	0.154558	-0.0199339
YPR107C	YTH1	0.966619	0.927694	1.04196	25.4582	28.3365	1.11306	4.82459	0.15453	0.0592985
YPR042C	PUF2	0.647057	0.583237	1.10942	19.047	21.1902	1.11252	4.40533	0.153834	0.149809
YAL062W	GDH3	0.513936	0.488522	1.05202	16.0428	17.847	1.11246	4.15761	0.15375	0.0731643
YMR279C	YMR279C	0.778887	0.694016	1.12229	14.801	16.4639	1.11235	4.04124	0.153616	0.166445
YOR162C	YRR1	1.00141	0.953238	1.05053	11.0246	12.2604	1.1121	3.61594	0.153281	0.0711216
YKL213C	DOA1	1.0379	0.968201	1.07199	15.5303	17.2651	1.11171	4.10979	0.152781	0.100287
YPR020W	ATP20	0.907861	0.90378	1.00452	18.3061	20.331	1.11061	4.34561	0.151358	0.00649937
YHR166C	CDC23	1.03033	0.984705	1.04633	13.4394	14.9246	1.11051	3.89962	0.151229	0.0653374
YJR062C	NTA1	0.948009	0.988012	0.959511	14.2579	15.8329	1.11046	3.98485	0.151161	-0.0596283
YOR043W	WHI2	0.749919	0.625541	1.19883	31.9178	35.4377	1.11028	5.14721	0.150924	0.261631
YGL150C	INO80	1.22476	1.00333	1.22069	14.1119	15.6655	1.11009	3.96952	0.150678	0.287697
YER163C	YER163C	1.06585	1.02172	1.04319	19.6693	21.8328	1.11	4.44843	0.150554	0.0609993
YBR192W	RIM2	0.544226	0.534105	1.01895	17.7633	19.7165	1.10996	4.30133	0.150509	0.0270816
YKR051W	YKR051W	0.74879	0.713404	1.0496	15.4905	17.193	1.1099	4.10375	0.150434	0.0698422
YML098W	TAF13	1.10797	1.0521	1.05311	12.8869	14.3027	1.10987	3.83822	0.150388	0.0746521
YGR063C	SPT4	0.851027	0.825902	1.03042	36.8978	40.9468	1.10973	5.35568	0.150213	0.0432343
YHL009C	YAP3	0.477356	0.542984	0.879135	12.8016	14.199	1.10916	3.82772	0.149467	-0.185843
YGL236C	MTO1	0.843673	0.772302	1.09241	10.916	12.0974	1.10823	3.59663	0.148257	0.127517
YJL066C	MPM1	1.13344	1.09264	1.03734	24.8143	27.4968	1.1081	4.78119	0.148093	0.0528871
YDR518W	EUG1	0.827301	0.835486	0.990204	12.5641	13.9183	1.10778	3.79891	0.147672	-0.014203
YIL146C	ECM37	0.985153	0.960165	1.02603	11.1414	12.3396	1.10754	3.62523	0.147363	0.037066
YBL089W	AVT5	1.22765	0.978609	1.25448	17.3057	19.1574	1.107	4.25983	0.146649	0.32709
YPL260W	YPL260W	0.715584	0.665846	1.0747	21.8216	24.1495	1.10668	4.59392	0.146237	0.103932
YDR408C	ADE8	1.01498	0.928339	1.09333	29.5164	32.664	1.10664	5.02963	0.146187	0.128723
YJR019C	TES1	1.24751	1.19011	1.04823	14.3583	15.8876	1.10651	3.98983	0.14602	0.0679614
YLL015W	BPT1	0.81753	0.758748	1.07747	10.1625	11.2436	1.10638	3.49104	0.145847	0.107651
YER173W	RAD24	0.937992	0.972791	0.964228	13.1539	14.5496	1.10611	3.86291	0.14549	-0.0525545
YGL213C	SKI8	1.01475	1.04599	0.970132	14.2993	15.8164	1.1061	3.98335	0.145478	-0.0437477
YEL012W	UBC8	0.823326	0.727608	1.13155	14.0357	15.524	1.10604	3.95643	0.145402	0.178304
YPL221W	FLC1	0.53612	0.374772	1.43052	41.7917	46.2222	1.10601	5.53052	0.14537	0.516542
YDR104C	SPO71	0.913504	0.897679	1.01763	7.99949	8.84433	1.10561	3.14475	0.144843	0.0252125
YKR062W	TFA2	0.648535	0.700016	0.926457	18.7034	20.6755	1.10544	4.36985	0.144622	-0.110204
YGL187C	COX4	0.670482	0.567238	1.18201	23.2489	25.695	1.10521	4.68341	0.144321	0.241245
YBR080C	SEC18	0.85359	0.712076	1.19874	15.6356	17.2792	1.10512	4.11096	0.144201	0.261513
YHR179W	OYE2	0.790631	0.67405	1.17296	26.6393	29.4376	1.10505	4.87959	0.144106	0.230148
YJR064W	CCT5	1.06207	1.03555	1.02561	25.7314	28.4336	1.10502	4.82953	0.144072	0.0364769
YDR430C	CYM1	0.681552	0.727613	0.936696	15.5576	17.1875	1.10476	4.10328	0.143738	-0.0943477
YLR166C	SEC10	1.1086	1.04203	1.06389	11.8195	13.0543	1.10447	3.70645	0.143352	0.0893444
YLR147C	SMD3	1.13957	1.11779	1.01948	19.4799	21.5147	1.10446	4.42725	0.143341	0.0278384
YAR029W	YAR029W	0.964968	0.967746	0.997129	10.9819	12.1283	1.10439	3.60031	0.143252	-0.00414796
YHR113W	YHR113W	1.16095	1.0153	1.14345	17.3534	19.1635	1.10431	4.26029	0.143139	0.193398
YFL055W	AGP3	0.827619	0.780357	1.06056	6.56337	7.24775	1.10427	2.85753	0.143096	0.0848317
YLR081W	GAL2	0.859916	0.833158	1.03212	5.11065	5.64331	1.10422	2.49654	0.143034	0.0456058
YJL137C	GLG2	0.793878	0.686863	1.1558	18.2151	20.1119	1.10414	4.32998	0.142919	0.208896
YNR006W	VPS27	0.954573	0.787466	1.21221	12.791	14.1199	1.10389	3.81966	0.142595	0.277638
YOL092W	YOL092W	0.986125	0.925374	1.06565	18.8016	20.741	1.10315	4.37441	0.141628	0.0917341
YOR334W	MRS2	0.873633	0.839382	1.04081	13.5523	14.9468	1.10289	3.90176	0.141293	0.0577
YBR179C	FZO1	0.965221	0.895324	1.07807	11.9418	13.1703	1.10288	3.71922	0.14127	0.108449
YKL012W	PRP40	1.29337	1.23411	1.04802	12.9954	14.3253	1.10234	3.8405	0.140571	0.0676721
YDR305C	HNT2	0.876374	0.873533	1.00325	29.7047	32.7407	1.10221	5.03301	0.140396	0.00468299
YGR197C	SNG1	1.02349	0.92125	1.11098	12.5182	13.7966	1.10212	3.78625	0.140287	0.151833
YDR406W	PDR15	0.704511	0.662834	1.06288	13.5041	14.8827	1.10209	3.89557	0.140243	0.0879741
YHR140W	YHR140W	0.942174	0.900148	1.04669	19.2649	21.225	1.10175	4.4077	0.139796	0.0658315
YDL138W	RGT2	0.642397	0.496715	1.29329	18.7812	20.6899	1.10163	4.37086	0.139641	0.371048
YPR155C	NCA2	0.661442	0.70675	0.935892	13.2856	14.6277	1.10102	3.87063	0.138843	-0.0955866
YIL027C	KRE27	0.884488	0.845541	1.04606	15.6532	17.231	1.1008	4.10694	0.138546	0.064969
YBR237W	PRP5	0.81573	0.860877	0.947557	12.0915	13.3102	1.10079	3.73446	0.13854	-0.0777153
YGR230W	BNS1	0.945934	0.957688	0.987727	17.9984	19.8116	1.10074	4.30827	0.138476	-0.0178162
YMR175W-A	YMR175W-A	1.06371	0.870178	1.2224	7.02736	7.73411	1.10057	2.95123	0.138251	0.289718
YPR178W	PRP4	0.966452	0.953798	1.01327	11.3854	12.5287	1.10042	3.64716	0.138049	0.0190141
YEL064C	AVT2	0.673274	0.651168	1.03395	9.83964	10.8255	1.1002	3.43637	0.137763	0.048164
YCR079W	AUP1	1.2216	1.2394	0.985642	19.1862	21.1056	1.10004	4.39956	0.137555	-0.0208644
YIL092W	YIL092W	1.24099	1.29961	0.954892	12.8181	14.0961	1.09971	3.81723	0.13712	-0.0665908
YGL106W	MLC1	1.16976	1.05834	1.10527	29.0949	31.978	1.09909	4.99901	0.136314	0.144403
YOR245C	DGA1	0.925265	0.947734	0.976292	13.1324	14.4279	1.09864	3.85079	0.135725	-0.0346161
YDR404C	RPB7	0.90883	0.823049	1.10422	23.5056	25.8174	1.09835	4.69027	0.135339	0.143032
YLR130C	ZRT2	0.699917	0.614773	1.1385	46.8217	51.4222	1.09825	5.68432	0.135213	0.187131
YER182W	FMP10	1.06306	1.04013	1.02204	12.8551	14.1145	1.09797	3.81911	0.13484	0.0314553
YCR075C	ERS1	1.29433	1.29526	0.999281	13.7943	15.1437	1.09782	3.92064	0.134643	-0.00103787
YBR137W	YBR137W	0.886598	0.773226	1.14662	18.5309	20.3409	1.09768	4.34631	0.134451	0.197389
YLR426W	YLR426W	1.08902	1.01646	1.07139	15.6612	17.1858	1.09735	4.10315	0.134027	0.0994803
YAR015W	ADE1	1.25997	1.18933	1.05939	15.8118	17.3479	1.09715	4.11669	0.133755	0.0832395
YDR479C	PEX29	1.14865	1.04887	1.09513	21.8842	24.01	1.09714	4.58557	0.133747	0.131105
YER187W	YER187W	0.835433	0.833498	1.00232	6.02412	6.60819	1.09695	2.72425	0.133504	0.00334509
YPR083W	MDM36	1.32644	1.31051	1.01215	11.0185	12.0836	1.09667	3.59498	0.133123	0.0174267
YMR023C	MSS1	0.846094	0.847571	0.998258	9.13941	10.021	1.09647	3.32496	0.132861	-0.00251557
YNL116W	DMA2	0.985599	0.908456	1.08492	13.8219	15.1509	1.09615	3.92133	0.13245	0.117583
YBR290W	BSD2	0.785743	0.837305	0.938418	22.6117	24.7839	1.09606	4.63133	0.132332	-0.0916969
YDL105W	NSE4	1.01079	0.967333	1.04492	14.7567	16.1717	1.09588	4.0154	0.132095	0.063393
YCR032W	BPH1	1.1101	1.08881	1.01955	11.0321	12.0889	1.09579	3.59561	0.131971	0.0279364
YHR139C	SPS100	1.03361	0.918934	1.12479	7.87624	8.63063	1.09578	3.10947	0.13196	0.169657
YPR180W	AOS1	0.911649	0.863982	1.05517	13.243	14.5096	1.09564	3.85894	0.131775	0.0774778
YDR282C	YDR282C	1.19289	1.07364	1.11108	8.39552	9.19661	1.09542	3.2011	0.131483	0.15196
YMR240C	CUS1	0.490992	0.507419	0.967626	13.623	14.917	1.09498	3.89888	0.130908	-0.0474778
YLR361C-A	YLR361C-A	1.05838	1.02534	1.03223	10.7722	11.7926	1.09473	3.55981	0.130569	0.0457607
YOL097C	WRS1	0.788088	0.715123	1.10203	26.2076	28.6861	1.09457	4.84228	0.13037	0.140166
YGR223C	HSV2	0.923103	0.944488	0.977358	18.183	19.9026	1.09457	4.31489	0.130365	-0.0330416
YPR048W	TAH18	1.24406	1.04411	1.1915	11.1773	12.2327	1.09442	3.61267	0.130166	0.252778
YDR316W	OMS1	1.0074	1.04917	0.960194	10.7071	11.7133	1.09397	3.55008	0.129578	-0.0586016
YLL018C-A	COX19	1.0739	1.01867	1.05422	26.4312	28.9097	1.09377	4.85348	0.129313	0.0761725
YNR043W	MVD1	1.1086	1.1825	0.937503	21.0539	23.0279	1.09376	4.52531	0.129298	-0.0931044
YLR126C	YLR126C	0.831427	0.664594	1.25103	12.3817	13.5424	1.09375	3.75941	0.129279	0.323118
YML021C	UNG1	1.09633	1.03878	1.0554	17.7777	19.4397	1.09349	4.28093	0.128934	0.0777966
YHR074W	QNS1	0.96592	0.947902	1.01901	14.5343	15.8889	1.0932	3.98995	0.128555	0.0271663
YML019W	OST6	0.74521	0.696008	1.07069	12.0607	13.1845	1.09318	3.72077	0.128533	0.0985424
YLR025W	SNF7	1.26323	1.30742	0.966202	22.7885	24.91	1.0931	4.63865	0.128421	-0.0496035
YIL046W	MET30	0.989367	0.929732	1.06414	14.8872	16.2659	1.09261	4.02378	0.127779	0.0896913
YJR096W	YJR096W	1.02409	0.920269	1.11282	26.1017	28.5183	1.09258	4.83381	0.12774	0.154214
YAL043C	PTA1	1.41738	1.38161	1.02589	15.2433	16.647	1.09209	4.05719	0.127088	0.0368782
YBR081C	SPT7	0.831153	0.720882	1.15297	12.1643	13.2819	1.09188	3.73139	0.126815	0.205352
YMR257C	PET111	0.823835	0.741908	1.11043	13.0736	14.273	1.09174	3.83522	0.126634	0.151114
YDR437W	GPI19	0.641173	0.615541	1.04164	13.1969	14.4045	1.09151	3.84845	0.126325	0.0588578
YKL019W	RAM2	1.39349	1.17127	1.18973	14.4479	15.7665	1.09127	3.97879	0.126003	0.250631
YER087W	YER087W	0.834541	0.733031	1.13848	13.9259	15.1835	1.09031	3.92443	0.124734	0.18711
YGL167C	PMR1	1.02271	0.914933	1.1178	23.9165	26.0744	1.09023	4.70456	0.124632	0.16066
YDR285W	ZIP1	0.798747	0.692975	1.15263	7.69316	8.38592	1.09005	3.06797	0.124392	0.204934
YHR131C	YHR131C	0.998933	0.941231	1.0613	13.7919	15.0328	1.08997	3.91004	0.12429	0.0858385
YOR360C	PDE2	0.695834	0.700017	0.994023	22.1684	24.1624	1.08995	4.59469	0.124262	-0.00864858
YOR131C	YOR131C	0.959875	0.890121	1.07837	16.9228	18.4424	1.0898	4.20496	0.124064	0.108846
YHR090C	YNG2	0.968287	0.879843	1.10052	19.286	21.0178	1.0898	4.39354	0.124059	0.13819
YPL084W	BRO1	0.813441	0.777175	1.04666	19.0337	20.7396	1.08963	4.37432	0.123833	0.0657967
YOR213C	SAS5	0.889333	0.796744	1.11621	16.837	18.3421	1.08939	4.19709	0.123525	0.158607
YNL071W	LAT1	1.24432	1.20245	1.03482	25.7564	28.0577	1.08935	4.81033	0.123466	0.0493812
YER179W	DMC1	0.763259	0.760256	1.00395	8.17247	8.9025	1.08933	3.15421	0.123439	0.00568746
YPL189W	GUP2	0.520823	0.508746	1.02374	5.73397	6.24373	1.0889	2.64241	0.122874	0.0338474
YDR198C	RKM2	0.93983	0.926635	1.01424	10.2451	11.1534	1.08865	3.47941	0.122542	0.0203984
YIL138C	TPM2	0.732501	0.623404	1.175	23.4307	25.4998	1.08831	4.67241	0.122085	0.232664
YDR411C	DFM1	1.12368	1.09229	1.02874	22.7353	24.7346	1.08794	4.62846	0.121598	0.0408722
YDR148C	KGD2	1.04785	0.980001	1.06924	17.124	18.6273	1.08779	4.21935	0.121398	0.0965824
YOL081W	IRA2	1.23945	1.12312	1.10358	16.3682	17.8034	1.08768	4.15408	0.12126	0.142185
YOR042W	CUE5	0.634575	0.676705	0.937743	35.6074	38.7245	1.08754	5.27517	0.12107	-0.0927352
YJR084W	CSN12	1.06042	1.05948	1.00089	15.3165	16.6564	1.08748	4.05801	0.12099	0.00128432
YOR122C	PFY1	0.773842	0.732212	1.05685	44.0239	47.872	1.08741	5.58111	0.120895	0.0797773
YHR116W	COX23	1.19204	1.35244	0.881397	9.99	10.8621	1.0873	3.44123	0.120749	-0.182136
YML079W	YML079W	1.1579	1.1214	1.03255	23.3643	25.4022	1.08723	4.66688	0.120653	0.0462149
YOL135C	MED7	1.09732	1.03719	1.05798	16.7019	18.1551	1.08701	4.1823	0.120361	0.0813125
YMR291W	YMR291W	0.666244	0.635182	1.0489	33.8307	36.7719	1.08694	5.20053	0.120271	0.0688793
YPL152W	RRD2	1.00737	0.946919	1.06384	16.5016	17.9353	1.08688	4.16473	0.120191	0.0892869
YPR148C	YPR148C	1.04386	0.862522	1.21024	16.0308	17.4218	1.08677	4.12282	0.120041	0.275291
YGR080W	TWF1	0.961552	0.949921	1.01224	22.1085	24.0244	1.08666	4.58643	0.119896	0.017557
YDL029W	ARP2	0.824546	0.842279	0.978946	21.1411	22.9665	1.08634	4.52146	0.11948	-0.0306982
YDR469W	SDC1	0.898805	0.857867	1.04772	17.5188	19.0312	1.08633	4.25029	0.119457	0.0672544
YDR470C	UGO1	0.545156	0.463683	1.17571	14.8202	16.0975	1.08619	4.00877	0.119272	0.233529
YGR225W	AMA1	0.684086	0.629538	1.08665	4.70331	5.10846	1.08614	2.35289	0.119211	0.119885
YML025C	YML6	0.524313	0.492613	1.06435	20.4276	22.1862	1.08609	4.47159	0.119148	0.0899749
YKL008C	LAC1	0.625905	0.581333	1.07667	21.8967	23.7766	1.08585	4.57147	0.118827	0.10658
YBL091C	MAP2	0.893964	0.851126	1.05033	14.9205	16.2001	1.08577	4.01793	0.118713	0.0708436
YGL166W	CUP2	1.02271	0.914933	1.1178	12.7975	13.895	1.08576	3.79649	0.118702	0.16066
YPL220W	RPL1A	0.523239	0.542979	0.963646	71.6942	77.8225	1.08548	6.28212	0.118332	-0.0534246
YKL051W	SFK1	0.576575	0.432647	1.33267	34.9009	37.8797	1.08535	5.24335	0.118159	0.41432
YJR138W	IML1	1.02554	0.919925	1.11481	12.006	13.0302	1.08531	3.70379	0.118106	0.156795
YOR089C	VPS21	0.788264	0.710616	1.10927	30.6318	33.2446	1.0853	5.05505	0.118091	0.149609
YPR154W	PIN3	0.958565	0.918505	1.04361	21.5674	23.4042	1.08517	4.5487	0.117917	0.0615874
YDL044C	MTF2	0.966082	0.850028	1.13653	12.5982	13.6707	1.08513	3.77302	0.117874	0.184635
YHL026C	YHL026C	0.742464	0.684509	1.08467	23.9834	26.0146	1.08469	4.70125	0.117287	0.11725
YPR045C	MNI2	1.215	1.09884	1.10571	22.5717	24.4772	1.08442	4.61337	0.116923	0.144968
YMR263W	SAP30	1.09984	1.02268	1.07545	20.3171	22.0317	1.08439	4.46151	0.11689	0.104937
YIL039W	YIL039W	1.13676	1.09487	1.03825	11.8546	12.8543	1.08432	3.68418	0.116797	0.0541592
YGR127W	YGR127W	0.673728	0.646095	1.04277	25.4504	27.5882	1.084	4.78598	0.116365	0.0604186
YKL222C	YKL222C	0.600327	0.667439	0.899448	8.199	8.88436	1.08359	3.15127	0.115819	-0.152888
YFR036W	CDC26	0.76821	0.778024	0.987386	18.5952	20.1478	1.08349	4.33255	0.115689	-0.0183133
YBR282W	MRPL27	0.767798	0.764191	1.00472	19.7132	21.3589	1.08348	4.41677	0.115676	0.00679342
YHR008C	SOD2	0.911808	0.801385	1.13779	35.7647	38.7478	1.08341	5.27604	0.115577	0.186234
YGL143C	MRF1	1.08431	1.03873	1.04388	11.8614	12.8485	1.08322	3.68353	0.115328	0.0619587
YNL152W	YNL152W	1.35232	1.14714	1.17887	16.2484	17.5955	1.0829	4.13713	0.114903	0.237402
YFL005W	SEC4	0.81241	0.808291	1.0051	22.3933	24.2413	1.08252	4.5994	0.114399	0.00733419
YKR088C	TVP38	0.924918	0.815977	1.13351	14.9165	16.1465	1.08246	4.01315	0.114317	0.180797
YFL034C-A	RPL22B	0.613233	0.554797	1.10533	124.65	134.922	1.0824	7.07598	0.11424	0.144475
YKL135C	APL2	0.699834	0.660398	1.05972	17.9539	19.4276	1.08209	4.28004	0.113815	0.083678
YLR203C	MSS51	1.21899	1.16333	1.04784	17.9148	19.3792	1.08174	4.27643	0.113356	0.067425
YLR097C	HRT3	1.05115	0.978217	1.07456	15.1955	16.4313	1.08133	4.03837	0.112802	0.103749
YPL104W	MSD1	1.13401	1.13973	0.994976	12.824	13.8665	1.08129	3.79353	0.112757	-0.007266
YPR047W	MSF1	0.887169	0.807814	1.09823	11.5869	12.5282	1.08124	3.64711	0.112683	0.135186
YLR082C	SRL2	0.808105	0.741222	1.09023	12.1123	13.0949	1.08112	3.71093	0.112525	0.124637
YDR160W	SSY1	0.742141	0.76926	0.964746	10.4282	11.2718	1.0809	3.49465	0.112228	-0.0517784
YGR087C	PDC6	0.981706	0.864611	1.13543	8.48479	9.17042	1.08081	3.19699	0.112109	0.183239
YKL207W	YKL207W	1.27666	1.16893	1.09216	22.6257	24.453	1.08076	4.61194	0.112046	0.12718
YMR124W	YMR124W	0.807986	0.763768	1.0579	14.252	15.4006	1.0806	3.94492	0.111829	0.0811972
YIL031W	ULP2	0.614972	0.61968	0.992403	16.8501	18.208	1.08059	4.1865	0.111819	-0.0110025
YNL314W	DAL82	1.27519	1.13805	1.1205	12.9307	13.9727	1.08058	3.80454	0.11181	0.164147
YPR179C	HDA3	0.911649	0.863982	1.05517	10.2192	11.0426	1.08058	3.46501	0.111806	0.0774778
YOL036W	YOL036W	0.755145	0.673616	1.12103	20.639	22.3014	1.08055	4.47906	0.111764	0.164828
YMR188C	MRPS17	0.951555	0.778295	1.22261	21.2201	22.9262	1.0804	4.51892	0.111564	0.28997
YAR023C	YAR023C	1.07523	1.0343	1.03957	12.3046	13.2903	1.08011	3.73231	0.111183	0.0559856
YER048W-A	ISD11	0.707698	0.663287	1.06696	23.9678	25.8816	1.07985	4.69385	0.110831	0.0935004
YKL151C	YKL151C	1.08565	0.879776	1.23401	71.8537	77.5745	1.07962	6.27751	0.11052	0.303353
YML003W	YML003W	0.965421	0.828022	1.16594	10.4739	11.3047	1.07932	3.49885	0.11012	0.221488
YGR191W	HIP1	1.01737	0.837116	1.21532	21.8031	23.5254	1.07899	4.55615	0.109687	0.28134
YFL062W	COS4	0.59334	0.630125	0.941624	5.7342	6.18707	1.07898	2.62926	0.109664	-0.0867772
YJL157C	FAR1	0.499643	0.481873	1.03688	57.0555	61.5612	1.07897	5.94395	0.109655	0.0522457
YDR284C	DPP1	0.798747	0.692975	1.15263	24.0201	25.9154	1.07891	4.69574	0.109568	0.204934
YGL115W	SNF4	0.846096	0.841007	1.00605	20.8489	22.4923	1.07883	4.49136	0.109466	0.00870455
YGL231C	YGL231C	0.994873	0.911437	1.09154	16.4496	17.7416	1.07854	4.14906	0.109086	0.12637
YEL013W	VAC8	0.738882	0.703519	1.05027	25.2776	27.2587	1.07837	4.76865	0.108857	0.0707549
YGL082W	YGL082W	0.933177	0.780289	1.19594	17.5965	18.9726	1.0782	4.24584	0.108627	0.258142
YKR068C	BET3	0.847712	0.828749	1.02288	24.5465	26.4557	1.07778	4.72551	0.108062	0.0326381
YBR003W	COQ1	1.10523	0.981377	1.1262	20.096	21.6517	1.07741	4.43641	0.107571	0.171463
YKR005C	YKR005C	0.986875	1.05915	0.931763	6.19282	6.67164	1.07732	2.73804	0.107445	-0.101965
YOL095C	HMI1	0.800317	0.777801	1.02895	9.55237	10.2897	1.07719	3.36313	0.107269	0.0411701
YDR422C	SIP1	1.07465	1.03505	1.03827	17.6045	18.9486	1.07635	4.24402	0.106142	0.0541776
YHR150W	PEX28	0.62073	0.614797	1.00965	12.1353	13.0578	1.07602	3.70684	0.105702	0.0138555
YOR172W	YRM1	1.16189	1.02481	1.13376	14.9981	16.1325	1.07564	4.0119	0.105191	0.181114
YML087C	YML087C	0.526309	0.492235	1.06922	12.7652	13.7301	1.07559	3.77927	0.105122	0.0965643
YPR198W	SGE1	0.762509	0.743391	1.02572	11.1079	11.947	1.07554	3.57857	0.105057	0.0366321
YGR180C	RNR4	0.816814	0.739457	1.10461	16.9707	18.2511	1.07545	4.18991	0.10494	0.143541
YDR090C	YDR090C	0.806234	0.758962	1.06228	12.3705	13.3025	1.07534	3.73363	0.104798	0.0871704
YBR129C	OPY1	1.0938	0.982599	1.11317	13.4725	14.4814	1.07489	3.85613	0.104189	0.154671
YKR052C	MRS4	0.967027	0.759324	1.27354	22.6558	24.3484	1.07471	4.60576	0.103945	0.348841
YGL121C	GPG1	0.804962	0.639476	1.25878	30.1387	32.3834	1.07448	5.01718	0.103635	0.33203
YGR002C	SWC4	0.978476	0.930966	1.05103	16.0498	17.2431	1.07435	4.10794	0.103464	0.0718085
YBL007C	SLA1	1.04976	0.988613	1.06185	21.3651	22.9488	1.07413	4.52035	0.103166	0.0865787
YFL047W	RGD2	0.906112	0.940955	0.962971	16.2389	17.4396	1.07394	4.1243	0.102913	-0.0544362
YOL072W	THP1	1.15804	1.0945	1.05805	10.1697	10.9177	1.07355	3.44859	0.102384	0.0814078
YOR150W	MRPL23	1.15143	1.19746	0.961566	20.3822	21.876	1.07329	4.45128	0.10204	-0.056542
YOR097C	YOR097C	0.936984	0.822885	1.13866	26.5972	28.5411	1.07309	4.83497	0.101765	0.187335
YDR456W	NHX1	1.24641	1.15996	1.07452	14.7679	15.8459	1.073	3.98604	0.101644	0.103696
YDL160C	DHH1	0.846938	0.825521	1.02594	26.1873	28.0888	1.07261	4.81192	0.101129	0.0369507
YGL157W	YGL157W	0.770997	0.726545	1.06118	20.6793	22.169	1.07204	4.47047	0.100358	0.0856715
YMR237W	BCH1	0.943137	0.899139	1.04893	14.4015	15.4385	1.07201	3.94846	0.100319	0.0689235
YDR210W	YDR210W	0.950001	0.809474	1.1736	25.8314	27.6831	1.07168	4.79093	0.0998804	0.230945
YDL005C	MED2	0.920843	0.785545	1.17223	15.4952	16.6054	1.07165	4.05358	0.0998356	0.229261
YKR016W	FMP13	0.915283	0.88208	1.03764	19.6048	21.0047	1.07141	4.39264	0.0995098	0.0533072
YBL001C	ECM15	0.760178	0.684584	1.11042	84.8806	90.9048	1.07097	6.50629	0.0989228	0.151109
YCL051W	LRE1	1.20753	1.10912	1.08872	13.5279	14.4842	1.07069	3.85641	0.0985453	0.122632
YOR171C	LCB4	1.16189	1.02481	1.13376	12.8741	13.7788	1.07027	3.78438	0.0979807	0.181114
YIL076W	SEC28	1.08359	0.948166	1.14283	18.0677	19.3326	1.07001	4.27297	0.0976272	0.192608
YPL119C	DBP1	0.837048	0.79973	1.04666	8.84726	9.46454	1.06977	3.24253	0.0973025	0.0657987
YJR017C	ESS1	1.09849	1.02578	1.07088	52.312	55.9556	1.06965	5.80621	0.0971406	0.0987959
YDR058C	TGL2	0.516336	0.444232	1.16231	11.159	11.9336	1.06942	3.57696	0.0968256	0.216996
YKL075C	YKL075C	0.915495	0.857072	1.06817	15.6903	16.7727	1.06898	4.06804	0.0962385	0.095136
YDR423C	CAD1	1.16515	1.04585	1.11406	21.3701	22.8439	1.06897	4.51374	0.0962191	0.155827
YLR088W	GAA1	1.12397	1.08186	1.03892	10.7708	11.5124	1.06886	3.52512	0.0960722	0.0550887
YOL087C	YOL087C	1.14619	1.03704	1.10526	13.8686	14.8191	1.06854	3.88938	0.0956376	0.144382
YLR422W	YLR422W	0.84246	0.845423	0.996495	13.4665	14.3883	1.06845	3.84682	0.0955178	-0.00506515
YPL046C	ELC1	0.918935	0.957056	0.960168	25.1653	26.8862	1.06838	4.74879	0.0954288	-0.058641
YIR025W	MND2	1.40143	1.29598	1.08137	8.44382	9.01704	1.06789	3.17265	0.0947569	0.112861
YOR187W	TUF1	0.644152	0.533175	1.20815	28.3859	30.3104	1.0678	4.92174	0.0946369	0.272794
YNR036C	YNR036C	0.991408	0.988316	1.00313	29.4208	31.4075	1.06753	4.97304	0.0942759	0.0045062
YBL047C	EDE1	0.875957	0.868676	1.00838	23.7567	25.3504	1.06708	4.66394	0.0936719	0.0120409
YGL131C	SNT2	1.07045	1.05356	1.01603	11.6668	12.4478	1.06695	3.63782	0.0934883	0.0229434
YJL166W	QCR8	0.803691	0.738878	1.08772	29.8399	31.8323	1.06677	4.99242	0.0932475	0.121306
YDL175C	AIR2	0.901348	0.73222	1.23098	19.457	20.7545	1.06668	4.37535	0.0931336	0.299807
YOL033W	MSE1	0.953239	0.891396	1.06938	10.6068	11.3119	1.06648	3.49977	0.0928597	0.0967721
YBL057C	PTH2	0.914957	0.83562	1.09494	20.7578	22.1366	1.06642	4.46836	0.0927814	0.130856
YBR291C	CTP1	0.798434	0.750054	1.0645	17.478	18.6364	1.06628	4.22005	0.0925898	0.0901781
YOR279C	RFM1	0.649389	0.579295	1.121	11.7619	12.5373	1.06592	3.64815	0.0921027	0.164786
YKL140W	TGL1	0.530348	0.516189	1.02743	13.2763	14.1489	1.06572	3.82262	0.0918329	0.0390403
YGR175C	ERG1	0.673768	0.601216	1.12067	36.1245	38.4956	1.06564	5.26662	0.0917159	0.164368
YDR415C	YDR415C	1.05473	0.955071	1.10435	17.9539	19.1309	1.06556	4.25783	0.0916051	0.143198
YLR019W	PSR2	0.592246	0.535525	1.10592	16.5793	17.6659	1.06554	4.14289	0.091584	0.145242
YEL020W-A	TIM9	0.406747	0.383344	1.06105	43.6687	46.5224	1.06535	5.53985	0.0913252	0.0854924
YBR140C	IRA1	0.896961	0.866848	1.03474	15.241	16.236	1.06529	4.02113	0.0912405	0.0492663
YJR057W	CDC8	1.06515	1.031	1.03312	21.9519	23.379	1.06501	4.54714	0.0908673	0.0470118
YLR425W	TUS1	0.990561	0.968547	1.02273	10.7164	11.4126	1.06497	3.51256	0.0908153	0.0324234
YGR281W	YOR1	0.686842	0.685717	1.00164	17.8302	18.9871	1.06488	4.24695	0.0906958	0.00236469
YDR107C	YDR107C	0.926043	1.04062	0.889897	13.7851	14.678	1.06477	3.87559	0.0905473	-0.16829
YNR033W	ABZ1	1.19031	1.24172	0.958604	14.1881	15.1064	1.06472	3.91709	0.0904786	-0.0609937
YMR220W	ERG8	0.812658	0.796828	1.01987	18.3148	19.4923	1.06429	4.28483	0.0898947	0.0283812
YHR114W	BZZ1	0.760246	0.791279	0.960782	12.7001	13.5138	1.06407	3.75636	0.0895893	-0.0577189
YDR155C	CPR1	0.654484	0.591903	1.10573	117.288	124.771	1.0638	6.96314	0.0892284	0.144998
YCR020C-A	MAK31	0.888758	0.843766	1.05332	15.4599	16.4431	1.0636	4.03941	0.088956	0.0749478
YLR038C	COX12	1.04488	0.984918	1.06088	21.8797	23.2566	1.06293	4.53957	0.0880433	0.0852668
YKL042W	SPC42	0.624515	0.571534	1.0927	13.1579	13.9819	1.06263	3.80549	0.0876366	0.127898
YNR073C	YNR073C	0.656265	0.824663	0.795798	3.38248	3.59424	1.06261	1.84569	0.0876059	-0.329526
YLR446W	YLR446W	0.698641	0.675728	1.03391	20.9256	22.2338	1.06252	4.47468	0.0874858	0.0481084
YDR473C	PRP3	1.09944	0.962276	1.14254	11.0598	11.7504	1.06244	3.55464	0.0873861	0.192249
YDR494W	RSM28	1.04887	1.0093	1.03921	17.4179	18.5054	1.06244	4.20988	0.0873799	0.055492
YGL259W	YPS5	0.423002	0.39073	1.08259	4.91839	5.22187	1.0617	2.38457	0.0863826	0.114489
YGL242C	YGL242C	0.905568	0.859468	1.05364	13.9554	14.8151	1.0616	3.889	0.0862416	0.075379
YLR228C	ECM22	0.800635	0.677002	1.18262	7.7404	8.21711	1.06159	3.03863	0.0862235	0.241986
YBR127C	VMA2	1.08695	0.953369	1.14011	34.1233	36.2236	1.06155	5.17886	0.0861734	0.189176
YDR196C	YDR196C	0.999777	0.957989	1.04362	15.8004	16.7686	1.06128	4.06769	0.0858069	0.0615969
YLR032W	RAD5	0.905548	0.763071	1.18671	11.0438	11.7204	1.06127	3.55096	0.0857935	0.246973
YPR153W	YPR153W	1.09469	1.11643	0.980532	13.6403	14.4758	1.06126	3.85558	0.0857736	-0.0283631
YBR175W	SWD3	1.16701	1.07214	1.08849	15.4656	16.4119	1.06118	4.03667	0.0856741	0.122332
YKL087C	CYT2	0.804851	0.830501	0.969115	26.1118	27.708	1.06113	4.79223	0.085602	-0.0452606
YMR109W	MYO5	0.602578	0.548108	1.09938	23.1128	24.5255	1.06112	4.61621	0.0855916	0.136688
YJR066W	TOR1	1.12838	1.08395	1.04099	14.7835	15.685	1.06098	3.97131	0.0853927	0.0579613
YOR266W	PNT1	0.847587	0.865205	0.979637	10.4303	11.0662	1.06097	3.46809	0.0853784	-0.0296806
YLR138W	NHA1	1.07079	0.862214	1.24191	12.262	13.0096	1.06096	3.7015	0.085375	0.312563
YOR381W	FRE3	1.21877	1.03169	1.18133	7.78474	8.25854	1.06086	3.04589	0.0852373	0.240407
YAL018C	YAL018C	0.86636	0.892843	0.970339	4.36618	4.63097	1.06065	2.21132	0.0849455	-0.0434399
YLR262C	YPT6	0.898309	0.800695	1.12191	14.1318	14.9873	1.06054	3.90567	0.0848011	0.16596
YGR132C	PHB1	1.05341	1.00749	1.04558	22.6578	24.0292	1.06053	4.58672	0.0847831	0.0643082
YBL016W	FUS3	0.734702	0.609108	1.20619	21.113	22.3904	1.0605	4.48481	0.0847504	0.270459
YHR048W	YHR048W	0.975235	0.886588	1.09999	11.149	11.8218	1.06035	3.56338	0.0845433	0.137485
YHR191C	CTF8	1.1022	1.10249	0.99973	25.7516	27.3024	1.06022	4.77096	0.0843676	-0.000389765
YLR148W	PEP3	1.13957	1.11779	1.01948	12.781	13.5443	1.05972	3.75961	0.083683	0.0278384
YPL215W	CBP3	0.81204	0.78638	1.03263	23.3632	24.7576	1.05968	4.6298	0.083631	0.0463246
YER116C	SLX8	0.553112	0.495526	1.11621	13.5583	14.3612	1.05922	3.8441	0.0829956	0.158611
YJR086W	STE18	0.916556	0.828196	1.10669	49.5465	52.4617	1.05884	5.71319	0.0824825	0.14625
YER117W	RPL23B	0.553112	0.495526	1.11621	97.6891	103.427	1.05873	6.69246	0.0823383	0.158611
YMR288W	HSH155	1.26262	1.24824	1.01152	9.35981	9.90944	1.05872	3.3088	0.0823245	0.0165205
YBL049W	MOH1	0.880124	0.962556	0.914361	12.5326	13.2677	1.05866	3.72985	0.0822406	-0.129163
YDR495C	VPS3	0.669809	0.662325	1.0113	10.5956	11.2163	1.05858	3.48752	0.0821272	0.016209
YLR084C	RAX2	0.573763	0.563697	1.01786	22.8278	24.159	1.05831	4.59449	0.0817657	0.0255365
YDL015C	TSC13	0.51762	0.535067	0.967392	25.1323	26.5957	1.05823	4.73312	0.0816502	-0.047828
YJL045W	YJL045W	0.933211	0.817619	1.14138	6.76005	7.15245	1.05805	2.83844	0.0814046	0.190774
YDR483W	KRE2	0.966938	0.894544	1.08093	21.8772	23.1463	1.05801	4.53271	0.0813507	0.112271
YGL127C	SOH1	1.22416	1.17765	1.0395	19.8373	20.9794	1.05757	4.3909	0.0807586	0.0558841
YGL065C	ALG2	0.928827	0.817145	1.13667	17.201	18.1906	1.05754	4.18513	0.0807068	0.184818
YNL318C	HXT14	0.789819	0.760881	1.03803	4.37945	4.63116	1.05747	2.21137	0.0806222	0.0538514
YJL178C	ATG27	0.440837	0.378877	1.16354	19.1355	20.2333	1.05737	4.33866	0.0804781	0.218516
YGR154C	GTO1	0.725342	0.79919	0.907596	14.0263	14.8292	1.05724	3.89037	0.0803091	-0.139877
YPL196W	OXR1	0.866891	0.772779	1.12178	19.4186	20.5282	1.05714	4.35953	0.0801656	0.165794
YOR076C	SKI7	1.0438	0.990099	1.05424	12.4741	13.1853	1.05702	3.72086	0.080001	0.0762079
YPL178W	CBC2	0.746972	0.670384	1.11424	20.7976	21.9793	1.05682	4.45807	0.0797278	0.156065
YOR371C	GPB1	0.844233	0.753045	1.12109	16.6855	17.6333	1.0568	4.14023	0.0797065	0.164905
YPL038W-A	YPL038W-A	1.57391	1.5046	1.04606	10.691	11.2974	1.05672	3.49791	0.0795932	0.0649723
YDR477W	SNF1	1.17092	0.961876	1.21733	21.3808	22.592	1.05665	4.49774	0.0795018	0.283715
YOR155C	ISN1	0.753897	0.794179	0.949279	12.7583	13.4767	1.05631	3.7524	0.0790328	-0.0750955
YFR010W	UBP6	0.83867	0.738807	1.13517	22.2732	23.5249	1.05619	4.55611	0.0788738	0.182905
YOL044W	PEX15	0.886797	0.827369	1.07183	10.8152	11.4219	1.0561	3.51373	0.0787413	0.100073
YDL079C	MRK1	0.958293	0.927972	1.03267	14.1083	14.8988	1.05603	3.89713	0.0786516	0.0463854
YOR198C	BFR1	0.669189	0.634075	1.05538	27.9742	29.5402	1.05598	4.88461	0.0785823	0.0777589
YOL128C	YGK3	1.31491	1.3191	0.996825	15.2735	16.1266	1.05585	4.01137	0.0784035	-0.00458759
YDR286C	YDR286C	1.10203	1.07544	1.02473	15.6514	16.5239	1.05575	4.04648	0.0782617	0.0352427
YLR278C	YLR278C	0.558768	0.474055	1.1787	21.0922	22.265	1.0556	4.4767	0.0780685	0.237194
YNL181W	YNL181W	0.990556	0.973315	1.01771	12.3286	13.0076	1.05507	3.70128	0.0773436	0.0253311
YDL091C	UBX3	1.00606	0.969656	1.03754	14.7934	15.6075	1.05503	3.96417	0.0772837	0.0531735
YCR048W	ARE1	1.09336	1.03252	1.05892	10.5814	11.1613	1.05481	3.48043	0.0769793	0.0825924
YKL006C-A	SFT1	1.07428	0.932716	1.15177	32.7274	34.5162	1.05466	5.1092	0.076774	0.203856
YBR274W	CHK1	1.10492	0.992398	1.11339	9.26155	9.76765	1.05465	3.28801	0.0767579	0.154956
YKR101W	SIR1	0.899798	0.923783	0.974036	11.2029	11.8133	1.05448	3.56234	0.0765367	-0.0379528
YMR247C	RKR1	0.835096	0.768556	1.08658	13.006	13.713	1.05436	3.77747	0.0763689	0.119792
YLL050C	COF1	0.936399	0.886909	1.0558	46.2078	48.7117	1.05419	5.6062	0.0761336	0.0783364
YHR009C	YHR009C	0.897619	0.897735	0.99987	23.1122	24.3624	1.05409	4.60658	0.0760001	-0.000187183
YMR213W	CEF1	1.01976	1.05023	0.970984	10.6665	11.2403	1.0538	3.49061	0.0755969	-0.0424807
YOR158W	PET123	0.652022	0.735629	0.886346	25.397	26.7623	1.05376	4.74213	0.0755428	-0.174058
YNL264C	PDR17	0.748308	0.796254	0.939785	14.9761	15.7794	1.05364	3.97997	0.075382	-0.0895969
YFL048C	EMP47	0.906112	0.940955	0.962971	16.549	17.4337	1.05346	4.12381	0.075133	-0.0544362
YLR187W	SKG3	1.03793	0.965617	1.07489	10.9789	11.5532	1.05231	3.53022	0.0735607	0.104185
YGL206C	CHC1	0.587948	0.575801	1.0211	26.5993	27.9875	1.05219	4.80671	0.0733906	0.0301182
YKR046C	PET10	0.697621	0.6409	1.0885	21.7066	22.8369	1.05207	4.51329	0.0732293	0.122344
YPL206C	YPL206C	0.952156	0.894583	1.06436	15.2768	16.0721	1.05206	4.00648	0.0732171	0.0899829
YPL189C-A	YPL189C-A	0.520823	0.508746	1.02374	23.8346	25.0659	1.05166	4.64765	0.0726697	0.0338474
YCL028W	RNQ1	1.52832	1.40108	1.09082	13.0776	13.7515	1.05153	3.78152	0.0724919	0.125409
YGL019W	CKB1	1.14466	1.11289	1.02855	19.3185	20.3127	1.05146	4.34431	0.0723953	0.0406097
YKR003W	OSH6	0.909287	0.78533	1.15784	24.9209	26.1935	1.05107	4.71114	0.0718553	0.211437
YDL099W	BUG1	1.09497	1.14076	0.959867	14.8024	15.5537	1.05076	3.95919	0.0714282	-0.059094
YGR166W	KRE11	0.880688	0.824506	1.06814	13.2597	13.9326	1.05074	3.80039	0.0714114	0.0951005
YPL191C	YPL191C	0.980055	1.00563	0.974572	14.7084	15.454	1.05069	3.9499	0.0713372	-0.0371593
YPL036W	PMA2	0.830898	0.769117	1.08033	9.42794	9.90564	1.05067	3.30825	0.0713072	0.111467
YLR117C	CLF1	1.12955	1.15026	0.981997	16.2257	17.0469	1.05061	4.09144	0.071226	-0.0262097
YGL196W	YGL196W	0.88657	0.804174	1.10246	26.5998	27.9297	1.05	4.80373	0.0703864	0.140726
YER046W	SPO73	0.986058	0.890147	1.10775	19.8199	20.8098	1.04994	4.37919	0.0703107	0.147628
YOR377W	ATF1	1.01754	0.919492	1.10663	21.7791	22.8667	1.04994	4.51518	0.0703038	0.146178
YML024W	RPS17A	0.524313	0.492613	1.06435	95.2871	100.042	1.0499	6.64447	0.0702569	0.0899749
YOR249C	APC5	0.872627	0.848974	1.02786	12.1811	12.7889	1.0499	3.67682	0.0702492	0.0396449
YBL046W	PSY4	0.875957	0.868676	1.00838	11.5114	12.0851	1.04984	3.59515	0.0701633	0.0120409
YFR003C	YPI1	1.22752	1.04379	1.17602	26.8386	28.1688	1.04956	4.81603	0.0697897	0.233908
YFL034W	YFL034W	0.613233	0.554797	1.10533	10.3472	10.8564	1.04921	3.44048	0.0693079	0.144475
YNL160W	YGP1	0.504083	0.294912	1.70927	98.0237	102.84	1.04914	6.68426	0.0692047	0.773376
YNL268W	LYP1	0.686046	0.514823	1.33258	34.7372	36.4369	1.04893	5.18733	0.0689193	0.414227
YGR094W	VAS1	0.67435	0.53094	1.27011	30.7529	32.2515	1.04873	5.0113	0.0686447	0.34495
YDR319C	YDR319C	0.709197	0.702354	1.00974	21.4148	22.4562	1.04863	4.48904	0.0685101	0.0139875
YIL061C	SNP1	1.14608	1.07639	1.06475	10.0079	10.4942	1.04859	3.39152	0.0684529	0.0905174
YBR251W	MRPS5	0.881806	0.807897	1.09148	16.4651	17.257	1.0481	4.10911	0.0677718	0.126289
YIL166C	YIL166C	1.0374	1.01356	1.02351	9.73103	10.1985	1.04804	3.35028	0.0676888	0.0335318
YNR045W	PET494	0.835665	0.725588	1.15171	17.4865	18.3251	1.04796	4.19575	0.0675784	0.203773
YGL198W	YIP4	0.999026	0.99968	0.999346	33.4864	35.0882	1.04784	5.13291	0.0674127	-0.000943479
YDR363W	ESC2	0.993346	0.971099	1.02291	11.3978	11.9427	1.0478	3.57805	0.067366	0.0326772
YPR133C	SPN1	0.910231	0.89565	1.01628	22.6044	23.6809	1.04762	4.56565	0.0671171	0.0232984
YNL253W	TEX1	0.893707	0.767574	1.16433	10.0128	10.4875	1.04741	3.3906	0.0668282	0.219496
YCL047C	YCL047C	0.921718	0.868084	1.06178	9.99847	10.4697	1.04713	3.38815	0.0664403	0.0864909
YDR065W	YDR065W	0.897861	0.77906	1.15249	21.793	22.8168	1.04698	4.51202	0.0662288	0.204758
YOR356W	YOR356W	0.616797	0.632665	0.974919	14.2914	14.9619	1.04692	3.90322	0.0661463	-0.0366452
YHR198C	FMP22	1.01622	0.873911	1.16284	19.2942	20.1956	1.04672	4.33597	0.0658766	0.217658
YDR317W	HIM1	0.582222	0.561867	1.03623	11.0564	11.5697	1.04642	3.53227	0.0654657	0.0513403
YNL322C	KRE1	0.835967	0.773278	1.08107	28.8871	30.2275	1.0464	4.91779	0.065438	0.112459
YEL040W	UTR2	0.637611	0.65584	0.972205	84.7879	88.7197	1.04637	6.47118	0.0653965	-0.0406676
YER130C	YER130C	0.890157	0.731671	1.21661	28.3093	29.6188	1.04626	4.88844	0.0652405	0.282864
YEL023C	YEL023C	0.797277	0.751379	1.06108	10.4432	10.9254	1.04617	3.44962	0.0651237	0.0855393
YDL104C	QRI7	0.732639	0.68694	1.06653	16.2058	16.9536	1.04614	4.08352	0.0650801	0.0929188
YGR126W	YGR126W	0.981539	0.901834	1.08838	21.7606	22.7641	1.04612	4.50869	0.0650432	0.122184
YKL079W	SMY1	0.654586	0.571005	1.14638	12.3605	12.9294	1.04603	3.69259	0.0649219	0.19708
YLR053C	YLR053C	1.21068	0.979576	1.23592	19.3919	20.2829	1.04595	4.34219	0.0648136	0.305583
YDL133W	YDL133W	0.50568	0.452942	1.11644	21.3436	22.3225	1.04587	4.48043	0.0647	0.1589
YDL178W	DLD2	0.879415	0.764973	1.1496	16.9061	17.6737	1.0454	4.14353	0.0640612	0.201135
YAL055W	PEX22	0.809402	0.800464	1.01117	12.8002	13.3796	1.04527	3.74196	0.06387	0.0160203
YKL138C	MRPL31	1.02884	0.920006	1.11829	24.2376	25.3342	1.04524	4.66302	0.0638387	0.161299
YOR296W	YOR296W	0.938785	0.861885	1.08922	10.9305	11.421	1.04488	3.51362	0.0633308	0.1233
YDR026C	YDR026C	1.0617	0.8523	1.24569	16.2091	16.9364	1.04487	4.08206	0.0633283	0.316941
YLR180W	SAM1	0.973292	1.01259	0.96119	32.6083	34.0629	1.04461	5.09013	0.0629631	-0.0571065
YNL323W	LEM3	1.13664	1.01357	1.12142	16.6574	17.3993	1.04454	4.12096	0.0628636	0.16533
YHL029C	OCA5	0.531844	0.527285	1.00865	25.1506	26.2684	1.04444	4.71525	0.0627349	0.0124206
YMR086W	YMR086W	0.797291	0.74528	1.06979	26.0915	27.2455	1.04423	4.76795	0.0624386	0.0973239
YMR233W	YMR233W	0.790534	0.716877	1.10275	14.9579	15.6182	1.04414	3.96516	0.0623178	0.141101
YLR168C	YLR168C	0.809471	0.711752	1.13729	51.7025	53.9815	1.04408	5.75439	0.0622317	0.185605
YDL237W	YDL237W	1.0797	0.985053	1.09608	15.1737	15.8424	1.04406	3.98572	0.0622112	0.132353
YNL066W	SUN4	0.341028	0.325741	1.04693	70.8648	73.9754	1.04389	6.20897	0.0619762	0.0661637
YOR126C	IAH1	0.975209	0.870886	1.11979	18.3549	19.1437	1.04298	4.2588	0.0607057	0.163228
YDR028C	REG1	0.855144	0.784428	1.09015	18.3152	19.0968	1.04267	4.25526	0.0602875	0.124525
YNR052C	POP2	0.542955	0.517563	1.04906	19.7137	20.5487	1.04236	4.36097	0.0598467	0.0691
YGL244W	RTF1	0.801364	0.80465	0.995916	13.7966	14.3772	1.04208	3.84571	0.059469	-0.00590422
YBR203W	COS111	0.296633	0.263195	1.12705	8.73706	9.10275	1.04185	3.1863	0.0591544	0.172545
YLR447C	VMA6	1.11724	0.937087	1.19225	29.879	31.1217	1.04159	4.95985	0.0587874	0.253684
YIL062C	ARC15	1.01664	0.944231	1.07669	31.3174	32.6072	1.04118	5.02712	0.0582232	0.106601
YLR238W	FAR10	0.975088	0.886606	1.0998	11.7095	12.187	1.04078	3.60727	0.0576719	0.13724
YJR089W	BIR1	0.940903	0.911662	1.03207	9.48736	9.87396	1.04075	3.30363	0.0576208	0.0455461
YKL132C	RMA1	0.782772	0.74334	1.05305	7.52891	7.83498	1.04065	2.96993	0.057488	0.0745689
YNR064C	YNR064C	0.953634	1.0394	0.917482	5.9685	6.2095	1.04038	2.63448	0.0571078	-0.124248
YKR034W	DAL80	1.2533	1.23556	1.01436	3.7526	3.90376	1.04028	1.96486	0.0569716	0.0205682
YER007C-A	TMA20	0.932545	0.944633	0.987204	20.0514	20.8566	1.04016	4.38244	0.0568067	-0.0185803
YDL185W	TFP1	0.804798	0.760853	1.05776	36.5627	38.0262	1.04003	5.24892	0.0566234	0.0810096
YLR142W	PUT1	0.902079	0.780894	1.15519	7.7255	8.03331	1.03984	3.00599	0.0563662	0.208127
YDR055W	PST1	0.706026	0.579775	1.21776	50.6413	52.6581	1.03983	5.71858	0.0563411	0.284228
YJL196C	ELO1	0.53807	0.477792	1.12616	29.0499	30.2028	1.03969	4.91661	0.0561491	0.171413
YHR189W	PTH1	1.42952	1.42842	1.00077	18.2737	18.9963	1.03954	4.24764	0.0559482	0.00111142
YBR177C	EHT1	0.480831	0.512653	0.937927	29.5561	30.7185	1.03933	4.94103	0.0556509	-0.0924526
YLR457C	NBP1	1.22508	1.16897	1.048	10.9174	11.3462	1.03928	3.50413	0.055578	0.067632
YFR041C	ERJ5	1.025	0.963532	1.0638	15.1257	15.7185	1.0392	3.97439	0.0554678	0.0892203
YPR025C	CCL1	0.997686	0.913825	1.09177	15.3807	15.9835	1.03919	3.99851	0.0554632	0.126668
YLR268W	SEC22	0.927549	0.762878	1.21585	14.9156	15.4946	1.03882	3.95369	0.0549435	0.281971
YGR071C	YGR071C	0.927912	1.05024	0.883527	11.8836	12.3344	1.03793	3.62461	0.0537117	-0.178654
YBR058C	UBP14	0.926059	0.860446	1.07625	12.4968	12.97	1.03786	3.6971	0.0536148	0.106019
YMR207C	HFA1	1.05388	1.01753	1.03572	7.86185	8.15804	1.03767	3.02822	0.0533537	0.0506397
YLR403W	SFP1	0.729913	0.72363	1.00868	24.3251	25.2403	1.03762	4.65766	0.0532786	0.0124722
YLR034C	SMF3	1.01376	0.883501	1.14743	27.7978	28.84	1.03749	4.85	0.0531031	0.198408
YER074W-A	YOS1	0.781391	0.729377	1.07131	21.8517	22.6669	1.03731	4.50252	0.0528454	0.0993801
YBL075C	SSA3	1.15044	1.11273	1.03389	11.8242	12.2586	1.03674	3.61573	0.0520573	0.0480767
YNL260C	YNL260C	0.683056	0.708499	0.964088	15.3736	15.9329	1.03638	3.99394	0.0515534	-0.0527636
YMR293C	YMR293C	0.986264	1.04266	0.945909	11.4685	11.8847	1.03629	3.57103	0.0514283	-0.080226
YOL032W	OPI10	0.684899	0.589825	1.16119	15.8356	16.4099	1.03627	4.0365	0.051393	0.215605
YLR324W	PEX30	1.24438	1.15312	1.07914	20.5391	21.2831	1.03622	4.41164	0.0513372	0.109886
YDR436W	PPZ2	1.28117	1.24788	1.02668	12.5554	13.009	1.03612	3.70143	0.0511951	0.03798
YIL088C	AVT7	1.3145	1.16462	1.1287	12.1076	12.5447	1.0361	3.649	0.0511627	0.174661
YOR270C	VPH1	0.59704	0.565363	1.05603	31.8924	33.0252	1.03552	5.04549	0.0503524	0.0786495
YIL022W	TIM44	0.836853	0.795975	1.05136	21.6747	22.4417	1.03538	4.48811	0.0501669	0.0722504
YGL110C	CUE3	0.924627	0.795142	1.16284	15.0963	15.6293	1.03531	3.96618	0.0500638	0.217658
YER030W	CHZ1	0.868508	0.871693	0.996346	19.2491	19.9164	1.03467	4.31588	0.0491658	-0.00528159
YLR445W	YLR445W	0.791933	0.730244	1.08448	5.52688	5.71812	1.0346	2.51554	0.0490767	0.117
YLR248W	RCK2	1.28927	1.02836	1.25372	18.045	18.6628	1.03424	4.22209	0.0485668	0.326217
YOR030W	DFG16	0.860029	0.840414	1.02334	15.2477	15.7661	1.034	3.97876	0.0482333	0.0332852
YJL128C	PBS2	1.07265	0.998615	1.07414	16.6145	17.1786	1.03395	4.10254	0.048163	0.103179
YHL017W	YHL017W	1.13314	1.03939	1.0902	15.1343	15.6473	1.03389	3.96784	0.0480855	0.124588
YER031C	YPT31	1.10242	1.12879	0.976641	20.917	21.6258	1.03389	4.43468	0.048077	-0.0340996
YNL223W	ATG4	0.941705	0.99698	0.944557	12.7456	13.1772	1.03386	3.71997	0.0480402	-0.0822899
YLR291C	GCD7	1.1171	1.03285	1.08157	20.545	21.2378	1.03372	4.40856	0.0478485	0.113125
YNL107W	YAF9	1.1102	1.03563	1.07201	14.128	14.6036	1.03366	3.86825	0.0477584	0.100313
YBR272C	HSM3	0.585424	0.608563	0.961977	11.8531	12.2509	1.03356	3.61482	0.0476232	-0.055925
YDL107W	MSS2	0.9365	0.906908	1.03263	14.3733	14.8492	1.03311	3.89231	0.0469929	0.0463229
YGL135W	RPL1B	0.557822	0.538956	1.03501	117.263	121.136	1.03302	6.92048	0.0468743	0.0496383
YHR201C	PPX1	0.97716	0.98506	0.991979	26.7824	27.6655	1.03297	4.79002	0.0468039	-0.011618
YHR091C	MSR1	0.952488	0.794299	1.19915	12.7678	13.1863	1.03278	3.72097	0.0465326	0.262018
YNR049C	MSO1	0.998012	0.908018	1.09911	17.2142	17.778	1.03275	4.15202	0.0464901	0.136335
YER183C	FAU1	1.04793	0.99507	1.05312	14.1938	14.658	1.0327	3.87362	0.0464245	0.0746685
YFL031W	HAC1	0.545052	0.475533	1.14619	77.3632	79.8701	1.0324	6.31958	0.0460065	0.196849
YDL230W	PTP1	0.878257	0.856013	1.02598	10.9137	11.2672	1.03239	3.49405	0.0459856	0.0370094
YDR205W	MSC2	1.07843	1.09153	0.988004	13.7794	14.2241	1.03228	3.83027	0.0458319	-0.0174116
YOR005C	DNL4	0.775936	0.705864	1.09927	10.4964	10.8297	1.03176	3.43693	0.045101	0.136547
YML041C	VPS71	0.727413	0.600454	1.21144	16.4057	16.9254	1.03168	4.08112	0.0449966	0.276719
YJR139C	HOM6	1.02299	0.88075	1.1615	24.4001	25.1676	1.03145	4.65349	0.0446766	0.215993
YDL069C	CBS1	1.39819	1.12485	1.243	25.0475	25.8339	1.0314	4.69119	0.0445973	0.313826
YKR060W	UTP30	0.466059	0.457953	1.0177	21.3101	21.9755	1.03123	4.45782	0.0443611	0.0253136
YOR141C	ARP8	0.974758	0.872306	1.11745	14.2908	14.7348	1.03107	3.88116	0.0441395	0.16021
YKR096W	YKR096W	0.935761	0.783679	1.19406	14.2777	14.7123	1.03044	3.87895	0.0432544	0.255877
YJR126C	VPS70	0.888429	0.860923	1.03195	15.4962	15.9641	1.0302	3.99676	0.0429186	0.0453721
YIR032C	DAL3	1.0052	0.952206	1.05565	14.6698	15.1035	1.02956	3.91681	0.042031	0.0781375
YLR309C	IMH1	0.750623	0.699837	1.07257	10.9426	11.2656	1.02952	3.49385	0.0419676	0.101071
YDR088C	SLU7	0.643143	0.612344	1.0503	11.232	11.5627	1.02944	3.5314	0.0418561	0.0707983
YDR027C	VPS54	0.947634	0.831578	1.13956	17.5163	18.0313	1.0294	4.17243	0.0418018	0.188478
YBL090W	MRP21	0.893964	0.851126	1.05033	19.8008	20.3762	1.02906	4.34881	0.0413262	0.0708436
YOR046C	DBP5	0.710166	0.692362	1.02571	16.5929	17.0747	1.02904	4.09379	0.0412961	0.0366295
YDR129C	SAC6	0.712233	0.659839	1.0794	26.7756	27.5511	1.02896	4.78404	0.0411909	0.110234
YDR079C-A	TFB5	1.10404	1.04325	1.05827	29.5572	30.4004	1.02853	4.92602	0.0405786	0.0817087
YDR096W	GIS1	0.963794	0.821663	1.17298	16.5948	17.068	1.02852	4.09322	0.0405669	0.230178
YKL104C	GFA1	0.566837	0.473319	1.19758	22.828	23.4701	1.02813	4.55275	0.0400226	0.260121
YDL087C	LUC7	1.32671	1.39184	0.953209	13.0149	13.3809	1.02812	3.74211	0.0400138	-0.0691358
YDR272W	GLO2	0.611698	0.594587	1.02878	18.9745	19.5	1.0277	4.2854	0.0394133	0.0409303
YNL265C	IST1	0.627667	0.600504	1.04523	19.6717	20.2151	1.02763	4.33736	0.0393144	0.0638245
YDL149W	ATG9	0.933479	1.02437	0.911269	8.48735	8.71987	1.0274	3.12431	0.0389916	-0.134052
YGR167W	CLC1	0.80946	0.706952	1.145	26.2891	27.0081	1.02735	4.75532	0.0389253	0.195348
YDR041W	RSM10	1.05258	0.808005	1.30269	24.3382	25.0026	1.0273	4.644	0.0388511	0.381498
YIL102C-A	YIL102C-A	0.976093	0.988044	0.987904	18.9927	19.5105	1.02726	4.28618	0.0388028	-0.0175577
YBL019W	APN2	0.982744	0.849696	1.15658	12.0649	12.3912	1.02705	3.63125	0.0385032	0.20987
YIL006W	YIA6	1.29187	1.35754	0.951631	13.7885	14.1612	1.02703	3.82388	0.038483	-0.071526
YMR164C	MSS11	0.701069	0.651939	1.07536	9.95893	10.2261	1.02683	3.35418	0.0381929	0.104819
YKL214C	YRA2	0.920871	0.93151	0.988579	12.764	13.1062	1.02681	3.71217	0.038164	-0.0165721
YDR092W	UBC13	0.919474	0.942514	0.975555	29.19	29.9685	1.02667	4.90538	0.0379745	-0.035705
YNL078W	NIS1	0.651902	0.596366	1.09312	34.7296	35.6559	1.02667	5.15607	0.0379735	0.128457
YOR016C	ERP4	0.908224	0.888092	1.02267	19.9278	20.4565	1.02653	4.35449	0.0377812	0.0323396
YPR138C	MEP3	0.560407	0.466364	1.20165	35.9075	36.8517	1.02629	5.20366	0.0374448	0.265019
YLR433C	CNA1	0.778698	0.748002	1.04104	15.6254	16.0344	1.02617	4.0031	0.0372705	0.058023
YIL134W	FLX1	0.823036	0.748274	1.09991	40.556	41.6126	1.02605	5.37895	0.0371054	0.137388
YPR140W	TAZ1	0.771998	0.66921	1.1536	14.4195	14.7922	1.02584	3.88676	0.0368092	0.206138
YOR132W	VPS17	0.959875	0.890121	1.07837	17.0643	17.5024	1.02567	4.12948	0.0365733	0.108846
YLR407W	YLR407W	0.70269	0.551687	1.27371	22.1239	22.6904	1.0256	4.50401	0.0364739	0.349037
YMR149W	SWP1	0.921347	0.722968	1.2744	25.6493	26.3058	1.02559	4.71731	0.0364574	0.349813
YMR222C	FSH2	0.705778	0.737437	0.95707	21.0068	21.5395	1.02536	4.42891	0.0361243	-0.0633039
YJL026W	RNR2	0.702997	0.668462	1.05166	16.9532	17.3802	1.02519	4.11937	0.0358891	0.0726721
YGL084C	GUP1	1.05017	1.05587	0.994605	15.4849	15.8714	1.02496	3.98836	0.0355659	-0.00780382
YDR420W	HKR1	0.661519	0.554745	1.19247	16.7582	17.1727	1.02474	4.10205	0.0352554	0.253956
YBR154C	RPB5	0.678761	0.735013	0.923469	37.0946	38.0062	1.02457	5.24816	0.0350244	-0.114865
YDR138W	HPR1	0.881688	0.85267	1.03403	16.7676	17.1751	1.0243	4.10225	0.034645	0.0482816
YIR031C	DAL7	1.18595	1.10095	1.0772	13.3591	13.6835	1.02429	3.77437	0.0346222	0.10729
YCR009C	RVS161	0.910261	0.781466	1.16481	25.8062	26.4265	1.02404	4.72391	0.0342659	0.220098
YDR192C	NUP42	1.05372	1.11306	0.946687	10.6536	10.9041	1.02351	3.44679	0.0335211	-0.0790398
YMR030W	RSF1	1.10453	1.10302	1.00137	11.6298	11.9025	1.02345	3.5732	0.0334428	0.00197493
YBL104C	YBL104C	0.967279	0.823078	1.1752	11.685	11.9568	1.02326	3.57976	0.033176	0.232903
YBR109C	CMD1	0.832179	0.750404	1.10898	27.3966	28.0326	1.02321	4.80903	0.0331062	0.149228
YNL059C	ARP5	1.16711	1.06421	1.09669	13.3446	13.6499	1.02288	3.77082	0.0326369	0.133158
YPL164C	MLH3	0.882365	0.901911	0.978329	8.18637	8.37135	1.0226	3.06546	0.0322376	-0.0316087
YMR295C	YMR295C	0.847174	0.87501	0.968188	23.7411	24.2746	1.02247	4.60137	0.0320622	-0.0466414
YPL233W	NSL1	0.965989	0.966928	0.999029	22.7619	23.2696	1.0223	4.54037	0.0318253	-0.001402
YLR246W	ERF2	1.11996	1.06076	1.0558	15.3341	15.6696	1.02188	3.9699	0.0312287	0.0783388
YPL228W	CET1	0.812847	0.746463	1.08893	16.9808	17.3505	1.02177	4.11691	0.0310699	0.122912
YLR144C	ACF2	1.04803	0.967057	1.08373	13.3521	13.6402	1.02158	3.7698	0.0308052	0.11601
YDR108W	GSG1	0.926043	1.04062	0.889897	11.0354	11.272	1.02144	3.49468	0.03061	-0.16829
YIL065C	FIS1	1.31091	1.18825	1.10322	13.4089	13.6952	1.02135	3.7756	0.0304811	0.141725
YHL046C	PAU13	0.754246	0.770977	0.978298	2.46895	2.52158	1.02132	1.33433	0.0304336	-0.0316538
YBR102C	EXO84	0.969824	0.953984	1.0166	11.6109	11.8569	1.02118	3.56765	0.0302427	0.0237578
YDL159W	STE7	0.846938	0.825521	1.02594	12.1222	12.372	1.02061	3.62901	0.029431	0.0369507
YHL038C	CBP2	1.21756	1.24601	0.977163	13.0092	13.2756	1.02048	3.73071	0.0292495	-0.0333287
YPR085C	YPR085C	1.07249	1.02088	1.05056	13.9701	14.2559	1.02046	3.83349	0.0292189	0.071153
YDR164C	SEC1	1.15971	1.16937	0.991736	10.4579	10.6683	1.02012	3.41526	0.0287396	-0.0119723
YGR208W	SER2	0.851133	0.846637	1.00531	24.556	25.0492	1.02009	4.6467	0.0286921	0.00764124
YER022W	SRB4	0.742877	0.728067	1.02034	12.0509	12.2917	1.01998	3.61961	0.0285414	0.0290519
YCR083W	TRX3	0.915332	0.892476	1.02561	20.4987	20.9055	1.01985	4.38581	0.0283499	0.0364815
YGL100W	SEH1	0.949759	0.967037	0.982134	15.2619	15.5644	1.01982	3.96018	0.028312	-0.0260087
YGL164C	YRB30	0.845121	0.855744	0.987586	12.8099	13.0608	1.01959	3.70717	0.0279872	-0.0180213
YBL092W	RPL32	0.484707	0.425957	1.13793	125.996	128.442	1.01941	7.00497	0.027738	0.186407
YGR082W	TOM20	1.17033	1.00772	1.16136	18.9481	19.3153	1.01938	4.27167	0.0276908	0.215819
YJR061W	YJR061W	0.724752	0.637792	1.13634	16.2885	16.6028	1.0193	4.05336	0.0275774	0.1844
YGR193C	PDX1	0.956337	0.842917	1.13456	25.1455	25.6232	1.019	4.67938	0.0271476	0.182127
YLR173W	YLR173W	1.0443	1.03615	1.00787	12.0552	12.2817	1.01878	3.61843	0.026847	0.0113046
YBR233W-A	DAD3	0.674366	0.657019	1.0264	16.0704	16.3668	1.01844	4.0327	0.0263641	0.0375981
YFL033C	RIM15	0.545052	0.475533	1.14619	11.8567	12.0745	1.01837	3.5939	0.0262644	0.196849
YBR216C	YBP1	1.01044	0.995511	1.015	14.9224	15.1923	1.01809	3.92527	0.0258588	0.0214778
YIL129C	TAO3	1.10052	0.923894	1.19118	13.3032	13.5404	1.01783	3.7592	0.0254973	0.25239
YDR419W	RAD30	1.16222	1.06139	1.095	9.20778	9.36992	1.01761	3.22804	0.0251826	0.13093
YLR362W	STE11	1.05838	1.02534	1.03223	9.43057	9.59613	1.01756	3.26245	0.0251079	0.0457607
YJL133W	MRS3	0.359319	0.310198	1.15835	24.8155	25.249	1.01747	4.65816	0.0249883	0.212076
YDR350C	TCM10	0.915637	0.802633	1.14079	16.8759	17.1706	1.01746	4.10187	0.024975	0.190035
YER048C	CAJ1	0.950256	0.923574	1.02889	14.292	14.5409	1.01742	3.86205	0.0249114	0.0410892
YGR282C	BGL2	0.728762	0.704496	1.03444	56.9852	57.9693	1.01727	5.85722	0.0247023	0.0488555
YHL001W	RPL14B	0.725296	0.667193	1.08709	84.0473	85.492	1.01719	6.41772	0.0245871	0.120466
YDR410C	STE14	1.05391	1.03263	1.0206	29.6576	30.1673	1.01719	4.91491	0.0245825	0.0294231
YGR186W	TFG1	1.10628	1.02772	1.07644	16.9281	17.2143	1.01691	4.10554	0.0241913	0.10627
YOR018W	ROD1	0.785038	0.69972	1.12193	17.7312	18.0282	1.01675	4.17218	0.0239673	0.165985
YBR007C	DSF2	1.00176	0.919791	1.08912	11.5819	11.7752	1.01669	3.55768	0.0238826	0.123159
YGR227W	DIE2	0.86953	0.822195	1.05757	11.5091	11.7001	1.01659	3.54844	0.0237348	0.0807553
YAL001C	TFC3	0.898052	0.802727	1.11875	14.2434	14.4794	1.01657	3.85593	0.0237067	0.161889
YKL160W	ELF1	0.588127	0.531076	1.10742	29.2122	29.6961	1.01656	4.8922	0.0237007	0.147208
YJR088C	YJR088C	0.940903	0.911662	1.03207	39.8626	40.522	1.01654	5.34063	0.023669	0.0455461
YEL004W	YEA4	1.11391	1.06438	1.04653	15.6003	15.8574	1.01648	3.98708	0.0235842	0.0656125
YDR151C	CTH1	0.685561	0.676033	1.01409	26.2589	26.6897	1.01641	4.73821	0.0234775	0.0201922
YPR095C	SYT1	0.996143	1.02916	0.96792	10.9991	11.1773	1.0162	3.4825	0.0231871	-0.0470396
YHR110W	ERP5	0.973989	0.991913	0.98193	28.8902	29.3544	1.01607	4.8755	0.0229969	-0.026308
YLR277C	YSH1	0.539854	0.506804	1.06521	13.5008	13.717	1.01601	3.7779	0.0229204	0.0911431
YKR039W	GAP1	1.06746	0.978019	1.09145	14.0029	14.2266	1.01598	3.83052	0.0228667	0.126249
YBR257W	POP4	0.808384	0.708216	1.14144	16.9531	17.2239	1.01598	4.10634	0.0228652	0.19085
YCL034W	LSB5	1.25656	1.02132	1.23033	16.6434	16.907	1.01584	4.07955	0.0226699	0.299048
YKL059C	MPE1	0.944503	0.88661	1.0653	33.1593	33.6783	1.01565	5.07375	0.0224078	0.0912569
YOR181W	LAS17	0.901041	0.922114	0.977147	16.9546	17.22	1.01565	4.10601	0.0224063	-0.0333531
YFR039C	YFR039C	0.678792	0.664418	1.02163	13.0946	13.2972	1.01548	3.73305	0.0221584	0.030877
YLR066W	SPC3	1.17845	1.14016	1.03358	16.04	16.2814	1.01505	4.02515	0.0215496	0.047647
YBR234C	ARC40	1.03577	1.01207	1.02342	18.9651	19.2467	1.01485	4.26654	0.0212668	0.0334033
YGR118W	RPS23A	0.483473	0.474507	1.0189	113.003	114.681	1.01485	6.84148	0.0212657	0.0270064
YGR015C	YGR015C	1.02486	0.87803	1.16723	19.2282	19.5117	1.01474	4.28627	0.0211114	0.223088
YDR459C	PFA5	1.07641	1.02838	1.04671	16.4719	16.7113	1.01454	4.06275	0.0208189	0.0658593
YPR201W	ARR3	0.965074	0.932976	1.0344	7.18985	7.29425	1.01452	2.86676	0.0207988	0.0488008
YDR084C	TVP23	1.07892	0.885689	1.21817	15.2408	15.4606	1.01442	3.95052	0.0206568	0.284711
YHR121W	LSM12	0.806826	0.777603	1.03758	22.9031	23.2312	1.01433	4.53799	0.0205211	0.0532243
YKR022C	NTR2	1.146	1.14159	1.00387	15.4857	15.7021	1.01397	3.97288	0.0200219	0.00556747
YGR074W	SMD1	0.534132	0.591752	0.902629	29.0731	29.4745	1.01381	4.88139	0.0197811	-0.147796
YHR171W	ATG7	0.730901	0.744482	0.981757	9.13297	9.25882	1.01378	3.21083	0.0197433	-0.0265614
YAL054C	ACS1	0.416233	0.374043	1.11279	8.2306	8.34345	1.01371	3.06064	0.019646	0.154188
YOR109W	INP53	0.647603	0.728015	0.889546	17.6798	17.9202	1.0136	4.16352	0.0194885	-0.168859
YGL189C	RPS26A	0.335881	0.343518	0.977766	146.845	148.8	1.01332	7.21723	0.0190892	-0.032439
YDR377W	ATP17	0.756117	0.657076	1.15073	30.3692	30.7683	1.01314	4.94337	0.0188358	0.202548
YPL118W	MRP51	0.837048	0.79973	1.04666	20.7687	21.0402	1.01307	4.39508	0.0187362	0.0657987
YLL033W	YLL033W	1.11536	1.06514	1.04714	14.2068	14.3911	1.01297	3.8471	0.0185947	0.066461
YIL134C-A	YIL134C-A	1.01638	0.897225	1.13281	17.122	17.3432	1.01292	4.1163	0.0185201	0.179905
YIL156W-B	YIL156W-B	1.30367	1.30863	0.996214	19.0651	19.3111	1.0129	4.27136	0.0184914	-0.00547286
YOR291W	YOR291W	0.719983	0.600326	1.19932	15.1132	15.3066	1.0128	3.93608	0.0183486	0.262216
YCR076C	YCR076C	0.866083	0.830601	1.04272	14.6533	14.8334	1.01229	3.89078	0.0176225	0.06035
YDL092W	SRP14	1.00501	0.937772	1.0717	25.107	25.4155	1.01229	4.66763	0.0176171	0.099895
YIR001C	SGN1	1.01304	1.00311	1.0099	11.8145	11.9554	1.01193	3.57959	0.0171049	0.014215
YNL325C	FIG4	1.13664	1.01357	1.12142	7.14622	7.23128	1.0119	2.85425	0.0170712	0.16533
YMR150C	IMP1	1.08443	1.06123	1.02186	18.8262	19.0432	1.01153	4.25121	0.0165384	0.0311968
YLR065C	YLR065C	1.17845	1.14016	1.03358	22.69	22.948	1.01137	4.52029	0.0163114	0.047647
YGR183C	QCR9	0.763282	0.73795	1.03433	38.7997	39.2403	1.01136	5.29427	0.016292	0.0486925
YOR223W	YOR223W	0.688685	0.687242	1.0021	19.693	19.9166	1.01135	4.3159	0.0162885	0.00302595
YNL135C	FPR1	0.835602	0.815332	1.02486	47.9871	48.5315	1.01134	5.60085	0.0162739	0.0354299
YPL115C	BEM3	0.943784	0.970865	0.972106	14.4562	14.6165	1.01108	3.86952	0.0159018	-0.0408138
YOR382W	FIT2	1.08065	0.929386	1.16276	11.5701	11.695	1.0108	3.54782	0.0154984	0.21755
YPR149W	NCE102	0.289419	0.252889	1.14445	148.479	150.066	1.01069	7.22946	0.0153466	0.19465
YPL124W	SPC29	0.76004	0.764496	0.994172	11.9043	12.0282	1.01041	3.58835	0.0149464	-0.00843278
YOR316C	COT1	1.00584	0.926618	1.08549	17.0365	17.2134	1.01038	4.10546	0.0149013	0.118347
YMR155W	YMR155W	1.00194	0.91404	1.09616	12.582	12.7103	1.0102	3.66793	0.0146393	0.132464
YNR037C	RSM19	1.15235	1.1787	0.977643	26.3858	26.6437	1.00977	4.73572	0.014033	-0.0326201
YDR229W	IVY1	0.979115	0.855803	1.14409	18.0267	18.2006	1.00965	4.18591	0.0138502	0.1942
YLL060C	GTT2	1.0045	1.05688	0.950437	9.47093	9.56011	1.00942	3.25703	0.0135209	-0.0733374
YOL159C-A	YOL159C-A	1.10959	1.01518	1.093	15.4304	15.5749	1.00937	3.96115	0.0134505	0.12829
YER041W	YEN1	0.705759	0.63291	1.1151	10.4838	10.5792	1.0091	3.40316	0.0130719	0.157175
YDR462W	MRPL28	1.15926	0.972549	1.19198	24.7765	24.9985	1.00896	4.64377	0.0128647	0.253356
YOR129C	YOR129C	1.03218	0.912799	1.13078	10.0544	10.1443	1.00894	3.3426	0.0128389	0.177325
YIL034C	CAP2	0.927811	0.885589	1.04768	33.1254	33.4194	1.00888	5.06261	0.0127487	0.0671938
YNL306W	MRPS18	1.15789	0.988943	1.17083	29.263	29.5223	1.00886	4.88373	0.0127238	0.227534
YAL007C	ERP2	1.11375	1.03764	1.07335	18.976	19.1433	1.00882	4.25877	0.0126657	0.102126
YAL058W	CNE1	0.884417	0.836828	1.05687	8.57723	8.65237	1.00876	3.11309	0.0125834	0.079795
YKL047W	YKL047W	0.889083	0.895191	0.993178	13.0613	13.1743	1.00865	3.71965	0.0124246	-0.00987598
YFL034C-B	MOB2	0.652223	0.689093	0.946496	20.8752	21.0556	1.00864	4.39613	0.0124176	-0.0793317
YNL131W	TOM22	0.773972	0.786211	0.984433	30.0012	30.2592	1.0086	4.9193	0.0123514	-0.0226348
YOR057W	SGT1	0.955608	0.849125	1.1254	15.1595	15.2885	1.00851	3.93437	0.0122231	0.170442
YLR195C	NMT1	1.0404	0.967438	1.07542	17.3116	17.4558	1.00833	4.12564	0.0119706	0.1049
YOR138C	RUP1	0.821394	0.812152	1.01138	19.3474	19.5065	1.00822	4.28588	0.0118167	0.0163249
YGL194C-A	YGL194C-A	0.650902	0.491422	1.32453	22.9852	23.1707	1.00807	4.53423	0.0115985	0.405479
YAL016W	TPD3	1.19373	1.14668	1.04103	23.7921	23.9821	1.00799	4.58389	0.0114753	0.0580085
YGL039W	YGL039W	0.508387	0.493871	1.02939	19.7307	19.8875	1.00795	4.31379	0.0114207	0.0417943
YOL056W	GPM3	0.804313	0.760938	1.057	11.3371	11.4261	1.00785	3.51426	0.0112814	0.0799778
YIL089W	YIL089W	0.674278	0.672791	1.00221	14.1293	14.24	1.00783	3.83188	0.0112589	0.00318601
YCR098C	GIT1	1.03174	1.07264	0.961869	3.36877	3.39474	1.00771	1.7633	0.0110789	-0.0560872
YIL003W	CFD1	1.05884	1.13799	0.930448	16.08	16.2007	1.00751	4.01799	0.010792	-0.104002
YNL025C	SSN8	0.810013	0.767543	1.05533	14.9346	15.0465	1.00749	3.91136	0.0107694	0.0776983
YBL072C	RPS8A	0.391759	0.372764	1.05096	95.5851	96.3007	1.00749	6.58947	0.010761	0.0717028
YOR380W	RDR1	1.22217	1.08214	1.1294	9.44072	9.50738	1.00706	3.24905	0.0101505	0.175551
YHR012W	VPS29	1.14011	0.991872	1.14945	14.3999	14.4998	1.00693	3.85796	0.00996736	0.200947
YNL167C	SKO1	0.880828	0.813245	1.0831	17.5237	17.6441	1.00687	4.14111	0.00987402	0.115171
YLR393W	ATP10	0.962647	0.926906	1.03856	11.6372	11.7164	1.00681	3.55046	0.00979308	0.0545841
YMR176W	ECM5	1.07152	0.875684	1.22364	10.2894	10.3594	1.0068	3.37286	0.00977951	0.291175
YGR218W	CRM1	0.64938	0.634651	1.02321	20.7494	20.89	1.00677	4.38474	0.00973924	0.0331009
YAL064W	YAL064W	0.405518	0.379103	1.06968	3.56105	3.58481	1.00667	1.8419	0.00959291	0.0971787
YOR022C	YOR022C	1.03067	0.992845	1.03809	10.2681	10.3359	1.00661	3.3696	0.00950088	0.0539356
YOL060C	MAM3	0.698084	0.506935	1.37707	18.4497	18.5704	1.00654	4.21493	0.00940571	0.4616
YPR162C	ORC4	0.545444	0.569466	0.957817	14.626	14.7185	1.00632	3.87955	0.00909365	-0.0621781
YMR148W	YMR148W	0.998479	0.915824	1.09025	31.0321	31.2277	1.0063	4.96475	0.00906544	0.124661
YJR048W	CYC1	0.470821	0.51063	0.922039	32.6656	32.8642	1.00608	5.03844	0.00874225	-0.1171
YKL174C	TPO5	1.05483	1.00013	1.05469	13.1711	13.2509	1.00606	3.72802	0.0087119	0.0768154
YOL039W	RPP2A	0.386616	0.361129	1.07058	140.994	141.827	1.00591	7.14799	0.00850183	0.0983861
YAL051W	OAF1	0.701128	0.672496	1.04258	12.4919	12.5649	1.00584	3.65132	0.00840534	0.0601516
YOR388C	FDH1	0.724158	0.758636	0.954553	4.81459	4.84224	1.00574	2.27567	0.00826089	-0.0671022
YLR389C	STE23	0.915136	0.793018	1.15399	16.9937	17.091	1.00573	4.09516	0.00823889	0.206632
YBL088C	TEL1	1.0428	0.892584	1.16829	11.6832	11.748	1.00555	3.55434	0.00798278	0.224399
YKL117W	SBA1	0.71949	0.666777	1.07906	31.3869	31.5566	1.00541	4.97987	0.00778251	0.109772
YML078W	CPR3	0.869451	0.739317	1.17602	26.6256	26.7668	1.0053	4.74237	0.00763059	0.233912
YDR261C	EXG2	0.840221	0.690222	1.21732	18.1437	18.2356	1.00506	4.18868	0.0072849	0.283708
YJR136C	YJR136C	0.913304	0.767965	1.18925	14.25	14.3206	1.00495	3.84002	0.00712708	0.250054
YBL095W	YBL095W	0.736037	0.691406	1.06455	26.9323	27.0649	1.00492	4.75835	0.00708215	0.0902452
YKL155C	RSM22	0.95145	0.933801	1.0189	19.8596	19.9529	1.0047	4.31853	0.0067663	0.0270125
YJR083C	ACF4	1.06042	1.05948	1.00089	14.7056	14.7732	1.0046	3.88491	0.00662371	0.00128432
YKR043C	YKR043C	0.916932	0.888125	1.03244	53.4623	53.7048	1.00454	5.74698	0.00653099	0.0460528
YJL063C	MRPL8	1.24123	1.1428	1.08613	21.1243	21.2199	1.00453	4.40735	0.00651936	0.119198
YLR013W	GAT3	1.05939	1.118	0.947583	3.19841	3.21195	1.00423	1.68345	0.00609137	-0.0776765
YDL108W	KIN28	1.01747	0.97718	1.04123	13.3393	13.3954	1.00421	3.74366	0.00605556	0.0582917
YOR190W	SPR1	0.901675	0.844811	1.06731	8.84147	8.87734	1.00406	3.15013	0.005841	0.0939779
YPL053C	KTR6	0.932478	0.971395	0.959938	13.4065	13.4579	1.00384	3.75039	0.00552462	-0.0589876
YGR261C	APL6	0.994495	0.904568	1.09941	12.5029	12.5506	1.00382	3.64968	0.00549533	0.136734
YDR392W	SPT3	1.20293	1.13152	1.0631	12.8885	12.9362	1.0037	3.69334	0.00533223	0.0882838
YMR047C	NUP116	1.12714	1.06927	1.05411	20.3556	20.4287	1.00359	4.35253	0.00517146	0.0760321
YER134C	YER134C	1.19125	1.11649	1.06696	15.9178	15.974	1.00353	3.99765	0.00508501	0.0935036
YPL022W	RAD1	1.08515	1.02482	1.05886	12.427	12.4666	1.00319	3.64	0.00459199	0.0825151
YLR273C	PIG1	0.810053	0.734339	1.1031	5.68772	5.70519	1.00307	2.51227	0.00442319	0.14157
YPR200C	ARR2	0.965074	0.932976	1.0344	14.8539	14.897	1.0029	3.89695	0.00417905	0.0488008
YGR129W	SYF2	0.772187	0.785712	0.982786	15.6134	15.6562	1.00274	3.96866	0.00394521	-0.0250514
YHR159W	YHR159W	0.931275	0.973257	0.956865	8.74463	8.76846	1.00272	3.13232	0.00392549	-0.0636128
YGR003W	CUL3	0.978476	0.930966	1.05103	10.6793	10.6995	1.0019	3.41947	0.00273325	0.0718085
YKR029C	SET3	0.836026	0.789047	1.05954	13.2697	13.2931	1.00176	3.7326	0.00254096	0.0834354
YCR105W	ADH7	0.688703	0.750183	0.918047	5.81975	5.82957	1.00169	2.54339	0.00243107	-0.123361
YMR180C	CTL1	0.603779	0.551415	1.09496	32.3451	32.3919	1.00145	5.01756	0.0020856	0.130884
YOR216C	RUD3	0.876766	0.886611	0.988896	11.9696	11.9868	1.00144	3.58338	0.0020766	-0.0161093
YIL067C	YIL067C	0.858611	0.795471	1.07937	8.89117	8.90305	1.00134	3.1543	0.00192723	0.110194
YCR017C	CWH43	0.968595	0.938532	1.03203	15.0695	15.0777	1.00054	3.91434	0.000784105	0.0454869
YER010C	YER010C	1.20523	1.08662	1.10915	17.8992	17.9053	1.00034	4.16231	0.000489262	0.14946
YMR317W	YMR317W	0.845396	0.725184	1.16577	11.3576	11.3595	1.00017	3.50583	0.000239807	0.22128
YOR332W	VMA4	1.04417	1.02926	1.01449	27.7686	27.772	1.00012	4.79556	0.000173032	0.0207564
YDL103C	QRI1	1.21694	1.26504	0.961974	10.1372	10.1383	1.0001	3.34174	0.000148812	-0.0559296
YBR269C	FMP21	0.827983	0.827446	1.00065	20.3851	20.3865	1.00007	4.34954	9.61414e-05	0.000935469
YGR144W	THI4	0.654274	0.482031	1.35733	8.1335	8.13181	0.999792	3.02358	-0.000299734	0.440769
YMR022W	QRI8	1.18843	1.09789	1.08247	20.0274	20.0192	0.999591	4.32331	-0.000589943	0.114324
YNL335W	DDI3	0.337328	0.381236	0.884828	7.78934	7.78593	0.999562	2.96087	-0.000631878	-0.176531
YNL049C	SFB2	1.50229	1.38028	1.0884	11.9095	11.9041	0.999546	3.57339	-0.000654856	0.122202
YNL249C	MPA43	0.767724	0.766378	1.00176	11.5478	11.5406	0.999376	3.52865	-0.000899942	0.00253192
YNL012W	SPO1	0.710855	0.615758	1.15444	9.57814	9.57119	0.999275	3.2587	-0.00104668	0.207192
YMR225C	MRPL44	0.930894	0.899153	1.0353	20.1411	20.1207	0.998986	4.33061	-0.00146393	0.0500508
YOL066C	RIB2	0.658554	0.558582	1.17897	14.4408	14.4247	0.998887	3.85047	-0.00160641	0.237533
YBR164C	ARL1	0.671034	0.612038	1.09639	18.7819	18.7603	0.998851	4.22961	-0.00165819	0.132764
YNL026W	SAM50	0.778484	0.710554	1.0956	15.164	15.1446	0.998723	3.92073	-0.00184364	0.131724
YHR164C	DNA2	1.11734	1.12127	0.996493	10.9472	10.9321	0.998623	3.4505	-0.00198739	-0.00506786
YOR197W	MCA1	1.00989	1.03718	0.973682	15.4363	15.4131	0.998495	3.94608	-0.00217296	-0.0384775
YEL058W	PCM1	1.27944	1.27266	1.00533	14.4694	14.4466	0.998426	3.85266	-0.00227208	0.00767454
YOL013C	HRD1	0.723546	0.675407	1.07127	15.5089	15.4756	0.997848	3.95192	-0.00310792	0.099328
YPL129W	TAF14	0.733546	0.692077	1.05992	25.7784	25.7222	0.997821	4.68494	-0.00314726	0.083955
YLR020C	YEH2	1.02736	0.931013	1.10349	12.6294	12.6018	0.997816	3.65556	-0.0031543	0.142067
YNL312W	RFA2	0.957307	0.989764	0.967208	15.2784	15.2448	0.997802	3.93024	-0.00317398	-0.0481021
YKL063C	YKL063C	0.688314	0.513118	1.34143	30.9841	30.9151	0.997772	4.95024	-0.00321796	0.423775
YOL111C	MDY2	0.865416	0.73057	1.18458	33.6277	33.5488	0.997654	5.06819	-0.00338835	0.244371
YFL050C	ALR2	0.780513	0.76826	1.01595	9.12276	9.10068	0.99758	3.18597	-0.00349514	0.0228284
YDR370C	YDR370C	1.00217	0.993768	1.00846	16.2871	16.2464	0.997502	4.02205	-0.00360845	0.0121508
YDL243C	AAD4	1.21234	1.14115	1.06238	7.28688	7.26762	0.997356	2.86148	-0.0038189	0.0873003
YGL047W	ALG13	0.999675	0.848514	1.17815	27.4615	27.3821	0.99711	4.77516	-0.00417607	0.23652
YGR150C	YGR150C	1.32289	1.2813	1.03246	15.1875	15.1399	0.996866	3.92028	-0.00452896	0.0460791
YJL193W	YJL193W	1.18712	1.08001	1.09918	17.7295	17.672	0.996756	4.14339	-0.0046875	0.136422
YBR208C	DUR1,2	0.993261	0.795944	1.2479	9.23447	9.20368	0.996666	3.20221	-0.00481748	0.319505
YGR035C	YGR035C	0.503736	0.430291	1.17069	18.4866	18.4244	0.996636	4.20355	-0.00486144	0.227355
YDL073W	YDL073W	1.01286	0.884604	1.14499	12.9807	12.9318	0.996236	3.69286	-0.00543991	0.195336
YHR021C	RPS27B	0.338139	0.312013	1.08373	99.9208	99.5226	0.996015	6.63695	-0.00576005	0.116009
YNL021W	HDA1	0.861703	0.828244	1.0404	12.7698	12.7179	0.995935	3.66879	-0.00587673	0.0571354
YDR326C	YSP2	0.955624	0.919895	1.03884	16.062	15.9947	0.995813	3.99952	-0.00605381	0.0549734
YMR209C	YMR209C	0.718685	0.747884	0.960957	13.9109	13.8514	0.995718	3.79196	-0.00619147	-0.0574558
YPR043W	RPL43A	0.647057	0.583237	1.10942	115.26	114.759	0.995653	6.84246	-0.00628449	0.149809
YFR053C	HXK1	0.655125	0.563639	1.16231	56.5926	56.3253	0.995277	5.81571	-0.0068305	0.217
YLR033W	RSC58	0.778865	0.762242	1.02181	22.8759	22.7672	0.995248	4.50888	-0.00687182	0.0311254
YOR313C	SPS4	0.898899	0.895459	1.00384	6.97028	6.93683	0.995201	2.79428	-0.00694036	0.00553057
YJL136C	RPS21B	0.518913	0.469299	1.10572	81.5695	81.1572	0.994945	6.34265	-0.00731086	0.144984
YHR124W	NDT80	0.86221	0.876051	0.984201	12.656	12.5915	0.994908	3.65438	-0.00736505	-0.0229755
YML129C	COX14	0.991435	0.784634	1.26356	30.5031	30.3404	0.994666	4.92317	-0.00771574	0.337499
YGL134W	PCL10	0.714054	0.614476	1.16205	21.543	21.4266	0.994601	4.42133	-0.00781082	0.216677
YBR279W	PAF1	0.832181	0.745014	1.117	20.9464	20.8328	0.994577	4.38078	-0.00784466	0.159629
YDL124W	YDL124W	0.589033	0.474241	1.24205	55.3452	55.0299	0.994302	5.78214	-0.00824413	0.312729
YDL141W	BPL1	1.02382	0.924599	1.10732	13.0948	13.0192	0.994225	3.70257	-0.00835589	0.147067
YHL010C	YHL010C	0.845179	0.756645	1.11701	14.4286	14.341	0.993929	3.84208	-0.00878551	0.15964
YML026C	RPS18B	0.427768	0.442936	0.965755	90.3609	89.8051	0.993849	6.48873	-0.00890144	-0.0502704
YDR289C	RTT103	0.851864	0.885592	0.961915	13.4026	13.3188	0.993745	3.73539	-0.00905293	-0.0560182
YAR050W	FLO1	0.928731	0.83475	1.11259	7.71527	7.66653	0.993683	2.93857	-0.00914206	0.153916
YCR081W	SRB8	0.90877	0.868947	1.04583	11.1818	11.1101	0.993589	3.4738	-0.00927828	0.0646461
YDL135C	RDI1	0.754297	0.752566	1.0023	24.7622	24.6025	0.993552	4.62073	-0.00933229	0.00331516
YKR078W	YKR078W	0.979103	0.985277	0.993733	9.30959	9.24745	0.993324	3.20905	-0.00966343	-0.00906981
YCL017C	NFS1	0.873993	0.804204	1.08678	13.4099	13.3198	0.993282	3.73551	-0.00972534	0.120062
YLR069C	MEF1	0.956966	0.901028	1.06208	13.4503	13.3587	0.993191	3.7397	-0.00985651	0.0868947
YIL002C	INP51	0.797357	0.715713	1.11407	14.3319	14.2314	0.992993	3.83101	-0.0101444	0.155844
YLR275W	SMD2	0.858414	0.748692	1.14655	13.4372	13.3409	0.992835	3.73779	-0.0103741	0.197302
YIL048W	NEO1	0.921223	0.800573	1.1507	19.45	19.3101	0.992811	4.27129	-0.0104095	0.202518
YOR019W	YOR019W	0.900632	0.942014	0.95607	11.3883	11.3043	0.99262	3.4988	-0.0106862	-0.0648115
YGL054C	ERV14	0.518388	0.471877	1.09857	31.0104	30.7812	0.992607	4.94398	-0.0107053	0.135621
YPR082C	DIB1	1.32644	1.31051	1.01215	15.2212	15.1068	0.99248	3.91712	-0.0108904	0.0174267
YMR210W	YMR210W	0.718685	0.747884	0.960957	21.2898	21.1259	0.992305	4.40094	-0.0111452	-0.0574558
YHR034C	PIH1	1.09475	1.02931	1.06358	11.493	11.4015	0.992037	3.51115	-0.0115337	0.0889247
YNL212W	VID27	1.161	1.14827	1.01108	13.3645	13.2579	0.992023	3.72878	-0.011555	0.015904
YNL080C	YNL080C	0.745601	0.716251	1.04098	16.4105	16.2789	0.991981	4.02493	-0.0116159	0.0579394
YIL151C	YIL151C	0.894373	0.936223	0.955299	17.9933	17.8464	0.991833	4.15756	-0.0118305	-0.0659758
YBR077C	SLM4	0.45045	0.449606	1.00188	38.3075	37.9942	0.991822	5.24771	-0.0118473	0.00270547
YBL017C	PEP1	0.79784	0.618696	1.28955	22.4336	22.2499	0.991812	4.47573	-0.0118608	0.366869
YLR100W	ERG27	1.26572	1.29378	0.978314	21.4107	21.2349	0.991791	4.40837	-0.0118916	-0.0316304
YMR117C	SPC24	0.93871	0.975454	0.962332	20.3154	20.1473	0.991725	4.33251	-0.0119886	-0.055394
YNL106C	INP52	0.94108	0.851825	1.10478	10.2986	10.213	0.991682	3.35233	-0.0120503	0.143761
YLR218C	YLR218C	0.998425	0.943441	1.05828	17.2554	17.1102	0.991584	4.09678	-0.0121937	0.0817219
YHR002W	LEU5	0.749766	0.645763	1.16105	19.9815	19.8124	0.991538	4.30833	-0.0122602	0.215436
YLR281C	YLR281C	1.4068	1.32688	1.06023	9.86857	9.78468	0.991499	3.29052	-0.0123164	0.0843746
YER158C	YER158C	0.469077	0.363055	1.29203	11.2424	11.1458	0.991412	3.47843	-0.0124433	0.369638
YDL006W	PTC1	0.828465	0.675187	1.22702	19.1607	18.9954	0.991374	4.24758	-0.012499	0.295154
YGL098W	USE1	0.630559	0.554019	1.13815	16.3464	16.2043	0.991306	4.0183	-0.0125976	0.186695
YDR191W	HST4	0.858127	0.991036	0.865889	12.1447	12.0381	0.991215	3.58953	-0.0127298	-0.207746
YGL145W	TIP20	0.651111	0.647378	1.00577	12.7416	12.6288	0.991145	3.65865	-0.0128314	0.00829486
YDR281C	PHM6	1.01844	0.942191	1.08093	8.01418	7.94291	0.991107	2.98967	-0.0128876	0.112277
YDR309C	GIC2	0.39889	0.369255	1.08026	46.6831	46.261	0.990957	5.53172	-0.013105	0.111373
YJR113C	RSM7	0.803611	0.742432	1.0824	19.338	19.1628	0.990944	4.26024	-0.0131246	0.114238
YGL071W	AFT1	0.830255	0.734971	1.12964	21.1214	20.9299	0.990933	4.38749	-0.0131401	0.175867
YJL206C	YJL206C	1.12059	1.02854	1.08949	9.95323	9.86173	0.990807	3.30184	-0.0133246	0.123654
YCR092C	MSH3	0.935816	0.973556	0.961235	13.6602	13.5331	0.99069	3.75842	-0.0134945	-0.0570385
YLR256W	HAP1	0.558969	0.522173	1.07047	56.0027	55.4693	0.990476	5.79362	-0.0138062	0.0982395
YKR072C	SIS2	0.805688	0.783106	1.02884	19.2414	19.0563	0.990381	4.2522	-0.0139447	0.0410137
YLR205C	HMX1	1.31808	1.26846	1.03912	12.0361	11.9185	0.990236	3.57514	-0.0141552	0.0553654
YGR216C	GPI1	1.12725	1.11155	1.01412	16.6824	16.5191	0.99021	4.04606	-0.0141934	0.0202319
YOR231W	MKK1	0.777121	0.65643	1.18386	15.6101	15.4569	0.990186	3.95018	-0.0142282	0.243498
YKL062W	MSN4	0.825253	0.66181	1.24696	21.6812	21.4682	0.990175	4.42413	-0.0142441	0.31842
YKL080W	VMA5	0.514008	0.521928	0.984824	29.3003	29.0097	0.990079	4.85846	-0.0143843	-0.0220623
YOR264W	DSE3	0.785192	0.836465	0.938703	33.5687	33.2299	0.989906	5.05441	-0.0146368	-0.0912592
YHR031C	RRM3	0.846421	0.751926	1.12567	12.5084	12.3801	0.989748	3.62995	-0.0148661	0.170785
YNR021W	YNR021W	0.89461	0.844508	1.05933	24.707	24.4519	0.989675	4.61187	-0.0149728	0.0831485
YLR427W	MAG2	1.03482	1.03043	1.00427	11.0953	10.98	0.989606	3.4568	-0.0150741	0.00614031
YKR084C	HBS1	1.13664	0.98852	1.14984	11.1409	11.0227	0.989391	3.46241	-0.0153879	0.201427
YDL057W	YDL057W	0.86669	0.874309	0.991285	10.2952	10.1841	0.98921	3.34825	-0.0156518	-0.0126285
YDR338C	YDR338C	1.04181	1.0232	1.01818	11.2823	11.1593	0.989095	3.48017	-0.0158186	0.0259943
YFL036W	RPO41	0.72769	0.718629	1.01261	15.1786	15.0116	0.988998	3.90801	-0.0159605	0.0180769
YBR171W	SEC66	0.825073	0.776822	1.06211	22.5482	22.2947	0.988758	4.47863	-0.0163109	0.0869386
YKL137W	YKL137W	1.02884	0.920006	1.11829	20.8717	20.635	0.988662	4.36702	-0.0164513	0.161299
YGL014W	PUF4	0.689514	0.655749	1.05149	23.3429	23.078	0.988652	4.52845	-0.0164656	0.0724357
YOR265W	RBL2	0.995978	0.934052	1.0663	26.4559	26.1555	0.988644	4.70904	-0.0164766	0.0926121
YOR370C	MRS6	0.685472	0.602964	1.13684	33.6714	33.2783	0.988327	5.05651	-0.0169399	0.185025
YAL039C	CYC3	0.842757	0.774398	1.08827	18.0944	17.8806	0.988188	4.16032	-0.017143	0.122041
YPL159C	PET20	0.785192	0.731747	1.07304	15.1246	14.9457	0.98817	3.90166	-0.0171688	0.101702
YOR047C	STD1	0.63364	0.545386	1.16182	24.8723	24.5733	0.987978	4.61902	-0.0174485	0.216384
YHL008C	YHL008C	0.911953	0.771269	1.18241	18.1393	17.9205	0.987938	4.16354	-0.0175077	0.241725
YKL141W	SDH3	0.873775	0.833734	1.04803	22.7482	22.4732	0.98791	4.49013	-0.0175482	0.0676731
YER170W	ADK2	0.942951	0.886183	1.06406	17.8333	17.6138	0.987694	4.13864	-0.0178638	0.0895776
YNL108C	YNL108C	1.1102	1.03563	1.07201	13.0725	12.9098	0.987556	3.69039	-0.0180653	0.100313
YLR299W	ECM38	0.764947	0.699909	1.09292	15.0766	14.8887	0.987539	3.89615	-0.0180903	0.128192
YMR303C	ADH2	0.675202	0.619013	1.09077	19.2014	18.9568	0.987261	4.24464	-0.0184965	0.125351
YNL286W	CUS2	0.915817	0.822242	1.1138	15.755	15.5527	0.987163	3.9591	-0.0186399	0.155496
YDR314C	RAD34	0.917496	0.976874	0.939216	12.5948	12.4323	0.987094	3.63602	-0.0187399	-0.0904714
YIL018W	RPL2B	0.388002	0.38271	1.01383	108.171	106.768	0.987037	6.73834	-0.0188243	0.0198117
YNL263C	YIF1	0.965375	0.940954	1.02595	14.4971	14.3091	0.987031	3.83886	-0.0188322	0.0369662
YGR021W	YGR021W	1.06437	1.01343	1.05027	16.2588	16.0468	0.986964	4.00421	-0.0189307	0.0707546
YGL151W	NUT1	0.935555	0.880175	1.06292	15.9176	15.7085	0.986867	3.97348	-0.019072	0.0880321
YBL015W	ACH1	1.40001	1.32949	1.05304	10.2564	10.1203	0.986729	3.33918	-0.0192739	0.074565
YFR032C-A	RPL29	0.300081	0.261133	1.14915	124	122.342	0.986623	6.93477	-0.0194293	0.200563
YDR109C	YDR109C	0.989114	0.952246	1.03872	10.0194	9.87977	0.986061	3.30448	-0.0202517	0.0548016
YLR224W	YLR224W	1.09019	0.940937	1.15862	21.8599	21.5518	0.985906	4.42973	-0.0204781	0.212404
YOL075C	YOL075C	1.32118	1.19165	1.1087	9.8175	9.6776	0.98575	3.27465	-0.0207061	0.148863
YGL240W	DOC1	0.919558	0.886866	1.03686	12.7726	12.5903	0.985727	3.65424	-0.0207402	0.0522233
YDL186W	YDL186W	0.806283	0.781254	1.03204	19.2793	19.0032	0.98568	4.24817	-0.0208085	0.0454947
YGR046W	TAM41	0.911137	0.770656	1.18229	16.7763	16.5353	0.985631	4.04748	-0.0208803	0.241582
YPL143W	RPL33A	0.368421	0.354267	1.03995	90.8246	89.5174	0.985607	6.4841	-0.0209153	0.0565182
YKL020C	SPT23	1.14	0.931046	1.22443	21.8232	21.5075	0.985535	4.42677	-0.0210215	0.292112
YDR359C	VID21	0.778424	0.789766	0.985638	17.3666	17.1092	0.985181	4.0967	-0.0215399	-0.02087
YDL189W	RBS1	1.11813	1.03549	1.07981	16.7057	16.4575	0.985145	4.04068	-0.0215919	0.110781
YDR472W	TRS31	0.776009	0.81282	0.954711	20.2049	19.9002	0.984922	4.31471	-0.021918	-0.0668634
YPL028W	ERG10	0.885871	0.884755	1.00126	28.5296	28.0995	0.984922	4.81247	-0.0219182	0.00181829
YOR196C	LIP5	1.00989	1.03718	0.973682	17.4883	17.2225	0.984805	4.10622	-0.0220897	-0.0384775
YML073C	RPL6A	0.484447	0.472665	1.02493	94.7357	93.2959	0.984801	6.54374	-0.0220952	0.0355214
YNL094W	APP1	1.21634	1.08137	1.12482	15.8301	15.5886	0.984742	3.96242	-0.0221819	0.16969
YOR052C	YOR052C	1.04323	0.830459	1.25621	61.0643	60.1201	0.984537	5.90978	-0.0224822	0.329079
YDR523C	SPS1	0.616861	0.598027	1.03149	5.4816	5.39268	0.983779	2.431	-0.0235941	0.0447348
YPR054W	SMK1	0.758169	0.750651	1.01002	16.3774	16.1101	0.983681	4.00989	-0.023737	0.0143769
YOL114C	YOL114C	1.09715	0.810433	1.35378	21.2099	20.8614	0.983569	4.38276	-0.0239022	0.436994
YLR344W	RPL26A	0.558937	0.525765	1.06309	79.5485	78.2376	0.983521	6.28979	-0.0239726	0.0882677
YFR014C	CMK1	0.805885	0.741443	1.08691	14.0379	13.8055	0.983451	3.78718	-0.0240755	0.120238
YOR278W	HEM4	0.83561	0.774793	1.07849	17.6575	17.3622	0.983279	4.11788	-0.0243266	0.109019
YIL119C	RPI1	0.228166	0.201701	1.13121	51.9391	51.0655	0.98318	5.67428	-0.0244721	0.177867
YLR297W	YLR297W	0.556465	0.495265	1.12357	27.3635	26.903	0.983171	4.7497	-0.0244854	0.168091
YDR466W	PKH3	1.02645	1.01052	1.01576	19.1671	18.8414	0.983005	4.23583	-0.0247289	0.0225662
YGL041C-B	YGL041C-B	1.37412	1.40517	0.977903	28.7238	28.235	0.98298	4.81941	-0.0247654	-0.0322371
YMR162C	DNF3	0.696338	0.693745	1.00374	11.5083	11.3106	0.98282	3.4996	-0.0250005	0.00538191
YOL043C	NTG2	1.06582	0.976946	1.09097	11.3816	11.1825	0.982499	3.48316	-0.0254724	0.125615
YCL045C	YCL045C	1.01253	0.963225	1.05119	17.1906	16.889	0.982459	4.07801	-0.025531	0.0720204
YKL197C	PEX1	1.23538	1.07024	1.1543	11.0151	10.8206	0.982344	3.4357	-0.0256994	0.207015
YOR051C	YOR051C	0.549094	0.537372	1.02181	19.1852	18.8453	0.982281	4.23613	-0.0257922	0.0311312
YHR186C	KOG1	0.905593	0.930168	0.973579	10.9314	10.7343	0.98197	3.42416	-0.0262498	-0.0386299
YDR054C	CDC34	0.826537	0.759777	1.08787	21.9939	21.5966	0.981937	4.43273	-0.0262982	0.121503
YPR117W	YPR117W	0.977507	0.811047	1.20524	12.8685	12.6357	0.981913	3.65944	-0.0263333	0.269322
YBR120C	CBP6	0.702217	0.737936	0.951596	23.3461	22.92	0.981746	4.51853	-0.0265783	-0.0715789
YDR044W	HEM13	1.2541	1.15734	1.0836	11.2365	11.031	0.981712	3.4635	-0.0266283	0.115837
YDR119W	YDR119W	0.730407	0.722088	1.01152	18.7559	18.4071	0.981405	4.20219	-0.0270802	0.0165258
YPL107W	YPL107W	0.971177	0.933337	1.04054	14.2912	14.023	0.981233	3.80972	-0.0273322	0.057336
YGL232W	TAN1	0.825818	0.741266	1.11406	17.3647	17.0332	0.980908	4.09028	-0.0278098	0.155831
YGR165W	MRPS35	0.697219	0.616192	1.1315	15.5139	15.2168	0.980853	3.92759	-0.0278919	0.178233
YDR451C	YHP1	0.528148	0.538759	0.980304	42.8027	41.9687	0.980515	5.39124	-0.0283885	-0.0286988
YDL114W	YDL114W	1.12018	1.04896	1.06789	6.00031	5.88194	0.980273	2.55629	-0.0287451	0.0947671
YOR106W	VAM3	0.832489	0.727724	1.14396	13.9757	13.6998	0.980262	3.77609	-0.0287605	0.194039
YHR063C	PAN5	0.798185	0.752589	1.06059	14.8502	14.5533	0.980008	3.86327	-0.0291353	0.0848609
YGR027C	RPS25A	0.456725	0.4538	1.00644	120.964	118.537	0.979943	6.8892	-0.0292304	0.00926801
YPR105C	COG4	1.15838	1.09032	1.06243	13.8556	13.5761	0.979832	3.763	-0.0293941	0.0873619
YOR286W	FMP31	1.10851	0.971784	1.1407	23.0113	22.5409	0.979558	4.49447	-0.0297975	0.189921
YNR004W	YNR004W	0.881057	0.826205	1.06639	14.2414	13.9501	0.979546	3.8022	-0.0298144	0.0927357
YBR163W	DEM1	0.867849	0.769494	1.12782	16.698	16.3559	0.979513	4.03174	-0.0298641	0.173533
YBR136W	MEC1	0.746981	0.765178	0.976218	7.89679	7.73363	0.979339	2.95115	-0.0301197	-0.0347247
YGL067W	NPY1	0.960705	0.864358	1.11147	17.2587	16.8972	0.979057	4.07871	-0.0305356	0.152464
YDR332W	IRC3	0.854199	0.893274	0.956256	12.6186	12.3536	0.978998	3.62686	-0.0306225	-0.064531
YLR308W	CDA2	0.888776	0.85263	1.04239	5.52649	5.40992	0.978907	2.43561	-0.030757	0.0598993
YHR165C	PRP8	0.963259	0.894254	1.07716	16.2864	15.9411	0.9788	3.99468	-0.0309139	0.107239
YMR230W	RPS10B	0.564158	0.567186	0.994663	66.2149	64.8109	0.978797	6.01816	-0.0309191	-0.00772079
YBR293W	VBA2	0.992668	0.920368	1.07856	14.34	14.0344	0.978688	3.81089	-0.0310787	0.1091
YGR217W	CCH1	1.12725	1.11155	1.01412	10.012	9.79727	0.97855	3.29238	-0.0312825	0.0202319
YOL142W	RRP40	0.973105	0.957764	1.01602	16.5347	16.1776	0.978404	4.01592	-0.0314979	0.0229255
YPR055W	SEC8	1.15554	1.15047	1.00441	12.4737	12.2043	0.978399	3.60932	-0.0315048	0.0063457
YIL073C	SPO22	0.674423	0.549222	1.22796	8.60583	8.41962	0.978363	3.07376	-0.0315577	0.296265
YIL033C	BCY1	0.988956	0.890616	1.11042	27.7651	27.1598	0.978202	4.7634	-0.0317952	0.151103
YFL052W	YFL052W	0.804173	0.884524	0.909158	3.77354	3.69111	0.978156	1.88406	-0.0318636	-0.137396
YBL091C-A	SCS22	1.2033	1.17673	1.02258	49.9438	48.8407	0.977913	5.61001	-0.0322219	0.0322094
YKL010C	UFD4	0.965491	0.900261	1.07246	15.4298	15.0887	0.977897	3.9154	-0.0322451	0.100921
YPR029C	APL4	1.01222	0.919048	1.10138	19.5619	19.1197	0.977396	4.25699	-0.0329848	0.139309
YOL147C	PEX11	0.913113	0.885627	1.03104	17.4226	17.0272	0.977302	4.08977	-0.0331241	0.044094
YDL109C	YDL109C	1.01747	0.97718	1.04123	11.2642	11.0076	0.97722	3.46043	-0.033245	0.0582917
YNL070W	TOM7	0.616679	0.500681	1.23168	52.5465	51.3403	0.977046	5.68202	-0.0335017	0.300627
YGR049W	SCM4	0.784334	0.786629	0.997084	31.6725	30.9416	0.976923	4.95148	-0.0336826	-0.00421373
YLR395C	COX8	0.812918	0.833475	0.975335	29.8676	29.1753	0.976821	4.86668	-0.0338341	-0.0360299
YAL002W	VPS8	0.646517	0.638527	1.01251	14.4766	14.1395	0.976711	3.82166	-0.0339959	0.0179423
YIL128W	MET18	1.10374	1.08757	1.01487	17.0822	16.6819	0.976567	4.06021	-0.0342096	0.0212935
YDR407C	TRS120	1.08471	0.971714	1.11628	14.6261	14.2827	0.976524	3.8362	-0.0342725	0.158705
YDR434W	GPI17	0.783212	0.807262	0.970208	13.0317	12.7248	0.976448	3.66957	-0.0343855	-0.0436343
YLR263W	RED1	1.22126	1.09802	1.11224	11.6865	11.411	0.976419	3.51235	-0.0344282	0.153465
YDR014W	RAD61	1.18704	1.06274	1.11696	8.23138	8.03673	0.976353	3.00661	-0.0345256	0.159574
YPL051W	ARL3	0.969412	0.829638	1.16847	12.7407	12.4383	0.976261	3.63671	-0.0346618	0.224627
YOR238W	YOR238W	0.761619	0.737344	1.03292	19.5366	19.066	0.975914	4.25293	-0.0351737	0.0467315
YPL019C	VTC3	1.22303	1.22238	1.00053	12.006	11.7152	0.975775	3.5503	-0.0353803	0.000765544
YJL042W	MHP1	0.854493	0.805768	1.06047	18.5355	18.0842	0.975651	4.17666	-0.035563	0.0847037
YML036W	CGI121	1.16452	1.17231	0.993356	20.2231	19.7277	0.975502	4.30215	-0.0357834	-0.00961672
YDR315C	IPK1	1.0074	1.04917	0.960194	11.8788	11.5876	0.975488	3.53451	-0.0358044	-0.0586016
YLR318W	EST2	0.836406	0.8493	0.984818	10.0777	9.82882	0.975304	3.29702	-0.0360765	-0.0220705
YKL018W	SWD2	1.27367	1.17816	1.08107	15.073	14.6996	0.975229	3.87771	-0.036187	0.112457
YLR170C	APS1	1.11167	0.936414	1.18716	36.6212	35.6949	0.974706	5.15765	-0.0369617	0.247511
YDR414C	ERD1	0.871411	0.767658	1.13516	17.0486	16.6165	0.974654	4.05454	-0.0370373	0.182891
YHR101C	BIG1	1.27339	1.2055	1.05632	13.053	12.7219	0.974635	3.66924	-0.0370657	0.0790435
YLR254C	NDL1	0.938819	0.862198	1.08887	19.3664	18.8721	0.974473	4.23818	-0.0373052	0.122829
YCL031C	RRP7	1.02555	0.675136	1.51902	28.5963	27.8613	0.974296	4.80019	-0.0375672	0.603142
YOR148C	SPP2	1.01035	0.910423	1.10976	18.9944	18.5014	0.974048	4.20957	-0.0379345	0.15025
YNL234W	YNL234W	0.698621	0.735228	0.95021	8.79216	8.56275	0.973907	3.09807	-0.0381433	-0.0736824
YLR048W	RPS0B	0.563594	0.473586	1.19006	97.2706	94.7268	0.973848	6.5657	-0.0382308	0.25103
YMR028W	TAP42	0.82463	0.795665	1.0364	16.7775	16.3351	0.973631	4.0299	-0.0385526	0.0515858
YNL214W	PEX17	0.933302	0.857786	1.08804	14.2534	13.8765	0.973557	3.79457	-0.0386624	0.121727
YJL197W	UBP12	0.979539	0.928628	1.05482	13.3602	13.0046	0.973377	3.70094	-0.0389294	0.0770035
YKL205W	LOS1	1.04105	0.95521	1.08986	15.9282	15.503	0.973309	3.95448	-0.03903	0.124145
YOR189W	IES4	0.810001	0.721319	1.12295	15.5096	15.095	0.973268	3.916	-0.0390905	0.167288
YGR134W	CAF130	1.09219	1.03889	1.0513	11.7816	11.4661	0.97322	3.5193	-0.0391619	0.0721761
YGL203C	KEX1	0.948922	0.917858	1.03384	13.2844	12.9282	0.973183	3.69245	-0.0392177	0.0480173
YER089C	PTC2	0.771162	0.609755	1.26471	38.1405	37.1083	0.972938	5.21367	-0.0395808	0.338803
YDR081C	PDC2	1.12599	1.13396	0.992971	13.121	12.7655	0.972909	3.67418	-0.0396239	-0.0101761
YDR333C	YDR333C	0.697171	0.597832	1.16617	17.8355	17.3507	0.97282	4.11692	-0.0397555	0.221773
YOL164W	BDS1	1.21413	1.12351	1.08066	11.7267	11.4079	0.972819	3.51196	-0.0397571	0.111916
YGR102C	YGR102C	0.861294	0.807245	1.06695	18.2212	17.7167	0.972312	4.14704	-0.0405081	0.0934988
YPL249C	GYP5	0.933218	0.824742	1.13153	18.7487	18.2295	0.972306	4.1882	-0.0405173	0.178272
YEL049W	PAU2	1.1631	1.14737	1.01371	11.2213	10.9083	0.972106	3.44736	-0.0408147	0.0196514
YIL140W	AXL2	0.759247	0.672014	1.12981	15.9487	15.4973	0.971698	3.95394	-0.0414199	0.176077
YKL175W	ZRT3	1.06461	1.04773	1.01611	18.2232	17.7053	0.971581	4.14611	-0.0415938	0.0230584
YOR212W	STE4	0.502154	0.483246	1.03913	35.6374	34.6234	0.971548	5.11368	-0.0416435	0.0553714
YDR183W	PLP1	1.02704	0.967844	1.06116	9.3502	9.08378	0.971506	3.18329	-0.0417047	0.0856459
YPL149W	ATG5	0.748022	0.653168	1.14522	18.4728	17.9432	0.971326	4.16536	-0.0419719	0.195625
YPL259C	APM1	0.777555	0.739336	1.05169	20.7494	20.1518	0.971201	4.33284	-0.0421575	0.0727141
YBR200W	BEM1	0.900409	0.777695	1.15779	10.9746	10.6574	0.9711	3.41379	-0.0423081	0.211375
YPR121W	THI22	1.45173	1.29499	1.12104	12.2791	11.9231	0.971006	3.57568	-0.0424482	0.164835
YDR331W	GPI8	0.89935	0.84713	1.06164	18.4823	17.9456	0.970962	4.16556	-0.0425135	0.0862995
YGL080W	FMP37	0.944564	0.834055	1.1325	17.6012	17.0874	0.970806	4.09486	-0.0427458	0.179506
YNL136W	EAF7	1.05729	0.995094	1.0625	21.3923	20.7664	0.97074	4.37618	-0.0428437	0.0874641
YJR005C-A	YJR005C-A	0.89953	0.875271	1.02772	7.097	6.8869	0.970396	2.78386	-0.0433539	0.0394409
YDR007W	TRP1	0.926211	0.801502	1.15559	26.6544	25.8632	0.970318	4.69283	-0.0434699	0.208634
YGL169W	SUA5	0.542637	0.531036	1.02185	10.7419	10.4227	0.970284	3.38166	-0.0435213	0.0311774
YNL073W	MSK1	1.07739	1.03733	1.03862	17.1035	16.5947	0.970251	4.05265	-0.0435705	0.0546642
YAL022C	FUN26	0.899291	0.878499	1.02367	13.2745	12.8763	0.970007	3.68665	-0.0439327	0.0337478
YOR149C	SMP3	1.03499	1.02668	1.0081	9.29802	9.01893	0.969985	3.17296	-0.0439663	0.0116375
YNL162W-A	YNL162W-A	1.11319	1.00419	1.10855	10.5081	10.1879	0.969527	3.34879	-0.0446466	0.148668
YOL030W	GAS5	1.10801	1.02489	1.0811	23.8863	23.1583	0.969524	4.53346	-0.0446515	0.112496
YNL295W	YNL295W	1.35019	1.28922	1.04729	13.6239	13.2086	0.96952	3.72341	-0.0446568	0.0666654
YOR280C	FSH3	1.04023	0.974336	1.06763	10.6729	10.3443	0.969215	3.37077	-0.0451112	0.0944159
YNL225C	CNM67	0.647178	0.654366	0.989016	12.2885	11.9076	0.969004	3.57381	-0.0454258	-0.0159349
YIL115C	NUP159	0.654064	0.61824	1.05795	16.3561	15.8486	0.968971	3.98628	-0.0454749	0.0812663
YLR361C	DCR2	0.898606	0.980933	0.916073	13.8316	13.4024	0.968966	3.74442	-0.0454814	-0.126466
YHR005C-A	MRS11	0.69137	0.630716	1.09617	99.8264	96.7266	0.968948	6.59584	-0.0455092	0.132466
YHR086W	NAM8	0.863442	0.799301	1.08025	17.7479	17.1964	0.968923	4.10403	-0.045546	0.111361
YLR004C	THI73	1.21865	1.06899	1.14001	10.1152	9.80043	0.968885	3.29285	-0.0456031	0.189043
YPR084W	YPR084W	0.97643	0.9875	0.988789	11.4211	11.0609	0.968457	3.46739	-0.0462399	-0.0162648
YLR104W	YLR104W	1.24043	1.2053	1.02915	19.6838	19.0575	0.968184	4.25229	-0.0466469	0.0414535
YNL096C	RPS7B	0.494142	0.428074	1.15434	79.1817	76.6534	0.968069	6.26028	-0.0468182	0.207066
YGR209C	TRX2	0.999745	0.918042	1.089	56.9999	55.1459	0.967474	5.78518	-0.0477052	0.123
YKL094W	YJU3	1.12988	0.981123	1.15162	27.6516	26.7518	0.96746	4.74156	-0.0477254	0.203664
YER017C	AFG3	0.933424	0.882444	1.05777	18.2296	17.6319	0.967214	4.14012	-0.0480924	0.0810279
YHR058C	MED6	1.19835	1.19655	1.00151	13.8674	13.4074	0.966826	3.74495	-0.0486717	0.00217149
YDR328C	SKP1	1.09219	0.997114	1.09535	16.8924	16.3298	0.966699	4.02944	-0.0488616	0.131392
YIL079C	AIR1	0.894311	0.875455	1.02154	15.6711	15.1489	0.966679	3.92114	-0.0488917	0.0307438
YKL093W	MBR1	0.652007	0.629755	1.03533	12.8046	12.3774	0.966635	3.62963	-0.0489571	0.050095
YOR353C	SOG2	0.773979	0.733419	1.0553	13.1271	12.6863	0.96642	3.6652	-0.0492782	0.0776554
YPL272C	YPL272C	1.04635	0.937262	1.11639	10.7978	10.4261	0.965569	3.38212	-0.0505485	0.158838
YDL072C	YET3	0.867463	0.742434	1.1684	33.248	32.1013	0.965509	5.00456	-0.0506379	0.22454
YHR207C	SET5	0.986424	0.855123	1.15355	11.115	10.7313	0.965481	3.42375	-0.0506799	0.206076
YBR060C	ORC2	0.820633	0.778043	1.05474	16.4484	15.88	0.965446	3.98914	-0.0507319	0.076887
YHR167W	THP2	1.03033	0.984705	1.04633	17.9184	17.2948	0.965197	4.11226	-0.0511048	0.0653374
YIR003W	YIR003W	1.171	1.09474	1.06966	13.4803	13.0094	0.965067	3.70148	-0.0512984	0.0971473
YJL012C	VTC4	1.26551	1.04128	1.21534	13.0782	12.6193	0.964911	3.65756	-0.0515325	0.281363
YGR220C	MRPL9	0.844291	0.8772	0.962484	22.7375	21.9395	0.964905	4.45546	-0.0515408	-0.0551656
YOR096W	RPS7A	0.460984	0.438961	1.05017	99.6966	96.1922	0.96485	6.58785	-0.0516241	0.070625
YDR323C	PEP7	1.01115	0.922772	1.09578	11.3102	10.9124	0.964827	3.4479	-0.0516577	0.131955
YMR073C	YMR073C	1.04227	1.03847	1.00365	28.244	27.2503	0.964817	4.7682	-0.0516723	0.00525762
YDR185C	YDR185C	0.567459	0.565023	1.00431	17.7328	17.1086	0.964798	4.09665	-0.0517005	0.00620866
YER027C	GAL83	1.11529	1.0932	1.02021	14.9502	14.4235	0.96477	3.85035	-0.0517433	0.0288597
YBR096W	YBR096W	0.996527	0.904929	1.10122	21.7567	20.9895	0.964739	4.3916	-0.0517898	0.139105
YER093C	TSC11	1.28488	1.08308	1.18631	13.4877	13.0111	0.964664	3.70167	-0.051902	0.246486
YJR075W	HOC1	1.15306	1.04129	1.10734	21.9292	21.1474	0.964348	4.40241	-0.0523738	0.147101
YLR052W	IES3	1.12261	1.06651	1.05261	17.8122	17.1745	0.964201	4.1022	-0.0525948	0.073966
YIL118W	RHO3	0.476877	0.424934	1.12224	31.8298	30.6901	0.964195	4.9397	-0.0526025	0.166378
YLR398C	SKI2	0.651022	0.63395	1.02693	15.6774	15.1152	0.96414	3.91793	-0.0526859	0.0383366
YDL115C	IWR1	1.22608	1.18624	1.03359	14.4788	13.9595	0.964133	3.80318	-0.0526955	0.0476647
YKL176C	LST4	1.05914	0.900054	1.17675	18.1688	17.5141	0.963965	4.13044	-0.0529469	0.234808
YPR094W	RDS3	1.12751	1.04885	1.075	18	17.3504	0.963914	4.1169	-0.0530242	0.104335
YDR541C	YDR541C	0.839244	0.738661	1.13617	10.8891	10.4956	0.963857	3.39171	-0.0531087	0.184178
YAR019C	CDC15	1.60334	1.41248	1.13512	10.0377	9.67385	0.963756	3.27409	-0.0532595	0.182846
YOR269W	PAC1	1.01783	0.949105	1.07241	14.1761	13.6588	0.963504	3.77176	-0.0536375	0.100855
YDL002C	NHP10	0.869646	0.786936	1.1051	15.7194	15.1448	0.963443	3.92075	-0.0537283	0.144181
YKR031C	SPO14	1.2533	1.23556	1.01436	13.4731	12.9791	0.963334	3.69812	-0.0538922	0.0205682
YOR288C	MPD1	0.819002	0.760976	1.07625	11.3727	10.9536	0.963151	3.45334	-0.0541657	0.106017
YPR063C	YPR063C	1.21713	1.12501	1.08189	30.0951	28.9855	0.963132	4.85726	-0.0541945	0.113549
YDR454C	GUK1	1.03198	0.974026	1.0595	18.8191	18.1226	0.962988	4.17972	-0.0544099	0.0833848
YMR299C	DYN3	0.673043	0.625496	1.07601	16.2267	15.6236	0.962833	3.96566	-0.054643	0.105697
YIR009W	MSL1	1.20068	1.12209	1.07003	15.863	15.2728	0.962796	3.93289	-0.0546982	0.0976571
YKL098W	YKL098W	1.02355	1.03594	0.988046	11.4109	10.9862	0.962785	3.45762	-0.0547142	-0.0173503
YJL097W	PHS1	0.779141	0.805932	0.966758	18.5708	17.8789	0.962745	4.16019	-0.0547745	-0.0487731
YPL021W	ECM23	0.969983	0.927507	1.0458	3.81129	3.66904	0.962676	1.8754	-0.0548777	0.0646012
YBR058C-A	TSC3	0.923945	0.83123	1.11154	20.0354	19.2851	0.962552	4.26941	-0.0550635	0.15256
YPL249C-A	RPL36B	0.690888	0.630357	1.09603	118.852	114.368	0.962272	6.83753	-0.055484	0.132284
YLR210W	CLB4	1.17271	1.17356	0.99928	11.8931	11.4439	0.962228	3.51651	-0.0555493	-0.00103961
YGR068C	YGR068C	0.752112	0.705833	1.06557	13.5221	13.0112	0.962218	3.70168	-0.0555638	0.0916214
YIL063C	YRB2	0.98849	0.903961	1.09351	17.8628	17.1877	0.962207	4.10331	-0.0555815	0.128965
YAL011W	SWC3	1.24165	1.17957	1.05263	15.6598	15.0588	0.961622	3.91254	-0.0564587	0.0739925
YIL020C	HIS6	1.02671	0.95217	1.07829	16.5601	15.9195	0.961318	3.99273	-0.0569139	0.108745
YOL003C	PFA4	0.908021	0.841603	1.07892	11.9946	11.5302	0.961279	3.52735	-0.0569723	0.109586
YKL171W	YKL171W	0.734916	0.805027	0.912908	15.1734	14.5833	0.961115	3.86625	-0.0572191	-0.131458
YDL217C	TIM22	0.893916	0.818873	1.09164	19.3105	18.5591	0.961091	4.21406	-0.0572544	0.126501
YPL066W	YPL066W	0.392793	0.393108	0.999199	26.556	25.5205	0.961006	4.67358	-0.057383	-0.00115574
YPL180W	TCO89	0.914227	0.878163	1.04107	15.7269	15.1133	0.960984	3.91775	-0.0574153	0.058064
YPR131C	NAT3	0.608196	0.568447	1.06993	18.5999	17.8734	0.960943	4.15974	-0.0574768	0.0975105
YNR040W	YNR040W	1.02924	1.05315	0.977291	12.5499	12.0579	0.960798	3.5919	-0.0576951	-0.0331394
YER169W	RPH1	0.622484	0.623498	0.998374	14.4986	13.9295	0.960747	3.80007	-0.057772	-0.00234776
YDR168W	CDC37	1.10669	1.07309	1.03131	15.4897	14.881	0.960708	3.8954	-0.05783	0.0444819
YNL072W	RNH201	0.945074	0.96284	0.981549	20.0582	19.2689	0.960648	4.2682	-0.05792	-0.0268679
YGL017W	ATE1	1.19547	1.14228	1.04657	11.7908	11.3237	0.960388	3.50128	-0.0583107	0.0656622
YKR053C	YSR3	1.11191	0.976024	1.13923	31.9718	30.7005	0.960238	4.94019	-0.0585368	0.188053
YMR172W	HOT1	0.732169	0.693484	1.05578	9.59746	9.21572	0.960226	3.2041	-0.0585548	0.0783145
YDR514C	YDR514C	0.862205	0.857852	1.00507	16.645	15.9815	0.960135	3.99833	-0.0586906	0.00730138
YOL141W	PPM2	1.07953	1.07868	1.00078	7.29777	7.0067	0.960116	2.80874	-0.05872	0.00112499
YPL173W	MRPL40	1.09997	1.075	1.02323	13.5353	12.9891	0.959649	3.69923	-0.0594208	0.0331235
YML054C	CYB2	1.16805	1.13928	1.02525	13.3033	12.7603	0.959177	3.67359	-0.0601316	0.0359818
[truncated: 2,745 more rows]

## Sheet: All genes
Systematic name	Common name	H3-U	H3-I	H3-U/H3-I	Rpb3-U	Rpb3-I	Rpb3-I/Rpb3-U	log2(Rpb3-I)	log2(Rpb3-I/Rpb3-U)	log2(H3-U/H3-I)
YMR251W-A	HOR7	0.351355	0.057515	6.10894	182.297	591.731	3.24598	9.2088	1.69865	2.61092
YNL104C	LEU4	0.636821	0.119635	5.32305	25.395	137.07	5.39752	7.09877	2.4323	2.41225
YPR036W-A	YPR036W-A	0.338228	0.074911	4.51507	286.329	1225.22	4.27905	10.2588	2.09729	2.17475
YPL250C	ICY2	0.63785	0.156232	4.08272	44.0565	530.169	12.0338	9.05031	3.58903	2.02953
YOL058W	ARG1	0.742973	0.188794	3.93536	22.2295	554.593	24.9485	9.11528	4.64088	1.97649
YCL030C	HIS4	0.952517	0.286274	3.32729	24.8586	344.935	13.8759	8.43018	3.79451	1.73435
YBR145W	ADH5	1.05289	0.317974	3.31124	11.9106	147.648	12.3963	7.20602	3.63184	1.72737
YOR130C	ORT1	1.27451	0.421851	3.02124	12.8572	50.7743	3.94908	5.66603	1.98152	1.59514
YHR018C	ARG4	0.951041	0.360557	2.6377	38.5199	582.275	15.1162	9.18556	3.91803	1.39928
YOL119C	MCH4	1.18276	0.449968	2.62854	10.0832	100.16	9.93338	6.64617	3.31229	1.39426
YDR380W	ARO10	0.878147	0.352115	2.49392	19.4614	118.055	6.06609	6.88331	2.60077	1.31841
YGL117W	YGL117W	1.04504	0.429063	2.43562	27.5074	205.407	7.46731	7.68234	2.90059	1.28429
YJL088W	ARG3	0.440281	0.182799	2.40855	12.29	367.468	29.8998	8.52148	4.90206	1.26816
YGR161C	RTS3	0.517818	0.21772	2.37836	14.0149	70.4884	5.02954	6.13931	2.33043	1.24997
YER052C	HOM3	0.70626	0.298351	2.36721	22.7478	164.341	7.22449	7.36055	2.8529	1.24319
YIL050W	PCL7	0.768686	0.32778	2.34513	26.7831	30.9143	1.15425	4.9502	0.206953	1.22967
YIL051C	MMF1	0.773678	0.330911	2.33802	83.9686	186.542	2.22157	7.54335	1.15158	1.22529
YER069W	ARG5,6	0.692556	0.301915	2.29388	15.7712	248.049	15.728	7.95448	3.97526	1.19779
YHR022C	YHR022C	0.851535	0.386717	2.20196	14.7379	46.3921	3.14782	5.53581	1.65435	1.13879
YDR127W	ARO1	0.925387	0.424035	2.18234	20.729	58.8663	2.83981	5.87937	1.50579	1.12587
YDL182W	LYS20	0.509521	0.238126	2.13971	33.8397	141.922	4.19395	7.14895	2.06831	1.09741
YDL131W	LYS21	0.527599	0.255831	2.06229	24.329	76.7419	3.15434	6.26194	1.65734	1.04425
YDR354W	TRP4	0.86926	0.424942	2.0456	14.999	59.3932	3.95981	5.89223	1.98543	1.03252
YIL116W	HIS5	0.780858	0.386975	2.01785	23.6527	239.192	10.1126	7.90202	3.33809	1.01282
YER055C	HIS1	0.564525	0.281287	2.00694	40.8129	152.627	3.73967	7.25386	1.90291	1.005
YOR303W	CPA1	0.558719	0.281351	1.98585	35.2306	240.982	6.84014	7.91278	2.77403	0.989753
YLR120C	YPS1	1.01997	0.515041	1.98037	25.1688	57.6151	2.28914	5.84837	1.19481	0.985768
YPL252C	YAH1	0.749151	0.378475	1.97939	17.4219	76.157	4.37133	6.2509	2.12807	0.985056
YNL125C	ESBP6	0.815081	0.412527	1.97583	13.5788	42.8247	3.15378	5.42037	1.65708	0.982457
YMR062C	ECM40	1.2115	0.618704	1.95812	13.9592	200.168	14.3395	7.64507	3.84192	0.969468
YLR417W	VPS36	1.11428	0.588166	1.8945	17.3783	14.1866	0.816341	3.82646	-0.292756	0.921814
YBR249C	ARO4	0.627633	0.331298	1.89447	29.0517	92.0736	3.1693	6.52472	1.66416	0.921794
YJL159W	HSP150	0.482265	0.256548	1.87982	280.016	447.011	1.59638	8.80417	0.6748	0.910597
YGL032C	AGA2	0.603661	0.32553	1.8544	45.9626	235.528	5.12434	7.87976	2.35737	0.89095
YHR162W	YHR162W	0.692554	0.375085	1.84639	76.0119	346.271	4.55549	8.43576	2.18761	0.884707
YHR161C	YAP1801	0.692554	0.375085	1.84639	15.3187	35.0292	2.28669	5.13049	1.19326	0.884707
YFR005C	SAD1	0.848945	0.46201	1.8375	15.9944	18.7787	1.17408	4.23103	0.231528	0.877747
YFR006W	YFR006W	0.848945	0.46201	1.8375	12.4623	17.399	1.39613	4.12093	0.481432	0.877747
YDR074W	TPS2	0.79702	0.436439	1.82619	58.3302	108.891	1.8668	6.76674	0.900567	0.868834
YGR121C	MEP1	0.753057	0.414574	1.81646	19.8819	17.6549	0.887989	4.142	-0.171386	0.861128
YDR040C	ENA1	0.936736	0.518173	1.80776	17.7149	21.5517	1.21658	4.42973	0.282835	0.854207
YCR005C	CIT2	0.586524	0.324598	1.80693	84.1157	219.124	2.60503	7.7756	1.3813	0.853537
YMR194C-B	YMR194C-B	0.520169	0.289009	1.79984	249.304	151.183	0.606421	7.24015	-0.721607	0.847865
YPL264C	YPL264C	0.849899	0.476998	1.78177	14.7915	54.2887	3.67027	5.76258	1.87589	0.833308
YOR337W	TEA1	0.51709	0.290545	1.77972	10.5764	30.4709	2.88102	4.92936	1.52658	0.831653
YNL103W	MET4	0.846176	0.47736	1.77262	20.8951	28.0991	1.34477	4.81245	0.427358	0.825879
YKL211C	TRP3	1.04506	0.590803	1.76888	19.6763	80.2439	4.07821	6.32632	2.02794	0.822837
YLR258W	GSY2	1.00763	0.570507	1.76621	30.9979	65.5981	2.11621	6.03558	1.08148	0.820653
YBR248C	HIS7	0.845242	0.479818	1.76159	20.1397	68.728	3.41256	6.10283	1.77085	0.816879
YIL015W	BAR1	0.636174	0.361402	1.76029	79.0387	172.781	2.18603	7.4328	1.12832	0.815816
YOL057W	YOL057W	1.07125	0.612646	1.74856	13.5344	28.1717	2.08148	4.81618	1.05761	0.806169
YGL184C	STR3	0.572033	0.327819	1.74497	7.19569	127.179	17.6743	6.99072	4.14358	0.803201
YPL135W	ISU1	0.727203	0.419555	1.73327	54.4166	181.715	3.33932	7.50553	1.73956	0.793498
YFL026W	STE2	0.377084	0.218179	1.72832	193.169	379.666	1.96546	8.56859	0.974865	0.789372
YNL098C	RAS2	0.47968	0.280281	1.71143	35.2336	52.699	1.4957	5.7197	0.580824	0.775199
YNL160W	YGP1	0.504083	0.294912	1.70927	98.0237	102.84	1.04914	6.68426	0.0692047	0.773376
YPL137C	GIP3	0.77893	0.463388	1.68095	22.4564	25.3354	1.1282	4.66308	0.174026	0.749273
YOL084W	PHM7	1.01641	0.605239	1.67936	16.0852	41.9224	2.60627	5.38965	1.38199	0.747908
YOR304W	ISW2	0.75538	0.450283	1.67757	13.9507	12.4581	0.893008	3.63901	-0.163255	0.746372
YHR097C	YHR097C	0.875182	0.52478	1.66771	20.1858	36.4915	1.80778	5.18949	0.854218	0.737871
YOR032W-A	YOR032W-A	0.20226	0.121398	1.66609	30.8713	26.6725	0.863992	4.73728	-0.21091	0.73647
YJR109C	CPA2	0.632834	0.380434	1.66345	20.3321	328.827	16.1728	8.36118	4.01549	0.734182
YJR110W	YMR1	0.632834	0.380434	1.66345	13.9706	27.559	1.97265	4.78445	0.980132	0.734182
YDR259C	YAP6	0.207954	0.125291	1.65977	7.85003	8.97322	1.14308	3.16563	0.192927	0.730988
YMR008C	PLB1	0.93541	0.56489	1.65591	12.3082	18.7974	1.52722	4.23246	0.610911	0.727628
YOR230W	WTM1	0.730551	0.44158	1.6544	27.4168	63.32	2.30953	5.98459	1.2076	0.726312
YDR379C-A	YDR379C-A	0.969624	0.586216	1.65404	21.2893	50.6427	2.37879	5.66228	1.25023	0.725992
YNL192W	CHS1	0.743626	0.449618	1.65391	26.2248	48.7056	1.85723	5.60602	0.893154	0.725879
YHR087W	YHR087W	0.608814	0.369008	1.64987	70.214	118.826	1.69234	6.89271	0.759023	0.72235
YOR221C	MCT1	1.12736	0.685588	1.64437	11.3911	39.5409	3.47122	5.30527	1.79544	0.717532
YOR222W	ODC2	1.12736	0.685588	1.64437	51.2246	122.026	2.38218	6.93105	1.25228	0.717532
YFL016C	MDJ1	0.434605	0.266616	1.63007	26.1912	20.6389	0.78801	4.3673	-0.343714	0.704938
YFL014W	HSP12	0.434605	0.266616	1.63007	98.7664	247.727	2.50821	7.95261	1.32666	0.704938
YIL101C	XBP1	0.469193	0.289628	1.61999	21.6405	33.4493	1.54568	5.0639	0.628243	0.695981
YGR122W	YGR122W	0.893388	0.557239	1.60324	14.002	18.6643	1.33297	4.22221	0.414648	0.680989
YER053C	PIC2	0.914523	0.570618	1.60269	27.0822	84.4557	3.1185	6.40012	1.64085	0.680493
YGR044C	RME1	0.866245	0.542044	1.59811	18.1002	21.9669	1.21363	4.45726	0.279326	0.676366
YER175C	TMT1	0.755892	0.473955	1.59486	16.1812	190.493	11.7725	7.57359	3.55734	0.673429
YNR069C	BSC5	0.987344	0.621509	1.58862	10.0576	36.8345	3.66235	5.20299	1.87277	0.667777
YHR023W	MYO1	0.73821	0.464744	1.58842	16.2266	21.2038	1.30673	4.40625	0.385959	0.667595
YDL022W	GPD1	0.298947	0.188868	1.58284	77.7114	139.743	1.79823	7.12663	0.846578	0.662515
YOL059W	GPD2	0.746575	0.473249	1.57755	35.8578	58.6308	1.63509	5.87359	0.709373	0.65769
YDR043C	NRG1	0.30091	0.191004	1.57541	50.9796	109.86	2.15498	6.77953	1.10768	0.65573
YLR355C	ILV5	0.619669	0.396522	1.56276	314.065	522.153	1.66256	9.02833	0.733408	0.644097
YOL052C-A	DDR2	0.532094	0.341725	1.55709	53.8067	136.703	2.54063	7.0949	1.34519	0.638848
YNR044W	AGA1	0.924404	0.596438	1.54988	27.4632	102.641	3.73741	6.68146	1.90204	0.632152
YPL265W	DIP5	0.389702	0.251785	1.54776	42.6324	64.4745	1.51234	6.01066	0.596778	0.630179
YBR201C-A	YBR201C-A	0.635956	0.411562	1.54522	12.4767	10.9066	0.874157	3.44712	-0.194036	0.627815
YJR148W	BAT2	0.642508	0.417125	1.54032	11.8984	30.5963	2.57146	4.93528	1.36259	0.623234
YLL055W	YLL055W	1.37715	0.895265	1.53826	9.03932	15.2001	1.68156	3.92601	0.749797	0.621298
YLR452C	SST2	0.653187	0.425292	1.53585	45.4087	114.634	2.5245	6.84089	1.336	0.619041
YKR013W	PRY2	0.903678	0.588754	1.5349	50.969	79.4087	1.55798	6.31123	0.639676	0.618143
YGL202W	ARO8	0.593927	0.387175	1.534	21.4989	65.4377	3.04377	6.03205	1.60586	0.617299
YHR005C	GPA1	0.481099	0.313714	1.53356	36.4437	46.7257	1.28213	5.54614	0.358546	0.616886
YAL040C	CLN3	0.478119	0.312098	1.53195	62.2166	37.5687	0.603837	5.23146	-0.727768	0.615372
YLL048C	YBT1	0.815457	0.533715	1.52789	17.6319	39.7526	2.25458	5.31298	1.17286	0.61154
YCL031C	RRP7	1.02555	0.675136	1.51902	28.5963	27.8613	0.974296	4.80019	-0.0375672	0.603142
YNL036W	NCE103	0.479931	0.318022	1.50911	49.253	212.556	4.3156	7.7317	2.10956	0.593699
YNL037C	IDH1	0.479931	0.318022	1.50911	22.5045	52.026	2.3118	5.70116	1.20902	0.593699
YIL117C	PRM5	0.619215	0.410425	1.50872	15.4725	63.4732	4.10232	5.98808	2.03644	0.593322
YIL055C	YIL055C	0.327478	0.217523	1.50549	9.64197	21.8489	2.26602	4.44949	1.18016	0.590229
YER028C	MIG3	0.460844	0.306415	1.50399	14.5385	16.4664	1.13261	4.04146	0.179647	0.588791
YGR161W-C	YGR161W-C	0.958814	0.637978	1.50289	24.0473	36.4163	1.51436	5.18651	0.598712	0.587744
YOL158C	ENB1	0.535303	0.357696	1.49653	14.7994	21.8941	1.47939	4.45247	0.565005	0.58162
YGL186C	TPN1	0.961277	0.646707	1.48642	15.0346	32.2093	2.14234	5.00941	1.09919	0.571841
YHR163W	SOL3	0.83229	0.561894	1.48122	24.3055	45.466	1.8706	5.50671	0.903502	0.56679
YDL025C	YDL025C	1.27128	0.858507	1.48081	13.5679	50.0975	3.69236	5.64667	1.88454	0.566383
YJL160C	YJL160C	0.808525	0.546031	1.48073	19.8847	26.4511	1.33022	4.72525	0.411667	0.56631
YBR046C	ZTA1	1.07232	0.725639	1.47777	10.1659	29.622	2.91386	4.8886	1.54293	0.563418
YBR047W	FMP23	1.07232	0.725639	1.47777	8.3055	37.6446	4.53249	5.23437	2.1803	0.563418
YGR088W	CTT1	0.949232	0.643204	1.47579	20.7265	49.998	2.41227	5.6438	1.27039	0.561483
YPL058C	PDR12	0.494284	0.33503	1.47534	23.2947	34.8782	1.49726	5.12425	0.582321	0.561051
YNR001C	CIT1	0.688704	0.467687	1.47258	37.8908	47.4549	1.25241	5.56849	0.324709	0.558342
YDR034C	LYS14	1.06408	0.724006	1.46972	23.5713	39.316	1.66796	5.29705	0.738088	0.555538
YLR090W	XDJ1	1.14056	0.77918	1.4638	13.3486	22.34	1.67358	4.48156	0.742937	0.549719
YPL089C	RLM1	0.815595	0.557408	1.46319	20.95	31.2608	1.49216	4.96628	0.577403	0.549121
YPL088W	YPL088W	0.814312	0.55734	1.46107	16.2204	24.4096	1.50487	4.60938	0.589641	0.547024
YBR146W	MRPS9	0.903295	0.619688	1.45766	19.4817	38.0242	1.95179	5.24885	0.9648	0.543654
YGL248W	PDE1	0.668794	0.458916	1.45733	17.0846	32.6441	1.91073	5.02875	0.934126	0.543331
YBR218C	PYC2	0.447208	0.307807	1.45289	19.3846	68.9253	3.55568	6.10696	1.83013	0.538922
YNL134C	YNL134C	0.770514	0.531456	1.44982	34.9118	51.4191	1.47283	5.68423	0.55859	0.535871
YKL035W	UGP1	0.713117	0.491942	1.4496	68.8843	161.298	2.34158	7.33358	1.22748	0.535651
YLR304C	ACO1	0.639576	0.441818	1.4476	38.8707	96.9959	2.49535	6.59985	1.31924	0.533666
YNL241C	ZWF1	0.517615	0.359731	1.43889	27.7294	51.7612	1.86665	5.6938	0.900454	0.524958
YHR094C	HXT1	0.67134	0.466692	1.43851	109.412	147.716	1.3501	7.20669	0.433064	0.524574
YMR305C	SCW10	0.487669	0.339038	1.43839	53.4496	82.696	1.54718	6.36975	0.629639	0.524453
YMR306W	FKS3	0.487669	0.339038	1.43839	11.624	8.78766	0.755994	3.13548	-0.403552	0.524453
YKR042W	UTH1	0.259526	0.180856	1.43499	161.881	188.629	1.16523	7.55941	0.220612	0.521038
YKR041W	YKR041W	0.550641	0.383971	1.43407	6.22378	3.82992	0.615369	1.93731	-0.700476	0.520115
YER081W	SER3	0.4955	0.346292	1.43087	70.5771	109.966	1.55809	6.78091	0.639783	0.516898
YPL221W	FLC1	0.53612	0.374772	1.43052	41.7917	46.2222	1.10601	5.53052	0.14537	0.516542
YDR531W	YDR531W	0.856435	0.599766	1.42795	13.9604	29.8263	2.13648	4.89851	1.09524	0.513945
YJL116C	NCA3	0.583374	0.408735	1.42727	12.9535	10.3276	0.797281	3.36843	-0.32684	0.513255
YGR023W	MTL1	0.95674	0.670966	1.42591	11.0927	18.237	1.64405	4.18879	0.717252	0.511887
YPL145C	KES1	0.733919	0.515121	1.42475	28.9659	25.6055	0.883986	4.67838	-0.177905	0.510708
YPL144W	YPL144W	0.733919	0.515121	1.42475	84.2239	25.1446	0.298545	4.65218	-1.74398	0.510708
YDL198C	GGC1	0.861545	0.605475	1.42292	29.1075	143.812	4.94073	7.16804	2.30472	0.508857
YBR202W	CDC47	0.821225	0.577341	1.42243	16.7849	12.6596	0.754228	3.66216	-0.406927	0.508355
YLL028W	TPO1	0.409633	0.288551	1.41962	30.249	64.9876	2.14842	6.02209	1.10328	0.505509
YDL021W	GPM2	0.853909	0.602324	1.41769	22.8435	29.7892	1.30406	4.89672	0.383006	0.503542
YGR008C	STF2	0.829818	0.585976	1.41613	62.9838	94.1979	1.49559	6.55762	0.580714	0.501954
YJR154W	YJR154W	0.895518	0.632744	1.41529	9.60745	22.3564	2.32698	4.48261	1.21846	0.501101
YLR257W	YLR257W	0.575937	0.407113	1.41469	54.8379	68.7175	1.2531	6.1026	0.325503	0.500482
YMR121C	RPL15B	0.722507	0.513763	1.4063	25.7681	36.4335	1.4139	5.18719	0.49968	0.491909
YPL092W	SSU1	0.822628	0.585524	1.40495	15.9414	41.9049	2.62869	5.38905	1.39434	0.490514
YDR524C-B	YDR524C-B	0.30592	0.218071	1.40285	394.834	377.782	0.956811	8.56141	-0.0636936	0.488358
YJR059W	PTK2	1.06161	0.756896	1.40258	25.4064	35.4934	1.39703	5.14948	0.482358	0.488082
YIL052C	RPL34B	0.37408	0.266884	1.40166	91.3694	80.6475	0.882654	6.33356	-0.180081	0.487136
YKL209C	STE6	0.483298	0.346093	1.39644	48.1845	65.0435	1.34988	6.02333	0.432835	0.481753
YCL055W	KAR4	0.799473	0.574887	1.39066	43.4259	51.8236	1.19338	5.69554	0.255054	0.475772
YBR085C-A	YBR085C-A	0.926402	0.66714	1.38862	50.8332	96.0235	1.88899	6.58532	0.917618	0.473648
YMR122W-A	YMR122W-A	0.594686	0.428548	1.38768	229.115	274.571	1.1984	8.10103	0.261107	0.472673
YBR066C	NRG2	0.457055	0.329839	1.38569	28.3986	38.1997	1.34513	5.25549	0.427741	0.470606
YOR044W	YOR044W	0.638395	0.462756	1.37955	20.1241	47.2553	2.34819	5.5624	1.23155	0.464198
YOL060C	MAM3	0.698084	0.506935	1.37707	18.4497	18.5704	1.00654	4.21493	0.00940571	0.4616
YGR202C	PCT1	0.743284	0.539793	1.37698	18.5477	24.2116	1.30537	4.59763	0.384459	0.461508
YDR158W	HOM2	0.69318	0.503416	1.37695	32.6019	122.365	3.75332	6.93505	1.90817	0.46148
YMR019W	STB4	1.10087	0.799639	1.37671	12.4205	19.3557	1.55837	4.27469	0.64004	0.461223
YMR120C	ADE17	0.756598	0.549847	1.37601	15.799	45.3486	2.87034	5.50299	1.52122	0.460496
YFL027C	GYP8	0.740128	0.538033	1.37562	17.8723	40.6482	2.27437	5.34512	1.18547	0.46008
YGR203W	YGR203W	0.749679	0.54781	1.3685	21.6549	15.3702	0.709781	3.94207	-0.494553	0.452596
YML101C	CUE4	0.485407	0.35518	1.36665	26.8949	16.4808	0.612787	4.04272	-0.706544	0.450644
YML100W	TSL1	0.485407	0.35518	1.36665	59.7753	108.881	1.8215	6.76661	0.865128	0.450644
YPR145W	ASN1	0.478991	0.351143	1.36409	34.2257	234.533	6.85254	7.87365	2.77664	0.447939
YML076C	WAR1	0.895821	0.656754	1.36401	13.3593	20.8574	1.56127	4.38249	0.642719	0.447858
YLL027W	ISA1	0.49539	0.363424	1.36312	23.5923	58.7599	2.49064	5.87676	1.31652	0.446909
YDR525W-A	SNA2	0.256701	0.188853	1.35927	43.5371	57.5892	1.32276	5.84773	0.403553	0.44283
YFR022W	ROG3	0.899064	0.661944	1.35822	12.4475	14.2079	1.14142	3.82862	0.190833	0.441714
YGR144W	THI4	0.654274	0.482031	1.35733	8.1335	8.13181	0.999792	3.02358	-0.000299734	0.440769
YNL124W	NAF1	1.04808	0.772235	1.3572	11.6389	15.6776	1.347	3.97063	0.429755	0.440633
YPR065W	ROX1	0.485608	0.357882	1.35689	38.6672	47.2997	1.22325	5.56376	0.290721	0.440307
YBL101C	ECM21	0.892641	0.65789	1.35682	14.4373	42.2384	2.92564	5.40048	1.54875	0.440234
YDR341C	YDR341C	0.958974	0.706832	1.35672	22.0127	37.3164	1.69522	5.22174	0.761476	0.440124
YGR043C	YGR043C	0.706786	0.521032	1.35651	9.5506	23.0598	2.41449	4.52731	1.27172	0.439903
YJL165C	HAL5	0.777601	0.573865	1.35503	21.1236	23.8912	1.13102	4.57841	0.177621	0.43832
YBL045C	COR1	0.449222	0.331557	1.35489	26.3868	23.8624	0.904329	4.57667	-0.14508	0.438171
YHR019C	DED81	0.962515	0.710553	1.3546	25.7756	53.9248	2.09209	5.75288	1.06494	0.437866
YHR020W	YHR020W	0.962515	0.710553	1.3546	29.2716	44.0824	1.50598	5.46213	0.5907	0.437866
YOL113W	SKM1	1.09715	0.810433	1.35378	13.2673	20.0867	1.51401	4.32817	0.598373	0.436994
YOL114C	YOL114C	1.09715	0.810433	1.35378	21.2099	20.8614	0.983569	4.38276	-0.0239022	0.436994
YEL071W	DLD3	0.756484	0.559725	1.35153	43.757	118.488	2.70786	6.88859	1.43715	0.434592
YDL127W	PCL2	0.346484	0.256546	1.35057	36.4486	33.1658	0.909933	5.05162	-0.136167	0.433571
YDR527W	RBA50	0.745352	0.552037	1.35018	32.0647	25.1335	0.783835	4.65154	-0.351378	0.433157
YKL150W	MCR1	0.971644	0.719912	1.34967	33.5745	53.9394	1.60656	5.75327	0.683971	0.432608
YNL311C	SKP2	1.09672	0.81329	1.3485	12.2112	28.2781	2.31575	4.82161	1.21148	0.431357
YJL107C	YJL107C	0.55422	0.411136	1.34802	14.2596	21.573	1.51288	4.43116	0.597293	0.430841
YBL043W	ECM13	0.450769	0.335028	1.34547	5.0366	35.938	7.13538	5.16744	2.83499	0.428106
YDL199C	YDL199C	0.927897	0.689835	1.3451	6.81329	17.0636	2.50446	4.09285	1.3245	0.427712
YBR147W	YBR147W	0.923783	0.68686	1.34494	5.55369	107.092	19.2831	6.74271	4.26927	0.427538
YLR333C	RPS25B	0.605998	0.450605	1.34486	72.9153	64.5681	0.885521	6.01275	-0.175401	0.427451
YOR219C	STE13	0.923997	0.687124	1.34473	14.8071	23.7193	1.60189	4.56799	0.679771	0.427317
YOR220W	WSP1	0.923997	0.687124	1.34473	16.1345	40.3616	2.50158	5.33491	1.32284	0.427317
YDL170W	UGA3	0.656297	0.488625	1.34315	10.9138	63.69	5.83574	5.99299	2.54492	0.42562
YDL171C	GLT1	0.656297	0.488625	1.34315	19.8646	29.9682	1.50863	4.90536	0.593235	0.42562
YKL063C	YKL063C	0.688314	0.513118	1.34143	30.9841	30.9151	0.997772	4.95024	-0.00321796	0.423775
YEL054C	RPL12A	0.592778	0.44222	1.34046	115.776	92.9174	0.802561	6.53788	-0.317317	0.422727
YBR255C-A	YBR255C-A	0.988454	0.737743	1.33984	25.9527	34.9839	1.34798	5.12862	0.430804	0.422057
YJR130C	STR2	0.846905	0.632503	1.33897	12.3902	57.2115	4.61749	5.83823	2.20711	0.421128
YDR059C	UBC5	1.09247	0.816455	1.33806	14.3334	20.566	1.43483	4.36219	0.52088	0.420147
YDR002W	YRB1	0.814565	0.609497	1.33645	33.3391	21.0868	0.632494	4.39827	-0.660877	0.418411
YDR001C	NTH1	0.814565	0.609497	1.33645	26.6214	44.2843	1.66349	5.46872	0.73421	0.418411
YJR058C	APS2	1.37671	1.03127	1.33497	32.2805	29.297	0.907575	4.87268	-0.139911	0.41681
YKL051W	SFK1	0.576575	0.432647	1.33267	34.9009	37.8797	1.08535	5.24335	0.118159	0.41432
YNL268W	LYP1	0.686046	0.514823	1.33258	34.7372	36.4369	1.04893	5.18733	0.0689193	0.414227
YMR107W	SPG4	0.719932	0.541223	1.33019	4.1634	6.30428	1.51421	2.65633	0.598569	0.411637
YCL027W	FUS1	0.886596	0.666662	1.3299	15.501	51.419	3.31714	5.68423	1.72994	0.411322
YOL082W	ATG19	0.656236	0.493701	1.32922	16.8027	24.3486	1.44909	4.60577	0.535149	0.410576
YCL010C	SGF29	1.12313	0.845176	1.32887	36.0452	28.1074	0.779782	4.81288	-0.358858	0.410203
YIR017C	MET28	0.804017	0.605846	1.3271	15.7361	85.3738	5.42533	6.41572	2.43971	0.408275
YIR018W	YAP5	0.804017	0.605846	1.3271	14.5338	25.1436	1.73001	4.65212	0.790782	0.408275
YBL103C	RTG3	0.982743	0.741046	1.32616	14.5381	33.0243	2.27157	5.04546	1.18369	0.40725
YBL102W	SFT2	0.982743	0.741046	1.32616	16.1084	45.217	2.80705	5.49879	1.48906	0.40725
YPR122W	AXL1	0.766532	0.578172	1.32579	19.8053	24.6994	1.24711	4.6264	0.318591	0.406848
YGL194C-A	YGL194C-A	0.650902	0.491422	1.32453	22.9852	23.1707	1.00807	4.53423	0.0115985	0.405479
YDR111C	ALT2	0.78296	0.591127	1.32452	14.6951	8.46506	0.576047	3.08152	-0.795742	0.40547
YJL016W	YJL016W	0.686523	0.518672	1.32362	24.2798	29.611	1.21957	4.88806	0.286375	0.404484
YBR126C	TPS1	0.981885	0.742287	1.32278	44.9599	72.9123	1.62172	6.18809	0.697522	0.403577
YPR115W	YPR115W	0.865919	0.654793	1.32243	17.903	23.92	1.33609	4.58015	0.418016	0.403193
YMR105W-A	YMR105W-A	0.936382	0.70947	1.31983	18.864	26.6394	1.41218	4.73549	0.497926	0.400356
YMR105C	PGM2	0.936382	0.70947	1.31983	31.369	50.2423	1.60165	5.65083	0.679563	0.400356
YGL116W	CDC20	0.735881	0.558757	1.317	15.9706	23.3297	1.46079	4.5441	0.546746	0.39725
YPL087W	YDC1	0.943107	0.717405	1.31461	11.8101	19.9684	1.69078	4.31965	0.757693	0.394633
YGR124W	ASN2	0.847528	0.64588	1.31221	24.4294	40.3319	1.65096	5.33385	0.723303	0.391995
YDL125C	HNT1	1.01736	0.775457	1.31196	66.3234	55.5888	0.838148	5.79672	-0.254723	0.391718
YGR250C	YGR250C	0.883466	0.673644	1.31147	11.4005	14.1118	1.23782	3.81883	0.307806	0.391188
YER136W	GDI1	0.862527	0.658776	1.30929	26.265	23.2458	0.885048	4.5389	-0.176173	0.388782
YER020W	GPA2	1.03242	0.788815	1.30882	16.1745	26.175	1.61829	4.71012	0.694472	0.388271
YDR035W	ARO3	0.758662	0.579939	1.30818	19.9196	138.417	6.94879	7.11288	2.79676	0.387557
YOR007C	SGT2	0.820144	0.628018	1.30592	33.2779	19.1768	0.576263	4.26129	-0.7952	0.385072
YJL052W	TDH1	0.882089	0.675791	1.30527	29.0983	69.0528	2.37309	6.10963	1.24677	0.384347
YIL165C	YIL165C	1.05006	0.804748	1.30484	11.0984	39.3011	3.54116	5.2965	1.82422	0.383869
YLR058C	SHM2	0.751292	0.576035	1.30425	54.3583	131.58	2.42061	7.0398	1.27537	0.383218
YJL106W	IME2	1.05433	0.808991	1.30327	6.75484	8.6043	1.2738	3.10506	0.349136	0.382132
YDR041W	RSM10	1.05258	0.808005	1.30269	24.3382	25.0026	1.0273	4.644	0.0388511	0.381498
YKL164C	PIR1	0.644397	0.495358	1.30087	128.122	86.2087	0.672864	6.42976	-0.571613	0.379479
YPL048W	CAM1	0.82848	0.636943	1.30071	22.398	26.2606	1.17246	4.71483	0.229534	0.379302
YGL096W	TOS8	0.536353	0.412727	1.29954	21.3873	29.9508	1.4004	4.90452	0.48584	0.377997
YMR196W	YMR196W	0.813854	0.626534	1.29898	18.2521	28.6239	1.56825	4.83915	0.649156	0.377379
YCL064C	CHA1	0.745338	0.57415	1.29816	27.7049	120.4	4.34579	6.91169	2.11962	0.376467
YGL125W	MET13	0.492643	0.37955	1.29797	25.7856	98.1398	3.806	6.61677	1.92828	0.376253
YBR111W-A	SUS1	1.10608	0.852784	1.29702	22.4817	26.9627	1.19932	4.7529	0.262213	0.375205
YBR111C	YSA1	1.10608	0.852784	1.29702	18.7164	22.667	1.21108	4.50252	0.276291	0.375205
YNL194C	YNL194C	0.847161	0.653188	1.29696	8.65164	12.7798	1.47715	3.67579	0.562818	0.375138
YGL223C	COG1	0.757044	0.583968	1.29638	15.4777	68.5826	4.43107	6.09977	2.14766	0.374488
YLR290C	YLR290C	0.699078	0.539275	1.29633	10.5961	21.4321	2.02264	4.4217	1.01624	0.374433
YCL063W	VAC17	0.747476	0.576612	1.29633	21.8286	17.5454	0.803782	4.13302	-0.315123	0.374428
YLR266C	PDR8	1.31137	1.01182	1.29605	13.7749	16.8477	1.22308	4.07448	0.290515	0.374124
YNL042W	BOP3	1.00778	0.777637	1.29595	17.6712	23.4044	1.32444	4.54871	0.405381	0.374007
YOL121C	RPS19A	0.432734	0.333966	1.29574	91.5396	87.3021	0.953708	6.44794	-0.0683797	0.373781
YPR157W	YPR157W	0.406395	0.313713	1.29543	7.37568	9.12425	1.23707	3.18971	0.30693	0.373434
YML117W	NAB6	0.966627	0.746364	1.29511	24.319	30.8299	1.26773	4.94626	0.342249	0.373079
YDL138W	RGT2	0.642397	0.496715	1.29329	18.7812	20.6899	1.10163	4.37086	0.139641	0.371048
YCR004C	YCP4	0.676296	0.523262	1.29246	19.0432	26.8795	1.4115	4.74843	0.497232	0.370123
YDR037W	KRS1	0.767521	0.59394	1.29225	38.3922	74.3582	1.9368	6.21642	0.953678	0.369888
YER158C	YER158C	0.469077	0.363055	1.29203	11.2424	11.1458	0.991412	3.47843	-0.0124433	0.369638
YNL278W	CAF120	0.732886	0.567359	1.29175	13.0786	15.0691	1.1522	3.91352	0.204391	0.369327
YLR152C	YLR152C	1.00789	0.780531	1.29129	11.5463	50.1071	4.33968	5.64694	2.11759	0.368809
YGR065C	VHT1	0.893491	0.692037	1.2911	16.3176	89.7094	5.49771	6.48719	2.45883	0.368603
YMR173W	DDR48	0.629455	0.487569	1.29101	26.0089	86.6811	3.33275	6.43765	1.73671	0.368498
YIR034C	LYS1	1.02236	0.792365	1.29026	13.156	110.897	8.42939	6.79308	3.07543	0.367664
YLR332W	MID2	0.498876	0.386724	1.29001	20.8989	30.2616	1.448	4.91942	0.534066	0.367379
YBR083W	TEC1	0.418155	0.324164	1.28995	56.9438	53.0226	0.931139	5.72854	-0.102931	0.367311
YIL111W	COX5B	0.686416	0.532142	1.28991	36.9843	64.3168	1.73903	6.00712	0.798282	0.367271
YBL017C	PEP1	0.79784	0.618696	1.28955	22.4336	22.2499	0.991812	4.47573	-0.0118608	0.366869
YLR350W	ORM2	0.888519	0.689154	1.28929	36.6911	41.8431	1.14041	5.38692	0.189557	0.366575
YGR204W	ADE3	0.665153	0.518265	1.28342	25.5952	48.5089	1.89524	5.60018	0.922378	0.359997
YJR115W	YJR115W	0.430316	0.335768	1.28159	18.815	14.2195	0.755754	3.8298	-0.404012	0.357933
YJR129C	YJR129C	1.17488	0.91741	1.28065	89.7592	72.3466	0.806008	6.17685	-0.311134	0.356875
YPL049C	DIG1	0.846188	0.661363	1.27946	25.9984	30.6676	1.1796	4.93864	0.238293	0.355535
YNL055C	POR1	0.70698	0.552569	1.27944	50.3958	85.843	1.70338	6.42363	0.768397	0.355515
YOL122C	SMF1	0.859428	0.672235	1.27846	19.8083	23.3984	1.18124	4.54834	0.240303	0.354412
YBR054W	YRO2	0.47844	0.374356	1.27804	42.1123	31.1544	0.739795	4.96137	-0.434802	0.353929
YER078C	YER078C	0.796894	0.624268	1.27653	11.3044	16.5262	1.46193	4.04668	0.547874	0.352222
YER079W	YER079W	0.796894	0.624268	1.27653	16.1462	29.4968	1.82685	4.88249	0.869359	0.352222
YPR033C	HTS1	1.01156	0.792875	1.27581	24.3312	30.6748	1.26072	4.93898	0.334243	0.351412
YLR414C	YLR414C	0.927204	0.726963	1.27545	49.2693	79.3587	1.61071	6.31032	0.687701	0.351005
YIL016W	SNL1	1.20263	0.94294	1.2754	92.5217	122.756	1.32678	6.93964	0.407925	0.350953
YDL181W	INH1	0.95346	0.747704	1.27518	32.3088	39.1223	1.21089	5.28992	0.276064	0.350705
YML116W	ATR1	0.841563	0.660334	1.27445	14.7914	30.214	2.04268	4.91715	1.03046	0.349874
YMR149W	SWP1	0.921347	0.722968	1.2744	25.6493	26.3058	1.02559	4.71731	0.0364574	0.349813
YDR481C	PHO8	1.29707	1.01828	1.27378	16.6905	40.7921	2.44403	5.35022	1.28926	0.349121
YNL154C	YCK2	0.731749	0.574489	1.27374	28.3275	33.8541	1.1951	5.08126	0.25713	0.349069
YLR407W	YLR407W	0.70269	0.551687	1.27371	22.1239	22.6904	1.0256	4.50401	0.0364739	0.349037
YKR052C	MRS4	0.967027	0.759324	1.27354	22.6558	24.3484	1.07471	4.60576	0.103945	0.348841
YHR071W	PCL5	0.652954	0.512775	1.27337	30.8788	278.757	9.02744	8.12286	3.17432	0.348656
YBR121C	GRS1	0.916108	0.719679	1.27294	28.9143	21.1231	0.730544	4.40075	-0.452957	0.348165
YBR241C	YBR241C	0.690505	0.542551	1.2727	7.12832	9.86986	1.3846	3.30303	0.469468	0.347893
YBR242W	YBR242W	0.690505	0.542551	1.2727	19.5391	11.5206	0.589616	3.52614	-0.762151	0.347893
YPL091W	GLR1	0.855687	0.672951	1.27154	22.6192	25.7136	1.1368	4.68446	0.184982	0.346582
YMR012W	CLU1	0.509557	0.400784	1.2714	27.2124	16.9915	0.624402	4.08674	-0.679453	0.346417
YLR028C	ADE16	0.731079	0.575314	1.27075	35.6231	34.1482	0.958595	5.09374	-0.0610066	0.345676
YDR032C	PST2	0.924273	0.72761	1.27029	24.2297	33.6643	1.38938	5.07315	0.474445	0.345155
YGR094W	VAS1	0.67435	0.53094	1.27011	30.7529	32.2515	1.04873	5.0113	0.0686447	0.34495
YJL172W	CPS1	1.10578	0.870663	1.27005	17.0148	31.4114	1.84613	4.97322	0.884502	0.344884
YMR041C	YMR041C	0.658228	0.518646	1.26913	10.4658	13.2741	1.26834	3.73055	0.342939	0.343839
YMR042W	ARG80	0.658228	0.518646	1.26913	25.2058	23.4847	0.931717	4.55365	-0.102036	0.343839
YLR194C	YLR194C	0.866115	0.68272	1.26862	36.9239	56.919	1.54152	5.83084	0.624355	0.343265
YBL076C	ILS1	0.789887	0.622966	1.26795	38.9074	53.7825	1.38232	5.74907	0.467091	0.342494
YGL058W	RAD6	0.95197	0.750835	1.26788	23.3638	38.4783	1.64692	5.26597	0.719772	0.342421
YMR052W	FAR3	0.737933	0.582113	1.26768	15.1491	16.8987	1.11549	4.07884	0.157679	0.342191
YOL103W	ITR2	0.744176	0.587094	1.26756	18.1341	12.5731	0.693343	3.65227	-0.528358	0.342052
YKR058W	GLG1	0.756622	0.59712	1.26712	19.3896	27.3237	1.4092	4.77208	0.494874	0.341552
YJL171C	YJL171C	1.00127	0.791179	1.26555	19.6874	34.9605	1.77578	5.12765	0.828457	0.339761
YER089C	PTC2	0.771162	0.609755	1.26471	38.1405	37.1083	0.972938	5.21367	-0.0395808	0.338803
YER090W	TRP2	0.771162	0.609755	1.26471	17.2053	63.0334	3.66361	5.97805	1.87327	0.338803
YDL019C	OSH2	1.01502	0.802678	1.26454	14.3737	17.0026	1.1829	4.08768	0.242328	0.338609
YKL061W	YKL061W	0.77096	0.609767	1.26435	36.6234	33.5735	0.916724	5.06925	-0.12544	0.338398
YML129C	COX14	0.991435	0.784634	1.26356	30.5031	30.3404	0.994666	4.92317	-0.00771574	0.337499
YFL021W	GAT1	0.632893	0.500924	1.26345	24.337	34.1152	1.40178	5.09234	0.487263	0.337369
YKL033W-A	YKL033W-A	0.858287	0.679925	1.26233	17.3971	40.4532	2.32528	5.33818	1.2174	0.336085
YDR046C	BAP3	0.455749	0.361183	1.26182	40.3742	73.3744	1.81736	6.19721	0.861845	0.335511
YNL298W	CLA4	0.821076	0.651032	1.26119	16.8044	20.5061	1.22028	4.35798	0.287215	0.334787
YHL021C	FMP12	1.28844	1.0217	1.26107	21.6711	110.282	5.0889	6.78505	2.34735	0.334651
YBR125C	PTC4	0.715162	0.567577	1.26003	13.5413	10.687	0.789211	3.41778	-0.341517	0.333453
YDR019C	GCV1	0.98876	0.785275	1.25913	22.7221	59.3032	2.60994	5.89004	1.38402	0.332423
YGL121C	GPG1	0.804962	0.639476	1.25878	30.1387	32.3834	1.07448	5.01718	0.103635	0.33203
YML120C	NDI1	1.0953	0.870739	1.2579	30.7649	34.3075	1.11515	5.10045	0.157239	0.331015
YDR234W	LYS4	0.282456	0.224652	1.25731	15.2738	20.2946	1.32872	4.34302	0.410036	0.330337
YFL017W-A	SMX2	1.19132	0.947952	1.25673	38.9824	29.7381	0.76286	4.89424	-0.39051	0.32967
YDR020C	YDR020C	0.872916	0.694642	1.25664	14.715	16.9364	1.15096	4.08206	0.20284	0.329573
YDR021W	FAL1	0.872916	0.694642	1.25664	10.1034	8.57279	0.848506	3.09977	-0.237003	0.329573
YOR052C	YOR052C	1.04323	0.830459	1.25621	61.0643	60.1201	0.984537	5.90978	-0.0224822	0.329079
YPL156C	PRM4	0.669242	0.533439	1.25458	24.0468	39.1619	1.62857	5.29138	0.703603	0.327204
YBL089W	AVT5	1.22765	0.978609	1.25448	17.3057	19.1574	1.107	4.25983	0.146649	0.32709
YNL018C	YNL018C	0.617122	0.492048	1.25419	8.763	12.5958	1.43739	3.65487	0.523447	0.326757
YLR247C	YLR247C	1.28927	1.02836	1.25372	13.3273	12.5228	0.93964	3.64649	-0.0898194	0.326217
YLR248W	RCK2	1.28927	1.02836	1.25372	18.045	18.6628	1.03424	4.22209	0.0485668	0.326217
YDR171W	HSP42	0.883556	0.70509	1.25311	27.964	39.8896	1.42646	5.31794	0.512443	0.325514
YCL009C	ILV6	1.44759	1.15546	1.25283	24.4362	85.8207	3.51203	6.42325	1.8123	0.325188
YER045C	ACA1	0.666925	0.532752	1.25185	6.75977	9.71676	1.43744	3.28048	0.523502	0.32406
YGR125W	YGR125W	0.665801	0.531889	1.25177	14.4361	17.7803	1.23166	4.15221	0.300603	0.323966
YKL116C	PRR1	0.770636	0.615857	1.25132	15.4869	11.8988	0.768313	3.57274	-0.380233	0.323453
YLR448W	RPL6B	0.526333	0.420656	1.25122	82.6376	67.4032	0.815647	6.07474	-0.293983	0.323335
YNL144C	YNL144C	0.51429	0.411039	1.25119	17.0119	25.3591	1.49067	4.66443	0.575961	0.323305
YLR126C	YLR126C	0.831427	0.664594	1.25103	12.3817	13.5424	1.09375	3.75941	0.129279	0.323118
YMR318C	ADH6	0.934702	0.747413	1.25058	23.1466	22.1973	0.958986	4.47231	-0.0604181	0.3226
YPL079W	RPL21B	0.531637	0.42512	1.25056	80.6133	67.2116	0.833754	6.07064	-0.262307	0.32257
YPR199C	ARR1	0.659959	0.528004	1.24991	17.8751	12.5575	0.702518	3.65048	-0.509394	0.32183
YDL222C	FMP45	0.904557	0.723981	1.24942	21.3935	63.7705	2.98083	5.99482	1.57572	0.321259
YMR316W	DIA1	1.11161	0.890549	1.24823	11.9242	42.4802	3.5625	5.40872	1.83289	0.319886
YBR208C	DUR1,2	0.993261	0.795944	1.2479	9.23447	9.20368	0.996666	3.20221	-0.00481748	0.319505
YOL048C	YOL048C	0.649437	0.520805	1.24699	17.6492	31.3303	1.77517	4.96949	0.827958	0.318446
YKL062W	MSN4	0.825253	0.66181	1.24696	21.6812	21.4682	0.990175	4.42413	-0.0142441	0.31842
YMR267W	PPA2	0.910386	0.730642	1.24601	17.6223	14.9584	0.848835	3.90289	-0.236444	0.317313
YIL011W	TIR3	0.844507	0.677794	1.24596	7.42342	6.28397	0.846506	2.65168	-0.240407	0.317261
YDR226W	ADK1	0.776389	0.623162	1.24589	43.7113	40.4019	0.924289	5.33635	-0.113584	0.317172
YDR026C	YDR026C	1.0617	0.8523	1.24569	16.2091	16.9364	1.04487	4.08206	0.0633283	0.316941
YER155C	BEM2	0.965018	0.774777	1.24554	24.9216	21.4717	0.861571	4.42436	-0.214958	0.316774
YEL063C	CAN1	0.585706	0.470317	1.24534	24.0521	52.7315	2.19239	5.72059	1.1325	0.316541
YBR162C	TOS1	0.329279	0.264518	1.24483	52.7403	68.9626	1.30759	6.10774	0.386907	0.315947
YBR014C	YBR014C	0.87409	0.702294	1.24462	18.614	14.2956	0.768004	3.8375	-0.380814	0.315707
YCL035C	GRX1	1.0662	0.857478	1.24342	30.2692	38.8389	1.28312	5.27943	0.359651	0.31431
YER019C-A	SBH2	0.917252	0.737855	1.24313	73.3525	49.7312	0.677976	5.63608	-0.560694	0.313981
YHR088W	RPF1	0.965936	0.77705	1.24308	18.654	11.4126	0.611804	3.51256	-0.708859	0.313921
YDL069C	CBS1	1.39819	1.12485	1.243	25.0475	25.8339	1.0314	4.69119	0.0445973	0.313826
YLR342W	FKS1	0.444307	0.357545	1.24266	64.4302	45.2064	0.701634	5.49846	-0.511209	0.313435
YLR412W	YLR412W	0.982834	0.790945	1.24261	20.3187	13.9017	0.684184	3.79719	-0.547543	0.31337
YDL067C	COX9	1.3972	1.12449	1.24252	30.1751	53.6172	1.77687	5.74462	0.829337	0.313264
YOR185C	GSP2	0.884326	0.711869	1.24226	11.6066	19.3221	1.66475	4.27218	0.735308	0.312966
YER091C	MET6	0.521645	0.419953	1.24215	71.6415	195.341	2.72665	7.60985	1.44713	0.312841
YDL124W	YDL124W	0.589033	0.474241	1.24205	55.3452	55.0299	0.994302	5.78214	-0.00824413	0.312729
YLR138W	NHA1	1.07079	0.862214	1.24191	12.262	13.0096	1.06096	3.7015	0.085375	0.312563
YER092W	IES5	0.523352	0.421409	1.24191	32.6212	39.0218	1.19621	5.28621	0.25847	0.312559
YJR051W	OSM1	0.803657	0.647302	1.24155	15.1692	14.0949	0.929179	3.81711	-0.105971	0.312141
YJL154C	VPS35	0.681432	0.549	1.24122	18.8816	17.8181	0.943676	4.15527	-0.0836372	0.311762
YBR043C	QDR3	0.83285	0.67146	1.24036	17.9953	22.2376	1.23574	4.47493	0.305378	0.310754
YNL004W	HRB1	1.08696	0.876693	1.23984	29.9183	54.1518	1.80999	5.75894	0.855982	0.310153
YOR385W	YOR385W	1.14834	0.926267	1.23975	14.5384	26.5002	1.82278	4.72793	0.866139	0.310049
YPL054W	LEE1	0.728348	0.587741	1.23923	6.73484	9.17969	1.36302	3.19844	0.446802	0.309447
YPL055C	LGE1	0.728348	0.587741	1.23923	30.0929	26.3673	0.876197	4.72068	-0.190672	0.309447
YER096W	SHC1	0.826139	0.666732	1.23909	6.17103	6.88053	1.11497	2.78252	0.157009	0.309279
YOR227W	YOR227W	0.985247	0.795231	1.23894	14.5471	20.1316	1.3839	4.33139	0.468736	0.309112
YER024W	YAT2	0.861811	0.695756	1.23867	16.8212	50.9196	3.0271	5.67015	1.59794	0.30879
YIL029C	YIL029C	0.884056	0.714693	1.23697	10.4196	13.5589	1.30129	3.76117	0.379942	0.306813
YER016W	BIM1	1.25937	1.01842	1.23659	14.6962	13.5765	0.923809	3.76304	-0.114334	0.306362
YLR053C	YLR053C	1.21068	0.979576	1.23592	19.3919	20.2829	1.04595	4.34219	0.0648136	0.305583
YDR512C	EMI1	1.00471	0.813235	1.23544	27.4156	36.2921	1.32377	5.18158	0.404656	0.305029
YDR513W	GRX2	1.00471	0.813235	1.23544	35.1542	52.6566	1.49788	5.71854	0.58292	0.305029
YGR130C	YGR130C	1.08162	0.876126	1.23455	31.8493	43.7718	1.37434	5.45193	0.45874	0.303989
YDR047W	HEM12	1.01966	0.825957	1.23452	28.6817	15.4704	0.539383	3.95144	-0.890618	0.303949
YKL151C	YKL151C	1.08565	0.879776	1.23401	71.8537	77.5745	1.07962	6.27751	0.11052	0.303353
YCR012W	PGK1	0.360426	0.292078	1.23401	290.911	194.897	0.669954	7.60657	-0.577866	0.303351
YGL224C	SDT1	0.761249	0.616908	1.23398	30.6366	74.4346	2.4296	6.2179	1.28072	0.303314
YKL034W	TUL1	0.811121	0.657388	1.23385	10.9281	15.017	1.37416	3.90852	0.458547	0.303172
YDL066W	IDP1	1.50497	1.22012	1.23347	20.1856	65.9288	3.26612	6.04284	1.70758	0.302719
YDR418W	RPL12B	0.597394	0.484397	1.23327	113.803	101.096	0.888342	6.65958	-0.170813	0.302494
YDR036C	EHD3	1.03661	0.840951	1.23266	13.9858	27.4824	1.96501	4.78043	0.97454	0.301781
YNL042W-B	YNL042W-B	1.40959	1.1443	1.23184	42.2283	79.3021	1.87794	6.30929	0.90915	0.300809
YNL070W	TOM7	0.616679	0.500681	1.23168	52.5465	51.3403	0.977046	5.68202	-0.0335017	0.300627
YBR256C	RIB5	0.898079	0.729201	1.23159	21.2029	137.557	6.48765	7.10389	2.6977	0.300526
YOR363C	PIP2	0.930222	0.755367	1.23148	10.9831	17.2454	1.57017	4.10814	0.650922	0.300398
YOR065W	CYT1	0.713934	0.579741	1.23147	26.7178	23.3995	0.875802	4.54841	-0.191323	0.300383
YOR064C	YNG1	0.713934	0.579741	1.23147	40.3692	30.4724	0.754843	4.92943	-0.405752	0.300383
YDL175C	AIR2	0.901348	0.73222	1.23098	19.457	20.7545	1.06668	4.37535	0.0931336	0.299807
YGR089W	NNF2	0.640779	0.520796	1.23038	17.6505	15.0917	0.855026	3.91568	-0.22596	0.299106
YCL034W	LSB5	1.25656	1.02132	1.23033	16.6434	16.907	1.01584	4.07955	0.0226699	0.299048
YMR108W	ILV2	0.425496	0.345967	1.22987	32.1334	57.815	1.79922	5.85337	0.847371	0.29851
YDR349C	YPS7	1.04543	0.850933	1.22857	18.3517	13.8841	0.756554	3.79536	-0.402486	0.296975
YJL164C	TPK1	0.994175	0.809316	1.22841	21.9084	34.739	1.58565	5.11849	0.665073	0.296797
YPL072W	UBP16	0.861157	0.701157	1.22819	12.861	10.1773	0.791334	3.34729	-0.337641	0.296537
YIL072W	HOP1	0.666473	0.542722	1.22802	8.08545	10.7755	1.3327	3.42968	0.414354	0.296331
YIL073C	SPO22	0.674423	0.549222	1.22796	8.60583	8.41962	0.978363	3.07376	-0.0315577	0.296265
YHR029C	YHI9	0.61994	0.505038	1.22751	11.7693	44.678	3.79615	5.48149	1.92454	0.295736
YCR067C	SED4	0.785197	0.639758	1.22733	16.9539	13.645	0.80483	3.7703	-0.313245	0.295529
YGR199W	PMT6	0.807574	0.658154	1.22703	16.9226	20.4218	1.20677	4.35204	0.271154	0.29517
YDL006W	PTC1	0.828465	0.675187	1.22702	19.1607	18.9954	0.991374	4.24758	-0.012499	0.295154
YPL262W	FUM1	1.12012	0.913145	1.22666	12.0173	17.4773	1.45435	4.12741	0.540371	0.294739
YGL185C	YGL185C	1.0297	0.83988	1.226	14.116	44.5817	3.15824	5.47838	1.65912	0.293964
YPL026C	SKS1	0.246907	0.201432	1.22576	30.8985	24.5957	0.796015	4.62033	-0.329132	0.293675
YFL018C	LPD1	0.740576	0.604478	1.22515	22.209	32.827	1.4781	5.03681	0.563741	0.292958
YDL077C	VAM6	1.08785	0.888202	1.22478	9.09809	11.2747	1.23924	3.49502	0.309452	0.292519
YKL020C	SPT23	1.14	0.931046	1.22443	21.8232	21.5075	0.985535	4.42677	-0.0210215	0.292112
YPL074W	YTA6	0.764791	0.62476	1.22413	12.3032	10.913	0.887001	3.44797	-0.172993	0.291763
YMR176W	ECM5	1.07152	0.875684	1.22364	10.2894	10.3594	1.0068	3.37286	0.00977951	0.291175
YNR059W	MNT4	1.2293	1.00505	1.22312	14.5713	13.7849	0.946034	3.78502	-0.0800362	0.29056
YDL121C	YDL121C	1.07071	0.875537	1.22292	17.264	13.58	0.786608	3.76341	-0.346283	0.290328
YDL120W	YFH1	1.07071	0.875537	1.22292	20.8977	28.1543	1.34724	4.81529	0.43001	0.290328
YMR188C	MRPS17	0.951555	0.778295	1.22261	21.2201	22.9262	1.0804	4.51892	0.111564	0.28997
YMR189W	GCV2	0.951555	0.778295	1.22261	20.1481	63.2506	3.13928	5.98301	1.65043	0.28997
YMR175W-A	YMR175W-A	1.06371	0.870178	1.2224	7.02736	7.73411	1.10057	2.95123	0.138251	0.289718
YOR202W	HIS3	0.944687	0.772969	1.22215	13.9892	61.5543	4.40013	5.94379	2.13755	0.289426
YOR201C	MRM1	0.944687	0.772969	1.22215	21.9847	34.2485	1.55783	5.09797	0.63954	0.289426
YKL103C	LAP4	0.669141	0.547613	1.22192	16.2114	39.8429	2.45771	5.31625	1.29732	0.289152
YGL123W	RPS2	0.612456	0.501702	1.22076	124.423	110.477	0.887913	6.7876	-0.171509	0.287774
YGL150C	INO80	1.22476	1.00333	1.22069	14.1119	15.6655	1.11009	3.96952	0.150678	0.287697
YPR109W	YPR109W	0.689783	0.565158	1.22051	15.5782	20.5107	1.31663	4.35831	0.396852	0.287489
YMR152W	YIM1	0.912694	0.747911	1.22032	18.3606	22.2286	1.21067	4.47434	0.275801	0.287264
YLR406C	RPL31B	0.476196	0.390366	1.21987	83.8732	64.5059	0.769089	6.01136	-0.378777	0.286728
YLL002W	RTT109	1.2315	1.00956	1.21983	14.208	8.5557	0.602174	3.09689	-0.731748	0.28668
YGR184C	UBR1	0.877854	0.719919	1.21938	14.69	13.1115	0.892546	3.71277	-0.164002	0.286147
YOL112W	MSB4	0.772051	0.633158	1.21936	18.777	22.7916	1.21381	4.51043	0.279539	0.28613
YDR022C	CIS1	0.836709	0.686435	1.21892	15.2148	12.1366	0.797685	3.60129	-0.326109	0.285604
YBL085W	BOI1	0.896613	0.735759	1.21862	16.9946	14.1733	0.833992	3.82511	-0.261895	0.285251
YOL011W	PLB3	0.932107	0.765064	1.21834	50.2778	56.744	1.12861	5.8264	0.174546	0.284916
YDR084C	TVP23	1.07892	0.885689	1.21817	15.2408	15.4606	1.01442	3.95052	0.0206568	0.284711
YDR055W	PST1	0.706026	0.579775	1.21776	50.6413	52.6581	1.03983	5.71858	0.0563411	0.284228
YDR034C-A	YDR034C-A	0.530229	0.435429	1.21772	15.6634	13.8918	0.886894	3.79616	-0.173167	0.284178
YML067C	ERV41	1.03533	0.850456	1.21739	21.6436	20.4348	0.944151	4.35296	-0.0829108	0.283787
YDR477W	SNF1	1.17092	0.961876	1.21733	21.3808	22.592	1.05665	4.49774	0.0795018	0.283715
YDR261C	EXG2	0.840221	0.690222	1.21732	18.1437	18.2356	1.00506	4.18868	0.0072849	0.283708
YJL060W	BNA3	0.969019	0.796132	1.21716	13.7395	32.7188	2.38138	5.03205	1.2518	0.283517
YER130C	YER130C	0.890157	0.731671	1.21661	28.3093	29.6188	1.04626	4.88844	0.0652405	0.282864
YDR306C	YDR306C	0.952033	0.782612	1.21648	12.8891	15.3129	1.18805	3.93668	0.248601	0.282714
YNL193W	YNL193W	0.952433	0.78302	1.21636	15.9967	24.42	1.52656	4.60999	0.610288	0.282567
YLR268W	SEC22	0.927549	0.762878	1.21585	14.9156	15.4946	1.03882	3.95369	0.0549435	0.281971
YDL140C	RPO21	0.821374	0.675627	1.21572	36.4873	26.0972	0.71524	4.70582	-0.4835	0.281812
YGR060W	ERG25	0.259499	0.213454	1.21571	40.3257	30.2547	0.750257	4.91909	-0.414543	0.281802
YJL012C	VTC4	1.26551	1.04128	1.21534	13.0782	12.6193	0.964911	3.65756	-0.0515325	0.281363
YGR191W	HIP1	1.01737	0.837116	1.21532	21.8031	23.5254	1.07899	4.55615	0.109687	0.28134
YHR137W	ARO9	0.690371	0.56824	1.21493	7.97557	127.366	15.9696	6.99284	3.99725	0.280873
YOR349W	CIN1	0.51568	0.424528	1.21472	17.1342	14.2022	0.828878	3.82804	-0.270768	0.280619
YFR008W	FAR7	1.34647	1.10849	1.21469	10.0557	11.3757	1.13126	3.50788	0.177936	0.280593
YGL124C	MON1	0.614677	0.506143	1.21443	11.9616	24.6239	2.05859	4.62199	1.04165	0.280283
YDR126W	SWF1	1.11333	0.9169	1.21423	25.0686	108.569	4.33088	6.76247	2.11466	0.280043
YMR232W	FUS2	0.764783	0.63	1.21394	7.93223	16.6419	2.09801	4.05675	1.06902	0.279699
YPL257W	YPL257W	0.794435	0.654548	1.21372	17.9123	28.2583	1.57759	4.8206	0.657719	0.279431
YHR142W	CHS7	0.723415	0.596168	1.21344	35.9911	43.4617	1.20757	5.44167	0.272103	0.279105
YGL257C	MNT2	1.12049	0.923562	1.21323	15.1642	12.5977	0.830752	3.65509	-0.26751	0.278853
YGL256W	ADH4	1.12049	0.923562	1.21323	15.9521	12.9419	0.811298	3.69398	-0.301696	0.278853
YNL076W	MKS1	0.908888	0.749314	1.21296	18.1186	24.4512	1.34951	4.61183	0.432431	0.278533
YER074W	RPS24A	0.392439	0.323573	1.21283	98.5144	87.6307	0.889521	6.45336	-0.168899	0.278377
YNL003C	PET8	0.779743	0.642926	1.2128	22.8706	26.4569	1.15681	4.72557	0.210147	0.278346
YDL224C	WHI4	0.35134	0.289781	1.21243	26.1985	23.4778	0.896152	4.55323	-0.158185	0.277904
YDR045C	RPC11	0.763308	0.629642	1.21229	22.7346	13.7439	0.604537	3.78072	-0.726097	0.277733
YNR006W	VPS27	0.954573	0.787466	1.21221	12.791	14.1199	1.10389	3.81966	0.142595	0.277638
YAL061W	YAL061W	1.02838	0.848521	1.21197	25.686	47.6907	1.85668	5.57564	0.892728	0.277351
YMR134W	YMR134W	0.920703	0.759916	1.21159	18.625	23.9283	1.28474	4.58064	0.361471	0.276897
YML041C	VPS71	0.727413	0.600454	1.21144	16.4057	16.9254	1.03168	4.08112	0.0449966	0.276719
YDR100W	TVP15	0.845328	0.697869	1.2113	20.0426	29.9578	1.4947	4.90486	0.579861	0.276556
YOL015W	IRC10	1.12834	0.931841	1.21087	7.04964	8.4373	1.19684	3.07678	0.259231	0.276046
YOL016C	CMK2	1.12834	0.931841	1.21087	16.1322	38.8764	2.40986	5.28082	1.26895	0.276046
YOR173W	DCS2	1.00499	0.830175	1.21057	15.6618	33.8781	2.1631	5.08228	1.1131	0.275692
YDR530C	APA2	1.1526	0.952297	1.21034	15.6396	20.5869	1.31633	4.36365	0.396517	0.275407
YPR148C	YPR148C	1.04386	0.862522	1.21024	16.0308	17.4218	1.08677	4.12282	0.120041	0.275291
YDL035C	GPR1	0.799038	0.66026	1.21019	15.2755	21.3113	1.39513	4.41355	0.480397	0.275229
YDR363W-A	SEM1	0.566319	0.467968	1.21017	44.1933	28.9513	0.655107	4.85556	-0.610198	0.275205
YOR204W	DED1	0.624034	0.515988	1.2094	67.0791	43.0908	0.642388	5.42931	-0.638484	0.274286
YHR030C	SLT2	0.67344	0.556865	1.20934	15.1871	35.1699	2.31577	5.13627	1.21149	0.274223
YHR177W	YHR177W	0.378773	0.313232	1.20924	10.331	8.14654	0.78855	3.02619	-0.342726	0.274099
YOR020W-A	YOR020W-A	0.742459	0.614165	1.20889	19.9563	25.061	1.25579	4.64737	0.3286	0.273686
YLR227C	ADY4	0.639842	0.529341	1.20875	20.7898	17.4819	0.84089	4.12779	-0.25001	0.273517
YGR038W	ORM1	1.00205	0.829036	1.2087	26.4556	23.0915	0.872839	4.52929	-0.196212	0.273451
YLR453C	RIF2	0.851459	0.704619	1.2084	29.4243	38.3801	1.30437	5.26229	0.383353	0.273094
YBL067C	UBP13	0.648212	0.53652	1.20818	11.9269	9.97912	0.836691	3.31891	-0.257233	0.272832
YOR187W	TUF1	0.644152	0.533175	1.20815	28.3859	30.3104	1.0678	4.92174	0.0946369	0.272794
YDL045C	FAD1	0.849316	0.703021	1.20809	14.7438	17.4562	1.18397	4.12567	0.243633	0.272733
YMR087W	YMR087W	0.714637	0.591613	1.20795	22.6841	25.5464	1.12618	4.67505	0.171439	0.272556
YDL130W-A	STF1	0.766703	0.634824	1.20774	26.3909	39.5637	1.49914	5.3061	0.584135	0.272311
YBL099W	ATP1	0.550441	0.45576	1.20774	41.3432	38.4016	0.92885	5.2631	-0.106483	0.272311
YOR086C	TCB1	0.848526	0.702783	1.20738	22.9564	26.1791	1.14038	4.71034	0.189515	0.271879
YBL016W	FUS3	0.734702	0.609108	1.20619	21.113	22.3904	1.0605	4.48481	0.0847504	0.270459
YPR117W	YPR117W	0.977507	0.811047	1.20524	12.8685	12.6357	0.981913	3.65944	-0.0263333	0.269322
YNL020C	ARK1	1.16599	0.967703	1.20491	25.6846	29.1614	1.13537	4.86599	0.183157	0.268922
YLR201C	COQ9	0.830331	0.689494	1.20426	15.6304	22.0546	1.41101	4.46301	0.496727	0.268149
YLR178C	TFS1	1.15245	0.956981	1.20425	33.4566	68.8874	2.05901	6.10617	1.04195	0.26814
YOR209C	NPT1	0.950584	0.789363	1.20424	19.6789	28.5548	1.45103	4.83566	0.537082	0.268125
YDR533C	HSP31	0.731552	0.607608	1.20399	22.8994	65.8563	2.8759	6.04125	1.52401	0.267819
YIR015W	RPR2	1.14927	0.954844	1.20362	35.1548	28.8318	0.820139	4.84959	-0.286059	0.267378
YOR137C	SIA1	0.637089	0.529333	1.20357	13.3242	21.1503	1.58736	4.40261	0.666633	0.267319
YPR028W	YOP1	0.735342	0.610982	1.20354	52.9446	48.5226	0.916479	5.60058	-0.125827	0.267287
YJR127C	RSF2	0.629558	0.523229	1.20322	25.0432	21.1533	0.844673	4.40281	-0.243536	0.266895
YOR087W	YVC1	0.645541	0.536515	1.20321	11.5016	12.9825	1.12876	3.69849	0.174733	0.26689
YLR286C	CTS1	0.785555	0.65293	1.20312	124.565	185.103	1.48599	7.53218	0.571429	0.266784
YLR251W	SYM1	0.862393	0.717142	1.20254	26.4251	38.1208	1.4426	5.25251	0.528667	0.266087
YGR131W	YGR131W	1.095	0.910639	1.20245	14.0971	23.7093	1.68186	4.56738	0.750054	0.265978
YML006C	GIS4	0.769135	0.639704	1.20233	14.232	10.0129	0.703551	3.32379	-0.507272	0.265832
YDR381W	YRA1	0.558456	0.4646	1.20201	144.889	132.454	0.914172	7.04934	-0.129463	0.265454
YAR027W	UIP3	0.891152	0.741496	1.20183	16.7431	26.7082	1.59517	4.73921	0.673713	0.265233
YBR191W	RPL21A	0.567514	0.472239	1.20175	96.2172	81.9969	0.852206	6.3575	-0.230726	0.265138
YOR136W	IDH2	0.614742	0.51157	1.20168	28.6092	69.8294	2.44081	6.12576	1.28736	0.265048
YMR039C	SUB1	0.808241	0.672604	1.20166	24.4451	22.4955	0.920248	4.49157	-0.119905	0.265027
YPR138C	MEP3	0.560407	0.466364	1.20165	35.9075	36.8517	1.02629	5.20366	0.0374448	0.265019
YNL175C	NOP13	0.903787	0.752335	1.20131	13.8616	10.8752	0.784556	3.44297	-0.350051	0.264607
YOR134W	BAG7	0.89428	0.744452	1.20126	9.57086	18.093	1.89042	4.17736	0.918707	0.264549
YNL291C	MID1	1.01073	0.842007	1.20039	12.8195	7.9239	0.618111	2.98621	-0.694062	0.263501
YNL290W	RFC3	1.01073	0.842007	1.20039	23.5331	12.3305	0.523963	3.62415	-0.932464	0.263501
YDL085C-A	YDL085C-A	0.920852	0.767474	1.19985	21.9833	26.8365	1.22077	4.74612	0.287789	0.262851
YOR291W	YOR291W	0.719983	0.600326	1.19932	15.1132	15.3066	1.0128	3.93608	0.0183486	0.262216
YLR174W	IDP2	1.00965	0.841892	1.19926	18.4759	17.0612	0.923431	4.09265	-0.114923	0.262146
YHR091C	MSR1	0.952488	0.794299	1.19915	12.7678	13.1863	1.03278	3.72097	0.0465326	0.262018
YDR336W	YDR336W	0.95015	0.792424	1.19904	17.5412	13.352	0.761182	3.73899	-0.393686	0.261883
YER174C	GRX4	0.848242	0.707441	1.19903	18.4804	140.255	7.58938	7.13191	2.92398	0.261866
YGL148W	ARO2	1.24027	1.03439	1.19903	21.9726	43.0748	1.96038	5.42877	0.971136	0.261863
YNL300W	YNL300W	0.866194	0.722526	1.19884	78.3878	52.0744	0.664317	5.7025	-0.590056	0.261642
YOR043W	WHI2	0.749919	0.625541	1.19883	31.9178	35.4377	1.11028	5.14721	0.150924	0.261631
YBR080C	SEC18	0.85359	0.712076	1.19874	15.6356	17.2792	1.10512	4.11096	0.144201	0.261513
YBR117C	TKL2	1.05285	0.87858	1.19836	12.0945	14.9859	1.23907	3.90554	0.309254	0.261059
YBR005W	RCR1	1.03436	0.863268	1.19819	11.9808	21.7226	1.81313	4.44113	0.858479	0.26086
YBR004C	GPI18	1.03436	0.863268	1.19819	13.9734	17.8234	1.27552	4.1557	0.351089	0.26086
YKL104C	GFA1	0.566837	0.473319	1.19758	22.828	23.4701	1.02813	4.55275	0.0400226	0.260121
YPL070W	MUK1	1.02584	0.857305	1.19659	10.6142	12.9639	1.22137	3.69643	0.288498	0.258927
YPL071C	YPL071C	1.02584	0.857305	1.19659	15.804	11.6046	0.734282	3.53662	-0.445595	0.258927
YGR163W	GTR2	0.882761	0.737893	1.19633	17.155	14.8709	0.866854	3.89442	-0.20614	0.258613
YER068W	MOT2	0.760469	0.635696	1.19628	23.5694	74.0758	3.14288	6.21093	1.65209	0.258551
YER057C	HMF1	1.23599	1.03325	1.19621	24.5521	28.4735	1.15972	4.83155	0.213771	0.258472
YKL065C	YET1	0.984816	0.823315	1.19616	34.732	47.1	1.3561	5.55766	0.439462	0.25841
YDR213W	UPC2	1.00019	0.836312	1.19596	17.5271	10.2653	0.585678	3.3597	-0.77182	0.258164
YGL082W	YGL082W	0.933177	0.780289	1.19594	17.5965	18.9726	1.0782	4.24584	0.108627	0.258142
YBR149W	ARA1	0.822302	0.68761	1.19588	23.8947	41.6418	1.74272	5.37996	0.801342	0.258077
YJL076W	NET1	0.766027	0.640565	1.19586	21.2825	18.2198	0.856094	4.18744	-0.224159	0.258051
YJL077C	ICS3	0.766027	0.640565	1.19586	16.509	14.4925	0.877853	3.85723	-0.187949	0.258051
YHR027C	RPN1	1.08784	0.909819	1.19566	31.2962	21.3417	0.681927	4.41561	-0.55231	0.257813
YDR247W	VHS1	0.894942	0.748508	1.19563	16.8207	21.0748	1.25291	4.39745	0.325283	0.257777
YDR517W	GRH1	1.11056	0.928917	1.19555	21.3703	14.7814	0.691681	3.88571	-0.531821	0.25767
YKR027W	BCH2	0.533655	0.446506	1.19518	17.4794	15.2536	0.872663	3.93108	-0.196504	0.257226
YHL024W	RIM4	0.538976	0.450966	1.19516	17.2415	12.7772	0.741072	3.6755	-0.432314	0.257202
YLR026C	SED5	0.615757	0.515292	1.19497	14.6159	17.2993	1.1836	4.11265	0.243179	0.256971
YIL113W	SDP1	0.981865	0.82185	1.1947	9.92194	22.1857	2.23602	4.47156	1.16094	0.256651
YNL180C	RHO5	0.496687	0.415743	1.1947	38.8512	49.9721	1.28624	5.64305	0.363162	0.256647
YLR137W	YLR137W	1.51787	1.27072	1.1945	17.2366	12.9964	0.753998	3.70004	-0.407367	0.256408
YKR096W	YKR096W	0.935761	0.783679	1.19406	14.2777	14.7123	1.03044	3.87895	0.0432544	0.255877
YGR017W	YGR017W	0.929958	0.778965	1.19384	26.9006	29.9863	1.11471	4.90623	0.156665	0.255607
YKL064W	MNR2	0.852181	0.714124	1.19332	16.7141	18.9144	1.13164	4.24141	0.178417	0.254984
YHL006C	SHU1	1.04931	0.879578	1.19296	28.4266	24.6817	0.868258	4.62537	-0.203804	0.254551
YHL004W	MRP4	1.04931	0.879578	1.19296	24.6769	20.6848	0.838223	4.3705	-0.254594	0.254551
YDR420W	HKR1	0.661519	0.554745	1.19247	16.7582	17.1727	1.02474	4.10205	0.0352554	0.253956
YLR447C	VMA6	1.11724	0.937087	1.19225	29.879	31.1217	1.04159	4.95985	0.0587874	0.253684
YKL101W	HSL1	0.9277	0.778113	1.19224	19.818	12.3527	0.623309	3.62676	-0.681981	0.253679
YKL149C	DBR1	0.516888	0.433635	1.19199	14.656	22.2239	1.51637	4.47404	0.600625	0.253373
YDR461C-A	YDR461C-A	1.15926	0.972549	1.19198	69.8874	164.143	2.34868	7.35881	1.23185	0.253356
YDR462W	MRPL28	1.15926	0.972549	1.19198	24.7765	24.9985	1.00896	4.64377	0.0128647	0.253356
YMR319C	FET4	0.741265	0.621927	1.19188	17.5379	23.0022	1.31157	4.5237	0.391297	0.253244
YKL106W	AAT1	1.07153	0.899235	1.1916	18.1445	26.4017	1.45508	4.72256	0.541097	0.252905
YJR016C	ILV3	0.886478	0.743968	1.19155	39.2981	72.3588	1.84128	6.1771	0.880709	0.252844
YPR048W	TAH18	1.24406	1.04411	1.1915	11.1773	12.2327	1.09442	3.61267	0.130166	0.252778
YIL129C	TAO3	1.10052	0.923894	1.19118	13.3032	13.5404	1.01783	3.7592	0.0254973	0.25239
YJR131W	MNS1	1.05555	0.886155	1.19116	12.2719	19.074	1.55428	4.25353	0.636248	0.252367
YJL006C	CTK2	0.612358	0.514222	1.19084	15.6435	8.85922	0.56632	3.14718	-0.82031	0.251985
YLR136C	TIS11	1.51757	1.27467	1.19057	23.5363	14.4873	0.615529	3.85671	-0.700102	0.251646
YMR169C	ALD3	1.11734	0.938528	1.19052	16.539	24.9123	1.50628	4.63879	0.590986	0.251597
YIL110W	MNI1	0.911205	0.76556	1.19025	17.9008	16.847	0.941132	4.07442	-0.0875309	0.25126
YLR047C	FRE8	0.563594	0.473586	1.19006	12.5441	11.3118	0.901769	3.49976	-0.14917	0.25103
YLR048W	RPS0B	0.563594	0.473586	1.19006	97.2706	94.7268	0.973848	6.5657	-0.0382308	0.25103
YKL019W	RAM2	1.39349	1.17127	1.18973	14.4479	15.7665	1.09127	3.97879	0.126003	0.250631
YGR189C	CRH1	0.643913	0.541266	1.18964	53.9773	64.3724	1.19258	6.00837	0.25409	0.250529
YER098W	UBP9	0.646492	0.543497	1.1895	9.92181	8.58601	0.865368	3.10199	-0.208615	0.25036
YJR136C	YJR136C	0.913304	0.767965	1.18925	14.25	14.3206	1.00495	3.84002	0.00712708	0.250054
YEL066W	HPA3	1.35388	1.13904	1.18861	8.52505	7.76854	0.91126	2.95764	-0.134065	0.249277
YHL022C	SPO11	0.635055	0.534383	1.18839	7.99374	11.9966	1.50074	3.58455	0.585678	0.249008
YLR287C	YLR287C	0.684161	0.575743	1.18831	25.6355	22.964	0.895791	4.5213	-0.158767	0.24891
YKL127W	PGM1	0.969489	0.815935	1.18819	16.6621	11.7573	0.705633	3.55549	-0.50301	0.24877
YJR142W	YJR142W	1.08318	0.911651	1.18815	14.8861	13.6031	0.913811	3.76586	-0.130032	0.248714
YHR203C	RPS4B	0.441364	0.371514	1.18801	90.4412	72.5606	0.802295	6.18111	-0.317794	0.248552
YJL151C	SNA3	0.818532	0.689211	1.18764	51.8363	69.0723	1.33251	6.11004	0.414146	0.248094
YLR170C	APS1	1.11167	0.936414	1.18716	36.6212	35.6949	0.974706	5.15765	-0.0369617	0.247511
YIL099W	SGA1	0.496939	0.418642	1.18703	6.54138	7.98092	1.22007	2.99656	0.28696	0.247351
YHR141C	RPL42B	0.534706	0.450466	1.18701	98.6675	91.3641	0.92598	6.51356	-0.110948	0.24733
YHR195W	NVJ1	0.923441	0.778146	1.18672	19.9365	36.1014	1.81082	5.17398	0.856646	0.246978
YLR032W	RAD5	0.905548	0.763071	1.18671	11.0438	11.7204	1.06127	3.55096	0.0857935	0.246973
YOR090C	PTC5	1.03741	0.874341	1.1865	18.325	17.2813	0.943049	4.11114	-0.0845952	0.246714
YER093C	TSC11	1.28488	1.08308	1.18631	13.4877	13.0111	0.964664	3.70167	-0.051902	0.246486
YKR091W	SRL3	0.816083	0.68819	1.18584	13.1259	24.9092	1.89771	4.63861	0.924261	0.245908
YNL238W	KEX2	0.796583	0.671767	1.1858	20.9912	17.6374	0.840232	4.14057	-0.251141	0.245864
YJL210W	PEX2	0.839652	0.708166	1.18567	15.1512	24.5324	1.61918	4.61662	0.695262	0.245704
YMR104C	YPK2	0.64197	0.541563	1.1854	9.80849	15.4029	1.57036	3.94513	0.651098	0.245376
YBR276C	PPS1	1.05837	0.892862	1.18536	12.5106	8.96041	0.716223	3.16357	-0.481519	0.245328
YBR278W	DPB3	1.05837	0.892862	1.18536	16.7912	9.45199	0.562913	3.24062	-0.829017	0.245328
YGL156W	AMS1	0.719879	0.607382	1.18522	15.4782	21.0984	1.3631	4.39906	0.446896	0.24515
YHR026W	PPA1	1.04753	0.884019	1.18497	28.0715	22.4473	0.799648	4.48847	-0.322563	0.244847
YBR182C	SMP1	1.09617	0.925121	1.1849	9.2048	10.9069	1.18492	3.44717	0.244788	0.244763
YMR258C	YMR258C	0.858353	0.724417	1.18489	17.1664	22.6942	1.32202	4.50425	0.402739	0.244751
YOL110W	SHR5	0.865416	0.73057	1.18458	13.8319	17.4617	1.26243	4.12612	0.336201	0.244371
YOL111C	MDY2	0.865416	0.73057	1.18458	33.6277	33.5488	0.997654	5.06819	-0.00338835	0.244371
YGR056W	RSC1	0.640985	0.541414	1.18391	18.7771	16.0084	0.852552	4.00076	-0.23014	0.243556
YKL186C	MTR2	1.03606	0.875122	1.1839	27.0961	23.7793	0.877593	4.57163	-0.188377	0.243551
YOR231W	MKK1	0.777121	0.65643	1.18386	15.6101	15.4569	0.990186	3.95018	-0.0142282	0.243498
YER070W	RNR1	0.571656	0.483018	1.18351	104.586	13.9084	0.132985	3.79788	-2.91067	0.243072
YKR080W	MTD1	0.71268	0.602231	1.1834	22.8192	33.2455	1.4569	5.05509	0.542907	0.242939
YGL190C	CDC55	0.569309	0.481091	1.18337	29.9185	28.4709	0.951615	4.83141	-0.0715505	0.2429
YLR229C	CDC42	1.07059	0.904709	1.18335	25.0421	19.3462	0.77255	4.27398	-0.3723	0.242881
YPR036W	VMA13	0.529479	0.447447	1.18333	45.6897	76.1985	1.66774	6.25169	0.737893	0.242856
YKR015C	YKR015C	0.846669	0.715606	1.18315	12.4275	15.429	1.24152	3.94758	0.312108	0.242632
YHR084W	STE12	0.789273	0.667245	1.18288	20.7176	25.8262	1.24658	4.69076	0.317978	0.242307
YLR228C	ECM22	0.800635	0.677002	1.18262	7.7404	8.21711	1.06159	3.03863	0.0862235	0.241986
YOL014W	YOL014W	0.580038	0.490499	1.18255	9.76351	9.14405	0.936553	3.19283	-0.0945669	0.241895
YER075C	PTP3	0.827623	0.69991	1.18247	17.6533	9.82177	0.55637	3.29598	-0.845885	0.241805
YHL008C	YHL008C	0.911953	0.771269	1.18241	18.1393	17.9205	0.987938	4.16354	-0.0175077	0.241725
YKL128C	PMU1	0.807358	0.682847	1.18234	22.3326	43.7297	1.95811	5.45054	0.969459	0.241645
YGR046W	TAM41	0.911137	0.770656	1.18229	16.7763	16.5353	0.985631	4.04748	-0.0208803	0.241582
YER178W	PDA1	0.751522	0.635695	1.18221	24.5894	39.1703	1.59297	5.29169	0.671721	0.241481
YIL147C	SLN1	0.96949	0.820178	1.18205	13.2406	10.4726	0.790943	3.38854	-0.338354	0.241289
YGL187C	COX4	0.670482	0.567238	1.18201	23.2489	25.695	1.10521	4.68341	0.144321	0.241245
YPL232W	SSO1	0.818041	0.692278	1.18166	33.7217	25.4487	0.754668	4.66952	-0.406085	0.24082
YOR317W	FAA1	0.572822	0.484793	1.18158	36.7704	30.592	0.831972	4.93508	-0.265393	0.240718
YOR381W	FRE3	1.21877	1.03169	1.18133	7.78474	8.25854	1.06086	3.04589	0.0852373	0.240407
YCR028C	FEN2	0.805045	0.681573	1.18116	14.9192	10.9722	0.735443	3.45578	-0.443314	0.240201
YNL158W	PGA1	0.982405	0.831777	1.18109	28.9899	27.3978	0.945078	4.77599	-0.0814942	0.240121
YNL159C	ASI2	0.982405	0.831777	1.18109	21.4556	24.0794	1.12229	4.58973	0.166445	0.240121
YIL139C	REV7	0.850872	0.720654	1.18069	16.9868	21.1666	1.24606	4.40371	0.317372	0.239636
YDR409W	SIZ1	0.893142	0.756527	1.18058	14.571	13.8926	0.95344	3.79625	-0.0687855	0.239499
YER132C	PMD1	0.787478	0.667029	1.18058	15.4004	14.2305	0.924029	3.83091	-0.113991	0.23949
YNR010W	CSE2	0.923046	0.782073	1.18026	24.7506	20.9961	0.84831	4.39205	-0.237337	0.239099
YPL075W	GCR1	0.617585	0.523303	1.18017	30.7541	26.8027	0.871518	4.74431	-0.198397	0.238991
YOR322C	LDB19	0.823869	0.698452	1.17956	18.9793	17.9739	0.947024	4.16783	-0.0785279	0.238254
YNR067C	DSE4	0.661856	0.561159	1.17944	53.7452	66.1334	1.2305	6.04731	0.299244	0.238108
YPR116W	YPR116W	0.917659	0.778172	1.17925	11.8146	13.6973	1.15935	3.77582	0.213319	0.237869
YOL066C	RIB2	0.658554	0.558582	1.17897	14.4408	14.4247	0.998887	3.85047	-0.00160641	0.237533
YDR505C	PSP1	0.880864	0.747159	1.17895	18.5846	22.1964	1.19434	4.47225	0.256217	0.237504
YNL153C	GIM3	1.35232	1.14714	1.17887	22.7061	26.9392	1.18643	4.75164	0.246631	0.237402
YNL152W	YNL152W	1.35232	1.14714	1.17887	16.2484	17.5955	1.0829	4.13713	0.114903	0.237402
YBR104W	YMC2	0.747176	0.633875	1.17874	16.2189	36.2676	2.23613	5.18061	1.161	0.237248
YLR278C	YLR278C	0.558768	0.474055	1.1787	21.0922	22.265	1.0556	4.4767	0.0780685	0.237194
YBL018C	POP8	1.00056	0.848872	1.17869	19.3306	16.0116	0.828302	4.00104	-0.271771	0.237188
YGL162W	SUT1	1.21934	1.03476	1.17838	24.8432	38.3071	1.54195	5.25954	0.624758	0.236806
YER058W	PET117	1.30688	1.10922	1.1782	15.1315	27.3059	1.80458	4.77114	0.851664	0.236579
YNL189W	SRP1	0.799622	0.678685	1.17819	26.3224	24.3839	0.926353	4.60785	-0.110366	0.236576
YPR066W	UBA3	0.711148	0.603608	1.17816	28.6291	34.1602	1.1932	5.09425	0.254837	0.236537
YGL047W	ALG13	0.999675	0.848514	1.17815	27.4615	27.3821	0.99711	4.77516	-0.00417607	0.23652
YGL048C	RPT6	0.999675	0.848514	1.17815	24.1146	16.0381	0.665078	4.00343	-0.588404	0.23652
YLR116W	MSL5	0.844223	0.716848	1.17769	20.6242	17.1288	0.83052	4.09835	-0.267914	0.235957
YDR128W	YDR128W	0.934467	0.793519	1.17762	11.7342	9.88819	0.842679	3.30571	-0.246945	0.23588
YOR161C	PNS1	0.558142	0.474141	1.17717	23.2635	26.7357	1.14926	4.74069	0.2007	0.235318
YOL019W	YOL019W	0.615058	0.522504	1.17714	19.601	15.0947	0.770099	3.91597	-0.376885	0.235281
YKL053C-A	MDM35	0.819666	0.696359	1.17707	28.2124	39.764	1.40945	5.31339	0.495136	0.235205
YJL059W	YHC3	0.655342	0.556805	1.17697	14.6942	16.7798	1.14193	4.06865	0.191477	0.235075
YJR137C	ECM17	1.18041	1.00311	1.17675	14.3099	21.047	1.47081	4.39555	0.556607	0.23481
YKL176C	LST4	1.05914	0.900054	1.17675	18.1688	17.5141	0.963965	4.13044	-0.0529469	0.234808
YIL162W	SUC2	0.962104	0.817811	1.17644	6.91524	8.35646	1.20841	3.06289	0.273113	0.234425
YJL130C	URA2	0.389361	0.330995	1.17633	32.9439	23.0604	0.69999	4.52734	-0.514593	0.234298
YDR062W	LCB2	0.747849	0.635825	1.17619	24.653	23.2212	0.941922	4.53737	-0.0863208	0.234119
YGL057C	YGL057C	0.795851	0.676704	1.17607	16.8278	19.3025	1.14706	4.27072	0.197945	0.233973
YER119C	AVT6	1.19388	1.01516	1.17605	18.0035	16.2463	0.902399	4.02204	-0.148163	0.233946
YER120W	SCS2	1.19388	1.01516	1.17605	29.1499	22.9169	0.786172	4.51834	-0.347083	0.233946
YBR243C	ALG7	1.03521	0.880256	1.17603	14.8324	10.5709	0.712686	3.40202	-0.488661	0.233929
YML078W	CPR3	0.869451	0.739317	1.17602	26.6256	26.7668	1.0053	4.74237	0.00763059	0.233912
YFR003C	YPI1	1.22752	1.04379	1.17602	26.8386	28.1688	1.04956	4.81603	0.0697897	0.233908
YFR004W	RPN11	1.22752	1.04379	1.17602	30.8515	26.4918	0.85869	4.72748	-0.219791	0.233908
YDR288W	NSE3	1.08917	0.926184	1.17598	21.1193	18.3553	0.869128	4.19813	-0.202359	0.233862
YLR193C	UPS1	0.960768	0.81705	1.1759	16.2383	27.6697	1.70398	4.79023	0.768909	0.233765
YPR001W	CIT3	0.444499	0.378027	1.17584	7.34206	6.77015	0.922105	2.75919	-0.116997	0.23369
YLR270W	DCS1	1.15908	0.985761	1.17582	14.5864	26.4341	1.81224	4.72433	0.857777	0.23367
YPR009W	SUT2	0.642847	0.546755	1.17575	24.3662	18.3989	0.755101	4.20155	-0.405259	0.233582
YDR470C	UGO1	0.545156	0.463683	1.17571	14.8202	16.0975	1.08619	4.00877	0.119272	0.233529
YDR471W	RPL27B	0.545156	0.463683	1.17571	100.172	92.6855	0.925263	6.53427	-0.112064	0.233529
YBR294W	SUL1	0.745007	0.633717	1.17561	10.264	9.28375	0.904492	3.21471	-0.14482	0.233414
YJL039C	NUP192	0.991788	0.843897	1.17525	18.745	13.194	0.703864	3.72181	-0.506631	0.232964
YBL104C	YBL104C	0.967279	0.823078	1.1752	11.685	11.9568	1.02326	3.57976	0.033176	0.232903
YIL138C	TPM2	0.732501	0.623404	1.175	23.4307	25.4998	1.08831	4.67241	0.122085	0.232664
YER062C	HOR2	0.582355	0.495739	1.17472	26.9366	52.0237	1.93133	5.7011	0.949598	0.23232
YDR233C	RTN1	0.62219	0.529658	1.1747	73.2026	53.811	0.735096	5.74983	-0.443995	0.232296
YER035W	EDC2	0.739655	0.629792	1.17444	47.5581	73.5001	1.54548	6.19967	0.628055	0.231978
YCR023C	YCR023C	1.04897	0.893318	1.17425	16.4284	27.2334	1.6577	4.7673	0.729179	0.231734
YOR174W	MED4	1.23743	1.05412	1.1739	12.5887	9.86344	0.783514	3.30209	-0.35197	0.231304
YGL010W	YGL010W	1.00258	0.854066	1.17389	30.6778	26.6094	0.867382	4.73386	-0.20526	0.231294
YGL011C	SCL1	1.00258	0.854066	1.17389	38.5582	26.527	0.687974	4.72939	-0.539574	0.231294
YIL123W	SIM1	0.770951	0.656779	1.17383	45.0152	38.4213	0.853517	5.26383	-0.228507	0.23123
YJL200C	ACO2	0.639329	0.544671	1.17379	15.6498	43.9593	2.80893	5.4581	1.49002	0.231172
YPL256C	CLN2	0.738924	0.629521	1.17379	59.194	23.036	0.389162	4.52582	-1.36156	0.23117
YDL017W	CDC7	1.1637	0.991516	1.17366	12.131	10.5662	0.871012	3.40139	-0.199235	0.231008
YDR210W	YDR210W	0.950001	0.809474	1.1736	25.8314	27.6831	1.07168	4.79093	0.0998804	0.230945
YNL011C	YNL011C	1.06867	0.910672	1.1735	19.8566	18.8763	0.950632	4.2385	-0.0730418	0.230815
YML118W	NGL3	0.864902	0.737127	1.17334	9.2911	15.4345	1.66122	3.94809	0.73224	0.230624
YMR125W	STO1	0.771312	0.65743	1.17322	21.9569	15.986	0.728065	3.99874	-0.45786	0.230478
YDR096W	GIS1	0.963794	0.821663	1.17298	16.5948	17.068	1.02852	4.09322	0.0405669	0.230178
YHR179W	OYE2	0.790631	0.67405	1.17296	26.6393	29.4376	1.10505	4.87959	0.144106	0.230148
YBR044C	TCM62	0.887512	0.756851	1.17264	15.1897	44.8861	2.95503	5.4882	1.56317	0.229756
YBR187W	GDT1	0.789167	0.673084	1.17246	31.8685	21.5888	0.677433	4.43221	-0.561849	0.229544
YDL005C	MED2	0.920843	0.785545	1.17223	15.4952	16.6054	1.07165	4.05358	0.0998356	0.229261
YDL024C	DIA3	0.712975	0.608416	1.17186	5.14225	8.52141	1.65714	3.09109	0.728692	0.228795
YCR068W	ATG15	0.747613	0.638046	1.17172	11.56	13.0985	1.13308	3.71133	0.180253	0.228631
YMR243C	ZRC1	0.74624	0.636882	1.17171	29.9719	23.5091	0.784372	4.55515	-0.35039	0.228613
YDR242W	AMD2	0.822118	0.701642	1.17171	14.0138	37.0744	2.64557	5.21235	1.40358	0.22861
YNL053W	MSG5	0.702557	0.599651	1.17161	23.9861	15.7202	0.655388	3.97455	-0.609579	0.228491
YMR092C	AIP1	0.926047	0.790498	1.17147	16.5296	22.1215	1.33829	4.46737	0.420395	0.228324
YOR108W	LEU9	0.557464	0.475899	1.17139	25.5442	30.1044	1.17852	4.9119	0.236982	0.228224
YOR273C	TPO4	0.546984	0.46708	1.17107	40.2774	57.9625	1.43908	5.85705	0.525148	0.227831
YNL306W	MRPS18	1.15789	0.988943	1.17083	29.263	29.5223	1.00886	4.88373	0.0127238	0.227534
YPL140C	MKK2	0.847503	0.723857	1.17082	9.74545	11.9707	1.22834	3.58144	0.296708	0.227514
YGR035C	YGR035C	0.503736	0.430291	1.17069	18.4866	18.4244	0.996636	4.20355	-0.00486144	0.227355
YGL062W	PYC1	0.476556	0.407076	1.17068	19.4956	38.5762	1.97872	5.26964	0.984565	0.227347
YDR061W	YDR061W	0.788933	0.673926	1.17065	16.8958	15.7737	0.933587	3.97945	-0.0991443	0.227313
YPL112C	PEX25	0.817932	0.698772	1.17053	15.9575	14.4754	0.907128	3.85554	-0.140623	0.227159
YHR085W	IPI1	0.702386	0.600147	1.17036	14.3747	10.8294	0.753367	3.43689	-0.408576	0.226948
YER156C	YER156C	0.969182	0.828177	1.17026	43.4183	29.5681	0.681006	4.88597	-0.55426	0.226828
YBR239C	YBR239C	0.530687	0.453536	1.17011	17.9191	16.4203	0.916357	4.03741	-0.126018	0.226642
YDR170C	SEC7	0.68504	0.585496	1.17002	15.6129	12.2909	0.787226	3.61952	-0.34515	0.22653
YPL269W	KAR9	0.955044	0.81633	1.16992	14.2347	30.5041	2.14294	4.93093	1.09959	0.226415
YKR089C	TGL4	0.43766	0.374098	1.16991	25.8807	34.7591	1.34305	5.11932	0.425516	0.226393
YKR090W	PXL1	0.43766	0.374098	1.16991	23.2271	16.5982	0.714608	4.05296	-0.484777	0.226393
YJL072C	PSF2	1.08009	0.923754	1.16924	17.3109	22.3495	1.29107	4.48217	0.368563	0.225574
YJL071W	ARG2	1.08009	0.923754	1.16924	9.96759	25.7008	2.57844	4.68374	1.3665	0.225574
YNR034W-A	YNR034W-A	1.27206	1.08806	1.16912	24.0595	41.3795	1.71989	5.37084	0.782312	0.225418
YNL287W	SEC21	0.690423	0.590608	1.169	26.2128	21.4372	0.817814	4.42205	-0.290154	0.225279
YDL036C	PUS9	0.861825	0.737262	1.16895	14.7836	9.59849	0.649266	3.26281	-0.623118	0.225217
YGR241C	YAP1802	0.474785	0.40618	1.1689	24.8882	17.6895	0.710758	4.14482	-0.492569	0.225157
YGR243W	FMP43	0.474785	0.40618	1.1689	19.3379	22.9292	1.18571	4.51912	0.245754	0.225157
YIL017C	VID28	1.12281	0.960637	1.16882	16.8602	24.8901	1.47626	4.6375	0.561951	0.225056
YDR071C	PAA1	0.610341	0.522312	1.16854	21.715	26.4651	1.21874	4.72602	0.285396	0.224703
YPL051W	ARL3	0.969412	0.829638	1.16847	12.7407	12.4383	0.976261	3.63671	-0.0346618	0.224627
YDL072C	YET3	0.867463	0.742434	1.1684	33.248	32.1013	0.965509	5.00456	-0.0506379	0.22454
YBL088C	TEL1	1.0428	0.892584	1.16829	11.6832	11.748	1.00555	3.55434	0.00798278	0.224399
YDR475C	JIP4	1.00553	0.860872	1.16803	20.2814	27.51	1.35642	4.78189	0.439802	0.224081
YJL078C	PRY3	0.442522	0.378916	1.16786	32.5634	43.544	1.3372	5.4444	0.41922	0.223869
YKL203C	TOR2	0.785571	0.672674	1.16783	11.1797	10.0016	0.894625	3.32216	-0.160645	0.223833
YPR147C	YPR147C	1.13859	0.975112	1.16765	11.5248	13.4165	1.16415	3.74594	0.219276	0.223608
YGR016W	YGR016W	1.02486	0.87803	1.16723	10.8023	14.6853	1.35947	3.8763	0.443044	0.223088
YGR015C	YGR015C	1.02486	0.87803	1.16723	19.2282	19.5117	1.01474	4.28627	0.0211114	0.223088
YER115C	SPR6	0.718519	0.615646	1.1671	17.0201	15.2155	0.893974	3.92747	-0.161694	0.222924
YPL273W	SAM4	0.745187	0.638501	1.16709	21.2625	59.4585	2.7964	5.89381	1.48357	0.222915
YMR250W	GAD1	0.974962	0.835396	1.16707	20.4554	48.2264	2.35763	5.59175	1.23734	0.222886
YHL002W	HSE1	1.15261	0.98797	1.16664	24.5607	41.0055	1.66956	5.35774	0.739467	0.222361
YHR210C	YHR210C	0.861934	0.738977	1.16639	6.82657	8.55261	1.25284	3.09637	0.325204	0.222048
YOL009C	MDM12	1.00842	0.864613	1.16632	10.2323	17.2822	1.68898	4.11121	0.756154	0.221967
YOL008W	COQ10	1.00842	0.864613	1.16632	24.849	22.3741	0.900405	4.48376	-0.151354	0.221967
YPR156C	TPO3	0.565331	0.48472	1.1663	32.6243	19.9515	0.611552	4.31842	-0.709452	0.221944
YHL007C	STE20	0.884114	0.758125	1.16618	27.455	19.0783	0.694892	4.25386	-0.525138	0.221796
YDR334W	SWR1	0.697171	0.597832	1.16617	17.1126	13.8967	0.812074	3.79667	-0.300317	0.221773
YDR333C	YDR333C	0.697171	0.597832	1.16617	17.8355	17.3507	0.97282	4.11692	-0.0397555	0.221773
YDL204W	RTN2	1.10286	0.945736	1.16614	18.8526	33.595	1.78198	5.07018	0.833483	0.221745
YDL205C	HEM3	1.10286	0.945736	1.16614	22.4389	19.1223	0.852197	4.25719	-0.230742	0.221745
YCR069W	CPR4	1.14475	0.981695	1.1661	21.3344	26.9732	1.2643	4.75345	0.338343	0.221686
YDR519W	FPR2	1.01427	0.869882	1.16599	24.0997	19.4416	0.806713	4.28107	-0.309873	0.221549
YML003W	YML003W	0.965421	0.828022	1.16594	10.4739	11.3047	1.07932	3.49885	0.11012	0.221488
YOL045W	PSK2	0.77165	0.661837	1.16592	12.5957	12.0183	0.95416	3.58716	-0.0676963	0.221472
YOL047C	YOL047C	0.77165	0.661837	1.16592	8.72976	18.2456	2.09004	4.18947	1.06353	0.221472
YMR317W	YMR317W	0.845396	0.725184	1.16577	11.3576	11.3595	1.00017	3.50583	0.000239807	0.22128
YMR010W	YMR010W	0.813954	0.698292	1.16564	28.1852	19.3316	0.685877	4.27289	-0.543979	0.221118
YGR256W	GND2	0.524837	0.450346	1.16541	7.33125	8.45958	1.15391	3.08059	0.206529	0.220837
YGR255C	COQ6	0.524837	0.450346	1.16541	14.2136	18.1926	1.27995	4.18528	0.356085	0.220837
YDR005C	MAF1	0.771724	0.66222	1.16536	17.6073	15.4415	0.876993	3.94874	-0.189362	0.220776
YPL163C	SVS1	0.697045	0.59831	1.16502	48.1354	33.3468	0.69277	5.05948	-0.529551	0.220359
YKL162C	YKL162C	0.813649	0.698522	1.16481	6.42286	8.57729	1.33543	3.10052	0.417305	0.2201
YCR009C	RVS161	0.910261	0.781466	1.16481	25.8062	26.4265	1.02404	4.72391	0.0342659	0.220098
YNR061C	YNR061C	0.881857	0.757253	1.16455	15.447	14.2949	0.925411	3.83743	-0.111834	0.21977
YOR299W	BUD7	1.07095	0.919725	1.16442	21.737	18.3864	0.845854	4.20056	-0.241519	0.219616
YNL253W	TEX1	0.893707	0.767574	1.16433	10.0128	10.4875	1.04741	3.3906	0.0668282	0.219496
YNR058W	BIO3	1.21671	1.04504	1.16427	7.12051	18.3167	2.57239	4.19509	1.36311	0.219429
YNR056C	BIO5	1.21671	1.04504	1.16427	7.57698	23.4061	3.08911	4.54881	1.62719	0.219429
YNR057C	BIO4	1.21671	1.04504	1.16427	10.9597	26.789	2.44431	4.74357	1.28943	0.219429
YEL001C	YEL001C	0.923211	0.79327	1.1638	22.9195	20.5257	0.895559	4.35936	-0.159139	0.218849
YJL178C	ATG27	0.440837	0.378877	1.16354	19.1355	20.2333	1.05737	4.33866	0.0804781	0.218516
YGR148C	RPL24B	0.584934	0.502815	1.16332	79.9721	75.9781	0.950057	6.24751	-0.0739142	0.218246
YGR149W	YGR149W	0.584934	0.502815	1.16332	15.8338	20.689	1.30664	4.3708	0.385859	0.218246
YPL003W	ULA1	0.764777	0.657625	1.16294	20.9831	28.0326	1.33596	4.80904	0.417876	0.217774
YPL004C	LSP1	0.764777	0.657625	1.16294	74.0646	115.797	1.56345	6.85545	0.644738	0.217774
YGL110C	CUE3	0.924627	0.795142	1.16284	15.0963	15.6293	1.03531	3.96618	0.0500638	0.217658
YHR198C	FMP22	1.01622	0.873911	1.16284	19.2942	20.1956	1.04672	4.33597	0.0658766	0.217658
YER001W	MNN1	0.430211	0.369979	1.1628	37.7494	23.8208	0.631025	4.57415	-0.664231	0.2176
YOR382W	FIT2	1.08065	0.929386	1.16276	11.5701	11.695	1.0108	3.54782	0.0154984	0.21755
YBL098W	BNA4	0.630078	0.541925	1.16267	8.80941	12.8912	1.46334	3.68831	0.549269	0.217437
YKL096W-A	CWP2	0.141427	0.121643	1.16264	492.719	347.475	0.70522	8.44077	-0.503856	0.217406
YFR053C	HXK1	0.655125	0.563639	1.16231	56.5926	56.3253	0.995277	5.81571	-0.0068305	0.217
YDR058C	TGL2	0.516336	0.444232	1.16231	11.159	11.9336	1.06942	3.57696	0.0968256	0.216996
YEL011W	GLC3	1.23752	1.0647	1.16231	17.6762	26.0707	1.4749	4.70436	0.560621	0.216994
YLL032C	YLL032C	0.698301	0.600873	1.16214	11.7942	7.10606	0.602504	2.82905	-0.730958	0.216789
YCR027C	RHB1	0.63403	0.545603	1.16207	16.3276	13.2299	0.810278	3.72573	-0.303511	0.216699
YGL134W	PCL10	0.714054	0.614476	1.16205	21.543	21.4266	0.994601	4.42133	-0.00781082	0.216677
YGL178W	MPT5	0.801493	0.689749	1.16201	22.5848	26.043	1.15312	4.70282	0.205542	0.216618
YLR430W	SEN1	0.803182	0.691231	1.16196	12.9873	8.84986	0.681423	3.14565	-0.553377	0.216559
YDL085W	NDE2	1.19478	1.02827	1.16193	15.3787	20.9021	1.35915	4.38557	0.442709	0.216529
YPL154C	PEP4	0.65949	0.567582	1.16193	33.6774	56.6238	1.68136	5.82334	0.749628	0.216522
YML017W	PSP2	0.559723	0.481726	1.16191	17.726	27.3407	1.5424	4.77298	0.625181	0.216499
YML018C	YML018C	0.559723	0.481726	1.16191	21.1289	15.4283	0.730201	3.94751	-0.453635	0.216499
YMR044W	IOC4	0.636592	0.5479	1.16188	17.5994	14.8102	0.841518	3.88852	-0.248933	0.216456
YOR047C	STD1	0.63364	0.545386	1.16182	24.8723	24.5733	0.987978	4.61902	-0.0174485	0.216384
YJR139C	HOM6	1.02299	0.88075	1.1615	24.4001	25.1676	1.03145	4.65349	0.0446766	0.215993
YML046W	PRP39	0.908868	0.78252	1.16146	15.3125	12.854	0.839443	3.68414	-0.252496	0.215944
YML047C	PRM6	0.908868	0.78252	1.16146	5.65552	5.35336	0.946572	2.42044	-0.0792156	0.215944
YGR092W	DBF2	0.703463	0.605678	1.16145	23.032	19.7572	0.857812	4.3043	-0.221267	0.215924
YGR082W	TOM20	1.17033	1.00772	1.16136	18.9481	19.3153	1.01938	4.27167	0.0276908	0.215819
YGR081C	SLX9	1.17033	1.00772	1.16136	24.3451	22.6881	0.931938	4.50386	-0.101695	0.215819
YJR100C	YJR100C	1.20892	1.04096	1.16134	14.4546	13.7818	0.953454	3.78469	-0.0687641	0.215796
YNR055C	HOL1	0.627844	0.540628	1.16132	18.5011	23.2901	1.25885	4.54164	0.332103	0.215769
YOL001W	PHO80	0.825904	0.711214	1.16126	19.7168	18.3701	0.931698	4.19929	-0.102066	0.215691
YOL032W	OPI10	0.684899	0.589825	1.16119	15.8356	16.4099	1.03627	4.0365	0.051393	0.215605
YLR357W	RSC2	0.898238	0.773638	1.16106	18.8224	13.9543	0.74137	3.80264	-0.431735	0.21544
YHR002W	LEU5	0.749766	0.645763	1.16105	19.9815	19.8124	0.991538	4.30833	-0.0122602	0.215436
YJL147C	YJL147C	1.29001	1.1112	1.16092	15.9502	13.6766	0.857455	3.77364	-0.221867	0.215265
YDR447C	RPS17B	0.680728	0.586392	1.16088	86.6805	62.3624	0.719451	5.9626	-0.475032	0.215213
YCR066W	RAD18	0.947828	0.816479	1.16087	12.0701	14.7612	1.22296	3.88374	0.290373	0.215209
YDR499W	LCD1	0.969237	0.835128	1.16059	19.7778	15.9431	0.806109	3.99486	-0.310953	0.214852
YGR257C	MTM1	0.975686	0.840807	1.16042	15.0199	17.3371	1.15428	4.11579	0.206993	0.214642
YDR293C	SSD1	0.880955	0.759393	1.16008	25.8758	34.9662	1.35131	5.12789	0.434356	0.214222
YDL134C	PPH21	0.569841	0.491217	1.16006	25.0774	28.9803	1.15563	4.857	0.208684	0.214199
YPL006W	NCR1	1.64513	1.41839	1.15986	13.0398	20.9254	1.60473	4.38718	0.682333	0.213952
YDR389W	SAC7	0.773396	0.666827	1.15982	21.5116	18.5311	0.861448	4.21188	-0.215164	0.213896
YLR089C	ALT1	0.895326	0.771977	1.15978	15.7925	37.2024	2.35571	5.21733	1.23616	0.213855
YDR262W	YDR262W	0.480999	0.41479	1.15962	25.0787	32.0096	1.27636	5.00043	0.352039	0.213654
YOR092W	ECM3	0.814272	0.702292	1.15945	23.289	16.9044	0.725855	4.07933	-0.462247	0.21344
YKL198C	PTK1	0.772389	0.666229	1.15934	25.4354	17.4139	0.684631	4.12217	-0.5466	0.213308
YBR247C	ENP1	0.705482	0.608614	1.15916	13.5905	6.433	0.473347	2.68549	-1.07903	0.213083
YER071C	YER071C	1.08809	0.938702	1.15915	37.0433	24.5377	0.662406	4.61693	-0.594212	0.213064
YPR114W	YPR114W	0.757151	0.653305	1.15896	37.8891	31.6596	0.835586	4.98457	-0.25914	0.212825
YMR211W	DML1	0.766124	0.661109	1.15885	13.8931	11.4589	0.824791	3.51839	-0.2779	0.212691
YIR005W	IST3	0.739562	0.638233	1.15876	15.8972	29.0399	1.82674	4.85997	0.869269	0.212588
YPR166C	MRP2	1.0232	0.883094	1.15865	33.0808	42.7143	1.29121	5.41665	0.368726	0.212444
YLR224W	YLR224W	1.09019	0.940937	1.15862	21.8599	21.5518	0.985906	4.42973	-0.0204781	0.212404
YGR267C	FOL2	0.973398	0.840159	1.15859	27.1774	52.3722	1.92705	5.71073	0.946394	0.212368
YLR121C	YPS3	0.767509	0.66247	1.15856	18.1196	35.1874	1.94196	5.13699	0.957512	0.21233
YOL025W	LAG2	0.717896	0.619662	1.15853	10.0142	12.933	1.29146	3.69298	0.369005	0.212292
YLR164W	YLR164W	1.01222	0.873829	1.15837	17.1449	23.2604	1.3567	4.5398	0.440099	0.212095
YJL133C-A	YJL133C-A	0.359319	0.310198	1.15835	68.8561	111.308	1.61654	6.79842	0.692906	0.212076
YJL133W	MRS3	0.359319	0.310198	1.15835	24.8155	25.249	1.01747	4.65816	0.0249883	0.212076
YNL277W	MET2	0.733161	0.63297	1.15829	15.1352	21.1897	1.40003	4.40529	0.485454	0.211991
YDR011W	SNQ2	0.559122	0.482732	1.15824	20.6527	51.8089	2.50858	5.69513	1.32687	0.21194
YKR087C	OMA1	0.982874	0.848635	1.15818	20.3033	16.7491	0.824944	4.06601	-0.277632	0.211863
YKR003W	OSH6	0.909287	0.78533	1.15784	24.9209	26.1935	1.05107	4.71114	0.0718553	0.211437
YBR200W	BEM1	0.900409	0.777695	1.15779	10.9746	10.6574	0.9711	3.41379	-0.0423081	0.211375
YOR210W	RPB10	0.859234	0.742139	1.15778	37.4838	19.9889	0.533268	4.32113	-0.907067	0.211362
YGR042W	YGR042W	1.25572	1.08471	1.15766	13.9452	18.403	1.31966	4.20187	0.400168	0.211206
YER063W	THO1	0.918788	0.793679	1.15763	61.1642	39.4463	0.644924	5.30182	-0.632798	0.211176
YDR339C	FCF1	0.784394	0.677619	1.15757	24.3345	14.5398	0.597496	3.86193	-0.742999	0.211104
YLR163C	MAS1	1.01569	0.877706	1.15721	21.6312	25.727	1.18935	4.68521	0.250169	0.210647
YOL088C	MPD2	0.772149	0.667371	1.157	19.7533	15.704	0.795005	3.97306	-0.330963	0.21039
YEL025C	YEL025C	1.11191	0.961117	1.15689	17.7967	16.1189	0.905725	4.01068	-0.142855	0.210253
YOL097W-A	YOL097W-A	1.01819	0.880207	1.15676	69.5036	56.2895	0.809879	5.81479	-0.304222	0.210095
YOL098C	YOL098C	1.01819	0.880207	1.15676	17.7437	16.6602	0.938939	4.05834	-0.0908967	0.210095
YPR026W	ATH1	0.822415	0.711003	1.1567	10.3489	16.5057	1.59493	4.0449	0.673492	0.21001
YBL019W	APN2	0.982744	0.849696	1.15658	12.0649	12.3912	1.02705	3.63125	0.0385032	0.20987
YLR390W	ECM19	1.17879	1.0193	1.15648	29.4105	38.9933	1.32583	5.28516	0.406895	0.209738
YBR059C	AKL1	0.694423	0.600485	1.15644	16.774	22.8128	1.36001	4.51177	0.443618	0.209688
YIL036W	CST6	0.653821	0.565402	1.15638	20.5513	28.8611	1.40434	4.85105	0.489897	0.209618
YIL037C	PRM2	0.653821	0.565402	1.15638	10.4246	12.8444	1.23211	3.68306	0.301136	0.209618
YOR348C	PUT4	0.554364	0.479441	1.15627	3.97212	4.66772	1.17512	2.22272	0.232809	0.20948
YAL028W	FRT2	0.725377	0.627448	1.15608	10.4331	21.1314	2.02541	4.40132	1.01822	0.209236
YAL029C	MYO4	0.725377	0.627448	1.15608	16.9629	14.3278	0.844659	3.84075	-0.243559	0.209236
YKL129C	MYO3	0.895142	0.774459	1.15583	13.2369	18.6417	1.40832	4.22046	0.49397	0.208927
YJL137C	GLG2	0.793878	0.686863	1.1558	18.2151	20.1119	1.10414	4.32998	0.142919	0.208896
YGL160W	YGL160W	1.1466	0.992051	1.15578	10.23	11.9432	1.16747	3.57811	0.223384	0.208872
YGL161C	YIP5	1.1466	0.992051	1.15578	17.8994	25.6749	1.4344	4.68229	0.520449	0.208872
YDR007W	TRP1	0.926211	0.801502	1.15559	26.6544	25.8632	0.970318	4.69283	-0.0434699	0.208634
YDR006C	SOK1	0.926211	0.801502	1.15559	22.7396	17.4226	0.76618	4.12289	-0.384245	0.208634
YGL059W	YGL059W	0.955646	0.82699	1.15557	14.9601	59.1686	3.9551	5.88676	1.98371	0.208605
YOL101C	IZH4	1.06203	0.919063	1.15556	11.7954	9.462	0.802178	3.24214	-0.318006	0.208592
YOR192C	THI72	1.3182	1.14078	1.15553	7.13971	9.34225	1.30849	3.22377	0.387903	0.208553
YOR237W	HES1	0.946098	0.818782	1.1555	4.70078	6.35899	1.35275	2.6688	0.435898	0.208511
YNL307C	MCK1	1.27381	1.10247	1.15541	25.9438	18.3602	0.70769	4.19851	-0.49881	0.208409
YOR069W	VPS5	0.995578	0.861703	1.15536	17.0098	15.8659	0.932752	3.98786	-0.100434	0.208344
YOR067C	ALG8	0.995578	0.861703	1.15536	13.2943	11.3521	0.853914	3.50489	-0.227838	0.208344
YLL008W	DRS1	1.1658	1.00904	1.15535	14.6605	5.43374	0.370638	2.44195	-1.43192	0.208335
YLL009C	COX17	1.1658	1.00904	1.15535	28.3558	32.0569	1.13052	5.00256	0.176988	0.208335
YDR304C	CPR5	0.954407	0.826076	1.15535	19.0303	26.2034	1.37693	4.71168	0.461453	0.208331
YFL029C	CAK1	1.02436	0.886728	1.15521	9.36779	20.6474	2.20408	4.36789	1.14018	0.208155
YLR142W	PUT1	0.902079	0.780894	1.15519	7.7255	8.03331	1.03984	3.00599	0.0563662	0.208127
YFR017C	YFR017C	0.591056	0.511812	1.15483	10.7995	15.5761	1.44229	3.96126	0.528366	0.207683
YDR266C	YDR266C	0.85748	0.742622	1.15467	18.7487	17.01	0.907262	4.08831	-0.140409	0.207475
YNL012W	SPO1	0.710855	0.615758	1.15444	9.57814	9.57119	0.999275	3.2587	-0.00104668	0.207192
YNL197C	WHI3	0.796539	0.690024	1.15436	28.8144	15.8251	0.549208	3.98414	-0.864576	0.207099
YNL096C	RPS7B	0.494142	0.428074	1.15434	79.1817	76.6534	0.968069	6.26028	-0.0468182	0.207066
YKL197C	PEX1	1.23538	1.07024	1.1543	11.0151	10.8206	0.982344	3.4357	-0.0256994	0.207015
YOL105C	WSC3	0.534928	0.463522	1.15405	20.097	14.9646	0.744619	3.90348	-0.425426	0.206707
YGL001C	ERG26	0.587511	0.509092	1.15404	14.7733	12.9628	0.877445	3.6963	-0.18862	0.206689
YLR389C	STE23	0.915136	0.793018	1.15399	16.9937	17.091	1.00573	4.09516	0.00823889	0.206632
YDL010W	YDL010W	1.11171	0.963584	1.15372	20.3834	17.5172	0.859384	4.1307	-0.218624	0.206298
YPR139C	VPS66	0.771998	0.66921	1.1536	17.232	24.8857	1.44415	4.63724	0.530222	0.206138
YPR140W	TAZ1	0.771998	0.66921	1.1536	14.4195	14.7922	1.02584	3.88676	0.0368092	0.206138
YDL128W	VCX1	0.705699	0.611739	1.15359	30.6641	26.5703	0.866493	4.73174	-0.20674	0.206136
YHR207C	SET5	0.986424	0.855123	1.15355	11.115	10.7313	0.965481	3.42375	-0.0506799	0.206076
YMR034C	YMR034C	0.993471	0.861288	1.15347	11.0721	17.2562	1.55853	4.10904	0.640184	0.205982
YMR035W	IMP2	0.993471	0.861288	1.15347	15.5068	14.7183	0.94915	3.87953	-0.0752924	0.205982
YDR273W	DON1	0.835303	0.724287	1.15328	10.5301	10.0926	0.958455	3.33523	-0.0612178	0.205738
YOR008C	SLG1	0.843292	0.731246	1.15323	21.3741	14.9963	0.701612	3.90654	-0.511254	0.205674
YHR169W	DBP8	0.823102	0.713811	1.15311	17.0179	8.63723	0.507538	3.11057	-0.978412	0.205529
YDR004W	RAD57	0.836129	0.725171	1.15301	20.1335	17.012	0.84496	4.08848	-0.243046	0.205405
YLR326W	YLR326W	1.05792	0.917534	1.153	11.0126	20.5765	1.86845	4.36293	0.901844	0.205397
YBR081C	SPT7	0.831153	0.720882	1.15297	12.1643	13.2819	1.09188	3.73139	0.126815	0.205352
YOR176W	HEM15	1.08095	0.9376	1.1529	21.7023	18.5608	0.855247	4.21419	-0.225587	0.205263
YBR221C	PDB1	0.838924	0.727735	1.15279	24.3161	28.1158	1.15626	4.81331	0.209469	0.205127
YOR045W	TOM6	1.02102	0.885733	1.15274	37.7577	34.2299	0.906569	5.09719	-0.141512	0.205071
YKR079C	TRZ1	0.933638	0.809989	1.15266	15.8289	10.2591	0.648126	3.35884	-0.625654	0.204961
YDR285W	ZIP1	0.798747	0.692975	1.15263	7.69316	8.38592	1.09005	3.06797	0.124392	0.204934
YDR284C	DPP1	0.798747	0.692975	1.15263	24.0201	25.9154	1.07891	4.69574	0.109568	0.204934
YDR065W	YDR065W	0.897861	0.77906	1.15249	21.793	22.8168	1.04698	4.51202	0.0662288	0.204758
YMR300C	ADE4	0.864666	0.750311	1.15241	17.63	23.4969	1.33277	4.5544	0.414432	0.204655
YOL018C	TLG2	0.807506	0.700762	1.15232	11.18	13.6554	1.22141	3.7714	0.288552	0.204547
YOL017W	ESC8	0.807506	0.700762	1.15232	13.1235	11.8716	0.904605	3.56944	-0.144641	0.204547
YJR105W	ADO1	0.765519	0.6644	1.1522	37.559	26.2011	0.697599	4.71156	-0.51953	0.204386
YGL222C	EDC1	1.04735	0.909045	1.15215	32.0932	39.984	1.24587	5.32135	0.317153	0.204324
YJR133W	XPT1	0.85821	0.744972	1.152	17.8979	14.5552	0.813234	3.86346	-0.298258	0.204145
YFR007W	YFR007W	1.20122	1.04287	1.15185	14.663	18.1205	1.23579	4.17955	0.305439	0.203947
YKL006C-A	SFT1	1.07428	0.932716	1.15177	32.7274	34.5162	1.05466	5.1092	0.076774	0.203856
YNR045W	PET494	0.835665	0.725588	1.15171	17.4865	18.3251	1.04796	4.19575	0.0675784	0.203773
YKL094W	YJU3	1.12988	0.981123	1.15162	27.6516	26.7518	0.96746	4.74156	-0.0477254	0.203664
YIL021W	RPB3	0.835376	0.725473	1.15149	23.232	18.551	0.79851	4.21342	-0.324618	0.203504
YBL029W	YBL029W	0.532498	0.462472	1.15142	20.3479	15.7213	0.772625	3.97465	-0.372159	0.203409
YPL067C	YPL067C	0.814713	0.707596	1.15138	15.1575	12.5933	0.830827	3.65458	-0.26738	0.203366
YDR051C	YDR051C	0.884338	0.768201	1.15118	18.7598	14.7911	0.788446	3.88666	-0.342916	0.203114
YOL054W	PSH1	0.670397	0.582418	1.15106	8.29774	6.16823	0.743362	2.62486	-0.427863	0.20296
YIL049W	DFG10	0.750948	0.652437	1.15099	30.3137	38.9359	1.28443	5.28303	0.361129	0.202875
YDR125C	ECM18	0.769988	0.669008	1.15094	11.5625	13.0515	1.12878	3.70615	0.174766	0.202813
YER061C	CEM1	1.00017	0.869099	1.15082	10.0201	18.998	1.89599	4.24778	0.922952	0.202657
YCL049C	YCL049C	1.22348	1.06318	1.15078	13.8458	16.0953	1.16247	4.00857	0.217189	0.20261
YCL048W-A	YCL048W-A	1.22348	1.06318	1.15078	6.3292	7.95512	1.25689	2.99188	0.329862	0.20261
YDR377W	ATP17	0.756117	0.657076	1.15073	30.3692	30.7683	1.01314	4.94337	0.0188358	0.202548
YIL048W	NEO1	0.921223	0.800573	1.1507	19.45	19.3101	0.992811	4.27129	-0.0104095	0.202518
YJR024C	YJR024C	1.05843	0.919851	1.15066	18.9115	42.9375	2.27045	5.42417	1.18298	0.202456
YJR101W	RSM26	0.811288	0.705124	1.15056	20.3035	17.5272	0.863257	4.13152	-0.212138	0.202337
YDL235C	YPD1	0.776531	0.674919	1.15055	30.4095	27.6004	0.907623	4.78662	-0.139835	0.202329
YOR306C	MCH5	0.665358	0.578387	1.15037	25.9983	23.7063	0.911844	4.5672	-0.133142	0.202097
YPR034W	ARP7	0.937894	0.815371	1.15027	21.8722	13.4619	0.615481	3.75081	-0.700214	0.201968
YOL083W	YOL083W	0.753353	0.654953	1.15024	8.01156	10.2185	1.27547	3.35311	0.351027	0.201935
YHR004C	NEM1	0.724135	0.629652	1.15006	16.3812	15.6809	0.957248	3.97093	-0.0630355	0.201703
YKR084C	HBS1	1.13664	0.98852	1.14984	11.1409	11.0227	0.989391	3.46241	-0.0153879	0.201427
YIL133C	RPL16A	0.476027	0.414009	1.1498	87.9089	81.0566	0.922052	6.34086	-0.117079	0.201381
YGR066C	YGR066C	0.888591	0.772933	1.14964	5.74236	14.6752	2.5556	3.8753	1.35366	0.201176
YDL178W	DLD2	0.879415	0.764973	1.1496	16.9061	17.6737	1.0454	4.14353	0.0640612	0.201135
YHR012W	VPS29	1.14011	0.991872	1.14945	14.3999	14.4998	1.00693	3.85796	0.00996736	0.200947
YGL027C	CWH41	0.954415	0.830503	1.1492	13.73	16.8697	1.22867	4.07636	0.2971	0.200631
YLR265C	NEJ1	0.962712	0.837748	1.14917	26.5936	21.7304	0.817128	4.44164	-0.291367	0.200588
YLR287C-A	RPS30A	0.760096	0.661443	1.14915	91.421	85.402	0.934161	6.4162	-0.0982564	0.200564
YFR032C-A	RPL29	0.300081	0.261133	1.14915	124	122.342	0.986623	6.93477	-0.0194293	0.200563
YOR071C	THI71	0.903293	0.786204	1.14893	12.9372	11.0031	0.850502	3.45984	-0.233614	0.20029
YDL180W	YDL180W	0.791921	0.689306	1.14887	13.894	22.085	1.58953	4.465	0.668604	0.200212
YER123W	YCK3	0.983599	0.856205	1.14879	18.2367	23.0765	1.26539	4.52836	0.339584	0.200115
YER122C	GLO3	0.983599	0.856205	1.14879	29.715	23.73	0.798589	4.56864	-0.324475	0.200115
YCL048W	SPS22	0.642644	0.559479	1.14865	5.71752	5.13844	0.898719	2.36133	-0.154058	0.199937
YKL185W	ASH1	0.626916	0.545874	1.14846	52.9069	26.1648	0.494543	4.70955	-1.01583	0.199703
YDR448W	ADA2	0.704214	0.613188	1.14845	23.3999	16.2667	0.695163	4.02385	-0.524576	0.199685
YOR152C	YOR152C	0.79538	0.692712	1.14821	17.4802	16.2368	0.928864	4.02119	-0.10646	0.199389
YFR032C-B	YFR032C-B	0.294295	0.256331	1.14811	103.476	78.4931	0.758567	6.29449	-0.398652	0.199257
YBR132C	AGP2	0.99945	0.870661	1.14792	19.5355	32.2482	1.65075	5.01115	0.72312	0.199024
YLR455W	YLR455W	0.64801	0.56455	1.14783	24.4808	15.0651	0.615386	3.91314	-0.700436	0.198914
YJL073W	JEM1	1.11613	0.972446	1.14775	14.4869	11.6718	0.805683	3.54496	-0.311716	0.198811
YJL074C	SMC3	1.11613	0.972446	1.14775	8.70929	4.5143	0.518332	2.1745	-0.948052	0.198811
YPR071W	YPR071W	0.923133	0.804404	1.1476	11.2681	13.5509	1.20259	3.76031	0.266147	0.198619
YJL036W	SNX4	1.1046	0.962583	1.14754	12.7907	12.026	0.940216	3.58809	-0.0889355	0.198546
YLR034C	SMF3	1.01376	0.883501	1.14743	27.7978	28.84	1.03749	4.85	0.0531031	0.198408
YPR101W	SNT309	0.742053	0.646779	1.14731	24.5909	34.0081	1.38296	5.08781	0.467756	0.19825
YER006W	NUG1	0.976109	0.850834	1.14724	18.6527	8.61109	0.461654	3.1062	-1.11512	0.198165
YML070W	DAK1	1.12062	0.97689	1.14713	14.1569	25.1491	1.77646	4.65244	0.829002	0.198023
YOR323C	PRO2	0.749688	0.653561	1.14708	15.0765	26.4217	1.75251	4.72365	0.809421	0.197968
YBR166C	TYR1	0.81087	0.707065	1.14681	15.7722	31.6142	2.00442	4.9825	1.00319	0.197628
YOL028C	YAP7	0.762504	0.664903	1.14679	15.3753	14.4169	0.937668	3.84969	-0.0928506	0.197601
YKR014C	YPT52	1.01449	0.884734	1.14666	21.8553	38.4829	1.76081	5.26615	0.816236	0.19744
YBR137W	YBR137W	0.886598	0.773226	1.14662	18.5309	20.3409	1.09768	4.34631	0.134451	0.197389
YPR072W	NOT5	0.93858	0.818582	1.14659	23.6063	21.1182	0.894598	4.40041	-0.160689	0.197352
YPR018W	RLF2	1.044	0.910547	1.14656	11.7214	7.61559	0.649718	2.92896	-0.622115	0.197313
YLR275W	SMD2	0.858414	0.748692	1.14655	13.4372	13.3409	0.992835	3.73779	-0.0103741	0.197302
YPL204W	HRR25	0.767271	0.669201	1.14655	31.6642	29.0518	0.917497	4.86055	-0.124225	0.197296
YKL079W	SMY1	0.654586	0.571005	1.14638	12.3605	12.9294	1.04603	3.69259	0.0649219	0.19708
YFL033C	RIM15	0.545052	0.475533	1.14619	11.8567	12.0745	1.01837	3.5939	0.0262644	0.196849
YFL031W	HAC1	0.545052	0.475533	1.14619	77.3632	79.8701	1.0324	6.31958	0.0460065	0.196849
YLR330W	CHS5	0.96679	0.843484	1.14619	20.4449	23.0465	1.12725	4.52648	0.172808	0.196841
YMR084W	YMR084W	0.893183	0.779323	1.1461	7.46691	10.436	1.39763	3.38349	0.482982	0.196733
YGR019W	UGA1	0.904952	0.789751	1.14587	26.6164	63.8992	2.40074	5.99773	1.26348	0.196444
YLR181C	VTA1	1.00989	0.881443	1.14572	20.6899	17.5753	0.849463	4.13547	-0.235377	0.196256
YLR182W	SWI6	1.00989	0.881443	1.14572	15.1176	11.7853	0.779573	3.55891	-0.359244	0.196256
YGR178C	PBP1	0.834431	0.728371	1.14561	23.5608	19.2468	0.816899	4.26655	-0.29177	0.19612
YER124C	DSE1	0.678427	0.592365	1.14528	90.5027	120.775	1.33449	6.91618	0.416294	0.195706
YER125W	RSP5	0.678427	0.592365	1.14528	25.6861	24.4845	0.953221	4.6138	-0.0691169	0.195706
YPL149W	ATG5	0.748022	0.653168	1.14522	18.4728	17.9432	0.971326	4.16536	-0.0419719	0.195625
YGR167W	CLC1	0.80946	0.706952	1.145	26.2891	27.0081	1.02735	4.75532	0.0389253	0.195348
YDL074C	BRE1	1.01286	0.884604	1.14499	28.3133	18.9162	0.6681	4.24155	-0.581863	0.195336
YDL073W	YDL073W	1.01286	0.884604	1.14499	12.9807	12.9318	0.996236	3.69286	-0.00543991	0.195336
YPR159W	KRE6	0.304675	0.266125	1.14486	29.8865	34.5902	1.15739	5.11229	0.210869	0.19517
YFR021W	ATG18	0.875101	0.764395	1.14483	16.3152	20.9604	1.28472	4.3896	0.361449	0.195132
YER085C	YER085C	0.838124	0.732139	1.14476	4.81057	7.50933	1.56101	2.90868	0.642478	0.195047
YER086W	ILV1	0.838124	0.732139	1.14476	21.3758	45.7218	2.13895	5.51481	1.09691	0.195047
YPR149W	NCE102	0.289419	0.252889	1.14445	148.479	150.066	1.01069	7.22946	0.0153466	0.19465
YMR168C	CEP3	1.08224	0.945859	1.14419	18.696	16.2231	0.867729	4.01998	-0.204683	0.194325
YBR055C	PRP6	0.450375	0.393624	1.14418	14.6108	13.217	0.904606	3.72433	-0.144639	0.194309
YBR056W	YBR056W	0.450375	0.393624	1.14418	12.443	23.2634	1.8696	4.53999	0.902726	0.194309
YCR003W	MRPL32	1.00616	0.879413	1.14413	17.6204	24.314	1.37987	4.60372	0.464537	0.19425
YCR002C	CDC10	1.00616	0.879413	1.14413	20.5959	16.249	0.78894	4.02227	-0.342013	0.19425
YGR119C	NUP57	0.88083	0.769884	1.14411	26.5345	30.5899	1.15283	4.93498	0.205184	0.194223
YDR229W	IVY1	0.979115	0.855803	1.14409	18.0267	18.2006	1.00965	4.18591	0.0138502	0.1942
YOR106W	VAM3	0.832489	0.727724	1.14396	13.9757	13.6998	0.980262	3.77609	-0.0287605	0.194039
YGR168C	YGR168C	0.959136	0.838525	1.14384	15.5555	13.174	0.846903	3.71962	-0.239731	0.193882
YLR271W	YLR271W	0.929339	0.812543	1.14374	10.5084	13.4758	1.28238	3.7523	0.358827	0.193761
YKL110C	KTI12	0.878493	0.768126	1.14368	22.6191	17.1812	0.759589	4.10276	-0.396709	0.193688
YGL153W	PEX14	0.899762	0.786816	1.14355	11.5408	17.7307	1.53635	4.14818	0.619507	0.193518
YGL154C	LYS5	0.899762	0.786816	1.14355	20.3517	31.0506	1.5257	4.95655	0.609471	0.193518
YHR113W	YHR113W	1.16095	1.0153	1.14345	17.3534	19.1635	1.10431	4.26029	0.143139	0.193398
YNL299W	TRF5	0.747601	0.653825	1.14343	18.8393	17.4061	0.923927	4.12152	-0.114149	0.193363
YNL056W	OCA2	0.781597	0.683561	1.14342	37.6252	60.1665	1.5991	5.91089	0.677261	0.193355
YER056C-A	RPL34A	0.54536	0.476974	1.14337	84.0789	77.3368	0.919812	6.27308	-0.120589	0.193298
YMR289W	ABZ2	0.993149	0.868726	1.14322	13.9263	12.6613	0.909162	3.66235	-0.13739	0.193109
YGL249W	ZIP2	0.761726	0.666349	1.14313	12.4283	14.8068	1.19138	3.88819	0.252637	0.192994
YIL164C	NIT1	1.04123	0.910997	1.14296	11.7679	44.1827	3.75452	5.46541	1.90863	0.192776
YHR204W	MNL1	1.13554	0.99354	1.14292	17.0736	15.3037	0.896337	3.93581	-0.157887	0.192729
YJL038C	YJL038C	0.979011	0.856654	1.14283	5.91669	4.50604	0.761581	2.17186	-0.39293	0.192611
YJL037W	YJL037W	0.979011	0.856654	1.14283	4.93932	4.50216	0.911493	2.17062	-0.133697	0.192611
YIL076W	SEC28	1.08359	0.948166	1.14283	18.0677	19.3326	1.07001	4.27297	0.0976272	0.192608
YPR128C	ANT1	1.43954	1.25965	1.14281	13.3366	21.5778	1.61793	4.43147	0.694151	0.192586
YBR214W	SDS24	1.17302	1.02649	1.14275	19.039	37.2296	1.95544	5.21838	0.967496	0.192511
YDR473C	PRP3	1.09944	0.962276	1.14254	11.0598	11.7504	1.06244	3.55464	0.0873861	0.192249
YGL197W	MDS3	0.876762	0.767679	1.1421	16.9169	19.965	1.18018	4.3194	0.239008	0.191684
YJL011C	RPC17	0.711271	0.622785	1.14208	13.9451	11.6235	0.833518	3.53898	-0.262714	0.191665
YNL014W	HEF3	0.573374	0.502044	1.14208	5.47931	4.95269	0.903889	2.30821	-0.145783	0.191663
YBR286W	APE3	0.697652	0.610934	1.14194	36.9267	56.5419	1.53119	5.82125	0.614656	0.191492
YLR310C	CDC25	0.768983	0.673435	1.14188	15.4024	13.5126	0.877302	3.75623	-0.188855	0.191413
YAL030W	SNC1	1.21118	1.06074	1.14183	19.6123	22.6775	1.15629	4.50319	0.209504	0.191351
YAL031C	GIP4	1.21118	1.06074	1.14183	13.3641	16.8771	1.26287	4.07699	0.336704	0.191351
YLL010C	PSR1	1.01067	0.88524	1.14169	23.673	19.7464	0.834131	4.30352	-0.261654	0.191174
YKR095W-A	PCC1	0.899008	0.787511	1.14158	21.1314	14.6506	0.69331	3.87289	-0.528428	0.191035
YMR071C	TVP18	0.80657	0.706627	1.14144	40.2182	27.2128	0.676629	4.76621	-0.563562	0.190852
YMR072W	ABF2	0.80657	0.706627	1.14144	53.4054	48.6371	0.910714	5.60398	-0.13493	0.190852
YBR257W	POP4	0.808384	0.708216	1.14144	16.9531	17.2239	1.01598	4.10634	0.0228652	0.19085
YJL045W	YJL045W	0.933211	0.817619	1.14138	6.76005	7.15245	1.05805	2.83844	0.0814046	0.190774
YOR008C-A	YOR008C-A	1.22865	1.07655	1.14128	40.9768	29.3143	0.715387	4.87353	-0.483204	0.190655
YNL168C	FMP41	1.19449	1.04684	1.14104	24.8865	14.7425	0.592391	3.88191	-0.755378	0.190351
YGL108C	YGL108C	0.918921	0.805383	1.14097	24.488	28.4312	1.16102	4.8294	0.215398	0.190266
YML069W	POB3	1.01512	0.889762	1.14089	19.8722	18.3899	0.925408	4.20084	-0.111838	0.190165
YAR028W	YAR028W	1.16181	1.01838	1.14084	11.121	10.6286	0.955719	3.40988	-0.0653413	0.190091
YDR351W	SBE2	0.915637	0.802633	1.14079	19.4359	18.1956	0.936187	4.18552	-0.0951319	0.190035
YDR350C	TCM10	0.915637	0.802633	1.14079	16.8759	17.1706	1.01746	4.10187	0.024975	0.190035
YOR286W	FMP31	1.10851	0.971784	1.1407	23.0113	22.5409	0.979558	4.49447	-0.0297975	0.189921
YLL018C	DPS1	1.06924	0.937688	1.14029	21.1052	40.3514	1.91192	5.33455	0.935018	0.189407
YKL033W	YKL033W	0.806739	0.70754	1.1402	10.1479	11.8883	1.1715	3.57148	0.22836	0.189289
YBR127C	VMA2	1.08695	0.953369	1.14011	34.1233	36.2236	1.06155	5.17886	0.0861734	0.189176
YLR004C	THI73	1.21865	1.06899	1.14001	10.1152	9.80043	0.968885	3.29285	-0.0456031	0.189043
YLR005W	SSL1	1.21865	1.06899	1.14001	11.7427	10.7516	0.915598	3.42648	-0.127214	0.189043
YLR092W	SUL2	1.05926	0.929295	1.13986	10.5358	12.8261	1.21738	3.68101	0.283779	0.188853
YMR204C	INP1	0.603925	0.529853	1.1398	14.2129	16.0927	1.13226	4.00834	0.179206	0.188776
YBR148W	YSW1	0.746607	0.655122	1.13965	6.15012	24.2673	3.94583	4.60094	1.98033	0.188586
YDR027C	VPS54	0.947634	0.831578	1.13956	17.5163	18.0313	1.0294	4.17243	0.0418018	0.188478
YKR053C	YSR3	1.11191	0.976024	1.13923	31.9718	30.7005	0.960238	4.94019	-0.0585368	0.188053
YPR111W	DBF20	0.886277	0.777999	1.13918	11.2572	19.0808	1.69498	4.25405	0.761272	0.187991
YMR083W	ADH3	0.778534	0.68349	1.13906	28.0056	31.5189	1.12545	4.97815	0.170502	0.187838
YFR009W	GCN20	0.725207	0.636847	1.13875	20.416	16.703	0.818131	4.06203	-0.289596	0.187446
YHR073W	OSH3	1.16643	1.02436	1.13868	17.4539	14.0557	0.805302	3.81308	-0.312399	0.187366
YOR097C	YOR097C	0.936984	0.822885	1.13866	26.5972	28.5411	1.07309	4.83497	0.101765	0.187335
YMR315W	YMR315W	0.827825	0.727041	1.13862	22.2181	42.942	1.93275	5.42432	0.950653	0.187289
YLR130C	ZRT2	0.699917	0.614773	1.1385	46.8217	51.4222	1.09825	5.68432	0.135213	0.187131
YER087W	YER087W	0.834541	0.733031	1.13848	13.9259	15.1835	1.09031	3.92443	0.124734	0.18711
YGR145W	ENP2	0.800526	0.703238	1.13834	11.0332	5.81439	0.526992	2.53963	-0.924147	0.186936
YLR023C	IZH3	0.690235	0.606364	1.13832	23.1806	29.1517	1.25759	4.86551	0.330659	0.186905
YGL098W	USE1	0.630559	0.554019	1.13815	16.3464	16.2043	0.991306	4.0183	-0.0125976	0.186695
YLR340W	RPP0	0.704026	0.618641	1.13802	156.356	127.169	0.813329	6.9906	-0.29809	0.186528
YBL092W	RPL32	0.484707	0.425957	1.13793	125.996	128.442	1.01941	7.00497	0.027738	0.186407
YBL093C	ROX3	0.484707	0.425957	1.13793	20.5602	23.1796	1.1274	4.53479	0.173002	0.186407
YHR111W	UBA4	1.20819	1.0618	1.13787	20.7516	18.1999	0.877037	4.18586	-0.18929	0.186336
YHR008C	SOD2	0.911808	0.801385	1.13779	35.7647	38.7478	1.08341	5.27604	0.115577	0.186234
YBR011C	IPP1	1.12016	0.984545	1.13774	42.6189	38.6685	0.907309	5.27309	-0.140334	0.186174
YGR070W	ROM1	0.6623	0.582167	1.13765	15.2065	19.5002	1.28236	4.28542	0.3588	0.186053
YDR308C	SRB7	0.856472	0.752896	1.13757	20.3639	18.8179	0.924083	4.23404	-0.113906	0.185956
YLL026W	HSP104	0.723588	0.636124	1.13749	51.1169	72.6038	1.42035	6.18197	0.506245	0.185859
YNL008C	ASI3	0.799535	0.702905	1.13747	17.9641	20.2747	1.12863	4.34161	0.174569	0.185833
YBR246W	YBR246W	0.896589	0.788246	1.13745	15.5174	10.7823	0.694852	3.43059	-0.525223	0.185801
YBR245C	ISW1	0.896589	0.788246	1.13745	13.4397	9.40003	0.69942	3.23267	-0.515768	0.185801
YLR168C	YLR168C	0.809471	0.711752	1.13729	51.7025	53.9815	1.04408	5.75439	0.0622317	0.185605
YGL073W	HSF1	1.18093	1.03842	1.13724	22.5136	19.6775	0.874024	4.29847	-0.194256	0.185543
YHR100C	YHR100C	0.93291	0.820336	1.13723	20.8166	18.4791	0.88771	4.20782	-0.171839	0.185523
YHR208W	BAT1	0.964355	0.848021	1.13718	39.4662	37.1642	0.941671	5.21584	-0.0867043	0.185464
YPR145C-A	YPR145C-A	1.02832	0.904305	1.13714	13.4099	37.774	2.81687	5.23932	1.49409	0.185407
YDR353W	TRR1	0.887577	0.780567	1.13709	45.2429	66.2199	1.46365	6.04919	0.549574	0.18535
YIL148W	RPL40A	0.474756	0.417579	1.13693	110.217	95.7689	0.868911	6.58148	-0.20272	0.185139
YIL149C	MLP2	0.474756	0.417579	1.13693	14.3007	12.623	0.882684	3.65799	-0.180031	0.185139
YBR089C-A	NHP6B	0.871216	0.766295	1.13692	41.537	26.3721	0.634907	4.72094	-0.655382	0.18513
YOR370C	MRS6	0.685472	0.602964	1.13684	33.6714	33.2783	0.988327	5.05651	-0.0169399	0.185025
YDR446W	ECM11	1.01222	0.890402	1.13681	16.9948	14.9876	0.881893	3.9057	-0.181324	0.184995
YDR063W	YDR063W	0.65017	0.571957	1.13675	32.9771	50.563	1.53328	5.66001	0.616619	0.18491
YGL065C	ALG2	0.928827	0.817145	1.13667	17.201	18.1906	1.05754	4.18513	0.0807068	0.184818
YLR077W	FMP25	0.874456	0.76932	1.13666	17.194	19.2874	1.12175	4.26958	0.16575	0.184801
YDL044C	MTF2	0.966082	0.850028	1.13653	12.5982	13.6707	1.08513	3.77302	0.117874	0.184635
YML086C	ALO1	0.937263	0.824791	1.13636	16.2567	13.4678	0.828444	3.75144	-0.271524	0.184425
YJR061W	YJR061W	0.724752	0.637792	1.13634	16.2885	16.6028	1.0193	4.05336	0.0275774	0.1844
YML028W	TSA1	1.06725	0.93926	1.13626	159.983	129.868	0.811759	7.0209	-0.300877	0.184296
YGL129C	RSM23	1.1196	0.985363	1.13623	14.7947	18.3484	1.2402	4.19758	0.310571	0.184259
YDR541C	YDR541C	0.839244	0.738661	1.13617	10.8891	10.4956	0.963857	3.39171	-0.0531087	0.184178
YGR169C-A	YGR169C-A	0.659729	0.580772	1.13595	47.919	30.8258	0.643289	4.94607	-0.63646	0.183902
YGR170W	PSD2	0.659729	0.580772	1.13595	15.0033	12.9405	0.862513	3.69383	-0.213382	0.183902
YPR041W	TIF5	0.792049	0.697302	1.13588	35.4839	22.4279	0.632057	4.48722	-0.661873	0.183806
YML071C	COG8	0.522287	0.459858	1.13576	17.3016	15.1462	0.875422	3.92089	-0.191949	0.183653
YPR021C	AGC1	0.740628	0.652166	1.13564	10.5556	15.1444	1.43473	3.92072	0.520784	0.183511
YML050W	YML050W	1.17897	1.03815	1.13564	13.2835	10.3664	0.780397	3.37384	-0.357721	0.18351
YBR016W	YBR016W	1.2024	1.05885	1.13558	23.0952	34.4618	1.49217	5.10693	0.577408	0.183423
YOR056C	NOB1	0.949846	0.836525	1.13547	22.9752	18.0999	0.787802	4.17791	-0.344096	0.183284
YDR337W	MRPS28	1.12112	0.987366	1.13546	18.2539	16.133	0.88381	4.01194	-0.178192	0.183279
YMR110C	HFD1	0.58302	0.513466	1.13546	18.7197	22.2043	1.18615	4.47277	0.246282	0.183278
YGR087C	PDC6	0.981706	0.864611	1.13543	8.48479	9.17042	1.08081	3.19699	0.112109	0.183239
YDL174C	DLD1	1.18567	1.04433	1.13533	19.2189	22.8391	1.18837	4.51344	0.24898	0.183118
YOR184W	SER1	0.540311	0.475934	1.13526	24.0756	70.6724	2.93544	6.14308	1.55358	0.183028
YOR182C	RPS30B	0.540311	0.475934	1.13526	99.0014	93.0361	0.939745	6.53972	-0.0896583	0.183028
YER065C	ICL1	0.757896	0.667605	1.13525	35.4825	30.1622	0.850057	4.91467	-0.234368	0.183005
YML074C	FPR3	1.02939	0.906778	1.13522	24.7179	17.227	0.696947	4.1066	-0.520879	0.182975
YFR010W	UBP6	0.83867	0.738807	1.13517	22.2732	23.5249	1.05619	4.55611	0.0788738	0.182905
YDR414C	ERD1	0.871411	0.767658	1.13516	17.0486	16.6165	0.974654	4.05454	-0.0370373	0.182891
YPL253C	VIK1	0.70769	0.623443	1.13513	21.7267	14.7777	0.680162	3.88535	-0.556049	0.182859
YAR019C	CDC15	1.60334	1.41248	1.13512	10.0377	9.67385	0.963756	3.27409	-0.0532595	0.182846
YJL111W	CCT7	0.880422	0.775844	1.13479	30.1103	18.5282	0.615345	4.21165	-0.700534	0.182428
YNL157W	IGO1	1.08831	0.959094	1.13473	31.4803	36.4021	1.15634	5.18595	0.20957	0.182346
YDL040C	NAT1	1.12683	0.993074	1.13469	16.4098	14.4191	0.878685	3.8499	-0.186583	0.182297
YFL017C	GNA1	0.678444	0.59798	1.13456	30.8569	25.2659	0.818807	4.65912	-0.288405	0.182132
YGR193C	PDX1	0.956337	0.842917	1.13456	25.1455	25.6232	1.019	4.67938	0.0271476	0.182127
YJL068C	YJL068C	1.11457	0.982471	1.13446	13.7751	18.6537	1.35416	4.22139	0.437402	0.182001
YBR255W	YBR255W	0.953878	0.840949	1.13429	9.04798	18.4821	2.04268	4.20806	1.03046	0.181787
YBR254C	TRS20	0.953878	0.840949	1.13429	23.08	26.4718	1.14696	4.72639	0.197815	0.181787
YNL113W	RPC19	0.838911	0.739643	1.13421	24.9655	18.1676	0.727707	4.1833	-0.458571	0.181687
YOR049C	RSB1	0.441878	0.389615	1.13414	12.9404	9.59062	0.741139	3.26162	-0.432184	0.1816
YEL052W	AFG1	1.10839	0.977323	1.1341	13.3158	18.1377	1.36212	4.18092	0.445856	0.181552
YPL234C	TFP3	0.979457	0.863725	1.13399	26.9677	34.9211	1.29492	5.12603	0.372865	0.18141
YDL137W	ARF2	0.665596	0.587011	1.13387	66.7777	54.4105	0.8148	5.76581	-0.295482	0.181259
YIR007W	YIR007W	0.639083	0.563672	1.13379	10.6443	13.6281	1.28032	3.76852	0.356508	0.181148
YOR172W	YRM1	1.16189	1.02481	1.13376	14.9981	16.1325	1.07564	4.0119	0.105191	0.181114
YOR171C	LCB4	1.16189	1.02481	1.13376	12.8741	13.7788	1.07027	3.78438	0.0979807	0.181114
YJL030W	MAD2	0.980911	0.865194	1.13375	19.3709	15.1816	0.783731	3.92425	-0.35157	0.181098
YJL031C	BET4	0.980911	0.865194	1.13375	11.6201	10.9667	0.943769	3.45505	-0.0834946	0.181098
YLR369W	SSQ1	0.844819	0.745201	1.13368	11.9531	18.0151	1.50715	4.17113	0.591824	0.181013
YKL073W	LHS1	0.936839	0.826397	1.13364	10.8919	8.97106	0.823647	3.16528	-0.279902	0.180966
YKL074C	MUD2	0.936839	0.826397	1.13364	12.4637	10.6658	0.855752	3.41492	-0.224736	0.180966
YKR088C	TVP38	0.924918	0.815977	1.13351	14.9165	16.1465	1.08246	4.01315	0.114317	0.180797
YNL239W	LAP3	1.07991	0.952817	1.13339	24.8747	41.0961	1.65212	5.36093	0.724322	0.180644
YJL162C	JJJ2	0.944855	0.83367	1.13337	9.15866	7.3266	0.799964	2.87314	-0.321992	0.180617
YER066W	YER066W	1.22202	1.07822	1.13337	9.49133	12.3283	1.2989	3.6239	0.37729	0.180614
YJL049W	YJL049W	0.914341	0.806765	1.13334	14.2226	17.6102	1.23819	4.13834	0.30823	0.180585
YCR031C	RPS14A	0.549083	0.484483	1.13334	114.59	92.0303	0.803124	6.52404	-0.316305	0.180577
YLR083C	EMP70	0.665499	0.587355	1.13304	18.4052	11.1821	0.607551	3.48312	-0.718924	0.180202
YDL020C	RPN4	0.736092	0.649701	1.13297	43.9034	36.3467	0.827879	5.18375	-0.272508	0.180109
YIL134C-A	YIL134C-A	1.01638	0.897225	1.13281	17.122	17.3432	1.01292	4.1163	0.0185201	0.179905
YGL080W	FMP37	0.944564	0.834055	1.1325	17.6012	17.0874	0.970806	4.09486	-0.0427458	0.179506
YOL023W	IFM1	0.923216	0.815353	1.13229	12.8999	11.0521	0.856759	3.46624	-0.223038	0.179245
YGL006W	PMC1	0.629157	0.555696	1.1322	15.1641	18.8571	1.24353	4.23703	0.314446	0.179124
YNL258C	DSL1	0.772655	0.682441	1.13219	15.7631	14.6202	0.927497	3.86989	-0.108585	0.17912
YOL068C	HST1	1.22856	1.08515	1.13216	35.0451	28.9137	0.825041	4.85368	-0.277462	0.179082
YCR024C	SLM5	0.752926	0.665086	1.13207	16.3377	25.6634	1.57081	4.68164	0.651505	0.178969
YLR177W	YLR177W	1.0068	0.889402	1.132	17.8512	34.7881	1.94878	5.12052	0.962574	0.178874
YDR141C	DOP1	0.888062	0.784608	1.13185	16.3576	15.1574	0.926629	3.92195	-0.109936	0.178689
YIL074C	SER33	0.809554	0.715389	1.13163	17.7854	22.2629	1.25175	4.47657	0.32395	0.178398
YEL012W	UBC8	0.823326	0.727608	1.13155	14.0357	15.524	1.10604	3.95643	0.145402	0.178304
YPL249C	GYP5	0.933218	0.824742	1.13153	18.7487	18.2295	0.972306	4.1882	-0.0405173	0.178272
YGR165W	MRPS35	0.697219	0.616192	1.1315	15.5139	15.2168	0.980853	3.92759	-0.0278919	0.178233
YGR240C	PFK1	0.396329	0.350343	1.13126	48.671	36.5247	0.75044	5.1908	-0.414191	0.17793
YBL087C	RPL23A	0.465476	0.411482	1.13122	70.3415	56.0215	0.796422	5.80791	-0.328395	0.177879
YIL119C	RPI1	0.228166	0.201701	1.13121	51.9391	51.0655	0.98318	5.67428	-0.0244721	0.177867
YJR143C	PMT4	1.1929	1.05453	1.13121	19.1207	14.1355	0.73928	3.82126	-0.435808	0.177862
YJR144W	MGM101	1.1929	1.05453	1.13121	21.9855	18.5413	0.843342	4.21267	-0.24581	0.177862
YKR011C	YKR011C	0.857599	0.758276	1.13099	26.556	24.6388	0.927808	4.62286	-0.108102	0.17758
YPL016W	SWI1	0.606133	0.535961	1.13093	13.1522	9.21096	0.700335	3.20335	-0.513883	0.177507
YPL017C	IRC15	0.606133	0.535961	1.13093	14.7443	18.4035	1.24818	4.20191	0.319824	0.177507
YHL034C	SBP1	0.777203	0.68729	1.13082	27.2449	36.8715	1.35333	5.20443	0.436518	0.177372
YOR129C	YOR129C	1.03218	0.912799	1.13078	10.0544	10.1443	1.00894	3.3426	0.0128389	0.177325
YNL279W	PRM1	0.66031	0.583948	1.13077	12.5038	29.431	2.35375	4.87926	1.23496	0.177304
YNL280C	ERG24	0.66031	0.583948	1.13077	26.0978	18.1001	0.693549	4.17793	-0.52793	0.177304
YKR074W	YKR074W	0.559681	0.494962	1.13076	24.1276	18.9912	0.787115	4.24726	-0.345353	0.177288
YLR431C	ATG23	1.08108	0.956074	1.13075	9.13514	8.68173	0.950367	3.11798	-0.0734441	0.177284
YCR053W	THR4	1.01104	0.894172	1.1307	33.3396	54.0419	1.62095	5.75601	0.696843	0.17722
YCL004W	PGS1	0.918628	0.81244	1.1307	16.2503	13.3544	0.821793	3.73924	-0.283154	0.177219
YDR503C	LPP1	0.850461	0.752164	1.13069	20.4035	11.9229	0.584355	3.57566	-0.775083	0.177198
YPR135W	CTF4	0.903293	0.79914	1.13033	14.8612	10.7511	0.72343	3.42641	-0.467075	0.176746
YPR058W	YMC1	1.12476	0.995117	1.13028	12.3361	21.255	1.72299	4.40973	0.784914	0.176677
YHR003C	YHR003C	0.780447	0.690497	1.13027	18.8606	16.7014	0.885517	4.06189	-0.175408	0.176665
YOR354C	MSC6	0.895377	0.792205	1.13023	21.1506	17.4506	0.825067	4.12521	-0.277418	0.176621
YLR239C	LIP2	1.43271	1.26772	1.13015	9.7788	15.3433	1.56904	3.93954	0.649879	0.176511
YLR240W	VPS34	1.43271	1.26772	1.13015	10.2226	15.9791	1.5631	3.99811	0.644414	0.176511
YKL114C	APN1	0.873193	0.772719	1.13003	17.3083	21.0703	1.21735	4.39714	0.283743	0.176356
YOL129W	VPS68	0.869449	0.769433	1.12999	21.374	30.7257	1.43753	4.94138	0.523593	0.176306
YGR205W	YGR205W	0.780674	0.690888	1.12996	20.8209	19.9424	0.957805	4.31777	-0.0621965	0.176268
YIL140W	AXL2	0.759247	0.672014	1.12981	15.9487	15.4973	0.971698	3.95394	-0.0414199	0.176077
YIL135C	VHS2	1.05859	0.937004	1.12976	17.1473	24.2806	1.416	4.60173	0.501821	0.176012
YLR003C	YLR003C	1.09972	0.973439	1.12973	17.1156	8.13441	0.475264	3.02404	-1.0732	0.175978
YGL071W	AFT1	0.830255	0.734971	1.12964	21.1214	20.9299	0.990933	4.38749	-0.0131401	0.175867
YOR307C	SLY41	0.608137	0.53839	1.12955	22.6262	16.8527	0.744831	4.0749	-0.425016	0.175745
YCL008C	STP22	1.15839	1.02557	1.1295	15.8042	34.0862	2.15678	5.09112	1.10888	0.175689
YCL005W-A	VMA9	1.15839	1.02557	1.1295	78.2392	51.0719	0.652766	5.67446	-0.615361	0.175689
YIL075C	RPN2	0.806501	0.714051	1.12947	30.2721	21.6125	0.713942	4.4338	-0.48612	0.175648
YER114C	BOI2	0.76369	0.676187	1.12941	13.8363	10.1623	0.734464	3.34515	-0.445236	0.175564
YOR380W	RDR1	1.22217	1.08214	1.1294	9.44072	9.50738	1.00706	3.24905	0.0101505	0.175551
YHR168W	MTG2	0.80717	0.714718	1.12935	12.1202	9.06869	0.748231	3.18089	-0.418444	0.175498
YNL183C	NPR1	1.00457	0.889527	1.12933	12.8561	22.6177	1.7593	4.49938	0.814998	0.175463
YOR107W	RGS2	0.598425	0.529898	1.12932	23.2153	43.2997	1.86513	5.43628	0.899277	0.175455
YIL009C-A	EST3	0.769034	0.680977	1.12931	20.1739	22.6569	1.12308	4.50188	0.167455	0.175441
YLR154C	RNH203	0.636388	0.563577	1.12919	25.2931	9.15853	0.362096	3.19512	-1.46556	0.175294
YBR026C	ETR1	0.828257	0.733571	1.12908	11.3315	17.4045	1.53594	4.12139	0.619118	0.175141
YMR038C	CCS1	0.585287	0.518398	1.12903	35.3884	32.3219	0.913347	5.01444	-0.130766	0.175083
YHR028C	DAP2	0.727205	0.644144	1.12895	26.7073	31.4002	1.17572	4.9727	0.233542	0.174978
YDR302W	GPI11	1.012	0.896502	1.12883	12.1075	10.0702	0.831733	3.33202	-0.265808	0.174834
YIL088C	AVT7	1.3145	1.16462	1.1287	12.1076	12.5447	1.0361	3.649	0.0511627	0.174661
YJL194W	CDC6	0.495963	0.439464	1.12856	30.4388	17.8266	0.585654	4.15596	-0.77188	0.174488
YML065W	ORC1	1.04677	0.927567	1.12851	11.1874	6.45046	0.576581	2.6894	-0.794405	0.174424
YML066C	SMA2	1.04677	0.927567	1.12851	6.10788	5.70459	0.933972	2.51212	-0.0985493	0.174424
YLR175W	CBF5	0.716722	0.635141	1.12844	38.988	21.8872	0.561382	4.45201	-0.832945	0.174335
YOL004W	SIN3	1.00414	0.889849	1.12844	26.6264	19.4629	0.730964	4.28266	-0.452128	0.174327
YGR100W	MDR1	1.042	0.923436	1.12839	11.3846	14.3853	1.26357	3.84653	0.33751	0.174268
YGL191W	COX13	0.932828	0.826748	1.12831	20.9442	27.6751	1.32137	4.79052	0.402036	0.174165
YJR043C	POL32	0.965032	0.855344	1.12824	13.1065	9.42222	0.718897	3.23607	-0.476144	0.174071
YOR125C	CAT5	0.899054	0.796897	1.12819	11.1744	15.203	1.36052	3.92629	0.444157	0.174015
YOR124C	UBP2	0.837383	0.742412	1.12792	13.3843	16.8532	1.25918	4.07495	0.332481	0.173666
YMR081C	ISF1	0.678106	0.601201	1.12792	12.3235	14.4493	1.1725	3.85293	0.229591	0.173663
YKR061W	KTR2	0.660855	0.585917	1.1279	35.0953	30.7805	0.877054	4.94394	-0.189263	0.173638
YOR285W	YOR285W	0.892663	0.791488	1.12783	35.3541	48.2655	1.3652	5.59292	0.449112	0.17355
YBR163W	DEM1	0.867849	0.769494	1.12782	16.698	16.3559	0.979513	4.03174	-0.0298641	0.173533
YOL071W	EMI5	1.08167	0.959111	1.12779	21.9463	27.2233	1.24045	4.76677	0.310862	0.173493
YOL136C	PFK27	0.638447	0.566154	1.12769	22.4346	17.7	0.788961	4.14568	-0.341973	0.173371
YNL085W	MKT1	0.963969	0.854922	1.12755	18.1463	15.6819	0.864192	3.97103	-0.210576	0.173194
YLR215C	CDC123	0.90111	0.799204	1.12751	17.7732	12.8057	0.720508	3.67872	-0.472914	0.173138
YLR335W	NUP2	0.783371	0.694935	1.12726	21.9001	14.7957	0.675597	3.8871	-0.565765	0.172818
YBR203W	COS111	0.296633	0.263195	1.12705	8.73706	9.10275	1.04185	3.1863	0.0591544	0.172545
YGL251C	HFM1	0.905468	0.803452	1.12697	10.7518	13.2838	1.23551	3.7316	0.305101	0.172452
YJL010C	NOP9	0.91606	0.812859	1.12696	13.5276	7.63206	0.564183	2.93207	-0.825766	0.172437
YBR297W	MAL33	0.814071	0.722435	1.12684	3.9579	6.00724	1.51778	2.5867	0.601966	0.172288
YKL069W	YKL069W	0.884685	0.785106	1.12684	30.5529	22.4103	0.733492	4.48609	-0.447147	0.172277
YEL027W	CUP5	0.432202	0.383637	1.12659	67.2423	52.451	0.780031	5.7129	-0.358397	0.171967
YOL116W	MSN1	0.980201	0.870075	1.12657	15.6926	14.6297	0.932269	3.87083	-0.101182	0.171939
YEL024W	RIP1	0.951482	0.844649	1.12648	21.3687	18.2043	0.851916	4.18621	-0.231217	0.171824
YML106W	URA5	0.687068	0.609964	1.12641	29.0815	19.3338	0.664816	4.27306	-0.588973	0.17173
YML107C	PML39	0.687068	0.609964	1.12641	23.9473	18.2823	0.763438	4.19238	-0.389417	0.17173
YBR002C	RER2	1.10523	0.981377	1.1262	31.4479	22.5419	0.716802	4.49454	-0.480353	0.171463
YBR003W	COQ1	1.10523	0.981377	1.1262	20.096	21.6517	1.07741	4.43641	0.107571	0.171463
YJL196C	ELO1	0.53807	0.477792	1.12616	29.0499	30.2028	1.03969	4.91661	0.0561491	0.171413
YDR119W-A	YDR119W-A	0.711134	0.631511	1.12608	12.9868	38.0721	2.9316	5.25066	1.55169	0.171313
YKL084W	HOT13	0.643507	0.571594	1.12581	29.0058	20.0232	0.690318	4.3236	-0.534667	0.170965
YHR032W	YHR032W	0.846421	0.751926	1.12567	15.1294	11.9855	0.792199	3.58322	-0.336066	0.170785
YHR031C	RRM3	0.846421	0.751926	1.12567	12.5084	12.3801	0.989748	3.62995	-0.0148661	0.170785
YKL028W	TFA1	0.809365	0.719086	1.12555	26.5339	18.9064	0.712536	4.2408	-0.488966	0.170626
YOL006C	TOP1	0.591119	0.52525	1.12541	26.8123	15.8081	0.589584	3.9826	-0.76223	0.170445
YOR057W	SGT1	0.955608	0.849125	1.1254	15.1595	15.2885	1.00851	3.93437	0.0122231	0.170442
YKL204W	EAP1	0.720488	0.640225	1.12537	20.5941	17.5141	0.85044	4.13044	-0.233719	0.170395
YOL117W	RRI2	1.20003	1.06638	1.12533	10.5526	15.6407	1.48217	3.96723	0.56771	0.170343
YBL002W	HTB2	0.475892	0.422911	1.12528	168.124	147.86	0.879468	7.20809	-0.185298	0.170281
YNL117W	MLS1	0.667966	0.593718	1.12506	16.0721	23.0648	1.43508	4.52762	0.521133	0.169996
YNL118C	DCP2	0.667966	0.593718	1.12506	29.6832	25.2251	0.849811	4.65679	-0.234787	0.169996
YDL215C	GDH2	0.90549	0.804881	1.125	20.7222	24.5349	1.18399	4.61676	0.243658	0.169923
YNL051W	COG5	0.748113	0.664999	1.12498	13.4785	12.8883	0.956214	3.68799	-0.0645943	0.169905
YLR151C	PCD1	0.771162	0.685547	1.12489	13.9256	21.2617	1.52681	4.41018	0.610521	0.169778
YNL094W	APP1	1.21634	1.08137	1.12482	15.8301	15.5886	0.984742	3.96242	-0.0221819	0.16969
YNL095C	YNL095C	1.21634	1.08137	1.12482	20.7147	23.4176	1.13048	4.54952	0.17694	0.16969
YKL049C	CSE4	0.695352	0.618193	1.12481	11.4329	7.40889	0.648031	2.88926	-0.625866	0.169687
YHR139C	SPS100	1.03361	0.918934	1.12479	7.87624	8.63063	1.09578	3.10947	0.13196	0.169657
YBR048W	RPS11B	0.527143	0.468708	1.12467	66.165	61.3782	0.927654	5.93965	-0.108342	0.169505
YLR328W	NMA1	0.622257	0.553337	1.12455	16.8981	15.8992	0.940887	3.99088	-0.0879061	0.169354
YJR104C	SOD1	0.856273	0.761484	1.12448	133.058	94.3265	0.708914	6.55959	-0.496317	0.169257
YKL189W	HYM1	0.780646	0.694333	1.12431	13.9681	20.1675	1.44383	4.33396	0.529897	0.16904
YMR192W	GYL1	0.751375	0.668508	1.12396	12.717	11.5775	0.910399	3.53326	-0.135429	0.168587
YEL006W	YEA6	0.651379	0.579578	1.12388	22.9735	20.1527	0.877213	4.3329	-0.189001	0.168493
YPL146C	NOP53	0.748395	0.665908	1.12387	14.7563	8.28519	0.56147	3.05053	-0.83272	0.168478
YFR011C	YFR011C	0.56526	0.50296	1.12387	16.8465	20.3029	1.20517	4.34361	0.269235	0.168471
YER033C	ZRG8	0.980164	0.872157	1.12384	10.1056	12.6004	1.24687	3.6554	0.318315	0.168436
YML100W-A	YML100W-A	0.674466	0.600163	1.1238	7.38776	9.45466	1.27977	3.24102	0.355888	0.168391
YLR289W	GUF1	1.09255	0.972223	1.12377	8.68747	11.1333	1.28154	3.47682	0.35788	0.168343
YLR288C	MEC3	1.09255	0.972223	1.12377	10.5305	10.0004	0.949661	3.32198	-0.0745152	0.168343
YDL075W	RPL31A	0.416331	0.370503	1.12369	97.2543	89.502	0.920288	6.48385	-0.119843	0.168247
YDL076C	RXT3	0.416331	0.370503	1.12369	19.1195	25.7331	1.34591	4.68556	0.428582	0.168247
YEL029C	BUD16	1.15582	1.02866	1.12361	13.9859	17.1275	1.22463	4.09824	0.292342	0.168147
YNR074C	AIF1	0.901486	0.802323	1.12359	10.5952	14.189	1.33919	3.8267	0.421362	0.168122
YDR335W	MSN5	0.978976	0.871298	1.12358	17.1951	15.9175	0.925699	3.99254	-0.111385	0.168108
YLR297W	YLR297W	0.556465	0.495265	1.12357	27.3635	26.903	0.983171	4.7497	-0.0244854	0.168091
YPL069C	BTS1	1.09356	0.973444	1.12339	18.5845	17.092	0.919694	4.09525	-0.120773	0.167864
YBR013C	YBR013C	0.532022	0.473689	1.12315	13.7918	24.8117	1.79901	4.63295	0.847206	0.167545
YOR312C	RPL20B	0.433976	0.386426	1.12305	86.6594	78.9418	0.910944	6.30272	-0.134566	0.167425
YDR458C	HEH2	0.852433	0.759073	1.12299	15.7826	13.4917	0.854849	3.754	-0.226259	0.167347
YNL267W	PIK1	0.641999	0.571689	1.12299	18.8388	17.4115	0.924236	4.12197	-0.113667	0.167339
YOL120C	RPL18A	0.480923	0.428255	1.12298	145.147	120.542	0.830477	6.91339	-0.267988	0.167335
YJR090C	GRR1	0.690459	0.614863	1.12295	16.3627	15.3958	0.940904	3.94446	-0.087881	0.16729
YOR189W	IES4	0.810001	0.721319	1.12295	15.5096	15.095	0.973268	3.916	-0.0390905	0.167288
YGR040W	KSS1	0.96196	0.856837	1.12269	32.5909	23.3311	0.715878	4.54418	-0.482215	0.166956
YKL088W	YKL088W	1.0715	0.954452	1.12264	15.9392	20.8581	1.3086	4.38254	0.38803	0.166892
YEL002C	WBP1	0.754343	0.672005	1.12253	22.904	19.9515	0.871094	4.31843	-0.1991	0.16675
YDR223W	CRF1	1.07758	0.960031	1.12245	11.259	14.0023	1.24365	3.80759	0.314575	0.166647
YMR274C	RCE1	0.689398	0.614213	1.12241	12.0595	8.16799	0.67731	3.02998	-0.562111	0.166598
YOR154W	SLP1	0.542756	0.483598	1.12233	12.1969	9.3348	0.765342	3.22262	-0.385824	0.166496
YMR279C	YMR279C	0.778887	0.694016	1.12229	14.801	16.4639	1.11235	4.04124	0.153616	0.166445
YIL118W	RHO3	0.476877	0.424934	1.12224	31.8298	30.6901	0.964195	4.9397	-0.0526025	0.166378
YFR012W	YFR012W	0.571319	0.509166	1.12207	4.47652	5.43595	1.21433	2.44253	0.280155	0.16616
YNL142W	MEP2	0.895893	0.798491	1.12198	12.0783	10.5221	0.871153	3.39535	-0.199003	0.166051
YOR018W	ROD1	0.785038	0.69972	1.12193	17.7312	18.0282	1.01675	4.17218	0.0239673	0.165985
YLR262C	YPT6	0.898309	0.800695	1.12191	14.1318	14.9873	1.06054	3.90567	0.0848011	0.16596
YER100W	UBC6	1.29998	1.15874	1.12189	15.9125	13.7241	0.862475	3.77864	-0.213445	0.165927
YHR047C	AAP1	0.681236	0.607226	1.12188	9.77844	23.6694	2.42057	4.56495	1.27535	0.165923
YBR053C	YBR053C	0.923403	0.823128	1.12182	14.2425	22.0439	1.54776	4.46231	0.63018	0.165843
YPR120C	CLB5	0.682061	0.608001	1.12181	21.5371	6.05437	0.281114	2.59798	-1.83077	0.165825
YPL196W	OXR1	0.866891	0.772779	1.12178	19.4186	20.5282	1.05714	4.35953	0.0801656	0.165794
YNL050C	YNL050C	0.598332	0.533405	1.12172	15.0092	13.6824	0.911597	3.77425	-0.133531	0.165714
YIL045W	PIG2	0.927818	0.827152	1.1217	9.92442	15.8427	1.59634	3.98575	0.674767	0.165689
YDL027C	YDL027C	0.757646	0.675446	1.1217	15.522	19.0716	1.22868	4.25336	0.297115	0.165684
YAL063C	FLO9	0.950592	0.847466	1.12169	7.14874	6.25415	0.874861	2.64481	-0.192874	0.165671
YLR356W	YLR356W	1.05137	0.937439	1.12153	11.38	28.7786	2.52887	4.84693	1.3385	0.165469
YPL059W	GRX5	0.965043	0.8605	1.12149	20.2537	24.6884	1.21896	4.62576	0.285649	0.165419
YLR113W	HOG1	0.548409	0.489009	1.12147	34.3005	32.7017	0.95339	5.0313	-0.0688621	0.16539
YER056C	FCY2	0.313777	0.2798	1.12143	53.555	68.3516	1.27629	6.0949	0.351953	0.165345
YNL325C	FIG4	1.13664	1.01357	1.12142	7.14622	7.23128	1.0119	2.85425	0.0170712	0.16533
YNL323W	LEM3	1.13664	1.01357	1.12142	16.6574	17.3993	1.04454	4.12096	0.0628636	0.16533
YKL015W	PUT3	0.682769	0.608909	1.1213	13.1597	15.7033	1.19329	3.973	0.254946	0.165169
YKL016C	ATP7	0.682769	0.608909	1.1213	36.3667	32.519	0.894197	5.02321	-0.161335	0.165169
YLR348C	DIC1	0.886462	0.790605	1.12125	40.2855	26.1409	0.648892	4.70824	-0.62395	0.165103
YOR371C	GPB1	0.844233	0.753045	1.12109	16.6855	17.6333	1.0568	4.14023	0.0797065	0.164905
YGL173C	KEM1	0.944226	0.842255	1.12107	25.7654	18.7727	0.728601	4.23057	-0.456799	0.164876
YGL172W	NUP49	0.944226	0.842255	1.12107	17.0268	14.6214	0.858728	3.87001	-0.219726	0.164876
YPR121W	THI22	1.45173	1.29499	1.12104	12.2791	11.9231	0.971006	3.57568	-0.0424482	0.164835
YOL036W	YOL036W	0.755145	0.673616	1.12103	20.639	22.3014	1.08055	4.47906	0.111764	0.164828
YOR279C	RFM1	0.649389	0.579295	1.121	11.7619	12.5373	1.06592	3.64815	0.0921027	0.164786
YMR154C	RIM13	0.998336	0.890752	1.12078	12.0695	11.4502	0.948694	3.51731	-0.0759858	0.164502
YGR175C	ERG1	0.673768	0.601216	1.12067	36.1245	38.4956	1.06564	5.26662	0.0917159	0.164368
YHR143W	DSE2	0.58494	0.52198	1.12062	110.249	163.279	1.481	7.3512	0.566575	0.164295
YOR274W	MOD5	0.836875	0.746843	1.12055	16.4561	14.8432	0.901987	3.89173	-0.148822	0.164206
YNL314W	DAL82	1.27519	1.13805	1.1205	12.9307	13.9727	1.08058	3.80454	0.11181	0.164147
YNL315C	ATP11	1.27519	1.13805	1.1205	13.0102	14.9752	1.15103	3.9045	0.202923	0.164147
YDR238C	SEC26	1.14936	1.02581	1.12044	23.9947	18.7728	0.782371	4.23057	-0.354074	0.16407
YPR196W	YPR196W	1.14234	1.0196	1.12038	7.93595	6.61146	0.833102	2.72497	-0.263434	0.16399
YGL023C	PIB2	1.49164	1.33143	1.12033	10.5134	14.1776	1.34853	3.82554	0.431383	0.163926
YGL022W	STT3	1.49164	1.33143	1.12033	25.9523	20.4747	0.788936	4.35577	-0.342019	0.163926
YBR045C	GIP1	0.626275	0.559051	1.12025	5.10472	11.3152	2.21661	3.50019	1.14836	0.163817
YIL114C	POR2	0.986696	0.880983	1.12	15.4139	14.0535	0.91174	3.81285	-0.133305	0.163492
YFL004W	VTC2	1.1364	1.01473	1.11991	15.023	13.6612	0.909354	3.77201	-0.137086	0.163377
YGL247W	BRR6	1.06628	0.952171	1.11984	26.129	32.2295	1.23347	5.01031	0.302728	0.163294
YOR126C	IAH1	0.975209	0.870886	1.11979	18.3549	19.1437	1.04298	4.2588	0.0607057	0.163228
YOR127W	RGA1	0.975209	0.870886	1.11979	13.9915	13.243	0.946499	3.72715	-0.0793266	0.163228
YDR267C	CIA1	0.96984	0.866287	1.11954	13.1903	9.13814	0.692794	3.1919	-0.529501	0.162902
YAR002W	NUP60	0.776013	0.693353	1.11922	22.8253	19.8437	0.869372	4.31061	-0.201955	0.16249
YHR062C	RPP1	0.918002	0.820363	1.11902	22.16	12.6549	0.571069	3.66162	-0.808264	0.162236
YGR113W	DAM1	1.21322	1.08422	1.11898	19.4462	15.5515	0.79972	3.95898	-0.322432	0.162185
YBR195C	MSI1	0.711675	0.636016	1.11896	19.9046	17.622	0.885323	4.1393	-0.175724	0.162156
YKL170W	MRPL38	0.806378	0.720679	1.11892	26.4782	23.9092	0.902979	4.5795	-0.147236	0.162101
YFL028C	CAF16	0.802056	0.716831	1.11889	12.9999	38.8404	2.98774	5.27949	1.57905	0.16207
YNL016W	PUB1	0.680772	0.608468	1.11883	28.3174	18.8142	0.664404	4.23375	-0.589866	0.161991
YAL001C	TFC3	0.898052	0.802727	1.11875	14.2434	14.4794	1.01657	3.85593	0.0237067	0.161889
YDL173W	YDL173W	1.29363	1.15635	1.11871	17.2297	22.4959	1.30564	4.49159	0.384762	0.161842
YPL183W-A	YPL183W-A	1.01719	0.909296	1.11866	27.327	24.0734	0.88094	4.58937	-0.182884	0.161766
YLR405W	DUS4	0.834111	0.745675	1.1186	41.2339	27.3778	0.663963	4.77493	-0.590825	0.161692
YDL042C	SIR2	0.780387	0.697654	1.11859	10.1789	6.21177	0.610259	2.635	-0.712506	0.161676
YJR055W	HIT1	0.639465	0.571694	1.11854	9.22283	3.4157	0.370353	1.77218	-1.43303	0.161621
YLR440C	SEC39	0.732132	0.654622	1.1184	14.2878	13.114	0.917845	3.71303	-0.123677	0.161442
YMR139W	RIM11	1.09391	0.978123	1.11837	12.9068	19.3515	1.49932	4.27437	0.58431	0.161402
YDR137W	RGP1	1.20691	1.07918	1.11835	12.5117	10.2916	0.822562	3.3634	-0.281803	0.161376
YLR327C	TMA10	1.05529	0.943635	1.11833	22.559	51.9131	2.30122	5.69803	1.2024	0.16134
YKL138C	MRPL31	1.02884	0.920006	1.11829	24.2376	25.3342	1.04524	4.66302	0.0638387	0.161299
YKL137W	YKL137W	1.02884	0.920006	1.11829	20.8717	20.635	0.988662	4.36702	-0.0164513	0.161299
YFL003C	MSH4	0.880648	0.787518	1.11826	7.15322	6.81102	0.952161	2.76787	-0.070722	0.161252
YHR117W	TOM71	1.16982	1.04617	1.1182	19.1799	16.8371	0.877852	4.07357	-0.187951	0.161175
YMR259C	YMR259C	0.825474	0.738254	1.11814	11.5023	8.65789	0.752708	3.11401	-0.409839	0.161106
YLR461W	PAU4	0.96057	0.859226	1.11795	2.68461	3.2877	1.22465	1.71708	0.292366	0.160853
YIL136W	OM45	1.47379	1.3183	1.11794	19.3975	41.6974	2.14963	5.38189	1.10409	0.160848
YGL167C	PMR1	1.02271	0.914933	1.1178	23.9165	26.0744	1.09023	4.70456	0.124632	0.16066
YGL166W	CUP2	1.02271	0.914933	1.1178	12.7975	13.895	1.08576	3.79649	0.118702	0.16066
YPL139C	UME1	0.806128	0.721248	1.11769	14.9711	12.4477	0.831447	3.6378	-0.266303	0.160514
YKL023C-A	YKL023C-A	0.825608	0.73868	1.11768	23.141	14.2302	0.614935	3.83088	-0.701494	0.160507
YKL023W	YKL023W	0.825608	0.73868	1.11768	22.3322	38.2584	1.71315	5.25771	0.77665	0.160507
YKL024C	URA6	0.825608	0.73868	1.11768	20.7544	19.159	0.92313	4.25995	-0.115394	0.160507
YNL009W	IDP3	0.840469	0.751987	1.11766	11.5407	13.3253	1.15464	3.7361	0.207439	0.160487
YMR040W	YET2	1.26371	1.13086	1.11748	11.9294	14.5451	1.21926	3.86246	0.286009	0.160252
YOR141C	ARP8	0.974758	0.872306	1.11745	14.2908	14.7348	1.03107	3.88116	0.0441395	0.16021
YOR142W	LSC1	0.974758	0.872306	1.11745	26.3158	30.0822	1.14312	4.91084	0.192982	0.16021
YGR133W	PEX4	1.371	1.22695	1.1174	11.2645	13.9794	1.24101	3.80523	0.311512	0.160144
YBR001C	NTH2	0.512343	0.458522	1.11738	19.6748	23.1864	1.17848	4.53521	0.236931	0.160118
YER099C	PRS2	1.29005	1.1546	1.11731	17.2952	13.4127	0.775517	3.74553	-0.366769	0.160028
YMR140W	SIP5	0.702391	0.628798	1.11704	17.3547	27.9308	1.60941	4.80378	0.686529	0.159679
YHL010C	YHL010C	0.845179	0.756645	1.11701	14.4286	14.341	0.993929	3.84208	-0.00878551	0.15964
YBR279W	PAF1	0.832181	0.745014	1.117	20.9464	20.8328	0.994577	4.38078	-0.00784466	0.159629
YDR014W	RAD61	1.18704	1.06274	1.11696	8.23138	8.03673	0.976353	3.00661	-0.0345256	0.159574
YDR493W	FMP36	0.906823	0.811908	1.1169	24.0461	31.4682	1.30866	4.97582	0.388092	0.159505
YDR218C	SPR28	0.876016	0.784329	1.1169	5.00112	4.05948	0.811715	2.0213	-0.300955	0.159499
YGL066W	SGF73	0.851245	0.762173	1.11687	15.5039	23.0898	1.48929	4.52919	0.574629	0.159456
YNR050C	LYS9	0.863827	0.773454	1.11684	11.7544	18.5358	1.57692	4.21224	0.657109	0.159427
YJL173C	RFA3	1.33825	1.19831	1.11678	33.8852	23.7373	0.700522	4.56908	-0.513498	0.159351
YOL137W	BSC6	0.968218	0.867056	1.11667	16.89	13.8143	0.817895	3.78809	-0.290013	0.159208
YOL138C	YOL138C	0.968218	0.867056	1.11667	10.2752	12.2638	1.19353	3.61633	0.25524	0.159208
YGR253C	PUP2	0.740967	0.663556	1.11666	41.8401	25.0888	0.599635	4.64897	-0.737843	0.159192
YOR359W	VTS1	0.863913	0.773673	1.11664	25.863	15.8265	0.611935	3.98427	-0.708549	0.159162
YGR086C	PIL1	0.436839	0.391244	1.11654	97.8174	91.2909	0.933278	6.5124	-0.0996208	0.159034
YDL133W	YDL133W	0.50568	0.452942	1.11644	21.3436	22.3225	1.04587	4.48043	0.0647	0.1589
YER150W	SPI1	0.713404	0.63902	1.1164	17.4387	23.2348	1.33237	4.53821	0.413991	0.158859
YPL272C	YPL272C	1.04635	0.937262	1.11639	10.7978	10.4261	0.965569	3.38212	-0.0505485	0.158838
YDL110C	TMA17	1.00357	0.898976	1.11634	42.7247	51.7266	1.2107	5.69283	0.275837	0.15878
YDR407C	TRS120	1.08471	0.971714	1.11628	14.6261	14.2827	0.976524	3.8362	-0.0342725	0.158705
YMR080C	NAM7	0.84904	0.76061	1.11626	19.9874	14.5927	0.730096	3.86718	-0.453842	0.158675
YER116C	SLX8	0.553112	0.495526	1.11621	13.5583	14.3612	1.05922	3.8441	0.0829956	0.158611
YER117W	RPL23B	0.553112	0.495526	1.11621	97.6891	103.427	1.05873	6.69246	0.0823383	0.158611
YOR213C	SAS5	0.889333	0.796744	1.11621	16.837	18.3421	1.08939	4.19709	0.123525	0.158607
YJL168C	SET2	0.921063	0.825302	1.11603	22.1624	18.474	0.833572	4.20742	-0.262621	0.158378
YHL016C	DUR3	1.08326	0.970851	1.11578	10.2156	16.6296	1.62787	4.05568	0.702981	0.158056
YHR170W	NMD3	0.934057	0.837164	1.11574	18.5638	6.75702	0.36399	2.75639	-1.45803	0.158
YLR093C	NYV1	0.716522	0.642228	1.11568	22.7178	30.9087	1.36055	4.94994	0.444192	0.157924
YML128C	MSC1	1.04629	0.938081	1.11535	26.6986	49.3132	1.84703	5.6239	0.885209	0.157502
YML127W	RSC9	1.04629	0.938081	1.11535	19.9731	13.8013	0.690992	3.78673	-0.533259	0.157502
YJL181W	YJL181W	0.739054	0.662629	1.11534	16.4271	14.493	0.882262	3.85729	-0.180721	0.157479
YDR283C	GCN2	0.698012	0.625888	1.11523	11.744	15.6828	1.3354	3.97112	0.417268	0.157346
YER041W	YEN1	0.705759	0.63291	1.1151	10.4838	10.5792	1.0091	3.40316	0.0130719	0.157175
YOL094C	RFC4	0.84475	0.757626	1.115	14.3948	16.8164	1.16823	4.0718	0.224321	0.157039
YOL093W	TRM10	0.84475	0.757626	1.115	14.6399	25.9708	1.77397	4.69882	0.826978	0.157039
YHR185C	PFS1	0.322266	0.289054	1.1149	3.10744	2.87626	0.925605	1.52419	-0.111531	0.156915
YGR112W	SHY1	1.08247	0.970962	1.11484	9.98157	14.5235	1.45503	3.86032	0.541052	0.156841
YOR183W	FYV12	0.790869	0.709403	1.11484	12.9936	11.845	0.911606	3.56621	-0.133517	0.156835
YJR138W	IML1	1.02554	0.919925	1.11481	12.006	13.0302	1.08531	3.70379	0.118106	0.156795
YJL004C	SYS1	0.928701	0.833106	1.11474	19.5692	18.1569	0.927827	4.18244	-0.108073	0.156713
YML072C	TCB3	0.919687	0.825057	1.11469	26.4144	23.7881	0.900572	4.57217	-0.151086	0.156649
YPL188W	POS5	0.738401	0.662443	1.11466	12.2608	29.9255	2.44076	4.9033	1.28733	0.156609
YBL079W	NUP170	0.811602	0.728137	1.11463	20.0066	13.6022	0.679884	3.76576	-0.55664	0.156564
YDR178W	SDH4	0.829022	0.743829	1.11453	16.7	20.7095	1.24009	4.37222	0.310443	0.156439
YML081W	YML081W	0.855276	0.767409	1.1145	17.1169	14.005	0.818196	3.80787	-0.289482	0.156395
YJR118C	ILM1	0.939132	0.842651	1.1145	22.7927	14.0142	0.614856	3.80882	-0.70168	0.156392
YPL178W	CBC2	0.746972	0.670384	1.11424	20.7976	21.9793	1.05682	4.45807	0.0797278	0.156065
YDR529C	QCR7	1.06424	0.955251	1.11409	32.1938	37.6306	1.16888	5.23383	0.225124	0.155867
YIL001W	YIL001W	0.797357	0.715713	1.11407	16.1863	13.6952	0.846096	3.77559	-0.241107	0.155844
YIL002C	INP51	0.797357	0.715713	1.11407	14.3319	14.2314	0.992993	3.83101	-0.0101444	0.155844
YGL232W	TAN1	0.825818	0.741266	1.11406	17.3647	17.0332	0.980908	4.09028	-0.0278098	0.155831
YDR423C	CAD1	1.16515	1.04585	1.11406	21.3701	22.8439	1.06897	4.51374	0.0962191	0.155827
YHL027W	RIM101	0.581562	0.522021	1.11406	22.8504	40.8578	1.78806	5.35254	0.838392	0.155825
YLR388W	RPS29A	0.691488	0.620743	1.11397	87.1184	75.7831	0.869887	6.2438	-0.201101	0.155708
YLR387C	REH1	0.691488	0.620743	1.11397	17.6636	24.3845	1.38049	4.60789	0.465182	0.155708
YJL014W	CCT3	1.10955	0.996092	1.1139	22.01	14.1172	0.641399	3.81938	-0.640706	0.155619
YBR196C	PGI1	0.528465	0.474455	1.11384	78.2131	68.0177	0.869646	6.08784	-0.2015	0.155537
YNL286W	CUS2	0.915817	0.822242	1.1138	15.755	15.5527	0.987163	3.9591	-0.0186399	0.155496
YOL005C	RPB11	1.00117	0.898899	1.11377	54.6879	30.4142	0.556142	4.92667	-0.846475	0.155456
YOR328W	PDR10	0.96637	0.867683	1.11374	7.09715	8.57345	1.20801	3.09988	0.272636	0.155407
YMR260C	TIF11	0.734341	0.659365	1.11371	32.9056	21.6635	0.658352	4.43719	-0.603069	0.155372
YFR018C	YFR018C	1.20416	1.08125	1.11367	11.164	8.16527	0.731393	3.0295	-0.451282	0.155318
YFR019W	FAB1	1.20416	1.08125	1.11367	12.5831	10.6707	0.84802	3.41558	-0.237829	0.155318
YDR307W	YDR307W	0.592632	0.532145	1.11367	12.6401	12.0326	0.95194	3.58888	-0.0710568	0.155316
YOR091W	TMA46	0.947575	0.85093	1.11358	35.0446	26.5109	0.75649	4.72851	-0.402606	0.1552
YHR007C-A	YHR007C-A	0.664195	0.596455	1.11357	46.1596	55.0805	1.19326	5.78347	0.254913	0.155194
YJL003W	COX16	0.926674	0.832205	1.11352	21.2477	19.3781	0.912011	4.27636	-0.132877	0.155122
YHR153C	SPO16	0.854878	0.767747	1.11349	13.3	8.97463	0.674786	3.16585	-0.567499	0.155087
YHR154W	RTT107	0.854878	0.767747	1.11349	12.2099	4.73413	0.387729	2.2431	-1.36688	0.155087
YNL164C	IBD2	0.822342	0.738554	1.11345	14.1143	7.84787	0.556023	2.9723	-0.846783	0.155035
YBR273C	UBX7	1.10492	0.992398	1.11339	13.1428	10.8837	0.82811	3.44409	-0.272105	0.154956
YBR274W	CHK1	1.10492	0.992398	1.11339	9.26155	9.76765	1.05465	3.28801	0.0767579	0.154956
YIL105C	SLM1	0.872721	0.783923	1.11327	19.7504	18.8902	0.956448	4.23957	-0.0642423	0.15481
YBR129C	OPY1	1.0938	0.982599	1.11317	13.4725	14.4814	1.07489	3.85613	0.104189	0.154671
YPR002W	PDH1	0.620192	0.557168	1.11312	6.80836	6.35948	0.93407	2.66891	-0.0983979	0.154603
YPL186C	UIP4	0.835505	0.750692	1.11298	8.56637	11.7249	1.36871	3.5515	0.452821	0.154427
YNR007C	ATG3	1.11637	1.00308	1.11294	8.77512	10.1302	1.15442	3.34059	0.207167	0.15438
YNR008W	LRO1	1.11637	1.00308	1.11294	15.2114	13.5928	0.893592	3.76477	-0.162312	0.15438
YER094C	PUP3	1.32141	1.18735	1.11291	29.9317	21.4045	0.715111	4.41984	-0.483761	0.154333
YJR096W	YJR096W	1.02409	0.920269	1.11282	26.1017	28.5183	1.09258	4.83381	0.12774	0.154214
YAL054C	ACS1	0.416233	0.374043	1.11279	8.2306	8.34345	1.01371	3.06064	0.019646	0.154188
YAL053W	FLC2	0.416233	0.374043	1.11279	15.962	15.1388	0.948428	3.92018	-0.07639	0.154188
YDL129W	YDL129W	0.741094	0.666035	1.11269	19.7233	10.5602	0.535417	3.40057	-0.901264	0.154058
YHR015W	MIP6	0.727593	0.653909	1.11268	4.44297	11.3903	2.56367	3.50973	1.35821	0.154042
YPL085W	SEC16	0.925864	0.832121	1.11266	15.671	12.395	0.790948	3.63168	-0.338345	0.154007
YHR099W	TRA1	1.25581	1.12869	1.11263	16.2942	12.8611	0.789309	3.68495	-0.341339	0.153971
YNL039W	BDP1	0.865017	0.777467	1.11261	19.8908	13.5353	0.680481	3.75866	-0.555373	0.153947
YAR050W	FLO1	0.928731	0.83475	1.11259	7.71527	7.66653	0.993683	2.93857	-0.00914206	0.153916
YMR146C	TIF34	0.85585	0.769299	1.11251	41.7439	32.8474	0.786878	5.03771	-0.345787	0.153813
YLR336C	SGD1	0.747253	0.671746	1.11241	14.5705	8.88367	0.609703	3.15116	-0.713822	0.153682
YMR185W	YMR185W	0.664867	0.597708	1.11236	9.21121	5.97817	0.64901	2.5797	-0.623687	0.153627
YDR130C	FIN1	1.16225	1.04493	1.11228	17.8284	12.0672	0.676852	3.59302	-0.563088	0.153517
YLR263W	RED1	1.22126	1.09802	1.11224	11.6865	11.411	0.976419	3.51235	-0.0344282	0.153465
YLR262C-A	TMA7	1.22126	1.09802	1.11224	40.2022	36.2279	0.901142	5.17903	-0.150174	0.153465
YDL206W	YDL206W	0.726295	0.653042	1.11217	11.169	14.8961	1.3337	3.89686	0.415434	0.153381
YGL075C	MPS2	1.27053	1.14243	1.11213	15.5502	14.2016	0.913275	3.82798	-0.130879	0.153322
YNL045W	YNL045W	1.20845	1.08672	1.11201	18.2686	23.9404	1.31047	4.58138	0.390082	0.153172
YNL229C	URE2	0.708708	0.637351	1.11196	16.7871	28.6316	1.70557	4.83954	0.770255	0.153103
YAL049C	YAL049C	1.04332	0.938279	1.11195	15.4985	27.3511	1.76476	4.77352	0.819471	0.15309
YJR108W	ABM1	1.1199	1.00717	1.11193	18.3948	13.2074	0.717993	3.72327	-0.477959	0.153066
YJL115W	ASF1	0.936036	0.841969	1.11172	17.7671	8.87188	0.499343	3.14924	-1.0019	0.152797
YJL143W	TIM17	0.941917	0.847262	1.11172	24.9688	21.7582	0.871415	4.44349	-0.198568	0.152792
YHR138C	YHR138C	0.909677	0.818284	1.11169	13.9597	114.783	8.22239	6.84276	3.03956	0.152752
YLR234W	TOP3	1.3772	1.23886	1.11167	7.61968	5.00804	0.657251	2.32425	-0.605484	0.152725
YLR233C	EST1	1.3772	1.23886	1.11167	12.0306	7.26484	0.603864	2.86093	-0.727704	0.152725
YBR058C-A	TSC3	0.923945	0.83123	1.11154	20.0354	19.2851	0.962552	4.26941	-0.0550635	0.15256
YGL067W	NPY1	0.960705	0.864358	1.11147	17.2587	16.8972	0.979057	4.07871	-0.0305356	0.152464
YGR239C	PEX21	0.93901	0.845025	1.11122	18.9835	24.1318	1.2712	4.59287	0.346191	0.152146
YDR282C	YDR282C	1.19289	1.07364	1.11108	8.39552	9.19661	1.09542	3.2011	0.131483	0.15196
YER129W	SAK1	1.12324	1.01097	1.11105	17.5423	16.1577	0.921071	4.01415	-0.118616	0.151928
YPL083C	SEN54	0.718936	0.647077	1.11105	15.5786	18.0476	1.15849	4.17374	0.212242	0.151926
YOR103C	OST2	1.01811	0.916405	1.11098	27.8741	19.8273	0.711316	4.30941	-0.491437	0.151837
YGR198W	YPP1	1.02349	0.92125	1.11098	19.8842	16.6942	0.839569	4.06127	-0.252278	0.151833
YGR197C	SNG1	1.02349	0.92125	1.11098	12.5182	13.7966	1.10212	3.78625	0.140287	0.151833
YML131W	YML131W	0.791942	0.712839	1.11097	6.6361	9.30749	1.40256	3.21839	0.488058	0.151818
YHR001W	OSH7	0.768795	0.69212	1.11078	17.1964	15.2853	0.888868	3.93407	-0.169959	0.151577
YMR181C	YMR181C	0.970468	0.873684	1.11078	48.8327	59.3589	1.21556	5.89139	0.281617	0.15157
YPR143W	RRP15	0.871782	0.784902	1.11069	17.3462	10.7321	0.618699	3.42385	-0.69269	0.151456
YPR141C	KAR3	0.871782	0.784902	1.11069	12.2095	7.58104	0.620911	2.9224	-0.687541	0.151456
YDR067C	OCA6	1.12855	1.01611	1.11065	17.5551	22.3505	1.27316	4.48223	0.348416	0.151409
YDR068W	DOS2	1.12855	1.01611	1.11065	14.5143	16.8375	1.16007	4.07361	0.214209	0.151409
YKL193C	SDS22	0.978354	0.880944	1.11057	14.2508	18.3522	1.2878	4.19788	0.364906	0.151305
YFL023W	BUD27	0.603654	0.543555	1.11057	12.0923	7.31691	0.605087	2.87123	-0.724785	0.151297
YFL024C	EPL1	0.603654	0.543555	1.11057	30.7694	25.8291	0.83944	4.69092	-0.252501	0.151297
YMR257C	PET111	0.823835	0.741908	1.11043	13.0736	14.273	1.09174	3.83522	0.126634	0.151114
YBL001C	ECM15	0.760178	0.684584	1.11042	84.8806	90.9048	1.07097	6.50629	0.0989228	0.151109
YIL033C	BCY1	0.988956	0.890616	1.11042	27.7651	27.1598	0.978202	4.7634	-0.0317952	0.151103
YOR066W	YOR066W	0.433778	0.390723	1.1102	23.2859	19.6363	0.843272	4.29545	-0.24593	0.150813
YLR293C	GSP1	0.661297	0.595662	1.11019	52.5857	26.4722	0.503412	4.72641	-0.990189	0.150805
YDR257C	SET7	0.660887	0.595399	1.10999	15.4912	19.2235	1.24093	4.2648	0.311424	0.150545
YPL047W	SGF11	0.913209	0.822775	1.10991	24.6637	21.0458	0.853313	4.39546	-0.228852	0.150448
YOR148C	SPP2	1.01035	0.910423	1.10976	18.9944	18.5014	0.974048	4.20957	-0.0379345	0.15025
YOR311C	HSD1	0.871934	0.785771	1.10965	18.756	22.353	1.19178	4.4824	0.253114	0.150109
YPR043W	RPL43A	0.647057	0.583237	1.10942	115.26	114.759	0.995653	6.84246	-0.00628449	0.149809
YPR042C	PUF2	0.647057	0.583237	1.10942	19.047	21.1902	1.11252	4.40533	0.153834	0.149809
YOR117W	RPT5	0.836459	0.753996	1.10937	24.7674	17.205	0.694663	4.10475	-0.525616	0.149738
YCR011C	ADP1	0.977203	0.880912	1.10931	19.0666	15.7727	0.827242	3.97935	-0.273619	0.14966
YNL038W	GPI15	0.760252	0.685348	1.10929	20.4218	25.097	1.22893	4.64945	0.297408	0.149641
YOR089C	VPS21	0.788264	0.710616	1.10927	30.6318	33.2446	1.0853	5.05505	0.118091	0.149609
YER010C	YER010C	1.20523	1.08662	1.10915	17.8992	17.9053	1.00034	4.16231	0.000489262	0.14946
YER049W	TPA1	0.707686	0.638085	1.10908	19.5775	15.7664	0.805331	3.97878	-0.312347	0.149361
YBR227C	MCX1	1.02149	0.921103	1.10899	11.4069	13.7332	1.20393	3.77959	0.267755	0.149243
YBR228W	SLX1	1.02149	0.921103	1.10899	14.8382	17.9133	1.20724	4.16296	0.271714	0.149243
YBR109C	CMD1	0.832179	0.750404	1.10898	27.3966	28.0326	1.02321	4.80903	0.0331062	0.149228
YBR110W	ALG1	0.832179	0.750404	1.10898	11.0859	16.1123	1.4534	4.01009	0.539432	0.149228
YER142C	MAG1	0.978993	0.882838	1.10891	10.0777	15.8816	1.57591	3.98929	0.656186	0.149149
YER143W	DDI1	0.978993	0.882838	1.10891	15.7396	12.7607	0.810741	3.67364	-0.302687	0.149149
YNL035C	YNL035C	0.792498	0.714749	1.10878	19.0534	11.9508	0.627229	3.57904	-0.672937	0.148971
YLR143W	YLR143W	0.817257	0.737112	1.10873	12.3962	10.7162	0.864471	3.42172	-0.21011	0.148906
YOL075C	YOL075C	1.32118	1.19165	1.1087	9.8175	9.6776	0.98575	3.27465	-0.0207061	0.148863
YDR373W	FRQ1	0.853551	0.769884	1.10868	13.309	22.9057	1.72107	4.51764	0.783309	0.148837
YDR372C	VPS74	0.853551	0.769884	1.10868	20.2227	29.7447	1.47086	4.89456	0.556656	0.148837
YNL163C	RIA1	1.11319	1.00419	1.10855	12.9919	9.23154	0.710561	3.20657	-0.492969	0.148668
YNL162W-A	YNL162W-A	1.11319	1.00419	1.10855	10.5081	10.1879	0.969527	3.34879	-0.0446466	0.148668
YDR260C	SWM1	0.947475	0.854716	1.10853	20.5868	18.976	0.921756	4.24611	-0.117543	0.148642
YJL089W	SIP4	0.78528	0.708439	1.10846	9.10676	37.593	4.12803	5.23239	2.04545	0.148563
YBR264C	YPT10	0.888797	0.801972	1.10826	16.1447	13.5049	0.836494	3.75542	-0.257573	0.148302
YBR265W	TSC10	0.888797	0.801972	1.10826	17.8384	10.8131	0.60617	3.4347	-0.722206	0.148302
YKR021W	ALY1	1.21508	1.09652	1.10812	11.7789	15.1001	1.28196	3.91649	0.358353	0.148121
YLR300W	EXG1	0.328402	0.296363	1.10811	151.775	90.2475	0.594615	6.49582	-0.749971	0.148101
YJL189W	RPL39	0.363855	0.32836	1.1081	138.803	131.194	0.945176	7.03555	-0.0813452	0.148086
YJL190C	RPS22A	0.363855	0.32836	1.1081	126.572	104.991	0.829498	6.71412	-0.26969	0.148086
YPL229W	YPL229W	1.16469	1.05108	1.10808	13.4895	20.3226	1.50656	4.34501	0.591255	0.148068
YLR454W	FMP27	0.74276	0.670505	1.10776	12.8978	16.0028	1.24074	4.00025	0.311199	0.147649
YER046W	SPO73	0.986058	0.890147	1.10775	19.8199	20.8098	1.04994	4.37919	0.0703107	0.147628
YNL005C	MRP7	1.12419	1.01487	1.10772	24.1284	27.814	1.15275	4.79774	0.205079	0.147594
YMR200W	ROT1	0.684105	0.617633	1.10762	31.1045	39.2935	1.26327	5.29622	0.337168	0.147466
YKL160W	ELF1	0.588127	0.531076	1.10742	29.2122	29.6961	1.01656	4.8922	0.0237007	0.147208
YKL142W	MRP8	0.723095	0.652953	1.10742	27.3854	44.9763	1.64235	5.49109	0.71576	0.147205
YJR153W	PGU1	0.836692	0.755578	1.10735	7.89193	18.4399	2.33655	4.20476	1.22438	0.147117
YJR075W	HOC1	1.15306	1.04129	1.10734	21.9292	21.1474	0.964348	4.40241	-0.0523738	0.147101
YDL141W	BPL1	1.02382	0.924599	1.10732	13.0948	13.0192	0.994225	3.70257	-0.00835589	0.147067
YDL142C	CRD1	1.02382	0.924599	1.10732	18.0421	17.1587	0.951032	4.10086	-0.0724336	0.147067
YBR082C	UBC4	0.641152	0.579071	1.10721	52.7401	33.4829	0.634867	5.06535	-0.655474	0.146926
YOR367W	SCP1	0.969152	0.875383	1.10712	18.9944	23.8703	1.2567	4.57715	0.329646	0.146809
YMR292W	GOT1	0.765741	0.691662	1.1071	23.4007	16.0878	0.68749	4.00789	-0.54059	0.146789
YOL090W	MSH2	0.825911	0.746057	1.10703	13.6968	11.9293	0.870956	3.57644	-0.199329	0.1467
YER025W	GCD11	0.991156	0.895445	1.10689	31.7181	20.9656	0.660998	4.38995	-0.597282	0.146507
YJL187C	SWE1	0.915789	0.827361	1.10688	18.352	15.0847	0.821968	3.91502	-0.282846	0.146498
YPR016C	TIF6	0.856092	0.773486	1.1068	35.982	22.1134	0.614567	4.46685	-0.702358	0.146391
YJR086W	STE18	0.916556	0.828196	1.10669	49.5465	52.4617	1.05884	5.71319	0.0824825	0.14625
YJL176C	SWI3	1.52732	1.38008	1.10669	17.4379	12.4236	0.71245	3.63501	-0.48914	0.146246
YOR377W	ATF1	1.01754	0.919492	1.10663	21.7791	22.8667	1.04994	4.51518	0.0703038	0.146178
YMR282C	AEP2	1.15335	1.04227	1.10657	14.94	11.3611	0.760449	3.50603	-0.395076	0.14609
YHL003C	LAG1	1.1008	0.994825	1.10652	20.9671	23.4062	1.11633	4.54882	0.158767	0.146033
YPL194W	DDC1	0.878517	0.793982	1.10647	8.16765	7.68888	0.941382	2.94277	-0.0871478	0.145963
YGR270W	YTA7	0.908981	0.821588	1.10637	20.4305	18.6829	0.914463	4.22365	-0.129003	0.145835
YGR268C	HUA1	0.908981	0.821588	1.10637	28.776	36.0231	1.25185	5.17085	0.324059	0.145835
YGR026W	YGR026W	0.878082	0.793684	1.10634	21.0967	27.1646	1.28762	4.76366	0.364712	0.14579
YGR024C	THG1	0.878082	0.793684	1.10634	18.8184	15.5602	0.826861	3.95979	-0.274283	0.14579
YLL029W	YLL029W	0.677203	0.612144	1.10628	31.5263	50.6728	1.60732	5.66314	0.684657	0.145718
YPL065W	VPS28	0.670771	0.606337	1.10627	15.0434	13.6688	0.908626	3.77282	-0.138242	0.145701
YER005W	YND1	1.02949	0.9306	1.10626	22.0788	17.7064	0.801961	4.1462	-0.318396	0.145694
YDR424C	DYN2	1.16118	1.04965	1.10625	32.3865	39.0343	1.20526	5.28667	0.269349	0.145682
YDR425W	SNX41	1.16118	1.04965	1.10625	13.0609	52.3194	4.00581	5.70927	2.00209	0.145682
YKL067W	YNK1	0.649874	0.587604	1.10597	28.7723	43.2768	1.50411	5.43552	0.588913	0.145315
YGL230C	YGL230C	0.724093	0.65472	1.10596	11.1321	13.1477	1.18106	3.71674	0.24008	0.145297
YBR260C	RGD1	1.1414	1.03205	1.10595	14.2225	11.1398	0.78325	3.47765	-0.352455	0.145292
YCR082W	AHC2	1.06201	0.9603	1.10592	25.9368	23.5555	0.908186	4.55799	-0.13894	0.145246
YLR019W	PSR2	0.592246	0.535525	1.10592	16.5793	17.6659	1.06554	4.14289	0.091584	0.145242
YLR018C	POM34	0.592246	0.535525	1.10592	19.901	15.5822	0.782986	3.96183	-0.352941	0.145242
YOR326W	MYO2	0.671398	0.607105	1.1059	20.6168	14.0659	0.682256	3.81413	-0.551614	0.145224
YOR324C	FRT1	0.671398	0.607105	1.1059	13.8761	11.7775	0.848759	3.55796	-0.236574	0.145224
YDR476C	YDR476C	1.39758	1.26377	1.10588	27.758	38.9687	1.40387	5.28424	0.489412	0.145195
YER012W	PRE1	1.01105	0.914348	1.10576	39.2698	20.3895	0.519216	4.34975	-0.945594	0.145043
YFR015C	GSY1	0.745378	0.674101	1.10574	14.0727	21.8438	1.55221	4.44915	0.634324	0.145008
YDR156W	RPA14	0.654484	0.591903	1.10573	44.5854	41.3505	0.927445	5.36983	-0.108666	0.144998
YDR155C	CPR1	0.654484	0.591903	1.10573	117.288	124.771	1.0638	6.96314	0.0892284	0.144998
YJL136C	RPS21B	0.518913	0.469299	1.10572	81.5695	81.1572	0.994945	6.34265	-0.00731086	0.144984
YPR045C	MNI2	1.215	1.09884	1.10571	22.5717	24.4772	1.08442	4.61337	0.116923	0.144968
YPR046W	MCM16	1.215	1.09884	1.10571	16.341	14.706	0.899945	3.87833	-0.152092	0.144968
YBR036C	CSG2	1.00626	0.910186	1.10555	23.6005	26.5109	1.12332	4.72851	0.167768	0.144763
YNL010W	YNL010W	0.993692	0.898843	1.10552	30.66	22.554	0.735616	4.49531	-0.442975	0.14473
YGR143W	SKN1	0.572232	0.517699	1.10534	22.1384	25.6286	1.15765	4.67968	0.211202	0.144489
YFL034C-A	RPL22B	0.613233	0.554797	1.10533	124.65	134.922	1.0824	7.07598	0.11424	0.144475
YFL034W	YFL034W	0.613233	0.554797	1.10533	10.3472	10.8564	1.04921	3.44048	0.0693079	0.144475
YIL083C	YIL083C	1.13211	1.02427	1.10529	17.4895	15.7929	0.902994	3.9812	-0.147212	0.144421
YGL106W	MLC1	1.16976	1.05834	1.10527	29.0949	31.978	1.09909	4.99901	0.136314	0.144403
YGL107C	RMD9	1.16976	1.05834	1.10527	18.9268	17.0354	0.900066	4.09046	-0.151897	0.144403
YOL086W-A	YOL086W-A	1.14619	1.03704	1.10526	211.058	150.363	0.712425	7.2323	-0.48919	0.144382
YOL087C	YOL087C	1.14619	1.03704	1.10526	13.8686	14.8191	1.06854	3.88938	0.0956376	0.144382
YDL001W	RMD1	0.869646	0.786936	1.1051	13.6124	9.47463	0.696029	3.24407	-0.52278	0.144181
YDL002C	NHP10	0.869646	0.786936	1.1051	15.7194	15.1448	0.963443	3.92075	-0.0537283	0.144181
YBL055C	YBL055C	0.960383	0.869115	1.10501	20.7298	16.0122	0.772426	4.0011	-0.372532	0.144062
YGR213C	RTA1	0.388226	0.351375	1.10488	9.56545	11.9608	1.25042	3.58025	0.322414	0.143886
YGR214W	RPS0A	0.388226	0.351375	1.10488	67.0246	58.5617	0.873734	5.87188	-0.194734	0.143886
YNR015W	SMM1	1.03931	0.940702	1.10483	21.2385	13.8019	0.649851	3.78679	-0.62182	0.143822
YNL106C	INP52	0.94108	0.851825	1.10478	10.2986	10.213	0.991682	3.35233	-0.0120503	0.143761
YGR180C	RNR4	0.816814	0.739457	1.10461	16.9707	18.2511	1.07545	4.18991	0.10494	0.143541
YJL138C	TIF2	0.737735	0.667869	1.10461	51.6078	34.3939	0.666449	5.10408	-0.585434	0.143538
YDL192W	ARF1	0.786865	0.712447	1.10445	58.8506	37.2201	0.632451	5.21801	-0.660974	0.143334
YDR416W	SYF1	1.05473	0.955071	1.10435	20.8013	17.5261	0.842552	4.13144	-0.247163	0.143198
YDR415C	YDR415C	1.05473	0.955071	1.10435	17.9539	19.1309	1.06556	4.25783	0.0916051	0.143198
YMR194W	RPL36A	0.778276	0.704806	1.10424	82.9224	68.5218	0.826336	6.09849	-0.2752	0.143057
YDR404C	RPB7	0.90883	0.823049	1.10422	23.5056	25.8174	1.09835	4.69027	0.135339	0.143032
YDR405W	MRP20	0.90883	0.823049	1.10422	23.6008	26.9546	1.14211	4.75246	0.191699	0.143032
YOR033C	EXO1	0.730935	0.661963	1.10419	16.4669	14.5277	0.882237	3.86074	-0.180762	0.142992
YDR463W	STP1	0.920103	0.833305	1.10416	20.5407	24.0335	1.17004	4.58698	0.226563	0.142951
YNL115C	YNL115C	1.24397	1.12663	1.10415	9.9218	16.1038	1.62307	4.00933	0.698727	0.142933
YLR253W	YLR253W	1.05936	0.959504	1.10407	15.7882	13.842	0.876732	3.79098	-0.189793	0.142826
YKL224C	PAU16	0.698393	0.63257	1.10406	2.27414	3.23951	1.4245	1.69578	0.510453	0.142813
YHR112C	YHR112C	1.33552	1.2097	1.10401	13.7335	20.3049	1.47849	4.34376	0.564129	0.142758
YJL024C	APS3	0.523163	0.473884	1.10399	15.2543	14.5615	0.954583	3.86409	-0.0670575	0.142729
YDR142C	PEX7	0.697376	0.631688	1.10399	13.1869	14.819	1.12377	3.88938	0.168348	0.142724
YJL002C	OST1	1.04592	0.94752	1.10385	28.7429	20.1533	0.701158	4.33294	-0.512189	0.142544
YLR027C	AAT2	1.05477	0.955666	1.1037	37.7188	98.0939	2.60067	6.61609	1.37888	0.14235
YOL081W	IRA2	1.23945	1.12312	1.10358	16.3682	17.8034	1.08768	4.15408	0.12126	0.142185
YGL085W	YGL085W	0.663737	0.60145	1.10356	13.6255	18.7755	1.37797	4.23078	0.462543	0.142167
YLR021W	YLR021W	1.02736	0.931013	1.10349	20.2254	16.6948	0.825438	4.06132	-0.276769	0.142067
YLR020C	YEH2	1.02736	0.931013	1.10349	12.6294	12.6018	0.997816	3.65556	-0.0031543	0.142067
YMR272C	SCS7	0.920134	0.833914	1.10339	23.0678	25.8106	1.11891	4.68989	0.162089	0.141945
YPL096C-A	ERI1	1.23924	1.12315	1.10336	20.6507	32.5416	1.57581	5.02421	0.656093	0.141903
YPL096W	PNG1	1.23924	1.12315	1.10336	13.567	17.1069	1.26092	4.09651	0.334482	0.141903
YGR231C	PHB2	0.767423	0.695581	1.10328	21.9793	19.2833	0.87734	4.26928	-0.188793	0.141803
YIL064W	YIL064W	1.31091	1.18825	1.10322	14.2233	6.93328	0.487459	2.79354	-1.03665	0.141725
YIL065C	FIS1	1.31091	1.18825	1.10322	13.4089	13.6952	1.02135	3.7756	0.0304811	0.141725
YLR274W	CDC46	0.810053	0.734339	1.1031	14.8262	9.50865	0.641339	3.24924	-0.640841	0.14157
YLR273C	PIG1	0.810053	0.734339	1.1031	5.68772	5.70519	1.00307	2.51227	0.00442319	0.14157
YCR089W	FIG2	0.75947	0.688488	1.1031	11.6448	18.5228	1.59065	4.21123	0.669615	0.141561
YML016C	PPZ1	0.694997	0.630054	1.10307	20.5553	28.7673	1.39951	4.84636	0.484923	0.14153
YLL039C	UBI4	0.747757	0.677909	1.10304	44.7017	70.3921	1.57471	6.13734	0.655084	0.141479
YER133W	GLC7	0.890471	0.80731	1.10301	45.4912	38.2403	0.84061	5.25702	-0.250492	0.141446
YDR018C	YDR018C	0.879193	0.797092	1.103	11.7485	14.5255	1.23637	3.86051	0.306113	0.141434
YNR047W	YNR047W	1.29953	1.17825	1.10293	17.1143	19.6035	1.14545	4.29304	0.195915	0.141341
YMR255W	GFD1	1.03465	0.938231	1.10277	15.726	18.1756	1.15576	4.18393	0.208848	0.141133
YDR352W	YDR352W	0.662451	0.600722	1.10276	23.6736	29.51	1.24654	4.88313	0.317924	0.141117
YMR233W	YMR233W	0.790534	0.716877	1.10275	14.9579	15.6182	1.04414	3.96516	0.0623178	0.141101
YMR239C	RNT1	0.861289	0.781085	1.10268	9.73386	6.60246	0.678298	2.723	-0.560009	0.141019
YLR059C	REX2	1.08028	0.979828	1.10252	33.7431	28.9701	0.85855	4.85649	-0.220026	0.140807
YGL196W	YGL196W	0.88657	0.804174	1.10246	26.5998	27.9297	1.05	4.80373	0.0703864	0.140726
YPR004C	YPR004C	1.13761	1.03199	1.10234	20.4402	18.9351	0.926363	4.24299	-0.11035	0.140568
YAL034C	FUN19	1.24523	1.12965	1.10232	18.4717	23.1118	1.2512	4.53056	0.323317	0.140542
YHR080C	YHR080C	1.02667	0.93138	1.10231	12.087	16.2574	1.34503	4.02302	0.427642	0.140527
YJR111C	YJR111C	0.945064	0.857357	1.1023	14.4029	57.2287	3.97341	5.83867	1.99038	0.140517
YJR112W	NNF1	0.945064	0.857357	1.1023	14.6045	11.6216	0.795759	3.53874	-0.329596	0.140517
YOR357C	SNX3	1.25163	1.13557	1.1022	25.0998	23.4896	0.93585	4.55395	-0.0956505	0.140393
YNR066C	YNR066C	0.955402	0.866911	1.10208	8.13313	14.6426	1.80036	3.8721	0.848288	0.140223
YLR165C	PUS5	1.03034	0.934939	1.10203	17.8806	22.4677	1.25654	4.48978	0.329459	0.14017
YOL097C	WRS1	0.788088	0.715123	1.10203	26.2076	28.6861	1.09457	4.84228	0.13037	0.140166
YMR029C	FAR8	1.26216	1.14531	1.10202	14.0775	16.7405	1.18917	4.06527	0.249954	0.140155
YBL029C-A	YBL029C-A	0.331844	0.301126	1.10201	33.1863	30.9418	0.932364	4.95148	-0.101034	0.140141
YPL274W	SAM3	0.512265	0.464855	1.10199	39.6272	74.4684	1.87923	6.21856	0.910139	0.14011
YOR329C	SCD5	0.880784	0.79945	1.10174	15.1918	17.3411	1.14147	4.11612	0.190899	0.13978
YNL301C	RPL18B	0.564015	0.511966	1.10166	90.6207	60.5672	0.668359	5.92047	-0.581304	0.139685
YMR002W	MIC17	0.83458	0.757621	1.10158	46.9063	40.0046	0.852863	5.32209	-0.229615	0.139574
YDR364C	CDC40	0.823913	0.747943	1.10157	15.3126	11.3017	0.738068	3.49847	-0.438175	0.139563
YMR065W	KAR5	0.778985	0.707185	1.10153	15.1345	19.7746	1.30659	4.30558	0.385809	0.139507
YPR029C	APL4	1.01222	0.919048	1.10138	19.5619	19.1197	0.977396	4.25699	-0.0329848	0.139309
YLR149C	YLR149C	0.485767	0.441112	1.10123	9.59973	17.1314	1.78457	4.09857	0.835573	0.13912
YLR150W	STM1	0.485767	0.441112	1.10123	64.7397	50.419	0.778795	5.6559	-0.360684	0.13912
YBR095C	RXT2	0.996527	0.904929	1.10122	15.3175	13.8035	0.901164	3.78697	-0.150139	0.139105
YBR096W	YBR096W	0.996527	0.904929	1.10122	21.7567	20.9895	0.964739	4.3916	-0.0517898	0.139105
YOR021C	YOR021C	0.721125	0.654938	1.10106	16.5112	10.4476	0.632757	3.3851	-0.660277	0.138891
YKL029C	MAE1	0.580893	0.527602	1.101	25.9079	30.3557	1.17168	4.9239	0.228575	0.138821
YIL007C	NAS2	1.16343	1.05674	1.10096	13.1561	11.5694	0.879395	3.53225	-0.185417	0.138762
YPR074C	TKL1	0.744167	0.675947	1.10093	61.7589	49.8937	0.807878	5.64078	-0.307791	0.138717
YIL077C	YIL077C	1.06418	0.96666	1.10089	22.7514	32.4556	1.42653	5.02039	0.512509	0.138664
YAL044C	GCV3	1.19131	1.08218	1.10084	27.2517	48.3044	1.77253	5.59408	0.82581	0.1386
YLR223C	IFH1	0.717296	0.651615	1.1008	16.841	11.1114	0.659782	3.47396	-0.599938	0.13855
YGR235C	YGR235C	0.794579	0.72186	1.10074	22.1144	17.3289	0.783606	4.11511	-0.3518	0.138472
YGR037C	ACB1	0.94374	0.857405	1.10069	44.3038	39.7353	0.896884	5.31235	-0.157007	0.138413
YDR421W	ARO80	0.846618	0.769173	1.10069	8.65906	12.8723	1.48657	3.6862	0.571985	0.138402
YPL192C	PRM3	0.828206	0.752476	1.10064	17.8813	13.8454	0.774298	3.79134	-0.369039	0.138343
YHR090C	YNG2	0.968287	0.879843	1.10052	19.286	21.0178	1.0898	4.39354	0.124059	0.13819
YGL029W	CGR1	0.780492	0.709232	1.10047	23.5759	16.4468	0.697611	4.03973	-0.519505	0.138125
YNL270C	ALP1	0.698006	0.634301	1.10043	5.59933	4.04425	0.722274	2.01587	-0.469382	0.138071
YKR010C	TOF2	0.77491	0.704264	1.10031	18.5017	8.2123	0.443867	3.03779	-1.1718	0.137913
YOL156W	HXT11	0.766604	0.696866	1.10007	4.95125	4.22668	0.853659	2.07952	-0.228269	0.1376
YHR048W	YHR048W	0.975235	0.886588	1.09999	11.149	11.8218	1.06035	3.56338	0.0845433	0.137485
YIL134W	FLX1	0.823036	0.748274	1.09991	40.556	41.6126	1.02605	5.37895	0.0371054	0.137388
YLR238W	FAR10	0.975088	0.886606	1.0998	11.7095	12.187	1.04078	3.60727	0.0576719	0.13724
YPL111W	CAR1	0.524114	0.476574	1.09975	23.3595	16.3076	0.698112	4.02747	-0.51847	0.137179
YNL247W	YNL247W	0.888568	0.808001	1.09971	17.9834	12.3492	0.686697	3.62634	-0.542254	0.137126
YNL248C	RPA49	0.888568	0.808001	1.09971	17.8835	7.56733	0.423145	2.91978	-1.24078	0.137126
YDR140W	MTQ2	0.939386	0.854243	1.09967	23.7496	19.6838	0.828807	4.29894	-0.270891	0.137071
YDR139C	RUB1	0.939386	0.854243	1.09967	18.1495	15.6603	0.862848	3.96904	-0.212822	0.137071
YBR296C	PHO89	0.644665	0.58629	1.09957	4.54493	3.40075	0.748252	1.76586	-0.418403	0.136933
YLR272C	YCS4	0.942052	0.856783	1.09952	11.584	8.68355	0.749618	3.11828	-0.415773	0.136877
YOR239W	ABP140	0.98082	0.892071	1.09949	19.0971	14.4579	0.757076	3.85379	-0.40149	0.136829
YGR261C	APL6	0.994495	0.904568	1.09941	12.5029	12.5506	1.00382	3.64968	0.00549533	0.136734
YDR506C	YDR506C	0.608328	0.553333	1.09939	11.8184	8.73936	0.739471	3.12753	-0.435435	0.136701
YMR109W	MYO5	0.602578	0.548108	1.09938	23.1128	24.5255	1.06112	4.61621	0.0855916	0.136688
YGR013W	SNU71	1.03539	0.941798	1.09937	20.9852	19.1211	0.911171	4.25709	-0.134206	0.136678
YIL120W	QDR1	1.30457	1.18665	1.09937	25.5059	19.1104	0.749253	4.25629	-0.416475	0.136677
YOR005C	DNL4	0.775936	0.705864	1.09927	10.4964	10.8297	1.03176	3.43693	0.045101	0.136547
YHR146W	CRP1	0.820093	0.746038	1.09926	15.5343	12.6849	0.816576	3.66504	-0.292341	0.136538
YOR305W	YOR305W	1.03982	0.945955	1.09922	19.0186	17.9432	0.943457	4.16537	-0.0839709	0.136486
YOR304C-A	YOR304C-A	1.03982	0.945955	1.09922	20.6033	14.0604	0.682435	3.81356	-0.551237	0.136486
YJL193W	YJL193W	1.18712	1.08001	1.09918	17.7295	17.672	0.996756	4.14339	-0.0046875	0.136422
YPL086C	ELP3	0.854747	0.777659	1.09913	13.4286	6.69188	0.498329	2.74241	-1.00483	0.13636
YNR049C	MSO1	0.998012	0.908018	1.09911	17.2142	17.778	1.03275	4.15202	0.0464901	0.136335
YKL210W	UBA1	0.901839	0.820618	1.09898	28.7223	24.2335	0.843716	4.59893	-0.245171	0.136159
YPL128C	TBF1	0.638112	0.580673	1.09892	15.8295	12.2899	0.776388	3.6194	-0.36515	0.136085
YGR006W	PRP18	1.35045	1.22901	1.09881	24.6645	22.5732	0.91521	4.49654	-0.127825	0.135936
YGR005C	TFG2	1.35045	1.22901	1.09881	12.9743	10.7558	0.829007	3.42704	-0.270543	0.135936
YJL201W	ECM25	0.934782	0.850746	1.09878	20.9017	24.7334	1.18332	4.62839	0.242842	0.135902
YKL166C	TPK3	0.504307	0.458987	1.09874	16.6954	13.4797	0.80739	3.75271	-0.308663	0.13585
YGL054C	ERV14	0.518388	0.471877	1.09857	31.0104	30.7812	0.992607	4.94398	-0.0107053	0.135621
YGL043W	DST1	0.938543	0.85435	1.09855	17.9383	15.7927	0.880392	3.98119	-0.183783	0.135596
YGL044C	RNA15	0.938543	0.85435	1.09855	13.1764	16.2641	1.23434	4.02362	0.303736	0.135596
YIL161W	YIL161W	0.576481	0.524803	1.09847	10.3625	12.4512	1.20157	3.63821	0.264915	0.135495
YGR147C	NAT2	0.618392	0.56298	1.09843	20.7544	17.0369	0.820882	4.09059	-0.284754	0.135439
YLR351C	NIT3	1.32629	1.2075	1.09838	22.2642	27.4734	1.23397	4.77996	0.303308	0.135381
YPR047W	MSF1	0.887169	0.807814	1.09823	11.5869	12.5282	1.08124	3.64711	0.112683	0.135186
YDR485C	VPS72	0.883788	0.804786	1.09816	13.065	12.3637	0.946322	3.62804	-0.0795969	0.135094
YOL027C	MDM38	1.13572	1.03437	1.09798	21.8568	31.4198	1.43753	4.9736	0.523588	0.134853
YIL066C	RNR3	1.02021	0.929273	1.09786	4.39893	6.2342	1.41721	2.6402	0.50305	0.134696
YGL114W	YGL114W	1.06361	0.968991	1.09764	12.4066	21.3161	1.71812	4.41387	0.780834	0.13441
YBR240C	THI2	0.893622	0.814178	1.09758	6.03569	8.77538	1.45391	3.13346	0.539942	0.134321
YPR067W	ISA2	1.00896	0.919362	1.09746	19.591	28.1885	1.43886	4.81704	0.524921	0.134167
YNL040W	YNL040W	1.22339	1.11476	1.09745	9.84858	11.8291	1.2011	3.56427	0.264351	0.134154
YPL258C	THI21	0.57746	0.526296	1.09721	12.5238	9.11226	0.727594	3.18781	-0.458795	0.133845
YOR386W	PHR1	1.04436	0.951854	1.09718	9.99295	15.5621	1.55731	3.95996	0.639054	0.133806
YBL082C	ALG3	1.03867	0.946676	1.09718	9.15858	5.745	0.627281	2.52231	-0.672816	0.133797
YBL081W	YBL081W	1.03867	0.946676	1.09718	19.7535	13.0344	0.659855	3.70426	-0.599778	0.133797
YOR123C	LEO1	1.03011	0.938914	1.09713	18.3136	15.7469	0.859845	3.977	-0.217851	0.133731
YMR261C	TPS3	1.23602	1.12662	1.09711	15.3003	24.0947	1.57478	4.59064	0.655153	0.133711
YMR262W	YMR262W	1.23602	1.12662	1.09711	15.4162	21.8855	1.41964	4.45191	0.505529	0.133711
YEL055C	POL5	0.820859	0.748202	1.09711	22.9808	15.4255	0.671237	3.94725	-0.575107	0.133706
YNL200C	YNL200C	0.770316	0.702149	1.09708	11.562	18.5099	1.60093	4.21023	0.678907	0.133672
YPR075C	OPY2	1.11264	1.01421	1.09705	14.817	12.2013	0.823471	3.60897	-0.280211	0.133634
YDL183C	YDL183C	1.01905	0.92904	1.09689	10.2136	22.995	2.2514	4.52325	1.17082	0.133413
YLR036C	YLR036C	0.897112	0.817908	1.09684	14.9616	16.7332	1.11841	4.06464	0.16145	0.133349
YNL059C	ARP5	1.16711	1.06421	1.09669	13.3446	13.6499	1.02288	3.77082	0.0326369	0.133158
YPR062W	FCY1	1.02709	0.936598	1.09661	34.5591	28.7229	0.831124	4.84413	-0.266864	0.133054
YPR061C	JID1	1.02709	0.936598	1.09661	19.8097	17.1209	0.86427	4.09769	-0.210446	0.133054
YHR098C	SFB3	1.15356	1.05199	1.09656	22.8891	16.2139	0.70837	4.01916	-0.497424	0.13298
YIR021W	MRS1	1.02476	0.934592	1.09648	17.1768	15.1853	0.884056	3.9246	-0.177791	0.132878
YBR164C	ARL1	0.671034	0.612038	1.09639	18.7819	18.7603	0.998851	4.22961	-0.00165819	0.132764
YBR165W	UBS1	0.671034	0.612038	1.09639	16.5888	34.2734	2.06606	5.09902	1.04688	0.132764
YBL005W	PDR3	1.18109	1.07734	1.0963	23.4903	29.6219	1.26103	4.88859	0.334598	0.132647
YBL006C	LDB7	1.18109	1.07734	1.0963	18.9231	16.1043	0.851036	4.00937	-0.232708	0.132647
YHR005C-A	MRS11	0.69137	0.630716	1.09617	99.8264	96.7266	0.968948	6.59584	-0.0455092	0.132466
YMR155W	YMR155W	1.00194	0.91404	1.09616	12.582	12.7103	1.0102	3.66793	0.0146393	0.132464
YJL050W	MTR4	0.682547	0.62267	1.09616	15.3442	10.4298	0.679723	3.38264	-0.556981	0.132461
YML115C	VAN1	0.879909	0.802735	1.09614	20.834	15.8428	0.760432	3.98576	-0.395109	0.13243
YDL238C	GUD1	1.0797	0.985053	1.09608	11.4788	16.8496	1.46788	4.07464	0.553737	0.132353
YDL237W	YDL237W	1.0797	0.985053	1.09608	15.1737	15.8424	1.04406	3.98572	0.0622112	0.132353
YPL249C-A	RPL36B	0.690888	0.630357	1.09603	118.852	114.368	0.962272	6.83753	-0.055484	0.132284
YDR323C	PEP7	1.01115	0.922772	1.09578	11.3102	10.9124	0.964827	3.4479	-0.0516577	0.131955
YJL141C	YAK1	0.579569	0.528956	1.09569	23.7762	37.8965	1.59388	5.24399	0.672542	0.131834
YJL140W	RPB4	0.579569	0.528956	1.09569	38.5265	45.3742	1.17774	5.5038	0.236022	0.131834
YPL203W	TPK2	0.603882	0.55116	1.09566	12.5419	14.7465	1.17578	3.8823	0.233616	0.131795
YBR299W	MAL32	0.673432	0.614643	1.09565	12.2212	10.7089	0.876257	3.42074	-0.190575	0.131784
YBR298C	MAL31	0.673432	0.614643	1.09565	11.8693	9.32649	0.785766	3.22133	-0.347828	0.131784
YNL026W	SAM50	0.778484	0.710554	1.0956	15.164	15.1446	0.998723	3.92073	-0.00184364	0.131724
YJL053W	PEP8	0.779841	0.711815	1.09557	16.2619	22.0683	1.35706	4.4639	0.440484	0.131677
YOR336W	KRE5	1.10199	1.00593	1.09549	9.70209	18.1858	1.87442	4.18474	0.906446	0.131579
YLR264W	RPS28B	0.72955	0.665964	1.09548	87.9503	53.6318	0.609797	5.74502	-0.713599	0.131562
YNL222W	SSU72	1.03282	0.942862	1.09541	41.7851	39.3015	0.940561	5.29651	-0.0884061	0.131477
YOL010W	RCL1	0.888445	0.811091	1.09537	20.4099	11.4679	0.561878	3.51953	-0.831672	0.131419
YDR328C	SKP1	1.09219	0.997114	1.09535	16.8924	16.3298	0.966699	4.02944	-0.0488616	0.131392
YLR450W	HMG2	0.912217	0.832905	1.09522	17.5727	31.2698	1.77945	4.9667	0.831432	0.131225
YIL102C	YIL102C	0.481235	0.439423	1.09515	21.2921	18.4982	0.868784	4.20931	-0.20293	0.131131
YDR479C	PEX29	1.14865	1.04887	1.09513	21.8842	24.01	1.09714	4.58557	0.133747	0.131105
YJL174W	KRE9	1.09885	1.00341	1.09512	27.9136	26.0981	0.934961	4.70588	-0.0970219	0.131091
YNR028W	CPR8	0.59404	0.542447	1.09511	18.6262	12.7255	0.683207	3.66965	-0.549605	0.131076
YDR419W	RAD30	1.16222	1.06139	1.095	9.20778	9.36992	1.01761	3.22804	0.0251826	0.13093
YMR180C	CTL1	0.603779	0.551415	1.09496	32.3451	32.3919	1.00145	5.01756	0.0020856	0.130884
YBL056W	PTC3	0.914957	0.83562	1.09494	32.4795	29.873	0.919748	4.90077	-0.12069	0.130856
YBL057C	PTH2	0.914957	0.83562	1.09494	20.7578	22.1366	1.06642	4.46836	0.0927814	0.130856
YKL183W	LOT5	0.658112	0.601115	1.09482	28.1437	21.251	0.755089	4.40946	-0.405282	0.130693
YOL041C	NOP12	0.678898	0.620111	1.0948	21.1029	13.6186	0.645345	3.76751	-0.631858	0.130669
YDL080C	THI3	1.14905	1.04962	1.09474	20.1688	18.3408	0.909363	4.19698	-0.137071	0.130586
YOR229W	WTM2	0.953719	0.871195	1.09473	8.90145	11.4126	1.28211	3.51256	0.358518	0.130569
YOR228C	YOR228C	0.953719	0.871195	1.09473	9.19997	11.9292	1.29666	3.57643	0.374798	0.130569
YKL001C	MET14	1.02115	0.932935	1.09455	15.7687	19.4959	1.23637	4.2851	0.306112	0.130344
YEL043W	YEL043W	1.09429	0.999795	1.09451	15.6901	14.1078	0.899152	3.81842	-0.153363	0.13029
YOR128C	ADE2	0.760508	0.694939	1.09435	17.6426	30.3229	1.71873	4.92234	0.781341	0.130077
YML093W	UTP14	0.961296	0.878448	1.09431	15.461	7.27751	0.470702	2.86344	-1.08712	0.130025
YJR150C	DAN1	0.928499	0.848557	1.09421	2.89539	4.51911	1.56079	2.17604	0.642278	0.129889
YNL079C	TPM1	0.642331	0.587066	1.09414	32.5263	24.8809	0.764948	4.63697	-0.386566	0.129793
YKR099W	BAS1	0.532454	0.486669	1.09408	11.1217	13.1577	1.18307	3.71783	0.242531	0.129716
YKR098C	UBP11	0.532454	0.486669	1.09408	8.44116	9.86037	1.16813	3.30164	0.224201	0.129716
YOR297C	TIM18	0.929945	0.849986	1.09407	20.3375	19.2643	0.947234	4.26786	-0.0782071	0.129706
YOR298W	MUM3	0.929945	0.849986	1.09407	28.8602	27.5121	0.953288	4.78199	-0.0690155	0.129706
YJR054W	YJR054W	0.847627	0.774773	1.09403	17.854	14.0387	0.786306	3.81134	-0.346838	0.129655
YOR390W	YOR390W	0.642426	0.587279	1.0939	17.3341	14.21	0.819772	3.82884	-0.286705	0.129483
YMR290C	HAS1	0.682381	0.623808	1.0939	20.5268	8.6538	0.421586	3.11333	-1.2461	0.129476
YGR194C	XKS1	1.14727	1.0489	1.09378	16.2409	18.452	1.13614	4.2057	0.184143	0.129317
YJL101C	GSH1	1.02859	0.940411	1.09376	15.9593	18.2539	1.14378	4.19013	0.193808	0.1293
YJL100W	LSB6	1.02859	0.940411	1.09376	13.1292	16.4027	1.24932	4.03586	0.321147	0.1293
YFR016C	YFR016C	0.701002	0.640984	1.09363	11.3519	10.4893	0.92401	3.39084	-0.114019	0.129131
YER157W	COG3	1.19908	1.09652	1.09353	14.6782	12.9846	0.884617	3.69872	-0.176875	0.128999
YIL063C	YRB2	0.98849	0.903961	1.09351	17.8628	17.1877	0.962207	4.10331	-0.0555815	0.128965
YCR037C	PHO87	0.78125	0.714449	1.0935	13.7682	12.0364	0.874214	3.58933	-0.193942	0.128954
YER060W	FCY21	0.767509	0.701972	1.09336	17.9795	26.5575	1.4771	4.73105	0.562765	0.12877
YDR408C	ADE8	1.01498	0.928339	1.09333	29.5164	32.664	1.10664	5.02963	0.146187	0.128723
YEL003W	GIM4	0.871074	0.796739	1.0933	26.0235	17.4725	0.671409	4.12701	-0.574735	0.128689
YPR060C	ARO7	0.612012	0.559795	1.09328	21.8607	18.6669	0.853904	4.22241	-0.227853	0.12866
YJL126W	NIT2	0.976939	0.893684	1.09316	11.586	10.5916	0.914173	3.40485	-0.129461	0.128503
YJL127C	SPT10	0.976939	0.893684	1.09316	14.0154	21.1071	1.50599	4.39966	0.590713	0.128503
YDR175C	RSM24	1.12685	1.03085	1.09313	17.4988	15.0386	0.859406	3.9106	-0.218588	0.128465
YDR176W	NGG1	1.12685	1.03085	1.09313	20.121	15.008	0.745888	3.90766	-0.422969	0.128465
YNL078W	NIS1	0.651902	0.596366	1.09312	34.7296	35.6559	1.02667	5.15607	0.0379735	0.128457
YJR042W	NUP85	0.964863	0.88268	1.09311	15.3628	14.5699	0.948389	3.86492	-0.0764485	0.128434
YJR041C	URB2	0.964863	0.88268	1.09311	13.2035	9.38861	0.71107	3.23091	-0.491937	0.128434
YHR013C	ARD1	0.905268	0.828211	1.09304	21.7883	17.487	0.802587	4.12821	-0.31727	0.128346
YHR014W	SPO13	0.905268	0.828211	1.09304	7.66033	6.37383	0.832057	2.67216	-0.265245	0.128346
YOL159C-A	YOL159C-A	1.10959	1.01518	1.093	15.4304	15.5749	1.00937	3.96115	0.0134505	0.12829
YOR226C	ISU2	0.771905	0.706232	1.09299	37.4832	41.9749	1.11983	5.39146	0.163285	0.128281
YLR299W	ECM38	0.764947	0.699909	1.09292	15.0766	14.8887	0.987539	3.89615	-0.0180903	0.128192
YLR197W	SIK1	0.7219	0.660543	1.09289	35.4998	18.8027	0.529656	4.23287	-0.916872	0.128147
YKR083C	DAD2	0.689548	0.630965	1.09285	18.2328	13.0866	0.717753	3.71002	-0.478441	0.128092
YMR298W	LIP1	0.845931	0.774075	1.09283	22.9894	21.4575	0.933364	4.42341	-0.0994885	0.128066
YJL170C	ASG7	0.858754	0.785813	1.09282	18.0215	47.5135	2.63649	5.57027	1.39862	0.128059
YER109C	FLO8	1.11249	1.01803	1.0928	13.6928	9.74447	0.711652	3.28458	-0.490757	0.128023
YML108W	YML108W	0.734688	0.672332	1.09274	20.0421	15.1331	0.755067	3.91964	-0.405324	0.127956
YKL042W	SPC42	0.624515	0.571534	1.0927	13.1579	13.9819	1.06263	3.80549	0.0876366	0.127898
YJR052W	RAD7	0.660977	0.604909	1.09269	11.8061	10.945	0.927066	3.45221	-0.109255	0.127881
YMR163C	YMR163C	0.63286	0.57918	1.09268	12.1102	7.36289	0.60799	2.88027	-0.717881	0.127876
YNL067W	RPL9B	0.79842	0.730729	1.09263	239.282	179.3	0.749326	7.48623	-0.416335	0.127811
YOL051W	GAL11	0.981374	0.898234	1.09256	17.5601	14.2861	0.813556	3.83654	-0.297687	0.127712
YKR028W	SAP190	0.748493	0.685084	1.09256	20.7191	19.5244	0.942338	4.28721	-0.0856836	0.127708
YLR424W	SPP382	0.975579	0.892935	1.09255	8.19989	6.48597	0.790982	2.69732	-0.338283	0.127704
YLR423C	ATG17	0.975579	0.892935	1.09255	9.33292	8.42913	0.903161	3.07538	-0.146946	0.127704
YMR313C	TGL3	0.815245	0.746237	1.09247	16.6128	19.0063	1.14408	4.24841	0.19419	0.127599
YMR314W	PRE5	0.815245	0.746237	1.09247	32.052	23.4135	0.730486	4.54927	-0.453072	0.127599
YGL234W	ADE5,7	0.843673	0.772302	1.09241	18.3448	16.741	0.912576	4.06532	-0.131983	0.127517
YGL236C	MTO1	0.843673	0.772302	1.09241	10.916	12.0974	1.10823	3.59663	0.148257	0.127517
YNL261W	ORC5	0.70054	0.641284	1.0924	20.4725	18.2418	0.891038	4.18918	-0.166441	0.127505
YDR012W	RPL4B	0.739684	0.677141	1.09236	90.5617	52.3263	0.577797	5.70947	-0.791365	0.127451
YJL146W	IDS2	1.00535	0.920351	1.09236	16.1651	15.0084	0.928449	3.9077	-0.107106	0.127447
YIL014C-A	YIL014C-A	0.638698	0.584738	1.09228	7.58947	15.9767	2.10511	3.9979	1.0739	0.127345
YIL014W	MNT3	0.638698	0.584738	1.09228	13.4986	12.2773	0.909528	3.61793	-0.136809	0.127345
YKL207W	YKL207W	1.27666	1.16893	1.09216	22.6257	24.453	1.08076	4.61194	0.112046	0.12718
YML068W	ITT1	0.717136	0.656663	1.09209	13.0636	15.0577	1.15265	3.91243	0.204957	0.127093
YML114C	TAF8	1.12964	1.03443	1.09204	20.6354	14.6756	0.711184	3.87534	-0.491705	0.12703
YBR185C	MBA1	0.991654	0.90814	1.09196	11.1207	15.2063	1.36739	3.9266	0.451426	0.126923
YEL032W	MCM3	0.404545	0.37052	1.09183	20.0139	14.2114	0.71008	3.82898	-0.493947	0.126749
YPR025C	CCL1	0.997686	0.913825	1.09177	15.3807	15.9835	1.03919	3.99851	0.0554632	0.126668
YPL090C	RPS6A	0.353256	0.323586	1.09169	80.192	66.691	0.831642	6.05942	-0.265965	0.126568
YIL078W	THS1	0.750711	0.687662	1.09169	32.0374	27.9967	0.873876	4.80718	-0.1945	0.126558
YDL217C	TIM22	0.893916	0.818873	1.09164	19.3105	18.5591	0.961091	4.21406	-0.0572544	0.126501
YJL134W	LCB3	0.984941	0.902259	1.09164	19.6295	22.8046	1.16175	4.51125	0.216297	0.126495
YJR124C	YJR124C	0.78976	0.723477	1.09162	19.7116	14.8412	0.752916	3.89153	-0.409439	0.126466
YDL168W	SFA1	0.811343	0.743264	1.09159	10.5147	15.1185	1.43784	3.91824	0.523901	0.126436
YGL231C	YGL231C	0.994873	0.911437	1.09154	16.4496	17.7416	1.07854	4.14906	0.109086	0.12637
YDR069C	DOA4	0.903348	0.827616	1.09151	12.3351	20.4114	1.65474	4.35131	0.726606	0.12632
YBR251W	MRPS5	0.881806	0.807897	1.09148	16.4651	17.257	1.0481	4.10911	0.0677718	0.126289
YKR039W	GAP1	1.06746	0.978019	1.09145	14.0029	14.2266	1.01598	3.83052	0.0228667	0.126249
YDL122W	UBP1	0.650003	0.59567	1.09121	22.0567	16.0549	0.72789	4.00494	-0.458208	0.125932
YCR063W	BUD31	1.11332	1.02027	1.0912	41.2051	19.993	0.485207	4.32142	-1.04333	0.12591
YER015W	FAA2	1.05717	0.968979	1.09101	8.62454	7.62255	0.883821	2.93027	-0.178174	0.125669
YPL007C	TFC8	1.05608	0.968017	1.09098	11.8739	10.1435	0.854268	3.34248	-0.227239	0.12562
YAL060W	BDH1	0.931162	0.853513	1.09098	31.8885	43.7247	1.37117	5.45038	0.45541	0.125619
YOL043C	NTG2	1.06582	0.976946	1.09097	11.3816	11.1825	0.982499	3.48316	-0.0254724	0.125615
YOL042W	NGL1	1.06582	0.976946	1.09097	12.2249	15.4315	1.2623	3.94781	0.33605	0.125615
YDR222W	YDR222W	0.702815	0.644255	1.0909	33.162	20.2702	0.611248	4.34129	-0.71017	0.125513
YCL028W	RNQ1	1.52832	1.40108	1.09082	13.0776	13.7515	1.05153	3.78152	0.0724919	0.125409
YCL029C	BIK1	1.52832	1.40108	1.09082	17.3258	23.2201	1.34021	4.5373	0.422456	0.125409
YDL193W	NUS1	0.654138	0.599679	1.09081	21.9675	19.1544	0.87194	4.2596	-0.197699	0.125406
YMR303C	ADH2	0.675202	0.619013	1.09077	19.2014	18.9568	0.987261	4.24464	-0.0184965	0.125351
YMR304W	UBP15	0.675202	0.619013	1.09077	13.2089	15.5646	1.17834	3.96019	0.23675	0.125351
YGL122C	NAB2	0.951482	0.872387	1.09067	36.166	27.5014	0.76042	4.78143	-0.395132	0.125208
YCR072C	RSA4	0.80785	0.740768	1.09056	14.9459	7.28085	0.487147	2.86411	-1.03757	0.125066
YDR025W	RPS11A	0.426219	0.390837	1.09053	110.857	92.1003	0.830804	6.52513	-0.267419	0.125027
YAL027W	YAL027W	1.04331	0.956843	1.09037	12.5717	17.4702	1.38965	4.12683	0.474718	0.124817
YOR241W	MET7	0.821525	0.753442	1.09036	20.8902	18.3974	0.880671	4.20143	-0.183325	0.124807
YNL208W	YNL208W	0.802383	0.735891	1.09035	27.565	46.7472	1.69589	5.54681	0.762039	0.124798
YBR131W	CCZ1	1.15066	1.05537	1.09029	11.1397	13.7896	1.23788	3.78551	0.30787	0.124713
YBR130C	SHE3	1.15066	1.05537	1.09029	21.1997	19.3975	0.914989	4.2778	-0.128173	0.124713
YMR148W	YMR148W	0.998479	0.915824	1.09025	31.0321	31.2277	1.0063	4.96475	0.00906544	0.124661
YLR082C	SRL2	0.808105	0.741222	1.09023	12.1123	13.0949	1.08112	3.71093	0.112525	0.124637
YHL017W	YHL017W	1.13314	1.03939	1.0902	15.1343	15.6473	1.03389	3.96784	0.0480855	0.124588
YDR028C	REG1	0.855144	0.784428	1.09015	18.3152	19.0968	1.04267	4.25526	0.0602875	0.124525
YHR104W	GRE3	0.616853	0.56591	1.09002	24.9486	39.9977	1.6032	5.32184	0.680957	0.124354
YLR108C	YLR108C	0.607504	0.557398	1.08989	32.9184	23.6248	0.717677	4.56223	-0.478594	0.124185
YKL026C	GPX1	0.986741	0.905371	1.08987	17.1063	21.2572	1.24266	4.40988	0.313428	0.124162
YDR387C	YDR387C	1.16307	1.06717	1.08987	12.0812	15.2109	1.25905	3.92703	0.33234	0.124152
YDR388W	RVS167	1.16307	1.06717	1.08987	17.8423	20.7401	1.16241	4.37435	0.217124	0.124152
YKL205W	LOS1	1.04105	0.95521	1.08986	15.9282	15.503	0.973309	3.95448	-0.03903	0.124145
YKL206C	ADD66	1.04105	0.95521	1.08986	21.9205	26.6969	1.2179	4.7386	0.284393	0.124145
YER050C	RSM18	1.1236	1.03103	1.08979	15.0017	20.9151	1.39418	4.38647	0.479416	0.124045
YER051W	JHD1	1.1236	1.03103	1.08979	10.2823	27.5672	2.68102	4.78488	1.42278	0.124045
YOR009W	TIR4	1.05559	0.968808	1.08958	7.77222	5.17785	0.666199	2.37235	-0.585974	0.123768
YLR188W	MDL1	0.955812	0.877241	1.08957	9.78597	8.9412	0.913675	3.16047	-0.130247	0.123754
YOR358W	HAP5	1.4139	1.29775	1.0895	19.5951	14.8341	0.75703	3.89084	-0.401577	0.123665
YJL206C	YJL206C	1.12059	1.02854	1.08949	9.95323	9.86173	0.990807	3.30184	-0.0133246	0.123654
YNL305C	YNL305C	1.02451	0.940425	1.08942	20.1039	25.4178	1.26432	4.66777	0.338365	0.123555
YBL107C	YBL107C	0.90238	0.828396	1.08931	15.7754	11.841	0.7506	3.56572	-0.413885	0.123414
YBR194W	SOY1	1.04772	0.961868	1.08926	21.6566	18.5012	0.854299	4.20955	-0.227187	0.123348
YBR193C	MED8	1.04772	0.961868	1.08926	21.2635	15.5254	0.730146	3.95656	-0.453743	0.123348
YOR296W	YOR296W	0.938785	0.861885	1.08922	10.9305	11.421	1.04488	3.51362	0.0633308	0.1233
YNR072W	HXT17	0.81897	0.751897	1.08921	8.71556	15.5938	1.78919	3.9629	0.839307	0.123276
YKL208W	CBT1	0.922729	0.847168	1.08919	9.74695	13.4017	1.37497	3.74435	0.459397	0.12326
YOR075W	UFE1	1.29597	1.18985	1.08919	14.006	12.7411	0.909688	3.67142	-0.136557	0.123258
YML092C	PRE8	0.604971	0.555446	1.08916	24.8408	17.3308	0.697674	4.11527	-0.519375	0.123221
YBR007C	DSF2	1.00176	0.919791	1.08912	11.5819	11.7752	1.01669	3.55768	0.0238826	0.123159
YOR350C	MNE1	0.928631	0.85265	1.08911	11.0585	10.5296	0.952167	3.39637	-0.0707128	0.123152
YOR054C	VHS3	0.800758	0.735267	1.08907	17.4705	20.0521	1.14777	4.32568	0.19883	0.123099
YDL013W	HEX3	0.805093	0.739292	1.08901	15.6077	14.6675	0.939761	3.87455	-0.0896349	0.123011
YGR209C	TRX2	0.999745	0.918042	1.089	56.9999	55.1459	0.967474	5.78518	-0.0477052	0.123
YOR178C	GAC1	0.58241	0.534827	1.08897	15.6385	10.9602	0.700846	3.4542	-0.51283	0.122963
YPL228W	CET1	0.812847	0.746463	1.08893	16.9808	17.3505	1.02177	4.11691	0.0310699	0.122912
YLR254C	NDL1	0.938819	0.862198	1.08887	19.3664	18.8721	0.974473	4.23818	-0.0373052	0.122829
YDL156W	YDL156W	0.963847	0.885203	1.08884	12.8373	8.81957	0.687028	3.14071	-0.541559	0.122797
YDL157C	YDL157C	0.963847	0.885203	1.08884	12.9817	15.8518	1.22109	3.98658	0.288169	0.122797
YEL009C	GCN4	0.401819	0.369034	1.08884	150.963	113.177	0.749699	6.82244	-0.415617	0.122792
YCL051W	LRE1	1.20753	1.10912	1.08872	13.5279	14.4842	1.07069	3.85641	0.0985453	0.122632
YCL052C	PBN1	1.20753	1.10912	1.08872	13.2546	15.8305	1.19434	3.98463	0.256209	0.122632
YCR044C	PER1	1.0852	0.996854	1.08863	25.0443	18.0222	0.719613	4.17171	-0.474706	0.122511
YER177W	BMH1	0.418461	0.384408	1.08859	97.962	70.5286	0.719959	6.14014	-0.474014	0.122455
YKR046C	PET10	0.697621	0.6409	1.0885	21.7066	22.8369	1.05207	4.51329	0.0732293	0.122344
YBR173C	UMP1	1.16701	1.07214	1.08849	30.0982	19.739	0.655819	4.30298	-0.608629	0.122332
YBR175W	SWD3	1.16701	1.07214	1.08849	15.4656	16.4119	1.06118	4.03667	0.0856741	0.122332
YKL161C	YKL161C	0.921874	0.846932	1.08849	10.0064	8.46797	0.846257	3.08202	-0.240831	0.122324
YCR045C	YCR045C	0.883997	0.812161	1.08845	15.2084	11.2595	0.740346	3.49307	-0.433728	0.122275
YOR327C	SNC2	0.685641	0.629949	1.08841	44.2931	38.096	0.860089	5.25157	-0.217442	0.12222
YNL048W	ALG11	1.50229	1.38028	1.0884	14.6993	11.9816	0.815114	3.58275	-0.294926	0.122202
YNL049C	SFB2	1.50229	1.38028	1.0884	11.9095	11.9041	0.999546	3.57339	-0.000654856	0.122202
YGR126W	YGR126W	0.981539	0.901834	1.08838	21.7606	22.7641	1.04612	4.50869	0.0650432	0.122184
YAL039C	CYC3	0.842757	0.774398	1.08827	18.0944	17.8806	0.988188	4.16032	-0.017143	0.122041
YIR004W	DJP1	0.6855	0.629899	1.08827	15.1461	14.3728	0.948947	3.84527	-0.0756	0.122037
YBL024W	NCL1	0.847105	0.77845	1.08819	22.5895	16.2802	0.7207	4.02505	-0.47253	0.121937
YDL054C	MCH1	0.874844	0.803948	1.08819	7.65037	56.6633	7.40661	5.82434	2.88881	0.121924
YIL068C	SEC6	0.959547	0.881808	1.08816	13.6207	12.3922	0.909807	3.63136	-0.136367	0.12189
YDR091C	RLI1	0.918756	0.844376	1.08809	27.3034	13.2958	0.486965	3.7329	-1.03811	0.121795
YJL058C	BIT61	0.971544	0.892895	1.08808	8.50387	11.1398	1.30997	3.47766	0.389538	0.121789
YNL214W	PEX17	0.933302	0.857786	1.08804	14.2534	13.8765	0.973557	3.79457	-0.0386624	0.121727
YDR054C	CDC34	0.826537	0.759777	1.08787	21.9939	21.5966	0.981937	4.43273	-0.0262982	0.121503
YML001W	YPT7	0.702669	0.645941	1.08782	24.3501	17.1013	0.702309	4.09603	-0.509821	0.121443
YCL057C-A	YCL057C-A	1.20329	1.10617	1.0878	30.3689	21.3968	0.704562	4.41932	-0.505201	0.121416
YOR133W	EFT1	0.775479	0.712902	1.08778	49.8894	35.1842	0.705244	5.13686	-0.503807	0.121385
YLR109W	AHP1	0.611965	0.562613	1.08772	333.844	262.979	0.787729	8.0388	-0.344228	0.121308
YJL166W	QCR8	0.803691	0.738878	1.08772	29.8399	31.8323	1.06677	4.99242	0.0932475	0.121306
YNL220W	ADE12	0.736418	0.677089	1.08762	18.4375	42.0542	2.2809	5.39418	1.1896	0.121179
YNL221C	POP1	0.736418	0.677089	1.08762	16.9615	32.269	1.90248	5.01208	0.927885	0.121179
YMR297W	PRC1	1.08504	0.997664	1.08758	24.5226	33.0857	1.34919	5.04814	0.432097	0.121123
YGR007W	MUQ1	1.27934	1.17653	1.08739	33.9688	39.9886	1.17722	5.32152	0.235382	0.120867
YKL054C	DEF1	0.61229	0.563088	1.08738	39.3923	29.171	0.740526	4.86647	-0.433377	0.120855
YDR295C	HDA2	0.724817	0.666593	1.08734	13.107	12.0994	0.923124	3.59686	-0.115404	0.120809
YDR296W	MHR1	0.724817	0.666593	1.08734	22.2088	19.9738	0.899365	4.32004	-0.153021	0.120809
YGL095C	VPS45	0.88823	0.816891	1.08733	12.8918	14.7004	1.14029	3.87778	0.189404	0.12079
YOR034C	AKR2	0.712506	0.655349	1.08722	19.7868	13.915	0.703246	3.79857	-0.507899	0.120638
YNL075W	IMP4	0.757657	0.696938	1.08712	20.6587	14.9477	0.723557	3.90185	-0.466821	0.120514
YHL001W	RPL14B	0.725296	0.667193	1.08709	84.0473	85.492	1.01719	6.41772	0.0245871	0.120466
YPL254W	HFI1	0.792846	0.729441	1.08692	17.4811	15.5634	0.890297	3.96008	-0.167641	0.120248
YFR014C	CMK1	0.805885	0.741443	1.08691	14.0379	13.8055	0.983451	3.78718	-0.0240755	0.120238
YJR013W	GPI14	1.25155	1.15157	1.08682	19.8446	15.7776	0.795055	3.9798	-0.330873	0.120112
YJR012C	YJR012C	1.25155	1.15157	1.08682	13.9151	11.0536	0.794359	3.46644	-0.332137	0.120112
YCL017C	NFS1	0.873993	0.804204	1.08678	13.4099	13.3198	0.993282	3.73551	-0.00972534	0.120062
YOR078W	BUD21	0.97397	0.896264	1.0867	33.3719	22.7304	0.681124	4.50655	-0.55401	0.119953
YGL026C	TRP5	0.88151	0.811184	1.0867	19.0361	68.2589	3.58576	6.09295	1.84228	0.119949
YGL141W	HUL5	1.13014	1.03999	1.08668	12.1236	17.2699	1.42449	4.11019	0.510445	0.119934
YGL142C	GPI10	1.13014	1.03999	1.08668	9.97467	14.6516	1.46888	3.87299	0.55472	0.119934
YKL027W	YKL027W	0.657494	0.605054	1.08667	20.5439	13.0084	0.633201	3.70138	-0.659264	0.119915
YGR225W	AMA1	0.684086	0.629538	1.08665	4.70331	5.10846	1.08614	2.35289	0.119211	0.119885
YDR050C	TPI1	0.542698	0.499431	1.08663	214.969	153.57	0.714382	7.26275	-0.485233	0.119866
YDR076W	RAD55	0.510763	0.470055	1.0866	26.59	29.8064	1.12096	4.89755	0.16474	0.119826
YMR247C	RKR1	0.835096	0.768556	1.08658	13.006	13.713	1.05436	3.77747	0.0763689	0.119792
YJL163C	YJL163C	0.853289	0.785304	1.08657	10.6307	15.7298	1.47966	3.97542	0.565265	0.119783
YGL030W	RPL30	0.408742	0.376195	1.08652	147.857	123.372	0.834399	6.94687	-0.261191	0.119711
YJL061W	NUP82	0.865729	0.796807	1.0865	18.8146	15.6024	0.829271	3.9637	-0.270084	0.119686
YBR123C	TFC1	0.695783	0.640558	1.08621	12.6553	10.7953	0.853022	3.43233	-0.229344	0.11931
YPR010C	RPA135	0.815664	0.750931	1.0862	28.3642	13.0108	0.458706	3.70164	-1.12436	0.119295
YOL100W	PKH2	1.03187	0.949995	1.08619	15.3748	19.6751	1.2797	4.2983	0.355803	0.119275
YJL063C	MRPL8	1.24123	1.1428	1.08613	21.1243	21.2199	1.00453	4.40735	0.00651936	0.119198
YJL062W-A	YJL062W-A	1.24123	1.1428	1.08613	24.7787	30.3145	1.22341	4.92194	0.290909	0.119198
YHR021W-A	ECM12	0.338252	0.311539	1.08575	25.8365	45.2304	1.75064	5.49922	0.807881	0.11869
YFR024C-A	LSB3	0.866276	0.797972	1.0856	16.6199	13.1629	0.791997	3.71841	-0.336433	0.118488
YER162C	RAD4	0.987327	0.909502	1.08557	11.8775	11.1534	0.939035	3.47941	-0.0907484	0.118451
YMR190C	SGS1	1.10128	1.01449	1.08555	11.0203	7.0363	0.638483	2.81482	-0.64728	0.118429
YMR191W	SPG5	1.10128	1.01449	1.08555	12.5892	10.7493	0.853846	3.42617	-0.227952	0.118429
YDR252W	BTT1	0.764877	0.70461	1.08553	14.5045	18.5914	1.28177	4.21657	0.358138	0.118403
YOR316C	COT1	1.00584	0.926618	1.08549	17.0365	17.2134	1.01038	4.10546	0.0149013	0.118347
YNL138W	SRV2	0.951022	0.876124	1.08549	19.4777	26.9304	1.38263	4.75117	0.467413	0.118344
YMR284W	YKU70	0.70155	0.646329	1.08544	8.4958	11.2348	1.3224	3.48991	0.403157	0.118278
YJR044C	VPS55	0.607697	0.559885	1.0854	17.2052	26.868	1.56162	4.74782	0.643041	0.118222
YLR055C	SPT8	0.574806	0.529615	1.08533	11.8467	15.3855	1.29871	3.9435	0.377084	0.118131
YHR196W	UTP9	0.939966	0.866115	1.08527	26.9264	19.4013	0.72053	4.27808	-0.472869	0.11805
YGR287C	YGR287C	0.7106	0.654769	1.08527	6.01203	5.64254	0.938541	2.49635	-0.0915079	0.11805
YGL179C	TOS3	0.984105	0.906847	1.08519	14.1591	16.4907	1.16467	4.04358	0.219918	0.117953
YCR030C	SYP1	0.871578	0.803158	1.08519	19.6236	23.5615	1.20067	4.55836	0.263842	0.117946
YFL042C	YFL042C	1.40816	1.29771	1.08511	9.39236	14.9563	1.59238	3.90268	0.671189	0.117839
YFL041W-A	YFL041W-A	1.40816	1.29771	1.08511	10.717	15.259	1.42382	3.93159	0.509763	0.117839
YJR085C	YJR085C	1.12177	1.03381	1.08509	22.0663	27.3163	1.23792	4.77169	0.307916	0.11781
YHR143W-A	RPC10	0.800227	0.737507	1.08504	36.8606	24.0492	0.652436	4.58791	-0.616093	0.117753
YHR199C	FMP34	1.23225	1.13568	1.08503	20.5798	25.0801	1.21867	4.64847	0.285311	0.117735
YER149C	PEA2	1.2516	1.15352	1.08503	15.5949	12.6217	0.809348	3.65784	-0.305168	0.117731
YPR032W	SRO7	0.720346	0.663904	1.08501	9.33356	8.69859	0.931969	3.12078	-0.101646	0.117715
YOR004W	UTP23	0.986033	0.90879	1.085	16.2337	7.71995	0.475552	2.94859	-1.07232	0.117689
YNL116W	DMA2	0.985599	0.908456	1.08492	13.8219	15.1509	1.09615	3.92133	0.13245	0.117583
YBR150C	TBS1	0.584321	0.538611	1.08487	14.5265	17.5082	1.20526	4.12996	0.269348	0.117517
YBR151W	APD1	0.584321	0.538611	1.08487	18.5299	25.6148	1.38235	4.67891	0.467128	0.117517
YDR144C	MKC7	0.779032	0.718105	1.08484	19.6957	11.2763	0.572527	3.49523	-0.804585	0.117488
YNL097C	PHO23	1.01329	0.934102	1.08478	31.3112	42.2375	1.34896	5.40045	0.431845	0.117397
YML034W	SRC1	0.602891	0.555798	1.08473	16.5825	9.72707	0.586587	3.28201	-0.769584	0.117337
YML035C	AMD1	0.602891	0.555798	1.08473	18.3907	15.6899	0.853144	3.97176	-0.229138	0.117337
YHL026C	YHL026C	0.742464	0.684509	1.08467	23.9834	26.0146	1.08469	4.70125	0.117287	0.11725
YLR420W	URA4	0.917051	0.845496	1.08463	42.5585	22.3749	0.525744	4.48381	-0.927568	0.117203
YPL219W	PCL8	0.760058	0.700756	1.08463	11.8862	15.646	1.31632	3.96773	0.396515	0.117198
YPL181W	CTI6	0.599074	0.552352	1.08459	21.7457	20.6573	0.949948	4.36858	-0.0740801	0.117147
YDR322C-A	TIM11	0.901188	0.830908	1.08458	27.0392	32.8299	1.21416	5.03694	0.279955	0.117138
YLR445W	YLR445W	0.791933	0.730244	1.08448	5.52688	5.71812	1.0346	2.51554	0.0490767	0.117
[truncated: 3,333 more rows]

## Sheet: WT+-SM
Gene ID	log2 (+SM/-SM)_Rep1	Dye swap_Rep2	log2(+SM/-SM)_Rep3	Dye swap_Rep4	Mean log2 (+SM/-SM)	GeneName	log2 (+SM/-SM)_Rep1	Dye swap_Rep2	log2(+SM/-SM)_Rep3	Dye swap_Rep4	Mean log2 (+SM/-SM)
MET3	0.627	0.585	0.604		0.605333	MRPL7	-1.103	-0.779	-1.064	-1.028	-0.9935
YIM1	0.662	0.597	0.601		0.62	YDR042C	-1.184	-1.711	-0.928	-1.556	-1.34475
YDL144C	0.585	0.594	0.689		0.622667	TRM11	-1.794	-2.482	-3.049	-3.29	-2.65375
OCA2	0.595	0.67	0.604		0.623	ORM1	-0.903	-1.183	-1.08	-1.368	-1.1335
YLR041W	0.692	0.614	0.589		0.631667	YLR036C	-1.224	-1.177	-1.638	-1.06	-1.27475
IME2	0.657	0.619	0.622		0.632667	KTR3	-1.297	-1.004	-1.43	-0.8	-1.13275
PAU12	0.695	0.598	0.617		0.636667	PAT1	-1	-0.878	-0.627	-0.814	-0.82975
OAF1	0.612	0.643	0.661		0.638667	OLA1	-2.044	-2.056	-2.066	-2.146	-2.078
GTB1	0.608	0.68	0.63		0.639333	HOP1	-0.802	-0.696	-0.611		-0.703
YCR041W	0.626	0.653	0.663		0.647333	TOM71	-1.018	-0.828	-0.706		-0.850667
LAP2	0.659	0.595	0.692		0.648667	MES1	-0.974	-1.033	-1.021	-1.284	-1.078
NUP116	0.645	0.717	0.608		0.656667	NUP1	-1.049	-0.621	-1.178		-0.949333
SKG1	0.586	0.713	0.689	0.642	0.6575	RPS4B	-0.612	-1.793	-1.065	-1.617	-1.27175
BSP1	0.631	0.687	0.658		0.658667	CSL4	-0.822	-0.859	-0.822		-0.834333
ASR1	0.619	0.772	0.601	0.656	0.662	CCT4	-1.175	-0.66	-1.41		-1.08167
ATG21	0.643	0.654	0.761	0.59	0.662	CDC21	-1.615	-1.646	-1.552	-1.552	-1.59125
HSE1	0.628	0.675	0.686		0.663	INO2	-1.223	-1.019	-1.132	-1.244	-1.1545
SHG1	0.691	0.598	0.751	0.617	0.66425	RPS24A	-1.617	-0.801	-1.032		-1.15
APD1	0.596	0.615	0.783		0.664667	BBP1	-0.792	-1.304	-0.715	-1.296	-1.02675
PEX3	0.605	0.693	0.702		0.666667	PRS3	-1.37	-1.948	-1.816	-2.248	-1.8455
OXR1	0.632	0.776	0.597		0.668333	PAM18	-0.703	-0.666	-0.875	-0.898	-0.7855
AEP3	0.635	0.639	0.714	0.692	0.67	ALK2	-1.224	-1.431	-1.159	-1.271	-1.27125
CLA4	0.725	0.597	0.718	0.644	0.671	DCP1	-0.616	-0.989	-0.679	-1.201	-0.87125
SPT7	0.608	0.705	0.702		0.671667	RTT107	-1.732	-1.95	-1.464	-2.518	-1.916
YDL119C	0.739	0.632	0.631	0.693	0.67375	TRM1	-1.214	-1.726	-1.399	-2.421	-1.69
PDR8	0.752	0.649	0.627		0.676	PNO1	-0.77	-1.45	-1.619	-2.291	-1.5325
PET8	0.698	0.615	0.715		0.676	PRE7	-1.091	-1.203	-1.314	-1.336	-1.236
ACT1	0.678	0.716	0.637		0.677	AFG2	-0.727	-0.864	-0.825		-0.805333
YER138W-A	0.674	0.764	0.596		0.678	UTP14	-1.952	-2.616	-1.888	-3.2	-2.414
MSH4	0.709	0.681	0.649		0.679667	NCL1	-1.116	-1.332	-1.008	-2.004	-1.365
RMA1	0.734	0.618	0.592	0.782	0.6815	RPL18B	-2.444	-2.976	-2.898	-1.84	-2.5395
RFS1	0.681	0.62	0.746		0.682333	RPE1	-1.192	-1.447	-1.446	-0.893	-1.2445
SIN4	0.724	0.643	0.664	0.699	0.6825	RPS28B	-1.362	-1.256	-1.133		-1.25033
SRN2	0.693	0.597	0.762		0.684	SAM1	-0.631	-0.722	-1.514	-0.787	-0.9135
SKM1	0.614	0.62	0.652	0.86	0.6865	RPS7A	-1.09	-1.789	-1.386	-1.439	-1.426
GCN5	0.665	0.6	0.802		0.689	GIR2	-0.712	-0.722	-0.836		-0.756667
TOR1	0.636	0.704	0.729		0.689667	SNL1	-1.06	-0.753	-0.619		-0.810667
CHS3	0.709	0.735	0.633		0.692333	DBP8	-1.242	-2.001	-2.096	-2.398	-1.93425
YIP5	0.722	0.596	0.766		0.694667	YDR161W	-1.134	-1.242	-1.313	-1.79	-1.36975
YPR098C	0.652	0.826	0.609		0.695667
COS6	0.612	0.74	0.738		0.696667	DIP2	-0.94	-1.256	-0.978	-1.541	-1.17875
YKL071W	0.801	0.663	0.632		0.698667	YIL091C	-0.711	-1.549	-1.299	-2.07	-1.40725
CUP2	0.589	0.934	0.699	0.588	0.7025	ECM9	-1.027	-1.116	-1.14	-0.697	-0.995
ARH1	0.66	0.673	0.697	0.784	0.7035	BUD13	-0.924	-0.957	-0.763	-1.12	-0.941
SNT309	0.779	0.685	0.653		0.705667	RRP5	-1.559	-2.164	-1.671	-2.347	-1.93525
SPR1	0.607	0.768	0.755		0.71	RTN1	-0.945	-1.136	-1.146	-0.888	-1.02875
VTH2	0.616	0.677	0.837		0.71	SWT1	-0.821	-0.645	-0.963	-1.279	-0.927
AGC1	0.721	0.722	0.69		0.711	APA1	-1.49	-1.495	-1.713	-1.621	-1.57975
PRP45	0.667	0.859	0.612		0.712667	RFC5	-1.415	-1.749	-1.743	-1.604	-1.62775
COX6	0.649	0.661	0.839		0.716333	DPB4	-1.187	-0.718	-1.04		-0.981667
SPO22	0.598	0.599	0.962		0.719667	RSM23	-1.049	-0.855	-0.984	-0.738	-0.9065
RMI1	0.663	0.848	0.65		0.720333	RPL20B	-1.206	-1.781	-1.378	-1.326	-1.42275
ARG81	0.643	0.67	0.856		0.723	BUB1	-1.054	-1.268	-0.771	-0.947	-1.01
PAU1	0.741	0.622	0.921	0.608	0.723	PAP2	-0.739	-1.016	-1.1	-1.164	-1.00475
MSL1	0.694	0.781	0.695		0.723333	NDC1	-0.904	-0.7	-1.021		-0.875
FOX2	0.594	0.884	0.751	0.67	0.72475	GCD14	-0.833	-0.852	-1.346		-1.01033
LIP5	0.792	0.731	0.652		0.725	MIS1	-2.312	-2.731	-2.3	-2.323	-2.4165
YDR541C	0.643	0.732	0.802		0.725667	UBP3	-0.766	-0.628	-0.645		-0.679667
RXT3	0.809	0.643	0.736		0.729333	RPL7A	-2.12	-2.46	-2.785	-1.223	-2.147
YGR111W	0.585	0.778	0.681	0.876	0.73	WRS1	-1.193	-1.583	-1.613	-1.347	-1.434
TOK1	0.868	0.64	0.687		0.731667	SNC2	-0.68	-1.158	-0.91	-1.006	-0.9385
AIF1	0.77	0.82	0.748	0.595	0.73325	ARC1	-0.836	-1.54	-1.068	-1.589	-1.25825
CCZ1	0.874	0.708	0.618		0.733333	DAS2	-1.067	-1.305	-1.486	-1.569	-1.35675
PEP8	0.634	0.941	0.671	0.693	0.73475	POL32	-1.051	-0.725	-0.801	-1.566	-1.03575
PDC2	0.68	0.676	0.636	0.949	0.73525	PHS1	-1.503	-2.232	-1.955	-2.217	-1.97675
RMD5	0.611	0.592	1.006		0.736333	RPL19A	-0.939	-1.509	-1.024	-1.107	-1.14475
ITC1	0.769	0.698	0.742		0.736333	LSM7	-1.481	-1.935	-1.653	-1.649	-1.6795
RAM1	0.669	0.701	0.846		0.738667	RPA49	-1.481	-1.782	-1.911	-2.527	-1.92525
SNF6	0.725	0.616	0.879	0.739	0.73975	RRP14	-1.153	-1.357	-0.754	-1.886	-1.2875
RSF2	0.662	0.793	0.698	0.806	0.73975	RPL36A	-1.12	-1.915	-1.372	-0.99	-1.34925
CLF1	0.692	0.743	0.921	0.612	0.742	DEF1	-1.404	-1.229	-1.249	-0.723	-1.15125
IRC4	0.902	0.698	0.627		0.742333	LIP1	-2.056	-2.484	-2.487	-1.979	-2.2515
PDR11	0.752	0.776	0.719	0.732	0.74475	PMT1	-1.126	-0.887	-0.957	-0.977	-0.98675
PAU13	0.685	0.696	0.922	0.677	0.745	PBI2	-1.04	-1.133	-1.68		-1.28433
SMD1	0.912	0.714	0.74	0.615	0.74525	RRN11	-0.773	-1.199	-1.783	-2.678	-1.60825
PRP40	0.645	0.684	0.914	0.747	0.7475	RFC4	-1.281	-1.399	-1.146	-1.791	-1.40425
KEX2	0.735	0.879	0.629		0.747667	MDE1	-0.744	-0.625	-0.844		-0.737667
MDM36	0.814	0.712	0.715	0.75	0.74775	MRPL32	-0.59	-0.974	-0.593		-0.719
YTA7	0.712	0.78	0.756		0.749333
MIC14	0.69	0.659	0.9		0.749667	MSH6	-1.753	-1.464	-1.777	-1.846	-1.71
YEL025C	0.717	0.76	0.774		0.750333	UNG1	-0.98	-1.297	-0.944	-1.341	-1.1405
YPL150W	0.637	0.864	0.855	0.65	0.7515
VTH1	0.608	0.68	0.667	1.051	0.7515	SWF1	-0.808	-0.672	-0.854	-0.882	-0.804
CSI1	0.707	0.691	0.857		0.751667	DUS3	-1.183	-1.302	-1.376	-1.601	-1.3655
YGR031W	0.624	0.673	0.964		0.753667	VPS66	-1.026	-1.539	-1.12	-1.482	-1.29175
FMP27	0.78	0.632	0.851		0.754333	FYV7	-1.268	-1.053	-1.573	-1.421	-1.32875
VPS17	0.591	0.796	0.67	0.961	0.7545	SUP45	-1.337	-1.56	-1.638	-1.64	-1.54375
ARC19	0.847	0.585	0.834		0.755333	BNA5	-1.14	-0.847	-1.268	-0.843	-1.0245
SCO2	0.808	0.681	0.777		0.755333	RPO31	-0.691	-1.237	-1.136	-1.447	-1.12775
SFI1	0.587	1.016	0.664		0.755667	RPS1A	-1.089	-1.28	-0.941	-1.632	-1.2355
TFB1	0.595	0.706	0.969		0.756667	SKG3	-1.26	-0.877	-1.815	-0.907	-1.21475
APM2	0.677	0.642	0.88	0.828	0.75675	BCP1	-1.256	-1.622	-1.585	-2.227	-1.6725
DMA1	0.779	0.721	0.773		0.757667	ERP2	-1.146	-1.173	-0.997	-1.439	-1.18875
MXR2	0.735	0.787	0.751		0.757667	NOC2	-1.43	-1.995	-1.87	-2.592	-1.97175
YPR148C	0.618	0.721	1.033	0.66	0.758
PAU14	0.713	0.653	0.909		0.758333	PBP2	-0.812	-0.732	-0.595	-0.833	-0.743
OSH6	0.727	0.851	0.782	0.677	0.75925	PAB1	-1.428	-1.077	-1.369	-1.144	-1.2545
ARR1	0.633	0.885	0.806	0.718	0.7605	CAF120	-0.92	-0.965	-1.433		-1.106
NEJ1	0.658	0.664	0.963		0.761667	NOP4	-1.574	-2.053	-1.49	-2.663	-1.945
SOG2	0.691	0.733	0.931	0.695	0.7625	RRP8	-1.902	-2.269	-2.4	-2.911	-2.3705
YNL208W	0.703	0.807	0.784		0.764667	YPL225W	-0.948	-1.124	-0.938	-1.029	-1.00975
SOL2	1.084	0.62	0.594		0.766	RRP9	-0.995	-0.977	-1.419	-1.346	-1.18425
YDR131C	0.756	0.595	0.899	0.816	0.7665	TRX1	-1.188	-1.363	-1.588	-0.598	-1.18425
CTS2	0.694	0.683	0.805	0.885	0.76675	ECL1	-2.457	-1.98	-2.761	-1.807	-2.25125
ROG1	0.824	0.758	0.719		0.767	RPL24A	-1.671	-1.791	-1.324	-1.677	-1.61575
FSH2	0.753	0.736	0.663	0.917	0.76725	GCN20	-0.629	-0.769	-0.625		-0.674333
AEP1	0.659	0.8	0.853	0.759	0.76775	ALG8	-0.812	-1.036	-1.119	-1.159	-1.0315
TC20894	0.9	0.631	0.75	0.791	0.768	SGO1	-0.737	-1.174	-1.109	-0.659	-0.91975
YHR212C	0.677	1.035	0.593		0.768333	YBR266C	-0.775	-2.237	-0.807	-1.049	-1.217
PAU9	0.736	0.912	0.658		0.768667	PGM1	-1.829	-1.546	-1.974	-1.848	-1.79925
COX15	0.762	0.658	0.89		0.77	DOG2	-1.656	-1.397	-2.078	-0.971	-1.5255
TC20142	0.684	0.904	0.725		0.771	SFL1	-1.754	-1.292	-1.98	-0.727	-1.43825
YBR197C	0.79	0.856	0.668		0.771333	TMA23	-0.747	-1.337	-0.849	-1.608	-1.13525
PEX10	0.959	0.589	0.771		0.773	PRM7	-1.109	-2.024	-3.832	-2.899	-2.466
SPG5	0.844	0.689	0.786		0.773	RSA1	-0.883	-0.751	-0.642	-1.069	-0.83625
ADE13	1.088	0.773	0.635	0.597	0.77325	AIM29	-0.849	-1.329	-0.748	-0.734	-0.915
ENT2	0.705	0.849	0.766		0.773333	FEN1	-1.967	-2.939	-2.453	-3.068	-2.60675
PRP4	0.788	0.633	0.903		0.774667	RFC1	-0.974	-0.888	-0.806	-0.636	-0.826
YBR138C	0.667	0.945	0.714		0.775333	TLG1	-0.867	-0.79	-0.699	-1.106	-0.8655
FAA2	0.85	0.924	0.624	0.706	0.776	FPR4	-2.271	-2.684	-2.587	-3.328	-2.7175
YKR106W	0.609	0.988	0.735		0.777333	YKL044W	-0.883	-0.634	-0.924		-0.813667
YMR086W	0.715	0.607	1.01		0.777333	YNL181W	-0.73	-0.862	-0.913	-1.058	-0.89075
PHO80	0.79	0.809	0.733		0.777333	PTK1	-0.943	-0.83	-1.277		-1.01667
CDC16	0.665	0.829	0.684	0.935	0.77825	DBP10	-1.615	-1.966	-1.78	-1.835	-1.799
UBX3	0.643	0.934	0.726	0.811	0.7785	SRM1	-1.222	-1.398	-1.281	-1.466	-1.34175
GPB1	0.707	0.771	0.919	0.721	0.7795	HCA4	-1.431	-2.115	-1.836	-2.691	-2.01825
SIS1	0.765	0.732	0.682	0.94	0.77975	RPS4A	-1.59	-1.081	-1.463		-1.378
SLX5	0.588	0.708	1.045		0.780333	RPT6	-0.86	-1.154	-0.93	-1.088	-1.008
APC1	0.648	0.833	0.602	1.039	0.7805	ATP3	-0.9	-0.747	-1.212	-0.832	-0.92275
YLR241W	0.796	0.767	0.785		0.782667	YLR363W-A	-0.808	-1.865	-1.436	-2.246	-1.58875
PPH21	0.858	0.728	0.886	0.659	0.78275	RCK1	-1.113	-1.239	-0.852		-1.068
TC21605	0.671	0.787	0.894		0.784	SHO1	-1.026	-1.589	-1.275	-1.555	-1.36125
HEM14	0.633	0.766	0.954		0.784333	IES3	-0.636	-0.758	-0.706		-0.7
SEC15	0.819	0.794	0.74		0.784333	RPS11A	-1.792	-2.771	-2.33	-1.974	-2.21675
TRX3	0.592	0.84	0.921		0.784333	SPE3	-2.005	-2.333	-1.813	-2.429	-2.145
GSM1	0.674	0.876	0.855	0.739	0.786	HMT1	-1.122	-1.247	-2.161	-2.108	-1.6595
MSO1	0.775	0.625	0.912	0.833	0.78625	NEW1	-1.241	-1.371	-1.144	-1.319	-1.26875
EAF3	0.665	0.881	0.82	0.783	0.78725	FAA3	-1.902	-1.753	-1.782	-1.685	-1.7805
CCW12	0.593	1.071	0.7		0.788	DAD3	-1.175	-1.103	-0.95	-0.88	-1.027
YGR015C	0.769	0.656	0.939	0.789	0.78825	VPS1	-0.945	-1.132	-0.919	-1.261	-1.06425
RDR1	0.639	0.657	0.797	1.062	0.78875	RPC25	-0.751	-1.198	-1.673		-1.20733
AKL1	0.655	0.768	0.947		0.79	ASF1	-1.608	-1.632	-0.893		-1.37767
YKL131W	0.702	0.859	1.02	0.586	0.79175	YJL009W	-1.674	-1.828	-1.905		-1.80233
AHA1	0.669	0.8	0.611	1.092	0.793	ARB1	-1.694	-1.845	-2.126	-1.701	-1.8415
ERG8	0.772	0.717	0.891		0.793333	FKH1	-1.482	-0.979	-1.459	-0.954	-1.2185
MRL1	0.857	0.685	0.923	0.71	0.79375	NAB3	-0.98	-0.809	-1.004		-0.931
PAU24	0.714	0.691	0.98		0.795	PEX31	-1.327	-1.25	-1.597	-1.328	-1.3755
RPB4	0.746	0.768	0.871		0.795	RPL27B	-1.633	-1.006	-1.066		-1.235
KRE6	0.837	0.614	1.044	0.686	0.79525	MDM35	-0.837	-1.358	-1.293		-1.16267
VPS64	0.633	0.87	0.883		0.795333	SVP26	-0.896	-1.423	-1.132	-1.194	-1.16125
NAP1	0.71	0.65	1.027		0.795667	NOG1	-2.144	-2.5	-2.798	-3.518	-2.74
YAP1	0.726	0.897	0.672	0.888	0.79575	TDH2	-0.766	-1.522	-0.882	-0.69	-0.965
IRA1	0.606	0.801	0.907	0.871	0.79625	LCB2	-1.088	-1.078	-1.148	-0.734	-1.012
YPT10	0.755	0.777	0.871	0.786	0.79725
PMC1	0.593	0.903	0.897		0.797667	PXR1	-1.32	-1.901	-1.728	-1.912	-1.71525
TEM1	0.608	0.83	0.874	0.88	0.798	SIR2	-1.145	-1.472	-1.651	-1.008	-1.319
TCM62	0.6	0.83	0.964		0.798	SHR3	-0.967	-1.095	-1.134	-0.768	-0.991
PAU2	0.633	0.73	0.865	0.968	0.799	PDS5	-1.949	-1.444	-1.638	-1.728	-1.68975
YKR017C	0.609	1.058	0.73	0.814	0.80275	YJR129C	-1.614	-1.899	-1.683	-1.823	-1.75475
[truncated: 1,211 more rows]
