# Supplementary material for: Genome-wide cooperation by HAT Gcn5, remodeler SWI/SNF, and chaperone Ydj1 in promoter nucleosome eviction and transcriptional activation
Source: HighWire-hosted journal article supplement (doi:10.1101/gr.196337.115), 2015-11-24
Supplement: File_S2.xlsx [file File_S2.xlsx]

## Sheet: Mean, CI, rel to WT
Mean Avg. H3 Occ. (+/-SEM) and fold-changes relative to WT-I
	All genes_[-1,NDR,+1]			All genes_-1 nuc			All genes_NDR			All genes_+1 nuc
	Mean	95% CI	rel to WT-I	Mean	95% CI	rel to WT-I	Mean	95% CI	rel to WT-I	Mean	95% CI	rel WT-I
WT-U	0.871662	0.00602614	1.06952	0.99526	0.00794597	1.07479	0.56642	0.00610613	1.09347	1.09028	0.00698605	1.05239
WT-I	0.815219	0.0060528	1.00027	0.926109	0.00802596	1.00012	0.517782	0.00586615	0.99958	1.03642	0.00714604	1.0004
ydj1∆-I	0.786199	0.00511955	0.964661	0.877931	0.00610613	0.948089	0.55449	0.00583949	1.07044	0.966116	0.00509289	0.932544
snf2∆-I	0.828418	0.00490624	1.01646	0.91782	0.00551952	0.991166	0.608744	0.00594614	1.17518	0.999828	0.00471959	0.965085
gcn5∆-I	0.918658	0.00519954	1.12719	1.01098	0.00618612	1.09177	0.693662	0.00685273	1.33911	1.107	0.00514621	1.06854
snf2∆ydj1∆/lcGCN4-I	0.878629	0.00498623	1.07807	0.969851	0.00589282	1.04736	0.653084	0.00629278	1.26078	1.06162	0.00511955	1.02473
gcn5∆ydj1∆-I	0.897333	0.00501289	1.10102	0.999395	0.00607947	1.07926	0.656656	0.00661275	1.26768	1.08972	0.00495956	1.05185
Ptet-SNF2-I	0.810158	0.00514621	0.994059	0.894392	0.0060528	0.965866	0.592911	0.00621279	1.14462	0.987012	0.00511955	0.952714
Ptet-SNF2gcn5∆-I	0.917534	0.00485291	1.12581	1.01332	0.00581282	1.0943	0.698002	0.00663942	1.34749	1.09673	0.00490624	1.05862
Ptet-SNF2gcn5∆ydj1∆/lcGCN4-I	0.941091	0.00506622	1.15471	1.04165	0.00618612	1.12489	0.726433	0.00690606	1.40238	1.10951	0.00543952	1.07095
	4744 genes_[-1,NDR,+1]			4744 genes_-1 nuc			4744 genes_NDR			4744 genes_+1 nuc
	Mean	95% CI	rel to WT-I	Mean	95% CI	rel to WT-I	Mean	95% CI	rel to WT-I	Mean	95% CI	rel WT-I
WT-U	0.874387	0.00643108	1.05602	0.995491	0.00850838	1.07504	0.564341	0.00645954	1.07699	1.09842	0.00737014	1.04017
WT-I	0.827776	0.00631726	0.999729	0.936971	0.00847993	1.01185	0.524124	0.00614652	1.00024	1.05596	0.00737014	0.999961
ydj1∆-I	0.795688	0.0053213	0.960975	0.887341	0.00640263	0.958251	0.559807	0.00611807	1.06833	0.979041	0.00737014	0.927122
snf2∆-I	0.836582	0.0051221	1.01036	0.925133	0.00583351	0.999064	0.613088	0.00623189	1.17002	1.01195	0.00737014	0.958289
gcn5∆-I	0.926382	0.00537821	1.11882	1.017	0.006488	1.09827	0.698459	0.0071994	1.33294	1.11815	0.00737014	1.05886
snf2∆ydj1∆/lcGCN4-I	0.886524	0.00517901	1.07068	0.976737	0.00620344	1.05479	0.657145	0.00663028	1.25409	1.07329	0.00737014	1.01638
gcn5∆ydj1∆-I	0.904139	0.00520747	1.09196	1.00509	0.00643108	1.08541	0.660131	0.00694329	1.25979	1.09954	0.00737014	1.04123
Ptet-SNF2-I	0.808119	0.00537821	0.975989	0.904247	0.00631726	0.976509	0.599556	0.006488	1.14419	1.00151	0.00737014	0.948399
Ptet-SNF2gcn5∆-I	0.915256	0.00509365	1.10538	1.01746	0.00614652	1.09877	0.700613	0.00697175	1.33705	1.10521	0.00737014	1.0466
Ptet-SNF2gcn5∆ydj1∆/lcGCN4-I	0.936186	0.00529284	1.13066	1.04559	0.00651645	1.12914	0.727302	0.00722786	1.38798	1.11715	0.00737014	1.05791
	204 genes_[-1,NDR,+1]			204 genes_-1 nuc			204 genes_NDR			204 genes_+1 nuc
	Mean	95% CI	rel to WT-I	Mean	95% CI	rel to WT-I	Mean	95% CI	rel to WT-I	Mean	95% CI	rel WT-I
WT-U	0.831	0.0314245	1.31696	0.997965	0.0381485	1.2927	0.559536	0.0336201	1.43104	1.00694	0.0360902	1.27784
WT-I	0.631	0.0348551	1	0.772254	0.047617	1.00033	0.390697	0.0321106	1	0.787508	0.0418536	1
ydj1∆-I	0.636	0.0308756	1.00792	0.739459	0.0377369	0.957849	0.436591	0.0326595	1.1166	0.790476	0.0319734	1.00314
snf2∆-I	0.698	0.0285428	1.10618	0.812174	0.0304639	1.05204	0.504261	0.0323851	1.28967	0.836367	0.0304639	1.06138
gcn5∆-I	0.785	0.0318362	1.24406	0.918793	0.0378741	1.19015	0.568639	0.0375996	1.45432	0.946008	0.0343062	1.20052
snf2∆ydj1∆/lcGCN4-I	0.747	0.0296406	1.18384	0.876882	0.0327968	1.13586	0.541392	0.0343062	1.38463	0.891486	0.0321106	1.13133
gcn5∆ydj1∆-I	0.784	0.0304639	1.24247	0.922778	0.0356785	1.19531	0.555817	0.035404	1.42153	0.950769	0.0330712	1.20656
Ptet-SNF2-I	0.638	0.0303267	1.01109	0.748905	0.0369135	0.970084	0.446274	0.0336201	1.14137	0.782455	0.0325223	0.992964
Ptet-SNF2gcn5∆-I	0.816	0.0297778	1.29319	0.952573	0.0337573	1.2339	0.602631	0.0367763	1.54126	0.971657	0.0323851	1.23307
Ptet-SNF2gcn5∆ydj1∆/lcGCN4-I	0.856	0.0300523	1.35658	0.998069	0.0337573	1.29284	0.651373	0.0378741	1.66592	0.998924	0.0322479	1.26767
	70 genes_[-1,NDR,+1]			70 genes_-1 nuc			70 genes_NDR			70 genes_+1 nuc
	Mean	95% CI	rel to WT-I	Mean	95% CI	rel to WT-I	Mean	95% CI	rel to WT-I	Mean	95% CI	rel WT-I
WT-U	0.759	0.054817	1.87407	0.912962	0.0684041	1.96759	0.524014	0.055754	2.30843	0.923715	0.0524744	1.60089
WT-I	0.405	0.0374817	1	0.46363	0.0618448	0.999202	0.227068	0.0311566	1.0003	0.576519	0.0531771	1
ydj1∆-I	0.466	0.0447438	1.15062	0.508373	0.0613763	1.09563	0.289805	0.0405271	1.27667	0.658801	0.0520058	1.14177
snf2∆-I	0.577	0.049429	1.42469	0.657255	0.0545827	1.4165	0.402701	0.049429	1.77401	0.733052	0.0555197	1.27045
gcn5∆-I	0.651	0.0585651	1.60741	0.742451	0.0747291	1.60011	0.440286	0.0616105	1.93959	0.853709	0.067467	1.47956
snf2∆ydj1∆/lcGCN4-I	0.637	0.0520058	1.57284	0.73016	0.0625476	1.57362	0.442692	0.0513031	1.95018	0.812327	0.0595022	1.40785
gcn5∆ydj1∆-I	0.663	0.0585651	1.63704	0.763317	0.0707467	1.64508	0.4519	0.0606735	1.99075	0.855099	0.0625476	1.48197
Ptet-SNF2-I	0.483	0.0463836	1.19259	0.534288	0.0602049	1.15148	0.312535	0.0438067	1.37681	0.666449	0.0583309	1.15502
Ptet-SNF2gcn5∆-I	0.719	0.0578623	1.77531	0.830295	0.0677013	1.78943	0.515579	0.0630161	2.27127	0.897841	0.0651244	1.55605
Ptet-SNF2gcn5∆ydj1∆/lcGCN4-I	0.762	0.0573938	1.88148	0.877697	0.0667642	1.89159	0.572136	0.0677013	2.52042	0.927754	0.0602049	1.60789

## Sheet: 70genes_3zones
Avg H3 Occ. in combined [-1,NDR,+1] zones for 70 SM-induced exemplar genes
Systematic name	Common name	WT-U	WT-I	ydj1∆-I	snf2∆-I	gcn5∆-I	snf2∆ydj1∆/lcGCN4-I	gcn5∆ydj1∆-I	Ptet-SNF2-I	Ptet-SNF2gcn5∆-I	Ptet-SNF2gcn5∆ydj1∆/lcGCN4-I
YMR251W-A	HOR7	0.351355	0.057515	0.0640854	0.286542	0.146437	0.428999	0.124371	0.179475	0.622311	0.458336
YNL104C	LEU4	0.636821	0.119635	0.130321	0.305394	0.180422	0.369467	0.179248	0.113194	0.200503	0.239762
YPR036W-A	YPR036W-A	0.338228	0.074911	0.0274068	0.0537475	0.113346	0.0864221	0.0994373	0.0339687	0.144429	0.164953
YPL250C	ICY2	0.63785	0.156232	0.10059	0.202264	0.25805	0.150768	0.190463	0.150831	0.305297	0.373637
YOL058W	ARG1	0.742973	0.188794	0.309445	0.19773	0.215209	0.352688	0.277696	0.158032	0.232755	0.576772
YCL030C	HIS4	0.952517	0.286274	0.367413	0.773315	0.355239	0.646563	0.5201	0.339521	0.781835	0.851642
YBR145W	ADH5	1.05289	0.317974	0.405556	0.574542	0.709303	0.507821	0.767873	0.324172	0.796036	0.814806
YOR130C	ORT1	1.27451	0.421851	0.588654	0.715655	0.702685	0.813902	0.933771	0.524259	0.873543	0.931745
YHR018C	ARG4	0.951041	0.360557	0.535396	0.517603	0.682193	0.56154	0.791473	0.405142	0.763481	0.896873
YOL119C	MCH4	1.18276	0.449968	0.481856	0.791477	0.773717	0.955946	0.846918	0.562697	1.05318	1.03548
YDR380W	ARO10	0.878147	0.352115	0.510961	0.762582	0.667685	0.910942	0.741961	0.666648	0.903123	0.867112
YGL117W	YGL117W	1.04504	0.429063	0.542445	0.776518	0.801113	0.819996	0.860162	0.603262	0.905434	1.15273
YJL088W	ARG3	0.440281	0.182799	0.212494	0.255356	0.296021	0.336437	0.288173	0.173162	0.284113	0.333563
YGR161C	RTS3	0.517818	0.21772	0.124417	0.14117	0.164971	0.148411	0.14086	0.158491	0.217699	0.155823
YER052C	HOM3	0.70626	0.298351	0.377832	0.506249	0.640493	0.591363	0.664328	0.445122	0.744716	0.816381
YIL051C	MMF1	0.773678	0.330911	0.495559	0.59335	0.717406	0.777248	0.805337	0.501552	0.81934	1.00753
YER069W	ARG5,6	0.692556	0.301915	0.293006	0.293385	0.44563	0.327139	0.410289	0.2408	0.417452	0.464276
YHR022C	YHR022C	0.851535	0.386717	0.632417	0.713629	0.928869	0.829062	0.848163	0.576943	0.884299	0.819085
YDR127W	ARO1	0.925387	0.424035	0.36796	0.463771	0.55635	0.478059	0.608358	0.316488	0.607402	0.495002
YDL182W	LYS20	0.509521	0.238126	0.226828	0.385228	0.234081	0.375837	0.282798	0.233387	0.426583	0.415094
YDL131W	LYS21	0.527599	0.255831	0.259398	0.267997	0.338485	0.326252	0.309545	0.204282	0.328591	0.497176
YDR354W	TRP4	0.86926	0.424942	0.447389	0.624097	0.653711	0.602804	0.786206	0.493945	0.872588	1.01453
YIL116W	HIS5	0.780858	0.386975	0.551752	0.653959	0.656931	0.594317	0.675073	0.433381	0.716752	0.721048
YER055C	HIS1	0.564525	0.281287	0.373296	0.439267	0.402481	0.449196	0.474956	0.30883	0.559733	0.718133
YOR303W	CPA1	0.558719	0.281351	0.330376	0.306092	0.426201	0.427771	0.384379	0.321571	0.331024	0.567595
YLR120C	YPS1	1.01997	0.515041	0.50046	0.829264	0.917595	0.917927	0.966553	0.717425	1.17776	1.18299
YNL125C	ESBP6	0.815081	0.412527	0.574504	0.653823	0.721299	0.735178	0.673831	0.505098	0.753068	0.716835
YMR062C	ARG7	1.2115	0.618704	0.592859	0.61954	0.682616	0.742544	0.74059	0.477782	0.756163	0.821939
YBR249C	ARO4	0.627633	0.331298	0.440101	0.520234	0.545223	0.525571	0.596538	0.362359	0.614484	0.634778
YGL032C	AGA2	0.603661	0.32553	0.563054	0.725812	0.842105	0.826945	0.817771	0.609894	0.838069	0.968754
YHR162W	MPC2	0.692554	0.375085	0.323666	0.315381	0.492252	0.394521	0.546532	0.303345	0.496674	0.619616
YCR005C	CIT2	0.586524	0.324598	0.0879919	0.431646	0.474945	0.483327	0.416511	0.15983	0.426162	0.458346
YPL264C	YPL264C	0.849899	0.476998	0.673933	0.711435	0.951721	0.66972	0.858742	0.503463	0.884904	0.804338
YOR337W	TEA1	0.51709	0.290545	0.350016	0.427232	0.510758	0.519765	0.572569	0.387209	0.52144	0.626148
YKL211C	TRP3	1.04506	0.590803	0.454744	0.591693	0.823293	0.709535	0.836505	0.595627	0.820132	0.786116
YLR258W	GSY2	1.00763	0.570507	0.611441	0.675121	0.844271	0.957787	0.870453	0.644709	0.857834	0.840777
YBR248C	HIS7	0.845242	0.479818	0.559435	0.643544	0.794814	0.623927	0.837182	0.485552	0.813478	0.969274
YIL015W	BAR1	0.636174	0.361402	0.536886	0.730634	0.922261	0.865156	0.965807	0.619849	1.05151	1.09721
YGL184C	STR3	0.572033	0.327819	0.40084	0.378185	0.431833	0.395204	0.44665	0.342328	0.416067	0.781998
YPL135W	ISU1	0.727203	0.419555	0.437452	0.453093	0.558762	0.566458	0.512204	0.470989	0.662145	0.686078
YFL026W	STE2	0.377084	0.218179	0.415989	0.652021	0.53255	0.734319	0.735181	0.46773	0.769133	0.995018
YOL084W	PHM7	1.01641	0.605239	0.577965	0.578097	0.661231	0.794093	0.704211	0.692349	0.86238	0.756396
YJR109C	CPA2	0.632834	0.380434	0.395997	0.467452	0.636866	0.544796	0.525784	0.417007	0.589003	0.486877
YOR230W	WTM1	0.730551	0.44158	0.448405	0.709116	0.819376	0.808138	0.77164	0.532404	0.844583	0.97193
YDR379C-A	SDH6	0.969624	0.586216	0.672007	0.781595	0.981004	0.956104	0.986716	0.759979	1.02849	1.25231
YOR221C	MCT1	1.12736	0.685588	0.671633	0.778867	0.797489	0.845055	0.875226	0.582425	0.963397	0.931706
YFL014W	HSP12	0.434605	0.266616	0.31471	0.356597	0.443982	0.480655	0.410039	0.383214	0.510694	0.520148
YER053C	PIC2	0.914523	0.570618	0.65552	0.737081	0.972427	0.843113	1.00564	0.718511	0.990869	1.06109
YER175C	TMT1	0.755892	0.473955	0.654572	0.873836	0.934385	0.707941	0.873572	0.656636	0.918064	0.948742
YNR069C	BSC5	0.987344	0.621509	0.712406	0.968152	1.00121	0.731892	1.02535	0.740721	1.11664	0.913207
YDR043C	NRG1	0.30091	0.191004	0.268069	0.442607	0.341273	0.484009	0.307615	0.441161	0.544157	0.659473
YOL052C-A	DDR2	0.532094	0.341725	0.43586	0.601159	0.504882	0.680742	0.577344	0.607715	0.606795	0.718818
YNR044W	AGA1	0.924404	0.596438	0.991149	0.97618	1.17398	1.07452	1.06987	0.974297	1.1364	1.28127
YJR148W	BAT2	0.642508	0.417125	0.535451	0.67128	0.916941	0.725991	0.866889	0.580454	0.982891	0.786802
YLR452C	SST2	0.653187	0.425292	0.656065	0.832281	0.937038	0.912466	0.9053	0.769662	0.971373	0.979552
YGL202W	ARO8	0.593927	0.387175	0.422957	0.525689	0.67759	0.521607	0.699379	0.442381	0.694017	0.692312
YLL048C	YBT1	0.815457	0.533715	0.612403	0.717994	0.915414	0.797947	0.82644	0.630991	0.746822	0.952325
YNL036W	NCE103	0.479931	0.318022	0.322534	0.374882	0.55238	0.382946	0.434179	0.360501	0.533143	0.528516
YIL117C	PRM5	0.619215	0.410425	0.457268	0.532406	0.682967	0.538275	0.730337	0.425154	0.620118	0.740121
YGL186C	TPN1	0.961277	0.646707	0.733574	0.777216	0.973841	0.814341	0.89195	0.664642	0.919059	1.13041
YDL025C	YDL025C	1.27128	0.858507	0.88446	1.05194	1.09756	1.14362	1.09917	0.903862	1.16897	0.961305
YBR047W	FMP23	1.07232	0.725639	0.815528	0.949629	0.971187	0.903294	0.94433	0.792785	0.956715	0.854695
YGR088W	CTT1	0.949232	0.643204	0.583637	0.66342	0.6805	0.812454	0.640827	0.691716	0.831267	0.75672
YBR218C	PYC2	0.447208	0.307807	0.403023	0.390352	0.527716	0.491656	0.53576	0.407285	0.568493	0.604496
YKL035W	UGP1	0.713117	0.491942	0.561692	0.650587	0.731185	0.850444	0.814668	0.676022	0.87622	0.797377
YLR304C	ACO1	0.639576	0.441818	0.366261	0.496692	0.640144	0.664921	0.610083	0.445457	0.64285	0.54551
YDR531W	YDR531W	0.856435	0.599766	0.653384	0.669339	0.920261	0.722761	0.856934	0.698528	0.87252	0.80688
YDL198C	GGC1	0.861545	0.605475	0.589684	0.592779	0.579743	0.585927	0.780033	0.490763	0.744217	0.908808
YLL028W	TPO1	0.409633	0.288551	0.281538	0.52187	0.477923	0.492525	0.421459	0.468357	0.619894	0.636615
YJR154W	YJR154W	0.895518	0.632744	0.671234	0.733738	0.892074	0.737641	0.793223	0.720373	0.797986	0.800198
	Mean	0.758634	0.40513	0.466132	0.576892	0.650799	0.636953	0.662708	0.482824	0.718704	0.762342
	SD	0.234494	0.160255	0.190848	0.210649	0.249883	0.221508	0.250082	0.198228	0.246776	0.244702
	SEM	0.0280274	0.0191541	0.0228106	0.0251774	0.0298667	0.0264752	0.0298905	0.0236927	0.0294953	0.0292474
	CI	0.054817	0.0374817	0.0447438	0.049429	0.0585651	0.0520058	0.0585651	0.0463836	0.0578623	0.0573938
	rel to WT-I	1.87317	1.00032	1.15094	1.42442	1.60691	1.57272	1.63632	1.19216	1.77458	1.88233

## Sheet: 204genes_3zones
Avg H3 Occ. in combined [-1,NDR,+1] zones for 204 SM-induced genes
Systematic name	Common name	WT-U	WT-I	ydj1∆-I	snf2∆-I	gcn5∆-I	snf2∆ydj1∆/lcGCN4-I	gcn5∆ydj1∆-I	Ptet-SNF2-I	Ptet-SNF2gcn5∆-I	Ptet-SNF2gcn5∆ydj1∆/lcGCN4-I
YMR251W-A	HOR7	0.351355	0.057515	0.0640854	0.286542	0.146437	0.428999	0.124371	0.179475	0.622311	0.458336
YNL104C	LEU4	0.636821	0.119635	0.130321	0.305394	0.180422	0.369467	0.179248	0.113194	0.200503	0.239762
YPR036W-A	YPR036W-A/SPO24	0.338228	0.074911	0.0274068	0.0537475	0.113346	0.0864221	0.0994373	0.0339687	0.144429	0.164953
YPL250C	ICY2	0.63785	0.156232	0.10059	0.202264	0.25805	0.150768	0.190463	0.150831	0.305297	0.373637
YOL058W	ARG1	0.742973	0.188794	0.309445	0.19773	0.215209	0.352688	0.277696	0.158032	0.232755	0.576772
YCL030C	HIS4	0.952517	0.286274	0.367413	0.773315	0.355239	0.646563	0.5201	0.339521	0.781835	0.851642
YBR145W	ADH5	1.05289	0.317974	0.405556	0.574542	0.709303	0.507821	0.767873	0.324172	0.796036	0.814806
YOR130C	ORT1	1.27451	0.421851	0.588654	0.715655	0.702685	0.813902	0.933771	0.524259	0.873543	0.931745
YHR018C	ARG4	0.951041	0.360557	0.535396	0.517603	0.682193	0.56154	0.791473	0.405142	0.763481	0.896873
YOL119C	MCH4	1.18276	0.449968	0.481856	0.791477	0.773717	0.955946	0.846918	0.562697	1.05318	1.03548
YDR380W	ARO10	0.878147	0.352115	0.510961	0.762582	0.667685	0.910942	0.741961	0.666648	0.903123	0.867112
YGL117W	YGL117W	1.04504	0.429063	0.542445	0.776518	0.801113	0.819996	0.860162	0.603262	0.905434	1.15273
YJL088W	ARG3	0.440281	0.182799	0.212494	0.255356	0.296021	0.336437	0.288173	0.173162	0.284113	0.333563
YGR161C	RTS3	0.517818	0.21772	0.124417	0.14117	0.164971	0.148411	0.14086	0.158491	0.217699	0.155823
YER052C	HOM3	0.70626	0.298351	0.377832	0.506249	0.640493	0.591363	0.664328	0.445122	0.744716	0.816381
YIL051C	MMF1	0.773678	0.330911	0.495559	0.59335	0.717406	0.777248	0.805337	0.501552	0.81934	1.00753
YER069W	ARG5,6	0.692556	0.301915	0.293006	0.293385	0.44563	0.327139	0.410289	0.2408	0.417452	0.464276
YHR022C	YHR022C	0.851535	0.386717	0.632417	0.713629	0.928869	0.829062	0.848163	0.576943	0.884299	0.819085
YDR127W	ARO1	0.925387	0.424035	0.36796	0.463771	0.55635	0.478059	0.608358	0.316488	0.607402	0.495002
YDL182W	LYS20	0.509521	0.238126	0.226828	0.385228	0.234081	0.375837	0.282798	0.233387	0.426583	0.415094
YDL131W	LYS21	0.527599	0.255831	0.259398	0.267997	0.338485	0.326252	0.309545	0.204282	0.328591	0.497176
YDR354W	TRP4	0.86926	0.424942	0.447389	0.624097	0.653711	0.602804	0.786206	0.493945	0.872588	1.01453
YIL116W	HIS5	0.780858	0.386975	0.551752	0.653959	0.656931	0.594317	0.675073	0.433381	0.716752	0.721048
YER055C	HIS1	0.564525	0.281287	0.373296	0.439267	0.402481	0.449196	0.474956	0.30883	0.559733	0.718133
YOR303W	CPA1	0.558719	0.281351	0.330376	0.306092	0.426201	0.427771	0.384379	0.321571	0.331024	0.567595
YLR120C	YPS1	1.01997	0.515041	0.50046	0.829264	0.917595	0.917927	0.966553	0.717425	1.17776	1.18299
YNL125C	ESBP6	0.815081	0.412527	0.574504	0.653823	0.721299	0.735178	0.673831	0.505098	0.753068	0.716835
YMR062C	ECM40/ARG7	1.2115	0.618704	0.592859	0.61954	0.682616	0.742544	0.74059	0.477782	0.756163	0.821939
YBR249C	ARO4	0.627633	0.331298	0.440101	0.520234	0.545223	0.525571	0.596538	0.362359	0.614484	0.634778
YGL032C	AGA2	0.603661	0.32553	0.563054	0.725812	0.842105	0.826945	0.817771	0.609894	0.838069	0.968754
YHR162W	YHR162W/MPC2	0.692554	0.375085	0.323666	0.315381	0.492252	0.394521	0.546532	0.303345	0.496674	0.619616
YCR005C	CIT2	0.586524	0.324598	0.0879919	0.431646	0.474945	0.483327	0.416511	0.15983	0.426162	0.458346
YPL264C	YPL264C	0.849899	0.476998	0.673933	0.711435	0.951721	0.66972	0.858742	0.503463	0.884904	0.804338
YOR337W	TEA1	0.51709	0.290545	0.350016	0.427232	0.510758	0.519765	0.572569	0.387209	0.52144	0.626148
YKL211C	TRP3	1.04506	0.590803	0.454744	0.591693	0.823293	0.709535	0.836505	0.595627	0.820132	0.786116
YLR258W	GSY2	1.00763	0.570507	0.611441	0.675121	0.844271	0.957787	0.870453	0.644709	0.857834	0.840777
YBR248C	HIS7	0.845242	0.479818	0.559435	0.643544	0.794814	0.623927	0.837182	0.485552	0.813478	0.969274
YIL015W	BAR1	0.636174	0.361402	0.536886	0.730634	0.922261	0.865156	0.965807	0.619849	1.05151	1.09721
YGL184C	STR3	0.572033	0.327819	0.40084	0.378185	0.431833	0.395204	0.44665	0.342328	0.416067	0.781998
YPL135W	ISU1	0.727203	0.419555	0.437452	0.453093	0.558762	0.566458	0.512204	0.470989	0.662145	0.686078
YFL026W	STE2	0.377084	0.218179	0.415989	0.652021	0.53255	0.734319	0.735181	0.46773	0.769133	0.995018
YOL084W	PHM7	1.01641	0.605239	0.577965	0.578097	0.661231	0.794093	0.704211	0.692349	0.86238	0.756396
YJR109C	CPA2	0.632834	0.380434	0.395997	0.467452	0.636866	0.544796	0.525784	0.417007	0.589003	0.486877
YOR230W	WTM1	0.730551	0.44158	0.448405	0.709116	0.819376	0.808138	0.77164	0.532404	0.844583	0.97193
YDR379C-A	YDR379C-A	0.969624	0.586216	0.672007	0.781595	0.981004	0.956104	0.986716	0.759979	1.02849	1.25231
YOR221C	MCT1	1.12736	0.685588	0.671633	0.778867	0.797489	0.845055	0.875226	0.582425	0.963397	0.931706
YFL014W	HSP12	0.434605	0.266616	0.31471	0.356597	0.443982	0.480655	0.410039	0.383214	0.510694	0.520148
YER053C	PIC2	0.914523	0.570618	0.65552	0.737081	0.972427	0.843113	1.00564	0.718511	0.990869	1.06109
YER175C	TMT1	0.755892	0.473955	0.654572	0.873836	0.934385	0.707941	0.873572	0.656636	0.918064	0.948742
YNR069C	BSC5	0.987344	0.621509	0.712406	0.968152	1.00121	0.731892	1.02535	0.740721	1.11664	0.913207
YDR043C	NRG1	0.30091	0.191004	0.268069	0.442607	0.341273	0.484009	0.307615	0.441161	0.544157	0.659473
YOL052C-A	DDR2	0.532094	0.341725	0.43586	0.601159	0.504882	0.680742	0.577344	0.607715	0.606795	0.718818
YNR044W	AGA1	0.924404	0.596438	0.991149	0.97618	1.17398	1.07452	1.06987	0.974297	1.1364	1.28127
YJR148W	BAT2	0.642508	0.417125	0.535451	0.67128	0.916941	0.725991	0.866889	0.580454	0.982891	0.786802
YLR452C	SST2	0.653187	0.425292	0.656065	0.832281	0.937038	0.912466	0.9053	0.769662	0.971373	0.979552
YGL202W	ARO8	0.593927	0.387175	0.422957	0.525689	0.67759	0.521607	0.699379	0.442381	0.694017	0.692312
YLL048C	YBT1	0.815457	0.533715	0.612403	0.717994	0.915414	0.797947	0.82644	0.630991	0.746822	0.952325
YNL036W	NCE103	0.479931	0.318022	0.322534	0.374882	0.55238	0.382946	0.434179	0.360501	0.533143	0.528516
YIL117C	PRM5	0.619215	0.410425	0.457268	0.532406	0.682967	0.538275	0.730337	0.425154	0.620118	0.740121
YGL186C	TPN1	0.961277	0.646707	0.733574	0.777216	0.973841	0.814341	0.89195	0.664642	0.919059	1.13041
YDL025C	YDL025C	1.27128	0.858507	0.88446	1.05194	1.09756	1.14362	1.09917	0.903862	1.16897	0.961305
YBR047W	FMP23	1.07232	0.725639	0.815528	0.949629	0.971187	0.903294	0.94433	0.792785	0.956715	0.854695
YGR088W	CTT1	0.949232	0.643204	0.583637	0.66342	0.6805	0.812454	0.640827	0.691716	0.831267	0.75672
YBR218C	PYC2	0.447208	0.307807	0.403023	0.390352	0.527716	0.491656	0.53576	0.407285	0.568493	0.604496
YKL035W	UGP1	0.713117	0.491942	0.561692	0.650587	0.731185	0.850444	0.814668	0.676022	0.87622	0.797377
YLR304C	ACO1	0.639576	0.441818	0.366261	0.496692	0.640144	0.664921	0.610083	0.445457	0.64285	0.54551
YDR531W	YDR531W	0.856435	0.599766	0.653384	0.669339	0.920261	0.722761	0.856934	0.698528	0.87252	0.80688
YDL198C	GGC1	0.861545	0.605475	0.589684	0.592779	0.579743	0.585927	0.780033	0.490763	0.744217	0.908808
YLL028W	TPO1	0.409633	0.288551	0.281538	0.52187	0.477923	0.492525	0.421459	0.468357	0.619894	0.636615
YJR154W	YJR154W	0.895518	0.632744	0.671234	0.733738	0.892074	0.737641	0.793223	0.720373	0.797986	0.800198
YPL092W	SSU1	0.822628	0.585524	0.613171	0.71011	0.843233	0.700789	0.898371	0.558131	0.952068	0.938928
YOR044W	YOR044W	0.638395	0.462756	0.561898	0.608656	0.654534	0.610719	0.725376	0.490679	0.680435	0.733203
YDR158W	HOM2	0.69318	0.503416	0.511559	0.451801	0.569295	0.45744	0.648551	0.510562	0.653502	0.682754
YMR120C	ADE17	0.756598	0.549847	0.703357	0.666705	0.852925	0.763103	0.871545	0.5747	0.974623	0.920043
YPR145W	ASN1	0.478991	0.351143	0.221127	0.466054	0.465975	0.424195	0.488436	0.433682	0.656097	0.600144
YLL027W	ISA1	0.49539	0.363424	0.418949	0.494986	0.567125	0.595032	0.555217	0.437692	0.626488	0.720929
YBL101C	ECM21	0.892641	0.65789	0.654599	0.710781	0.81019	0.853527	0.844858	0.668668	0.841644	1.00206
YGR043C	YGR043C	0.706786	0.521032	0.562222	0.67929	0.70731	0.71627	0.67054	0.697426	0.829979	0.799928
YEL071W	DLD3	0.756484	0.559725	0.259065	0.509912	0.6192	0.491576	0.687605	0.385059	0.652897	0.598438
YNL311C	SKP2	1.09672	0.81329	0.713879	0.74269	0.718998	0.783431	0.743643	0.631638	0.815199	0.868899
YBL043W	ECM13	0.450769	0.335028	0.339943	0.424289	0.388846	0.389958	0.362995	0.397013	0.52335	0.331162
YBR147W	YBR147W/RTC2	0.923783	0.68686	0.791729	0.743035	0.905682	0.73985	0.893373	0.617863	0.907538	0.800839
YOR220W	WSP1	0.923997	0.687124	0.677605	0.827862	0.999159	0.916935	0.965238	0.831181	0.983201	0.948546
YDL170W	UGA3	0.656297	0.488625	0.454465	0.582532	0.633803	0.591099	0.629005	0.461383	0.648118	0.681593
YJR130C	STR2	0.846905	0.632503	0.689165	0.817502	1.04014	0.822425	0.879558	0.658592	0.881001	0.949737
YCL027W	FUS1	0.886596	0.666662	0.890657	0.960851	1.1209	0.986647	1.0536	0.93955	1.0598	1.19114
YIR017C	MET28	0.804017	0.605846	0.569427	0.546788	0.654808	0.540513	0.712637	0.489476	0.771509	0.612321
YBL103C	RTG3	0.982743	0.741046	0.706701	0.851798	0.899725	0.82413	0.827376	0.706301	0.973368	0.824499
YDR035W	ARO3	0.758662	0.579939	0.70778	0.643778	0.836482	0.747407	0.815451	0.592749	0.720559	1.11127
YJL052W	TDH1	0.882089	0.675791	0.590526	0.728961	0.769611	0.802609	0.883924	0.705322	0.917264	0.883472
YIL165C	YIL165C	1.05006	0.804748	0.854497	0.928086	1.03188	0.892949	0.944233	0.76496	0.97609	0.958459
YLR058C	SHM2	0.751292	0.576035	0.689615	0.903925	0.812823	0.890474	0.842401	0.730785	1.01357	0.934818
YCL064C	CHA1	0.745338	0.57415	0.603767	0.679447	0.745476	0.815546	0.616514	0.632867	0.715843	0.755587
YGL125W	MET13	0.492643	0.37955	0.271647	0.189555	0.332247	0.156077	0.30721	0.170865	0.251766	0.280025
YLR290C	YLR290C	0.699078	0.539275	0.578041	0.786833	0.878609	0.72948	0.734676	0.659677	0.794685	0.901073
YLR152C	YLR152C	1.00789	0.780531	0.831278	0.953758	0.908327	0.963443	0.870053	0.774176	0.877841	0.904744
YGR065C	VHT1	0.893491	0.692037	0.691428	0.805489	0.780198	0.765112	0.85388	0.593069	0.917838	0.8753
YMR173W	DDR48	0.629455	0.487569	0.510462	0.611631	0.577303	0.628979	0.623773	0.513325	0.66178	0.770194
YIR034C	LYS1	1.02236	0.792365	0.803177	0.793035	0.80757	0.785912	0.832405	0.703935	0.83604	0.890456
YML116W	ATR1	0.841563	0.660334	0.726372	0.802665	0.890166	0.781515	0.868612	0.685599	0.953688	1.00755
YDR481C	PHO8	1.29707	1.01828	0.752338	0.754977	0.74307	0.836969	0.69943	0.739914	0.787142	0.756493
YHR071W	PCL5	0.652954	0.512775	0.402279	0.297459	0.365007	0.386268	0.492298	0.335238	0.419365	0.521791
YER090W	TRP2	0.771162	0.609755	0.657281	0.683735	0.796774	0.713055	0.791708	0.660335	0.829526	0.787753
YKL033W-A	YKL033W-A	0.858287	0.679925	0.792828	0.803049	0.95653	0.81777	0.896522	0.657847	0.894623	1.02018
YHL021C	FMP12	1.28844	1.0217	0.958579	1.08361	1.02995	1.15686	1.09077	1.03615	1.10536	1.05015
YDR019C	GCV1	0.98876	0.785275	0.835669	0.911013	0.922149	1.12574	1.00201	0.841083	1.18525	1.26171
YCL009C	ILV6	1.44759	1.15546	0.888403	0.645358	0.866512	0.733164	0.852042	0.564298	0.865377	0.959104
YDL222C	FMP45	0.904557	0.723981	0.598584	0.544132	0.714434	0.713265	0.682092	0.568944	0.692165	0.849713
YMR316W	DIA1	1.11161	0.890549	0.605663	0.793523	0.911435	0.890237	1.0057	0.887823	1.03649	0.928159
YEL063C	CAN1	0.585706	0.470317	0.462628	0.574788	0.664288	0.643778	0.667494	0.515832	0.710314	0.725893
YER091C	MET6	0.521645	0.419953	0.474219	0.485931	0.541734	0.422283	0.614666	0.396585	0.517031	0.607316
YER024W	YAT2	0.861811	0.695756	0.683512	0.699759	0.795418	0.693196	0.798912	0.57528	0.683432	0.675721
YGL224C	SDT1	0.761249	0.616908	0.651323	0.619998	0.725899	0.608466	0.801003	0.558754	0.670826	0.819748
YDL066W	IDP1	1.50497	1.22012	0.908863	0.924868	0.909745	0.937739	0.992857	0.823048	1.02242	0.96857
YBR256C	RIB5	0.898079	0.729201	0.739601	0.728492	0.837025	0.792841	1.05217	0.700379	0.966529	1.06604
YHR029C	YHI9	0.61994	0.505038	0.706799	0.771946	0.959499	0.747531	0.828575	0.587175	0.866058	0.788896
YGL185C	YGL185C	1.0297	0.83988	0.907579	0.853255	0.872017	0.96255	0.940082	0.695402	0.894456	1.00344
YMR189W	GCV2	0.951555	0.778295	0.835008	0.905341	0.888242	0.894153	0.970148	0.750772	1.06482	0.95927
YKL103C	LAP4	0.669141	0.547613	0.603687	0.545147	0.805213	0.610468	0.841153	0.514449	0.693472	0.735027
YJL060W	BNA3	0.969019	0.796132	0.790181	0.870925	0.886201	0.793063	0.910357	0.831775	0.889274	1.01925
YHR137W	ARO9	0.690371	0.56824	0.5221	0.565284	0.635911	0.689823	0.605213	0.593139	0.624982	0.708388
YMR232W	FUS2	0.764783	0.63	0.775862	0.826566	0.849755	0.860889	0.863548	0.781246	0.886879	0.885092
YOL016C	CMK2	1.12834	0.931841	0.742535	0.951814	1.07531	1.03377	1.03879	0.933464	1.1502	1.0534
YOR173W	DCS2	1.00499	0.830175	0.937445	0.831625	1.12638	1.03644	1.16062	0.864564	1.10358	1.2166
YHR030C	SLT2	0.67344	0.556865	0.587184	0.686493	0.850334	0.780302	0.818962	0.679465	0.738133	0.957092
YLR178C	TFS1	1.15245	0.956981	0.977077	0.828102	1.11048	1.07951	1.20451	0.876986	1.15234	1.17041
YDR533C	HSP31	0.731552	0.607608	0.638302	0.66722	0.840276	0.754647	0.841596	0.613696	0.782399	0.92895
YOR136W	IDH2	0.614742	0.51157	0.470088	0.43698	0.531834	0.63156	0.572863	0.480769	0.703197	0.658155
YGL148W	ARO2	1.24027	1.03439	0.789497	0.766177	0.904217	0.844865	0.918209	0.73054	0.903375	0.92843
YIL113W	SDP1	0.981865	0.82185	0.766367	0.831917	0.812255	0.911983	0.868239	0.862901	0.913968	0.815799
YDR461C-A	YDR461C-A	1.15926	0.972549	0.829814	0.85237	1.04753	1.00921	1.04417	0.914579	1.01449	1.00044
YKL128C	PMU1	0.807358	0.682847	0.637336	0.660753	0.857415	0.675798	0.808345	0.659919	0.795848	0.868664
YBR104W	YMC2	0.747176	0.633875	0.596872	0.666334	0.789736	0.689277	0.855863	0.627421	0.785921	0.798865
YJL200C	ACO2	0.639329	0.544671	0.522581	0.578588	0.633234	0.627112	0.628983	0.514884	0.674895	0.619834
YDR242W	AMD2	0.822118	0.701642	0.730243	0.810091	1.00195	0.860708	0.99718	0.71496	0.94994	1.12662
YGL062W	PYC1	0.476556	0.407076	0.191423	0.274569	0.352388	0.304551	0.310022	0.293095	0.354711	0.39466
YPL269W	KAR9	0.955044	0.81633	0.815703	0.87851	0.853066	0.862088	0.911444	0.740806	0.818976	0.903355
YJL071W	ARG2	1.08009	0.923754	0.907181	0.934501	1.00038	0.931313	1.09346	0.869557	0.964652	0.969463
YPL273W	SAM4	0.745187	0.638501	0.588008	0.636219	0.746986	0.758043	0.75121	0.624681	0.845665	0.856569
YMR250W	GAD1	0.974962	0.835396	0.774604	0.915546	0.970365	1.06865	1.03942	0.836178	1.03224	0.980404
YOL047C	YOL047C	0.77165	0.661837	0.631597	0.656826	0.844442	0.808234	0.788432	0.64981	0.678952	0.958376
YNR056C	BIO5	1.21671	1.04504	1.02004	0.901318	0.86437	0.864126	0.894258	0.771088	0.890825	1.09693
YLR089C	ALT1	0.895326	0.771977	0.56402	0.643245	0.890351	0.854589	0.822446	0.687886	0.861631	0.905527
YDR011W	SNQ2	0.559122	0.482732	0.399059	0.510688	0.534647	0.57624	0.502592	0.472878	0.581034	0.638951
YAL028W	FRT2	0.725377	0.627448	0.668239	0.724907	0.793015	0.861394	0.855996	0.702632	0.831439	0.735329
YGL059W	YGL059W	0.955646	0.82699	0.882521	0.825812	1.03292	0.912865	0.960163	0.773911	0.896313	0.934177
YFL029C	CAK1	1.02436	0.886728	0.91506	0.987803	1.01481	1.03532	1.09572	0.960007	1.14351	1.17122
YGR066C	YGR066C	0.888591	0.772933	0.923804	0.927905	1.06385	1.05251	1.05003	0.985642	1.05652	1.10539
YBR166C	TYR1	0.81087	0.707065	0.719832	0.758291	0.868265	0.838866	0.789417	0.633226	0.863294	0.915755
YGR019W	UGA1	0.904952	0.789751	0.779034	0.757427	0.915867	0.830353	0.874362	0.749105	0.802313	1.04862
YER086W	ILV1	0.838124	0.732139	0.836976	0.860637	1.09734	0.877545	0.84465	0.84939	0.991305	0.965472
YIL164C	NIT1	1.04123	0.910997	0.870108	0.938446	1.09452	1.00193	0.995757	0.77888	0.962019	1.07294
YBR214W	SDS24	1.17302	1.02649	0.806894	0.79927	0.791595	0.873183	0.900891	0.738561	0.828177	0.937676
YOR184W	SER1	0.540311	0.475934	0.481672	0.489751	0.697807	0.600786	0.673221	0.467595	0.640737	0.722087
YNL279W	PRM1	0.66031	0.583948	0.711822	0.748993	0.848259	0.762721	0.783506	0.643558	0.806854	0.881319
YDR119W-A	YDR119W-A	0.711134	0.631511	0.57314	0.697434	0.705258	0.711272	0.672024	0.653135	0.80584	0.796074
YHR047C	AAP1	0.681236	0.607226	0.651668	0.680919	0.671059	0.734929	0.733169	0.62128	0.680104	0.90224
YFL028C	CAF16	0.802056	0.716831	0.772002	0.798696	0.832367	0.783923	0.904058	0.708098	0.910937	1.00315
YLR327C	TMA10	1.05529	0.943635	0.880297	0.83538	0.945385	0.91664	0.969764	0.967334	1.04712	0.88664
YIL136W	OM45	1.47379	1.3183	1.18324	1.14469	1.20517	1.26162	1.15695	1.14039	1.08921	1.23157
YPL188W	POS5	0.738401	0.662443	0.718898	0.794748	0.889559	0.767799	0.840724	0.6784	0.905823	1.09277
YJR153W	PGU1	0.836692	0.755578	0.97143	0.99309	0.93563	0.929408	0.877008	1.01107	1.00376	0.835928
YDR425W	SNX41	1.16118	1.04965	1.00477	1.04607	1.05152	1.09009	1.05219	1.0318	1.12018	1.35156
YLR027C	AAT2	1.05477	0.955666	0.865802	0.725318	1.01979	0.897876	0.924385	0.748065	0.981675	1.15013
YJR111C	YJR111C	0.945064	0.857357	0.739751	0.799176	0.975759	0.866338	0.911779	0.694437	0.984999	0.949965
YJL170C	ASG7	0.858754	0.785813	0.917477	0.887133	1.158	1.04478	1.07809	0.959414	1.1591	1.02169
YDL054C	MCH1	0.874844	0.803948	0.667694	0.755848	0.804561	0.788076	0.800912	0.756859	0.834174	0.999853
YNL220W	ADE12	0.736418	0.677089	0.70352	0.759605	0.88272	0.724327	0.790957	0.718285	0.850417	0.935589
YGL026C	TRP5	0.88151	0.811184	0.685879	0.718536	0.681515	0.605445	0.872264	0.675442	0.811779	1.00734
YLR267W	BOP2	1.19947	1.10922	0.855695	1.08183	1.02011	1.19755	1.01492	1.17114	1.04411	0.942087
YDR482C	CWC21	0.966938	0.894544	0.77913	0.825939	0.841269	0.794693	0.876521	0.708255	0.878976	0.908982
YGR248W	SOL4	0.829624	0.768945	0.760741	0.777653	0.92564	0.886175	0.923831	0.805113	0.98555	0.936967
YLR211C	YLR211C	0.920211	0.854061	0.851905	0.925341	1.08096	0.992068	0.934776	0.92474	1.1029	1.01313
YGL181W	GTS1	0.891422	0.82887	0.833908	0.839455	0.950746	0.801422	0.944555	0.756457	0.871089	0.877663
YJL161W	FMP33	1.00979	0.939115	1.00257	1.08252	1.24248	1.14312	1.07973	1.0245	1.20669	1.17706
YDR258C	HSP78	0.596642	0.556474	0.43975	0.540212	0.70448	0.519852	0.664828	0.525278	0.647915	0.72408
YOR100C	CRC1	0.971399	0.90977	0.799645	0.799257	0.815915	0.941309	0.816605	0.857712	0.968487	0.925428
YBR035C	PDX3	1.05607	0.990752	1.06791	0.972461	1.1857	1.14256	1.21384	0.949243	1.15142	1.43557
YER037W	PHM8	0.472706	0.444991	0.472596	0.485455	0.669823	0.585696	0.608574	0.547846	0.619631	0.689086
YJL213W	YJL213W	0.613833	0.578803	0.589312	0.609124	0.71232	0.63074	0.685466	0.574893	0.689997	0.967826
YFR030W	MET10	1.01758	0.965807	0.876213	0.817748	0.882202	0.796856	0.913616	0.71845	0.891858	0.861712
YOL140W	ARG8	0.872884	0.830859	0.650698	0.667644	0.79687	0.680928	0.802236	0.618391	0.757874	0.702242
YOL064C	MET22	1.09967	1.0489	0.942773	0.892518	1.09881	0.872431	0.989044	0.848713	1.0489	1.154
YJR035W	RAD26	0.51838	0.497185	0.661553	0.714569	0.805488	0.69752	0.644252	0.752464	0.747216	0.896354
YFR045W	YFR045W	1.04095	1.00482	0.836164	0.963296	1.08327	1.01417	1.02163	0.901854	1.03492	1.02448
YAL048C	GEM1	0.906416	0.875888	0.943423	1.0707	1.1183	0.966589	0.991279	0.932095	1.1022	1.11195
YDR487C	RIB3	0.669613	0.648182	0.461919	0.423452	0.545852	0.45631	0.549532	0.487031	0.549081	0.541518
YKL218C	SRY1	1.0963	1.06167	0.959392	0.973409	0.992395	0.981004	0.951369	1.01885	0.938967	0.933365
YGL180W	ATG1	0.687871	0.668065	0.896298	0.939094	1.21729	0.898983	1.0702	0.941812	1.06864	1.01776
YNR034W	SOL1	0.71236	0.695417	0.675752	0.761042	0.914236	0.76851	0.802692	0.709145	0.726398	0.966866
YIL094C	LYS12	0.73559	0.71828	0.628121	0.600788	0.668499	0.622894	0.700452	0.505827	0.715935	0.896077
YBR105C	VID24	0.509353	0.502762	0.462847	0.483983	0.508295	0.464918	0.521454	0.442763	0.57961	0.610234
YIL152W	YIL152W	0.843526	0.835626	0.789339	0.794659	0.990012	0.841123	0.969086	0.809333	1.11598	0.949635
YNL310C	ZIM17	1.22344	1.21227	0.999101	0.934045	1.15938	1.0833	1.1077	1.07306	1.05582	0.996253
YDL223C	HBT1	1.23727	1.23191	0.863139	0.798327	0.773303	0.938419	0.838833	0.931452	0.934812	0.889986
YGL025C	PGD1	1.00005	0.999556	0.879661	0.823204	0.926257	0.8854	0.824662	0.782887	0.86264	1.00577
YGR288W	MAL13	0.969471	0.973581	0.806075	0.882299	0.921762	0.8497	0.893009	0.824926	0.932019	1.05202
YHL036W	MUP3	0.95107	0.955809	0.934503	1.04009	1.06552	0.989879	1.15937	1.00262	1.07302	1.07156
YHR096C	HXT5	0.748825	0.758968	1.04199	1.02916	1.24335	0.96095	1.02156	1.16513	1.28609	1.19114
YMR096W	SNZ1	0.825757	0.848342	0.891067	0.917103	0.89216	0.876617	0.944949	0.965593	0.952178	0.994981
YOL091W	SPO21	0.530169	0.549871	0.701679	0.778106	0.894775	0.723744	0.825448	0.755527	0.827703	0.905298
YDR236C	FMN1	1.26714	1.36719	1.1888	1.07648	1.08194	1.04782	1.03368	1.02244	1.03845	1.22169
YJR155W	AAD10	0.892004	0.963856	0.910977	0.898313	0.891011	0.929953	0.881895	0.902585	0.807333	0.722481
YER040W	GLN3	0.975714	1.07213	0.768495	0.819908	0.873751	0.888454	1.0136	0.719802	0.882766	0.884157
	Mean	0.83064	0.63126	0.635549	0.697595	0.785117	0.747003	0.784089	0.638111	0.816101	0.856084
	SD	0.229304	0.254043	0.224732	0.208413	0.232344	0.215567	0.222161	0.221081	0.21708	0.219328
	SEM	0.0160545	0.0177865	0.0157344	0.0145918	0.0162673	0.0150927	0.0155544	0.0154788	0.0151987	0.015356
	CI	0.0314245	0.0348551	0.0308756	0.0285428	0.0318362	0.0296406	0.0304639	0.0303267	0.0297778	0.0300523
	rel to WT-I	1.31639	1.00041	1.00721	1.10554	1.24424	1.18384	1.24261	1.01127	1.29335	1.35671

## Sheet: 4744genes_3zones
Avg H3 Occ. in combined [-1,NDR,+1] zones for 4744 weakly induced or non-induced genes
Systematic name	Common name	WT-U	WT-I	ydj1∆-I	snf2∆-I	gcn5∆-I	snf2∆ydj1∆/lcGCN4-I	gcn5∆ydj1∆-I	Ptet-SNF2-I	Ptet-SNF2gcn5∆-I	Ptet-SNF2gcn5∆ydj1∆/lcGCN4-I
YAL001C	TFC3	0.898052	0.802727	0.822922	0.852436	1.07413	0.829252	0.97476	0.946428	1.09148	1.08976
YAL002W	VPS8	0.646517	0.638527	0.67365	0.737559	0.877158	0.76041	0.807051	0.776651	0.898614	0.863209
YAL003W	EFB1	0.378792	0.446486	0.387316	0.550864	0.689938	0.653233	0.624159	0.462338	0.581321	0.511629
YAL005C	SSA1	0.383906	0.452551	0.393707	0.555465	0.696019	0.65939	0.630479	0.443613	0.540018	0.496818
YAL007C	ERP2	1.11375	1.03764	1.00726	1.05238	1.25705	1.23152	1.13115	0.924722	1.09028	0.951991
YAL008W	FUN14	1.13328	1.07134	1.05111	1.08539	1.27477	1.1311	1.13328	1.03998	1.0067	0.964932
YAL009W	SPO7	1.36161	1.32078	1.28125	1.30549	1.49697	1.25049	1.37629	0.727378	0.827586	0.817724
YAL010C	MDM10	1.36161	1.32078	1.28125	1.30549	1.49697	1.25049	1.37629	0.779361	0.993861	0.865452
YAL011W	SWC3	1.24165	1.17957	1.10989	1.06617	1.09067	1.14392	1.15439	0.881495	0.960402	0.917466
YAL012W	CYS3	0.871269	0.823931	0.853023	0.783609	0.793887	0.876858	0.967958	0.85966	0.861367	0.981868
YAL013W	DEP1	1.33446	1.30792	1.03464	1.00648	1.30971	1.11013	1.21935	0.791798	1.15372	1.03104
YAL015C	NTG1	0.967112	0.934659	0.916805	0.906165	1.0428	0.984715	1.00349	0.793333	0.852344	0.891879
YAL016W	TPD3	1.19373	1.14668	1.05792	1.11386	1.18511	1.1106	1.13245	0.970861	1.0417	1.00426
YAL017W	PSK1	0.86636	0.892843	0.901076	0.937762	1.11901	0.998772	0.986696	0.59138	0.666203	0.783958
YAL018C	YAL018C	0.86636	0.892843	0.901076	0.937762	1.11901	0.998772	0.986696	0.547129	0.738284	0.764912
YAL019W	FUN30	1.44928	1.48805	1.0808	1.04788	1.16439	1.14458	1.0979	0.703765	0.712539	0.745876
YAL020C	ATS1	1.44928	1.48805	1.0808	1.04788	1.16439	1.14458	1.0979	0.392078	0.6365	0.780661
YAL021C	CCR4	1.34391	1.31672	1.05334	0.917667	1.12274	1.01101	0.946251	0.917398	0.960557	0.93215
YAL022C	FUN26	0.899291	0.878499	0.90663	0.93658	1.13825	1.0413	1.08061	0.73163	0.761521	0.859591
YAL023C	PMT2	1.09156	1.0879	0.826662	0.801372	0.890799	0.962519	0.927755	0.541935	0.863012	0.826935
YAL024C	LTE1	0.834968	0.83865	0.870692	0.991878	1.12466	1.01165	0.992043	0.788269	0.954362	1.1514
YAL025C	MAK16	0.667214	0.649821	0.711443	0.769586	0.890437	0.810426	0.792232	0.776753	0.855344	1.16326
YAL026C	DRS2	0.817258	0.885777	0.890217	0.924842	0.9504	0.946418	0.934998	0.435533	0.611256	0.538118
YAL027W	YAL027W	1.04331	0.956843	0.998117	1.09567	1.24787	1.18584	1.23343	0.92515	1.01443	1.07252
YAL029C	MYO4	0.725377	0.627448	0.668239	0.724907	0.793015	0.861394	0.855996	0.849109	0.898632	0.861621
YAL030W	SNC1	1.21118	1.06074	0.976252	1.0949	1.20708	1.22554	1.08461	0.923962	0.985489	1.13653
YAL031C	GIP4	1.21118	1.06074	0.976252	1.0949	1.20708	1.22554	1.08461	0.923962	0.985489	1.13653
YAL032C	PRP45	0.81895	0.838754	0.764848	0.765782	1.01984	0.878784	0.87184	0.621319	0.811563	0.725316
YAL033W	POP5	1.34101	1.35431	1.21702	1.24557	1.40607	1.37209	1.55382	0.555913	0.860805	0.867888
YAL034C	FUN19	1.24523	1.12965	0.954615	0.96541	1.19994	1.17705	1.09664	0.553829	0.616343	0.670804
YAL034W-A	MTW1	1.15332	1.16217	1.15048	1.09446	1.22106	1.213	1.20966	0.570243	0.63449	0.735095
YAL035W	FUN12	1.23006	1.32795	1.13368	1.03184	1.2417	1.23377	1.26824	0.458984	0.558941	0.527113
YAL036C	RBG1	1.23006	1.32795	1.13368	1.03184	1.2417	1.23377	1.26824	0.694485	0.733649	0.669153
YAL038W	CDC19	0.36648	0.380425	0.432674	0.729782	0.632261	0.722852	0.650639	0.674344	0.710402	0.633657
YAL039C	CYC3	0.842757	0.774398	0.654734	0.757541	0.912848	0.871918	0.862739	0.828099	1.01195	1.17415
YAL040C	CLN3	0.478119	0.312098	0.4024	0.600628	0.640997	0.704659	0.506792	0.857712	0.968487	0.925428
YAL041W	CDC24	1.14072	1.05829	0.921785	0.84673	0.94565	0.930972	1.02742	0.782539	0.819849	0.897612
YAL042W	ERV46	1.41738	1.38161	0.993509	0.909936	0.921488	0.987997	0.941562	0.787273	0.882149	0.920058
YAL043C	PTA1	1.41738	1.38161	0.993509	0.909936	0.921488	0.987997	0.941562	0.827785	0.942452	1.02941
YAL046C	YAL046C	1.62927	1.52849	1.34874	1.20759	1.49191	1.42041	1.34457	0.772264	0.871479	0.948488
YAL047C	SPC72	1.24658	1.18539	1.12978	1.01831	1.15394	1.02763	1.12765	0.878708	0.876923	1.08309
YAL051W	OAF1	0.701128	0.672496	0.712195	0.745684	0.939857	0.830327	0.8804	0.917516	0.95059	1.02711
YAL053W	FLC2	0.416233	0.374043	0.440549	0.432094	0.487255	0.476153	0.477211	1.02523	1.13444	1.12506
YAL054C	ACS1	0.416233	0.374043	0.440549	0.432094	0.487255	0.476153	0.477211	0.835037	0.897875	0.900944
YAL055W	PEX22	0.809402	0.800464	0.802742	0.813651	0.958494	1.00361	0.910617	0.97709	1.10231	1.24169
YAL056W	GPB2	1.02977	1.00927	0.91805	0.986544	1.01499	0.999623	0.974164	1.0748	1.16658	1.02354
YAL058W	CNE1	0.884417	0.836828	0.859991	0.985207	0.891014	0.923801	0.984808	1.08851	1.30126	1.2569
YAL059W	ECM1	0.819713	0.761538	0.96784	0.983452	1.09974	1.01794	1.09465	1.07268	1.15872	1.10835
YAL060W	BDH1	0.931162	0.853513	0.817586	0.84552	0.97667	1.03356	0.993949	0.890754	0.904834	1.02533
YAL062W	GDH3	0.513936	0.488522	0.643376	0.701575	0.780848	0.721029	0.855035	0.770511	0.929987	1.00485
YAL063C	FLO9	0.950592	0.847466	1.01598	1.18919	1.11452	1.04305	1.09021	0.80703	0.755496	0.755705
YAL063C-A	YAL063C-A	0.781279	0.816525	0.858281	0.916342	0.889965	0.903454	0.815244	0.524772	0.711018	0.643539
YAL064C-A	YAL064C-A	0.809173	0.828507	0.759524	0.731409	0.81637	0.798827	0.771021	0.569767	0.779698	0.879533
YAL064W	YAL064W	0.405518	0.379103	0.404433	0.513508	0.52216	0.555232	0.429469	0.863615	0.922453	1.04472
YAL065C	YAL065C	0.715506	0.684694	0.710496	0.670284	0.603061	0.688466	0.696638	0.688313	0.763136	0.938157
YAL067W-A	YAL067W-A	0.931107	0.959173	0.966127	1.00356	1.02007	1.09744	1.04968	0.658886	0.821172	0.700393
YAL068C	PAU8	0.931107	0.959173	0.966127	1.00356	1.02007	1.09744	1.04968	0.644835	0.801447	0.769878
YAR002C-A	ERP1	0.960819	0.941521	0.932128	1.03324	1.01647	1.03512	1.02937	0.791917	0.842845	0.818462
YAR002W	NUP60	0.776013	0.693353	0.788985	0.819292	0.954039	0.942231	0.929408	1.23908	1.20611	1.36697
YAR003W	SWD1	0.960819	0.941521	0.932128	1.03324	1.01647	1.03512	1.02937	0.726348	0.961521	0.8959
YAR007C	RFA1	1.25513	1.20062	1.16379	1.20283	1.29987	1.20184	1.18984	0.613403	0.669641	0.88794
YAR008W	SEN34	1.25513	1.20062	1.16379	1.20283	1.29987	1.20184	1.18984	0.837739	0.966139	0.889064
YAR014C	BUD14	1.25997	1.18933	1.17124	1.19462	1.21493	1.19402	1.22601	0.848535	0.951413	0.892823
YAR015W	ADE1	1.25997	1.18933	1.17124	1.19462	1.21493	1.19402	1.22601	0.834868	0.969429	1.0662
YAR018C	KIN3	0.909442	0.968461	0.910096	1.07937	1.11307	1.11233	1.02792	0.459587	0.582955	0.596966
YAR019C	CDC15	1.60334	1.41248	1.25214	1.26033	1.27471	1.37636	1.31363	0.871066	1.07555	1.05043
YAR023C	YAR023C	1.07523	1.0343	1.0265	1.17247	1.15912	1.08289	1.1729	0.812854	0.879507	0.790259
YAR028W	YAR028W	1.16181	1.01838	0.946627	0.964164	1.05909	1.06755	1.14883	1.08127	1.08136	1.15122
YAR029W	YAR029W	0.964968	0.967746	1.0921	1.11087	1.15994	1.02596	1.08125	0.645177	0.804628	0.783238
YAR031W	PRM9	1.19563	1.10388	1.19163	1.25997	1.26489	1.18968	1.22167	0.611982	0.726853	0.73362
YAR033W	MST28	1.10124	1.12472	1.0132	1.09413	1.23967	1.11449	1.09346	0.733457	0.72526	0.840354
YAR035W	YAT1	0.866948	0.974297	1.01683	1.01438	1.18324	1.008	0.981319	0.323562	0.434523	0.34672
YAR042W	SWH1	0.842894	0.779188	0.780933	0.737358	0.75043	0.764707	0.778145	0.837748	1.08417	1.00102
YAR050W	FLO1	0.928731	0.83475	0.864941	1.00378	0.867334	0.996897	0.841327	0.821908	1.01912	0.814342
YBL001C	ECM15	0.760178	0.684584	0.612029	0.642951	0.90793	0.716043	0.888999	1.15394	1.08698	1.03442
YBL002W	HTB2	0.475892	0.422911	0.417894	0.500722	0.61362	0.5855	0.578113	1.01383	1.09677	1.20672
YBL003C	HTA2	0.320115	0.312289	0.293688	0.362909	0.426942	0.405358	0.43673	1.046	1.096	1.20483
YBL004W	UTP20	0.854103	0.820381	0.733751	0.812241	0.899896	0.806679	0.927288	0.705798	0.760445	0.755735
YBL005W	PDR3	1.18109	1.07734	0.882734	0.928637	1.06341	1.01548	0.98826	0.907624	0.946627	0.818732
YBL006C	LDB7	1.18109	1.07734	0.882734	0.928637	1.06341	1.01548	0.98826	0.958474	1.04111	1.05154
YBL007C	SLA1	1.04976	0.988613	0.823043	0.794472	1.00304	0.942236	0.975684	0.805539	0.94012	0.863517
YBL008W	HIR1	1.03957	0.973028	0.976993	1.09682	1.03355	1.05919	1.04113	0.755528	0.893985	0.857211
YBL009W	YBL009W	1.00008	1.00844	0.997403	0.974234	1.08013	1.03923	0.983793	0.644688	0.707053	0.792046
YBL010C	YBL010C	1.00008	1.00844	0.997403	0.974234	1.08013	1.03923	0.983793	0.78491	0.894031	0.880325
YBL011W	SCT1	0.63931	0.600313	0.550052	0.520208	0.646376	0.588176	0.646137	0.819087	0.992946	1.07636
YBL013W	FMT1	0.951338	0.918513	0.759899	0.752336	0.959773	0.783306	0.946759	0.808686	0.84979	0.88204
YBL014C	RRN6	0.951338	0.918513	0.759899	0.752336	0.959773	0.783306	0.946759	0.879472	0.965621	1.16343
YBL015W	ACH1	1.40001	1.32949	1.11865	1.04535	1.22742	1.15924	1.17739	0.78026	0.905816	0.832769
YBL016W	FUS3	0.734702	0.609108	0.724389	0.80477	0.972372	0.859393	0.996878	0.858662	0.87912	1.10006
YBL017C	PEP1	0.79784	0.618696	0.594068	0.713919	0.816109	0.738148	0.927123	1.08962	1.06985	1.14953
YBL018C	POP8	1.00056	0.848872	0.861944	0.957055	1.02172	1.03093	0.884069	1.16387	1.0963	1.25549
YBL019W	APN2	0.982744	0.849696	0.959623	1.10918	1.12113	0.95715	0.921908	0.792058	0.982299	0.936555
YBL020W	RFT1	1.19832	1.26935	1.02789	0.949639	1.01799	1.03976	1.07061	0.712641	0.716057	0.771684
YBL021C	HAP3	1.19832	1.26935	1.02789	0.949639	1.01799	1.03976	1.07061	0.598852	0.744133	0.71659
YBL022C	PIM1	1.21693	1.18739	0.93995	0.882157	0.999278	1.02677	1.06057	0.766603	0.870314	1.15449
YBL023C	MCM2	0.770232	0.733702	0.829595	0.900278	0.896307	0.862616	0.868734	0.909691	0.953526	1.06192
YBL024W	NCL1	0.847105	0.77845	0.822116	0.869974	1.02922	0.943819	0.904001	0.849347	0.914556	1.11867
YBL025W	RRN10	0.789364	0.78643	0.829371	1.01147	1.07736	0.98055	1.04612	0.636898	0.933575	0.918876
YBL026W	LSM2	0.921842	0.859223	0.904732	0.90802	1.13629	0.894706	1.02946	0.883002	1.12966	1.07726
YBL027W	RPL19B	0.431797	0.424458	0.448736	0.456256	0.549161	0.547047	0.563976	0.914457	1.07219	0.934089
YBL028C	YBL028C	0.431797	0.424458	0.448736	0.456256	0.549161	0.547047	0.563976	0.914457	1.07219	0.934089
YBL029C-A	YBL029C-A	0.331844	0.301126	0.280534	0.416111	0.332338	0.445722	0.305837	0.786238	0.918233	0.921276
YBL029W	YBL029W	0.532498	0.462472	0.510972	0.611893	0.530582	0.741195	0.564099	0.995462	1.02982	1.2024
YBL030C	PET9	0.508247	0.51079	0.490221	0.458931	0.624111	0.516383	0.557063	0.500837	0.81634	1.00765
YBL031W	SHE1	0.651232	0.607363	0.649319	0.7439	0.796132	0.72974	0.746134	0.840764	0.876841	0.978176
YBL032W	HEK2	0.687567	0.663052	0.569947	0.496105	0.579342	0.527228	0.68527	0.852155	0.912019	1.03857
YBL034C	STU1	0.906781	0.845182	0.857826	0.885492	0.843457	0.825758	0.931397	1.11521	0.944041	0.978338
YBL035C	POL12	0.673396	0.713279	0.707733	0.834011	0.928331	0.801812	0.892179	0.598852	0.744133	0.71659
YBL036C	YBL036C	0.834993	0.857647	0.721694	0.826642	0.904289	0.878859	0.815498	0.697902	0.838994	0.903884
YBL037W	APL3	0.747584	0.775762	0.761302	0.904351	0.813933	0.860947	0.856474	0.650862	0.771655	0.731712
YBL038W	MRPL16	0.617968	0.627239	0.577733	0.650292	0.628268	0.641218	0.719066	0.395837	0.491876	0.800414
YBL039C	URA7	0.617968	0.627239	0.577733	0.650292	0.628268	0.641218	0.719066	0.550547	0.584861	0.699464
YBL040C	ERD2	0.953671	0.909815	0.80647	0.953939	0.934331	1.03335	0.988456	0.758967	0.759428	0.718862
YBL041W	PRE7	0.855964	0.825327	0.737111	0.805251	0.961155	0.80172	0.932564	0.814495	0.865222	0.800865
YBL042C	FUI1	0.405852	0.411432	0.42858	0.537552	0.553081	0.755258	0.571035	0.674555	0.812393	0.692118
YBL045C	COR1	0.449222	0.331557	0.336936	0.421281	0.384689	0.386893	0.359019	0.633226	0.863294	0.915755
YBL046W	PSY4	0.875957	0.868676	0.823805	0.861454	0.891	0.851262	0.968796	0.649562	0.851606	0.984966
YBL047C	EDE1	0.875957	0.868676	0.823805	0.861454	0.891	0.851262	0.968796	0.64636	0.856202	0.982585
YBL049W	MOH1	0.880124	0.962556	0.903583	0.849221	0.840208	0.904841	0.847603	0.659252	0.726262	0.7036
YBL050W	SEC17	0.904528	0.911022	0.81512	0.897527	1.04509	0.881729	0.949283	0.835605	0.929239	0.92429
YBL051C	PIN4	0.904528	0.911022	0.81512	0.897527	1.04509	0.881729	0.949283	0.835605	0.929239	0.92429
YBL052C	SAS3	0.647161	0.659389	0.810654	0.859158	0.942878	0.970851	0.872784	0.578811	0.893042	0.859668
YBL054W	YBL054W	0.861237	0.888486	0.797918	0.788693	0.862815	0.786546	0.759286	0.470433	0.62613	0.634438
YBL055C	YBL055C	0.960383	0.869115	0.632126	0.790009	0.727285	0.80001	0.716382	0.980966	1.04891	1.11008
YBL056W	PTC3	0.914957	0.83562	0.797659	0.865291	0.938817	0.951429	0.937054	0.964026	1.23373	1.19124
YBL057C	PTH2	0.914957	0.83562	0.797659	0.865291	0.938817	0.951429	0.937054	0.641565	0.86871	0.777987
YBL058W	SHP1	0.900676	0.922441	0.832248	0.845608	0.948087	0.782783	0.867556	0.761129	0.844445	0.759725
YBL059C-A	YBL059C-A	1.20285	1.13159	1.03889	1.12373	1.34642	1.18397	1.18471	0.740761	0.882621	0.896743
YBL059W	YBL059W	1.20285	1.13159	1.03889	1.12373	1.34642	1.18397	1.18471	0.930063	0.983577	0.873318
YBL060W	YBL060W	1.19543	1.17914	1.01976	0.99862	1.11332	1.10065	1.00589	0.691097	0.745089	0.879037
YBL061C	SKT5	0.925121	0.870407	0.892762	0.95986	1.13068	1.09731	1.12248	0.668105	0.850405	0.79534
YBL063W	KIP1	1.14276	1.11107	1.05361	1.01055	0.938368	1.01292	1.06072	0.698524	0.881164	0.775374
YBL064C	PRX1	0.68947	0.719054	0.694773	0.713674	0.851965	0.739658	0.906426	0.510954	0.706814	0.650354
YBL067C	UBP13	0.648212	0.53652	0.660517	0.720621	0.828131	0.798728	0.75583	0.936646	1.13552	1.14983
YBL068W	PRS4	0.852477	0.799124	0.903116	0.852144	0.930838	0.98072	0.987501	0.981048	1.07157	1.20778
YBL069W	AST1	0.886018	0.947214	0.903836	0.868546	1.05762	0.917911	1.02898	0.446703	0.584731	0.582139
YBL071W-A	KTI11	0.540795	0.529484	0.487591	0.473051	0.590754	0.574411	0.601409	0.770147	0.862238	0.819567
YBL072C	RPS8A	0.391759	0.372764	0.443302	0.436793	0.549429	0.581059	0.634874	0.835688	1.05644	0.906571
YBL074C	AAR2	0.815228	0.791192	0.570551	0.649813	0.914995	0.771954	0.757304	0.746928	0.937135	0.955652
YBL075C	SSA3	1.15044	1.11273	0.97957	1.11204	0.999387	1.05372	1.02983	0.665273	0.857492	1.18438
YBL076C	ILS1	0.789887	0.622966	0.64291	0.609312	0.695699	0.669604	0.636342	0.871424	1.08863	1.11078
YBL079W	NUP170	0.811602	0.728137	0.676092	0.767749	0.834132	0.813542	0.756525	0.786944	0.946292	0.9966
YBL080C	PET112	0.969409	0.950546	0.923095	0.87377	0.953321	0.92623	0.923473	0.914579	1.01449	1.00044
YBL081W	YBL081W	1.03867	0.946676	0.849525	0.887002	0.859474	0.892551	0.848169	0.180159	0.288513	0.326888
YBL082C	ALG3	1.03867	0.946676	0.849525	0.887002	0.859474	0.892551	0.848169	0.513154	0.653433	0.819641
YBL084C	CDC27	1.01569	1.00394	0.882343	0.861113	0.962015	0.946578	0.996419	0.689335	0.76056	0.81482
YBL085W	BOI1	0.896613	0.735759	0.712258	0.779609	0.957048	0.839522	0.83906	1.09319	1.03512	1.01456
YBL086C	YBL086C	0.934865	0.870126	1.00099	0.968404	1.02929	1.02858	1.05772	0.965701	0.89297	0.972343
YBL087C	RPL23A	0.465476	0.411482	0.418389	0.475304	0.569459	0.529223	0.53281	0.904931	0.890555	1.27906
YBL088C	TEL1	1.0428	0.892584	0.902732	1.06435	1.12648	1.20355	1.09405	1.05758	1.04479	1.19986
YBL089W	AVT5	1.22765	0.978609	0.859365	0.891133	0.92786	0.904218	0.884924	1.0741	1.089	1.32155
YBL090W	MRP21	0.893964	0.851126	0.9886	1.00921	1.14705	1.21043	1.12061	0.731048	0.78499	0.766587
YBL091C	MAP2	0.893964	0.851126	0.9886	1.00921	1.14705	1.21043	1.12061	0.833125	1.00304	0.898095
YBL091C-A	SCS22	1.2033	1.17673	0.954951	0.997643	0.989622	1.0314	1.02132	1.04568	1.14308	1.11528
YBL092W	RPL32	0.484707	0.425957	0.437325	0.470015	0.578785	0.542143	0.626357	1.03333	1.17762	1.17339
YBL093C	ROX3	0.484707	0.425957	0.437325	0.470015	0.578785	0.542143	0.626357	1.13582	1.22238	1.16755
YBL095W	YBL095W	0.736037	0.691406	0.675961	0.622965	0.682601	0.695799	0.732564	1.00814	1.15473	1.10717
YBL097W	BRN1	0.540338	0.538274	0.588766	0.641419	0.679784	0.714414	0.707455	0.658964	0.786032	1.02544
YBL098W	BNA4	0.630078	0.541925	0.658752	0.697282	0.722225	0.759005	0.666768	0.727998	0.9545	0.890466
YBL099W	ATP1	0.550441	0.45576	0.458654	0.420466	0.600647	0.509543	0.543488	0.428483	0.669633	0.580376
YBL104C	YBL104C	0.967279	0.823078	0.92809	0.914468	1.00074	0.951717	0.968927	0.936305	1.25588	1.25734
YBL105C	PKC1	0.920882	0.963969	0.863378	0.973313	0.948935	0.912881	0.942956	0.521082	0.715089	0.655059
YBL107C	YBL107C	0.90238	0.828396	0.856807	0.819901	0.920609	0.925011	0.875586	0.996856	1.04717	1.05502
YBR001C	NTH2	0.512343	0.458522	0.573737	0.626858	0.761455	0.642028	0.616448	1.04087	0.967481	1.03664
YBR002C	RER2	1.10523	0.981377	0.973333	0.852576	0.976368	0.922808	1.02223	0.916732	0.949196	1.01677
YBR003W	COQ1	1.10523	0.981377	0.973333	0.852576	0.976368	0.922808	1.02223	0.916732	0.949196	1.01677
YBR004C	GPI18	1.03436	0.863268	0.786288	0.960002	1.0119	1.03764	0.964684	0.940782	1.08558	1.13416
YBR006W	UGA2	0.773378	0.744855	0.740082	0.878264	0.948846	0.881558	0.869303	1.06923	1.10676	1.10897
YBR007C	DSF2	1.00176	0.919791	0.958283	0.966113	1.17935	1.00779	1.13488	0.99699	1.11464	1.00538
YBR008C	FLR1	0.608325	0.588966	0.596332	0.671359	0.796072	1.19797	0.742496	0.958426	0.998673	1.1917
YBR011C	IPP1	1.12016	0.984545	0.968909	0.938294	1.09122	0.90595	0.956867	1.06282	1.08652	1.23104
YBR014C	YBR014C	0.87409	0.702294	0.851595	0.918525	1.02636	0.874643	1.00029	1.15026	1.09406	1.32385
YBR015C	MNN2	1.20286	1.16589	0.983197	0.940805	0.918048	1.02399	0.991927	0.848894	0.996626	1.04723
YBR016W	YBR016W	1.2024	1.05885	0.881123	0.787651	0.93591	0.927691	0.968798	0.864345	0.951736	0.851927
YBR017C	KAP104	0.793963	0.76938	0.862367	1.00387	0.975995	0.922698	0.965969	0.588149	0.919478	0.80245
YBR019C	GAL10	0.703363	0.655048	0.739619	0.73832	0.848035	0.753636	0.732329	0.805255	0.848018	1.0439
YBR020W	GAL1	0.703363	0.655048	0.739619	0.73832	0.848035	0.753636	0.732329	0.580986	0.772405	0.889681
YBR021W	FUR4	0.631607	0.5892	0.607556	0.603547	0.708446	0.66656	0.686769	0.812881	0.93932	1.15726
YBR023C	CHS3	1.12875	1.1208	1.00169	1.00295	1.01378	1.08191	1.01622	0.864985	0.933156	0.978951
YBR024W	SCO2	1.07392	1.00509	0.98482	1.00541	1.17446	1.14881	1.0565	0.761428	0.897666	1.03768
YBR025C	YBR025C	0.753953	0.759806	0.640472	0.697405	0.863869	0.7692	0.78669	0.699064	0.794656	0.929155
YBR028C	YBR028C	0.508132	0.500563	0.574171	0.622153	0.721836	0.632606	0.679051	0.877125	0.998324	1.21426
YBR029C	CDS1	0.926007	1.03839	0.946294	0.862312	1.032	1.03189	1.07062	0.591255	0.779387	0.749568
YBR030W	YBR030W	0.926007	1.03839	0.946294	0.862312	1.032	1.03189	1.07062	0.591255	0.779387	0.749568
YBR031W	RPL4A	0.743348	0.826252	0.763753	0.706631	0.829302	0.710407	0.76234	0.497332	0.837387	0.761334
YBR033W	EDS1	0.934147	0.889487	0.867058	0.904154	0.926619	0.890205	0.969364	0.929417	0.978107	1.11216
YBR034C	HMT1	0.784798	0.736104	0.769324	0.789893	0.881151	0.796716	0.839079	0.779928	0.9061	0.777734
YBR036C	CSG2	1.00626	0.910186	0.765696	0.755655	0.91739	0.914292	0.906924	0.80281	0.940123	0.829475
YBR037C	SCO1	0.716995	0.681042	0.633957	0.652664	0.810219	0.702474	0.800065	0.923247	0.974309	0.958537
YBR038W	CHS2	0.716995	0.681042	0.633957	0.652664	0.810219	0.702474	0.800065	0.80089	0.996907	0.811272
YBR039W	ATP3	0.918079	0.875102	0.759626	0.875751	1.0137	1.01001	0.976791	0.971065	1.04882	1.09402
YBR040W	FIG1	0.481746	0.521147	0.748566	0.745205	0.833173	0.805477	0.649452	0.629306	0.804022	0.783261
YBR041W	FAT1	0.66202	0.635768	0.754164	0.773355	0.827803	0.768944	0.77872	1.20596	1.20603	1.2431
YBR042C	YBR042C	0.840982	0.842362	0.835922	0.838719	0.897189	0.819824	0.870021	0.860957	0.97693	1.0277
YBR043C	QDR3	0.83285	0.67146	0.726858	0.771167	0.714657	0.767879	0.713593	0.806447	0.931724	0.843706
YBR048W	RPS11B	0.527143	0.468708	0.527137	0.596928	0.705983	0.59769	0.6803	0.750323	0.715017	0.905032
YBR049C	REB1	0.795607	0.795817	0.685398	0.691408	0.790982	0.734525	0.773367	0.783054	0.910708	0.927323
YBR050C	REG2	1.05687	1.02482	0.862827	0.933009	0.96234	0.989736	1.01385	0.861718	0.90036	1.07929
YBR052C	RFS1	0.959888	0.889081	0.825272	0.825406	1.04556	0.93354	0.99121	0.798983	0.84789	1.15247
YBR054W	YRO2	0.47844	0.374356	0.402084	0.796275	0.758314	0.727904	0.632136	0.903026	1.12866	1.31805
YBR055C	PRP6	0.450375	0.393624	0.449717	0.553391	0.619762	0.641706	0.607592	0.766321	0.914679	0.931943
YBR057C	MUM2	0.60557	0.562453	0.541861	0.633312	0.651847	0.657557	0.603452	1.0976	1.24418	0.995821
YBR058C	UBP14	0.926059	0.860446	0.9591	1.10866	1.06898	1.01902	1.02779	0.88951	1.02745	0.912609
YBR058C-A	TSC3	0.923945	0.83123	0.75905	0.850066	0.913845	0.898956	0.930659	0.732734	0.823353	0.867656
YBR059C	AKL1	0.694423	0.600485	0.579459	0.574364	0.687835	0.698535	0.741906	0.856317	1.03411	1.09874
YBR060C	ORC2	0.820633	0.778043	0.873266	0.789297	0.828432	0.840625	0.855926	0.98039	1.07225	1.11207
YBR061C	TRM7	0.841383	0.859888	0.920364	0.972543	1.06672	0.953867	0.970213	0.462085	0.616277	0.558671
YBR062C	YBR062C	0.923107	0.971438	0.980265	0.958552	1.06002	1.0997	1.13223	0.322783	0.50611	0.45498
YBR063C	YBR063C	0.667323	0.729552	0.749715	0.794915	0.891798	0.80965	0.835084	0.533931	0.63087	0.630281
YBR065C	ECM2	0.70417	0.748948	0.665194	0.666372	0.856099	0.71529	0.780863	0.401158	0.603878	0.566013
YBR066C	NRG2	0.457055	0.329839	0.360129	0.466148	0.609873	0.527516	0.644989	0.624681	0.845665	0.856569
YBR068C	BAP2	0.300106	0.312082	0.324396	0.284895	0.324252	0.387603	0.365118	0.447495	0.531775	0.615963
YBR069C	TAT1	0.512597	0.635974	0.648377	0.629453	0.764365	0.663072	0.709531	0.522016	0.574403	0.672141
YBR070C	ALG14	0.784341	0.787636	0.641014	0.751134	0.861677	0.932255	0.966188	0.851633	0.940539	1.08616
YBR071W	YBR071W	0.785203	0.788808	0.641477	0.752136	0.863761	0.932926	0.967676	0.743615	0.818742	0.846575
YBR073W	RDH54	0.724384	0.709687	0.722266	0.703309	0.871671	0.826296	0.810455	0.816642	0.872618	0.897516
YBR076W	ECM8	0.943594	0.927322	0.897843	0.838751	0.95574	0.897621	0.994181	0.62317	1.03686	0.935625
YBR077C	SLM4	0.45045	0.449606	0.410744	0.433424	0.499398	0.484278	0.481512	0.765513	0.86551	0.968536
YBR078W	ECM33	0.44908	0.452113	0.41507	0.440938	0.505978	0.49286	0.489632	0.858492	0.836188	0.891442
YBR079C	RPG1	0.768693	0.735183	0.747899	0.790387	0.922482	0.80123	0.754131	0.904755	1.26707	1.10143
YBR080C	SEC18	0.85359	0.712076	0.73318	0.816608	0.857239	0.823546	0.818024	0.897884	0.962426	1.23203
YBR081C	SPT7	0.831153	0.720882	0.928843	1.04667	1.09167	0.980555	1.04546	1.01424	1.02029	1.1907
YBR082C	UBC4	0.641152	0.579071	0.521892	0.595051	0.782971	0.604262	0.729137	1.26491	1.20529	1.10768
YBR083W	TEC1	0.418155	0.324164	0.565787	0.760372	0.842653	0.845383	1.0602	0.924086	1.20093	1.26723
YBR084C-A	RPL19A	0.42645	0.425843	0.432909	0.473	0.543479	0.533376	0.54219	0.63268	0.83677	1.02195
YBR084W	MIS1	0.920237	0.891571	0.815751	0.851746	0.780049	0.861214	0.848881	0.86715	1.01811	1.13056
YBR086C	IST2	0.5993	0.609717	0.58338	0.743495	0.868742	0.755936	0.773191	0.539303	0.61719	0.617502
YBR087W	RFC5	1.03854	0.996533	0.936112	1.03591	1.0674	1.01858	1.15904	0.887542	0.988232	1.05372
YBR088C	POL30	0.721116	0.794178	0.840577	0.863547	1.0407	0.916627	0.868483	0.612252	0.672315	0.72287
YBR089C-A	NHP6B	0.871216	0.766295	0.63517	0.647377	0.766192	0.742902	0.815479	0.825603	0.925498	0.861493
YBR090C	YBR090C	0.815897	0.822303	0.909464	0.812863	0.967218	0.86429	0.926544	0.606897	0.760933	0.84835
YBR091C	MRS5	0.815897	0.822303	0.909464	0.812863	0.967218	0.86429	0.926544	0.692592	0.939906	1.00601
YBR092C	PHO3	0.649527	0.682954	0.755258	0.875094	0.870953	0.927501	0.828738	0.559267	0.678319	0.615562
YBR093C	PHO5	1.19905	1.1596	1.0156	1.10466	1.1475	1.13583	1.13069	0.866288	1.08506	1.04273
YBR094W	YBR094W	0.859042	0.852122	0.846885	0.994648	0.95289	0.989806	0.979438	0.644159	0.790206	0.757307
YBR095C	RXT2	0.996527	0.904929	0.84699	1.07523	1.14642	1.04456	1.01435	0.801267	1.00577	1.18115
YBR096W	YBR096W	0.996527	0.904929	0.84699	1.07523	1.14642	1.04456	1.01435	1.10515	1.16776	1.11392
YBR097W	VPS15	0.88028	0.872901	0.956125	0.921286	1.0804	1.02038	1.03952	0.8488	0.969796	0.8919
YBR098W	MMS4	0.900908	0.839733	0.912321	0.955912	1.05689	0.963014	0.974117	0.804874	0.875094	0.959168
YBR101C	FES1	0.818029	0.784534	0.613491	0.745147	0.816135	0.758309	0.782347	0.732562	0.884799	0.842101
YBR102C	EXO84	0.969824	0.953984	1.02092	1.0745	1.29093	1.17427	1.1732	0.9843	0.993606	1.04588
YBR103W	SIF2	0.969824	0.953984	1.02092	1.0745	1.29093	1.17427	1.1732	0.9843	0.993606	1.04588
YBR106W	PHO88	0.509353	0.502762	0.462847	0.483983	0.508295	0.464918	0.521454	0.883207	1.02022	1.06613
YBR107C	IML3	1.03312	0.981526	0.914101	0.944182	1.07273	1.06258	1.02613	0.830895	0.824524	0.812496
YBR108W	YBR108W	1.03312	0.981526	0.914101	0.944182	1.07273	1.06258	1.02613	0.901712	0.902574	1.14371
YBR109C	CMD1	0.832179	0.750404	0.723326	0.745499	0.902774	0.804915	0.877161	0.949176	1.12576	1.01956
YBR110W	ALG1	0.832179	0.750404	0.723326	0.745499	0.902774	0.804915	0.877161	0.800532	0.975751	1.09422
YBR111C	YSA1	1.10608	0.852784	0.8843	0.906461	1.23192	1.05972	1.06719	0.986004	1.01289	1.08664
YBR111W-A	SUS1	1.10608	0.852784	0.8843	0.906461	1.23192	1.05972	1.06719	0.917661	0.986487	0.76455
YBR112C	CYC8	0.438398	0.410653	0.427526	0.559905	0.554639	0.610379	0.477668	0.982337	1.13478	1.15751
YBR117C	TKL2	1.05285	0.87858	0.87261	0.943045	1.02539	0.898359	0.905826	0.918032	0.918241	1.07378
YBR118W	TEF2	0.254137	0.257516	0.356832	0.31401	0.456196	0.360732	0.428409	0.722123	0.801206	0.957945
YBR120C	CBP6	0.702217	0.737936	0.667831	0.689498	0.835481	0.792539	0.800794	0.501443	0.679467	0.478402
YBR121C	GRS1	0.916108	0.719679	0.801407	0.902578	0.851225	0.964719	0.928748	0.648689	1.00365	1.26233
YBR122C	MRPL36	0.893083	0.85477	0.882649	0.915897	0.956741	0.881395	0.881647	0.805683	0.999287	1.04156
YBR123C	TFC1	0.695783	0.640558	0.754286	0.714882	0.756345	0.788593	0.788419	0.712624	0.90556	0.961208
YBR125C	PTC4	0.715162	0.567577	0.653222	0.650602	0.763016	0.757555	0.792346	0.999502	1.11237	1.1312
YBR127C	VMA2	1.08695	0.953369	0.816353	0.799285	0.849865	0.897178	0.886083	0.86014	0.98454	1.03807
YBR128C	ATG14	0.752033	0.706392	0.785278	0.864693	0.939785	0.865113	0.923054	0.819342	1.18153	1.05184
YBR129C	OPY1	1.0938	0.982599	0.840095	0.994849	1.05254	1.03696	0.945652	0.919539	0.958065	1.07472
YBR130C	SHE3	1.15066	1.05537	0.917222	0.909001	0.991711	0.954044	0.948486	1.21608	1.09876	1.10711
YBR131W	CCZ1	1.15066	1.05537	0.917222	0.909001	0.991711	0.954044	0.948486	1.21608	1.09876	1.10711
YBR133C	HSL7	0.73744	0.782066	0.606696	0.606806	0.718284	0.64744	0.677082	0.591753	0.679006	0.7653
YBR135W	CKS1	0.73744	0.782066	0.606696	0.606806	0.718284	0.64744	0.677082	0.769435	0.850323	0.848768
YBR136W	MEC1	0.746981	0.765178	0.785526	0.852744	0.903321	0.813547	0.764478	0.376665	0.577972	0.666592
YBR137W	YBR137W	0.886598	0.773226	0.788947	0.777579	0.862592	0.802849	0.901021	0.798666	0.990709	0.831373
YBR138C	YBR138C	0.837596	0.815129	0.761241	0.873558	0.908362	0.891834	0.820636	0.644663	0.807635	0.826627
YBR139W	YBR139W	0.837596	0.815129	0.761241	0.873558	0.908362	0.891834	0.820636	0.749341	0.939691	0.958552
YBR140C	IRA1	0.896961	0.866848	0.807733	0.800355	0.92615	0.86507	0.83822	0.793333	0.852344	0.891879
YBR141C	YBR141C	0.877525	0.886971	0.891291	0.895708	1.01888	1.03046	1.02192	0.741979	0.810989	0.782713
YBR142W	MAK5	0.877525	0.886971	0.891291	0.895708	1.01888	1.03046	1.02192	0.729516	0.911269	0.986606
YBR143C	SUP45	0.657086	0.684172	0.747056	0.710155	0.89197	0.857999	0.841077	0.549979	0.692006	0.607704
YBR150C	TBS1	0.584321	0.538611	0.502924	0.546953	0.660073	0.624031	0.639661	0.869737	0.982056	0.998683
YBR151W	APD1	0.584321	0.538611	0.502924	0.546953	0.660073	0.624031	0.639661	0.869737	0.982056	0.998683
YBR152W	SPP381	0.758346	0.765721	0.868436	0.969614	1.00072	1.01069	1.06984	0.786549	0.831424	0.903947
YBR153W	RIB7	0.866505	0.804646	0.763982	0.823882	0.8433	0.869818	0.834243	0.819196	0.892394	1.15714
YBR154C	RPB5	0.678761	0.735013	0.786749	0.826208	1.02283	0.888499	1.00548	0.551704	0.673202	0.721936
YBR155W	CNS1	0.909339	0.965865	0.949516	0.97508	1.1149	1.0022	1.1153	0.471177	0.603191	0.635023
YBR156C	SLI15	0.553256	0.61147	0.669443	0.78081	0.852013	0.810958	0.864125	0.606495	0.905351	0.859643
YBR158W	AMN1	0.336847	0.338915	0.425773	0.60419	0.600114	0.612524	0.69119	0.665435	0.859207	0.852178
YBR159W	IFA38	0.61805	0.69879	0.693425	0.788132	0.788174	0.813507	0.765825	0.508946	0.610706	0.597034
YBR160W	CDC28	0.448048	0.442208	0.518325	0.609587	0.699801	0.578188	0.655387	0.707372	0.790339	0.804972
YBR161W	CSH1	0.393073	0.379616	0.427457	0.494661	0.564652	0.545472	0.610619	0.886512	1.10026	1.14484
YBR162C	TOS1	0.329279	0.264518	0.359416	0.486807	0.48765	0.507999	0.544698	1.02788	1.12566	1.23909
YBR162W-A	YSY6	0.457038	0.427534	0.353235	0.403432	0.46415	0.473104	0.510666	0.805119	0.930282	1.03992
YBR163W	DEM1	0.867849	0.769494	0.76765	0.740663	0.886779	0.791902	0.878056	1.13607	1.15413	1.0522
YBR164C	ARL1	0.671034	0.612038	0.690545	0.786215	0.875995	0.774344	0.80761	1.25829	1.27356	1.51388
YBR170C	NPL4	0.825073	0.776822	0.778232	0.779152	0.833969	0.823993	0.851515	1.04841	1.05549	1.02188
YBR171W	SEC66	0.825073	0.776822	0.778232	0.779152	0.833969	0.823993	0.851515	1.21943	1.26286	1.23002
YBR172C	SMY2	0.810469	0.792849	0.761259	0.787724	0.836408	0.828953	0.817441	0.774089	0.845194	0.83138
YBR173C	UMP1	1.16701	1.07214	0.948928	0.965934	1.03857	1.01738	1.1227	0.751366	0.935775	1.10502
YBR175W	SWD3	1.16701	1.07214	0.948928	0.965934	1.03857	1.01738	1.1227	0.717735	0.850424	0.72286
YBR176W	ECM31	0.714218	0.687614	0.720618	0.796291	0.97481	0.790202	0.902651	0.890554	0.859505	1.02487
YBR177C	EHT1	0.480831	0.512653	0.485236	0.593692	0.628975	0.571634	0.616195	0.466574	0.702727	0.50756
YBR179C	FZO1	0.965221	0.895324	0.770297	0.75333	0.885415	0.835123	0.905429	0.854017	0.911026	1.07215
YBR180W	DTR1	0.747432	0.733808	0.752179	0.846796	1.03145	0.838838	0.912745	0.887476	0.960414	0.974691
YBR181C	RPS6B	0.425869	0.41396	0.4293	0.430429	0.556263	0.480066	0.519983	0.625882	0.714405	0.789645
YBR182C	SMP1	1.09617	0.925121	0.837814	1.08334	0.967302	1.01345	0.997028	1.1228	1.08024	1.29738
YBR182C-A	YBR182C-A	0.412042	0.385454	0.397643	0.519582	0.630023	0.537723	0.512595	0.805119	0.930282	1.03992
YBR184W	YBR184W	0.676703	0.626234	0.766177	0.77627	0.91097	0.844154	0.945687	0.847391	1.02167	0.856249
YBR185C	MBA1	0.991654	0.90814	0.92958	0.941989	1.05668	0.945532	1.00462	0.649271	0.670587	0.837294
YBR186W	PCH2	0.99835	0.938641	1.07933	1.11349	1.31798	1.11142	1.14284	0.891276	0.903213	1.09802
YBR187W	GDT1	0.789167	0.673084	0.692049	0.783645	0.883697	0.821508	0.833708	1.20468	1.20633	1.13458
YBR188C	NTC20	0.771488	0.797483	0.68405	0.706248	0.86621	0.787068	0.825292	0.265981	0.430797	0.470335
YBR189W	RPS9B	0.771488	0.797483	0.68405	0.706248	0.86621	0.787068	0.825292	0.542813	0.702409	0.629593
YBR191W	RPL21A	0.567514	0.472239	0.525204	0.504267	0.65258	0.598396	0.64995	1.20761	1.08913	0.938429
YBR192W	RIM2	0.544226	0.534105	0.596525	0.744235	0.791493	0.662296	0.675674	0.905788	0.919182	0.9035
YBR193C	MED8	1.04772	0.961868	0.903742	1.06042	1.00186	1.08257	1.03025	0.876034	0.91467	0.986508
YBR194W	SOY1	1.04772	0.961868	0.903742	1.06042	1.00186	1.08257	1.03025	1.06014	1.0666	1.09971
YBR195C	MSI1	0.711675	0.636016	0.777885	0.724348	0.865028	0.842475	0.752231	0.825578	1.00578	1.30292
YBR196C	PGI1	0.528465	0.474455	0.497697	0.647517	0.617128	0.691247	0.660946	0.784247	0.785735	0.950603
YBR197C	YBR197C	0.835832	0.89189	0.686807	0.674989	0.979045	0.865226	0.870483	0.567901	0.758419	0.779815
YBR198C	TAF5	0.907801	0.955179	0.782687	0.792882	0.88555	0.918095	0.84665	0.514298	0.463717	0.655784
YBR199W	KTR4	0.907801	0.955179	0.782687	0.792882	0.88555	0.918095	0.84665	0.457721	0.775965	0.845248
YBR200W	BEM1	0.900409	0.777695	0.822008	0.902983	0.918055	0.876108	0.928554	1.12487	1.23708	1.23132
YBR201C-A	YBR201C-A	0.635956	0.411562	0.469029	0.562114	0.58025	0.490742	0.67337	0.831775	0.889274	1.01925
YBR201W	DER1	0.899574	0.88455	0.937853	0.948229	1.0848	0.921528	1.02025	0.780494	0.882867	0.904249
YBR202W	CDC47	0.821225	0.577341	0.555298	0.639268	0.762924	0.582852	0.782262	0.77888	0.962019	1.07294
YBR203W	COS111	0.296633	0.263195	0.3142	0.410169	0.412948	0.400765	0.356333	0.903917	1.00102	1.22668
YBR204C	YBR204C	1.20949	1.17775	0.999076	1.02428	1.04002	1.16465	1.12788	0.865952	0.946274	0.865083
YBR205W	KTR3	1.20949	1.17775	0.999076	1.02428	1.04002	1.16465	1.12788	0.799332	0.798896	0.851387
YBR207W	FTH1	0.931674	0.904784	0.847792	0.890232	1.00998	0.898089	1.04272	0.620135	0.823368	0.786474
YBR208C	DUR1,2	0.993261	0.795944	0.600063	0.709653	0.919508	0.772492	0.863527	0.875327	0.805508	0.801969
YBR211C	AME1	0.959007	0.935702	0.83895	0.861451	0.997981	0.981056	0.894313	0.836389	0.908532	1.00249
YBR212W	NGR1	0.959007	0.935702	0.83895	0.861451	0.997981	0.981056	0.894313	0.650283	0.774814	0.700379
YBR215W	HPC2	0.756212	0.723176	0.813919	0.796527	0.916379	0.831666	0.859598	1.02472	1.0353	1.02568
YBR216C	YBP1	1.01044	0.995511	1.03873	1.14711	1.16093	1.10656	1.1515	0.566588	0.727731	0.868549
YBR217W	ATG12	1.01044	0.995511	1.03873	1.14711	1.16093	1.10656	1.1515	0.791004	0.880058	1.02307
YBR220C	YBR220C	0.707414	0.718505	0.693786	0.791147	0.841859	0.807701	0.752496	0.90221	0.946411	0.87757
YBR221C	PDB1	0.838924	0.727735	0.710285	0.718597	0.817251	0.708149	0.770953	0.899176	1.03134	0.947412
YBR223C	TDP1	1.15864	1.13003	1.01515	1.04141	1.14539	1.12817	1.12034	0.778555	0.990247	0.94381
YBR225W	YBR225W	1.15864	1.13003	1.01515	1.04141	1.14539	1.12817	1.12034	0.74254	0.96471	0.887297
YBR227C	MCX1	1.02149	0.921103	0.965949	1.08822	1.10688	1.02641	1.15456	1.04998	1.03451	1.06255
YBR228W	SLX1	1.02149	0.921103	0.965949	1.08822	1.10688	1.02641	1.15456	1.05635	1.08327	1.07995
YBR229C	ROT2	0.731059	0.685719	0.725016	0.770406	0.747742	0.748774	0.789713	0.645837	0.866617	0.964875
YBR230W-A	YBR230W-A	0.821003	0.792784	0.614618	0.569587	0.695332	0.75613	0.795336	0.833002	0.963118	0.966805
YBR231C	SWC5	0.941188	1.00324	0.816092	0.933637	0.930833	1.00748	0.986261	0.39616	0.46668	0.636901
YBR233W	PBP2	0.941188	1.00324	0.816092	0.933637	0.930833	1.00748	0.986261	0.459587	0.582955	0.596966
YBR233W-A	DAD3	0.674366	0.657019	0.707097	0.793184	0.771165	0.823133	0.793105	0.824927	1.08591	1.28725
YBR234C	ARC40	1.03577	1.01207	0.883408	0.926511	0.910412	0.953023	0.922665	0.702963	0.688136	0.880669
YBR235W	YBR235W	1.03577	1.01207	0.883408	0.926511	0.910412	0.953023	0.922665	0.855704	0.837025	0.791278
YBR236C	ABD1	0.81573	0.860877	0.844043	0.78546	1.00936	0.935152	1.01493	0.646201	0.688116	0.736065
YBR237W	PRP5	0.81573	0.860877	0.844043	0.78546	1.00936	0.935152	1.01493	0.654852	0.661446	0.818219
YBR238C	YBR238C	0.55634	0.615258	0.536538	0.652796	0.622899	0.688821	0.608899	0.47459	0.507415	0.60049
YBR239C	YBR239C	0.530687	0.453536	0.599433	0.766114	0.830025	0.756679	0.832604	1.07432	1.19072	1.36853
YBR240C	THI2	0.893622	0.814178	0.65477	0.690594	0.757412	0.788597	0.736253	0.944474	1.07098	0.876165
YBR241C	YBR241C	0.690505	0.542551	0.567702	0.598163	0.69585	0.585458	0.674323	1.34037	1.3157	1.34429
YBR242W	YBR242W	0.690505	0.542551	0.567702	0.598163	0.69585	0.585458	0.674323	1.02548	1.03025	0.905388
YBR243C	ALG7	1.03521	0.880256	0.882758	0.934499	1.01501	0.946266	0.948559	0.959531	0.945835	0.951137
YBR244W	GPX2	1.12266	1.07881	1.03965	1.2239	1.10895	1.23023	1.1819	0.874326	1.02372	0.9468
YBR245C	ISW1	0.896589	0.788246	0.837148	1.01136	0.942413	1.04774	0.963018	1.26901	1.32804	1.21566
YBR246W	YBR246W	0.896589	0.788246	0.837148	1.01136	0.942413	1.04774	0.963018	0.966591	1.0263	1.18371
YBR247C	ENP1	0.705482	0.608614	0.748479	0.776304	0.914864	0.79006	0.841196	0.793212	0.865864	0.948017
YBR251W	MRPS5	0.881806	0.807897	0.788739	0.768513	0.841112	0.891277	0.861583	0.848257	0.885361	0.901979
YBR252W	DUT1	0.783483	0.840551	0.747113	0.885489	0.885306	0.771221	0.862052	0.695383	0.90655	0.911244
YBR253W	SRB6	0.996552	1.02465	0.950963	0.920994	0.997132	0.947132	0.885113	0.710378	0.761837	0.690698
YBR254C	TRS20	0.953878	0.840949	0.920425	0.940483	1.08003	1.04386	1.05494	0.850073	0.936542	1.06899
YBR255C-A	YBR255C-A	0.988454	0.737743	0.791166	0.823814	0.884027	0.842819	0.82226	0.657847	0.894623	1.02018
YBR257W	POP4	0.808384	0.708216	0.685086	0.752158	0.880641	0.82932	0.997168	0.858056	1.19844	1.35714
YBR258C	SHG1	0.767879	0.759921	0.888786	0.860065	1.05769	0.900751	0.978882	0.846834	1.05497	0.955093
YBR259W	YBR259W	0.767879	0.759921	0.888786	0.860065	1.05769	0.900751	0.978882	0.772741	0.815096	0.862756
YBR260C	RGD1	1.1414	1.03205	0.956134	1.00774	0.976061	0.981467	0.976529	0.914827	0.944993	1.08667
YBR261C	YBR261C	1.04508	1.06292	0.970324	0.868883	0.865837	0.9298	0.896111	1.01813	1.08667	1.01021
YBR262C	FMP51	1.09866	1.05503	0.984703	0.856413	1.03331	1.01663	1.13201	0.81024	1.02913	1.29171
YBR263W	SHM1	1.09866	1.05503	0.984703	0.856413	1.03331	1.01663	1.13201	0.853975	0.930119	0.978662
YBR264C	YPT10	0.888797	0.801972	0.810022	0.802403	0.90436	0.897489	0.830031	0.625378	0.870048	0.776368
YBR265W	TSC10	0.888797	0.801972	0.810022	0.802403	0.90436	0.897489	0.830031	0.968803	1.23779	1.21447
YBR267W	REI1	0.857442	0.93102	0.814621	0.90286	0.962654	0.858803	0.890894	0.442763	0.57961	0.610234
YBR268W	MRPL37	1.02269	1.06894	0.849795	0.841549	1.00125	0.994886	0.979799	0.669502	0.770222	0.77663
YBR269C	FMP21	0.827983	0.827446	0.753547	0.73694	0.892962	0.840185	0.882885	0.572454	0.785239	0.932242
YBR270C	BIT2	0.997818	0.932974	0.947735	0.902073	0.878	1.02457	1.02384	0.994865	1.12272	1.06566
YBR271W	YBR271W	0.997818	0.932974	0.947735	0.902073	0.878	1.02457	1.02384	0.994865	1.12272	1.06566
YBR272C	HSM3	0.585424	0.608563	0.644728	0.689707	0.746525	0.720608	0.71253	0.565242	0.839299	0.938225
YBR273C	UBX7	1.10492	0.992398	0.918216	0.917373	0.935908	1.04175	1.00981	0.895991	1.02933	1.01683
YBR274W	CHK1	1.10492	0.992398	0.918216	0.917373	0.935908	1.04175	1.00981	0.91754	1.09542	0.992965
YBR275C	RIF1	0.794045	0.767737	0.803567	0.884227	0.939995	0.841861	0.930101	0.629287	0.695012	0.790302
YBR276C	PPS1	1.05837	0.892862	0.86183	0.953993	0.91707	1.0115	1.10533	0.968822	1.07428	1.04146
YBR278W	DPB3	1.05837	0.892862	0.86183	0.953993	0.91707	1.0115	1.10533	0.968336	1.11639	1.24551
YBR279W	PAF1	0.832181	0.745014	0.671373	0.663808	0.667198	0.714189	0.745484	0.882917	1.06145	1.30272
YBR281C	YBR281C	0.978755	0.96994	0.953773	0.945812	1.00319	1.1094	1.13406	0.813452	0.922267	0.978409
YBR282W	MRPL27	0.767798	0.764191	0.827952	0.887513	0.925736	0.904655	0.982517	0.663484	0.764554	0.794684
YBR283C	SSH1	0.777747	0.732976	0.608511	0.609238	0.772882	0.803551	0.71033	0.579799	0.663903	0.707897
YBR284W	YBR284W	0.777747	0.732976	0.608511	0.609238	0.772882	0.803551	0.71033	0.672134	0.745621	0.864707
YBR287W	ZSP1	0.805627	0.76715	0.752655	0.755191	0.879754	0.808144	0.884115	0.756033	0.881613	0.928323
YBR288C	APM3	1.08246	1.07446	0.960023	0.986574	0.954971	1.05325	1.06747	0.826678	0.895901	0.971991
YBR289W	SNF5	1.08246	1.07446	0.960023	0.986574	0.954971	1.05325	1.06747	0.872744	0.969236	1.03936
YBR290W	BSD2	0.785743	0.837305	0.79738	0.782896	0.972547	0.877709	0.838158	0.647881	0.686783	0.783209
YBR291C	CTP1	0.798434	0.750054	0.655289	0.83695	0.883688	0.820464	0.801691	0.971858	0.966451	0.931012
YBR293W	VBA2	0.992668	0.920368	0.866254	0.908217	0.952471	0.957099	0.933412	0.982306	1.04179	1.03189
YBR294W	SUL1	0.745007	0.633717	0.755862	0.749884	0.954129	0.69227	0.901271	0.947306	1.17841	1.03669
YBR295W	PCA1	0.868913	0.803998	0.831477	0.884478	1.07428	0.905673	0.916771	0.830947	0.862481	1.19468
YBR296C	PHO89	0.644665	0.58629	0.627919	0.723472	0.762154	0.652207	0.746112	0.930409	0.965198	1.14646
YBR298C	MAL31	0.673432	0.614643	0.610602	0.667914	0.634313	0.662529	0.67668	0.773413	0.923137	0.943954
YBR298C-A	YBR298C-A	0.462947	0.46628	0.51096	0.481186	0.46215	0.466691	0.472089	0.532744	0.749378	0.789061
YBR299W	MAL32	0.673432	0.614643	0.610602	0.667914	0.634313	0.662529	0.67668	0.929943	0.988563	1.03516
YCL001W	RER1	0.891037	0.895688	0.850505	0.943003	1.06087	0.920802	0.952612	0.737676	0.856136	0.801124
YCL001W-A	YCL001W-A	0.823527	0.913702	1.03871	1.18291	1.25277	1.03632	1.1928	0.521653	0.601006	0.626618
YCL002C	YCL002C	0.891037	0.895688	0.850505	0.943003	1.06087	0.920802	0.952612	0.693088	0.92188	0.814903
YCL004W	PGS1	0.918628	0.81244	0.887901	0.929435	0.93636	0.92146	0.928292	1.16224	1.19699	1.24747
YCL005W	LDB16	1.14207	1.18817	0.838035	0.886544	0.827179	0.831093	0.924967	0.512437	0.650795	0.657451
YCL005W-A	VMA9	1.15839	1.02557	0.852966	0.832048	0.975421	0.955034	0.942465	0.865143	0.872137	0.922324
YCL010C	SGF29	1.12313	0.845176	0.793336	0.763177	0.946912	0.770774	0.89588	1.20872	1.30179	1.2907
YCL011C	GBP2	1.03644	1.0023	0.989555	0.870466	1.0341	0.941146	1.07182	1.02181	0.94346	1.12528
YCL012C	YCL012C	0.604512	0.605062	0.639398	0.657448	0.713341	0.719784	0.718396	0.615286	0.764124	0.723319
YCL014W	BUD3	1.02408	1.02064	0.890284	1.00514	1.05252	1.01449	1.00533	0.936989	0.906531	0.80144
YCL016C	DCC1	1.1003	1.0255	1.00408	1.11718	1.14326	1.07383	1.09015	0.801329	0.834114	0.932249
YCL017C	NFS1	0.873993	0.804204	0.830221	0.813425	0.879312	0.790316	0.798537	0.627129	0.656176	0.792054
YCL021W-A	YCL021W-A	0.509987	0.503865	0.60475	0.819772	0.831819	0.79883	0.937897	0.812809	0.942983	0.995479
YCL024W	KCC4	0.941689	0.976828	1.01117	0.932346	1.15918	0.987706	1.09329	0.300126	0.517242	0.401361
YCL025C	AGP1	0.319598	0.324204	0.347123	0.561294	0.356097	0.595431	0.349094	0.586464	0.832428	0.734705
YCL026C-A	FRM2	1.06874	1.05294	1.16743	1.18654	1.26123	1.19579	1.21362	0.590108	0.829176	0.871448
YCL028W	RNQ1	1.52832	1.40108	1.15185	1.18626	1.18892	1.22299	1.17227	0.81539	0.903517	1.01331
YCL029C	BIK1	1.52832	1.40108	1.15185	1.18626	1.18892	1.22299	1.17227	0.919173	0.972329	0.907589
YCL031C	RRP7	1.02555	0.675136	0.613263	0.791899	0.675594	0.733553	0.664904	0.864564	1.10358	1.2166
YCL032W	STE50	1.43925	1.37242	1.24434	1.21972	1.08759	1.33964	1.26498	0.872379	0.887679	0.990611
YCL033C	YCL033C	1.43925	1.37242	1.24434	1.21972	1.08759	1.33964	1.26498	0.872379	0.887679	0.990611
YCL034W	LSB5	1.25656	1.02132	0.953116	1.00279	1.18611	1.18806	1.15876	0.771838	0.846736	0.93774
YCL035C	GRX1	1.0662	0.857478	0.865317	0.95163	1.17924	1.06132	1.10578	1.15026	1.09406	1.32385
YCL036W	GFD2	0.958116	0.95657	0.954982	0.933202	1.00439	0.965565	1.00543	0.665981	0.974518	0.891719
YCL037C	SRO9	0.958116	0.95657	0.954982	0.933202	1.00439	0.965565	1.00543	0.596204	0.829617	0.826931
YCL038C	ATG22	0.683375	0.689965	0.767083	0.921501	0.947049	0.911946	0.89319	0.786549	0.831424	0.903947
YCL039W	GID7	0.682991	0.642491	0.714258	0.691451	0.711651	0.775449	0.7297	0.822905	1.00347	1.16932
YCL040W	GLK1	0.575804	0.565976	0.445904	0.401305	0.518937	0.495896	0.53666	0.758161	0.850596	0.761542
YCL043C	PDI1	0.575804	0.565976	0.445904	0.401305	0.518937	0.495896	0.53666	0.870547	1.00347	0.991161
YCL044C	MGR1	0.986849	0.958075	0.914033	0.86498	0.982124	0.906414	0.924109	0.825749	0.901377	0.869817
YCL045C	YCL045C	1.01253	0.963225	0.855483	0.846765	0.945169	0.852529	0.932465	0.784431	0.811049	0.921376
YCL047C	YCL047C	0.921718	0.868084	0.841663	0.82003	1.00386	1.06937	1.00648	0.899418	0.942564	0.964672
YCL048W	SPS22	0.642644	0.559479	0.657461	0.730053	0.830529	0.75084	0.730431	1.08137	1.1667	1.11736
YCL048W-A	YCL048W-A	1.22348	1.06318	0.989647	0.981549	1.16076	1.04196	1.1847	0.85601	0.942251	0.910838
YCL049C	YCL049C	1.22348	1.06318	0.989647	0.981549	1.16076	1.04196	1.1847	0.924236	0.9075	0.898684
YCL050C	APA1	0.901768	0.853565	0.832169	0.83499	1.02507	0.878363	1.02585	0.677193	1.01533	0.983829
YCL051W	LRE1	1.20753	1.10912	1.08153	1.10201	1.12186	1.08559	1.07938	1.1762	1.23807	1.20031
YCL052C	PBN1	1.20753	1.10912	1.08153	1.10201	1.12186	1.08559	1.07938	0.836151	0.891732	1.025
YCL054W	SPB1	0.88574	0.862359	0.894823	0.904177	1.05221	0.925777	1.04458	1.02389	1.14851	1.23121
YCL055W	KAR4	0.799473	0.574887	0.756397	0.859453	1.14145	1.06772	1.02006	0.752464	0.747216	0.896354
YCL056C	YCL056C	1.06124	1.03469	1.03977	1.03774	1.23817	1.23359	1.28229	1.08308	1.13087	1.12795
YCL057C-A	YCL057C-A	1.20329	1.10617	0.928933	0.871857	0.968609	1.03595	0.954724	1.1133	1.1143	1.16465
YCL057W	PRD1	1.1641	1.13879	0.940776	0.977077	1.02755	1.08941	1.06091	0.839472	1.03695	0.903492
YCL058W-A	YCL058W-A	1.14177	1.09464	1.14293	1.25102	1.2689	1.2089	1.28172	0.943802	0.896574	0.875458
YCL059C	KRR1	1.14177	1.09464	1.14293	1.25102	1.2689	1.2089	1.28172	0.663038	0.718487	0.79459
YCL061C	MRC1	1.01775	1.00146	0.986607	1.10493	1.0124	1.14411	1.08428	1.03525	1.00354	1.039
YCL063W	VAC17	0.747476	0.576612	0.605607	0.681239	0.74739	0.816986	0.618756	1.02273	1.15762	1.06595
YCL069W	VBA3	0.250016	0.265712	0.325346	0.301637	0.286428	0.271535	0.318161	0.303103	0.395752	0.406069
YCR002C	CDC10	1.00616	0.879413	0.943077	0.95579	1.05542	0.964445	1.01846	1.12093	1.20079	1.20959
YCR003W	MRPL32	1.00616	0.879413	0.943077	0.95579	1.05542	0.964445	1.01846	0.810131	0.872891	1.02423
YCR004C	YCP4	0.676296	0.523262	0.483699	0.734274	0.849647	0.770114	0.755154	1.01861	1.11927	1.13166
YCR009C	RVS161	0.910261	0.781466	0.730024	0.902726	1.23877	0.954057	1.03401	0.984257	1.06513	1.13413
YCR010C	ADY2	0.85536	0.793639	0.727123	0.735185	0.817977	0.858192	0.766446	0.718656	0.911398	0.986867
YCR011C	ADP1	0.977203	0.880912	0.978623	0.988971	1.19538	1.123	1.16527	0.706123	0.814927	0.834504
YCR012W	PGK1	0.360426	0.292078	0.316003	0.412004	0.500186	0.485373	0.430928	1.10216	1.18836	1.07628
YCR015C	YCR015C	0.943311	0.98682	1.0987	1.07395	1.29294	1.1642	1.3002	0.661726	0.677983	0.828406
YCR016W	YCR016W	1.02528	0.973938	1.0658	1.11848	1.24884	1.15643	1.1437	0.898013	0.93042	0.86189
YCR017C	CWH43	0.968595	0.938532	0.830389	0.931302	0.988732	0.952848	1.03156	0.808613	0.830141	0.921926
YCR020C	PET18	0.888758	0.843766	0.841186	0.94805	0.920174	0.916987	0.93403	0.968958	1.04559	1.04771
YCR020C-A	MAK31	0.888758	0.843766	0.841186	0.94805	0.920174	0.916987	0.93403	0.862253	0.997826	1.05273
YCR020W-B	HTL1	0.888758	0.843766	0.841186	0.94805	0.920174	0.916987	0.93403	1.08226	1.10229	1.06927
YCR026C	NPP1	0.983825	0.92625	0.990608	1.01214	1.13407	1.07976	1.1545	0.927133	1.04165	1.06371
YCR027C	RHB1	0.63403	0.545603	0.641093	0.630233	0.763562	0.734302	0.716244	0.991273	0.952397	0.836699
YCR028C	FEN2	0.805045	0.681573	0.765033	0.875443	0.945374	0.956082	0.99554	1.12983	1.22828	1.20392
YCR028C-A	RIM1	0.89568	0.880708	0.799435	0.887614	0.891023	0.92407	0.916496	0.926304	1.09326	0.932467
YCR030C	SYP1	0.871578	0.803158	0.963939	0.95861	1.03959	0.988082	1.01212	0.759084	0.994706	1.13226
YCR031C	RPS14A	0.549083	0.484483	0.52315	0.594908	0.759742	0.680811	0.741	0.927594	0.883375	1.03703
YCR032W	BPH1	1.1101	1.08881	1.15434	1.0719	1.30523	1.27523	1.22924	0.80388	0.819578	0.74661
YCR033W	SNT1	0.827471	0.782632	0.794655	0.749323	0.843924	0.79557	0.845776	0.885333	1.01726	0.914683
YCR034W	FEN1	0.570561	0.602919	0.630858	0.583367	0.628215	0.636024	0.672489	0.508909	0.760766	0.665087
YCR035C	RRP43	0.829343	0.809817	0.898238	0.926031	1.01302	1.01476	0.973829	1.01308	1.04063	1.0084
YCR036W	RBK1	0.829343	0.809817	0.898238	0.926031	1.01302	1.01476	0.973829	1.01308	1.04063	1.0084
YCR037C	PHO87	0.78125	0.714449	0.778986	0.887662	0.907561	0.857467	0.858081	0.813381	0.846941	0.782198
YCR042C	TAF2	0.772332	0.728169	0.759985	0.752749	0.896603	0.819239	0.81423	0.731863	0.815436	0.898435
YCR043C	YCR043C	0.964166	0.90877	0.855768	0.899187	1.04324	0.911474	0.974295	0.866365	0.862481	1.00755
YCR044C	PER1	1.0852	0.996854	0.918132	1.02787	1.0302	1.1117	1.01494	0.660214	0.921168	0.795781
YCR045C	YCR045C	0.883997	0.812161	0.774546	0.748171	0.78838	0.855586	0.808737	0.871165	1.0875	1.16043
YCR046C	IMG1	1.06098	0.998587	0.907377	0.776735	1.01723	0.995135	1.0678	0.955039	0.937945	1.01785
YCR047C	BUD23	1.09336	1.03252	0.832594	0.713217	0.890918	0.964922	0.847385	0.740401	0.69642	0.792236
YCR048W	ARE1	1.09336	1.03252	0.832594	0.713217	0.890918	0.964922	0.847385	0.574623	0.768978	0.715521
YCR051W	YCR051W	0.853593	0.812	0.783648	0.708249	0.826864	0.781626	0.85786	1.00753	0.962868	0.974438
YCR052W	RSC6	0.912962	0.903798	0.821284	0.853203	0.920814	0.896253	0.791279	0.824755	0.837039	0.85663
YCR054C	CTR86	0.722008	0.68317	0.805064	0.835009	0.868533	0.937648	0.843803	1.02538	0.891262	0.870423
YCR057C	PWP2	1.27321	1.17917	0.896954	0.817754	0.958517	0.883288	0.894517	0.945039	0.880895	1.01521
YCR059C	YIH1	1.17106	1.10468	0.832863	0.791184	0.98695	0.907366	1.0184	0.690399	0.827202	0.73157
YCR060W	TAH1	1.17106	1.10468	0.832863	0.791184	0.98695	0.907366	1.0184	0.859325	0.982418	1.18907
YCR061W	YCR061W	0.857683	0.943228	0.824278	0.805088	0.952015	0.867505	0.898628	0.422239	0.621872	0.603243
YCR063W	BUD31	1.11332	1.02027	0.808255	0.807969	0.931552	1.02148	1.06067	0.680407	0.785591	0.747875
YCR065W	HCM1	0.363026	0.385976	0.412669	0.416416	0.449822	0.565999	0.471217	0.623673	0.762378	0.684362
YCR066W	RAD18	0.947828	0.816479	0.952467	1.01471	0.965093	1.06576	1.05371	0.408411	0.6305	0.547595
YCR067C	SED4	0.785197	0.639758	0.631738	0.68145	0.877842	0.770092	0.769926	0.98785	1.12085	1.2067
YCR068W	ATG15	0.747613	0.638046	0.646719	0.723067	0.903462	0.851264	0.760924	0.865156	0.808053	0.891353
YCR069W	CPR4	1.14475	0.981695	0.774895	0.769873	0.947001	0.910241	0.925016	0.80137	0.984224	1.05303
YCR071C	IMG2	0.996992	0.938658	0.862305	0.910036	0.96408	0.978532	1.0212	0.991795	1.07892	1.02732
YCR072C	RSA4	0.80785	0.740768	0.759837	0.779961	0.883792	0.783558	0.906276	0.947402	1.09822	1.07039
YCR073C	SSK22	0.93575	0.915326	0.757683	0.822044	0.769968	0.731751	0.735008	0.722487	0.757605	0.760521
YCR073W-A	SOL2	0.93575	0.915326	0.757683	0.822044	0.769968	0.731751	0.735008	0.818742	0.995973	0.929534
YCR075C	ERS1	1.29433	1.29526	1.03154	1.02254	1.15273	1.10508	1.13737	0.72034	0.818163	0.911439
YCR075W-A	YCR075W-A	1.29433	1.29526	1.03154	1.02254	1.15273	1.10508	1.13737	0.904155	0.769729	0.781215
YCR076C	YCR076C	0.866083	0.830601	0.880623	0.887375	0.985548	0.856354	0.894317	0.726386	0.727266	0.870752
YCR077C	PAT1	1.2216	1.2394	1.0303	0.950652	1.05071	1.15506	1.05483	0.602467	0.858058	0.948501
YCR079W	AUP1	1.2216	1.2394	1.0303	0.950652	1.05071	1.15506	1.05483	0.797157	0.90218	0.867473
YCR081W	SRB8	0.90877	0.868947	0.854331	0.889377	0.888051	0.884735	0.857821	0.739029	0.944038	0.761235
YCR082W	AHC2	1.06201	0.9603	0.891657	0.874989	1.00851	0.974233	0.892677	0.914827	0.944993	1.08667
YCR083W	TRX3	0.915332	0.892476	0.893689	1.05761	1.1383	1.08171	1.11164	1.08308	1.13087	1.12795
YCR084C	TUP1	0.653801	0.65913	0.611987	0.636291	0.704333	0.700976	0.727717	0.644688	0.707053	0.792046
YCR086W	CSM1	1.23481	1.22994	1.1447	1.28476	1.45735	1.35189	1.45126	0.843701	1.03906	1.11843
YCR087C-A	LUG1	1.0574	1.13626	1.10631	1.02475	1.13178	1.12345	1.18301	0.482561	0.57674	0.59776
YCR088W	ABP1	0.967883	1.01862	0.961132	0.91673	0.88294	0.938453	0.948097	0.502413	0.725006	0.740419
YCR090C	YCR090C	0.703565	0.707686	0.792225	0.806737	0.973933	0.874394	0.87572	0.757991	0.785857	0.99678
YCR091W	KIN82	1.03205	0.966909	1.03513	0.9423	0.946256	1.10275	0.961068	0.869047	1.06655	0.851979
YCR092C	MSH3	0.935816	0.973556	0.864162	0.84133	0.975294	0.963134	0.994174	0.512437	0.650795	0.657451
YCR093W	CDC39	0.935816	0.973556	0.864162	0.84133	0.975294	0.963134	0.994174	0.610975	0.89909	0.877275
YCR094W	CDC50	0.706214	0.725429	0.740577	0.838845	0.920579	0.862658	0.93426	0.408054	0.585308	0.567485
YCR095C	OCA4	0.817134	0.770873	0.791629	0.950101	1.01459	0.999916	0.96692	0.828937	1.00286	0.944589
YCR098C	GIT1	1.03174	1.07264	1.19052	1.34377	1.25012	1.27838	1.10984	0.680455	0.60949	0.511094
YCR101C	YCR101C	0.81161	0.825143	0.955893	1.06475	1.12482	1.06206	1.04213	0.800175	0.752335	0.714125
YCR102C	YCR102C	0.576892	0.644277	0.612557	0.663419	0.73585	0.713722	0.695001	0.00273459	0.00382029	0.00325536
YCR104W	PAU3	0.531934	0.509395	0.532781	0.567792	0.545967	0.560577	0.56805	0.759181	0.976254	0.907374
YCR105W	ADH7	0.688703	0.750183	0.876173	0.92382	0.837266	0.872516	0.93003	0.737968	0.833132	0.730017
YCR106W	RDS1	0.929888	0.889797	0.870156	0.920468	0.958792	0.935088	0.915352	0.771739	0.878207	0.920889
YDL001W	RMD1	0.869646	0.786936	0.791782	0.727763	0.947361	0.849167	0.950367	0.854193	1.0191	0.988897
YDL002C	NHP10	0.869646	0.786936	0.791782	0.727763	0.947361	0.849167	0.950367	0.82547	0.985514	0.958916
YDL003W	MCD1	0.562756	0.536133	0.718069	0.762802	0.930447	0.75976	0.782343	0.648451	0.767481	0.884062
YDL004W	ATP16	0.999481	0.956431	0.906765	0.798795	1.03452	0.787091	0.91492	0.688345	0.967043	0.954107
YDL005C	MED2	0.920843	0.785545	0.875048	0.919072	1.06388	0.948263	1.05968	1.0318	1.12018	1.35156
YDL006W	PTC1	0.828465	0.675187	0.784177	0.799567	0.908237	0.823404	0.916787	0.824818	0.885629	0.953661
YDL007C-A	YDL007C-A	1.03773	1.00661	1.26927	1.26714	1.24521	1.11705	1.11042	0.890637	1.06253	1.06172
YDL007W	RPT2	0.518237	0.508024	0.594533	0.617025	0.783962	0.61674	0.725641	0.790096	1.01099	0.960676
YDL008W	APC11	1.26948	1.19735	0.984343	1.00751	1.10153	1.01696	1.16116	0.842975	1.05371	1.04123
YDL010W	YDL010W	1.11171	0.963584	0.673212	0.840164	1.08336	0.95803	0.973502	0.925433	0.883003	0.95012
YDL012C	YDL012C	1.27815	1.17982	0.817326	0.994569	1.06924	0.938754	1.01926	0.795528	1.0132	1.14565
YDL013W	HEX3	0.805093	0.739292	0.857695	0.818291	1.0269	0.960003	0.943056	0.747438	0.806144	0.941531
YDL014W	NOP1	0.51762	0.535067	0.620689	0.569595	0.743466	0.585105	0.681315	0.542813	0.702409	0.629593
YDL015C	TSC13	0.51762	0.535067	0.620689	0.569595	0.743466	0.585105	0.681315	0.542451	0.718321	0.681341
YDL017W	CDC7	1.1637	0.991516	1.1355	1.09506	1.28772	1.28076	1.17276	1.13753	1.07411	1.25889
YDL018C	ERP3	1.12833	1.09509	1.01546	1.02217	1.04054	1.1056	1.04609	0.779361	0.993861	0.865452
YDL019C	OSH2	1.01502	0.802678	0.774644	0.87797	1.0154	0.971946	0.937936	1.20596	1.24752	1.1393
YDL020C	RPN4	0.736092	0.649701	0.594547	0.684188	0.73878	0.662965	0.812547	0.817496	0.91361	0.954599
YDL021W	GPM2	0.853909	0.602324	0.858267	0.786679	0.98758	0.938353	0.995457	0.335238	0.419365	0.521791
YDL027C	YDL027C	0.757646	0.675446	0.689945	0.746506	0.783865	0.758792	0.760604	0.964413	0.937939	0.967278
YDL028C	MPS1	0.642302	0.605186	0.705062	0.834684	0.781009	0.735132	0.740289	0.860895	0.91719	0.949533
YDL029W	ARP2	0.824546	0.842279	0.777321	0.814539	0.876482	0.854218	0.894548	0.888701	0.96897	0.86705
YDL030W	PRP9	0.972118	1.02439	1.05228	1.08469	1.12627	1.01935	1.00783	0.633678	0.891006	0.803853
YDL031W	DBP10	1.13617	1.12946	0.958486	1.09228	1.04189	1.1198	1.09791	0.679716	0.788154	0.795076
YDL033C	SLM3	1.13617	1.12946	0.958486	1.09228	1.04189	1.1198	1.09791	0.766626	0.730682	0.825489
YDL035C	GPR1	0.799038	0.66026	0.697185	0.646684	0.887585	0.638289	0.824466	0.479658	0.698592	0.542359
YDL036C	PUS9	0.861825	0.737262	0.795502	0.923281	1.12932	0.925385	1.003	0.980432	1.07849	1.15979
YDL037C	BSC1	0.789367	0.821157	0.767537	0.776439	0.835124	0.797897	0.841847	0.610975	0.89909	0.877275
YDL040C	NAT1	1.12683	0.993074	1.03429	1.06622	1.10357	1.1909	1.24658	0.688084	0.624564	0.67512
YDL042C	SIR2	0.780387	0.697654	0.78534	0.856085	0.862961	0.762204	0.943391	0.973511	0.989569	1.03625
YDL043C	PRP11	0.9713	0.927213	0.95452	0.972379	1.04127	0.98431	0.963691	0.909244	0.972726	0.87796
YDL044C	MTF2	0.966082	0.850028	0.951808	1.05902	1.11748	1.16333	1.18938	0.874763	1.05731	1.03624
YDL045C	FAD1	0.849316	0.703021	0.839925	0.955702	0.981586	0.915956	0.964697	1.18298	1.16858	1.22665
YDL045W-A	MRP10	0.792829	0.748994	0.810786	0.721638	1.03174	0.8617	0.972133	0.923757	1.12198	0.982347
YDL046W	NPC2	0.56876	0.528973	0.485673	0.504173	0.528601	0.514411	0.603677	0.937678	1.00071	1.13287
YDL049C	KNH1	0.589797	0.660409	0.655567	0.716822	0.889497	0.765096	0.957131	0.466075	0.595699	0.613356
YDL051W	LHP1	0.89972	0.908484	0.933449	0.896938	1.04634	0.968781	1.02062	0.600744	0.672455	0.747736
YDL052C	SLC1	0.89972	0.908484	0.933449	0.896938	1.04634	0.968781	1.02062	0.599801	0.822699	0.796605
YDL053C	PBP4	0.680839	0.661067	0.695059	0.726673	0.836459	0.678437	0.765555	0.94729	1.06396	1.08683
YDL055C	PSA1	0.383693	0.407786	0.487754	0.460451	0.44701	0.598981	0.555871	0.610916	0.835138	0.778313
YDL056W	MBP1	1.17314	1.15927	1.04449	1.12136	1.05073	1.06513	1.09838	0.888593	0.849461	0.985915
YDL057W	YDL057W	0.86669	0.874309	0.906639	1.00862	1.01145	1.01119	1.04037	0.458786	0.511317	0.611266
YDL058W	USO1	1.16902	1.2295	1.04901	1.11095	1.1365	1.18691	1.1124	0.505219	0.649553	0.702731
YDL059C	RAD59	1.5489	1.49207	1.31342	1.20341	1.30239	1.1587	1.3518	0.73414	0.821833	0.792038
YDL060W	TSR1	0.732429	0.68452	0.678167	0.711622	0.854296	0.804847	0.859549	0.900911	0.881139	0.998603
YDL061C	RPS29B	0.732429	0.68452	0.678167	0.711622	0.854296	0.804847	0.859549	0.982137	1.05434	1.1494
YDL064W	UBC9	1.06971	1.03637	0.971729	1.07643	1.10498	1.07563	1.09814	0.86715	1.01811	1.13056
YDL069C	CBS1	1.39819	1.12485	0.991554	0.872637	1.08581	0.982574	1.19248	0.5525	0.472295	0.491662
YDL070W	BDF2	0.859179	0.836424	0.547624	0.549841	0.575177	0.605047	0.616852	0.791056	0.899006	0.860739
YDL072C	YET3	0.867463	0.742434	0.63874	0.647378	0.779787	0.636446	0.774285	0.935388	0.990731	0.900305
YDL073W	YDL073W	1.01286	0.884604	0.887551	0.904928	0.942543	0.928701	0.969972	0.813395	0.892971	0.961672
YDL074C	BRE1	1.01286	0.884604	0.887551	0.904928	0.942543	0.928701	0.969972	0.906089	0.954586	0.951231
YDL075W	RPL31A	0.416331	0.370503	0.413634	0.474535	0.582857	0.508324	0.60753	1.00159	0.922422	0.992798
YDL076C	RXT3	0.416331	0.370503	0.413634	0.474535	0.582857	0.508324	0.60753	0.906435	0.980996	1.29017
YDL077C	VAM6	1.08785	0.888202	0.880936	1.01331	1.07769	1.03975	1.10161	0.514577	0.575118	0.773322
YDL078C	MDH3	1.33056	1.2284	0.947289	1.02349	1.17498	1.16334	1.19572	0.914724	1.03787	0.955889
YDL079C	MRK1	0.958293	0.927972	0.917248	0.868425	0.944795	0.942752	1.00081	0.678649	0.729622	0.854557
YDL080C	THI3	1.14905	1.04962	0.940425	0.974039	1.16787	1.05184	1.08087	1.11524	1.04659	1.06768
YDL081C	RPP1A	0.577152	0.566993	0.632901	0.652589	0.842303	0.735183	0.746272	0.761576	0.810706	0.892113
YDL082W	RPL13A	0.321728	0.31878	0.334874	0.323075	0.389417	0.388869	0.432162	0.866836	0.955407	0.909897
YDL083C	RPS16B	0.448242	0.460392	0.421447	0.473285	0.629822	0.591293	0.664088	0.551248	0.674713	0.607958
YDL084W	SUB2	0.861445	0.873487	0.753872	0.742907	0.899937	0.785223	0.866903	0.495457	0.40564	0.532133
YDL085C-A	YDL085C-A	0.920852	0.767474	0.769916	0.773044	0.943979	0.925839	1.03264	1.00031	0.942432	1.04331
YDL085W	NDE2	1.19478	1.02827	0.899517	0.777224	1.00866	0.992308	1.04	0.730421	0.943386	1.00302
YDL086W	YDL086W	1.22446	1.28762	1.06523	1.07957	1.24523	1.12812	1.21029	0.460682	0.521423	0.554916
YDL087C	LUC7	1.32671	1.39184	1.10444	0.986391	1.04442	1.18654	1.22567	0.525551	0.708891	0.835576
YDL088C	ASM4	0.943952	0.879367	0.744112	0.72677	0.755056	0.850139	0.788049	0.982909	1.14046	0.990762
YDL089W	YDL089W	1.20428	1.12883	1.05736	1.18664	1.22353	1.25008	1.31297	0.981048	1.07157	1.20778
YDL090C	RAM1	1.20428	1.12883	1.05736	1.18664	1.22353	1.25008	1.31297	0.73001	0.794966	0.69074
YDL091C	UBX3	1.00606	0.969656	0.916606	0.957937	1.11807	1.06189	1.1834	0.708673	0.845087	0.826933
YDL092W	SRP14	1.00501	0.937772	0.855882	0.970242	1.06266	0.951711	1.04832	0.828346	0.863796	0.935263
YDL093W	PMT5	0.767378	0.766028	0.817252	0.886682	0.872862	0.874516	0.830924	0.673178	0.75817	0.885515
YDL095W	PMT1	0.92443	1.01422	0.748263	0.743684	0.873097	0.828285	0.84671	0.404439	0.505223	0.521175
YDL097C	RPN6	0.92443	1.01422	0.748263	0.743684	0.873097	0.828285	0.84671	0.404439	0.505223	0.521175
YDL098C	SNU23	0.88374	0.866854	0.858974	1.0272	1.0434	0.906363	0.991889	1.02577	0.931614	1.05265
YDL099W	BUG1	1.09497	1.14076	1.03901	1.15483	1.26208	1.108	1.18406	0.870739	0.871452	1.02365
YDL100C	GET3	1.09497	1.14076	1.03901	1.15483	1.26208	1.108	1.18406	0.870739	0.871452	1.02365
YDL101C	DUN1	0.688091	0.781319	0.807597	0.925318	1.03518	0.891652	0.866768	0.675273	0.789688	0.827456
YDL102W	CDC2	1.21694	1.26504	1.1378	1.16136	1.28924	1.26042	1.11434	0.605904	0.798675	0.706749
YDL103C	QRI1	1.21694	1.26504	1.1378	1.16136	1.28924	1.26042	1.11434	0.525756	0.635083	0.620554
YDL104C	QRI7	0.732639	0.68694	0.767962	0.82789	0.954476	0.893778	0.885052	0.832657	1.01037	0.961995
YDL105W	NSE4	1.01079	0.967333	1.00357	1.05717	1.16055	1.0717	1.22361	0.391588	0.522364	0.405766
YDL106C	PHO2	1.13677	1.22514	1.05028	0.922508	1.15015	1.07018	1.13434	0.377049	0.472813	0.526612
YDL107W	MSS2	0.9365	0.906908	1.0031	1.0117	1.05963	0.970544	0.987985	0.988381	1.16659	1.17603
YDL108W	KIN28	1.01747	0.97718	0.980894	1.09132	1.11051	1.09492	1.17691	1.0282	1.02075	1.01393
YDL109C	YDL109C	1.01747	0.97718	0.980894	1.09132	1.11051	1.09492	1.17691	0.69332	0.901415	0.911214
YDL110C	TMA17	1.00357	0.898976	0.844925	0.737545	0.925473	0.915267	0.944166	0.897745	0.875901	0.970953
YDL111C	RRP42	0.756048	0.753419	0.635887	0.684009	0.765302	0.702619	0.758341	0.637836	0.795818	0.756452
YDL112W	TRM3	0.999017	1.03183	0.882286	0.923565	0.985433	0.965951	0.933531	0.695964	0.881913	0.857134
YDL113C	ATG20	0.999017	1.03183	0.882286	0.923565	0.985433	0.965951	0.933531	0.540333	0.716001	0.580292
YDL114W	YDL114W	1.12018	1.04896	1.17775	1.26471	1.28689	1.2334	1.24071	0.792109	0.997322	0.923826
YDL115C	IWR1	1.22608	1.18624	1.16544	1.15899	1.1038	1.19073	1.15497	0.718045	0.771967	0.783798
YDL116W	NUP84	0.750671	0.701372	0.747222	0.763065	0.86586	0.787078	0.7797	0.923681	0.888936	0.903409
YDL117W	CYK3	0.88027	0.823169	0.870736	0.877112	0.958678	0.799826	0.8803	0.798413	0.85413	0.89323
YDL119C	YDL119C	0.88027	0.823169	0.870736	0.877112	0.958678	0.799826	0.8803	0.714728	0.813432	0.824193
YDL120W	YFH1	1.07071	0.875537	0.847875	0.875932	1.0161	0.996508	0.946698	0.968762	1.28062	1.06591
YDL121C	YDL121C	1.07071	0.875537	0.847875	0.875932	1.0161	0.996508	0.946698	0.949301	1.05787	1.02364
YDL122W	UBP1	0.650003	0.59567	0.535897	0.648752	0.734789	0.701061	0.699493	1.02037	1.00922	1.21707
YDL123W	SNA4	0.889507	0.872748	0.751146	0.73774	0.856392	0.748257	0.818382	0.622161	0.775064	0.77512
YDL124W	YDL124W	0.589033	0.474241	0.454113	0.583191	0.797162	0.732426	0.738937	1.17896	1.18191	1.19705
YDL125C	HNT1	1.01736	0.775457	0.709475	0.686265	0.863019	0.812653	0.902218	0.974679	0.932483	0.941998
YDL126C	CDC48	0.918506	0.891572	0.768516	0.776722	0.820624	0.909052	0.971649	0.847056	1.1069	0.918123
YDL127W	PCL2	0.346484	0.256546	0.332229	0.483755	0.422012	0.580651	0.535649	0.57528	0.683432	0.675721
YDL128W	VCX1	0.705699	0.611739	0.653342	0.674604	0.77899	0.758455	0.790953	0.929278	1.00653	1.09837
YDL129W	YDL129W	0.741094	0.666035	0.663509	0.677421	0.798786	0.754009	0.802893	0.982163	1.12506	0.997573
YDL130W	RPP1B	0.559395	0.523053	0.565138	0.595918	0.653039	0.59118	0.63796	0.895394	1.00794	1.14074
YDL132W	CDC53	0.76487	0.72157	0.815543	0.806915	0.860877	0.795798	0.847008	0.931074	0.995142	0.873558
YDL133W	YDL133W	0.50568	0.452942	0.537372	0.518119	0.671496	0.651161	0.730858	0.901906	0.927564	0.935774
YDL134C	PPH21	0.569841	0.491217	0.554972	0.600188	0.769758	0.637812	0.634316	1.03125	1.18295	1.19894
YDL135C	RDI1	0.754297	0.752566	0.841336	0.783449	0.960844	0.880719	0.906718	0.734481	0.868074	0.725547
YDL136W	RPL35B	0.484005	0.467735	0.51834	0.574956	0.724954	0.62618	0.684828	0.845423	1.06124	0.957882
YDL137W	ARF2	0.665596	0.587011	0.559558	0.541893	0.675842	0.61903	0.690313	0.91942	0.962325	0.928682
YDL138W	RGT2	0.642397	0.496715	0.553051	0.612128	0.770922	0.631247	0.739252	1.18268	1.35	1.32176
YDL139C	SCM3	0.981965	0.963846	0.877202	0.905456	1.07436	1.01761	1.05875	0.824846	0.859772	0.86643
YDL140C	RPO21	0.821374	0.675627	0.610639	0.575367	0.70325	0.625278	0.629235	1.13547	1.28667	1.15726
YDL141W	BPL1	1.02382	0.924599	0.802616	0.90604	0.918017	0.911869	1.01104	0.750154	0.936072	0.982463
YDL142C	CRD1	1.02382	0.924599	0.802616	0.90604	0.918017	0.911869	1.01104	0.946394	1.11886	1.20294
YDL143W	CCT4	1.25513	1.21153	0.987159	0.912137	1.04439	1.04013	0.97142	0.839582	1.02689	1.10229
YDL144C	YDL144C	1.25513	1.21153	0.987159	0.912137	1.04439	1.04013	0.97142	0.987607	1.02184	1.23335
YDL145C	COP1	1.08639	1.02103	0.811432	0.883137	0.939816	0.866804	0.849968	0.870347	0.815216	0.903412
YDL147W	RPN5	0.772879	0.82986	0.767753	0.901767	0.909233	0.866248	0.921172	0.504046	0.783273	0.641095
YDL148C	NOP14	0.772879	0.82986	0.767753	0.901767	0.909233	0.866248	0.921172	0.504046	0.783273	0.641095
YDL149W	ATG9	0.933479	1.02437	0.946933	1.04757	0.96891	1.05586	1.03712	0.525519	0.525386	0.639686
YDL150W	RPC53	0.871686	0.937704	0.909746	0.987857	1.12274	1.1689	1.15382	0.467595	0.640737	0.722087
YDL153C	SAS10	0.871686	0.937704	0.909746	0.987857	1.12274	1.1689	1.15382	0.542215	0.596155	0.587655
YDL154W	MSH5	0.880079	0.997653	1.05007	1.0004	1.0796	0.96628	0.975159	0.641527	0.807616	0.908621
YDL155W	CLB3	0.768683	0.737437	0.725409	0.697199	0.817697	0.690937	0.731802	0.672809	0.725275	0.802118
YDL156W	YDL156W	0.963847	0.885203	0.859705	1.01212	1.06319	1.00061	1.09662	1.03708	1.11703	1.18716
YDL157C	YDL157C	0.963847	0.885203	0.859705	1.01212	1.06319	1.00061	1.09662	1.03708	1.11703	1.18716
YDL159W	STE7	0.846938	0.825521	0.758391	0.824682	0.963909	0.895613	0.924605	0.451399	0.53304	0.633578
YDL160C	DHH1	0.846938	0.825521	0.758391	0.824682	0.963909	0.895613	0.924605	0.783708	0.895524	0.957516
YDL160C-A	YDL160C-A	0.47023	0.513585	0.51146	0.560888	0.632775	0.591183	0.624296	0.369813	0.500937	0.458886
YDL161W	ENT1	1.08016	1.11367	0.976868	0.900437	0.956026	1.00398	0.960344	0.485267	0.735028	0.698478
YDL164C	CDC9	1.07037	1.111	1.00063	0.943714	0.929425	1.05773	0.971562	0.481043	0.684537	0.715427
YDL165W	CDC36	0.898243	0.878833	0.871782	0.887201	1.08849	0.932609	1.0183	0.74966	0.959838	0.901685
YDL166C	FAP7	0.898243	0.878833	0.871782	0.887201	1.08849	0.932609	1.0183	0.725096	0.842458	0.879116
YDL167C	NRP1	0.950442	0.957956	0.982462	0.889633	1.01206	0.923454	0.963181	0.845849	0.97249	1.0093
YDL168W	SFA1	0.811343	0.743264	0.789675	0.835887	0.887431	0.873713	0.867776	0.764749	0.880143	0.924657
YDL173W	YDL173W	1.29363	1.15635	0.672635	0.675415	0.785747	0.803332	0.881873	0.739104	0.755136	0.7795
YDL174C	DLD1	1.18567	1.04433	0.667073	0.62897	0.8153	0.797732	0.799503	0.754463	0.861307	0.934304
YDL175C	AIR2	0.901348	0.73222	0.672527	0.747025	0.908042	0.797718	0.851542	0.656636	0.918064	0.948742
YDL176W	YDL176W	0.985999	0.920348	0.878374	1.0483	1.08496	1.02461	1.06773	0.737071	0.772428	0.905388
YDL178W	DLD2	0.879415	0.764973	0.955559	0.9222	0.969418	1.13287	0.967933	0.944128	0.906249	0.953347
YDL179W	PCL9	0.784944	0.765457	0.736299	0.745318	0.866326	0.822049	0.817386	0.992184	1.09619	1.17744
YDL181W	INH1	0.95346	0.747704	0.598388	0.572719	0.532056	0.596208	0.591765	1.05777	1.21002	1.1595
YDL185W	TFP1	0.804798	0.760853	0.659146	0.706352	0.790465	0.74903	0.696278	0.857297	0.88906	0.986642
YDL186W	YDL186W	0.806283	0.781254	0.891337	0.967537	1.01808	0.9597	0.93562	0.762498	0.780452	0.937296
YDL188C	PPH22	0.867602	0.820098	0.784869	0.870726	1.01597	0.871484	0.916559	0.981849	1.02556	0.979273
YDL189W	RBS1	1.11813	1.03549	0.965197	0.948101	0.996298	0.999316	0.988339	0.862271	0.868158	1.01858
YDL190C	UFD2	1.11813	1.03549	0.965197	0.948101	0.996298	0.999316	0.988339	0.678464	0.900439	0.8473
YDL191W	RPL35A	0.574738	0.548087	0.551913	0.575385	0.655527	0.646414	0.634195	1.01662	1.12559	1.10723
YDL192W	ARF1	0.786865	0.712447	0.738851	0.698882	0.794671	0.757525	0.799338	0.814259	0.934978	0.918884
YDL193W	NUS1	0.654138	0.599679	0.643345	0.74226	0.823916	0.733981	0.831001	0.905383	1.03408	1.05444
YDL194W	SNF3	0.685929	0.707338	0.738703	0.872571	0.860243	0.87918	0.858191	0.710011	0.835686	0.838918
YDL195W	SEC31	1.0821	1.01703	0.836726	0.746278	0.8369	0.922494	0.940194	0.654439	0.678604	0.642917
YDL197C	ASF2	1.27464	1.23875	1.05602	1.00398	1.13839	1.10359	1.13173	0.954357	1.01363	1.06445
YDL200C	MGT1	0.930777	0.975251	0.855548	0.924077	1.01466	1.00847	0.978693	0.601047	0.65342	0.617407
YDL201W	TRM8	0.771011	0.720889	0.771652	0.785287	0.876451	0.884745	0.798805	0.83951	0.952121	1.02016
YDL202W	MRPL11	0.762493	0.718154	0.634767	0.627771	0.760161	0.730778	0.783517	1.07059	1.14583	1.07303
YDL203C	ACK1	0.762493	0.718154	0.634767	0.627771	0.760161	0.730778	0.783517	0.806922	0.906621	0.787471
YDL205C	HEM3	1.10286	0.945736	1.00121	0.925451	1.08408	0.981992	1.07696	1.01515	1.0042	1.0827
YDL206W	YDL206W	0.726295	0.653042	0.812785	0.773153	0.994213	0.842579	0.749634	0.894388	1.05919	1.01031
YDL207W	GLE1	0.705784	0.68877	0.804406	0.676016	0.726008	0.811051	0.775324	0.903689	0.856298	0.930381
YDL208W	NHP2	1.09469	1.08467	0.888078	0.867732	0.902273	1.00739	0.926529	0.866836	0.955407	0.909897
YDL209C	CWC2	1.09469	1.08467	0.888078	0.867732	0.902273	1.00739	0.926529	0.8938	0.874193	0.861348
YDL210W	UGA4	1.13702	1.13029	0.945074	0.967132	1.19993	1.1221	1.17144	0.70499	1.09021	1.14692
YDL211C	YDL211C	1.09898	1.08422	0.94495	1.09223	1.12311	1.0274	1.01738	0.722985	0.809989	1.03041
YDL212W	SHR3	0.922263	0.876881	0.780289	0.809476	0.968699	0.860057	0.91178	0.971174	0.963222	0.933848
YDL213C	NOP6	0.942617	0.964912	0.937412	0.929394	1.289	1.12913	1.16351	0.544565	0.69524	0.652828
YDL215C	GDH2	0.90549	0.804881	0.644179	0.674176	0.790145	0.762283	0.777233	0.829571	1.00256	0.951651
YDL216C	RRI1	0.927537	0.870952	0.847482	0.9436	0.964091	0.964269	0.962203	0.819087	0.992946	1.07636
YDL217C	TIM22	0.893916	0.818873	0.82347	0.890577	1.01372	0.907393	0.891147	0.913021	0.899519	1.12592
YDL218W	YDL218W	0.870008	0.871847	0.824194	0.866283	0.981613	0.980941	0.94922	0.706585	0.799022	0.860092
YDL219W	DTD1	0.93941	0.922287	0.915288	0.922016	0.848567	0.9444	0.957758	0.807323	0.948271	0.981652
YDL220C	CDC13	0.93941	0.922287	0.915288	0.922016	0.848567	0.9444	0.957758	0.523294	0.776544	0.901555
YDL224C	WHI4	0.35134	0.289781	0.311675	0.388973	0.452321	0.365797	0.430514	1.25369	1.28278	1.30303
YDL225W	SHS1	1.01166	0.983795	0.918852	0.873474	0.947661	0.983527	0.99386	0.708851	0.773557	0.90272
YDL226C	GCS1	1.01166	0.983795	0.918852	0.873474	0.947661	0.983527	0.99386	0.684637	0.755072	0.821653
YDL229W	SSB1	0.697019	0.704856	0.667981	0.617399	0.672405	0.723776	0.692979	0.941859	1.1193	1.12624
YDL230W	PTP1	0.878257	0.856013	0.711856	0.720902	0.768804	0.761742	0.82178	0.807887	0.864341	0.855543
YDL231C	BRE4	0.878257	0.856013	0.711856	0.720902	0.768804	0.761742	0.82178	0.807887	0.864341	0.855543
YDL233W	YDL233W	0.992977	1.00689	0.769963	0.887431	0.972931	0.996565	0.896207	0.656723	0.739419	0.70375
YDL235C	YPD1	0.776531	0.674919	0.709115	0.753789	0.84045	0.837072	0.855364	0.913676	0.959007	1.00264
YDL236W	PHO13	0.882968	0.873209	0.782135	0.919716	0.92432	0.930879	0.866916	0.715422	0.720486	0.73655
YDL237W	YDL237W	1.0797	0.985053	0.957166	1.0565	1.09746	1.08814	1.03566	0.710185	0.766243	0.677937
YDL238C	GUD1	1.0797	0.985053	0.957166	1.0565	1.09746	1.08814	1.03566	0.976538	0.98844	1.07358
YDL240W	LRG1	0.953667	0.933187	0.928771	0.886426	0.986111	0.953552	1.04793	0.799766	0.90367	0.943528
YDL241W	YDL241W	0.493072	0.484066	0.477286	0.591618	0.618733	0.575645	0.571448	0.619808	0.77483	0.846397
YDL243C	AAD4	1.21234	1.14115	0.962141	1.02033	1.07487	1.01616	1.05183	1.01645	1.09654	1.01043
YDL248W	COS7	0.504821	0.559126	0.4986	0.578564	0.541215	0.561427	0.51496	0.436818	0.47947	0.465287
YDR002W	YRB1	0.814565	0.609497	0.705434	0.739977	0.803509	0.778166	0.836172	0.659677	0.794685	0.901073
YDR003W	RCR2	0.753994	0.736111	0.678757	0.731265	0.925538	0.819409	0.889916	0.43087	0.833077	0.760827
YDR004W	RAD57	0.836129	0.725171	0.737322	0.810768	0.920107	0.823493	0.894449	1.00991	1.16373	1.09296
YDR005C	MAF1	0.771724	0.66222	0.711104	0.741635	0.932383	0.766652	0.77485	0.989748	1.24186	1.20256
YDR006C	SOK1	0.926211	0.801502	0.710927	0.745666	0.829027	0.818957	0.905555	1.01173	1.01687	0.805301
YDR007W	TRP1	0.926211	0.801502	0.710927	0.745666	0.829027	0.818957	0.905555	0.730318	0.864942	1.01146
YDR012W	RPL4B	0.739684	0.677141	0.64239	0.75399	0.758863	0.732674	0.802894	0.737182	0.991342	0.90763
YDR013W	PSF1	0.772233	0.73055	0.87105	0.833323	1.0403	0.822965	0.910261	0.928619	0.905867	1.04588
YDR014W	RAD61	1.18704	1.06274	1.10076	1.04786	1.21305	1.1678	1.21534	0.994304	1.04862	1.00619
YDR016C	DAD1	0.929792	0.8792	0.873365	0.862791	1.00757	0.836773	0.950522	0.831942	0.950649	0.847799
YDR017C	KCS1	0.574403	0.592518	0.688705	0.693557	0.822875	0.769152	0.836812	0.579677	0.598924	0.621849
YDR018C	YDR018C	0.879193	0.797092	0.900187	0.912904	0.934446	0.883973	0.963853	0.819867	0.935236	0.922054
YDR020C	YDR020C	0.872916	0.694642	0.857879	0.911039	1.04889	0.967792	0.910313	0.934597	0.898118	0.975776
YDR021W	FAL1	0.872916	0.694642	0.857879	0.911039	1.04889	0.967792	0.910313	0.987411	1.14025	1.04855
YDR022C	CIS1	0.836709	0.686435	0.692465	0.729413	0.953163	0.884007	0.912748	1.19385	1.25436	1.28412
YDR023W	SES1	0.699703	0.696062	0.714223	0.66081	0.860548	0.724548	0.841458	0.573965	0.981836	0.894015
YDR025W	RPS11A	0.426219	0.390837	0.48	0.505806	0.613237	0.567365	0.576162	0.947402	1.09822	1.07039
YDR026C	YDR026C	1.0617	0.8523	0.893631	0.89518	1.09878	1.03728	1.12614	1.19021	1.17461	1.20069
YDR027C	VPS54	0.947634	0.831578	0.794646	0.872134	0.944532	0.906159	0.923667	0.747968	0.948087	0.925002
YDR028C	REG1	0.855144	0.784428	0.831333	0.857578	1.10993	0.935078	1.01418	0.837567	0.937438	0.744835
YDR030C	RAD28	1.11308	1.06189	1.10333	1.12245	1.31374	1.28191	1.21025	0.7231	0.847995	0.945654
YDR031W	MIC14	1.11308	1.06189	1.10333	1.12245	1.31374	1.28191	1.21025	0.901493	0.932884	1.12818
YDR032C	PST2	0.924273	0.72761	0.755924	0.652024	0.87628	0.767383	0.845967	1.34037	1.3157	1.34429
YDR033W	MRH1	0.386586	0.358641	0.30197	0.854001	0.629293	0.849516	0.526773	0.761402	0.784981	0.829481
YDR034C-A	YDR034C-A	0.530229	0.435429	0.584093	0.557074	0.695892	0.614647	0.632033	1.40097	1.4165	1.42752
YDR040C	ENA1	0.936736	0.518173	0.370102	0.714522	0.483698	0.884142	0.508266	0.582425	0.963397	0.931706
YDR041W	RSM10	1.05258	0.808005	0.699432	0.822203	0.986583	0.838709	0.989809	0.898011	1.06169	1.07341
YDR042C	YDR042C	0.837404	0.780658	0.831273	0.876182	1.0571	0.925462	0.99885	0.760445	0.873712	0.981989
YDR044W	HEM13	1.2541	1.15734	1.08208	0.99814	1.21248	1.1245	1.14787	0.797488	0.940292	0.807122
YDR045C	RPC11	0.763308	0.629642	0.636706	0.697632	0.745095	0.741338	0.780208	1.01371	1.09184	1.27799
YDR047W	HEM12	1.01966	0.825957	0.686551	0.697711	0.925981	0.908454	0.864753	0.867208	1.04231	0.957577
YDR049W	YDR049W	0.782394	0.756079	0.7303	0.768378	0.932083	0.767148	0.887131	0.845423	1.06124	0.957882
YDR050C	TPI1	0.542698	0.499431	0.57002	0.602271	0.823429	0.62136	0.774088	0.754265	0.837599	0.87941
YDR051C	YDR051C	0.884338	0.768201	0.831454	0.856719	1.05028	0.892224	0.911505	1.0038	1.05248	1.17855
YDR052C	DBF4	0.582877	0.544987	0.619007	0.610075	0.776686	0.68207	0.607411	1.08215	1.02282	0.845989
YDR054C	CDC34	0.826537	0.759777	0.67065	0.688169	0.853063	0.751792	0.952411	0.786959	0.827687	0.910214
YDR055W	PST1	0.706026	0.579775	0.524329	0.559439	0.656029	0.614535	0.775851	1.0682	0.965615	1.03298
YDR056C	YDR056C	1.06412	1.00169	1.04054	1.03277	1.13903	1.03798	1.0521	0.806536	0.831537	0.959207
YDR057W	YOS9	1.06412	1.00169	1.04054	1.03277	1.13903	1.03798	1.0521	0.861278	0.923915	1.0076
YDR058C	TGL2	0.516336	0.444232	0.500108	0.558908	0.636016	0.529515	0.63141	1.0699	1.21445	1.1067
YDR059C	UBC5	1.09247	0.816455	0.926623	0.87804	1.11921	0.895036	1.10186	0.92474	1.1029	1.01313
YDR060W	MAK21	0.954164	0.9367	1.01731	1.10989	1.06281	1.01207	1.10336	0.733693	0.861447	0.851327
YDR061W	YDR061W	0.788933	0.673926	0.671018	0.718022	0.721356	0.753346	0.758591	0.889815	0.994947	1.16183
YDR062W	LCB2	0.747849	0.635825	0.656458	0.743758	0.755784	0.768173	0.775796	1.10118	1.24888	1.16874
YDR064W	RPS13	0.604071	0.55909	0.676772	0.65024	0.771453	0.663221	0.810293	0.861604	0.994419	0.878537
YDR065W	YDR065W	0.897861	0.77906	0.921551	0.896496	0.981506	1.00085	1.1357	1.12632	1.10744	1.06131
YDR066C	YDR066C	1.29143	1.26303	1.19927	1.19545	1.21	1.26279	1.12326	0.908802	0.996686	1.14083
YDR067C	OCA6	1.12855	1.01611	1.09028	1.14189	1.31208	1.19148	1.19292	0.775289	0.917743	0.952976
YDR068W	DOS2	1.12855	1.01611	1.09028	1.14189	1.31208	1.19148	1.19292	0.748978	0.970364	1.00677
YDR071C	PAA1	0.610341	0.522312	0.591087	0.630959	0.780689	0.650264	0.716507	0.710462	0.954464	0.938774
YDR072C	IPT1	0.329599	0.402358	0.362649	0.559405	0.481031	0.612991	0.536563	0.41557	0.447478	0.449421
YDR073W	SNF11	0.563581	0.556803	0.51352	0.692587	0.70342	0.721346	0.842801	0.788142	0.945608	0.889747
YDR075W	PPH3	0.681768	0.642421	0.711077	0.77956	0.866737	0.863065	0.820754	1.07632	1.22048	1.03291
YDR076W	RAD55	0.510763	0.470055	0.63693	0.722626	0.795631	0.670342	0.778633	0.776648	0.915902	0.940902
YDR079C-A	TFB5	1.10404	1.04325	1.11277	1.15431	1.2768	1.1874	1.21577	0.834272	0.933285	1.07712
YDR079W	PET100	0.865256	0.838583	0.894953	0.946412	1.24653	0.931098	1.11516	0.915165	0.968668	1.02719
YDR081C	PDC2	1.12599	1.13396	0.998396	1.08816	1.08109	1.09493	1.1165	0.602487	0.702998	0.764881
YDR082W	STN1	1.12599	1.13396	0.998396	1.08816	1.08109	1.09493	1.1165	0.763028	0.695537	0.764823
YDR083W	RRP8	0.705606	0.758562	0.76674	0.767203	0.912428	0.875518	0.93721	0.553697	0.985261	0.903088
YDR084C	TVP23	1.07892	0.885689	0.908995	1.07111	0.998292	1.10559	0.946491	0.912284	1.03029	1.0219
YDR086C	SSS1	0.823147	0.84431	0.801749	0.826367	1.01937	0.868503	0.930977	0.665138	0.703864	0.705285
YDR087C	RRP1	0.923088	0.927105	0.889107	0.976309	0.928197	0.937509	0.968544	0.608219	0.667228	0.71949
YDR088C	SLU7	0.643143	0.612344	0.595407	0.638408	0.723836	0.715366	0.630386	0.731048	0.78499	0.766587
YDR089W	YDR089W	0.502051	0.518479	0.619082	0.797747	0.870227	0.883127	0.826122	0.564716	0.665681	0.668126
YDR090C	YDR090C	0.806234	0.758962	0.853345	0.87143	0.899326	0.899354	0.89612	0.847452	0.946912	1.11305
YDR091C	RLI1	0.918756	0.844376	0.778439	0.708064	0.776868	0.804015	0.719283	1.05691	1.1345	1.1618
YDR092W	UBC13	0.919474	0.942514	0.94932	1.06405	1.21482	1.02688	1.04559	0.5886	0.704093	0.644391
YDR093W	DNF2	0.647828	0.610786	0.612005	0.652576	0.797539	0.736082	0.795726	0.865458	0.935566	1.08838
YDR096W	GIS1	0.963794	0.821663	0.90325	0.982764	0.938773	1.02747	1.00192	1.19963	1.46907	1.28892
YDR097C	MSH6	0.835343	0.783285	0.790967	0.905494	0.879219	0.829932	0.862734	0.645261	0.907193	0.981392
YDR098C	GRX3	0.63706	0.641025	0.622843	0.656018	0.820014	0.685811	0.736646	0.798791	1.05161	0.823879
YDR099W	BMH2	0.688185	0.642767	0.687854	0.641839	0.771558	0.745308	0.764485	1.0402	1.17019	1.15795
YDR100W	TVP15	0.845328	0.697869	0.641228	0.674923	0.879329	0.882165	0.889866	0.627568	0.873552	1.03534
YDR101C	ARX1	0.678012	0.697219	0.741423	0.809999	0.886908	0.766436	0.839834	0.632934	0.702191	0.650944
YDR103W	STE5	0.678012	0.697219	0.741423	0.809999	0.886908	0.766436	0.839834	0.62951	0.704478	0.790721
YDR104C	SPO71	0.913504	0.897679	0.865	0.867575	0.918455	0.869342	0.931046	0.933784	1.04326	1.06404
YDR105C	TMS1	0.993685	0.997738	0.928715	1.06876	1.01348	0.963605	1.06417	0.720286	0.738163	0.811254
YDR106W	ARP10	0.993685	0.997738	0.928715	1.06876	1.01348	0.963605	1.06417	0.720286	0.738163	0.811254
YDR107C	YDR107C	0.926043	1.04062	0.877404	0.914841	1.00438	0.943831	0.947117	0.449043	0.56419	0.542755
YDR108W	GSG1	0.926043	1.04062	0.877404	0.914841	1.00438	0.943831	0.947117	0.449043	0.56419	0.542755
YDR109C	YDR109C	0.989114	0.952246	0.942231	0.874109	0.987878	0.90946	1.10502	0.774514	0.927082	0.874315
YDR110W	FOB1	0.910987	0.852807	0.925932	0.925905	1.03498	1.03495	1.09504	0.732428	0.932937	1.02326
YDR111C	ALT2	0.78296	0.591127	0.640655	0.722426	0.815106	0.744041	0.834017	1.13834	1.18592	0.925029
YDR113C	PDS1	0.704488	0.714838	0.634517	0.726803	0.85448	0.756143	0.845983	0.889527	0.947489	0.921247
YDR115W	YDR115W	0.886719	0.835783	0.71235	0.839215	0.869191	0.791002	0.84497	0.904609	0.946781	0.937584
YDR116C	MRPL1	0.833215	0.82996	0.740243	0.87038	0.808717	0.880734	0.936225	0.952412	1.04685	0.969773
YDR117C	TMA64	1.05112	0.984776	0.961685	1.04408	1.01945	1.06549	0.955843	0.749837	1.02751	0.784474
YDR118W	APC4	1.05112	0.984776	0.961685	1.04408	1.01945	1.06549	0.955843	0.757481	0.860051	0.752143
YDR119W	YDR119W	0.730407	0.722088	0.669923	0.769437	0.779428	0.821538	0.738195	0.721353	0.755806	0.809002
YDR120C	TRM1	0.710642	0.722065	0.76187	0.842072	1.03801	0.906933	0.919503	0.658746	0.807581	0.796412
YDR121W	DPB4	0.710642	0.722065	0.76187	0.842072	1.03801	0.906933	0.919503	0.459976	0.619599	0.891164
YDR122W	KIN1	1.06603	1.00258	0.789062	0.788818	0.786746	0.824406	0.875932	0.975433	1.04705	0.97169
YDR123C	INO2	0.853522	0.939844	0.680499	0.814716	0.914435	0.814001	0.819481	0.652756	0.817415	0.784669
YDR124W	YDR124W	0.853522	0.939844	0.680499	0.814716	0.914435	0.814001	0.819481	0.359253	0.630395	0.615629
YDR125C	ECM18	0.769988	0.669008	0.686197	0.738364	0.952579	0.806921	0.851849	1.02347	0.974637	1.15706
YDR128W	YDR128W	0.934467	0.793519	0.701151	0.855927	0.848342	0.870349	0.831895	1.15294	1.06694	1.09073
YDR129C	SAC6	0.712233	0.659839	0.658478	0.75443	0.802694	0.775083	0.762944	0.77322	1.0245	0.885796
YDR130C	FIN1	1.16225	1.04493	0.989872	1.06098	1.07265	1.15298	1.18195	0.739325	0.865472	0.904181
YDR131C	YDR131C	0.731323	0.678644	0.691065	0.910391	0.964162	0.92304	0.93634	0.905852	0.996253	1.0781
YDR135C	YCF1	1.03635	0.9732	0.865898	0.952901	0.893494	0.91514	0.983659	0.831617	1.00676	0.901551
YDR137W	RGP1	1.20691	1.07918	1.04441	1.06124	1.04314	1.13792	1.04173	0.843109	0.891679	1.20167
YDR138W	HPR1	0.881688	0.85267	0.784366	0.835486	0.892626	0.866162	0.842407	0.754476	0.745288	0.89395
YDR139C	RUB1	0.939386	0.854243	0.845359	0.92029	1.0457	1.00107	0.936909	0.819654	0.981452	0.943272
YDR140W	MTQ2	0.939386	0.854243	0.845359	0.92029	1.0457	1.00107	0.936909	1.12849	1.12169	1.11492
YDR141C	DOP1	0.888062	0.784608	0.865641	0.902947	1.04335	0.991082	0.954296	0.861324	1.06391	0.990695
YDR142C	PEX7	0.697376	0.631688	0.637149	0.821577	0.879395	0.780847	0.751092	0.993447	1.05836	1.00382
YDR143C	SAN1	0.620263	0.655611	0.683551	0.812689	0.77474	0.751231	0.841231	0.701054	0.721235	0.639492
YDR144C	MKC7	0.779032	0.718105	0.712559	0.805848	0.860714	0.860605	0.805882	0.782968	0.892383	1.04706
YDR145W	TAF12	1.14602	1.10987	0.810217	0.892989	0.98751	0.951971	0.922043	0.839324	0.864364	0.913677
YDR146C	SWI5	0.806846	0.876532	0.82842	0.901414	1.05348	0.980341	1.03283	0.471759	0.721106	0.667763
YDR147W	EKI1	0.806846	0.876532	0.82842	0.901414	1.05348	0.980341	1.03283	0.471759	0.721106	0.667763
YDR148C	KGD2	1.04785	0.980001	0.830832	0.876207	1.05644	0.891663	0.926607	1.10539	1.1688	1.08816
YDR150W	NUM1	1.04785	0.980001	0.830832	0.876207	1.05644	0.891663	0.926607	0.422809	0.719358	0.72429
YDR151C	CTH1	0.685561	0.676033	0.629548	0.621559	0.84543	0.64116	0.828799	0.621991	0.940459	0.99032
YDR152W	GIR2	0.685561	0.676033	0.629548	0.621559	0.84543	0.64116	0.828799	0.621991	0.940459	0.99032
YDR155C	CPR1	0.654484	0.591903	0.510393	0.541649	0.656845	0.682206	0.700567	1.11707	1.0084	1.03116
YDR156W	RPA14	0.654484	0.591903	0.510393	0.541649	0.656845	0.682206	0.700567	1.13878	1.22145	1.15327
YDR159W	SAC3	0.655495	0.625254	0.697601	0.61614	0.801595	0.662421	0.796561	1.01411	1.06079	1.11009
YDR160W	SSY1	0.742141	0.76926	0.820991	0.866653	0.967797	0.929276	0.837835	0.598737	0.655051	0.696794
YDR161W	YDR161W	0.61935	0.606038	0.715979	0.734325	0.815234	0.748767	0.736976	0.778567	0.873451	0.810554
YDR162C	NBP2	1.10959	1.06401	1.07536	1.02047	1.14836	1.15617	1.18711	0.77633	0.833567	0.910283
YDR163W	CWC15	1.10959	1.06401	1.07536	1.02047	1.14836	1.15617	1.18711	0.943802	0.896574	0.875458
YDR164C	SEC1	1.15971	1.16937	1.09152	1.06402	1.18883	1.13849	1.22994	0.78491	0.894031	0.880325
YDR165W	TRM82	0.891064	0.922065	0.899336	0.950068	0.961393	0.876431	1.01314	0.514263	0.641684	0.743686
YDR166C	SEC5	1.17721	1.11284	1.10122	1.14755	1.22101	1.19805	1.15483	0.837679	0.862792	0.826104
YDR167W	TAF10	1.17721	1.11284	1.10122	1.14755	1.22101	1.19805	1.15483	0.813533	0.943095	1.0083
YDR168W	CDC37	1.10669	1.07309	0.989051	0.936796	1.01454	1.01997	1.03416	0.861718	0.90036	1.07929
YDR169C	STB3	1.03552	0.961128	0.813482	0.793267	0.938643	0.971118	0.943806	0.909599	1.05028	0.924395
YDR170C	SEC7	0.68504	0.585496	0.57027	0.64501	0.82501	0.78367	0.800953	1.19365	1.1933	1.17802
YDR171W	HSP42	0.883556	0.70509	0.628066	0.632408	0.66746	0.782314	0.73743	1.03254	1.03745	1.21469
YDR172W	SUP35	0.925081	0.913492	0.896685	0.886541	1.01976	0.923511	0.990825	0.698638	0.880775	1.01105
YDR173C	ARG82	0.677203	0.688366	0.530217	0.567964	0.70997	0.64205	0.678284	0.544055	0.844132	0.754156
YDR174W	HMO1	0.677203	0.688366	0.530217	0.567964	0.70997	0.64205	0.678284	0.584025	0.674939	0.78976
YDR175C	RSM24	1.12685	1.03085	0.827842	0.888363	1.18745	0.981732	0.977604	0.987692	0.819821	0.832757
YDR176W	NGG1	1.12685	1.03085	0.827842	0.888363	1.18745	0.981732	0.977604	0.841804	0.92238	0.780819
YDR177W	UBC1	0.72015	0.699976	0.732514	0.728612	0.78819	0.832661	0.770141	0.942018	1.12426	1.07319
YDR178W	SDH4	0.829022	0.743829	0.735073	0.72854	0.822306	0.810326	0.768062	0.921826	1.05973	1.11799
YDR179C	CSN9	0.908906	0.861881	1.13256	1.10264	1.15447	1.07952	1.17412	0.843583	1.00793	1.03912
YDR179W-A	YDR179W-A	0.908906	0.861881	1.13256	1.10264	1.15447	1.07952	1.17412	0.410817	0.578571	0.59922
YDR180W	SCC2	0.924029	0.880882	0.872723	0.84183	0.796217	0.953716	0.882766	0.998726	1.07098	1.18266
YDR181C	SAS4	0.743323	0.744812	0.815008	0.961425	1.02474	1.04265	0.91495	0.588573	0.74872	0.720201
YDR182W	CDC1	0.743323	0.744812	0.815008	0.961425	1.02474	1.04265	0.91495	0.678718	0.73128	0.806628
YDR183W	PLP1	1.02704	0.967844	1.04978	1.1047	1.23924	1.14139	1.13173	0.885739	1.05878	0.921308
YDR184C	ATC1	0.653921	0.719394	0.789092	0.836823	0.834526	0.807967	0.810249	0.362179	0.486829	0.543321
YDR185C	YDR185C	0.567459	0.565023	0.562805	0.648529	0.747783	0.691978	0.692841	0.566621	0.746864	0.903374
YDR186C	YDR186C	0.82296	0.823826	0.617952	0.739147	0.756032	0.805676	0.865364	0.651732	0.946914	0.855845
YDR188W	CCT6	0.656172	0.641218	0.5133	0.553021	0.582233	0.619845	0.609353	0.937189	0.978225	1.18886
YDR189W	SLY1	0.593814	0.617377	0.569845	0.621126	0.771737	0.708403	0.610418	0.628389	0.760197	0.772392
YDR190C	RVB1	0.858127	0.991036	0.795315	0.906925	0.967673	0.903873	0.981514	0.437333	0.606004	0.648971
YDR191W	HST4	0.858127	0.991036	0.795315	0.906925	0.967673	0.903873	0.981514	0.437333	0.606004	0.648971
YDR192C	NUP42	1.05372	1.11306	0.9326	0.992329	1.05366	1.05089	1.06822	0.603528	0.724268	0.684999
YDR194C	MSS116	0.861163	0.820136	0.848934	0.934334	1.04655	0.931851	0.972403	0.806116	0.907381	1.10684
YDR195W	REF2	0.688136	0.657213	0.677661	0.698707	0.930231	0.800463	0.833839	0.846877	0.852164	0.840887
YDR196C	YDR196C	0.999777	0.957989	0.902798	0.925921	1.03518	1.06363	0.945391	0.593913	0.749577	0.842151
YDR197W	CBS2	0.999777	0.957989	0.902798	0.925921	1.03518	1.06363	0.945391	0.717853	0.796782	0.78349
YDR198C	RKM2	0.93983	0.926635	0.863493	1.06783	1.05674	0.995068	0.996097	0.973646	0.956468	0.959844
YDR200C	VPS64	1.2403	1.2528	1.02194	1.11984	1.17625	1.1529	1.17034	0.751075	0.789977	0.741361
YDR201W	SPC19	1.2403	1.2528	1.02194	1.11984	1.17625	1.1529	1.17034	0.631379	0.677231	0.715751
YDR202C	RAV2	1.0892	1.1392	1.0656	0.995523	1.34323	1.07289	1.09101	0.629314	0.797719	0.765498
YDR204W	COQ4	1.0892	1.1392	1.0656	0.995523	1.34323	1.07289	1.09101	0.558925	0.752806	0.798127
YDR205W	MSC2	1.07843	1.09153	0.882828	0.941522	0.91342	0.955415	0.897252	0.774507	0.834921	0.899992
YDR206W	EBS1	0.737082	0.730863	0.753391	0.769596	0.89941	0.77895	0.813571	0.757824	0.830354	0.796148
YDR207C	UME6	1.22894	1.21027	0.866363	0.680484	0.842211	0.834309	0.902309	0.889324	0.934831	1.0461
YDR208W	MSS4	0.879788	0.83783	0.553807	0.60933	0.819228	0.671492	0.805964	0.769799	0.901797	0.952593
YDR210W	YDR210W	0.950001	0.809474	0.650252	0.786535	0.875289	0.786143	0.890709	1.08134	1.17513	1.167
YDR211W	GCD6	0.516283	0.486214	0.491032	0.52972	0.621872	0.551392	0.533976	0.973909	1.15418	1.1528
YDR212W	TCP1	0.681625	0.683395	0.693412	0.701689	0.835047	0.772807	0.790176	0.718229	0.853515	0.795312
YDR213W	UPC2	1.00019	0.836312	0.693967	0.83017	0.835514	0.876386	0.843477	0.813572	1.0394	1.10827
YDR214W	AHA1	0.75527	0.766835	0.522823	0.711959	0.713849	0.663969	0.696625	0.59059	0.649007	0.645766
YDR216W	ADR1	0.919491	1.06591	1.14047	0.986608	0.893706	0.994973	0.942458	0.360973	0.527086	0.50872
YDR217C	RAD9	1.16075	1.17262	1.06485	1.13834	1.03191	1.12258	1.08675	0.715908	0.791726	0.90486
YDR218C	SPR28	0.876016	0.784329	0.927683	0.884372	1.02748	0.904064	0.948756	0.865763	0.951478	0.907298
YDR219C	MFB1	1.18609	1.09567	0.990685	1.21915	1.14817	1.1267	1.12281	0.68428	0.890212	0.71838
YDR221W	GTB1	1.18609	1.09567	0.990685	1.21915	1.14817	1.1267	1.12281	0.68428	0.890212	0.71838
YDR222W	YDR222W	0.702815	0.644255	0.620723	0.556577	0.713239	0.645383	0.754748	0.97997	1.16741	1.24407
YDR223W	CRF1	1.07758	0.960031	0.945857	0.944872	1.22994	1.07984	1.1907	0.849218	0.875444	0.840385
YDR226W	ADK1	0.776389	0.623162	0.564297	0.691279	0.804009	0.701472	0.797694	0.744543	1.08277	0.969497
YDR227W	SIR4	0.791816	0.74352	0.797905	0.872798	1.05335	0.941639	0.958637	1.03721	1.05121	1.0528
YDR228C	PCF11	0.990235	0.955011	0.900285	0.945906	1.09861	0.973817	1.02508	0.936914	1.03735	1.04835
YDR229W	IVY1	0.979115	0.855803	0.822145	0.918265	1.0716	0.963054	0.896724	1.07901	1.15316	1.11495
YDR231C	COX20	1.0171	0.997058	0.741904	0.67491	0.75111	0.762243	0.774022	1.00414	1.06414	1.03092
YDR232W	HEM1	1.0171	0.997058	0.741904	0.67491	0.75111	0.762243	0.774022	0.782981	0.788024	0.886419
YDR233C	RTN1	0.62219	0.529658	0.585967	0.641313	0.801788	0.727736	0.792001	0.950477	1.0967	1.21694
YDR234W	LYS4	0.282456	0.224652	0.272812	0.296585	0.366037	0.310854	0.360827	0.948406	1.3258	1.13984
YDR237W	MRPL7	1.11601	1.05006	0.971812	1.2011	1.30456	1.17414	1.17558	0.927133	1.04165	1.06371
YDR238C	SEC26	1.14936	1.02581	0.92726	0.954774	1.00747	0.89075	0.97461	0.877262	1.03877	0.881
YDR239C	YDR239C	0.879164	0.899478	0.93028	0.966486	1.0241	1.05675	1.09238	0.77539	0.894347	0.834158
YDR240C	SNU56	0.991325	0.977956	1.01594	1.16793	1.26043	1.15735	1.21699	0.720288	0.912157	0.927742
YDR244W	PEX5	0.883546	0.942058	0.884933	0.937637	1.06449	0.96915	1.0724	0.597487	0.631407	0.815695
YDR245W	MNN10	0.666126	0.622881	0.773197	0.869549	0.881053	0.837407	0.952568	0.803324	1.04469	1.04872
YDR246W	TRS23	0.717188	0.695737	0.722186	0.738462	0.96857	0.789319	0.905995	0.798378	1.00699	0.942627
YDR247W	VHS1	0.894942	0.748508	0.642983	0.819479	0.803779	0.815713	0.766486	0.940329	1.02761	0.98864
YDR249C	YDR249C	0.926567	0.901997	0.709925	0.780778	0.970058	0.902477	0.88573	0.876195	0.973286	1.05269
YDR251W	PAM1	0.926567	0.901997	0.709925	0.780778	0.970058	0.902477	0.88573	0.876195	0.973286	1.05269
YDR252W	BTT1	0.764877	0.70461	0.833549	0.870578	0.966504	0.910441	0.923993	1.06127	1.12925	1.12897
YDR254W	CHL4	0.66432	0.714886	0.723129	0.770454	0.953855	0.732896	0.834286	0.51601	0.649356	0.682717
YDR255C	RMD5	0.797597	0.815906	0.806687	0.881039	1.0023	0.88586	1.02405	0.694991	0.830661	0.874465
YDR256C	CTA1	0.797424	0.795635	0.814848	0.932521	0.952858	0.777836	0.937015	0.754597	0.684572	0.826185
YDR257C	SET7	0.660887	0.595399	0.61754	0.717783	0.829759	0.68014	0.796252	1.05815	1.24219	1.27138
YDR259C	YAP6	0.207954	0.125291	0.159052	0.561977	0.218062	0.494918	0.16136	0.303345	0.496674	0.619616
YDR260C	SWM1	0.947475	0.854716	0.817609	0.868298	1.05352	0.93309	1.0879	0.91811	0.891007	0.908662
YDR261C	EXG2	0.840221	0.690222	0.70607	0.884596	0.918925	0.958881	0.937216	0.812022	0.685547	0.76122
YDR262W	YDR262W	0.480999	0.41479	0.482997	0.469067	0.596703	0.450073	0.569432	1.2227	1.17262	1.41911
YDR263C	DIN7	0.81377	0.805892	0.90176	1.03344	0.99406	0.931916	1.02505	0.71306	0.904366	0.865947
YDR264C	AKR1	0.970605	0.97142	0.867411	0.874121	1.16457	0.944115	1.02792	0.787371	0.939348	0.96384
YDR265W	PEX10	0.970605	0.97142	0.867411	0.874121	1.16457	0.944115	1.02792	0.743466	0.863715	0.81877
YDR266C	YDR266C	0.85748	0.742622	0.743551	0.790937	0.79932	0.839457	0.806949	0.777559	0.952547	1.1207
YDR267C	CIA1	0.96984	0.866287	0.882374	1.03942	0.915533	0.944035	0.990987	1.23908	1.20611	1.36697
YDR268W	MSW1	1.08494	1.02264	0.957903	1.10789	1.09825	1.06859	1.14535	0.955879	0.986501	1.03814
YDR270W	CCC2	1.14006	1.09704	0.851557	0.845304	0.866486	0.909801	0.932475	0.949317	1.11893	1.11959
YDR272W	GLO2	0.611698	0.594587	0.664673	0.75099	0.98926	0.740325	0.752028	0.830241	0.831889	0.993665
YDR273W	DON1	0.835303	0.724287	0.816356	0.879359	0.999044	0.915541	1.00689	0.889405	0.98879	1.12471
YDR275W	BSC2	0.928967	0.912628	0.749851	0.785208	0.989917	0.87878	0.899872	0.830782	0.995545	0.950969
YDR277C	MTH1	0.534514	0.501429	0.542102	0.718138	0.645906	0.712098	0.521722	0.652239	0.828402	0.76568
YDR279W	RNH202	1.03096	0.955431	0.956767	1.05145	1.12465	1.0473	1.10951	1.10419	1.17014	1.06519
YDR280W	RRP45	0.836038	0.786416	0.798789	0.907767	1.00828	0.928914	0.908014	1.04236	1.05765	0.893471
YDR281C	PHM6	1.01844	0.942191	0.922903	1.03019	0.967844	1.07402	1.03256	0.997223	1.09138	1.27944
YDR282C	YDR282C	1.19289	1.07364	1.08926	1.12288	1.2328	1.2538	1.12664	0.842971	0.812264	0.767226
YDR283C	GCN2	0.698012	0.625888	0.645941	0.737217	0.864585	0.766087	0.764189	0.718165	0.824934	0.950941
YDR284C	DPP1	0.798747	0.692975	0.668433	0.83219	0.993818	0.857891	0.966476	0.764449	0.991166	1.02745
YDR285W	ZIP1	0.798747	0.692975	0.668433	0.83219	0.993818	0.857891	0.966476	0.961986	1.04062	1.07731
YDR286C	YDR286C	1.10203	1.07544	1.05489	0.997108	1.22363	1.16912	1.028	0.735506	0.880583	0.95441
YDR287W	YDR287W	1.10203	1.07544	1.05489	0.997108	1.22363	1.16912	1.028	0.795996	0.941566	0.952576
YDR288W	NSE3	1.08917	0.926184	0.873183	0.914239	0.956294	1.01762	0.993978	1.07579	1.10036	1.08848
YDR289C	RTT103	0.851864	0.885592	0.962826	0.955116	1.12596	0.991099	0.991367	0.523045	0.734951	0.778813
YDR291W	HRQ1	0.851864	0.885592	0.962826	0.955116	1.12596	0.991099	0.991367	0.500822	0.647243	0.619144
YDR292C	SRP101	0.668175	0.690779	0.666909	0.738845	0.807153	0.818667	0.84267	0.689849	0.939484	0.876566
YDR293C	SSD1	0.880955	0.759393	0.661766	0.797303	0.998488	0.83734	0.933005	1.03125	1.18295	1.19894
YDR294C	DPL1	0.884882	0.87506	0.874702	0.969625	1.02315	0.883517	0.941786	0.715018	0.8369	0.927938
YDR295C	HDA2	0.724817	0.666593	0.674229	0.663404	0.872733	0.875561	0.707003	0.957239	0.994373	1.00897
YDR296W	MHR1	0.724817	0.666593	0.674229	0.663404	0.872733	0.875561	0.707003	0.959567	1.0205	0.9906
YDR297W	SUR2	0.804733	0.771486	0.648991	0.778344	0.744256	0.77614	0.75981	0.963281	1.05728	1.08867
YDR298C	ATP5	0.866946	0.812796	0.805883	0.838371	1.0343	0.883882	0.966592	1.0155	1.11685	0.929316
YDR299W	BFR2	0.947303	0.903802	0.929784	0.925222	1.11214	1.03069	1.06984	0.916055	0.983047	0.904196
YDR300C	PRO1	0.917727	0.948328	0.881491	0.826929	0.935217	0.873019	0.892262	0.417007	0.589003	0.486877
YDR301W	CFT1	1.3368	1.28078	1.02823	1.0256	1.06217	1.08265	1.0954	0.919086	1.0754	1.05283
YDR302W	GPI11	1.012	0.896502	0.94166	0.857346	0.981982	0.925957	0.848343	0.957021	1.1592	1.00637
YDR303C	RSC3	1.17943	1.18018	0.933953	0.804064	0.99484	0.94457	0.914935	0.824292	0.927481	0.805268
YDR304C	CPR5	0.954407	0.826076	0.792041	0.862526	0.963529	0.943758	0.962111	0.937269	0.89012	1.26088
YDR305C	HNT2	0.876374	0.873533	0.995258	0.985458	0.963128	0.934798	1.06812	0.780492	0.854676	0.842121
YDR306C	YDR306C	0.952033	0.782612	0.808002	0.880216	0.926928	1.09424	1.11136	0.885399	0.99865	1.09257
YDR307W	YDR307W	0.592632	0.532145	0.560975	0.604456	0.644073	0.729634	0.713495	0.778377	0.901494	1.07765
YDR308C	SRB7	0.856472	0.752896	0.898825	0.884716	1.07224	0.965003	1.0301	0.96177	1.18681	1.02069
YDR309C	GIC2	0.39889	0.369255	0.333581	0.478991	0.412302	0.549462	0.438936	0.870039	0.944278	0.912613
YDR310C	SUM1	0.831442	0.772403	0.74099	0.670323	0.8835	0.915802	0.814336	0.789786	0.961723	0.989279
YDR311W	TFB1	1.02129	0.963382	0.920487	0.858931	0.924544	0.958745	0.940965	0.975883	1.09385	1.01747
YDR312W	SSF2	1.02702	1.0981	0.963904	0.966947	0.856065	0.965479	0.948215	0.444528	0.595763	0.744154
YDR313C	PIB1	0.797857	0.755892	0.683484	0.671494	0.794	0.797514	0.75412	1.05394	1.21362	0.99991
YDR314C	RAD34	0.917496	0.976874	0.934766	1.02029	1.05501	1.0516	1.07872	0.502986	0.625781	0.682202
YDR315C	IPK1	1.0074	1.04917	0.880951	0.944217	1.03959	0.994334	1.02371	0.973857	0.930401	1.08258
YDR316W	OMS1	1.0074	1.04917	0.880951	0.944217	1.03959	0.994334	1.02371	0.644378	0.797252	0.756022
YDR317W	HIM1	0.582222	0.561867	0.732157	0.819302	0.941549	0.842693	0.847038	0.813017	0.996908	0.826189
YDR318W	MCM21	0.944908	0.933309	0.911748	1.06917	1.07587	1.03149	0.929825	0.720744	0.813476	0.722355
YDR319C	YDR319C	0.709197	0.702354	0.645547	0.758134	0.863802	0.755885	0.840665	0.735483	0.863134	0.946896
YDR320C	SWA2	1.17076	1.21234	1.07547	1.06098	1.07659	1.05763	1.16091	0.565894	0.755652	0.764354
YDR320C-A	DAD4	0.959381	0.999029	0.88468	0.925068	0.957454	0.896701	0.91278	0.597255	0.803023	0.694978
YDR321W	ASP1	0.959381	0.999029	0.88468	0.925068	0.957454	0.896701	0.91278	0.616887	0.702226	0.713908
YDR322C-A	TIM11	0.901188	0.830908	0.857538	0.854243	0.955076	0.958945	0.950588	1.00115	1.05123	0.951282
YDR322W	MRPL35	0.7867	0.728794	0.805876	0.865391	0.96896	0.819483	0.855661	1.15716	1.05011	1.25805
YDR323C	PEP7	1.01115	0.922772	1.04759	1.04957	1.052	1.05026	1.03968	1.04646	1.10402	1.12721
YDR324C	UTP4	0.877613	0.85538	0.854442	0.942881	0.981353	0.931571	1.0068	0.752894	0.795679	0.855393
YDR325W	YCG1	1.01699	1.01855	0.897943	1.03637	1.0837	1.02799	0.995433	0.866252	0.85952	0.913529
YDR326C	YSP2	0.955624	0.919895	0.751898	0.936847	0.881454	0.84573	0.884006	0.939461	1.05142	0.983385
YDR328C	SKP1	1.09219	0.997114	0.856607	0.835084	0.940136	0.959876	0.967932	1.06078	1.20336	1.00832
YDR329C	PEX3	1.36642	1.26533	1.04951	1.02615	0.970856	1.06202	1.0301	0.89727	1.16006	1.10181
YDR330W	UBX5	1.36642	1.26533	1.04951	1.02615	0.970856	1.06202	1.0301	0.921335	0.911358	1.22909
YDR331W	GPI8	0.89935	0.84713	0.829689	0.811484	0.948394	0.93592	0.953046	0.864926	0.967164	0.906416
YDR332W	IRC3	0.854199	0.893274	0.91419	0.973838	1.00225	1.03111	0.895154	0.486248	0.827867	0.79105
YDR333C	YDR333C	0.697171	0.597832	0.584558	0.676345	0.798108	0.640406	0.686619	1.01515	1.0042	1.0827
YDR334W	SWR1	0.697171	0.597832	0.584558	0.676345	0.798108	0.640406	0.686619	0.939297	0.959812	0.844439
YDR335W	MSN5	0.978976	0.871298	0.858689	0.855172	0.995861	0.87875	0.96737	0.95456	1.026	1.06237
YDR336W	YDR336W	0.95015	0.792424	0.82326	0.909876	0.978116	0.970439	0.912335	0.41197	0.518061	0.614712
YDR337W	MRPS28	1.12112	0.987366	1.05646	1.06045	1.09321	1.11064	1.05617	1.07148	1.14942	1.20668
YDR338C	YDR338C	1.04181	1.0232	0.917476	0.996417	1.20978	1.08435	1.13632	0.747225	0.978812	1.06632
YDR339C	FCF1	0.784394	0.677619	0.767571	0.742844	1.00691	0.876916	0.987582	0.782754	0.77341	0.882084
YDR343C	HXT6	0.614504	0.598681	0.618786	0.745094	0.628969	0.589634	0.452528	0.636902	0.782734	0.810963
YDR345C	HXT3	0.413479	0.416163	0.313079	0.554743	0.496631	0.521025	0.431804	0.639485	0.7401	0.860371
YDR346C	SVF1	0.961257	0.954828	0.845024	0.856281	0.974879	0.843043	0.85443	0.574689	0.761656	0.723436
YDR347W	MRP1	0.961257	0.954828	0.845024	0.856281	0.974879	0.843043	0.85443	0.517106	0.643297	0.893524
YDR348C	YDR348C	0.848004	0.839809	0.778866	0.805678	0.920944	0.858806	0.79297	0.595781	0.82884	0.834962
YDR349C	YPS7	1.04543	0.850933	0.885925	0.915648	0.865907	0.983848	0.911826	1.11423	1.18425	1.33261
YDR350C	TCM10	0.915637	0.802633	0.78828	0.837855	0.911897	0.853279	0.872577	0.862044	1.01815	0.975087
YDR351W	SBE2	0.915637	0.802633	0.78828	0.837855	0.911897	0.853279	0.872577	0.902429	1.03935	0.956501
YDR352W	YDR352W	0.662451	0.600722	0.626907	0.714822	0.72844	0.70122	0.692815	0.7093	0.879176	0.844773
YDR353W	TRR1	0.887577	0.780567	0.608599	0.787786	0.900947	0.748595	0.916062	0.940691	1.00841	1.00576
YDR356W	SPC110	1.12898	1.05769	0.89977	0.962738	0.972122	0.956945	1.02393	0.604021	0.80754	0.712956
YDR357C	YDR357C	0.720291	0.664481	0.691096	0.733592	0.841006	0.847983	0.921944	0.944924	0.986962	0.963341
YDR358W	GGA1	0.720291	0.664481	0.691096	0.733592	0.841006	0.847983	0.921944	0.846693	1.02743	0.981985
YDR359C	VID21	0.778424	0.789766	0.761839	0.727674	0.848556	0.746532	0.788596	0.70089	0.834148	0.819656
YDR361C	BCP1	0.671435	0.64017	0.756194	0.780743	0.911409	0.753312	0.851035	0.901455	1.04122	0.82788
YDR362C	TFC6	0.993346	0.971099	0.83161	0.959166	1.11985	1.00979	0.990943	0.557679	0.679928	0.801016
YDR363W	ESC2	0.993346	0.971099	0.83161	0.959166	1.11985	1.00979	0.990943	0.770854	0.930014	0.880694
YDR363W-A	SEM1	0.566319	0.467968	0.476296	0.597767	0.693559	0.606449	0.597653	0.936646	1.13552	1.14983
YDR364C	CDC40	0.823913	0.747943	0.824525	0.919407	0.981424	0.998153	0.944959	0.786532	0.863867	0.911205
YDR365C	ESF1	0.899349	0.90435	0.864336	0.887176	1.05453	0.953295	1.08518	0.587481	0.727011	0.777458
YDR367W	YDR367W	0.694197	0.652489	0.689242	0.852116	0.802276	0.795135	0.805738	0.75406	0.908323	1.00687
YDR368W	YPR1	0.939631	0.907954	0.917761	0.939065	1.06336	0.995875	0.992084	0.874937	1.02056	0.952296
YDR369C	XRS2	0.733603	0.815107	0.876839	0.868692	1.06387	0.877733	0.925269	0.482644	0.570687	0.531848
YDR370C	YDR370C	1.00217	0.993768	0.905228	0.966542	1.00447	0.976824	0.991774	0.826235	0.99874	1.00019
YDR372C	VPS74	0.853551	0.769884	0.703798	0.871416	0.961445	0.941723	0.936457	0.881601	1.15783	1.23745
YDR374W-A	YDR374W-A	0.706405	0.731133	0.76928	0.813818	0.901291	0.846837	0.917934	0.680825	0.794521	0.775143
YDR375C	BCS1	1.01667	0.937523	0.827012	0.92415	0.935034	1.04171	0.91643	0.932029	0.852115	0.989282
YDR376W	ARH1	1.01667	0.937523	0.827012	0.92415	0.935034	1.04171	0.91643	0.84804	0.907512	0.736173
YDR377W	ATP17	0.756117	0.657076	0.66004	0.738566	0.856925	0.751089	0.817218	0.622433	0.842055	0.951855
YDR378C	LSM6	1.0842	1.07998	0.849952	0.899992	0.907071	0.888802	0.982022	0.715615	0.88726	0.962898
YDR379W	RGA2	0.978202	1.02474	0.93111	0.942182	0.915768	0.991841	1.05351	0.585223	0.754354	0.723075
YDR381W	YRA1	0.558456	0.4646	0.63586	0.655977	0.81833	0.676327	0.704515	0.939776	1.01529	1.18906
YDR382W	RPP2B	0.464263	0.430283	0.423001	0.480215	0.597766	0.519331	0.578134	0.691656	0.889008	1.01768
YDR383C	NKP1	0.97926	0.920974	0.870908	0.913873	1.12829	1.03363	1.07119	0.717511	1.00623	0.878018
YDR385W	EFT2	0.434251	0.43105	0.451656	0.413235	0.53006	0.55378	0.63322	0.826678	0.895901	0.971991
YDR387C	YDR387C	1.16307	1.06717	0.868675	1.03285	0.994253	0.992177	1.04806	0.939173	1.09084	0.988911
YDR388W	RVS167	1.16307	1.06717	0.868675	1.03285	0.994253	0.992177	1.04806	0.842457	0.850821	0.824417
YDR389W	SAC7	0.773396	0.666827	0.529251	0.531101	0.676193	0.634986	0.686619	0.996087	1.15709	1.05345
YDR390C	UBA2	0.682552	0.630449	0.59271	0.605295	0.683791	0.647202	0.659325	1.10062	1.1247	1.18576
YDR391C	YDR391C	1.20847	1.13251	0.986898	0.974369	1.1371	1.14183	1.04576	0.973697	1.13034	1.18148
YDR392W	SPT3	1.20293	1.13152	0.979027	0.914422	1.15425	1.08912	1.07208	0.888031	1.04569	0.838773
YDR393W	SHE9	0.797252	0.781799	0.820418	0.804952	0.824576	0.834921	0.903428	0.504875	0.859834	0.739654
YDR394W	RPT3	0.93163	0.88719	0.864522	0.904509	0.978094	0.969506	1.01407	0.712422	0.829624	0.753841
YDR395W	SXM1	0.863201	0.827673	0.819409	0.846037	0.84299	0.851466	0.827532	0.68247	0.787579	0.721758
YDR397C	NCB2	0.90433	0.844047	0.721366	0.66704	0.820386	0.76354	0.951161	0.848921	1.09164	1.04797
YDR398W	UTP5	0.805864	0.845786	0.743906	0.73591	0.677297	0.751329	0.770724	0.781706	1.05634	1.00626
YDR399W	HPT1	0.590005	0.71503	0.687685	0.719989	0.733826	0.699928	0.74322	0.676296	0.826245	0.765049
YDR402C	DIT2	0.75497	0.801455	0.821968	0.936507	0.901479	0.908258	0.990534	0.550915	0.673202	0.814745
YDR403W	DIT1	0.75497	0.801455	0.821968	0.936507	0.901479	0.908258	0.990534	0.550915	0.673202	0.814745
YDR404C	RPB7	0.90883	0.823049	0.695887	0.753068	0.880879	0.833218	0.864135	1.10867	1.13427	1.42642
YDR405W	MRP20	0.90883	0.823049	0.695887	0.753068	0.880879	0.833218	0.864135	1.02329	1.02612	1.10981
YDR406W	PDR15	0.704511	0.662834	0.55385	0.586795	0.609071	0.704457	0.627576	0.877434	0.895937	1.00246
YDR407C	TRS120	1.08471	0.971714	0.761627	0.786854	0.964411	0.901563	0.895696	0.674376	0.957237	0.948043
YDR408C	ADE8	1.01498	0.928339	0.760623	0.823262	0.968652	0.873691	0.888995	0.881293	1.03475	0.845193
YDR409W	SIZ1	0.893142	0.756527	0.771378	0.783523	0.871113	0.834427	0.947302	1.03355	1.13672	1.31393
YDR410C	STE14	1.05391	1.03263	0.808445	0.858788	0.919098	0.965993	0.877393	0.787367	0.915563	0.839508
YDR411C	DFM1	1.12368	1.09229	1.01531	1.08459	1.05481	1.13761	1.11298	0.904648	0.909042	0.900846
YDR412W	RRP17	1.12368	1.09229	1.01531	1.08459	1.05481	1.13761	1.11298	0.904648	0.909042	0.900846
YDR414C	ERD1	0.871411	0.767658	0.781671	0.813767	0.88364	0.737163	0.929343	0.753593	0.922586	0.802603
YDR415C	YDR415C	1.05473	0.955071	1.03758	1.04996	1.26037	1.10121	1.26243	0.976475	0.961687	0.852376
YDR416W	SYF1	1.05473	0.955071	1.03758	1.04996	1.26037	1.10121	1.26243	0.976475	0.961687	0.852376
YDR418W	RPL12B	0.597394	0.484397	0.450637	0.50599	0.608249	0.57233	0.626873	0.661438	0.832511	0.780012
YDR419W	RAD30	1.16222	1.06139	1.04344	1.02993	1.18024	1.06064	1.02386	0.896542	1.08454	1.27727
YDR420W	HKR1	0.661519	0.554745	0.626593	0.676942	0.722051	0.697008	0.725036	0.800608	0.877244	0.924576
YDR421W	ARO80	0.846618	0.769173	0.741758	0.967941	0.998884	0.947273	0.95604	0.975695	1.09955	1.10398
YDR422C	SIP1	1.07465	1.03505	0.940119	0.879129	0.925707	0.933388	0.997114	1.06923	1.10676	1.10897
YDR423C	CAD1	1.16515	1.04585	0.943712	0.968918	1.12031	1.09357	1.06849	0.950902	0.957547	1.17809
YDR424C	DYN2	1.16118	1.04965	1.00477	1.04607	1.05152	1.09009	1.05219	0.973835	1.10845	1.10208
YDR427W	RPN9	0.657485	0.673177	0.728957	0.66299	0.920017	0.755102	0.737951	0.337537	0.439276	0.438717
YDR429C	TIF35	0.855215	0.847637	0.768388	0.905666	0.940252	0.886763	0.956043	0.572363	0.803393	0.755423
YDR430C	CYM1	0.681552	0.727613	0.670793	0.666982	0.665249	0.749452	0.853315	0.440907	0.562755	0.526512
YDR432W	NPL3	0.681552	0.727613	0.670793	0.666982	0.665249	0.749452	0.853315	0.496784	0.562888	0.55219
YDR434W	GPI17	0.783212	0.807262	0.870076	0.85315	0.929947	0.96719	0.883868	0.640928	0.662451	0.625778
YDR435C	PPM1	1.28117	1.24788	0.944331	0.909269	0.921471	1.0399	0.987912	0.51764	0.556709	0.565513
YDR436W	PPZ2	1.28117	1.24788	0.944331	0.909269	0.921471	1.0399	0.987912	0.759464	0.75174	0.897155
YDR437W	GPI19	0.641173	0.615541	0.743383	0.824466	0.98317	0.940844	0.893856	0.591941	0.639222	0.656898
YDR438W	THI74	1.00682	1.01978	1.03898	0.938309	1.08432	1.09665	1.10535	0.739668	1.00491	1.01965
YDR439W	LRS4	0.778684	0.762043	0.778672	0.91932	1.03303	0.943292	0.996756	0.666176	0.717243	0.676879
YDR440W	DOT1	1.00924	0.958174	0.942561	0.979983	1.15327	1.04637	0.983642	0.98143	1.12219	1.06624
YDR441C	APT2	0.511407	0.501745	0.460426	0.519244	0.497972	0.534131	0.45106	0.753865	1.06542	0.912145
YDR443C	SSN2	0.909598	0.850854	0.869368	0.977905	1.00662	0.962846	0.995451	1.10254	1.09682	1.13606
YDR444W	YDR444W	0.909598	0.850854	0.869368	0.977905	1.00662	0.962846	0.995451	0.925247	1.19997	1.2013
YDR446W	ECM11	1.01222	0.890402	0.947214	0.92423	1.06926	1.02426	1.01685	0.861322	0.894305	1.12227
YDR447C	RPS17B	0.680728	0.586392	0.615137	0.620873	0.771801	0.741299	0.784456	1.07876	1.04452	0.939643
YDR448W	ADA2	0.704214	0.613188	0.637274	0.649396	0.796796	0.758552	0.805193	0.833868	0.923335	0.927125
YDR449C	UTP6	0.921907	0.887721	0.872807	0.94602	0.973437	0.933417	0.997948	0.576415	0.803391	0.786161
YDR450W	RPS18A	0.475231	0.439064	0.465567	0.482504	0.648988	0.559119	0.69477	0.868941	0.881336	1.01527
YDR451C	YHP1	0.528148	0.538759	0.478027	0.509919	0.575618	0.542633	0.585976	0.607833	0.967139	0.914228
YDR452W	PPN1	0.528148	0.538759	0.478027	0.509919	0.575618	0.542633	0.585976	0.715549	0.774513	0.848913
YDR453C	TSA2	1.09773	1.08816	0.921619	0.985947	1.09943	1.10322	1.08694	0.836411	0.991519	0.927959
YDR454C	GUK1	1.03198	0.974026	0.919683	0.905797	0.963748	0.964949	0.957309	0.886258	0.917057	1.0287
YDR456W	NHX1	1.24641	1.15996	1.04761	0.89351	1.0622	0.979279	1.00393	0.816401	0.887762	0.821365
YDR457W	TOM1	0.674878	0.70361	0.77542	0.874395	0.947425	0.83277	0.810707	0.626338	0.751513	0.756335
YDR458C	HEH2	0.852433	0.759073	0.729571	0.880441	0.935176	0.912706	0.902527	0.821092	0.825351	0.948002
YDR459C	PFA5	1.07641	1.02838	0.855334	0.903795	0.989093	0.89799	0.955352	0.67563	0.829694	0.954034
YDR460W	TFB3	1.07641	1.02838	0.855334	0.903795	0.989093	0.89799	0.955352	0.511804	0.631881	0.670322
YDR462W	MRPL28	1.15926	0.972549	0.829814	0.85237	1.04753	1.00921	1.04417	0.935871	1.24525	1.24793
YDR463W	STP1	0.920103	0.833305	0.744241	0.80217	0.861174	0.862782	0.845254	0.951722	1.01254	0.974485
YDR464W	SPP41	0.40573	0.404203	0.499108	0.601505	0.609164	0.590741	0.616379	0.791621	0.805871	0.873677
YDR465C	RMT2	0.985048	0.990384	0.935529	0.909472	1.11992	0.992246	1.01918	0.655824	0.741936	0.874787
YDR466W	PKH3	1.02645	1.01052	0.91138	0.877459	1.016	0.943798	0.843767	0.848083	1.07414	0.928228
YDR468C	TLG1	0.898805	0.857867	0.819056	1.03047	1.10834	1.01684	1.03683	0.82978	0.880157	1.11335
YDR469W	SDC1	0.898805	0.857867	0.819056	1.03047	1.10834	1.01684	1.03683	0.901478	0.905544	1.12139
YDR470C	UGO1	0.545156	0.463683	0.527185	0.508969	0.580823	0.586711	0.664488	0.911219	1.13209	1.01849
YDR471W	RPL27B	0.545156	0.463683	0.527185	0.508969	0.580823	0.586711	0.664488	0.983065	1.10705	1.0009
YDR472W	TRS31	0.776009	0.81282	0.826199	0.945381	0.943872	0.863889	1.00417	0.585223	0.754354	0.723075
YDR473C	PRP3	1.09944	0.962276	0.965136	1.02758	0.948506	0.971155	1.01255	0.853244	1.07755	1.06605
YDR475C	JIP4	1.00553	0.860872	0.61604	0.65637	0.771872	0.807498	0.871688	0.874425	0.928701	1.02217
YDR476C	YDR476C	1.39758	1.26377	0.789173	0.851446	1.01783	0.837455	1.04477	0.995093	1.05899	1.28717
YDR477W	SNF1	1.17092	0.961876	0.872814	0.836792	1.05441	0.97508	0.911335	0.844661	1.0947	0.967087
YDR478W	SNM1	0.811816	0.78406	0.781555	0.813591	0.917383	0.849006	0.881366	0.972958	0.895677	1.05998
YDR479C	PEX29	1.14865	1.04887	0.97781	1.02825	1.10408	1.21347	1.10763	0.89024	1.03263	1.11105
YDR480W	DIG2	1.01592	0.994536	0.938821	1.00377	1.09923	1.13855	1.07028	0.873061	0.982596	1.02663
YDR483W	KRE2	0.966938	0.894544	0.77913	0.825939	0.841269	0.794693	0.876521	0.988121	1.14101	1.13966
YDR484W	VPS52	0.631602	0.604993	0.66221	0.806007	0.939988	0.882175	0.776572	0.792437	1.03463	1.02937
YDR485C	VPS72	0.883788	0.804786	0.820077	0.944291	1.03792	1.00509	1.01669	0.932123	1.16088	1.17308
YDR486C	VPS60	0.80365	0.805898	0.882596	0.838882	0.976514	0.842551	0.93523	0.695172	0.766658	0.768121
YDR488C	PAC11	1.18315	1.14114	0.921649	0.986081	1.0685	0.963331	1.12404	0.777193	0.819248	0.866327
YDR489W	SLD5	1.18315	1.14114	0.921649	0.986081	1.0685	0.963331	1.12404	0.928439	1.02794	0.998463
YDR490C	PKH1	0.753542	0.804359	0.611312	0.624665	0.76315	0.629851	0.64549	0.831122	1.02322	0.785591
YDR492W	IZH1	0.753542	0.804359	0.611312	0.624665	0.76315	0.629851	0.64549	0.630338	0.700422	0.702456
YDR493W	FMP36	0.906823	0.811908	0.92372	1.0079	1.1531	0.966342	1.0622	0.994304	1.04862	1.00619
YDR494W	RSM28	1.04887	1.0093	0.864028	0.902696	0.965837	0.995448	1.03103	0.558692	0.603412	0.646266
YDR495C	VPS3	0.669809	0.662325	0.81289	0.876213	0.848643	0.778463	0.881617	0.950677	0.938673	0.829664
YDR496C	PUF6	0.669786	0.663787	0.770071	0.843314	0.907142	0.943404	0.865555	0.733552	0.747112	0.950305
YDR497C	ITR1	0.774299	0.914062	0.757496	0.815347	0.956489	0.852144	1.00327	0.301726	0.367583	0.417261
YDR498C	SEC20	1.03465	0.992018	1.00855	1.05506	1.09952	1.10505	1.108	0.851118	1.05447	1.01784
YDR499W	LCD1	0.969237	0.835128	0.884786	0.89903	1.08607	0.900552	1.08102	0.735661	0.937451	1.06862
YDR500C	RPL37B	0.460771	0.436078	0.470139	0.517877	0.656618	0.580799	0.63879	0.815496	0.988378	0.998438
YDR501W	PLM2	0.460771	0.436078	0.470139	0.517877	0.656618	0.580799	0.63879	0.919549	0.899071	0.936859
YDR502C	SAM2	0.607038	0.615459	0.675367	0.719293	0.780721	0.689713	0.799464	0.717312	0.829003	1.18765
YDR503C	LPP1	0.850461	0.752164	0.930698	0.943669	1.03083	0.94277	0.963724	1.16224	1.19699	1.24747
YDR505C	PSP1	0.880864	0.747159	0.615268	0.629672	0.844205	0.68295	0.837102	0.963594	1.05544	0.876835
YDR506C	YDR506C	0.608328	0.553333	0.571791	0.511645	0.605689	0.585274	0.638052	0.868616	1.08296	0.868144
YDR507C	GIN4	0.66941	0.648057	0.657901	0.789945	0.839916	0.825389	0.88809	0.924616	1.08237	0.992335
YDR508C	GNP1	0.374328	0.407829	0.381249	0.415523	0.471887	0.499493	0.495108	0.737968	0.833132	0.730017
YDR510W	SMT3	0.405857	0.438108	0.41563	0.455968	0.513955	0.539507	0.526758	0.55171	0.981043	0.899889
YDR511W	ACN9	1.0371	0.978803	0.847134	0.939669	1.13187	0.969899	1.12535	0.914198	0.896381	0.919785
YDR512C	EMI1	1.00471	0.813235	0.755404	0.855585	1.05774	0.977175	0.93977	1.051	1.06581	1.43942
YDR514C	YDR514C	0.862205	0.857852	0.883501	0.854621	1.00347	0.95531	1.00776	0.566409	0.748166	0.770305
YDR515W	SLF1	0.862205	0.857852	0.883501	0.854621	1.00347	0.95531	1.00776	0.878363	0.995427	0.999326
YDR516C	EMI2	1.26971	1.1751	1.06484	1.02993	1.28823	1.10183	1.1227	0.914657	1.17308	1.00367
YDR517W	GRH1	1.11056	0.928917	0.706886	0.783742	0.819327	0.876391	0.90067	1.03042	0.996342	0.954927
YDR518W	EUG1	0.827301	0.835486	0.717187	0.801207	0.876663	0.796807	0.797663	0.739331	0.889098	0.928598
YDR519W	FPR2	1.01427	0.869882	0.863737	1.00272	0.972851	0.93967	1.0163	0.857548	0.999412	1.15986
YDR520C	YDR520C	0.838441	0.797022	0.796842	0.841497	0.912566	0.884894	0.900326	0.905357	1.09788	1.04016
YDR522C	SPS2	0.523521	0.540788	0.658866	0.746063	0.743982	0.657525	0.74081	0.522167	0.649285	0.644171
YDR523C	SPS1	0.616861	0.598027	0.638759	0.719505	0.690307	0.59265	0.667913	0.822455	0.85857	0.707548
YDR524C	AGE1	0.450617	0.420542	0.41058	0.444991	0.441696	0.425845	0.42679	0.934308	1.10454	1.02731
YDR524C-B	YDR524C-B	0.30592	0.218071	0.222217	0.249102	0.186793	0.274698	0.210592	0.659919	0.795848	0.868664
YDR525W-A	SNA2	0.256701	0.188853	0.177953	0.232906	0.314678	0.241549	0.324887	0.755527	0.827703	0.905298
YDR527W	RBA50	0.745352	0.552037	0.597576	0.596707	0.94167	0.669464	0.858719	0.617863	0.907538	0.800839
YDR528W	HLR1	0.668522	0.673575	0.592602	0.632342	0.769295	0.661359	0.741094	0.503536	0.687481	0.719754
YDR529C	QCR7	1.06424	0.955251	0.78106	0.812722	0.89517	0.833711	0.917256	1.067	1.11816	1.15722
YDR530C	APA2	1.1526	0.952297	0.904288	0.908453	1.1753	0.96074	1.12277	0.934803	1.14915	1.36687
YDR532C	YDR532C	1.06012	1.05671	1.1371	1.10864	1.16218	1.21671	1.14311	0.581116	0.708794	0.863553
YDR534C	FIT1	0.913233	0.890811	0.916415	0.87401	0.922741	0.930466	0.953003	0.891456	1.08907	1.07827
YDR536W	STL1	0.945237	0.925991	0.682621	0.685728	0.686968	0.736525	0.717864	0.759066	0.770455	0.790844
YDR538W	PAD1	0.993116	0.953718	0.95832	0.962059	0.972139	0.911225	1.00519	0.977033	0.876826	1.0158
YDR539W	YDR539W	0.817438	0.789903	0.785866	0.946679	1.01179	0.878849	0.930443	0.740936	0.858642	0.824996
YDR541C	YDR541C	0.839244	0.738661	0.765086	0.809499	0.910408	0.845039	0.821528	0.843687	1.04967	1.06677
YEL001C	YEL001C	0.923211	0.79327	0.856437	0.939511	1.06109	0.956751	0.98934	0.941971	1.05777	1.27183
YEL002C	WBP1	0.754343	0.672005	0.787946	0.870347	1.02399	0.843368	0.947509	1.07205	1.13485	1.21501
YEL003W	GIM4	0.871074	0.796739	0.855954	0.853217	1.09436	1.02551	0.993913	0.695075	0.802379	0.959956
YEL004W	YEA4	1.11391	1.06438	1.08995	1.04058	1.27921	1.04974	1.30876	0.849835	0.952931	1.01706
YEL005C	VAB2	1.11391	1.06438	1.08995	1.04058	1.27921	1.04974	1.30876	0.876118	0.930738	0.935193
YEL006W	YEA6	0.651379	0.579578	0.635532	0.710082	0.822127	0.688346	0.787436	0.793847	0.860532	1.02064
YEL007W	YEL007W	0.315597	0.291925	0.296219	0.546251	0.444375	0.554369	0.423719	1.00158	0.985875	1.02155
YEL009C	GCN4	0.401819	0.369034	0.389977	0.439075	0.532353	1.44414	0.548826	1.1762	1.23807	1.20031
YEL011W	GLC3	1.23752	1.0647	1.03523	0.980542	1.1498	1.19755	1.08962	1.0699	1.21445	1.1067
YEL012W	UBC8	0.823326	0.727608	0.754336	0.783956	0.947995	0.869916	1.00804	0.789358	0.735964	0.933703
YEL013W	VAC8	0.738882	0.703519	0.738533	0.808631	0.877924	0.800029	0.905077	0.88866	0.990046	1.03797
YEL015W	EDC3	0.944091	0.878734	0.825766	0.825612	1.02268	0.925958	0.981197	1.15456	1.09389	1.03209
YEL016C	NPP2	0.944091	0.878734	0.825766	0.825612	1.02268	0.925958	0.981197	0.902281	0.921607	0.870133
YEL017W	GTT3	0.465935	0.437093	0.330714	0.355357	0.414022	0.378715	0.423445	0.748457	0.92606	0.839135
YEL018W	EAF5	1.05592	0.985	1.10148	1.14812	1.21846	1.04726	1.2154	0.818322	0.973911	0.935228
YEL019C	MMS21	1.05592	0.985	1.10148	1.14812	1.21846	1.04726	1.2154	0.927629	0.963592	0.980312
YEL020C	YEL020C	0.856333	0.915635	0.839603	0.848595	0.834907	0.912286	0.938656	0.303345	0.496674	0.619616
YEL020W-A	TIM9	0.406747	0.383344	0.381613	0.314337	0.42142	1.22618	0.416679	0.600956	0.721271	0.681103
YEL022W	GEA2	0.797277	0.751379	0.878062	0.895696	1.06602	0.911544	0.965067	0.904146	0.92357	1.02655
YEL023C	YEL023C	0.797277	0.751379	0.878062	0.895696	1.06602	0.911544	0.965067	0.346958	0.497596	0.514137
YEL024W	RIP1	0.951482	0.844649	0.849754	0.910767	0.988301	0.871915	0.916226	0.903875	1.1801	1.03334
YEL025C	YEL025C	1.11191	0.961117	0.872414	0.993481	1.16755	1.01878	0.997789	1.15005	1.1436	1.01364
YEL026W	SNU13	0.493632	0.493661	0.629141	0.677717	0.906424	0.686693	0.723416	0.708087	0.919443	0.782711
YEL027W	CUP5	0.432202	0.383637	0.428326	0.49704	0.610777	0.45987	0.577903	1.05615	1.1946	1.2191
YEL029C	BUD16	1.15582	1.02866	1.09662	1.14333	1.08339	1.16321	1.20681	0.662338	0.66794	0.706354
YEL030W	ECM10	0.773313	0.718921	0.879747	0.904473	0.948004	0.893094	0.951452	0.718078	0.808061	0.939291
YEL031W	SPF1	1.01752	0.966067	0.888699	0.900348	1.00007	1.00511	0.97278	1.05623	1.0876	1.0135
YEL032W	MCM3	0.404545	0.37052	0.394817	0.44348	0.486978	0.432834	0.490808	0.930043	1.08563	1.10607
YEL034W	HYP2	0.385251	0.41668	0.410134	0.571298	0.426949	0.682892	0.551233	0.42523	0.552785	0.646172
YEL036C	ANP1	0.68483	0.680075	0.646595	0.805653	0.695629	0.863868	0.774864	0.776615	0.732019	0.765736
YEL037C	RAD23	0.808653	0.790266	0.82574	0.790143	0.911823	0.79961	0.796069	0.805219	0.844629	0.946495
YEL038W	UTR4	0.877653	0.88101	0.807814	0.779705	0.87061	0.946562	0.827518	0.854209	0.864565	0.782571
YEL039C	CYC7	0.877653	0.88101	0.807814	0.779705	0.87061	0.946562	0.827518	0.678742	0.774378	1.04463
YEL040W	UTR2	0.637611	0.65584	0.529277	0.763774	0.655809	0.786394	0.57487	0.480013	0.607172	0.539997
YEL041W	YEF1	0.883546	1.03482	0.99124	1.09206	1.02678	0.952945	1.04483	0.338222	0.492383	0.334165
YEL042W	GDA1	0.678135	0.668907	0.678441	0.767466	0.83195	0.775217	0.828799	0.743574	0.874528	0.879236
YEL043W	YEL043W	1.09429	0.999795	0.760674	0.843629	0.913222	0.821228	0.923985	0.85068	1.11072	1.09548
YEL044W	IES6	0.46908	0.536123	0.297507	0.589478	0.630136	0.657428	0.65724	0.718285	0.850417	0.935589
YEL046C	GLY1	0.268127	0.28357	0.226217	0.391423	0.340026	0.427506	0.417002	0.621367	0.735267	0.667314
YEL048C	YEL048C	0.826248	0.774151	0.746233	0.767385	0.871226	0.830388	0.814521	0.946466	0.964546	1.09381
YEL049W	PAU2	1.1631	1.14737	1.19399	1.16019	1.13563	1.17443	1.16843	0.781691	0.960052	0.903777
YEL050C	RML2	0.848782	0.843668	0.793753	0.817848	0.992397	0.835642	0.898684	0.795466	1.00166	0.895882
YEL051W	VMA8	1.06007	0.983089	0.961449	0.960175	0.943626	0.95622	0.946862	0.706559	0.881647	0.832408
YEL052W	AFG1	1.10839	0.977323	0.993391	0.968385	0.975356	1.02583	1.07047	0.667535	0.84249	0.731585
YEL053C	MAK10	1.0989	1.08162	1.05524	1.06862	0.968495	1.07122	1.03274	0.733237	1.05234	0.941551
YEL054C	RPL12A	0.592778	0.44222	0.401058	0.496257	0.48479	0.509922	0.546624	0.694437	0.984999	0.949965
YEL055C	POL5	0.820859	0.748202	0.816967	0.844911	1.10619	0.884106	1.03148	1.08362	1.13683	1.16851
YEL056W	HAT2	1.05504	1.06117	1.0325	1.05219	1.33421	1.16544	1.19817	0.50568	0.947324	0.954036
YEL057C	YEL057C	0.829042	0.768928	0.855726	0.931193	1.04555	0.902765	1.00817	0.807971	0.976604	0.894806
YEL058W	PCM1	1.27944	1.27266	1.10059	1.03731	1.04693	1.05175	1.09158	0.674092	0.892577	0.878417
YEL059C-A	SOM1	1.52887	1.48706	1.09261	1.01231	1.02986	1.10488	1.12895	0.930071	1.05664	0.99989
YEL061C	CIN8	0.595609	0.565066	0.658927	0.769246	0.922552	0.807147	0.951142	1.07885	1.19642	1.27237
YEL062W	NPR2	1.18167	1.1327	1.07717	1.28413	1.20519	1.30302	1.4072	0.899032	1.01274	0.947757
YEL064C	AVT2	0.673274	0.651168	0.743673	0.716272	0.869016	0.794124	0.821897	0.74654	0.833608	0.889041
YEL065W	SIT1	0.952654	1.0723	0.889726	0.944037	0.950429	0.906367	0.904978	0.348624	0.513983	0.509589
YEL066W	HPA3	1.35388	1.13904	0.996261	0.912608	0.899574	0.96588	1.03393	0.994375	1.07098	1.12739
YEL072W	RMD6	0.878039	0.92567	0.783002	0.839004	0.937528	0.798247	0.912366	0.503801	0.628245	0.635903
YER001W	MNN1	0.430211	0.369979	0.328698	0.625338	0.470995	0.605785	0.463089	1.18993	1.06227	0.938537
YER002W	NOP16	0.758294	0.739986	0.843472	0.900565	1.02454	0.86563	0.935238	0.624537	0.838259	0.925569
YER003C	PMI40	0.975502	0.982088	0.769308	0.80093	0.884606	0.868116	0.870599	0.702751	0.803075	0.668962
YER004W	FMP52	1.42616	1.48426	1.08877	1.0322	1.07924	1.06322	1.09855	0.486564	0.709914	0.689419
YER005W	YND1	1.02949	0.9306	0.809873	0.853298	0.994227	0.920389	0.898234	0.973835	1.10845	1.10208
YER006W	NUG1	0.976109	0.850834	0.913373	0.837354	0.937297	0.904261	0.9039	1.03393	1.144	0.993435
YER007C-A	TMA20	0.932545	0.944633	1.0352	1.04735	1.18271	1.03053	1.11851	0.628569	0.851624	0.858206
YER008C	SEC3	1.03361	1.00497	1.01773	1.00149	1.0529	1.00849	0.996761	0.82105	1.00044	1.07263
YER009W	NTF2	1.03361	1.00497	1.01773	1.00149	1.0529	1.00849	0.996761	0.933357	0.943371	0.976805
YER010C	YER010C	1.20523	1.08662	1.02087	1.00008	1.08531	1.05539	1.03032	0.912821	1.03586	1.3235
YER011W	TIR1	0.966429	0.89407	0.773388	0.940388	0.844156	0.965039	0.843717	0.739832	0.817774	0.728202
YER012W	PRE1	1.01105	0.914348	0.919806	0.971488	1.15263	1.05435	1.11725	0.782204	1.04585	1.07321
YER013W	PRP22	0.765705	0.780891	0.856521	0.833575	0.963763	0.91198	0.944154	0.670069	0.701665	0.72095
YER014W	HEM14	0.833971	0.857312	0.978031	1.03238	1.0087	0.967439	0.962264	0.487368	0.685736	0.611822
YER015W	FAA2	1.05717	0.968979	0.883441	0.965212	0.852181	0.957912	0.969851	0.719619	0.903038	0.878214
YER016W	BIM1	1.25937	1.01842	1.0267	1.01001	1.12033	1.13821	0.997336	0.913201	1.1202	1.09328
YER017C	AFG3	0.933424	0.882444	0.657153	0.588337	0.634032	0.589148	0.664887	0.871729	1.00662	0.967392
YER018C	SPC25	1.14023	1.07573	0.861432	0.916688	0.989198	0.923686	1.04358	0.977419	0.989192	1.06012
YER019C-A	SBH2	0.917252	0.737855	0.603874	0.683868	0.888408	0.857271	0.891106	0.713506	0.862554	1.02325
YER019W	ISC1	1.14023	1.07573	0.861432	0.916688	0.989198	0.923686	1.04358	0.845754	0.620378	0.463509
YER021W	RPN3	0.634046	0.635143	0.605132	0.671265	0.764201	0.684926	0.715066	0.969076	0.957748	0.948364
YER022W	SRB4	0.742877	0.728067	0.770122	0.836963	0.975154	0.815225	0.844655	1.0748	1.16658	1.02354
YER023W	PRO3	1.05155	1.06384	0.926121	0.991902	0.934554	1.00204	0.929775	0.77117	0.964316	0.935093
YER025W	GCD11	0.991156	0.895445	0.859236	0.860801	0.907586	0.846449	0.952784	0.867595	0.969012	1.00085
YER026C	CHO1	0.62643	0.632109	0.742624	0.726718	0.902547	0.843436	0.895066	0.788886	0.822737	0.696918
YER027C	GAL83	1.11529	1.0932	0.901457	0.977618	1.06359	1.02163	1.00957	0.727617	0.862022	0.770189
YER028C	MIG3	0.460844	0.306415	0.42322	0.646141	0.612335	0.761698	0.570779	0.668668	0.841644	1.00206
YER029C	SMB1	0.868508	0.871693	0.908203	0.940619	1.19481	0.991633	1.12618	0.771585	0.911818	0.923321
YER030W	CHZ1	0.868508	0.871693	0.908203	0.940619	1.19481	0.991633	1.12618	0.847818	0.934521	0.937353
YER031C	YPT31	1.10242	1.12879	0.908586	0.90848	0.914395	1.00857	0.986475	0.554181	0.674459	0.766811
YER032W	FIR1	1.10242	1.12879	0.908586	0.90848	0.914395	1.00857	0.986475	0.942202	0.907822	0.889921
YER033C	ZRG8	0.980164	0.872157	0.771146	0.670343	0.810863	0.856011	0.823219	1.23866	1.3562	1.35147
YER034W	YER034W	0.636742	0.617758	0.57721	0.618248	0.700431	0.67621	0.642435	0.834396	0.947894	0.991532
YER036C	ARB1	0.472706	0.444991	0.472596	0.485455	0.669823	0.585696	0.608574	0.88247	0.885338	1.24599
YER039C	HVG1	0.975714	1.07213	0.768495	0.819908	0.873751	0.888454	1.0136	0.546292	0.788977	0.844712
YER039C-A	YER039C-A	0.975714	1.07213	0.768495	0.819908	0.873751	0.888454	1.0136	0.546292	0.788977	0.844712
YER041W	YEN1	0.705759	0.63291	0.802532	0.755568	1.03134	0.912813	0.875136	1.00204	1.11835	1.09611
YER042W	MXR1	0.970928	0.995298	0.829512	0.845272	0.953847	0.883797	0.906595	0.550438	0.760801	0.753127
YER043C	SAH1	0.647009	0.726329	0.685167	0.792457	0.879032	0.787236	0.866147	0.771036	1.13278	1.03202
YER044C	ERG28	0.703286	0.665692	0.585527	0.737221	0.788082	0.689987	0.787157	0.811236	0.873071	0.969809
YER045C	ACA1	0.666925	0.532752	0.556687	0.770079	0.7085	0.739203	0.691038	1.07406	1.47195	1.44553
YER046W	SPO73	0.986058	0.890147	0.836445	0.975443	1.06461	0.996087	1.00902	0.991555	1.02618	1.20475
YER047C	SAP1	0.624757	0.617303	0.703889	0.74666	0.819902	0.73015	0.749574	0.812809	0.942983	0.995479
YER048C	CAJ1	0.950256	0.923574	0.811603	0.788493	0.914504	0.973728	0.912611	0.792607	0.901714	1.22783
YER048W-A	ISD11	0.707698	0.663287	0.801766	0.829068	0.986909	0.832557	0.918578	0.801847	0.90884	0.977949
YER049W	TPA1	0.707686	0.638085	0.769195	0.780296	1.02925	0.858168	0.989446	0.779228	0.944907	1.04293
YER050C	RSM18	1.1236	1.03103	1.05268	1.03736	1.16254	1.10151	1.15846	0.809151	0.990104	1.05492
YER054C	GIP2	0.870814	0.837282	0.816257	0.826652	0.911213	0.917935	0.905611	0.788564	0.823918	0.725945
YER056C	FCY2	0.313777	0.2798	0.328532	0.367788	0.47591	0.428775	0.468419	0.746584	0.884036	0.754892
YER056C-A	RPL34A	0.54536	0.476974	0.481638	0.516714	0.658384	0.57119	0.586605	0.738346	0.736566	0.875944
YER057C	HMF1	1.23599	1.03325	0.961542	0.984305	1.1734	0.995288	1.1371	0.69838	0.708922	0.710862
YER059W	PCL6	0.735841	0.680099	0.720556	0.801115	0.782126	0.785848	0.774017	0.885579	0.895135	0.899428
YER060W	FCY21	0.767509	0.701972	0.75656	0.755493	0.927131	0.835505	0.832695	0.817773	0.973543	0.909926
YER063W	THO1	0.918788	0.793679	0.787196	0.723365	1.07154	0.862899	1.03144	1.05923	1.08445	1.07457
YER065C	ICL1	0.757896	0.667605	0.658855	0.617542	0.810203	0.634566	0.859726	0.71514	0.796969	0.823464
YER066W	YER066W	1.22202	1.07822	0.980726	0.986058	1.0801	1.05952	1.10735	0.897881	1.02544	1.11408
YER070W	RNR1	0.571656	0.483018	0.51494	0.544983	0.608531	0.583411	0.584253	0.706482	0.951618	0.938092
YER071C	YER071C	1.08809	0.938702	0.947158	0.992673	1.29833	1.20946	1.28773	0.737521	0.693321	0.988069
YER072W	VTC1	0.974485	0.908629	0.738598	0.755333	1.02516	0.869424	0.943401	0.802211	0.965385	0.848959
YER074W	RPS24A	0.392439	0.323573	0.402752	0.401381	0.576811	0.484861	0.537726	1.12717	1.12229	1.22204
YER074W-A	YOS1	0.781392	0.729377	0.791686	0.882536	0.995897	0.9365	1.0384	0.863615	0.922453	1.04472
YER075C	PTP3	0.827623	0.69991	0.596522	0.593609	0.626075	0.726545	0.771233	0.745485	0.938609	0.948276
YER077C	YER077C	0.890379	0.83971	0.930721	0.947169	0.968827	0.936974	1.00933	0.919425	1.10512	1.22928
YER078C	YER078C	0.796894	0.624268	0.697386	0.8564	0.876713	0.785515	0.867457	1.0685	1.12008	0.851182
YER080W	FMP29	0.966428	0.924032	0.785446	0.846801	0.949606	0.895565	0.943748	0.828655	1.04203	0.868684
YER082C	UTP7	0.718171	0.701664	0.783982	0.803768	0.98162	0.924673	0.887768	0.78396	0.826542	0.795609
YER083C	GET2	1.21771	1.1548	0.908385	0.85018	0.949676	0.974113	1.02706	1.01892	1.08481	1.02729
YER087C-B	SBH1	0.740164	0.691147	0.739736	0.706915	0.943875	0.813409	0.84127	1.10999	1.00538	1.01666
YER087W	YER087W	0.834541	0.733031	0.820151	0.863164	1.01161	0.88223	0.95123	0.858768	1.19777	1.35727
YER088C	DOT6	0.527913	0.488568	0.468599	0.374014	0.464612	0.570188	0.493911	0.682826	0.853487	1.04016
YER089C	PTC2	0.771162	0.609755	0.657281	0.683735	0.796774	0.713055	0.791708	0.871904	1.11345	1.02878
YER092W	IES5	0.523352	0.421409	0.476295	0.487813	0.543926	0.423333	0.616847	0.672944	0.942046	1.03318
YER093C	TSC11	1.28488	1.08308	1.00808	1.0906	1.06056	0.95027	1.1012	0.806477	0.997471	0.965239
YER093C-A	YER093C-A	0.98457	1.01801	0.963331	1.00445	1.02105	1.03478	1.01576	0.607216	0.771824	0.902321
YER094C	PUP3	1.32141	1.18735	0.7698	0.825844	0.932141	0.869109	0.889657	0.7745	0.915044	0.971768
YER095W	RAD51	1.1396	1.18139	0.882048	0.860037	1.00236	0.97706	0.991195	0.62035	0.690623	0.703129
YER096W	SHC1	0.826139	0.666732	0.919522	0.849576	0.900513	1.01813	0.85852	1.06072	1.20752	1.28727
YER098W	UBP9	0.646492	0.543497	0.605812	0.725061	0.721861	0.791239	0.738611	1.30743	1.32885	1.29513
YER099C	PRS2	1.29005	1.1546	0.988268	1.01352	1.12836	1.09393	1.1211	0.815548	1.00689	0.951478
YER100W	UBC6	1.29998	1.15874	0.947323	1.09368	1.05729	1.0356	1.12762	0.987006	1.00608	0.983658
YER101C	AST2	0.568357	0.55168	0.554676	0.562936	0.682328	0.618871	0.678833	0.824925	0.81193	0.981696
YER102W	RPS8B	0.575434	0.558001	0.558959	0.567964	0.687992	0.623966	0.684002	0.577242	0.70869	0.770671
YER104W	RTT105	0.873869	0.876607	0.802987	0.889906	0.914835	0.900835	0.990827	0.84939	0.991305	0.965472
YER105C	NUP157	0.660363	0.637842	0.780721	0.921705	0.955406	0.869858	0.836337	0.747926	0.889473	0.963161
YER106W	MAM1	0.660363	0.637842	0.780721	0.921705	0.955406	0.869858	0.836337	0.932682	0.995342	0.768014
YER107C	GLE2	0.686477	0.693831	0.775897	0.799097	0.869808	0.774764	0.820813	0.742804	0.681939	0.695532
YER109C	FLO8	1.11249	1.01803	0.895931	0.840524	0.881998	0.935157	0.885385	1.12885	1.14555	1.20247
YER110C	KAP123	0.579538	0.551059	0.570253	0.684091	0.689928	0.683856	0.653744	0.98744	0.885818	0.924177
YER111C	SWI4	0.67697	0.687765	0.609428	0.802642	0.755997	0.665974	0.712563	0.480299	0.502929	0.608307
YER112W	LSM4	0.615708	0.630815	0.700603	0.740604	0.879982	0.783516	0.862811	1.01791	1.05641	0.935316
YER113C	YER113C	0.70731	0.661684	0.733338	0.768666	0.814671	0.877536	0.805554	1.07054	1.22533	0.988557
YER114C	BOI2	0.76369	0.676187	0.725343	0.729372	0.822832	0.79668	0.850273	1.27356	1.26387	1.20016
YER115C	SPR6	0.718519	0.615646	0.769949	0.902938	1.10061	0.946257	1.04658	1.24755	1.21507	1.31087
YER116C	SLX8	0.553112	0.495526	0.557808	0.551112	0.662921	0.630263	0.67697	0.662909	1.10617	0.939043
YER117W	RPL23B	0.553112	0.495526	0.557808	0.551112	0.662921	0.630263	0.67697	0.994552	1.16834	0.990163
YER118C	SHO1	0.900771	0.864172	0.761752	0.85608	0.987424	0.97885	0.950795	0.93028	0.945234	1.0557
YER119C	AVT6	1.19388	1.01516	0.844295	0.789229	0.835195	0.927519	0.871556	1.00224	0.973712	0.984661
YER120W	SCS2	1.19388	1.01516	0.844295	0.789229	0.835195	0.927519	0.871556	1.16249	1.05723	1.19377
YER122C	GLO3	0.983599	0.856205	0.790885	0.813886	0.858311	0.868788	0.855762	1.08137	1.1667	1.11736
YER123W	YCK3	0.983599	0.856205	0.790885	0.813886	0.858311	0.868788	0.855762	1.13486	1.25743	1.33977
YER124C	DSE1	0.678427	0.592365	0.586601	0.653347	0.769212	0.730092	0.677332	0.930529	0.945478	1.13413
YER125W	RSP5	0.678427	0.592365	0.586601	0.653347	0.769212	0.730092	0.677332	0.930529	0.945478	1.13413
YER126C	NSA2	0.880652	0.941245	0.978361	0.959381	1.0509	0.924355	0.924	0.371388	0.459159	0.510608
YER127W	LCP5	0.880652	0.941245	0.978361	0.959381	1.0509	0.924355	0.924	0.459321	0.576	0.630852
YER128W	YER128W	0.954717	0.886014	0.921996	0.913042	0.859638	1.00248	0.903223	0.884859	0.99664	1.11034
YER129W	SAK1	1.12324	1.01097	1.0069	1.02905	1.0642	1.03707	1.02453	0.780924	0.847176	1.03777
YER130C	YER130C	0.890157	0.731671	0.712284	0.665905	0.824203	0.79741	0.899455	0.691922	0.809945	0.903838
YER131W	RPS26B	0.510041	0.48063	0.528737	0.5542	0.761862	0.686524	0.693866	0.830554	0.838251	1.02049
YER132C	PMD1	0.787478	0.667029	0.6111	0.703932	0.686213	0.807783	0.749297	0.946278	1.08244	1.14925
YER133W	GLC7	0.890471	0.80731	0.835062	0.860792	1.00771	0.889909	0.939841	0.919537	0.971268	1.00021
YER134C	YER134C	1.19125	1.11649	0.977742	0.98131	1.00033	1.02744	1.04971	0.729916	0.913445	1.01516
YER136W	GDI1	0.862527	0.658776	0.661897	0.681164	0.808292	0.822306	0.866132	1.48909	1.30847	1.18498
YER137C	YER137C	0.551139	0.526135	0.47746	0.485448	0.60541	0.552822	0.579859	0.79291	0.973377	1.01018
YER139C	YER139C	1.05921	1.04372	1.15027	1.20114	1.26174	1.09453	1.23134	0.534775	0.636984	0.709395
YER140W	YER140W	1.05921	1.04372	1.15027	1.20114	1.26174	1.09453	1.23134	0.795614	0.829976	1.11696
YER141W	COX15	0.804943	0.753547	0.698566	0.798514	0.905832	0.839202	0.862102	0.836968	0.914804	1.02374
YER143W	DDI1	0.978993	0.882838	0.959712	1.08342	1.08343	1.0691	1.13207	0.658547	0.764513	0.863221
YER145C	FTR1	0.730915	0.695218	0.529852	0.635354	0.537605	0.48367	0.593076	0.675709	0.700284	0.87972
YER146W	LSM5	0.807217	0.834612	0.67831	0.709676	0.779342	0.683316	0.895066	0.519856	0.702421	0.666915
YER147C	SCC4	0.872591	0.826956	0.874675	0.841911	1.16753	0.93309	0.948295	0.638179	0.974742	0.917137
YER148W	SPT15	0.872591	0.826956	0.874675	0.841911	1.16753	0.93309	0.948295	0.837606	0.798784	0.854294
YER149C	PEA2	1.2516	1.15352	1.00472	1.00679	1.09903	1.01393	1.16254	1.06771	1.0927	1.18308
YER150W	SPI1	0.713404	0.63902	0.629773	0.683525	0.8214	0.782357	0.758748	0.939583	1.02314	1.04085
YER151C	UBP3	0.966375	0.934472	0.868442	0.783118	0.915347	0.873777	0.883407	1.02181	0.94346	1.12528
YER152C	YER152C	1.07332	1.14043	0.709872	0.675243	0.807817	0.773994	0.635503	0.484693	0.629156	0.77709
YER153C	PET122	1.06253	1.06802	0.734449	0.667108	0.66661	0.767102	0.794386	0.602795	0.673205	0.784788
YER154W	OXA1	1.06253	1.06802	0.734449	0.667108	0.66661	0.767102	0.794386	0.851997	0.873101	1.07309
YER155C	BEM2	0.965018	0.774777	0.81384	0.954105	1.00204	0.98187	1.02758	0.992263	1.22479	1.19994
YER156C	YER156C	0.969182	0.828177	0.754908	0.79727	0.932872	0.911053	0.896439	0.903161	0.930829	1.00848
YER157W	COG3	1.19908	1.09652	0.926231	0.984911	0.982681	0.901422	0.955767	0.763625	0.790842	0.862279
YER158C	YER158C	0.469077	0.363055	0.376706	0.51676	0.380047	0.547751	0.422173	1.15987	1.28503	1.33993
YER161C	SPT2	0.786238	0.731733	0.723601	0.862718	0.932479	0.83124	0.912998	0.965701	0.89297	0.972343
YER162C	RAD4	0.987327	0.909502	0.903222	0.905547	0.985039	0.963681	1.03365	0.782959	0.930183	0.8026
YER163C	YER163C	1.06585	1.02172	0.855248	0.831168	0.846334	0.886229	0.91746	0.978611	0.958072	0.83749
YER164W	CHD1	0.921174	0.945681	0.984502	1.01897	1.02267	0.950577	1.04015	0.698674	0.658032	0.717385
YER165W	PAB1	0.565486	0.559284	0.58887	0.609486	0.699765	0.742716	0.71129	0.655688	0.758222	0.8236
YER166W	DNF1	0.69067	0.703773	0.75334	0.797988	0.870865	0.800307	0.836717	0.592073	0.693546	0.778447
YER167W	BCK2	0.589356	0.562281	0.590652	0.614986	0.653718	0.66104	0.637514	0.867443	0.971324	1.08547
YER168C	CCA1	0.622484	0.623498	0.569999	0.550832	0.688507	0.666344	0.705528	0.747953	0.737917	0.913903
YER169W	RPH1	0.622484	0.623498	0.569999	0.550832	0.688507	0.666344	0.705528	0.855128	0.954272	1.10008
YER170W	ADK2	0.942951	0.886183	0.891048	0.962674	0.96274	0.929445	0.877236	0.967026	1.07947	0.903126
YER171W	RAD3	0.64932	0.66197	0.697621	0.766282	0.879234	0.731944	0.799325	0.622282	0.766106	0.662517
YER172C	BRR2	0.937992	0.972791	0.930681	1.06004	1.11484	1.04665	1.0521	0.520988	0.654779	0.719523
YER173W	RAD24	0.937992	0.972791	0.930681	1.06004	1.11484	1.04665	1.0521	0.30816	0.406157	0.348044
YER177W	BMH1	0.418461	0.384408	0.397636	0.44165	0.528592	0.470329	0.601852	1.04474	1.0621	1.18338
YER179W	DMC1	0.763259	0.760256	0.926136	1.0104	1.05621	1.0206	0.969855	0.801424	0.805787	0.726698
YER180C	ISC10	0.756207	0.728134	0.692345	0.699515	0.841641	0.744855	0.783078	0.733489	0.781586	0.940286
YER180C-A	SLO1	0.753437	0.725167	0.687614	0.695402	0.838229	0.742044	0.77875	0.800754	0.93082	0.852558
YER182W	FMP10	1.06306	1.04013	0.985313	1.2024	1.31505	1.15779	1.18143	0.849028	0.859808	0.769643
YER183C	FAU1	1.04793	0.99507	0.949819	1.05166	1.17706	1.02824	1.03624	0.927786	0.890514	0.991338
YER185W	YER185W	1.09346	1.02706	0.698339	0.874068	0.916885	0.838165	0.919392	0.801582	0.831637	0.863303
YER186C	YER186C	1.06369	1.05629	0.983776	1.03603	1.05967	1.0974	1.08634	0.864985	0.933156	0.978951
YER187W	YER187W	0.835433	0.833498	0.835378	1.03858	0.898589	0.996611	1.12269	0.967449	0.952445	1.11333
YFL001W	DEG1	1.05383	1.02456	0.997022	0.932909	1.15221	0.983004	1.10105	0.961489	1.10555	1.0181
YFL002C	SPB4	1.05383	1.02456	0.997022	0.932909	1.15221	0.983004	1.10105	0.961489	1.10555	1.0181
YFL003C	MSH4	0.880648	0.787518	0.866489	0.920585	0.922646	0.934069	0.96319	0.714623	0.939737	1.06464
YFL004W	VTC2	1.1364	1.01473	0.996709	1.08974	1.29442	1.18084	1.25584	0.792156	0.938712	1.09167
YFL005W	SEC4	0.81241	0.808291	0.760205	0.864819	0.906966	0.950551	0.930897	0.671507	0.933483	0.779566
YFL007W	BLM10	0.969181	0.947511	0.937035	0.997249	0.928906	0.967158	0.964867	0.716214	0.755415	0.720644
YFL008W	SMC1	0.939134	0.921491	0.877744	0.886314	0.959201	0.895249	0.97071	0.616787	0.774641	0.838356
YFL009W	CDC4	1.01334	1.06973	0.954156	0.989957	1.04234	1.07165	1.06513	0.564046	0.772688	0.81963
YFL011W	HXT10	1.06772	0.998883	1.07845	1.15611	1.15412	1.13083	1.12739	1.00539	1.01957	0.977092
YFL012W	YFL012W	1.08374	1.08824	0.945734	0.949405	1.10253	0.991256	0.981768	0.504094	0.721358	0.664511
YFL016C	MDJ1	0.434605	0.266616	0.31471	0.356597	0.443982	0.480655	0.410039	0.748065	0.981675	1.15013
YFL017C	GNA1	0.678444	0.59798	0.605329	0.644879	0.800798	0.722807	0.714888	0.901844	0.898176	0.988851
YFL017W-A	SMX2	1.19132	0.947952	0.883846	0.963181	1.23473	1.01042	1.18231	0.948406	1.3258	1.13984
YFL018C	LPD1	0.740576	0.604478	0.605268	0.650883	0.771116	0.654767	0.800318	0.751513	0.793687	0.889735
YFL021W	GAT1	0.632893	0.500924	0.350476	0.37833	0.434702	0.462064	0.483974	1.20625	1.22215	1.07654
YFL022C	FRS2	0.47152	0.49219	0.442151	0.41477	0.537513	0.460498	0.558941	0.574346	0.796354	0.789033
YFL023W	BUD27	0.603654	0.543555	0.555715	0.500206	0.723501	0.615205	0.681633	0.925997	0.886968	1.09649
YFL024C	EPL1	0.603654	0.543555	0.555715	0.500206	0.723501	0.615205	0.681633	1.11586	1.15116	1.19421
YFL030W	AGX1	0.714778	0.701952	0.626857	0.664744	0.741613	0.720968	0.797487	0.70898	0.886477	0.959325
YFL031W	HAC1	0.545052	0.475533	0.487413	0.506591	0.638697	0.584969	0.633598	0.804163	0.866242	0.906572
YFL033C	RIM15	0.545052	0.475533	0.487413	0.506591	0.638697	0.584969	0.633598	0.836572	1.02488	1.04012
YFL034C-A	RPL22B	0.613233	0.554797	0.553631	0.61417	0.784284	0.645926	0.713032	0.979014	1.00463	1.13374
YFL034C-B	MOB2	0.652223	0.689093	0.730239	0.71244	0.944414	0.753903	0.8277	0.613534	0.656744	0.685698
YFL034W	YFL034W	0.613233	0.554797	0.553631	0.61417	0.784284	0.645926	0.713032	0.979014	1.00463	1.13374
YFL036W	RPO41	0.72769	0.718629	0.715385	0.814443	0.81176	0.773152	0.7862	0.64981	0.678952	0.958376
YFL037W	TUB2	0.767431	0.751818	0.640679	0.697944	0.812509	0.746392	0.715212	0.723412	0.788116	0.714497
YFL038C	YPT1	0.767431	0.751818	0.640679	0.697944	0.812509	0.746392	0.715212	0.791798	1.15372	1.03104
YFL039C	ACT1	0.45212	0.495596	0.514609	0.493244	0.739356	0.610578	0.701887	0.778212	0.947858	0.98284
YFL040W	YFL040W	0.500651	0.516826	0.764933	0.772703	0.784835	0.785843	0.790555	0.623702	0.652213	0.551382
YFL041W	FET5	0.987314	0.945575	0.888622	1.0175	1.08328	1.0292	1.07064	0.830478	1.02189	0.993478
YFL041W-A	YFL041W-A	1.40816	1.29771	1.19269	1.13415	1.12772	1.30301	1.22593	0.89226	0.988542	1.05045
YFL044C	OTU1	1.10066	1.06014	1.08289	1.10982	1.08224	1.12743	1.13836	1.03718	1.11045	0.96664
YFL045C	SEC53	0.882257	0.835127	0.827651	0.836659	0.932304	0.954316	0.928478	0.909193	0.888457	0.914714
YFL046W	FMP32	0.662506	0.655997	0.734101	0.810612	0.901524	0.765333	0.826074	0.82141	0.821292	0.883497
YFL047W	RGD2	0.906112	0.940955	0.843609	0.866939	0.820971	0.921881	0.89784	0.45747	0.677966	0.663356
YFL048C	EMP47	0.906112	0.940955	0.843609	0.866939	0.820971	0.921881	0.89784	0.516828	0.693914	0.622903
YFL049W	SWP82	0.780513	0.76826	0.797559	0.923436	1.02397	0.917593	0.918644	0.788854	0.805589	1.05767
YFL050C	ALR2	0.780513	0.76826	0.797559	0.923436	1.02397	0.917593	0.918644	0.74755	0.884636	0.943295
YFL051C	YFL051C	0.496746	0.509719	0.498664	0.811933	0.479437	0.800171	0.447957	0.803807	0.916368	0.711203
YFL052W	YFL052W	0.804173	0.884524	0.831742	0.828562	0.773766	0.910928	0.867298	0.764768	0.856495	0.850703
YFL053W	DAK2	0.806296	0.801013	0.79485	0.870173	0.966808	0.918415	0.875912	0.686076	0.842922	0.891826
YFL054C	YFL054C	0.807716	0.802507	0.795606	0.870687	0.968271	0.919615	0.877234	0.839804	0.907923	0.932145
YFL055W	AGP3	0.827619	0.780357	0.794244	0.785309	0.96166	1.02757	0.933024	0.973909	1.15418	1.1528
YFL056C	AAD6	0.827619	0.780357	0.794244	0.785309	0.96166	1.02757	0.933024	0.914103	0.926106	0.918732
YFL058W	THI5	0.52708	0.560501	0.476172	0.436144	0.398259	0.455824	0.379896	0.619513	0.757871	0.77847
YFL059W	SNZ3	0.162459	0.170515	0.198812	0.148829	0.184897	0.22191	0.208323	0.628408	0.761968	0.85637
YFL061W	DDI2	0.313302	0.32894	0.364536	0.427741	0.411315	0.442327	0.447293	0.423346	0.636202	0.599938
YFL062W	COS4	0.59334	0.630125	0.73401	0.740472	0.702054	0.70116	0.75686	0.662563	0.643617	0.858518
YFL064C	YFL064C	0.281382	0.269825	0.411834	0.263533	0.241055	0.238503	0.244166	0.779027	0.963003	0.962568
YFL066C	YFL066C	0.00812917	0.00861682	0.00483631	0.00437597	0.0046392	0.00475137	0.0017015	0.482428	0.622502	0.768799
YFR001W	LOC1	0.640868	0.644076	0.680066	0.724132	0.902683	0.736706	0.842909	0.822689	1.01138	0.91125
YFR002W	NIC96	0.936122	0.901031	0.823961	0.88136	0.959823	0.912653	0.920319	0.686028	0.848891	0.685273
YFR003C	YPI1	1.22752	1.04379	0.938313	0.912136	1.16914	1.13163	1.01306	0.975138	1.05644	1.16978
YFR004W	RPN11	1.22752	1.04379	0.938313	0.912136	1.16914	1.13163	1.01306	1.07579	1.10036	1.08848
YFR005C	SAD1	0.848945	0.46201	0.571915	0.725829	0.935828	0.944087	0.919909	0.582425	0.963397	0.931706
YFR006W	YFR006W	0.848945	0.46201	0.571915	0.725829	0.935828	0.944087	0.919909	0.501552	0.81934	1.00753
YFR007W	YFR007W	1.20122	1.04287	1.16796	1.08015	1.34832	1.15369	1.2991	0.983452	1.17839	1.10627
YFR008W	FAR7	1.34647	1.10849	1.06146	1.10674	1.16764	1.21504	1.11674	0.87966	0.956598	1.11851
YFR009W	GCN20	0.725207	0.636847	0.653066	0.637262	0.780591	0.682484	0.693337	1.0075	1.01081	1.36522
YFR010W	UBP6	0.83867	0.738807	0.780619	0.90372	0.942118	0.832139	0.948802	0.838436	0.962357	1.05553
YFR011C	YFR011C	0.56526	0.50296	0.506667	0.549825	0.68534	0.587021	0.633977	0.825703	0.957743	1.02068
YFR012W	YFR012W	0.571319	0.509166	0.512069	0.555714	0.691796	0.592259	0.639173	0.938189	0.975748	1.23231
YFR013W	IOC3	1.25351	1.15713	1.18628	1.12834	1.22366	1.14612	1.14884	0.845508	0.963704	1.20669
YFR014C	CMK1	0.805885	0.741443	0.750954	0.741852	0.943688	0.895627	0.873702	0.758495	0.766765	0.887081
YFR016C	YFR016C	0.701002	0.640984	0.63053	0.709462	0.812324	0.836088	0.831311	0.966578	1.10612	1.06714
YFR017C	YFR017C	0.591056	0.511812	0.456376	0.377076	0.491375	0.431945	0.472048	1.05835	1.06441	0.957745
YFR018C	YFR018C	1.20416	1.08125	0.818748	0.889555	1.03188	0.905498	1.0197	0.612623	0.596124	0.802694
YFR019W	FAB1	1.20416	1.08125	0.818748	0.889555	1.03188	0.905498	1.0197	0.618048	1.05577	0.827799
YFR021W	ATG18	0.875101	0.764395	0.788609	0.842253	0.884951	0.904553	0.84672	0.897695	1.04704	1.07379
YFR022W	ROG3	0.899064	0.661944	0.559218	0.810424	0.81727	0.840609	0.81629	1.01885	0.938967	0.933365
YFR023W	PES4	0.787519	0.783922	0.848046	0.948012	0.976352	0.837531	0.931881	0.768559	0.833488	0.872247
YFR024C-A	LSB3	0.866276	0.797972	0.776386	0.857951	1.06336	0.869614	0.94073	0.6371	0.937725	1.00269
YFR026C	YFR026C	1.21763	1.24816	1.11792	1.15315	1.20694	1.2711	1.19847	0.550438	0.760801	0.753127
YFR027W	ECO1	1.21763	1.24816	1.11792	1.15315	1.20694	1.2711	1.19847	0.74553	0.885912	0.80934
YFR028C	CDC14	0.715252	0.686921	0.555225	0.592902	0.740266	0.693371	0.737397	1.0282	1.02075	1.01393
YFR029W	PTR3	0.591193	0.551556	0.525578	0.529179	0.614891	0.537604	0.587294	0.778982	0.831894	0.910442
YFR031C	SMC2	0.997455	0.962838	0.895921	0.867416	0.925575	1.0227	0.967514	1.01558	1.06535	1.16027
YFR031C-A	RPL2A	0.491722	0.477552	0.46113	0.397625	0.441596	0.466463	0.523939	1.12609	1.20287	1.12274
YFR032C	YFR032C	0.652167	0.645729	0.703968	0.713366	0.768595	0.694148	0.75765	0.82141	0.821292	0.883497
YFR032C-A	RPL29	0.300081	0.261133	0.390366	0.377233	0.570203	0.503274	0.525362	0.787711	1.11278	1.07405
YFR032C-B	YFR032C-B	0.294295	0.256331	0.385937	0.371565	0.563763	0.495796	0.518559	0.925647	1.03306	0.873746
YFR033C	QCR6	0.46387	0.432611	0.322194	0.28635	0.470919	0.391647	0.450646	0.913061	0.915696	1.10853
YFR034C	PHO4	1.01107	1.04141	0.765918	0.64003	0.806728	0.737978	0.864857	0.62941	0.799371	0.900774
YFR035C	YFR035C	0.76821	0.778024	0.559949	0.544948	0.686156	0.688914	0.721796	0.689235	0.826601	0.919686
YFR036W	CDC26	0.76821	0.778024	0.559949	0.544948	0.686156	0.688914	0.721796	0.74446	0.867663	0.919782
YFR037C	RSC8	1.16079	1.15052	0.966505	0.928371	1.17409	1.07157	1.00596	0.92013	1.01228	1.15643
YFR038W	IRC5	1.16079	1.15052	0.966505	0.928371	1.17409	1.07157	1.00596	0.92013	1.01228	1.15643
YFR039C	YFR039C	0.678792	0.664418	0.582861	0.635943	0.761814	0.652711	0.70783	0.815507	1.0244	0.99979
YFR040W	SAP155	0.678792	0.664418	0.582861	0.635943	0.761814	0.652711	0.70783	0.780823	0.87733	0.916254
YFR041C	ERJ5	1.025	0.963532	0.936826	1.05645	1.12635	1.0503	1.07746	0.91006	0.903542	0.864652
YFR042W	YFR042W	1.025	0.963532	0.936826	1.05645	1.12635	1.0503	1.07746	0.981389	1.00795	1.03418
YFR047C	BNA6	1.24387	1.19903	1.01586	1.03154	1.11211	1.12976	1.14319	0.711739	0.862916	0.856296
YFR048W	RMD8	0.926096	0.96566	0.913082	0.944119	1.06969	0.920162	0.945776	0.425635	0.476095	0.567
YFR049W	YMR31	0.772957	0.738273	0.831036	0.869728	0.988658	0.907892	0.917072	0.745068	0.802269	0.954342
YFR050C	PRE4	0.76685	0.772069	0.775883	0.768782	0.921997	0.842462	0.778071	0.700234	0.685625	0.79299
YFR051C	RET2	0.994192	0.98352	0.73458	0.893168	0.906548	0.910972	0.868884	0.838994	0.908896	0.866786
YFR052W	RPN12	1.07925	1.05162	0.940546	0.898604	0.978519	0.95905	0.99167	0.857568	0.872397	0.915219
YFR053C	HXK1	0.655125	0.563639	0.633575	0.791825	0.836736	0.792005	0.709185	1.09415	1.16341	1.17149
YGL001C	ERG26	0.587511	0.509092	0.517796	0.608842	0.748737	0.627661	0.702923	0.864582	0.957608	1.08794
YGL002W	ERP6	1.14781	1.07857	0.972423	1.06471	1.02707	0.91668	1.03772	0.94983	1.00355	0.942869
YGL003C	CDH1	1.14781	1.07857	0.972423	1.06471	1.02707	0.91668	1.03772	0.437907	0.47834	0.812348
YGL004C	RPN14	0.861177	0.834762	0.85326	1.01189	1.03636	1.02602	0.999331	0.848894	0.996626	1.04723
YGL005C	COG7	1.10376	1.03059	0.980643	0.977144	1.13568	1.06546	1.14918	0.923691	0.821935	1.04684
YGL006W	PMC1	0.629157	0.555696	0.557553	0.650111	0.782421	0.695118	0.730716	1.18077	1.16733	1.14997
YGL009C	LEU1	0.840377	0.801409	0.720945	0.728432	0.850762	0.615013	0.859183	0.848924	0.978562	0.935423
YGL010W	YGL010W	1.00258	0.854066	0.897808	0.901478	1.06803	0.885194	1.01214	1.06364	1.10582	1.15524
YGL011C	SCL1	1.00258	0.854066	0.897808	0.901478	1.06803	0.885194	1.01214	0.895682	1.10582	0.882999
YGL012W	ERG4	0.830748	0.810762	0.71419	0.646767	0.845332	0.833989	0.875133	0.799306	0.989305	0.875054
YGL013C	PDR1	0.830748	0.810762	0.71419	0.646767	0.845332	0.833989	0.875133	0.840319	1.04475	0.751943
YGL014W	PUF4	0.689514	0.655749	0.728284	0.799661	0.814242	0.717504	0.814462	0.877589	1.02134	0.964176
YGL015C	YGL015C	0.689514	0.655749	0.728284	0.799661	0.814242	0.717504	0.814462	0.877589	1.02134	0.964176
YGL016W	KAP122	0.934377	0.896366	0.911182	0.999903	1.02859	1.04296	0.988757	0.881705	0.914521	1.12013
YGL017W	ATE1	1.19547	1.14228	1.00689	1.0293	1.06654	1.04507	1.03168	0.848117	0.929973	0.963524
YGL018C	JAC1	1.19547	1.14228	1.00689	1.0293	1.06654	1.04507	1.03168	1.10923	1.19313	1.1361
YGL019W	CKB1	1.14466	1.11289	1.03532	1.05626	1.15173	1.20277	1.20701	0.898009	0.959909	1.0271
YGL020C	GET1	1.14466	1.11289	1.03532	1.05626	1.15173	1.20277	1.20701	0.898009	0.959909	1.0271
YGL021W	ALK1	0.617719	0.675634	0.793063	0.825325	0.827199	0.747532	0.803458	0.500828	0.694519	0.559893
YGL022W	STT3	1.49164	1.33143	0.926731	0.874302	0.822279	0.906545	0.918774	1.04991	1.14787	0.923945
YGL023C	PIB2	1.49164	1.33143	0.926731	0.874302	0.822279	0.906545	0.918774	1.04991	1.14787	0.923945
YGL027C	CWH41	0.954415	0.830503	0.845428	0.897648	0.980672	0.906648	0.888253	1.17195	1.12465	1.2417
YGL028C	SCW11	0.739969	0.687841	0.653599	0.71917	0.786848	0.856567	0.835699	0.908841	0.949388	1.05217
YGL029W	CGR1	0.780492	0.709232	0.849173	0.964958	1.2395	0.966328	1.03766	0.895469	1.00718	1.06566
YGL030W	RPL30	0.408742	0.376195	0.43971	0.456277	0.624477	0.531876	0.608927	0.955048	1.03743	1.07275
YGL035C	MIG1	0.660099	0.708487	0.681722	0.663243	0.773012	0.7851	0.763338	0.443887	0.606943	0.567548
YGL036W	YGL036W	0.443922	0.422552	0.407568	0.379572	0.521185	0.462554	0.50243	0.797105	0.907242	0.897489
YGL039W	YGL039W	0.508387	0.493871	0.488216	0.511287	0.645719	0.548825	0.636741	0.803681	0.966496	1.11211
YGL040C	HEM2	0.93329	0.882632	0.784022	0.768284	0.916862	0.87056	0.938864	0.805676	0.871172	0.998538
YGL041C-B	YGL041C-B	1.37412	1.40517	1.34162	1.15312	1.17374	1.1944	1.18848	0.535561	0.637098	0.644588
YGL043W	DST1	0.938543	0.85435	0.81882	0.945203	0.977772	0.967382	0.98121	0.848699	0.980719	0.981552
YGL044C	RNA15	0.938543	0.85435	0.81882	0.945203	0.977772	0.967382	0.98121	0.733995	0.921601	0.835171
YGL047W	ALG13	0.999675	0.848514	0.860926	0.924943	1.03767	0.930272	1.10709	0.860889	0.985879	1.17599
YGL048C	RPT6	0.999675	0.848514	0.860926	0.924943	1.03767	0.930272	1.10709	0.99009	1.10287	1.08319
YGL049C	TIF4632	0.890535	0.824264	0.831447	0.780984	0.939272	0.954415	0.977582	1.07857	1.0395	1.05844
YGL051W	MST27	0.825304	0.791281	0.767694	0.759413	0.779927	0.748644	0.783557	0.817336	0.966861	0.832547
YGL054C	ERV14	0.518388	0.471877	0.501869	0.563873	0.622683	0.573765	0.663452	0.776552	0.9234	1.07506
YGL055W	OLE1	0.421288	0.396118	0.305142	0.2868	0.435351	0.330409	0.422299	0.704622	0.689154	0.79381
YGL056C	SDS23	0.568327	0.578868	0.415592	0.38415	0.559188	0.435819	0.542706	0.805299	0.887169	0.819809
YGL057C	YGL057C	0.795851	0.676704	0.746527	0.782651	0.889709	0.812875	0.806263	0.898587	0.923916	1.11725
YGL061C	DUO1	1.09443	1.03001	1.07628	1.11851	1.23775	1.11786	1.24601	0.955429	1.01975	0.917921
YGL063W	PUS2	0.919745	0.908831	0.911866	0.990089	1.08335	1.06188	1.08505	0.698021	0.854857	0.960444
YGL064C	MRH4	0.919745	0.908831	0.911866	0.990089	1.08335	1.06188	1.08505	0.888593	0.849461	0.985915
YGL065C	ALG2	0.928827	0.817145	0.862634	0.87642	1.01652	0.960168	0.944723	0.653932	0.924119	0.965361
YGL066W	SGF73	0.851245	0.762173	0.891861	0.875178	1.01442	0.897653	0.978288	0.975642	0.976114	1.09313
YGL067W	NPY1	0.960705	0.864358	0.978832	1.09573	1.03551	1.11129	1.0544	0.93166	1.00135	1.00332
YGL068W	MNP1	1.15247	1.09467	0.912603	0.956518	1.14143	1.08537	1.05565	0.731973	0.70244	0.79387
YGL070C	RPB9	1.15247	1.09467	0.912603	0.956518	1.14143	1.08537	1.05565	0.679793	0.792679	0.945005
YGL071W	AFT1	0.830255	0.734971	0.558007	0.60195	0.64755	0.638213	0.732716	1.11759	1.09385	1.08108
YGL073W	HSF1	1.18093	1.03842	0.813804	0.838053	1.08956	0.995046	1.02848	0.979647	1.09667	1.0729
YGL075C	MPS2	1.27053	1.14243	0.918248	0.974277	1.16742	1.13845	1.12372	0.843662	0.89807	0.900415
YGL076C	RPL7A	0.62519	0.64952	0.675789	0.725614	0.846172	0.724404	0.842612	0.791587	0.857845	0.846117
YGL077C	HNM1	0.549659	0.547179	0.594845	0.606886	0.749879	0.656332	0.725832	0.848719	0.923716	0.877771
YGL078C	DBP3	0.531913	0.574325	0.679492	0.838078	0.861051	0.881199	0.871009	0.540155	0.605453	0.889558
YGL079W	YGL079W	0.823722	0.825432	0.851913	0.983066	0.955621	0.941738	0.8989	0.716693	0.791335	0.886861
YGL080W	FMP37	0.944564	0.834055	0.760582	0.808453	0.865332	0.89063	0.922875	0.964153	1.01497	1.20036
YGL081W	YGL081W	0.676833	0.698773	0.807344	0.873854	1.13026	0.880621	0.978559	0.784907	0.795767	0.81431
YGL082W	YGL082W	0.933177	0.780289	0.746212	0.785605	0.981694	0.945319	0.925539	0.929285	1.06525	1.2308
YGL083W	SCY1	0.855753	0.861091	0.84048	0.786864	0.94682	0.880904	0.884509	0.769338	0.882378	0.782727
YGL084C	GUP1	1.05017	1.05587	0.944762	0.920517	0.963937	1.07512	1.01426	0.783259	0.844155	0.76607
YGL085W	YGL085W	0.663737	0.60145	0.718392	0.870663	0.837237	0.863546	0.806409	0.755201	0.943436	0.83651
YGL086W	MAD1	0.951627	0.906521	0.888217	1.00765	1.15244	1.16488	1.09336	0.827705	1.01878	1.00007
YGL087C	MMS2	0.951627	0.906521	0.888217	1.00765	1.15244	1.16488	1.09336	0.867443	0.971324	1.08547
YGL089C	MF(ALPHA)2	0.782805	0.765458	0.735415	0.728881	0.743154	0.813306	0.855348	0.837867	0.926166	0.862941
YGL090W	LIF1	1.12373	1.08051	0.991593	1.10484	1.1007	1.12184	1.16694	0.740527	0.794519	0.935158
YGL091C	NBP35	1.12373	1.08051	0.991593	1.10484	1.1007	1.12184	1.16694	0.723204	0.715353	0.788529
YGL092W	NUP145	0.810893	0.847913	0.835772	0.862191	0.84971	0.844546	0.945086	0.702632	0.831439	0.735329
YGL093W	SPC105	0.891879	0.88092	0.93745	1.01069	1.06993	1.03024	1.05185	0.687479	0.985997	0.827227
YGL094C	PAN2	0.891879	0.88092	0.93745	1.01069	1.06993	1.03024	1.05185	0.698976	0.938288	0.939982
YGL095C	VPS45	0.88823	0.816891	0.832356	0.892803	0.869865	0.921944	0.830783	0.657541	0.69546	1.01312
YGL096W	TOS8	0.536353	0.412727	0.61905	0.820579	0.765113	0.868065	0.769667	1.12575	0.976623	0.947413
YGL097W	SRM1	0.698106	0.708141	0.750737	0.752583	0.773576	0.812246	0.825368	0.748528	0.653125	0.774729
YGL098W	USE1	0.630559	0.554019	0.597546	0.704463	0.734999	0.671861	0.793621	1.13868	1.36017	1.08763
YGL099W	LSG1	0.709228	0.784764	0.853859	0.787473	0.945704	0.880344	0.904929	0.388573	0.613516	0.563035
YGL100W	SEH1	0.949759	0.967037	1.00013	1.04439	1.07261	1.03616	1.20421	0.775573	0.954815	1.03592
YGL103W	RPL28	0.53256	0.520078	0.576784	0.609904	0.656021	0.671877	0.773772	0.947878	1.15825	1.15302
YGL105W	ARC1	0.776876	0.750049	0.661719	0.650249	0.867881	0.672146	0.743776	0.808686	0.84979	0.88204
YGL106W	MLC1	1.16976	1.05834	0.894542	0.920427	1.04515	0.968899	1.02141	0.818074	0.939471	0.878775
YGL107C	RMD9	1.16976	1.05834	0.894542	0.920427	1.04515	0.968899	1.02141	0.833467	0.933024	0.966275
YGL108C	YGL108C	0.918921	0.805383	0.867075	0.941886	1.02457	1.00261	1.12543	1.1008	1.10485	1.09641
YGL110C	CUE3	0.924627	0.795142	0.799218	0.921893	0.969566	0.934686	0.966355	1.14466	1.1459	1.52769
YGL111W	NSA1	1.14516	1.14544	1.00647	1.01142	1.06816	1.05643	1.14305	0.643912	0.753807	0.747495
YGL112C	TAF6	1.14516	1.14544	1.00647	1.01142	1.06816	1.05643	1.14305	0.83353	0.838009	0.976844
YGL113W	SLD3	0.798331	0.758189	0.784479	0.823342	0.861987	0.791431	0.93494	0.76516	0.892137	0.894711
YGL115W	SNF4	0.846096	0.841007	0.858732	0.867981	0.986749	0.909482	0.903953	0.678586	0.80237	0.738982
YGL116W	CDC20	0.735881	0.558757	0.671946	0.87273	0.833779	0.716119	0.89524	0.916694	1.07437	1.03876
YGL119W	ABC1	0.968648	0.894313	0.958357	0.939844	1.04003	0.990919	0.981275	0.913343	0.921588	1.14334
YGL120C	PRP43	0.8166	0.802589	0.770888	0.796941	0.965079	0.837783	0.918219	0.884602	0.999718	1.04297
YGL121C	GPG1	0.804962	0.639476	0.779575	0.827972	0.854707	0.916435	0.819656	0.801058	1.00826	1.06561
YGL122C	NAB2	0.951482	0.872387	0.840332	0.796178	0.894271	0.750896	0.841925	1.04815	1.01627	1.19699
YGL123W	RPS2	0.612456	0.501702	0.536752	0.547321	0.640412	0.684535	0.732405	1.09804	1.03024	0.920911
YGL126W	SCS3	1.22416	1.17765	0.86075	0.802981	0.980558	0.913026	1.00608	0.85613	0.910695	0.923401
YGL127C	SOH1	1.22416	1.17765	0.86075	0.802981	0.980558	0.913026	1.00608	0.797425	0.781687	0.950554
YGL128C	CWC23	1.05846	1.0077	0.877726	0.970495	1.02793	0.972014	1.07723	0.829898	0.967797	1.10358
YGL129C	RSM23	1.1196	0.985363	0.886349	0.935013	1.013	0.977878	1.01633	1.13868	1.36017	1.08763
YGL130W	CEG1	1.07045	1.05356	1.01655	1.06999	1.13131	1.12678	1.10059	0.914298	1.01527	1.05377
YGL131C	SNT2	1.07045	1.05356	1.01655	1.06999	1.13131	1.12678	1.10059	0.726074	0.965782	1.06358
YGL133W	ITC1	0.532914	0.522155	0.660165	0.764777	0.784146	0.729022	0.72793	0.744286	0.743239	0.839806
YGL134W	PCL10	0.714054	0.614476	0.738278	0.797741	0.829322	0.839228	0.957452	0.746216	0.934934	1.04417
YGL135W	RPL1B	0.557822	0.538956	0.614329	0.61433	0.736162	0.708067	0.730164	0.882371	0.934149	0.956335
YGL136C	MRM2	1.0605	1.03302	1.08059	1.1258	1.31037	1.25985	1.28642	0.803548	0.891586	0.924723
YGL137W	SEC27	0.678482	0.663058	0.702955	0.767838	0.837657	0.754775	0.773517	0.796804	0.906019	0.731511
YGL138C	YGL138C	0.678482	0.663058	0.702955	0.767838	0.837657	0.754775	0.773517	0.788234	0.920202	0.895488
YGL139W	FLC3	1.07438	1.02626	0.859744	0.913368	1.01581	1.03565	0.937618	0.775296	0.832937	0.821004
YGL140C	YGL140C	1.07438	1.02626	0.859744	0.913368	1.01581	1.03565	0.937618	0.881212	1.01963	1.11338
YGL141W	HUL5	1.13014	1.03999	0.96431	1.12079	1.17111	1.28702	1.13718	0.835487	0.779938	0.95495
YGL142C	GPI10	1.13014	1.03999	0.96431	1.12079	1.17111	1.28702	1.13718	0.728644	0.85146	0.791354
YGL143C	MRF1	1.08431	1.03873	0.975163	1.01314	1.09547	1.11796	1.1341	0.663211	0.768148	0.786385
YGL144C	ROG1	1.05147	1.11093	0.855352	0.947529	0.937521	0.964351	0.961091	0.613534	0.656744	0.685698
YGL145W	TIP20	0.651111	0.647378	0.616088	0.638759	0.877978	0.689278	0.767593	0.795466	1.00166	0.895882
YGL146C	YGL146C	0.651111	0.647378	0.616088	0.638759	0.877978	0.689278	0.767593	0.725645	0.841459	0.85932
YGL147C	RPL9A	0.50631	0.539018	0.558218	0.55715	0.611912	0.658705	0.675787	0.473559	0.756363	0.736188
YGL150C	INO80	1.22476	1.00333	0.762226	0.882444	0.990824	0.930989	0.987093	0.82729	0.817894	1.09807
YGL151W	NUT1	0.935555	0.880175	0.803938	0.855211	0.903332	0.896044	0.862288	0.930063	0.983577	0.873318
YGL155W	CDC43	0.69812	0.736704	0.731227	0.752735	0.990686	0.812502	0.840681	1.09785	1.24993	1.21257
YGL156W	AMS1	0.719879	0.607382	0.751049	0.807537	0.899595	0.829752	0.895985	0.738768	0.834752	0.896702
YGL157W	YGL157W	0.770997	0.726545	0.679611	0.721592	0.824612	0.767642	0.740355	0.845295	0.973678	0.894309
YGL158W	RCK1	0.971402	0.923735	1.02054	0.943028	1.0097	0.932063	1.07491	0.857196	1.02235	0.980638
YGL159W	YGL159W	0.948607	0.880774	0.921961	1.04076	1.08487	1.04361	1.043	0.719753	0.87218	1.07441
YGL160W	YGL160W	1.1466	0.992051	0.878339	0.858454	0.945623	0.971635	0.905973	0.789278	1.05129	1.00062
YGL161C	YIP5	1.1466	0.992051	0.878339	0.858454	0.945623	0.971635	0.905973	0.58014	0.983949	0.85981
YGL163C	RAD54	0.96495	0.917381	0.82909	0.898838	0.89133	0.923063	0.920124	1.01069	0.903612	0.863852
YGL164C	YRB30	0.845121	0.855744	0.87789	0.955913	0.996051	0.979869	0.870753	0.571491	0.72151	0.608524
YGL166W	CUP2	1.02271	0.914933	0.617997	0.65338	0.828245	0.867163	0.857867	0.966206	0.964455	0.795741
YGL167C	PMR1	1.02271	0.914933	0.617997	0.65338	0.828245	0.867163	0.857867	0.966206	0.964455	0.795741
YGL168W	HUR1	0.775929	0.723819	0.810747	0.899806	0.919432	0.874283	0.910381	0.818322	0.973911	0.935228
YGL169W	SUA5	0.542637	0.531036	0.596727	0.632347	0.67661	0.697785	0.664659	0.73844	0.909791	1.07261
YGL170C	SPO74	0.542637	0.531036	0.596727	0.632347	0.67661	0.697785	0.664659	0.725655	0.936702	0.839249
YGL171W	ROK1	0.941887	0.908908	0.980942	0.931412	1.04099	1.01159	0.957	0.813017	0.996908	0.826189
YGL172W	NUP49	0.944226	0.842255	0.784634	0.77978	0.749687	0.81528	0.812426	0.988119	1.1928	1.02937
YGL173C	KEM1	0.944226	0.842255	0.784634	0.77978	0.749687	0.81528	0.812426	0.858599	1.14583	1.00276
YGL174W	BUD13	1.12547	1.21442	1.06502	1.01978	1.10097	1.24733	1.18886	0.510716	0.582252	0.632663
YGL175C	SAE2	1.12547	1.21442	1.06502	1.01978	1.10097	1.24733	1.18886	0.476345	0.676672	0.757978
YGL176C	YGL176C	0.767649	0.79657	0.865999	0.903844	0.980191	0.928923	1.12138	0.697341	0.710971	0.765668
YGL178W	MPT5	0.801493	0.689749	0.64931	0.658861	0.819798	0.740033	0.762494	1.12423	1.19041	1.16315
YGL179C	TOS3	0.984105	0.906847	0.8129	0.79725	1.14922	0.984969	1.0817	0.899747	1.02783	0.979217
YGL187C	COX4	0.670482	0.567238	0.63303	0.670559	0.945498	0.708958	0.833384	0.958778	1.07094	1.0363
YGL189C	RPS26A	0.335881	0.343518	0.433148	0.420681	0.518837	0.519473	0.556847	0.535561	0.637098	0.644588
YGL190C	CDC55	0.569309	0.481091	0.53607	0.570812	0.783484	0.662548	0.706458	0.957387	0.992677	1.07706
YGL191W	COX13	0.932828	0.826748	0.801238	0.77529	1.0161	0.891515	1.0446	0.888424	0.992315	0.82609
YGL192W	IME4	0.923286	0.942797	0.879277	0.917511	1.07772	0.971602	1.01189	0.416902	0.593215	0.597533
YGL194C	HOS2	0.923286	0.942797	0.879277	0.917511	1.07772	0.971602	1.01189	0.909475	1.17622	1.17628
YGL194C-A	YGL194C-A	0.650902	0.491422	0.565971	0.666882	0.690333	0.769804	0.653898	1.09515	1.1168	1.02795
YGL195W	GCN1	0.874191	0.90173	0.837841	0.919724	0.967475	0.865051	0.849573	0.658092	0.720667	0.827293
YGL196W	YGL196W	0.88657	0.804174	0.830551	0.90438	0.859495	1.02636	0.958308	0.774978	0.923663	0.910389
YGL197W	MDS3	0.876762	0.767679	0.57735	0.550147	0.764396	0.69707	0.667441	1.10388	1.04736	1.07497
YGL198W	YIP4	0.999026	0.99968	0.700773	0.70603	0.82426	0.742302	0.764644	0.520161	0.788681	0.762577
YGL200C	EMP24	0.999026	0.99968	0.700773	0.70603	0.82426	0.742302	0.764644	0.824292	0.927481	0.805268
YGL201C	MCM6	0.972483	1.05766	0.90141	0.985714	1.08213	1.06359	0.994611	0.379037	0.672411	0.585163
YGL203C	KEX1	0.948922	0.917858	0.829939	0.790083	1.08215	0.872254	0.923288	0.852696	1.00507	1.10319
YGL205W	POX1	0.587948	0.575801	0.583839	0.610657	0.777769	0.572087	0.638349	0.811679	0.950107	0.818914
YGL206C	CHC1	0.587948	0.575801	0.583839	0.610657	0.777769	0.572087	0.638349	0.644459	0.727215	0.713305
YGL207W	SPT16	0.85922	0.816119	0.818577	0.777303	0.782309	0.926718	0.88428	0.931137	1.04482	0.922271
YGL209W	MIG2	0.560879	0.551527	0.546198	0.526798	0.590452	0.5795	0.609068	0.835244	0.846563	0.889268
YGL210W	YPT32	0.950814	0.964808	0.755898	0.745255	0.922592	0.866519	0.834463	0.889527	0.947489	0.921247
YGL211W	NCS6	1.01126	0.939501	0.816587	0.800744	0.884828	0.861741	0.843118	0.847056	0.982723	0.853677
YGL212W	VAM7	1.01475	1.04599	1.04706	1.05479	1.03115	1.01111	1.07563	0.611475	0.791834	0.859138
YGL213C	SKI8	1.01475	1.04599	1.04706	1.05479	1.03115	1.01111	1.07563	0.640928	0.662451	0.625778
YGL215W	CLG1	0.741886	0.718409	0.689448	0.705425	0.767587	0.725147	0.701786	0.623362	0.957654	1.01948
YGL216W	KIP3	0.646382	0.619944	0.596321	0.653754	0.714362	0.631766	0.668633	0.852224	0.995506	1.1153
YGL220W	YGL220W	1.20404	1.12037	0.985201	0.98646	0.980241	1.07574	1.08012	0.796941	0.817265	0.990709
YGL221C	NIF3	1.20404	1.12037	0.985201	0.98646	0.980241	1.07574	1.08012	0.933893	1.00362	1.07805
YGL222C	EDC1	1.04735	0.909045	0.772584	0.793239	0.875615	0.836025	0.848361	0.944888	0.988814	1.05298
YGL225W	VRG4	0.64179	0.657708	0.524247	0.590352	0.616283	0.574938	0.594823	0.605276	0.75309	0.701426
YGL226C-A	OST5	1.31335	1.21571	1.0157	1.00265	1.09424	1.12664	1.12464	0.951135	1.10353	0.951481
YGL226W	YGL226W	1.31335	1.21571	1.0157	1.00265	1.09424	1.12664	1.12464	0.951135	1.10353	0.951481
YGL227W	VID30	0.938878	0.897099	0.808195	0.828274	0.822072	0.897904	0.794224	0.8857	1.05808	1.10017
YGL228W	SHE10	0.9443	0.8885	0.697632	0.692315	0.822925	0.797147	0.814194	0.918662	1.0422	1.17556
YGL230C	YGL230C	0.724093	0.65472	0.758907	0.807005	0.912648	0.874197	0.900055	0.840026	0.931472	0.977641
YGL231C	YGL231C	0.994873	0.911437	0.936264	0.969174	1.10725	0.951001	0.9817	0.869442	0.99872	0.968457
YGL232W	TAN1	0.825818	0.741266	0.814259	0.888903	0.888416	0.915454	0.849788	0.706363	0.83134	1.03577
YGL233W	SEC15	0.890063	0.895398	0.920107	0.864728	0.90899	0.904526	0.847355	0.617883	0.775485	0.764432
YGL234W	ADE5,7	0.843673	0.772302	0.666691	0.611183	0.654704	0.609959	0.759228	0.773143	0.774922	0.909695
YGL236C	MTO1	0.843673	0.772302	0.666691	0.611183	0.654704	0.609959	0.759228	0.725783	0.653015	0.854389
YGL237C	HAP2	1.0792	1.00286	0.903125	0.877646	0.850849	0.870774	1.01622	0.884388	0.904498	0.995272
YGL238W	CSE1	0.819915	0.856007	0.694723	0.778217	0.77414	0.846068	0.830004	0.597664	0.846146	0.773385
YGL240W	DOC1	0.919558	0.886866	0.840445	0.815937	0.927139	0.916525	0.928951	0.898373	0.849813	0.938441
YGL241W	KAP114	0.905568	0.859468	0.87051	0.895322	1.00187	0.946127	0.910612	0.562781	0.769932	0.821032
YGL242C	YGL242C	0.905568	0.859468	0.87051	0.895322	1.00187	0.946127	0.910612	1.03036	0.961963	0.981276
YGL243W	TAD1	0.739112	0.72159	0.701884	0.702929	0.69347	0.720541	0.717035	0.894422	1.08843	1.1803
YGL244W	RTF1	0.801364	0.80465	0.845531	0.826308	1.01693	0.884329	0.945383	0.854362	0.906778	0.856476
YGL245W	GUS1	1.0631	1.07599	0.985071	1.02657	1.06537	1.06629	0.990234	0.742029	1.12339	1.02441
YGL246C	RAI1	1.0631	1.07599	0.985071	1.02657	1.06537	1.06629	0.990234	0.710806	0.725571	0.878441
YGL247W	BRR6	1.06628	0.952171	1.01012	0.998806	1.12993	1.04067	1.01942	0.991916	0.940442	1.06368
YGL249W	ZIP2	0.761726	0.666349	0.886247	0.93394	0.995703	0.88885	1.04706	0.863744	0.991835	1.18655
YGL250W	YGL250W	0.891383	0.892427	0.890159	0.869162	1.01485	1.02483	1.0795	0.948049	0.961614	0.953744
YGL251C	HFM1	0.905468	0.803452	0.871138	0.999629	1.0725	0.975367	0.943256	1.15748	1.17147	1.3461
YGL252C	RTG2	0.933017	0.878468	0.753647	0.810923	0.928532	0.781794	0.845072	0.680451	0.739138	0.668034
YGL253W	HXK2	0.370388	0.43152	0.441581	0.50169	0.515793	0.568579	0.558437	0.437314	0.505729	0.525864
YGL254W	FZF1	0.890019	0.921395	0.926018	0.937195	0.933015	0.947368	0.904601	0.568698	0.67203	0.732438
YGL255W	ZRT1	0.48609	0.484971	0.859067	0.783915	0.464489	0.866309	0.521859	0.967449	0.952445	1.11333
YGL256W	ADH4	1.12049	0.923562	0.960553	0.945339	0.992462	0.999239	1.00133	0.763527	1.04861	1.04055
YGL257C	MNT2	1.12049	0.923562	0.960553	0.945339	0.992462	0.999239	1.00133	0.819606	0.927248	0.95961
YGL258W	VEL1	0.845934	0.804972	0.778082	0.768851	0.844229	0.760139	0.823918	1.03307	1.06406	1.08155
YGL259W	YPS5	0.423002	0.39073	0.371862	0.411317	0.379794	0.368306	0.365806	1.09939	1.04012	1.10706
YGL260W	YGL260W	0.661696	0.677184	0.813935	0.665139	0.732313	0.760825	0.746726	0.753719	0.818272	0.916282
YGL261C	PAU11	0.729682	0.723319	0.688611	0.708917	0.726964	0.73114	0.656306	0.765597	0.946085	0.956507
YGR001C	YGR001C	0.796637	0.761343	0.85006	0.972751	1.0069	0.944965	1.0399	0.769106	0.865733	1.03285
YGR002C	SWC4	0.978476	0.930966	0.934175	1.06412	1.09853	1.04658	0.947793	0.835688	1.05644	0.906571
YGR003W	CUL3	0.978476	0.930966	0.934175	1.06412	1.09853	1.04658	0.947793	0.835688	1.05644	0.906571
YGR004W	PEX31	0.769403	0.738638	0.778172	0.862696	1.03273	0.960974	0.910212	0.720557	0.817483	0.901168
YGR005C	TFG2	1.35045	1.22901	1.16088	1.27622	1.35397	1.3102	1.22244	0.660294	0.816648	0.845386
YGR006W	PRP18	1.35045	1.22901	1.16088	1.27622	1.35397	1.3102	1.22244	1.00436	0.948703	1.04788
YGR007W	MUQ1	1.27934	1.17653	0.974851	0.939011	1.05443	1.09543	1.12699	1.00403	1.12196	1.04998
YGR009C	SEC9	1.00316	0.942807	0.917307	0.956582	1.1032	1.03247	1.09782	0.870347	0.815216	0.903412
YGR010W	NMA2	1.00896	0.947797	0.919522	0.95961	1.10552	1.03761	1.10093	0.726689	0.848021	0.805893
YGR012W	YGR012W	0.893048	0.833537	0.91996	0.954951	0.932429	0.929346	0.950094	0.707787	0.892976	0.906864
YGR013W	SNU71	1.03539	0.941798	0.981803	1.00787	1.03323	0.975256	1.01189	1.19653	1.10482	1.1087
YGR014W	MSB2	0.584098	0.549822	0.530645	0.584993	0.609686	0.634356	0.642926	1.04841	1.05549	1.02188
YGR015C	YGR015C	1.02486	0.87803	0.890728	0.999839	1.15652	1.08959	1.08619	1.07525	1.23127	1.14061
YGR016W	YGR016W	1.02486	0.87803	0.890728	0.999839	1.15652	1.08959	1.08619	1.07525	1.23127	1.14061
YGR017W	YGR017W	0.929958	0.778965	0.760767	0.813931	0.957255	0.890956	0.898844	0.931078	0.950949	1.31487
YGR020C	VMA7	1.06437	1.01343	0.848128	0.841539	1.05191	1.0135	1.05971	0.944979	0.94499	0.939503
YGR021W	YGR021W	1.06437	1.01343	0.848128	0.841539	1.05191	1.0135	1.05971	0.88866	0.990046	1.03797
YGR024C	THG1	0.878082	0.793684	0.750857	0.9124	1.00056	0.941426	0.955418	0.97204	1.17795	1.10432
YGR026W	YGR026W	0.878082	0.793684	0.750857	0.9124	1.00056	0.941426	0.955418	0.901391	0.96914	0.981291
YGR027C	RPS25A	0.456725	0.4538	0.533459	0.613104	0.659909	0.605801	0.651704	0.857933	0.936933	0.988086
YGR030C	POP6	0.887272	0.857551	0.894441	0.905984	1.15247	0.911195	1.07599	0.903453	1.04779	0.913948
YGR031W	YGR031W	0.887272	0.857551	0.894441	0.905984	1.15247	0.911195	1.07599	0.863066	0.920235	0.906347
YGR033C	TIM21	0.45502	0.425897	0.446512	0.466116	0.583291	0.494495	0.530949	0.955046	1.06669	1.05034
YGR034W	RPL26B	0.285374	0.318076	0.346132	0.393368	0.478949	0.544209	0.558071	0.444039	0.71144	0.660383
YGR035C	YGR035C	0.503736	0.430291	0.49487	0.565591	0.721801	0.698355	0.641283	1.01818	1.11362	1.05093
YGR036C	CAX4	0.923822	0.873577	0.803227	0.875668	1.03805	0.945811	0.974896	0.993901	1.07671	1.03263
YGR037C	ACB1	0.94374	0.857405	0.742887	0.760579	0.761786	0.796341	0.8468	0.985425	1.02605	1.06658
YGR038W	ORM1	1.00205	0.829036	0.753843	0.812657	0.949783	0.896498	0.898345	0.81344	1.11172	1.02692
YGR040W	KSS1	0.96196	0.856837	0.884932	0.958621	1.02426	0.946264	1.02432	0.705204	0.894555	1.02827
YGR041W	BUD9	0.5933	0.670232	0.505952	0.672455	0.733105	0.694945	0.617984	0.359027	0.441033	0.601108
YGR042W	YGR042W	1.25572	1.08471	1.05581	1.12904	1.20643	1.17815	1.2066	1.05923	1.08445	1.07457
YGR044C	RME1	0.866245	0.542044	0.656397	0.913091	0.840904	0.865354	0.869272	0.71496	0.94994	1.12662
YGR046W	TAM41	0.911137	0.770656	0.797983	0.933667	1.09207	0.923625	1.00392	0.832638	1.09517	1.08213
YGR047C	TFC4	0.723551	0.68645	0.62177	0.673477	0.820154	0.777223	0.844049	0.849655	0.833452	1.04398
YGR048W	UFD1	0.723551	0.68645	0.62177	0.673477	0.820154	0.777223	0.844049	1.07885	1.19642	1.27237
YGR049W	SCM4	0.784334	0.786629	0.888148	0.855109	0.975652	0.808048	1.01537	0.59419	0.828759	0.779312
YGR053C	YGR053C	0.91674	0.933845	0.939914	0.987035	1.06265	1.0028	1.00328	0.697029	0.762528	0.771225
YGR054W	YGR054W	0.68605	0.68563	0.789655	0.828019	0.88734	0.89286	0.919853	0.72343	0.870284	0.797446
YGR056W	RSC1	0.640985	0.541414	0.588464	0.683745	0.748661	0.751584	0.861077	0.988702	1.04552	1.04904
YGR057C	LST7	1.14485	1.09589	1.00869	1.05426	1.03251	1.06766	1.0952	0.940613	1.00264	0.965019
YGR058W	YGR058W	1.2023	1.14033	1.01458	1.15809	1.13155	1.12268	1.24937	0.727637	0.714382	0.898609
YGR059W	SPR3	0.700472	0.702708	0.752154	0.735877	0.84889	0.736131	0.819808	0.800614	0.829583	0.767388
YGR060W	ERG25	0.259499	0.213454	0.206518	0.276647	0.333183	0.309517	0.285724	1.06993	1.07673	1.27939
YGR061C	ADE6	0.872752	0.822393	0.800748	0.79617	0.944082	0.928526	0.938737	0.911461	1.03907	1.13148
YGR062C	COX18	1.14374	1.23055	0.941112	1.00798	1.06006	1.05565	1.03183	0.493226	0.697031	0.633586
YGR063C	SPT4	0.851027	0.825902	0.711642	0.748209	0.81483	0.851303	0.817034	0.722778	0.875547	0.867248
YGR067C	YGR067C	1.17044	1.18024	0.943334	0.939061	0.986809	0.882697	0.960028	0.5962	0.632482	0.668767
YGR068C	YGR068C	0.752112	0.705833	0.635928	0.647696	0.834848	0.749049	0.768844	1.06661	1.30348	1.1768
YGR070W	ROM1	0.6623	0.582167	0.731537	0.809396	1.00966	0.902552	0.938931	1.02571	1.06562	1.18727
YGR071C	YGR071C	0.927912	1.05024	1.10794	1.19935	1.32493	1.25475	1.10526	0.406897	0.648624	0.941814
YGR072W	UPF3	0.927912	1.05024	1.10794	1.19935	1.32493	1.25475	1.10526	0.4528	0.748221	0.761009
YGR074W	SMD1	0.534132	0.591752	0.591031	0.568553	0.703449	0.637457	0.717509	0.0614398	0.0631579	0.0751935
YGR075C	PRP38	0.931857	0.870105	0.902024	1.0149	1.04677	0.908219	1.02041	0.923691	0.821935	1.04684
YGR076C	MRPL25	0.970949	1.0082	1.00408	1.07456	1.09313	1.06042	1.00966	0.373117	0.480998	0.6331
YGR077C	PEX8	0.812399	0.815515	0.643909	0.645559	0.689422	0.706992	0.752839	0.675647	0.743508	0.740865
YGR078C	PAC10	0.643398	0.692442	0.641307	0.594632	0.737293	0.746759	0.664634	0.621533	0.746726	0.787999
YGR079W	YGR079W	0.643398	0.692442	0.641307	0.594632	0.737293	0.746759	0.664634	0.673667	0.702693	0.790206
YGR080W	TWF1	0.961552	0.949921	0.911766	0.884058	0.936458	1.01884	0.954912	0.950677	0.938673	0.829664
YGR081C	SLX9	1.17033	1.00772	1.00311	0.975191	1.04122	1.09865	1.03815	1.17546	1.21509	1.20332
YGR082W	TOM20	1.17033	1.00772	1.00311	0.975191	1.04122	1.09865	1.03815	1.17546	1.21509	1.20332
YGR083C	GCD2	0.862542	0.799866	0.854836	0.923899	0.909047	0.888715	0.835882	0.914431	1.17449	1.00556
YGR084C	MRP13	0.916512	0.962268	0.870211	0.875951	0.931709	0.904821	0.96558	0.560775	0.688471	0.722876
YGR085C	RPL11B	0.486619	0.48483	0.564044	0.53866	0.663915	0.695131	0.71696	0.561765	0.706133	0.790177
YGR086C	PIL1	0.436839	0.391244	0.368444	0.434093	0.468619	0.529652	0.502833	0.937706	0.894453	1.04593
YGR087C	PDC6	0.981706	0.864611	0.805641	0.712957	0.886491	0.755043	0.920921	1.03444	1.13868	1.19545
YGR089W	NNF2	0.640779	0.520796	0.594297	0.675292	0.733226	0.705722	0.686704	1.10804	1.19719	1.1664
YGR090W	UTP22	0.448463	0.440682	0.458367	0.482482	0.551629	0.48822	0.540097	0.645834	0.67876	0.853702
YGR091W	PRP31	0.76665	0.81747	0.848539	0.922371	0.908936	0.951665	0.964214	0.701507	0.917659	0.927325
YGR092W	DBF2	0.703463	0.605678	0.631932	0.693244	0.831308	0.685335	0.778947	0.672522	0.770615	0.769078
YGR094W	VAS1	0.67435	0.53094	0.639723	0.646389	0.767852	0.695027	0.738293	1.09371	1.10555	1.13842
YGR095C	RRP46	0.963865	0.97377	0.960969	0.883982	1.03702	0.972443	0.962944	0.7498	0.919182	0.794781
YGR098C	ESP1	1.15474	1.13245	1.08449	1.15717	1.12792	1.16742	1.10775	0.775472	0.953579	1.0885
YGR099W	TEL2	1.15474	1.13245	1.08449	1.15717	1.12792	1.16742	1.10775	0.825338	0.913999	0.890414
YGR100W	MDR1	1.042	0.923436	0.917392	1.01486	1.05572	1.04589	1.05544	0.986728	0.99593	1.13194
YGR101W	PCP1	0.996923	0.929572	0.879043	0.9032	1.00851	0.966589	0.9232	0.967774	1.04753	1.23352
YGR102C	YGR102C	0.861294	0.807245	0.919248	0.780113	0.820229	0.870528	0.866797	0.946466	0.964546	1.09381
YGR103W	NOP7	0.861294	0.807245	0.919248	0.780113	0.820229	0.870528	0.866797	1.11843	1.18143	1.2617
YGR104C	SRB5	1.07367	1.0256	0.989284	1.05751	1.11387	0.997443	1.10792	0.847333	0.9666	0.867143
YGR105W	VMA21	1.07367	1.0256	0.989284	1.05751	1.11387	0.997443	1.10792	0.847333	0.9666	0.867143
YGR106C	YGR106C	0.772299	0.758385	0.626764	0.692086	0.755772	0.70351	0.773274	0.710376	0.868258	0.946387
YGR108W	CLB1	0.743554	0.78333	0.68626	1.0573	0.922488	1.12593	0.816675	0.385773	0.512394	0.596156
YGR109C	CLB6	0.766288	0.804061	0.698413	0.717284	0.741836	0.80055	0.775615	0.802946	0.939152	0.904751
YGR111W	YGR111W	1.19589	1.14299	1.04064	0.972864	1.12164	1.2753	1.18314	0.849448	1.01386	0.869652
YGR112W	SHY1	1.08247	0.970962	0.982429	0.966863	1.07564	0.995983	0.988253	1.05091	1.11638	1.22479
YGR113W	DAM1	1.21322	1.08422	1.02071	0.924849	0.860374	1.02796	0.93834	0.822026	0.941926	1.06527
YGR116W	SPT6	0.941053	0.932331	0.981152	0.895405	1.06542	0.988142	0.9463	0.883157	0.980925	0.976699
YGR117C	YGR117C	0.494461	0.486245	0.409384	0.465983	0.555798	0.526528	0.492572	1.06204	1.02124	0.986874
YGR118W	RPS23A	0.483473	0.474507	0.399607	0.457032	0.545301	0.516403	0.483366	0.897247	1.14584	1.26531
YGR119C	NUP57	0.88083	0.769884	0.759072	0.724195	0.917896	0.822722	0.863076	1.12093	1.20079	1.20959
YGR120C	COG2	0.781465	0.729048	0.732873	0.792963	0.966059	0.761863	1.03483	0.778982	0.831894	0.910442
YGR121C	MEP1	0.753057	0.414574	0.322323	0.682646	0.750191	0.743898	0.754868	0.441161	0.544157	0.659473
YGR121W-A	YGR121W-A	0.760061	0.701052	0.463101	0.725975	0.833442	0.900929	0.814941	0.836405	0.950271	1.07164
YGR122W	YGR122W	0.893388	0.557239	0.509877	0.870382	0.809753	0.868643	0.831153	0.5747	0.974623	0.920043
YGR123C	PPT1	0.89281	0.831499	0.84577	0.915472	1.0553	1.01804	1.00089	0.783394	1.03236	0.99461
YGR125W	YGR125W	0.665801	0.531889	0.657175	0.675043	0.746251	0.701183	0.811011	1.02694	0.853195	0.808107
YGR126W	YGR126W	0.981539	0.901834	0.943764	0.93645	1.00542	1.08755	1.1475	0.590915	0.811925	0.764966
YGR127W	YGR127W	0.673728	0.646095	0.673552	0.723642	0.845828	0.732009	0.751966	0.601822	0.678035	0.773926
YGR128C	UTP8	0.772187	0.785712	0.891318	0.91241	0.993257	0.860432	0.937764	0.527642	0.782097	0.849071
YGR129W	SYF2	0.772187	0.785712	0.891318	0.91241	0.993257	0.860432	0.937764	0.685212	0.84687	0.745589
YGR130C	YGR130C	1.08162	0.876126	0.850611	0.874163	0.86943	0.941797	0.932499	1.13212	1.21961	0.937911
YGR132C	PHB1	1.05341	1.00749	0.837831	0.856796	0.868653	0.954059	0.958995	0.812374	1.00451	1.10645
YGR133W	PEX4	1.371	1.22695	1.03615	1.02817	1.27126	1.13024	1.28999	0.742816	0.89459	1.08877
YGR134W	CAF130	1.09219	1.03889	0.986423	0.989649	1.01209	1.02239	1.06413	0.862106	0.958569	0.915699
YGR135W	PRE9	1.03056	1.0039	0.89191	0.890143	0.94759	0.956503	0.993813	0.629328	0.746013	0.825923
YGR136W	LSB1	0.695728	0.703285	0.718743	0.733998	0.811864	0.834849	0.899446	0.821492	0.916135	0.974177
YGR140W	CBF2	1.00129	0.986903	0.883033	1.01993	1.07199	0.965415	0.982524	0.822287	0.968376	0.950277
YGR141W	VPS62	0.823224	0.802611	0.778672	0.806219	0.777275	0.841749	0.844223	0.865697	0.896091	1.01718
YGR142W	BTN2	0.655976	0.621733	0.483313	0.579083	0.769245	0.462193	0.616561	1.06881	1.07384	1.01987
YGR143W	SKN1	0.572232	0.517699	0.443075	0.478329	0.593696	0.499213	0.512738	1.02266	1.04826	1.08023
YGR144W	THI4	0.654274	0.482031	0.60929	0.656457	0.916131	0.715611	0.784936	0.558131	0.952068	0.938928
YGR145W	ENP2	0.800526	0.703238	0.913707	0.93229	0.912088	0.916417	0.946835	1.04248	0.98901	1.12046
YGR147C	NAT2	0.618392	0.56298	0.619534	0.719247	0.833801	0.736403	0.77825	0.805783	0.815594	0.766144
YGR148C	RPL24B	0.584934	0.502815	0.432912	0.454378	0.62829	0.55126	0.634692	1.0216	1.21081	1.13854
YGR149W	YGR149W	0.584934	0.502815	0.432912	0.454378	0.62829	0.55126	0.634692	0.866103	1.07046	1.02347
YGR150C	YGR150C	1.32289	1.2813	1.15144	1.20568	1.35188	1.30244	1.23105	1.06265	1.20473	1.29848
YGR152C	RSR1	0.848584	0.799553	0.788672	0.865034	0.901468	0.874835	0.919119	1.021	0.945475	1.06937
YGR153W	YGR153W	0.848584	0.799553	0.788672	0.865034	0.901468	0.874835	0.919119	1.021	0.945475	1.06937
YGR154C	GTO1	0.725342	0.79919	0.752713	0.815923	1.02603	0.862476	0.977782	0.543946	0.681728	0.808658
YGR155W	CYS4	0.716485	0.794504	0.750499	0.816053	1.02148	0.86291	0.972094	0.334749	0.557391	0.568605
YGR156W	PTI1	0.707765	0.687043	0.766435	0.911197	1.0056	0.873696	0.905608	0.709492	0.93486	0.840929
YGR158C	MTR3	0.749744	0.746422	0.749299	0.795405	0.821938	0.771246	0.741186	1.00397	0.958318	0.980636
YGR159C	NSR1	0.844347	0.85056	0.870216	0.875512	0.86911	0.977605	0.877283	0.65053	0.780546	0.822908
YGR162W	TIF4631	0.586286	0.578979	0.588375	0.587336	0.781229	0.722398	0.714953	0.524468	0.728779	0.744364
YGR163W	GTR2	0.882761	0.737893	0.91365	1.04291	1.03993	0.947772	0.975025	0.991829	1.07641	1.05025
YGR165W	MRPS35	0.697219	0.616192	0.64957	0.750897	0.862395	0.793786	0.787081	1.07261	1.16986	1.141
YGR166W	KRE11	0.880688	0.824506	0.841553	0.908622	1.06324	0.908986	0.952177	0.915876	1.04013	0.972733
YGR167W	CLC1	0.80946	0.706952	0.694396	0.805786	0.827964	0.844661	0.932056	0.931862	0.935781	1.17107
YGR168C	YGR168C	0.959136	0.838525	0.905024	0.919448	1.01676	0.896125	0.949682	1.18447	1.11483	1.16777
YGR169C	PUS6	0.943467	0.940601	0.921438	0.950576	1.06936	1.06042	1.01393	0.567883	0.768409	0.738501
YGR169C-A	YGR169C-A	0.659729	0.580772	0.6614	0.636967	0.860505	0.711078	0.782955	1.13582	1.22238	1.16755
YGR170W	PSD2	0.659729	0.580772	0.6614	0.636967	0.860505	0.711078	0.782955	0.96177	1.18681	1.02069
YGR171C	MSM1	1.11641	1.12206	1.06421	0.986495	1.19695	1.1612	1.08779	0.754048	0.835863	0.843801
YGR172C	YIP1	1.0687	1.0174	0.915215	1.0141	1.08687	0.917715	1.01915	0.926525	0.994281	1.2399
YGR173W	RBG2	1.0687	1.0174	0.915215	1.0141	1.08687	0.917715	1.01915	0.798482	0.851193	0.822913
YGR174C	CBP4	1.15953	1.07648	1.09658	1.06598	1.30557	1.21453	1.28912	0.816633	0.989232	0.879953
YGR175C	ERG1	0.673768	0.601216	0.457563	0.491208	0.59764	0.525626	0.512082	0.843109	0.891679	1.20167
YGR177C	ATF2	0.765658	0.870506	0.775033	0.98269	1.12389	0.974773	1.10041	0.374364	0.544554	0.51959
YGR178C	PBP1	0.834431	0.728371	0.660571	0.796128	0.86003	0.857014	0.774785	1.0482	1.01446	1.0842
YGR179C	OKP1	0.758316	0.73432	0.7491	0.840426	0.864758	0.780328	0.840456	0.889173	0.973432	1.03724
YGR180C	RNR4	0.816814	0.739457	0.718922	0.758714	0.976783	0.862893	0.934287	0.684656	0.808766	0.78677
YGR181W	TIM13	1.16415	1.1201	1.0573	0.971128	1.24155	1.11884	1.18452	0.949317	1.11893	1.11959
YGR183C	QCR9	0.763282	0.73795	0.576297	0.744168	0.763668	0.745095	0.777734	0.896431	0.77823	0.9246
YGR184C	UBR1	0.877854	0.719919	0.721296	0.808243	0.826544	0.822282	0.849868	0.951112	1.28022	1.1431
YGR185C	TYS1	1.10628	1.02772	0.956949	0.880718	1.08679	0.953144	1.09269	0.681127	0.822352	0.905385
YGR186W	TFG1	1.10628	1.02772	0.956949	0.880718	1.08679	0.953144	1.09269	1.02584	1.28935	1.42353
YGR187C	HGH1	0.753812	0.698065	0.72541	0.750116	0.894863	0.82359	0.824033	0.707714	0.821698	0.676146
YGR188C	BUB1	0.964669	0.929567	0.993123	1.20035	1.20247	1.13148	1.14307	0.902191	1.15387	1.11999
YGR189C	CRH1	0.643913	0.541266	0.480309	0.538739	0.611367	0.576417	0.687769	0.631941	0.812793	0.757385
YGR191W	HIP1	1.01737	0.837116	0.900623	0.87554	1.05979	0.836385	1.05061	1.12184	1.33008	1.25578
YGR192C	TDH3	0.349747	0.335317	0.34061	0.562861	0.393671	0.450313	0.276071	0.751868	0.810035	0.980963
YGR193C	PDX1	0.956337	0.842917	0.823078	0.859004	1.07649	0.887111	1.02154	0.967995	1.00843	1.07073
YGR194C	XKS1	1.14727	1.0489	1.09175	0.928024	1.18361	1.02047	1.07819	1.2825	1.18427	1.02432
YGR195W	SKI6	0.83266	0.799312	0.831382	0.933931	0.988692	0.811816	0.910387	0.753005	0.957045	0.780581
YGR196C	FYV8	0.926688	0.889601	0.983968	0.88345	0.994287	0.968001	0.973846	0.831181	0.983201	0.948546
YGR197C	SNG1	1.02349	0.92125	0.817873	0.842615	0.820617	0.807266	0.969973	1.09676	1.07642	1.15305
YGR198W	YPP1	1.02349	0.92125	0.817873	0.842615	0.820617	0.807266	0.969973	0.911131	0.991726	1.04911
YGR199W	PMT6	0.807574	0.658154	0.790877	0.844639	1.06791	1.02644	0.950191	0.98785	1.12085	1.2067
YGR200C	ELP2	0.944178	0.91972	0.896443	0.99113	1.08991	1.02636	1.03696	0.823947	0.995306	0.842892
YGR202C	PCT1	0.743284	0.539793	0.540253	0.628678	0.918825	0.750001	0.855542	0.558754	0.670826	0.819748
YGR203W	YGR203W	0.749679	0.54781	0.537847	0.625004	0.918048	0.746833	0.852983	0.679465	0.738133	0.957092
YGR205W	YGR205W	0.780674	0.690888	0.70731	0.78851	0.931539	0.913616	0.929935	0.824983	1.02336	0.993543
YGR206W	YGR206W	0.726885	0.674385	0.746997	0.859085	0.902792	0.859456	0.838578	0.835187	0.887996	0.712988
YGR207C	YGR207C	0.851133	0.846637	0.903876	0.902142	0.95158	0.925155	1.0127	0.808123	0.814812	0.695412
YGR208W	SER2	0.851133	0.846637	0.903876	0.902142	0.95158	0.925155	1.0127	0.716403	0.65875	0.792152
YGR209C	TRX2	0.999745	0.918042	0.722511	0.717992	0.954273	0.847493	0.826641	0.930886	1.12275	1.04262
YGR210C	YGR210C	0.807646	0.776238	0.737619	0.758565	0.947394	0.822887	0.904173	0.895382	0.946978	1.07602
YGR211W	ZPR1	0.807646	0.776238	0.737619	0.758565	0.947394	0.822887	0.904173	0.503997	0.873209	0.871533
YGR212W	SLI1	0.773824	0.745005	0.871022	1.00978	1.04166	1.00832	1.0444	0.902191	1.15387	1.11999
YGR213C	RTA1	0.388226	0.351375	0.350825	0.393227	0.464601	0.441611	0.524992	1.05553	1.1454	1.18331
YGR214W	RPS0A	0.388226	0.351375	0.350825	0.393227	0.464601	0.441611	0.524992	1.05553	1.1454	1.18331
YGR215W	RSM27	0.721143	0.676896	0.664059	0.672208	0.768278	0.737417	0.773347	0.910869	1.05359	0.901856
YGR216C	GPI1	1.12725	1.11155	1.0184	1.08823	1.15879	1.12036	1.09765	0.857005	0.923533	0.969117
YGR217W	CCH1	1.12725	1.11155	1.0184	1.08823	1.15879	1.12036	1.09765	0.722985	0.809989	1.03041
YGR218W	CRM1	0.64938	0.634651	0.691686	0.72999	0.916645	0.744254	0.77141	0.823618	0.877322	0.959872
YGR220C	MRPL9	0.844291	0.8772	0.867529	0.899708	1.04417	0.967958	1.04128	0.791587	0.857845	0.846117
YGR221C	TOS2	0.792014	0.734373	0.767815	0.827854	0.955427	0.867646	0.934958	0.689102	0.738012	0.734465
YGR222W	PET54	0.792014	0.734373	0.767815	0.827854	0.955427	0.867646	0.934958	0.948136	1.02629	1.03512
YGR223C	HSV2	0.923103	0.944488	0.790934	0.90357	1.03595	0.915975	0.965505	0.706761	0.842512	0.753352
YGR224W	AZR1	0.771861	0.770374	0.780359	0.888465	1.06752	0.932278	0.997397	0.834429	0.943535	1.03068
YGR225W	AMA1	0.684086	0.629538	0.721273	0.861826	0.924043	0.853952	0.777928	0.839327	1.03685	1.08594
YGR227W	DIE2	0.86953	0.822195	0.804313	0.900787	0.956958	0.948808	0.959399	0.616595	0.689128	0.898999
YGR229C	SMI1	0.46192	0.525459	0.517636	0.630201	0.637975	0.629554	0.615869	0.335753	0.465109	0.471195
YGR230W	BNS1	0.945934	0.957688	0.982836	0.922538	1.20699	0.921375	1.12939	0.637788	0.936446	0.720138
YGR231C	PHB2	0.767423	0.695581	0.780728	0.75446	0.93178	0.811805	0.886363	0.746214	1.02923	1.02895
YGR233C	PHO81	0.954656	0.960505	0.802987	0.887652	1.0068	0.952959	1.03056	0.70697	0.798439	0.941435
YGR234W	YHB1	0.721032	0.762964	0.64981	0.802164	0.856672	0.8324	0.843572	0.718776	0.923683	0.852512
YGR235C	YGR235C	0.794579	0.72186	0.793279	0.870561	0.944923	0.958197	1.0046	0.703955	0.946192	0.982562
YGR236C	SPG1	0.896442	0.886347	0.958722	0.966681	0.986382	1.01402	0.920644	0.718141	0.712694	0.826084
YGR238C	KEL2	0.928223	1.03135	0.809122	0.905255	0.826975	0.965007	0.859508	0.482644	0.570687	0.531848
YGR239C	PEX21	0.93901	0.845025	0.790727	0.776088	0.998905	0.793383	0.916767	0.93166	1.00135	1.00332
YGR240C	PFK1	0.396329	0.350343	0.417725	0.528702	0.686771	0.555752	0.594136	0.783746	0.848023	0.789812
YGR241C	YAP1802	0.474785	0.40618	0.461611	0.519832	0.635468	0.706626	0.631498	0.838329	0.864594	0.912809
YGR243W	FMP43	0.474785	0.40618	0.461611	0.519832	0.635468	0.706626	0.631498	0.659721	0.797507	0.898313
YGR244C	LSC2	0.887637	0.846895	0.827138	0.880713	0.862923	0.888351	0.793679	0.88205	0.900666	1.06001
YGR245C	SDA1	0.834516	0.834248	0.85636	0.871983	0.804567	0.915914	0.901261	0.958195	1.02515	1.16595
YGR246C	BRF1	1.08609	1.11061	0.978308	1.04086	1.06134	1.05091	0.945991	0.614341	0.717343	0.651979
YGR247W	CPD1	0.805494	0.787193	0.854493	0.938603	0.95918	0.905389	0.953993	0.691168	0.958151	0.915423
YGR250C	YGR250C	0.883466	0.673644	0.631059	0.687666	0.855936	0.73069	0.841789	0.976469	1.06247	1.03881
YGR251W	YGR251W	1.0746	1.04897	0.954819	1.01989	1.11489	1.05656	1.07163	0.781797	0.923307	0.95928
YGR252W	GCN5	0.84244	0.785847	0.745311	0.866686	0.522302	0.876103	0.571769	0.892529	0.95414	0.853057
YGR253C	PUP2	0.740967	0.663556	0.716106	0.623789	0.85865	0.688028	0.741387	1.04988	1.15157	1.15878
YGR255C	COQ6	0.524837	0.450346	0.536479	0.54588	0.732666	0.623338	0.604724	1.02749	1.28374	1.33429
YGR256W	GND2	0.524837	0.450346	0.536479	0.54588	0.732666	0.623338	0.604724	0.797385	1.19933	1.14138
YGR257C	MTM1	0.975686	0.840807	0.820278	0.810428	0.812741	0.826425	0.855945	0.929057	1.08444	1.20267
YGR258C	RAD2	0.81025	0.878482	0.674155	0.717913	0.713105	0.814813	0.748771	0.491569	0.632431	0.608203
YGR261C	APL6	0.994495	0.904568	0.853342	0.864287	0.921639	0.887495	0.853641	0.721154	0.879707	0.802734
YGR262C	BUD32	1.0227	1.02442	0.881277	0.813114	1.02585	0.863204	0.920346	0.860957	0.97693	1.0277
YGR263C	YGR263C	0.772196	0.762621	0.830638	0.962655	0.991221	0.994022	0.907357	0.691832	0.927307	0.83009
YGR264C	MES1	0.72461	0.689564	0.682273	0.6758	0.775767	0.776079	0.712722	0.672314	0.850198	0.794822
YGR266W	YGR266W	0.880309	0.835629	0.842033	0.857316	1.01766	0.930386	0.976221	0.933464	1.1502	1.0534
YGR268C	HUA1	0.908981	0.821588	0.644258	0.634826	0.925523	0.729169	0.933987	0.890351	0.977511	1.21303
YGR270W	YTA7	0.908981	0.821588	0.644258	0.634826	0.925523	0.729169	0.933987	0.890351	0.977511	1.21303
YGR271C-A	YGR271C-A	0.677119	0.664383	0.829948	0.906683	0.942799	0.971899	0.934613	0.622161	0.775064	0.77512
YGR271W	SLH1	0.707541	0.661574	0.720072	0.852293	0.849363	0.868743	0.803773	0.821237	0.881476	1.10736
YGR273C	YGR273C	1.00142	1.04398	1.06705	0.956864	0.856423	0.901532	0.924018	0.626338	0.751513	0.756335
YGR274C	TAF1	1.24062	1.25639	1.11823	1.15853	1.24266	1.36524	1.2519	0.577424	0.818116	0.783628
YGR275W	RTT102	1.24062	1.25639	1.11823	1.15853	1.24266	1.36524	1.2519	0.923262	0.907553	0.897652
YGR276C	RNH70	0.984135	1.03379	0.921412	0.959239	1.03201	1.01641	1.08989	0.666729	0.731003	0.874546
YGR277C	YGR277C	0.909445	0.896126	1.00179	1.0131	1.10163	1.04935	1.01019	0.608257	0.720685	0.799594
YGR278W	CWC22	0.909445	0.896126	1.00179	1.0131	1.10163	1.04935	1.01019	0.920334	1.01579	1.02996
YGR279C	SCW4	0.262496	0.280994	0.329536	0.613602	0.361825	0.611679	0.407346	0.555567	0.661423	0.581547
YGR280C	PXR1	0.795029	0.763141	0.732466	0.754838	0.836657	0.8723	0.792861	0.921985	0.894539	0.938186
YGR281W	YOR1	0.686842	0.685717	0.543557	0.675181	0.660559	0.721647	0.675269	0.836749	0.878728	0.910283
YGR282C	BGL2	0.728762	0.704496	0.648468	0.645661	0.777582	0.678664	0.727876	0.809468	0.833585	0.989972
YGR283C	YGR283C	0.845272	0.864256	0.795409	0.963078	1.0651	0.923439	0.9661	0.955253	0.949565	1.03507
YGR284C	ERV29	0.848577	0.949467	0.826314	0.744143	0.78481	0.802694	0.853787	0.632076	0.723929	0.7335
YGR285C	ZUO1	0.484499	0.479166	0.451302	0.47545	0.626831	0.50211	0.530586	0.97709	1.10231	1.24169
YGR287C	YGR287C	0.7106	0.654769	0.768163	0.829868	0.71382	0.772209	0.723381	0.812367	0.950649	0.886595
YGR289C	MAL11	0.68307	0.691107	0.65352	0.731424	0.680987	0.757178	0.749564	0.737789	0.725381	0.814067
YGR292W	MAL12	0.68307	0.691107	0.65352	0.731424	0.680987	0.757178	0.749564	0.737789	0.725381	0.814067
YGR295C	COS6	0.731922	0.741398	0.713936	0.710833	0.803005	0.707556	0.818777	0.62014	0.791183	0.913764
YHL001W	RPL14B	0.725296	0.667193	0.652941	0.661228	0.791384	0.699446	0.755759	1.1121	1.23103	1.34345
YHL003C	LAG1	1.1008	0.994825	0.907188	0.860473	1.0383	0.979562	1.03003	0.771654	0.802379	1.06213
YHL004W	MRP4	1.04931	0.879578	0.79734	0.795717	1.06843	0.88758	0.979012	1.08315	1.17939	1.08858
YHL006C	SHU1	1.04931	0.879578	0.79734	0.795717	1.06843	0.88758	0.979012	1.08315	1.17939	1.08858
YHL007C	STE20	0.884114	0.758125	0.563485	0.599561	0.745471	0.658304	0.718746	1.13807	1.16258	1.53265
YHL008C	YHL008C	0.911953	0.771269	0.759133	0.915639	1.05769	0.97088	1.0182	1.00251	1.00803	0.93496
YHL009C	YAP3	0.477356	0.542984	0.569667	0.643468	0.722588	0.665969	0.675306	0.374364	0.544554	0.51959
YHL010C	YHL010C	0.845179	0.756645	0.854632	0.918637	1.03762	0.958206	0.958158	1.01699	1.0474	0.943646
YHL011C	PRS3	0.657505	0.617771	0.658839	0.70599	0.728471	0.799125	0.726599	0.797845	0.883747	0.863125
YHL012W	YHL012W	0.773881	0.820695	0.967501	0.996367	1.00653	1.06029	0.983958	0.615907	0.693877	0.608357
YHL013C	OTU2	0.907637	0.871517	0.959312	1.12525	1.29341	1.16421	1.24948	0.84722	0.927368	0.902099
YHL014C	YLF2	1.09831	1.06939	1.07632	1.12161	1.04809	1.01806	1.07495	0.54918	0.714648	0.637571
YHL015W	RPS20	0.604378	0.609073	0.609223	0.732068	0.90352	0.703223	0.836951	0.750772	1.06482	0.95927
YHL017W	YHL017W	1.13314	1.03939	0.947906	0.864591	1.00313	0.956737	1.04158	0.862227	1.03776	1.15574
YHL018W	YHL018W	1.34921	1.26305	1.22856	1.21561	1.38112	1.28507	1.3456	0.953253	1.08611	0.987398
YHL019C	APM2	1.34921	1.26305	1.22856	1.21561	1.38112	1.28507	1.3456	0.942624	0.963599	1.06372
YHL020C	OPI1	1.09398	1.12821	0.925347	0.919191	0.996532	1.03483	0.981213	0.710011	0.835686	0.838918
YHL023C	RMD11	0.633208	0.585017	0.599814	0.654966	0.718911	0.667124	0.629078	0.9706	1.1874	0.94206
YHL024W	RIM4	0.538976	0.450966	0.552765	0.586896	0.606217	0.66511	0.552839	0.915936	1.0203	0.82908
YHL025W	SNF6	0.909969	0.846452	0.597888	0.587839	0.92003	0.813681	0.868002	0.646401	0.856951	0.984589
YHL026C	YHL026C	0.742464	0.684509	0.633916	0.59322	0.86098	0.739731	0.761426	1.04086	1.06685	1.15441
YHL029C	OCA5	0.531844	0.527285	0.41654	0.655434	0.456472	0.748263	0.44414	0.615693	0.914387	0.836416
YHL030W	ECM29	0.991977	0.974613	0.950408	1.01523	1.01882	1.02816	1.04193	0.804445	0.881381	1.06554
YHL031C	GOS1	1.24265	1.35786	1.09632	1.1549	1.20969	1.2005	1.18496	0.369813	0.500937	0.458886
YHL032C	GUT1	0.829298	0.792699	0.816579	0.850857	0.985453	0.936025	0.911216	0.88833	0.877537	0.852394
YHL033C	RPL8A	0.515678	0.492937	0.560518	0.527071	0.554013	0.599288	0.61178	0.750693	0.877412	0.999538
YHL034C	SBP1	0.777203	0.68729	0.774204	0.822874	0.845327	0.887893	0.896756	0.75575	0.905575	0.978735
YHL038C	CBP2	1.21756	1.24601	1.12241	1.07514	1.02321	1.03342	1.1551	0.558392	0.683721	0.840836
YHL039W	YHL039W	1.10285	1.14074	1.08728	1.01323	1.17128	1.11707	1.15028	0.419892	0.625027	0.742433
YHL040C	ARN1	1.0668	1.17084	1.00546	1.14887	1.26093	1.10848	1.16529	0.525519	0.525386	0.639686
YHL046C	PAU13	0.754246	0.770977	0.879771	0.940499	0.960701	0.937379	0.919802	0.682606	0.662091	0.708206
YHL048W	COS8	0.500487	0.486383	0.458567	0.496875	0.573591	0.51292	0.489007	0.763961	0.84927	0.908047
YHL049C	YHL049C	0.974309	0.991053	0.67276	0.556535	0.702976	0.621748	0.721813	0.642344	0.887048	0.773124
YHR001W	OSH7	0.768795	0.69212	0.806996	0.842828	1.02625	0.803465	0.953695	0.933752	1.10055	0.925574
YHR001W-A	QCR10	0.829816	0.802713	0.76879	0.773992	1.01788	0.822631	0.97274	0.810503	0.845302	0.807632
YHR002W	LEU5	0.749766	0.645763	0.797597	0.848906	0.968029	0.905474	0.948531	0.829436	0.983994	1.0336
YHR003C	YHR003C	0.780447	0.690497	0.796014	0.828795	0.854232	0.787785	0.891703	0.943692	0.9803	0.883277
YHR004C	NEM1	0.724135	0.629652	0.717506	0.786556	0.949079	0.733377	0.901712	0.806738	0.951643	1.03365
YHR005C	GPA1	0.481099	0.313714	0.519321	0.651726	0.775865	0.788165	0.803298	0.933464	1.1502	1.0534
YHR005C-A	MRS11	0.69137	0.630716	0.711583	0.652954	0.875991	0.733036	0.813365	1.07876	1.20514	1.27381
YHR007C	ERG11	0.663523	0.612839	0.673983	0.810444	0.893233	0.797187	0.810378	1.03326	0.93396	1.04789
YHR007C-A	YHR007C-A	0.664195	0.596455	0.630556	0.68243	0.92776	0.761572	0.960842	1.02088	1.04466	1.19804
YHR008C	SOD2	0.911808	0.801385	0.730515	0.562294	0.922453	0.884595	0.841411	1.09983	1.24573	1.28521
YHR009C	YHR009C	0.897619	0.897735	0.784713	0.748003	0.951217	0.903834	0.839386	0.650659	0.7761	0.731689
YHR010W	RPL27A	0.432223	0.403441	0.464366	0.408635	0.609303	0.485427	0.544266	0.813918	1.02284	1.01887
YHR012W	VPS29	1.14011	0.991872	0.960067	1.0263	1.12455	1.11615	1.05103	1.17195	1.12465	1.2417
YHR013C	ARD1	0.905268	0.828211	0.888704	0.902633	1.0272	0.965943	0.978457	0.997371	1.00712	1.097
YHR014W	SPO13	0.905268	0.828211	0.888704	0.902633	1.0272	0.965943	0.978457	0.711277	0.829158	1.00106
YHR021C	RPS27B	0.338139	0.312013	0.351659	0.368284	0.534278	0.470561	0.469334	1.05813	1.17687	1.1235
YHR023W	MYO1	0.73821	0.464744	0.658578	0.680684	0.8183	0.79157	0.867441	0.593139	0.624982	0.708388
YHR025W	THR1	1.2036	1.13599	0.904288	0.965072	1.08675	0.964	1.04501	0.952758	0.845822	0.919867
YHR026W	PPA1	1.04753	0.884019	0.90677	0.871075	0.936644	0.854972	0.899419	0.996279	1.0583	0.868537
YHR027C	RPN1	1.08784	0.909819	0.961217	0.980241	1.09126	0.972576	1.06725	0.994178	1.01761	0.932405
YHR028C	DAP2	0.727205	0.644144	0.742735	0.806886	0.792278	0.743961	0.847329	0.94858	1.02632	1.05091
YHR031C	RRM3	0.846421	0.751926	0.704786	0.735769	0.822156	0.846044	0.790426	0.833459	0.838663	0.854574
YHR032W	YHR032W	0.846421	0.751926	0.704786	0.735769	0.822156	0.846044	0.790426	1.04468	1.18443	1.17769
YHR033W	YHR033W	0.856909	0.86397	0.711949	0.672574	0.659761	0.746906	0.731315	0.616594	0.723827	0.811163
YHR034C	PIH1	1.09475	1.02931	1.06392	0.96551	1.02128	0.969195	1.10941	0.704622	0.689154	0.79381
YHR035W	YHR035W	1.09475	1.02931	1.06392	0.96551	1.02128	0.969195	1.10941	0.950979	1.21002	0.947935
YHR036W	BRL1	0.938689	0.921057	0.889011	0.943538	1.00285	1.05849	0.986504	0.773854	0.948491	0.752901
YHR037W	PUT2	1.06843	1.00697	0.916596	0.921134	1.01283	0.977279	1.09145	0.825488	0.86746	0.952112
YHR038W	RRF1	0.798208	0.757514	0.885665	1.0241	1.11586	1.03312	0.995407	0.681031	1.0114	0.934378
YHR039C	MSC7	0.486606	0.468408	0.480154	0.609595	0.6519	0.559782	0.632103	0.939461	1.05142	0.983385
YHR039C-A	VMA10	0.927142	1.01769	0.842781	0.841031	0.951499	0.937693	1.05304	0.416189	0.565199	0.646985
YHR040W	BCD1	0.927142	1.01769	0.842781	0.841031	0.951499	0.937693	1.05304	0.441536	0.576075	0.508881
YHR041C	SRB2	1.03335	1.03809	0.687091	0.6898	0.673306	0.745344	0.673403	0.760849	0.905152	0.794959
YHR042W	NCP1	1.03335	1.03809	0.687091	0.6898	0.673306	0.745344	0.673403	0.792173	0.900433	0.796961
YHR043C	DOG2	0.78154	0.790325	0.826954	0.953755	1.00026	1.00249	1.00985	0.697757	0.86681	0.863672
YHR044C	DOG1	1.01146	1.01139	0.910034	1.01002	1.03689	0.994205	1.02281	0.751519	0.904373	0.78938
YHR045W	YHR045W	1.00922	1.01007	0.910068	1.00926	1.03659	0.993708	1.02213	0.787371	0.939348	0.96384
YHR046C	INM1	0.743619	0.704711	0.717427	0.844211	0.943774	0.854075	0.84633	0.885047	1.00985	1.02779
YHR048W	YHR048W	0.975235	0.886588	0.814734	0.896538	0.917872	0.946085	0.867105	0.836546	0.94898	0.969911
YHR049W	FSH1	0.725406	0.732282	0.680651	0.787601	0.928907	0.794201	0.881435	0.878471	0.910763	0.908516
YHR050W	SMF2	0.766213	0.78775	0.742939	0.81048	0.901942	0.795495	0.924422	0.699503	0.757191	0.792895
YHR050W-A	YHR050W-A	0.683007	0.740801	0.695237	0.734456	0.895232	0.816937	0.814117	0.312838	0.58461	0.537968
YHR051W	COX6	0.683007	0.740801	0.695237	0.734456	0.895232	0.816937	0.814117	0.66912	0.720278	0.886024
YHR052W	CIC1	0.581349	0.571071	0.786008	0.896278	0.926194	0.895191	0.949336	0.797822	0.913199	1.04843
YHR056C	RSC30	1.24946	1.1603	0.962115	0.92573	1.0017	1.11664	1.0947	0.783644	0.964514	1.10435
YHR057C	CPR2	1.04614	1.12527	1.00144	1.01507	0.969212	1.02989	1.10799	0.500113	0.573014	0.619906
YHR058C	MED6	1.19835	1.19655	1.09587	1.13795	1.20498	1.19377	1.15482	0.723863	0.841228	0.820655
YHR059W	FYV4	1.19835	1.19655	1.09587	1.13795	1.20498	1.19377	1.15482	0.773593	0.743504	0.838289
YHR060W	VMA22	1.11816	1.13994	1.12496	1.17798	1.24223	1.34061	1.20716	0.646153	0.72213	0.794467
YHR061C	GIC1	0.729166	0.73197	0.665987	0.702238	0.766491	0.780775	0.755663	0.898344	0.878932	1.01406
YHR062C	RPP1	0.918002	0.820363	0.759133	0.959175	0.895085	0.885823	0.939224	1.00872	1.00415	0.99427
YHR063C	PAN5	0.798185	0.752589	0.836752	0.803964	0.810768	0.772862	0.772137	0.803594	0.929917	0.865201
YHR064C	SSZ1	0.775	0.780474	0.694924	0.705412	0.694783	0.674169	0.693699	0.878808	1.01609	0.940458
YHR065C	RRP3	0.822554	0.805528	0.767895	0.80354	1.00099	0.916378	0.909568	0.828106	1.09277	0.871815
YHR066W	SSF1	0.822554	0.805528	0.767895	0.80354	1.00099	0.916378	0.909568	0.549812	0.720782	0.860326
YHR067W	HTD2	1.15959	1.10684	1.0312	1.0972	1.02855	1.1286	1.0965	0.8857	1.05808	1.10017
YHR068W	DYS1	0.933784	0.896071	0.877435	0.885031	0.998474	0.984576	1.03823	0.959232	1.04859	1.07576
YHR069C	RRP4	0.855484	0.842883	0.786625	0.857389	0.947497	0.840412	0.900292	0.64865	0.807734	0.82451
YHR070W	TRM5	0.855484	0.842883	0.786625	0.857389	0.947497	0.840412	0.900292	0.772792	0.907098	1.05209
YHR072W	ERG7	0.855103	0.857757	0.886223	0.84632	1.06538	0.984802	1.03348	0.71771	0.794503	0.79165
YHR072W-A	NOP10	0.829166	0.783652	0.791841	0.801242	0.906556	0.89317	0.924148	0.666693	0.728039	0.797653
YHR073W	OSH3	1.16643	1.02436	0.946884	1.01221	1.09651	1.01785	0.987653	0.991439	1.10362	1.14259
YHR074W	QNS1	0.96592	0.947902	0.897976	0.961657	0.95168	0.990663	1.02441	0.718769	0.835761	0.860079
YHR075C	PPE1	1.22557	1.1634	1.15259	1.22499	1.39612	1.2323	1.15858	0.825519	0.918987	0.850392
YHR076W	PTC7	1.03831	1.02321	1.03867	1.09332	1.03579	1.08085	1.10946	0.889324	0.934831	1.0461
YHR077C	NMD2	0.630939	0.699655	0.733418	0.74355	0.901335	0.7903	0.850807	0.382333	0.498261	0.502097
YHR078W	YHR078W	1.15245	1.09753	1.14018	1.02223	1.2644	1.1753	1.21596	0.719802	0.882766	0.884157
YHR079C	IRE1	0.755537	0.722382	0.656105	0.78433	0.859194	0.854159	0.752094	1.05063	1.04931	1.00244
YHR079C-A	SAE3	0.913361	0.900804	0.961542	1.03719	1.12888	1.13779	1.138	0.750516	0.937935	0.947571
YHR080C	YHR080C	1.02667	0.93138	0.866012	0.900513	0.964499	1.11382	0.97164	0.781055	1.04191	0.999937
YHR081W	LRP1	1.07692	0.996941	0.841175	0.885106	1.00107	1.03196	1.01194	0.74779	0.916961	0.989968
YHR082C	KSP1	0.816791	0.873258	0.797167	0.852071	1.02908	0.93997	1.01533	0.444528	0.595763	0.744154
YHR083W	SAM35	1.12659	1.07141	0.815581	0.839393	0.88703	0.967489	0.991232	0.669903	0.806062	0.986679
YHR084W	STE12	0.789273	0.667245	0.731891	0.699434	0.941381	0.875779	0.945823	1.37133	1.63609	1.2998
YHR085W	IPI1	0.702386	0.600147	0.740459	0.749972	0.786167	0.851313	0.782875	1.0108	1.22626	1.22068
YHR086W	NAM8	0.863442	0.799301	0.760469	0.806696	0.894064	0.823694	0.784799	0.944506	0.947589	1.14354
YHR088W	RPF1	0.965936	0.77705	0.873603	0.93118	1.02468	0.999383	1.05386	0.987891	1.04848	1.06726
YHR089C	GAR1	0.757763	0.723319	0.826781	0.813267	0.819709	0.792694	0.853631	0.708255	0.878976	0.908982
YHR090C	YNG2	0.968287	0.879843	0.959395	0.941837	1.05842	0.969655	0.992468	0.759353	0.820916	1.06937
YHR091C	MSR1	0.952488	0.794299	0.759737	0.862763	0.892981	0.825517	0.885424	0.844817	1.08749	1.23561
YHR092C	HXT4	0.442381	0.463683	0.453863	0.608571	0.646285	0.538327	0.532736	0.473842	0.587678	0.611494
YHR094C	HXT1	0.67134	0.466692	0.678621	0.717886	0.768025	0.870836	0.836268	0.437692	0.626488	0.720929
YHR098C	SFB3	1.15356	1.05199	0.967093	0.947781	0.993099	0.943117	1.0293	0.928652	0.989952	0.917153
YHR099W	TRA1	1.25581	1.12869	1.00305	1.07021	1.03207	1.0162	1.01289	1.02843	1.03277	1.11884
YHR100C	YHR100C	0.93291	0.820336	0.882428	0.946041	0.966221	0.906455	0.937767	0.979647	1.09667	1.0729
YHR101C	BIG1	1.27339	1.2055	0.907309	1.05663	1.13904	1.09284	1.15673	0.774325	0.8592	1.03021
YHR102W	KIC1	1.27339	1.2055	0.907309	1.05663	1.13904	1.09284	1.15673	0.833657	0.931776	0.87695
[truncated: 2,751 more rows]

## Sheet: All genes_3zones
Avg H3 Occ. in combined [-1,NDR,+1] zones for all 5403 genes
Systematic name	Common name	WT-U	WT-I	ydj1∆-I	snf2∆-I	gcn5∆-I	snf2∆ydj1∆/lcGCN4-I	gcn5∆ydj1∆-I	Ptet-SNF2-I	Ptet-SNF2gcn5∆-I	Ptet-SNF2gcn5∆ydj1∆/lcGCN4-I
YAL001C	TFC3	0.898052	0.802727	0.822922	0.852436	1.07413	0.829252	0.97476	0.946428	1.09148	1.08976
YAL002W	VPS8	0.646517	0.638527	0.67365	0.737559	0.877158	0.76041	0.807051	0.776651	0.898614	0.863209
YAL003W	EFB1	0.378792	0.446486	0.387316	0.550864	0.689938	0.653233	0.624159	0.462338	0.581321	0.511629
YAL005C	SSA1	0.383906	0.452551	0.393707	0.555465	0.696019	0.65939	0.630479	0.443613	0.540018	0.496818
YAL007C	ERP2	1.11375	1.03764	1.00726	1.05238	1.25705	1.23152	1.13115	0.924722	1.09028	0.951991
YAL008W	FUN14	1.13328	1.07134	1.05111	1.08539	1.27477	1.1311	1.13328	1.03998	1.0067	0.964932
YAL009W	SPO7	1.36161	1.32078	1.28125	1.30549	1.49697	1.25049	1.37629	0.727378	0.827586	0.817724
YAL010C	MDM10	1.36161	1.32078	1.28125	1.30549	1.49697	1.25049	1.37629	0.779361	0.993861	0.865452
YAL011W	SWC3	1.24165	1.17957	1.10989	1.06617	1.09067	1.14392	1.15439	0.881495	0.960402	0.917466
YAL012W	CYS3	0.871269	0.823931	0.853023	0.783609	0.793887	0.876858	0.967958	0.85966	0.861367	0.981868
YAL013W	DEP1	1.33446	1.30792	1.03464	1.00648	1.30971	1.11013	1.21935	0.791798	1.15372	1.03104
YAL014C	SYN8	1.33446	1.30792	1.03464	1.00648	1.30971	1.11013	1.21935	0.895201	0.943238	1.08786
YAL015C	NTG1	0.967112	0.934659	0.916805	0.906165	1.0428	0.984715	1.00349	0.793333	0.852344	0.891879
YAL016W	TPD3	1.19373	1.14668	1.05792	1.11386	1.18511	1.1106	1.13245	0.970861	1.0417	1.00426
YAL017W	PSK1	0.86636	0.892843	0.901076	0.937762	1.11901	0.998772	0.986696	0.59138	0.666203	0.783958
YAL018C	YAL018C	0.86636	0.892843	0.901076	0.937762	1.11901	0.998772	0.986696	0.547129	0.738284	0.764912
YAL019W	FUN30	1.44928	1.48805	1.0808	1.04788	1.16439	1.14458	1.0979	0.703765	0.712539	0.745876
YAL020C	ATS1	1.44928	1.48805	1.0808	1.04788	1.16439	1.14458	1.0979	0.392078	0.6365	0.780661
YAL021C	CCR4	1.34391	1.31672	1.05334	0.917667	1.12274	1.01101	0.946251	0.917398	0.960557	0.93215
YAL022C	FUN26	0.899291	0.878499	0.90663	0.93658	1.13825	1.0413	1.08061	0.73163	0.761521	0.859591
YAL023C	PMT2	1.09156	1.0879	0.826662	0.801372	0.890799	0.962519	0.927755	0.541935	0.863012	0.826935
YAL024C	LTE1	0.834968	0.83865	0.870692	0.991878	1.12466	1.01165	0.992043	0.788269	0.954362	1.1514
YAL025C	MAK16	0.667214	0.649821	0.711443	0.769586	0.890437	0.810426	0.792232	0.776753	0.855344	1.16326
YAL026C	DRS2	0.817258	0.885777	0.890217	0.924842	0.9504	0.946418	0.934998	0.435533	0.611256	0.538118
YAL027W	YAL027W	1.04331	0.956843	0.998117	1.09567	1.24787	1.18584	1.23343	0.92515	1.01443	1.07252
YAL028W	FRT2	0.725377	0.627448	0.668239	0.724907	0.793015	0.861394	0.855996	0.497559	0.658611	0.548785
YAL029C	MYO4	0.725377	0.627448	0.668239	0.724907	0.793015	0.861394	0.855996	0.849109	0.898632	0.861621
YAL030W	SNC1	1.21118	1.06074	0.976252	1.0949	1.20708	1.22554	1.08461	0.923962	0.985489	1.13653
YAL031C	GIP4	1.21118	1.06074	0.976252	1.0949	1.20708	1.22554	1.08461	0.923962	0.985489	1.13653
YAL032C	PRP45	0.81895	0.838754	0.764848	0.765782	1.01984	0.878784	0.87184	0.621319	0.811563	0.725316
YAL033W	POP5	1.34101	1.35431	1.21702	1.24557	1.40607	1.37209	1.55382	0.555913	0.860805	0.867888
YAL034C	FUN19	1.24523	1.12965	0.954615	0.96541	1.19994	1.17705	1.09664	0.553829	0.616343	0.670804
YAL034W-A	MTW1	1.15332	1.16217	1.15048	1.09446	1.22106	1.213	1.20966	0.570243	0.63449	0.735095
YAL035W	FUN12	1.23006	1.32795	1.13368	1.03184	1.2417	1.23377	1.26824	0.458984	0.558941	0.527113
YAL036C	RBG1	1.23006	1.32795	1.13368	1.03184	1.2417	1.23377	1.26824	0.694485	0.733649	0.669153
YAL037C-A	YAL037C-A	0.965863	0.901717	1.01317	1.17211	1.13304	1.18516	1.11034	0.887028	1.01808	1.05403
YAL038W	CDC19	0.36648	0.380425	0.432674	0.729782	0.632261	0.722852	0.650639	0.674344	0.710402	0.633657
YAL039C	CYC3	0.842757	0.774398	0.654734	0.757541	0.912848	0.871918	0.862739	0.828099	1.01195	1.17415
YAL040C	CLN3	0.478119	0.312098	0.4024	0.600628	0.640997	0.704659	0.506792	0.857712	0.968487	0.925428
YAL041W	CDC24	1.14072	1.05829	0.921785	0.84673	0.94565	0.930972	1.02742	0.782539	0.819849	0.897612
YAL042W	ERV46	1.41738	1.38161	0.993509	0.909936	0.921488	0.987997	0.941562	0.787273	0.882149	0.920058
YAL043C	PTA1	1.41738	1.38161	0.993509	0.909936	0.921488	0.987997	0.941562	0.827785	0.942452	1.02941
YAL044C	GCV3	1.19131	1.08218	1.13151	1.04344	1.07354	1.03262	1.02856	1.11414	1.01716	1.11657
YAL044W-A	YAL044W-A	1.62927	1.52849	1.34874	1.20759	1.49191	1.42041	1.34457	0.321571	0.331024	0.567595
YAL046C	YAL046C	1.62927	1.52849	1.34874	1.20759	1.49191	1.42041	1.34457	0.772264	0.871479	0.948488
YAL047C	SPC72	1.24658	1.18539	1.12978	1.01831	1.15394	1.02763	1.12765	0.878708	0.876923	1.08309
YAL048C	GEM1	0.906416	0.875888	0.943423	1.0707	1.1183	0.966589	0.991279	0.922545	0.871089	0.918654
YAL049C	YAL049C	1.04332	0.938279	0.972738	1.02966	1.13214	1.04699	1.0307	0.881928	0.973618	0.9904
YAL051W	OAF1	0.701128	0.672496	0.712195	0.745684	0.939857	0.830327	0.8804	0.917516	0.95059	1.02711
YAL053W	FLC2	0.416233	0.374043	0.440549	0.432094	0.487255	0.476153	0.477211	1.02523	1.13444	1.12506
YAL054C	ACS1	0.416233	0.374043	0.440549	0.432094	0.487255	0.476153	0.477211	0.835037	0.897875	0.900944
YAL055W	PEX22	0.809402	0.800464	0.802742	0.813651	0.958494	1.00361	0.910617	0.97709	1.10231	1.24169
YAL056W	GPB2	1.02977	1.00927	0.91805	0.986544	1.01499	0.999623	0.974164	1.0748	1.16658	1.02354
YAL058W	CNE1	0.884417	0.836828	0.859991	0.985207	0.891014	0.923801	0.984808	1.08851	1.30126	1.2569
YAL059W	ECM1	0.819713	0.761538	0.96784	0.983452	1.09974	1.01794	1.09465	1.07268	1.15872	1.10835
YAL060W	BDH1	0.931162	0.853513	0.817586	0.84552	0.97667	1.03356	0.993949	0.890754	0.904834	1.02533
YAL061W	YAL061W	1.02838	0.848521	0.750428	0.755429	0.843072	0.840628	0.932332	1.08195	1.13587	1.20525
YAL062W	GDH3	0.513936	0.488522	0.643376	0.701575	0.780848	0.721029	0.855035	0.770511	0.929987	1.00485
YAL063C	FLO9	0.950592	0.847466	1.01598	1.18919	1.11452	1.04305	1.09021	0.80703	0.755496	0.755705
YAL063C-A	YAL063C-A	0.781279	0.816525	0.858281	0.916342	0.889965	0.903454	0.815244	0.524772	0.711018	0.643539
YAL064C-A	YAL064C-A	0.809173	0.828507	0.759524	0.731409	0.81637	0.798827	0.771021	0.569767	0.779698	0.879533
YAL064W	YAL064W	0.405518	0.379103	0.404433	0.513508	0.52216	0.555232	0.429469	0.863615	0.922453	1.04472
YAL064W-B	YAL064W-B	1.08855	1.16514	0.982312	0.847328	0.794274	0.870596	0.870117	0.555567	0.661423	0.581547
YAL065C	YAL065C	0.715506	0.684694	0.710496	0.670284	0.603061	0.688466	0.696638	0.688313	0.763136	0.938157
YAL067W-A	YAL067W-A	0.931107	0.959173	0.966127	1.00356	1.02007	1.09744	1.04968	0.658886	0.821172	0.700393
YAL068C	PAU8	0.931107	0.959173	0.966127	1.00356	1.02007	1.09744	1.04968	0.644835	0.801447	0.769878
YAR002C-A	ERP1	0.960819	0.941521	0.932128	1.03324	1.01647	1.03512	1.02937	0.791917	0.842845	0.818462
YAR002W	NUP60	0.776013	0.693353	0.788985	0.819292	0.954039	0.942231	0.929408	1.23908	1.20611	1.36697
YAR003W	SWD1	0.960819	0.941521	0.932128	1.03324	1.01647	1.03512	1.02937	0.726348	0.961521	0.8959
YAR007C	RFA1	1.25513	1.20062	1.16379	1.20283	1.29987	1.20184	1.18984	0.613403	0.669641	0.88794
YAR008W	SEN34	1.25513	1.20062	1.16379	1.20283	1.29987	1.20184	1.18984	0.837739	0.966139	0.889064
YAR014C	BUD14	1.25997	1.18933	1.17124	1.19462	1.21493	1.19402	1.22601	0.848535	0.951413	0.892823
YAR015W	ADE1	1.25997	1.18933	1.17124	1.19462	1.21493	1.19402	1.22601	0.834868	0.969429	1.0662
YAR018C	KIN3	0.909442	0.968461	0.910096	1.07937	1.11307	1.11233	1.02792	0.459587	0.582955	0.596966
YAR019C	CDC15	1.60334	1.41248	1.25214	1.26033	1.27471	1.37636	1.31363	0.871066	1.07555	1.05043
YAR023C	YAR023C	1.07523	1.0343	1.0265	1.17247	1.15912	1.08289	1.1729	0.812854	0.879507	0.790259
YAR027W	UIP3	0.891152	0.741496	0.687774	0.88057	0.983904	0.934125	0.904001	0.872498	1.13806	1.18062
YAR028W	YAR028W	1.16181	1.01838	0.946627	0.964164	1.05909	1.06755	1.14883	1.08127	1.08136	1.15122
YAR029W	YAR029W	0.964968	0.967746	1.0921	1.11087	1.15994	1.02596	1.08125	0.645177	0.804628	0.783238
YAR031W	PRM9	1.19563	1.10388	1.19163	1.25997	1.26489	1.18968	1.22167	0.611982	0.726853	0.73362
YAR033W	MST28	1.10124	1.12472	1.0132	1.09413	1.23967	1.11449	1.09346	0.733457	0.72526	0.840354
YAR035C-A	YAR035C-A	0.842894	0.779188	0.780933	0.737358	0.75043	0.764707	0.778145	0.879929	1.00558	1.19644
YAR035W	YAT1	0.866948	0.974297	1.01683	1.01438	1.18324	1.008	0.981319	0.323562	0.434523	0.34672
YAR042W	SWH1	0.842894	0.779188	0.780933	0.737358	0.75043	0.764707	0.778145	0.837748	1.08417	1.00102
YAR050W	FLO1	0.928731	0.83475	0.864941	1.00378	0.867334	0.996897	0.841327	0.821908	1.01912	0.814342
YBL001C	ECM15	0.760178	0.684584	0.612029	0.642951	0.90793	0.716043	0.888999	1.15394	1.08698	1.03442
YBL002W	HTB2	0.475892	0.422911	0.417894	0.500722	0.61362	0.5855	0.578113	1.01383	1.09677	1.20672
YBL003C	HTA2	0.320115	0.312289	0.293688	0.362909	0.426942	0.405358	0.43673	1.046	1.096	1.20483
YBL004W	UTP20	0.854103	0.820381	0.733751	0.812241	0.899896	0.806679	0.927288	0.705798	0.760445	0.755735
YBL005W	PDR3	1.18109	1.07734	0.882734	0.928637	1.06341	1.01548	0.98826	0.907624	0.946627	0.818732
YBL006C	LDB7	1.18109	1.07734	0.882734	0.928637	1.06341	1.01548	0.98826	0.958474	1.04111	1.05154
YBL007C	SLA1	1.04976	0.988613	0.823043	0.794472	1.00304	0.942236	0.975684	0.805539	0.94012	0.863517
YBL008W	HIR1	1.03957	0.973028	0.976993	1.09682	1.03355	1.05919	1.04113	0.755528	0.893985	0.857211
YBL009W	YBL009W	1.00008	1.00844	0.997403	0.974234	1.08013	1.03923	0.983793	0.644688	0.707053	0.792046
YBL010C	YBL010C	1.00008	1.00844	0.997403	0.974234	1.08013	1.03923	0.983793	0.78491	0.894031	0.880325
YBL011W	SCT1	0.63931	0.600313	0.550052	0.520208	0.646376	0.588176	0.646137	0.819087	0.992946	1.07636
YBL013W	FMT1	0.951338	0.918513	0.759899	0.752336	0.959773	0.783306	0.946759	0.808686	0.84979	0.88204
YBL014C	RRN6	0.951338	0.918513	0.759899	0.752336	0.959773	0.783306	0.946759	0.879472	0.965621	1.16343
YBL015W	ACH1	1.40001	1.32949	1.11865	1.04535	1.22742	1.15924	1.17739	0.78026	0.905816	0.832769
YBL016W	FUS3	0.734702	0.609108	0.724389	0.80477	0.972372	0.859393	0.996878	0.858662	0.87912	1.10006
YBL017C	PEP1	0.79784	0.618696	0.594068	0.713919	0.816109	0.738148	0.927123	1.08962	1.06985	1.14953
YBL018C	POP8	1.00056	0.848872	0.861944	0.957055	1.02172	1.03093	0.884069	1.16387	1.0963	1.25549
YBL019W	APN2	0.982744	0.849696	0.959623	1.10918	1.12113	0.95715	0.921908	0.792058	0.982299	0.936555
YBL020W	RFT1	1.19832	1.26935	1.02789	0.949639	1.01799	1.03976	1.07061	0.712641	0.716057	0.771684
YBL021C	HAP3	1.19832	1.26935	1.02789	0.949639	1.01799	1.03976	1.07061	0.598852	0.744133	0.71659
YBL022C	PIM1	1.21693	1.18739	0.93995	0.882157	0.999278	1.02677	1.06057	0.766603	0.870314	1.15449
YBL023C	MCM2	0.770232	0.733702	0.829595	0.900278	0.896307	0.862616	0.868734	0.909691	0.953526	1.06192
YBL024W	NCL1	0.847105	0.77845	0.822116	0.869974	1.02922	0.943819	0.904001	0.849347	0.914556	1.11867
YBL025W	RRN10	0.789364	0.78643	0.829371	1.01147	1.07736	0.98055	1.04612	0.636898	0.933575	0.918876
YBL026W	LSM2	0.921842	0.859223	0.904732	0.90802	1.13629	0.894706	1.02946	0.883002	1.12966	1.07726
YBL027W	RPL19B	0.431797	0.424458	0.448736	0.456256	0.549161	0.547047	0.563976	0.914457	1.07219	0.934089
YBL028C	YBL028C	0.431797	0.424458	0.448736	0.456256	0.549161	0.547047	0.563976	0.914457	1.07219	0.934089
YBL029C-A	YBL029C-A	0.331844	0.301126	0.280534	0.416111	0.332338	0.445722	0.305837	0.786238	0.918233	0.921276
YBL029W	YBL029W	0.532498	0.462472	0.510972	0.611893	0.530582	0.741195	0.564099	0.995462	1.02982	1.2024
YBL030C	PET9	0.508247	0.51079	0.490221	0.458931	0.624111	0.516383	0.557063	0.500837	0.81634	1.00765
YBL031W	SHE1	0.651232	0.607363	0.649319	0.7439	0.796132	0.72974	0.746134	0.840764	0.876841	0.978176
YBL032W	HEK2	0.687567	0.663052	0.569947	0.496105	0.579342	0.527228	0.68527	0.852155	0.912019	1.03857
YBL033C	RIB1	0.687567	0.663052	0.569947	0.496105	0.579342	0.527228	0.68527	0.852155	0.912019	1.03857
YBL034C	STU1	0.906781	0.845182	0.857826	0.885492	0.843457	0.825758	0.931397	1.11521	0.944041	0.978338
YBL035C	POL12	0.673396	0.713279	0.707733	0.834011	0.928331	0.801812	0.892179	0.598852	0.744133	0.71659
YBL036C	YBL036C	0.834993	0.857647	0.721694	0.826642	0.904289	0.878859	0.815498	0.697902	0.838994	0.903884
YBL037W	APL3	0.747584	0.775762	0.761302	0.904351	0.813933	0.860947	0.856474	0.650862	0.771655	0.731712
YBL038W	MRPL16	0.617968	0.627239	0.577733	0.650292	0.628268	0.641218	0.719066	0.395837	0.491876	0.800414
YBL039C	URA7	0.617968	0.627239	0.577733	0.650292	0.628268	0.641218	0.719066	0.550547	0.584861	0.699464
YBL039W-B	YBL039W-B	0.953671	0.909815	0.80647	0.953939	0.934331	1.03335	0.988456	0.895277	0.945995	0.934157
YBL040C	ERD2	0.953671	0.909815	0.80647	0.953939	0.934331	1.03335	0.988456	0.758967	0.759428	0.718862
YBL041W	PRE7	0.855964	0.825327	0.737111	0.805251	0.961155	0.80172	0.932564	0.814495	0.865222	0.800865
YBL042C	FUI1	0.405852	0.411432	0.42858	0.537552	0.553081	0.755258	0.571035	0.674555	0.812393	0.692118
YBL043W	ECM13	0.450769	0.335028	0.339943	0.424289	0.388846	0.389958	0.362995	0.901854	1.03492	1.02448
YBL045C	COR1	0.449222	0.331557	0.336936	0.421281	0.384689	0.386893	0.359019	0.633226	0.863294	0.915755
YBL046W	PSY4	0.875957	0.868676	0.823805	0.861454	0.891	0.851262	0.968796	0.649562	0.851606	0.984966
YBL047C	EDE1	0.875957	0.868676	0.823805	0.861454	0.891	0.851262	0.968796	0.64636	0.856202	0.982585
YBL049W	MOH1	0.880124	0.962556	0.903583	0.849221	0.840208	0.904841	0.847603	0.659252	0.726262	0.7036
YBL050W	SEC17	0.904528	0.911022	0.81512	0.897527	1.04509	0.881729	0.949283	0.835605	0.929239	0.92429
YBL051C	PIN4	0.904528	0.911022	0.81512	0.897527	1.04509	0.881729	0.949283	0.835605	0.929239	0.92429
YBL052C	SAS3	0.647161	0.659389	0.810654	0.859158	0.942878	0.970851	0.872784	0.578811	0.893042	0.859668
YBL054W	YBL054W	0.861237	0.888486	0.797918	0.788693	0.862815	0.786546	0.759286	0.470433	0.62613	0.634438
YBL055C	YBL055C	0.960383	0.869115	0.632126	0.790009	0.727285	0.80001	0.716382	0.980966	1.04891	1.11008
YBL056W	PTC3	0.914957	0.83562	0.797659	0.865291	0.938817	0.951429	0.937054	0.964026	1.23373	1.19124
YBL057C	PTH2	0.914957	0.83562	0.797659	0.865291	0.938817	0.951429	0.937054	0.641565	0.86871	0.777987
YBL058W	SHP1	0.900676	0.922441	0.832248	0.845608	0.948087	0.782783	0.867556	0.761129	0.844445	0.759725
YBL059C-A	YBL059C-A	1.20285	1.13159	1.03889	1.12373	1.34642	1.18397	1.18471	0.740761	0.882621	0.896743
YBL059W	YBL059W	1.20285	1.13159	1.03889	1.12373	1.34642	1.18397	1.18471	0.930063	0.983577	0.873318
YBL060W	YBL060W	1.19543	1.17914	1.01976	0.99862	1.11332	1.10065	1.00589	0.691097	0.745089	0.879037
YBL061C	SKT5	0.925121	0.870407	0.892762	0.95986	1.13068	1.09731	1.12248	0.668105	0.850405	0.79534
YBL063W	KIP1	1.14276	1.11107	1.05361	1.01055	0.938368	1.01292	1.06072	0.698524	0.881164	0.775374
YBL064C	PRX1	0.68947	0.719054	0.694773	0.713674	0.851965	0.739658	0.906426	0.510954	0.706814	0.650354
YBL067C	UBP13	0.648212	0.53652	0.660517	0.720621	0.828131	0.798728	0.75583	0.936646	1.13552	1.14983
YBL068W	PRS4	0.852477	0.799124	0.903116	0.852144	0.930838	0.98072	0.987501	0.981048	1.07157	1.20778
YBL069W	AST1	0.886018	0.947214	0.903836	0.868546	1.05762	0.917911	1.02898	0.446703	0.584731	0.582139
YBL071C-B	YBL071C-B	0.550306	0.539652	0.495023	0.479157	0.598732	0.580523	0.607848	0.587129	0.641648	0.866517
YBL071W-A	KTI11	0.540795	0.529484	0.487591	0.473051	0.590754	0.574411	0.601409	0.770147	0.862238	0.819567
YBL072C	RPS8A	0.391759	0.372764	0.443302	0.436793	0.549429	0.581059	0.634874	0.835688	1.05644	0.906571
YBL074C	AAR2	0.815228	0.791192	0.570551	0.649813	0.914995	0.771954	0.757304	0.746928	0.937135	0.955652
YBL075C	SSA3	1.15044	1.11273	0.97957	1.11204	0.999387	1.05372	1.02983	0.665273	0.857492	1.18438
YBL076C	ILS1	0.789887	0.622966	0.64291	0.609312	0.695699	0.669604	0.636342	0.871424	1.08863	1.11078
YBL078C	ATG8	0.785228	0.734282	0.757066	0.814496	0.899637	0.756934	0.81211	1.07054	1.22533	0.988557
YBL079W	NUP170	0.811602	0.728137	0.676092	0.767749	0.834132	0.813542	0.756525	0.786944	0.946292	0.9966
YBL080C	PET112	0.969409	0.950546	0.923095	0.87377	0.953321	0.92623	0.923473	0.914579	1.01449	1.00044
YBL081W	YBL081W	1.03867	0.946676	0.849525	0.887002	0.859474	0.892551	0.848169	0.180159	0.288513	0.326888
YBL082C	ALG3	1.03867	0.946676	0.849525	0.887002	0.859474	0.892551	0.848169	0.513154	0.653433	0.819641
YBL084C	CDC27	1.01569	1.00394	0.882343	0.861113	0.962015	0.946578	0.996419	0.689335	0.76056	0.81482
YBL085W	BOI1	0.896613	0.735759	0.712258	0.779609	0.957048	0.839522	0.83906	1.09319	1.03512	1.01456
YBL086C	YBL086C	0.934865	0.870126	1.00099	0.968404	1.02929	1.02858	1.05772	0.965701	0.89297	0.972343
YBL087C	RPL23A	0.465476	0.411482	0.418389	0.475304	0.569459	0.529223	0.53281	0.904931	0.890555	1.27906
YBL088C	TEL1	1.0428	0.892584	0.902732	1.06435	1.12648	1.20355	1.09405	1.05758	1.04479	1.19986
YBL089W	AVT5	1.22765	0.978609	0.859365	0.891133	0.92786	0.904218	0.884924	1.0741	1.089	1.32155
YBL090W	MRP21	0.893964	0.851126	0.9886	1.00921	1.14705	1.21043	1.12061	0.731048	0.78499	0.766587
YBL091C	MAP2	0.893964	0.851126	0.9886	1.00921	1.14705	1.21043	1.12061	0.833125	1.00304	0.898095
YBL091C-A	SCS22	1.2033	1.17673	0.954951	0.997643	0.989622	1.0314	1.02132	1.04568	1.14308	1.11528
YBL092W	RPL32	0.484707	0.425957	0.437325	0.470015	0.578785	0.542143	0.626357	1.03333	1.17762	1.17339
YBL093C	ROX3	0.484707	0.425957	0.437325	0.470015	0.578785	0.542143	0.626357	1.13582	1.22238	1.16755
YBL095W	YBL095W	0.736037	0.691406	0.675961	0.622965	0.682601	0.695799	0.732564	1.00814	1.15473	1.10717
YBL097W	BRN1	0.540338	0.538274	0.588766	0.641419	0.679784	0.714414	0.707455	0.658964	0.786032	1.02544
YBL098W	BNA4	0.630078	0.541925	0.658752	0.697282	0.722225	0.759005	0.666768	0.727998	0.9545	0.890466
YBL099W	ATP1	0.550441	0.45576	0.458654	0.420466	0.600647	0.509543	0.543488	0.428483	0.669633	0.580376
YBL100W-C	YBL100W-C	0.953605	0.723429	0.739406	0.852939	0.975315	1.00236	1.02778	1.1149	1.1182	1.33494
YBL101C	ECM21	0.892641	0.65789	0.654599	0.710781	0.81019	0.853527	0.844858	0.876986	1.15234	1.17041
YBL102W	SFT2	0.982743	0.741046	0.706701	0.851798	0.899725	0.82413	0.827376	1.11313	1.13328	1.07646
YBL103C	RTG3	0.982743	0.741046	0.706701	0.851798	0.899725	0.82413	0.827376	0.792982	0.771699	0.766123
YBL104C	YBL104C	0.967279	0.823078	0.92809	0.914468	1.00074	0.951717	0.968927	0.936305	1.25588	1.25734
YBL105C	PKC1	0.920882	0.963969	0.863378	0.973313	0.948935	0.912881	0.942956	0.521082	0.715089	0.655059
YBL107C	YBL107C	0.90238	0.828396	0.856807	0.819901	0.920609	0.925011	0.875586	0.996856	1.04717	1.05502
YBL108C-A	PAU9	0.405728	0.407708	0.413577	0.390752	0.438386	0.419293	0.414026	0.599469	0.721127	0.842474
YBR001C	NTH2	0.512343	0.458522	0.573737	0.626858	0.761455	0.642028	0.616448	1.04087	0.967481	1.03664
YBR002C	RER2	1.10523	0.981377	0.973333	0.852576	0.976368	0.922808	1.02223	0.916732	0.949196	1.01677
YBR003W	COQ1	1.10523	0.981377	0.973333	0.852576	0.976368	0.922808	1.02223	0.916732	0.949196	1.01677
YBR004C	GPI18	1.03436	0.863268	0.786288	0.960002	1.0119	1.03764	0.964684	0.940782	1.08558	1.13416
YBR005W	RCR1	1.03436	0.863268	0.786288	0.960002	1.0119	1.03764	0.964684	1.02549	1.06524	1.2422
YBR006W	UGA2	0.773378	0.744855	0.740082	0.878264	0.948846	0.881558	0.869303	1.06923	1.10676	1.10897
YBR007C	DSF2	1.00176	0.919791	0.958283	0.966113	1.17935	1.00779	1.13488	0.99699	1.11464	1.00538
YBR008C	FLR1	0.608325	0.588966	0.596332	0.671359	0.796072	1.19797	0.742496	0.958426	0.998673	1.1917
YBR011C	IPP1	1.12016	0.984545	0.968909	0.938294	1.09122	0.90595	0.956867	1.06282	1.08652	1.23104
YBR013C	YBR013C	0.532022	0.473689	0.517369	0.587977	0.618415	0.641507	0.626907	1.13176	1.20811	1.05444
YBR014C	YBR014C	0.87409	0.702294	0.851595	0.918525	1.02636	0.874643	1.00029	1.15026	1.09406	1.32385
YBR015C	MNN2	1.20286	1.16589	0.983197	0.940805	0.918048	1.02399	0.991927	0.848894	0.996626	1.04723
YBR016W	YBR016W	1.2024	1.05885	0.881123	0.787651	0.93591	0.927691	0.968798	0.864345	0.951736	0.851927
YBR017C	KAP104	0.793963	0.76938	0.862367	1.00387	0.975995	0.922698	0.965969	0.588149	0.919478	0.80245
YBR018C	GAL7	0.8259	0.821283	0.946591	0.919071	1.08593	0.902791	0.986287	0.446935	0.559264	0.75345
YBR019C	GAL10	0.703363	0.655048	0.739619	0.73832	0.848035	0.753636	0.732329	0.805255	0.848018	1.0439
YBR020W	GAL1	0.703363	0.655048	0.739619	0.73832	0.848035	0.753636	0.732329	0.580986	0.772405	0.889681
YBR021W	FUR4	0.631607	0.5892	0.607556	0.603547	0.708446	0.66656	0.686769	0.812881	0.93932	1.15726
YBR023C	CHS3	1.12875	1.1208	1.00169	1.00295	1.01378	1.08191	1.01622	0.864985	0.933156	0.978951
YBR024W	SCO2	1.07392	1.00509	0.98482	1.00541	1.17446	1.14881	1.0565	0.761428	0.897666	1.03768
YBR025C	YBR025C	0.753953	0.759806	0.640472	0.697405	0.863869	0.7692	0.78669	0.699064	0.794656	0.929155
YBR026C	ETR1	0.828257	0.733571	0.826389	0.915981	0.899515	1.01256	0.853953	1.00131	0.920649	0.992431
YBR028C	YBR028C	0.508132	0.500563	0.574171	0.622153	0.721836	0.632606	0.679051	0.877125	0.998324	1.21426
YBR029C	CDS1	0.926007	1.03839	0.946294	0.862312	1.032	1.03189	1.07062	0.591255	0.779387	0.749568
YBR030W	YBR030W	0.926007	1.03839	0.946294	0.862312	1.032	1.03189	1.07062	0.591255	0.779387	0.749568
YBR031W	RPL4A	0.743348	0.826252	0.763753	0.706631	0.829302	0.710407	0.76234	0.497332	0.837387	0.761334
YBR033W	EDS1	0.934147	0.889487	0.867058	0.904154	0.926619	0.890205	0.969364	0.929417	0.978107	1.11216
YBR034C	HMT1	0.784798	0.736104	0.769324	0.789893	0.881151	0.796716	0.839079	0.779928	0.9061	0.777734
YBR035C	PDX3	1.05607	0.990752	1.06791	0.972461	1.1857	1.14256	1.21384	0.945991	1.0422	0.971725
YBR036C	CSG2	1.00626	0.910186	0.765696	0.755655	0.91739	0.914292	0.906924	0.80281	0.940123	0.829475
YBR037C	SCO1	0.716995	0.681042	0.633957	0.652664	0.810219	0.702474	0.800065	0.923247	0.974309	0.958537
YBR038W	CHS2	0.716995	0.681042	0.633957	0.652664	0.810219	0.702474	0.800065	0.80089	0.996907	0.811272
YBR039W	ATP3	0.918079	0.875102	0.759626	0.875751	1.0137	1.01001	0.976791	0.971065	1.04882	1.09402
YBR040W	FIG1	0.481746	0.521147	0.748566	0.745205	0.833173	0.805477	0.649452	0.629306	0.804022	0.783261
YBR041W	FAT1	0.66202	0.635768	0.754164	0.773355	0.827803	0.768944	0.77872	1.20596	1.20603	1.2431
YBR042C	YBR042C	0.840982	0.842362	0.835922	0.838719	0.897189	0.819824	0.870021	0.860957	0.97693	1.0277
YBR043C	QDR3	0.83285	0.67146	0.726858	0.771167	0.714657	0.767879	0.713593	0.806447	0.931724	0.843706
YBR044C	TCM62	0.887512	0.756851	0.785161	0.762698	0.967727	0.87742	0.94907	1.20468	1.20633	1.13458
YBR045C	GIP1	0.626275	0.559051	0.678634	0.827224	0.752752	0.668023	0.716223	0.933537	0.91699	1.08315
YBR046C	ZTA1	1.07232	0.725639	0.815528	0.949629	0.971187	0.903294	0.94433	0.781246	0.886879	0.885092
YBR047W	FMP23	1.07232	0.725639	0.815528	0.949629	0.971187	0.903294	0.94433	0.836178	1.03224	0.980404
YBR048W	RPS11B	0.527143	0.468708	0.527137	0.596928	0.705983	0.59769	0.6803	0.750323	0.715017	0.905032
YBR049C	REB1	0.795607	0.795817	0.685398	0.691408	0.790982	0.734525	0.773367	0.783054	0.910708	0.927323
YBR050C	REG2	1.05687	1.02482	0.862827	0.933009	0.96234	0.989736	1.01385	0.861718	0.90036	1.07929
YBR052C	RFS1	0.959888	0.889081	0.825272	0.825406	1.04556	0.93354	0.99121	0.798983	0.84789	1.15247
YBR053C	YBR053C	0.923403	0.823128	0.835431	0.951263	1.0632	0.952248	1.11587	0.779219	0.924622	1.02706
YBR054W	YRO2	0.47844	0.374356	0.402084	0.796275	0.758314	0.727904	0.632136	0.903026	1.12866	1.31805
YBR055C	PRP6	0.450375	0.393624	0.449717	0.553391	0.619762	0.641706	0.607592	0.766321	0.914679	0.931943
YBR056W	YBR056W	0.450375	0.393624	0.449717	0.553391	0.619762	0.641706	0.607592	1.18814	1.19237	1.22619
YBR057C	MUM2	0.60557	0.562453	0.541861	0.633312	0.651847	0.657557	0.603452	1.0976	1.24418	0.995821
YBR058C	UBP14	0.926059	0.860446	0.9591	1.10866	1.06898	1.01902	1.02779	0.88951	1.02745	0.912609
YBR058C-A	TSC3	0.923945	0.83123	0.75905	0.850066	0.913845	0.898956	0.930659	0.732734	0.823353	0.867656
YBR059C	AKL1	0.694423	0.600485	0.579459	0.574364	0.687835	0.698535	0.741906	0.856317	1.03411	1.09874
YBR060C	ORC2	0.820633	0.778043	0.873266	0.789297	0.828432	0.840625	0.855926	0.98039	1.07225	1.11207
YBR061C	TRM7	0.841383	0.859888	0.920364	0.972543	1.06672	0.953867	0.970213	0.462085	0.616277	0.558671
YBR062C	YBR062C	0.923107	0.971438	0.980265	0.958552	1.06002	1.0997	1.13223	0.322783	0.50611	0.45498
YBR063C	YBR063C	0.667323	0.729552	0.749715	0.794915	0.891798	0.80965	0.835084	0.533931	0.63087	0.630281
YBR065C	ECM2	0.70417	0.748948	0.665194	0.666372	0.856099	0.71529	0.780863	0.401158	0.603878	0.566013
YBR066C	NRG2	0.457055	0.329839	0.360129	0.466148	0.609873	0.527516	0.644989	0.624681	0.845665	0.856569
YBR068C	BAP2	0.300106	0.312082	0.324396	0.284895	0.324252	0.387603	0.365118	0.447495	0.531775	0.615963
YBR069C	TAT1	0.512597	0.635974	0.648377	0.629453	0.764365	0.663072	0.709531	0.522016	0.574403	0.672141
YBR070C	ALG14	0.784341	0.787636	0.641014	0.751134	0.861677	0.932255	0.966188	0.851633	0.940539	1.08616
YBR071W	YBR071W	0.785203	0.788808	0.641477	0.752136	0.863761	0.932926	0.967676	0.743615	0.818742	0.846575
YBR072C-A	YBR072C-A	0.724384	0.709687	0.722266	0.703309	0.871671	0.826296	0.810455	0.69644	0.671181	0.848442
YBR072W	HSP26	1.24038	1.17786	1.14536	1.15018	1.26186	1.14441	1.06529	1.05623	1.0876	1.0135
YBR073W	RDH54	0.724384	0.709687	0.722266	0.703309	0.871671	0.826296	0.810455	0.816642	0.872618	0.897516
YBR074W	YBR074W	0.718523	0.729048	0.687171	0.736466	0.84878	0.798027	0.790472	0.770988	0.874578	1.025
YBR076W	ECM8	0.943594	0.927322	0.897843	0.838751	0.95574	0.897621	0.994181	0.62317	1.03686	0.935625
YBR077C	SLM4	0.45045	0.449606	0.410744	0.433424	0.499398	0.484278	0.481512	0.765513	0.86551	0.968536
YBR078W	ECM33	0.44908	0.452113	0.41507	0.440938	0.505978	0.49286	0.489632	0.858492	0.836188	0.891442
YBR079C	RPG1	0.768693	0.735183	0.747899	0.790387	0.922482	0.80123	0.754131	0.904755	1.26707	1.10143
YBR080C	SEC18	0.85359	0.712076	0.73318	0.816608	0.857239	0.823546	0.818024	0.897884	0.962426	1.23203
YBR081C	SPT7	0.831153	0.720882	0.928843	1.04667	1.09167	0.980555	1.04546	1.01424	1.02029	1.1907
YBR082C	UBC4	0.641152	0.579071	0.521892	0.595051	0.782971	0.604262	0.729137	1.26491	1.20529	1.10768
YBR083W	TEC1	0.418155	0.324164	0.565787	0.760372	0.842653	0.845383	1.0602	0.924086	1.20093	1.26723
YBR084C-A	RPL19A	0.42645	0.425843	0.432909	0.473	0.543479	0.533376	0.54219	0.63268	0.83677	1.02195
YBR084W	MIS1	0.920237	0.891571	0.815751	0.851746	0.780049	0.861214	0.848881	0.86715	1.01811	1.13056
YBR085C-A	YBR085C-A	0.926402	0.66714	0.55692	0.632651	1.09768	0.756048	1.02548	0.487031	0.549081	0.541518
YBR085W	AAC3	0.42645	0.425843	0.432909	0.473	0.543479	0.533376	0.54219	0.63268	0.83677	1.02195
YBR086C	IST2	0.5993	0.609717	0.58338	0.743495	0.868742	0.755936	0.773191	0.539303	0.61719	0.617502
YBR087W	RFC5	1.03854	0.996533	0.936112	1.03591	1.0674	1.01858	1.15904	0.887542	0.988232	1.05372
YBR088C	POL30	0.721116	0.794178	0.840577	0.863547	1.0407	0.916627	0.868483	0.612252	0.672315	0.72287
YBR089C-A	NHP6B	0.871216	0.766295	0.63517	0.647377	0.766192	0.742902	0.815479	0.825603	0.925498	0.861493
YBR090C	YBR090C	0.815897	0.822303	0.909464	0.812863	0.967218	0.86429	0.926544	0.606897	0.760933	0.84835
YBR091C	MRS5	0.815897	0.822303	0.909464	0.812863	0.967218	0.86429	0.926544	0.692592	0.939906	1.00601
YBR092C	PHO3	0.649527	0.682954	0.755258	0.875094	0.870953	0.927501	0.828738	0.559267	0.678319	0.615562
YBR093C	PHO5	1.19905	1.1596	1.0156	1.10466	1.1475	1.13583	1.13069	0.866288	1.08506	1.04273
YBR094W	YBR094W	0.859042	0.852122	0.846885	0.994648	0.95289	0.989806	0.979438	0.644159	0.790206	0.757307
YBR095C	RXT2	0.996527	0.904929	0.84699	1.07523	1.14642	1.04456	1.01435	0.801267	1.00577	1.18115
YBR096W	YBR096W	0.996527	0.904929	0.84699	1.07523	1.14642	1.04456	1.01435	1.10515	1.16776	1.11392
YBR097W	VPS15	0.88028	0.872901	0.956125	0.921286	1.0804	1.02038	1.03952	0.8488	0.969796	0.8919
YBR098W	MMS4	0.900908	0.839733	0.912321	0.955912	1.05689	0.963014	0.974117	0.804874	0.875094	0.959168
YBR101C	FES1	0.818029	0.784534	0.613491	0.745147	0.816135	0.758309	0.782347	0.732562	0.884799	0.842101
YBR102C	EXO84	0.969824	0.953984	1.02092	1.0745	1.29093	1.17427	1.1732	0.9843	0.993606	1.04588
YBR103W	SIF2	0.969824	0.953984	1.02092	1.0745	1.29093	1.17427	1.1732	0.9843	0.993606	1.04588
YBR104W	YMC2	0.747176	0.633875	0.596872	0.666334	0.789736	0.689277	0.855863	0.722305	0.833797	0.954261
YBR105C	VID24	0.509353	0.502762	0.462847	0.483983	0.508295	0.464918	0.521454	0.982792	1.09697	1.14631
YBR106W	PHO88	0.509353	0.502762	0.462847	0.483983	0.508295	0.464918	0.521454	0.883207	1.02022	1.06613
YBR107C	IML3	1.03312	0.981526	0.914101	0.944182	1.07273	1.06258	1.02613	0.830895	0.824524	0.812496
YBR108W	YBR108W	1.03312	0.981526	0.914101	0.944182	1.07273	1.06258	1.02613	0.901712	0.902574	1.14371
YBR109C	CMD1	0.832179	0.750404	0.723326	0.745499	0.902774	0.804915	0.877161	0.949176	1.12576	1.01956
YBR110W	ALG1	0.832179	0.750404	0.723326	0.745499	0.902774	0.804915	0.877161	0.800532	0.975751	1.09422
YBR111C	YSA1	1.10608	0.852784	0.8843	0.906461	1.23192	1.05972	1.06719	0.986004	1.01289	1.08664
YBR111W-A	SUS1	1.10608	0.852784	0.8843	0.906461	1.23192	1.05972	1.06719	0.917661	0.986487	0.76455
YBR112C	CYC8	0.438398	0.410653	0.427526	0.559905	0.554639	0.610379	0.477668	0.982337	1.13478	1.15751
YBR114W	RAD16	0.843677	0.811068	0.788203	0.818793	0.960563	0.795504	0.922781	0.862152	0.913519	0.957855
YBR117C	TKL2	1.05285	0.87858	0.87261	0.943045	1.02539	0.898359	0.905826	0.918032	0.918241	1.07378
YBR118W	TEF2	0.254137	0.257516	0.356832	0.31401	0.456196	0.360732	0.428409	0.722123	0.801206	0.957945
YBR120C	CBP6	0.702217	0.737936	0.667831	0.689498	0.835481	0.792539	0.800794	0.501443	0.679467	0.478402
YBR121C	GRS1	0.916108	0.719679	0.801407	0.902578	0.851225	0.964719	0.928748	0.648689	1.00365	1.26233
YBR122C	MRPL36	0.893083	0.85477	0.882649	0.915897	0.956741	0.881395	0.881647	0.805683	0.999287	1.04156
YBR123C	TFC1	0.695783	0.640558	0.754286	0.714882	0.756345	0.788593	0.788419	0.712624	0.90556	0.961208
YBR125C	PTC4	0.715162	0.567577	0.653222	0.650602	0.763016	0.757555	0.792346	0.999502	1.11237	1.1312
YBR126C	TPS1	0.981885	0.742287	0.610138	0.490602	0.728875	0.754887	0.727087	0.782115	1.20203	1.04011
YBR127C	VMA2	1.08695	0.953369	0.816353	0.799285	0.849865	0.897178	0.886083	0.86014	0.98454	1.03807
YBR128C	ATG14	0.752033	0.706392	0.785278	0.864693	0.939785	0.865113	0.923054	0.819342	1.18153	1.05184
YBR129C	OPY1	1.0938	0.982599	0.840095	0.994849	1.05254	1.03696	0.945652	0.919539	0.958065	1.07472
YBR130C	SHE3	1.15066	1.05537	0.917222	0.909001	0.991711	0.954044	0.948486	1.21608	1.09876	1.10711
YBR131W	CCZ1	1.15066	1.05537	0.917222	0.909001	0.991711	0.954044	0.948486	1.21608	1.09876	1.10711
YBR132C	AGP2	0.99945	0.870661	0.792507	0.780493	0.974142	0.956398	0.927858	1.09922	1.0448	1.27718
YBR133C	HSL7	0.73744	0.782066	0.606696	0.606806	0.718284	0.64744	0.677082	0.591753	0.679006	0.7653
YBR135W	CKS1	0.73744	0.782066	0.606696	0.606806	0.718284	0.64744	0.677082	0.769435	0.850323	0.848768
YBR136W	MEC1	0.746981	0.765178	0.785526	0.852744	0.903321	0.813547	0.764478	0.376665	0.577972	0.666592
YBR137W	YBR137W	0.886598	0.773226	0.788947	0.777579	0.862592	0.802849	0.901021	0.798666	0.990709	0.831373
YBR138C	YBR138C	0.837596	0.815129	0.761241	0.873558	0.908362	0.891834	0.820636	0.644663	0.807635	0.826627
YBR139W	YBR139W	0.837596	0.815129	0.761241	0.873558	0.908362	0.891834	0.820636	0.749341	0.939691	0.958552
YBR140C	IRA1	0.896961	0.866848	0.807733	0.800355	0.92615	0.86507	0.83822	0.793333	0.852344	0.891879
YBR141C	YBR141C	0.877525	0.886971	0.891291	0.895708	1.01888	1.03046	1.02192	0.741979	0.810989	0.782713
YBR142W	MAK5	0.877525	0.886971	0.891291	0.895708	1.01888	1.03046	1.02192	0.729516	0.911269	0.986606
YBR143C	SUP45	0.657086	0.684172	0.747056	0.710155	0.89197	0.857999	0.841077	0.549979	0.692006	0.607704
YBR145W	ADH5	1.05289	0.317974	0.405556	0.574542	0.709303	0.507821	0.767873	0.405142	0.763481	0.896873
YBR146W	MRPS9	0.903295	0.619688	0.696483	0.792059	0.794111	0.765179	0.952086	0.613696	0.782399	0.92895
YBR147W	YBR147W	0.923783	0.68686	0.791729	0.743035	0.905682	0.73985	0.893373	0.695402	0.894456	1.00344
YBR148W	YSW1	0.746607	0.655122	0.817671	0.82334	0.915437	0.906762	0.967364	1.02268	1.09616	1.04592
YBR149W	ARA1	0.822302	0.68761	0.71096	0.66469	0.94353	0.870263	0.853879	1.1045	1.10845	1.14801
YBR150C	TBS1	0.584321	0.538611	0.502924	0.546953	0.660073	0.624031	0.639661	0.869737	0.982056	0.998683
YBR151W	APD1	0.584321	0.538611	0.502924	0.546953	0.660073	0.624031	0.639661	0.869737	0.982056	0.998683
YBR152W	SPP381	0.758346	0.765721	0.868436	0.969614	1.00072	1.01069	1.06984	0.786549	0.831424	0.903947
YBR153W	RIB7	0.866505	0.804646	0.763982	0.823882	0.8433	0.869818	0.834243	0.819196	0.892394	1.15714
YBR154C	RPB5	0.678761	0.735013	0.786749	0.826208	1.02283	0.888499	1.00548	0.551704	0.673202	0.721936
YBR155W	CNS1	0.909339	0.965865	0.949516	0.97508	1.1149	1.0022	1.1153	0.471177	0.603191	0.635023
YBR156C	SLI15	0.553256	0.61147	0.669443	0.78081	0.852013	0.810958	0.864125	0.606495	0.905351	0.859643
YBR158W	AMN1	0.336847	0.338915	0.425773	0.60419	0.600114	0.612524	0.69119	0.665435	0.859207	0.852178
YBR159W	IFA38	0.61805	0.69879	0.693425	0.788132	0.788174	0.813507	0.765825	0.508946	0.610706	0.597034
YBR160W	CDC28	0.448048	0.442208	0.518325	0.609587	0.699801	0.578188	0.655387	0.707372	0.790339	0.804972
YBR161W	CSH1	0.393073	0.379616	0.427457	0.494661	0.564652	0.545472	0.610619	0.886512	1.10026	1.14484
YBR162C	TOS1	0.329279	0.264518	0.359416	0.486807	0.48765	0.507999	0.544698	1.02788	1.12566	1.23909
YBR162W-A	YSY6	0.457038	0.427534	0.353235	0.403432	0.46415	0.473104	0.510666	0.805119	0.930282	1.03992
YBR163W	DEM1	0.867849	0.769494	0.76765	0.740663	0.886779	0.791902	0.878056	1.13607	1.15413	1.0522
YBR164C	ARL1	0.671034	0.612038	0.690545	0.786215	0.875995	0.774344	0.80761	1.25829	1.27356	1.51388
YBR165W	UBS1	0.671034	0.612038	0.690545	0.786215	0.875995	0.774344	0.80761	1.25829	1.27356	1.51388
YBR166C	TYR1	0.81087	0.707065	0.719832	0.758291	0.868265	0.838866	0.789417	1.1992	1.32048	0.974667
YBR167C	POP7	1.06543	1.00454	1.08786	1.1126	1.29744	1.14266	1.14383	0.865458	0.935566	1.08838
YBR168W	PEX32	0.979673	0.946167	1.02619	1.05741	1.23857	1.03084	1.06157	0.95334	1.09113	1.02968
YBR169C	SSE2	0.539615	0.501083	0.584238	0.601631	0.708345	0.70166	0.703382	0.985403	0.926164	0.832752
YBR170C	NPL4	0.825073	0.776822	0.778232	0.779152	0.833969	0.823993	0.851515	1.04841	1.05549	1.02188
YBR171W	SEC66	0.825073	0.776822	0.778232	0.779152	0.833969	0.823993	0.851515	1.21943	1.26286	1.23002
YBR172C	SMY2	0.810469	0.792849	0.761259	0.787724	0.836408	0.828953	0.817441	0.774089	0.845194	0.83138
YBR173C	UMP1	1.16701	1.07214	0.948928	0.965934	1.03857	1.01738	1.1227	0.751366	0.935775	1.10502
YBR175W	SWD3	1.16701	1.07214	0.948928	0.965934	1.03857	1.01738	1.1227	0.717735	0.850424	0.72286
YBR176W	ECM31	0.714218	0.687614	0.720618	0.796291	0.97481	0.790202	0.902651	0.890554	0.859505	1.02487
YBR177C	EHT1	0.480831	0.512653	0.485236	0.593692	0.628975	0.571634	0.616195	0.466574	0.702727	0.50756
YBR179C	FZO1	0.965221	0.895324	0.770297	0.75333	0.885415	0.835123	0.905429	0.854017	0.911026	1.07215
YBR180W	DTR1	0.747432	0.733808	0.752179	0.846796	1.03145	0.838838	0.912745	0.887476	0.960414	0.974691
YBR181C	RPS6B	0.425869	0.41396	0.4293	0.430429	0.556263	0.480066	0.519983	0.625882	0.714405	0.789645
YBR182C	SMP1	1.09617	0.925121	0.837814	1.08334	0.967302	1.01345	0.997028	1.1228	1.08024	1.29738
YBR182C-A	YBR182C-A	0.412042	0.385454	0.397643	0.519582	0.630023	0.537723	0.512595	0.805119	0.930282	1.03992
YBR183W	YPC1	0.412042	0.385454	0.397643	0.519582	0.630023	0.537723	0.512595	1.08163	1.01395	1.05798
YBR184W	YBR184W	0.676703	0.626234	0.766177	0.77627	0.91097	0.844154	0.945687	0.847391	1.02167	0.856249
YBR185C	MBA1	0.991654	0.90814	0.92958	0.941989	1.05668	0.945532	1.00462	0.649271	0.670587	0.837294
YBR186W	PCH2	0.99835	0.938641	1.07933	1.11349	1.31798	1.11142	1.14284	0.891276	0.903213	1.09802
YBR187W	GDT1	0.789167	0.673084	0.692049	0.783645	0.883697	0.821508	0.833708	1.20468	1.20633	1.13458
YBR188C	NTC20	0.771488	0.797483	0.68405	0.706248	0.86621	0.787067	0.825292	0.265981	0.430797	0.470335
YBR189W	RPS9B	0.771488	0.797483	0.68405	0.706248	0.86621	0.787067	0.825292	0.542813	0.702409	0.629593
YBR191W	RPL21A	0.567514	0.472239	0.525204	0.504267	0.65258	0.598396	0.64995	1.20761	1.08913	0.938429
YBR192W	RIM2	0.544226	0.534105	0.596525	0.744235	0.791493	0.662296	0.675674	0.905788	0.919182	0.9035
YBR193C	MED8	1.04772	0.961868	0.903742	1.06042	1.00186	1.08257	1.03025	0.876034	0.91467	0.986508
YBR194W	SOY1	1.04772	0.961868	0.903742	1.06042	1.00186	1.08257	1.03025	1.06014	1.0666	1.09971
YBR195C	MSI1	0.711675	0.636016	0.777885	0.724348	0.865028	0.842475	0.752231	0.825578	1.00578	1.30292
YBR196C	PGI1	0.528465	0.474455	0.497697	0.647517	0.617128	0.691247	0.660946	0.784247	0.785735	0.950603
YBR196C-B	YBR196C-B	0.769161	0.658183	0.575954	0.772585	0.697141	0.826595	0.741277	0.980739	1.10257	1.18223
YBR197C	YBR197C	0.835832	0.89189	0.686807	0.674989	0.979045	0.865226	0.870483	0.567901	0.758419	0.779815
YBR198C	TAF5	0.907801	0.955179	0.782687	0.792882	0.88555	0.918095	0.84665	0.514298	0.463717	0.655784
YBR199W	KTR4	0.907801	0.955179	0.782687	0.792882	0.88555	0.918095	0.84665	0.457721	0.775965	0.845248
YBR200W	BEM1	0.900409	0.777695	0.822008	0.902983	0.918055	0.876108	0.928554	1.12487	1.23708	1.23132
YBR200W-A	YBR200W-A	0.616549	0.578676	0.765755	0.74333	0.735182	0.716287	0.771609	0.749388	0.886037	0.989854
YBR201C-A	YBR201C-A	0.635956	0.411562	0.469029	0.562114	0.58025	0.490742	0.67337	0.831775	0.889274	1.01925
YBR201W	DER1	0.899574	0.88455	0.937853	0.948229	1.0848	0.921528	1.02025	0.780494	0.882867	0.904249
YBR202W	CDC47	0.821225	0.577341	0.555298	0.639268	0.762924	0.582852	0.782262	0.77888	0.962019	1.07294
YBR203W	COS111	0.296633	0.263195	0.3142	0.410169	0.412948	0.400765	0.356333	0.903917	1.00102	1.22668
YBR204C	YBR204C	1.20949	1.17775	0.999076	1.02428	1.04002	1.16465	1.12788	0.865952	0.946274	0.865083
YBR205W	KTR3	1.20949	1.17775	0.999076	1.02428	1.04002	1.16465	1.12788	0.799332	0.798896	0.851387
YBR207W	FTH1	0.931674	0.904784	0.847792	0.890232	1.00998	0.898089	1.04272	0.620135	0.823368	0.786474
YBR208C	DUR1,2	0.993261	0.795944	0.600063	0.709653	0.919508	0.772492	0.863527	0.875327	0.805508	0.801969
YBR210W	ERV15	1.05157	1.00264	0.9171	0.99882	1.06325	0.967234	1.00322	0.7021	0.744103	0.656189
YBR211C	AME1	0.959007	0.935702	0.83895	0.861451	0.997981	0.981056	0.894313	0.836389	0.908532	1.00249
YBR212W	NGR1	0.959007	0.935702	0.83895	0.861451	0.997981	0.981056	0.894313	0.650283	0.774814	0.700379
YBR213W	MET8	0.696278	0.665326	0.735063	0.75973	0.849221	0.751592	0.846577	0.876118	0.930738	0.935193
YBR214W	SDS24	1.17302	1.02649	0.806894	0.79927	0.791595	0.873183	0.900891	1.24813	1.33456	1.49062
YBR215W	HPC2	0.756212	0.723176	0.813919	0.796527	0.916379	0.831666	0.859598	1.02472	1.0353	1.02568
YBR216C	YBP1	1.01044	0.995511	1.03873	1.14711	1.16093	1.10656	1.1515	0.566588	0.727731	0.868549
YBR217W	ATG12	1.01044	0.995511	1.03873	1.14711	1.16093	1.10656	1.1515	0.791004	0.880058	1.02307
YBR218C	PYC2	0.447208	0.307807	0.403023	0.390352	0.527716	0.491656	0.53576	1.16513	1.28609	1.19114
YBR220C	YBR220C	0.707414	0.718505	0.693786	0.791147	0.841859	0.807701	0.752496	0.90221	0.946411	0.87757
YBR221C	PDB1	0.838924	0.727735	0.710285	0.718597	0.817251	0.708149	0.770953	0.899176	1.03134	0.947413
YBR221W-A	YBR221W-A	0.838924	0.727735	0.710285	0.718597	0.817251	0.708149	0.770953	1.04514	1.03468	1.17215
YBR222C	PCS60	0.82372	0.829824	0.696809	0.634374	0.748986	0.74416	0.72283	0.659529	0.879419	1.09788
YBR223C	TDP1	1.15864	1.13003	1.01515	1.04141	1.14539	1.12817	1.12034	0.778555	0.990247	0.94381
YBR225W	YBR225W	1.15864	1.13003	1.01515	1.04141	1.14539	1.12817	1.12034	0.74254	0.96471	0.887297
YBR227C	MCX1	1.02149	0.921103	0.965949	1.08822	1.10688	1.02641	1.15456	1.04998	1.03451	1.06255
YBR228W	SLX1	1.02149	0.921103	0.965949	1.08822	1.10688	1.02641	1.15456	1.05635	1.08327	1.07995
YBR229C	ROT2	0.731059	0.685719	0.725016	0.770406	0.747742	0.748774	0.789713	0.645837	0.866617	0.964875
YBR230C	OM14	0.821003	0.792784	0.614618	0.569587	0.695332	0.75613	0.795336	0.836687	0.905064	1.02214
YBR230W-A	YBR230W-A	0.821003	0.792784	0.614618	0.569587	0.695332	0.75613	0.795336	0.833002	0.963118	0.966805
YBR231C	SWC5	0.941188	1.00324	0.816092	0.933637	0.930833	1.00748	0.986261	0.39616	0.46668	0.636901
YBR233W	PBP2	0.941188	1.00324	0.816092	0.933637	0.930833	1.00748	0.986261	0.459587	0.582955	0.596966
YBR233W-A	DAD3	0.674366	0.657019	0.707097	0.793184	0.771165	0.823133	0.793105	0.824927	1.08591	1.28725
YBR234C	ARC40	1.03577	1.01207	0.883408	0.926511	0.910412	0.953023	0.922665	0.702963	0.688136	0.880669
YBR235W	YBR235W	1.03577	1.01207	0.883408	0.926511	0.910412	0.953023	0.922665	0.855704	0.837025	0.791278
YBR236C	ABD1	0.81573	0.860877	0.844043	0.78546	1.00936	0.935152	1.01493	0.646201	0.688116	0.736065
YBR237W	PRP5	0.81573	0.860877	0.844043	0.78546	1.00936	0.935152	1.01493	0.654852	0.661446	0.818219
YBR238C	YBR238C	0.55634	0.615258	0.536538	0.652796	0.622899	0.688821	0.608899	0.47459	0.507415	0.60049
YBR239C	YBR239C	0.530687	0.453536	0.599433	0.766114	0.830025	0.756679	0.832604	1.07432	1.19072	1.36853
YBR240C	THI2	0.893622	0.814178	0.65477	0.690594	0.757412	0.788597	0.736253	0.944474	1.07098	0.876165
YBR241C	YBR241C	0.690505	0.542551	0.567702	0.598163	0.69585	0.585458	0.674323	1.34037	1.3157	1.34429
YBR242W	YBR242W	0.690505	0.542551	0.567702	0.598163	0.69585	0.585458	0.674323	1.02548	1.03025	0.905388
YBR243C	ALG7	1.03521	0.880256	0.882758	0.934499	1.01501	0.946266	0.948559	0.959531	0.945835	0.951137
YBR244W	GPX2	1.12266	1.07881	1.03965	1.2239	1.10895	1.23023	1.1819	0.874326	1.02372	0.9468
YBR245C	ISW1	0.896589	0.788246	0.837148	1.01136	0.942413	1.04774	0.963018	1.26901	1.32804	1.21566
YBR246W	YBR246W	0.896589	0.788246	0.837148	1.01136	0.942413	1.04774	0.963018	0.966591	1.0263	1.18371
YBR247C	ENP1	0.705482	0.608614	0.748479	0.776304	0.914864	0.79006	0.841196	0.793212	0.865864	0.948017
YBR248C	HIS7	0.845242	0.479818	0.559435	0.643544	0.794814	0.623927	0.837182	0.46773	0.769133	0.995018
YBR249C	ARO4	0.627633	0.331298	0.440101	0.520234	0.545223	0.525571	0.596538	0.470989	0.662145	0.686078
YBR250W	YBR250W	1.01436	0.939853	1.0313	1.05793	1.06292	1.04588	1.11156	0.865956	0.815292	1.01537
YBR251W	MRPS5	0.881806	0.807897	0.788739	0.768513	0.841112	0.891277	0.861583	0.848257	0.885361	0.901979
YBR252W	DUT1	0.783483	0.840551	0.747113	0.885489	0.885306	0.771221	0.862052	0.695383	0.90655	0.911244
YBR253W	SRB6	0.996552	1.02465	0.950963	0.920994	0.997132	0.947132	0.885113	0.710378	0.761837	0.690698
YBR254C	TRS20	0.953878	0.840949	0.920425	0.940483	1.08003	1.04386	1.05494	0.850073	0.936542	1.06899
YBR255C-A	YBR255C-A	0.988454	0.737743	0.791166	0.823814	0.884027	0.842819	0.82226	0.657847	0.894623	1.02018
YBR255W	YBR255W	0.953878	0.840949	0.920425	0.940483	1.08003	1.04386	1.05494	0.872048	0.937484	1.02188
YBR256C	RIB5	0.898079	0.729201	0.739601	0.728492	0.837025	0.792841	1.05217	0.898946	1.07984	1.18343
YBR257W	POP4	0.808384	0.708216	0.685086	0.752158	0.880641	0.82932	0.997168	0.858056	1.19844	1.35714
YBR258C	SHG1	0.767879	0.759921	0.888786	0.860065	1.05769	0.900751	0.978882	0.846834	1.05497	0.955093
YBR259W	YBR259W	0.767879	0.759921	0.888786	0.860065	1.05769	0.900751	0.978882	0.772741	0.815096	0.862756
YBR260C	RGD1	1.1414	1.03205	0.956134	1.00774	0.976061	0.981467	0.976529	0.914827	0.944993	1.08667
YBR261C	YBR261C	1.04508	1.06292	0.970324	0.868883	0.865837	0.9298	0.896111	1.01813	1.08667	1.01021
YBR262C	FMP51	1.09866	1.05503	0.984703	0.856413	1.03331	1.01663	1.13201	0.81024	1.02913	1.29171
YBR263W	SHM1	1.09866	1.05503	0.984703	0.856413	1.03331	1.01663	1.13201	0.853975	0.930119	0.978662
YBR264C	YPT10	0.888797	0.801972	0.810022	0.802403	0.90436	0.897489	0.830031	0.625378	0.870048	0.776368
YBR265W	TSC10	0.888797	0.801972	0.810022	0.802403	0.90436	0.897489	0.830031	0.968803	1.23779	1.21447
YBR267W	REI1	0.857442	0.93102	0.814621	0.90286	0.962654	0.858803	0.890894	0.442763	0.57961	0.610234
YBR268W	MRPL37	1.02269	1.06894	0.849795	0.841549	1.00125	0.994886	0.979799	0.669502	0.770222	0.77663
YBR269C	FMP21	0.827983	0.827446	0.753547	0.73694	0.892962	0.840185	0.882885	0.572454	0.785239	0.932242
YBR270C	BIT2	0.997818	0.932974	0.947735	0.902073	0.878	1.02457	1.02384	0.994865	1.12272	1.06566
YBR271W	YBR271W	0.997818	0.932974	0.947735	0.902073	0.878	1.02457	1.02384	0.994865	1.12272	1.06566
YBR272C	HSM3	0.585424	0.608563	0.644728	0.689707	0.746525	0.720608	0.71253	0.565242	0.839299	0.938225
YBR273C	UBX7	1.10492	0.992398	0.918216	0.917373	0.935908	1.04175	1.00981	0.895991	1.02933	1.01683
YBR274W	CHK1	1.10492	0.992398	0.918216	0.917373	0.935908	1.04175	1.00981	0.91754	1.09542	0.992965
YBR275C	RIF1	0.794045	0.767737	0.803567	0.884227	0.939995	0.841861	0.930101	0.629287	0.695012	0.790302
YBR276C	PPS1	1.05837	0.892862	0.86183	0.953993	0.91707	1.0115	1.10533	0.968822	1.07428	1.04146
YBR278W	DPB3	1.05837	0.892862	0.86183	0.953993	0.91707	1.0115	1.10533	0.968336	1.11639	1.24551
YBR279W	PAF1	0.832181	0.745014	0.671373	0.663808	0.667198	0.714189	0.745484	0.882917	1.06145	1.30272
YBR280C	SAF1	0.843373	0.783125	0.837528	0.915079	0.941886	0.937796	0.942953	0.686727	0.942477	0.981566
YBR281C	YBR281C	0.978755	0.96994	0.953773	0.945812	1.00319	1.1094	1.13406	0.813452	0.922267	0.978409
YBR282W	MRPL27	0.767798	0.764191	0.827952	0.887513	0.925736	0.904655	0.982517	0.663484	0.764554	0.794684
YBR283C	SSH1	0.777747	0.732976	0.608511	0.609238	0.772882	0.803551	0.71033	0.579799	0.663903	0.707897
YBR284W	YBR284W	0.777747	0.732976	0.608511	0.609238	0.772882	0.803551	0.71033	0.672134	0.745621	0.864707
YBR285W	YBR285W	0.816174	0.773312	0.713472	0.700572	0.656722	0.786204	0.773061	0.890417	1.06855	0.9979
YBR286W	APE3	0.697652	0.610934	0.629326	0.63198	0.695213	0.688328	0.652778	0.82688	1.0898	1.0635
YBR287W	ZSP1	0.805627	0.76715	0.752655	0.755191	0.879754	0.808144	0.884115	0.756033	0.881613	0.928323
YBR288C	APM3	1.08246	1.07446	0.960023	0.986574	0.954971	1.05325	1.06747	0.826678	0.895901	0.971991
YBR289W	SNF5	1.08246	1.07446	0.960023	0.986574	0.954971	1.05325	1.06747	0.872744	0.969236	1.03936
YBR290W	BSD2	0.785743	0.837305	0.79738	0.782896	0.972547	0.877709	0.838158	0.647881	0.686783	0.783209
YBR291C	CTP1	0.798434	0.750054	0.655289	0.83695	0.883688	0.820464	0.801691	0.971858	0.966451	0.931012
YBR293W	VBA2	0.992668	0.920368	0.866254	0.908217	0.952471	0.957099	0.933412	0.982306	1.04179	1.03189
YBR294W	SUL1	0.745007	0.633717	0.755862	0.749884	0.954129	0.69227	0.901271	0.947306	1.17841	1.03669
YBR295W	PCA1	0.868913	0.803998	0.831477	0.884478	1.07428	0.905673	0.916771	0.830947	0.862481	1.19468
YBR296C	PHO89	0.644665	0.58629	0.627919	0.723472	0.762154	0.652207	0.746112	0.930409	0.965198	1.14646
YBR296C-A	YBR296C-A	0.814071	0.722435	0.753235	0.738611	0.808021	0.791041	0.875952	0.851988	0.887436	1.07507
YBR297W	MAL33	0.814071	0.722435	0.753235	0.738611	0.808021	0.791041	0.875952	0.957281	0.834501	1.14587
YBR298C	MAL31	0.673432	0.614643	0.610602	0.667914	0.634313	0.662529	0.67668	0.773413	0.923137	0.943954
YBR298C-A	YBR298C-A	0.462947	0.46628	0.51096	0.481186	0.46215	0.466691	0.472089	0.532744	0.749378	0.789061
YBR299W	MAL32	0.673432	0.614643	0.610602	0.667914	0.634313	0.662529	0.67668	0.929943	0.988563	1.03516
YCL001W	RER1	0.891037	0.895688	0.850505	0.943003	1.06087	0.920802	0.952612	0.737676	0.856136	0.801124
YCL001W-A	YCL001W-A	0.823527	0.913702	1.03871	1.18291	1.25277	1.03632	1.1928	0.521653	0.601006	0.626618
YCL002C	YCL002C	0.891037	0.895688	0.850505	0.943003	1.06087	0.920802	0.952612	0.693088	0.92188	0.814903
YCL004W	PGS1	0.918628	0.81244	0.887901	0.929435	0.93636	0.92146	0.928292	1.16224	1.19699	1.24747
YCL005W	LDB16	1.14207	1.18817	0.838035	0.886544	0.827179	0.831093	0.924967	0.512437	0.650795	0.657451
YCL005W-A	VMA9	1.15839	1.02557	0.852966	0.832048	0.975421	0.955034	0.942465	0.865143	0.872137	0.922324
YCL008C	STP22	1.15839	1.02557	0.852966	0.832048	0.975421	0.955034	0.942465	0.865143	0.872137	0.922324
YCL009C	ILV6	1.44759	1.15546	0.888403	0.645358	0.866512	0.733164	0.852042	1.3482	1.36614	1.25124
YCL010C	SGF29	1.12313	0.845176	0.793336	0.763177	0.946912	0.770774	0.89588	1.20872	1.30179	1.2907
YCL011C	GBP2	1.03644	1.0023	0.989555	0.870466	1.0341	0.941146	1.07182	1.02181	0.94346	1.12528
YCL012C	YCL012C	0.604512	0.605062	0.639398	0.657448	0.713341	0.719784	0.718396	0.615286	0.764124	0.723319
YCL014W	BUD3	1.02408	1.02064	0.890284	1.00514	1.05252	1.01449	1.00533	0.936989	0.906531	0.80144
YCL016C	DCC1	1.1003	1.0255	1.00408	1.11718	1.14326	1.07383	1.09015	0.801329	0.834114	0.932249
YCL017C	NFS1	0.873993	0.804204	0.830221	0.813425	0.879312	0.790316	0.798537	0.627129	0.656176	0.792054
YCL021W-A	YCL021W-A	0.509987	0.503865	0.60475	0.819772	0.831819	0.79883	0.937897	0.812809	0.942983	0.995479
YCL024W	KCC4	0.941689	0.976828	1.01117	0.932346	1.15918	0.987706	1.09329	0.300126	0.517242	0.401361
YCL025C	AGP1	0.319598	0.324204	0.347123	0.561294	0.356097	0.595431	0.349094	0.586464	0.832428	0.734705
YCL026C-A	FRM2	1.06874	1.05294	1.16743	1.18654	1.26123	1.19579	1.21362	0.590108	0.829176	0.871448
YCL026C-B	YCL026C-B	1.14211	1.14812	0.995881	0.956956	0.987088	1.06256	1.06886	0.959225	0.958772	1.0703
YCL027W	FUS1	0.886596	0.666662	0.890657	0.960851	1.1209	0.986647	1.0536	1.27897	1.31788	1.37159
YCL028W	RNQ1	1.52832	1.40108	1.15185	1.18626	1.18892	1.22299	1.17227	0.81539	0.903517	1.01331
YCL029C	BIK1	1.52832	1.40108	1.15185	1.18626	1.18892	1.22299	1.17227	0.919173	0.972329	0.907589
YCL030C	HIS4	0.952517	0.286274	0.367413	0.773315	0.355239	0.646563	0.5201	0.173162	0.284113	0.333563
YCL031C	RRP7	1.02555	0.675136	0.613263	0.791899	0.675594	0.733553	0.664904	0.864564	1.10358	1.2166
YCL032W	STE50	1.43925	1.37242	1.24434	1.21972	1.08759	1.33964	1.26498	0.872379	0.887679	0.990611
YCL033C	YCL033C	1.43925	1.37242	1.24434	1.21972	1.08759	1.33964	1.26498	0.872379	0.887679	0.990611
YCL034W	LSB5	1.25656	1.02132	0.953116	1.00279	1.18611	1.18806	1.15876	0.771838	0.846736	0.93774
YCL035C	GRX1	1.0662	0.857478	0.865317	0.95163	1.17924	1.06132	1.10578	1.15026	1.09406	1.32385
YCL036W	GFD2	0.958116	0.95657	0.954982	0.933202	1.00439	0.965565	1.00543	0.665981	0.974518	0.891719
YCL037C	SRO9	0.958116	0.95657	0.954982	0.933202	1.00439	0.965565	1.00543	0.596204	0.829617	0.826931
YCL038C	ATG22	0.683375	0.689965	0.767083	0.921501	0.947049	0.911946	0.89319	0.786549	0.831424	0.903947
YCL039W	GID7	0.682991	0.642491	0.714258	0.691451	0.711651	0.775449	0.7297	0.822905	1.00347	1.16932
YCL040W	GLK1	0.575804	0.565976	0.445904	0.401305	0.518937	0.495896	0.53666	0.758161	0.850596	0.761542
YCL043C	PDI1	0.575804	0.565976	0.445904	0.401305	0.518937	0.495896	0.53666	0.870547	1.00347	0.991161
YCL044C	MGR1	0.986849	0.958075	0.914033	0.86498	0.982124	0.906414	0.924109	0.825749	0.901377	0.869817
YCL045C	YCL045C	1.01253	0.963225	0.855483	0.846765	0.945169	0.852529	0.932465	0.784431	0.811049	0.921376
YCL047C	YCL047C	0.921718	0.868084	0.841663	0.82003	1.00386	1.06937	1.00648	0.899418	0.942564	0.964672
YCL048W	SPS22	0.642644	0.559479	0.657461	0.730053	0.830529	0.75084	0.730431	1.08137	1.1667	1.11736
YCL048W-A	YCL048W-A	1.22348	1.06318	0.989647	0.981549	1.16076	1.04196	1.1847	0.85601	0.942251	0.910838
YCL049C	YCL049C	1.22348	1.06318	0.989647	0.981549	1.16076	1.04196	1.1847	0.924236	0.9075	0.898684
YCL050C	APA1	0.901768	0.853565	0.832169	0.83499	1.02507	0.878363	1.02585	0.677193	1.01533	0.983829
YCL051W	LRE1	1.20753	1.10912	1.08153	1.10201	1.12186	1.08559	1.07938	1.1762	1.23807	1.20031
YCL052C	PBN1	1.20753	1.10912	1.08153	1.10201	1.12186	1.08559	1.07938	0.836151	0.891732	1.025
YCL054W	SPB1	0.88574	0.862359	0.894823	0.904177	1.05221	0.925777	1.04458	1.02389	1.14851	1.23121
YCL055W	KAR4	0.799473	0.574887	0.756397	0.859453	1.14145	1.06772	1.02006	0.752464	0.747216	0.896354
YCL056C	YCL056C	1.06124	1.03469	1.03977	1.03774	1.23817	1.23359	1.28229	1.08308	1.13087	1.12795
YCL057C-A	YCL057C-A	1.20329	1.10617	0.928933	0.871857	0.968609	1.03595	0.954724	1.1133	1.1143	1.16465
YCL057W	PRD1	1.1641	1.13879	0.940776	0.977077	1.02755	1.08941	1.06091	0.839472	1.03695	0.903492
YCL058C	FYV5	1.19801	1.11855	0.90402	0.992564	0.896569	1.06504	1.02625	0.931215	1.01722	1.02886
YCL058W-A	YCL058W-A	1.14177	1.09464	1.14293	1.25102	1.2689	1.2089	1.28172	0.943802	0.896574	0.875458
YCL059C	KRR1	1.14177	1.09464	1.14293	1.25102	1.2689	1.2089	1.28172	0.663038	0.718487	0.79459
YCL061C	MRC1	1.01775	1.00146	0.986607	1.10493	1.0124	1.14411	1.08428	1.03525	1.00354	1.039
YCL063W	VAC17	0.747476	0.576612	0.605607	0.681239	0.74739	0.816986	0.618756	1.02273	1.15762	1.06595
YCL064C	CHA1	0.745338	0.57415	0.603767	0.679447	0.745476	0.815546	0.616514	1.35234	1.13644	1.21038
YCL069W	VBA3	0.250016	0.265712	0.325346	0.301637	0.286428	0.271535	0.318161	0.303103	0.395752	0.406069
YCR002C	CDC10	1.00616	0.879413	0.943077	0.95579	1.05542	0.964445	1.01846	1.12093	1.20079	1.20959
YCR003W	MRPL32	1.00616	0.879413	0.943077	0.95579	1.05542	0.964445	1.01846	0.810131	0.872891	1.02423
YCR004C	YCP4	0.676296	0.523262	0.483699	0.734274	0.849647	0.770114	0.755154	1.01861	1.11927	1.13166
YCR005C	CIT2	0.586524	0.324598	0.0879919	0.431646	0.474945	0.483327	0.416511	0.524259	0.873543	0.931745
YCR009C	RVS161	0.910261	0.781466	0.730024	0.902726	1.23877	0.954057	1.03401	0.984257	1.06513	1.13413
YCR010C	ADY2	0.85536	0.793639	0.727123	0.735185	0.817977	0.858192	0.766446	0.718656	0.911398	0.986867
YCR011C	ADP1	0.977203	0.880912	0.978623	0.988971	1.19538	1.123	1.16527	0.706123	0.814927	0.834504
YCR012W	PGK1	0.360426	0.292078	0.316003	0.412004	0.500186	0.485373	0.430928	1.10216	1.18836	1.07628
YCR015C	YCR015C	0.943311	0.98682	1.0987	1.07395	1.29294	1.1642	1.3002	0.661726	0.677983	0.828406
YCR016W	YCR016W	1.02528	0.973938	1.0658	1.11848	1.24884	1.15643	1.1437	0.898013	0.93042	0.86189
YCR017C	CWH43	0.968595	0.938532	0.830389	0.931302	0.988732	0.952848	1.03156	0.808613	0.830141	0.921926
YCR020C	PET18	0.888758	0.843766	0.841186	0.94805	0.920174	0.916987	0.93403	0.968958	1.04559	1.04771
YCR020C-A	MAK31	0.888758	0.843766	0.841186	0.94805	0.920174	0.916987	0.93403	0.862253	0.997826	1.05273
YCR020W-B	HTL1	0.888758	0.843766	0.841186	0.94805	0.920174	0.916987	0.93403	1.08226	1.10229	1.06927
YCR023C	YCR023C	1.04897	0.893318	0.889306	0.89843	1.08723	0.941115	0.988872	1.13753	1.07411	1.25889
YCR024C	SLM5	0.752926	0.665086	0.822397	0.939566	0.926925	0.951262	0.933628	0.891169	1.20747	1.45136
YCR024C-A	PMP1	0.299538	0.312547	0.399699	0.611147	0.592258	0.616124	0.519417	0.570169	0.728806	0.739637
YCR026C	NPP1	0.983825	0.92625	0.990608	1.01214	1.13407	1.07976	1.1545	0.927133	1.04165	1.06371
YCR027C	RHB1	0.63403	0.545603	0.641093	0.630233	0.763562	0.734302	0.716244	0.991273	0.952397	0.836699
YCR028C	FEN2	0.805045	0.681573	0.765033	0.875443	0.945374	0.956082	0.99554	1.12983	1.22828	1.20392
YCR028C-A	RIM1	0.89568	0.880708	0.799435	0.887614	0.891023	0.92407	0.916496	0.926304	1.09326	0.932467
YCR030C	SYP1	0.871578	0.803158	0.963939	0.95861	1.03959	0.988082	1.01212	0.759084	0.994706	1.13226
YCR031C	RPS14A	0.549083	0.484483	0.52315	0.594908	0.759742	0.680811	0.741	0.927594	0.883375	1.03703
YCR032W	BPH1	1.1101	1.08881	1.15434	1.0719	1.30523	1.27523	1.22924	0.80388	0.819578	0.74661
YCR033W	SNT1	0.827471	0.782632	0.794655	0.749323	0.843924	0.79557	0.845776	0.885333	1.01726	0.914683
YCR034W	FEN1	0.570561	0.602919	0.630858	0.583367	0.628215	0.636024	0.672489	0.508909	0.760766	0.665087
YCR035C	RRP43	0.829343	0.809817	0.898238	0.926031	1.01302	1.01476	0.973829	1.01308	1.04063	1.0084
YCR036W	RBK1	0.829343	0.809817	0.898238	0.926031	1.01302	1.01476	0.973829	1.01308	1.04063	1.0084
YCR037C	PHO87	0.78125	0.714449	0.778986	0.887662	0.907561	0.857467	0.858081	0.813381	0.846941	0.782198
YCR042C	TAF2	0.772332	0.728169	0.759985	0.752749	0.896603	0.819239	0.81423	0.731863	0.815436	0.898435
YCR043C	YCR043C	0.964166	0.90877	0.855768	0.899187	1.04324	0.911474	0.974295	0.866365	0.862481	1.00755
YCR044C	PER1	1.0852	0.996854	0.918132	1.02787	1.0302	1.1117	1.01494	0.660214	0.921168	0.795781
YCR045C	YCR045C	0.883997	0.812161	0.774546	0.748171	0.78838	0.855586	0.808737	0.871165	1.0875	1.16043
YCR046C	IMG1	1.06098	0.998587	0.907377	0.776735	1.01723	0.995135	1.0678	0.955039	0.937945	1.01785
YCR047C	BUD23	1.09336	1.03252	0.832594	0.713217	0.890918	0.964922	0.847385	0.740401	0.69642	0.792236
YCR048W	ARE1	1.09336	1.03252	0.832594	0.713217	0.890918	0.964922	0.847385	0.574623	0.768978	0.715521
YCR050C	YCR050C	0.853593	0.812	0.783648	0.708249	0.826864	0.781626	0.85786	1.00753	0.962868	0.974438
YCR051W	YCR051W	0.853593	0.812	0.783648	0.708249	0.826864	0.781626	0.85786	1.00753	0.962868	0.974438
YCR052W	RSC6	0.912962	0.903798	0.821284	0.853203	0.920814	0.896253	0.791279	0.824755	0.837039	0.85663
YCR053W	THR4	1.01104	0.894172	0.814205	0.772909	0.916106	0.755795	0.872051	0.961578	1.06585	1.27104
YCR054C	CTR86	0.722008	0.68317	0.805064	0.835009	0.868533	0.937648	0.843803	1.02538	0.891262	0.870423
YCR057C	PWP2	1.27321	1.17917	0.896954	0.817754	0.958517	0.883288	0.894517	0.945039	0.880895	1.01521
YCR059C	YIH1	1.17106	1.10468	0.832863	0.791184	0.98695	0.907366	1.0184	0.690399	0.827202	0.73157
YCR060W	TAH1	1.17106	1.10468	0.832863	0.791184	0.98695	0.907366	1.0184	0.859325	0.982418	1.18907
YCR061W	YCR061W	0.857683	0.943228	0.824278	0.805088	0.952015	0.867505	0.898628	0.422239	0.621872	0.603243
YCR063W	BUD31	1.11332	1.02027	0.808255	0.807969	0.931552	1.02148	1.06067	0.680407	0.785591	0.747875
YCR065W	HCM1	0.363026	0.385976	0.412669	0.416416	0.449822	0.565999	0.471217	0.623673	0.762378	0.684362
YCR066W	RAD18	0.947828	0.816479	0.952467	1.01471	0.965093	1.06576	1.05371	0.408411	0.6305	0.547595
YCR067C	SED4	0.785197	0.639758	0.631738	0.68145	0.877842	0.770092	0.769926	0.98785	1.12085	1.2067
YCR068W	ATG15	0.747613	0.638046	0.646719	0.723067	0.903462	0.851264	0.760924	0.865156	0.808053	0.891353
YCR069W	CPR4	1.14475	0.981695	0.774895	0.769873	0.947001	0.910241	0.925016	0.80137	0.984224	1.05303
YCR071C	IMG2	0.996992	0.938658	0.862305	0.910036	0.96408	0.978532	1.0212	0.991795	1.07892	1.02732
YCR072C	RSA4	0.80785	0.740768	0.759837	0.779961	0.883792	0.783558	0.906276	0.947402	1.09822	1.07039
YCR073C	SSK22	0.93575	0.915326	0.757683	0.822044	0.769968	0.731751	0.735008	0.722487	0.757605	0.760521
YCR073W-A	SOL2	0.93575	0.915326	0.757683	0.822044	0.769968	0.731751	0.735008	0.818742	0.995973	0.929534
YCR075C	ERS1	1.29433	1.29526	1.03154	1.02254	1.15273	1.10508	1.13737	0.72034	0.818163	0.911439
YCR075W-A	YCR075W-A	1.29433	1.29526	1.03154	1.02254	1.15273	1.10508	1.13737	0.904155	0.769729	0.781215
YCR076C	YCR076C	0.866083	0.830601	0.880623	0.887375	0.985548	0.856354	0.894317	0.726386	0.727266	0.870752
YCR077C	PAT1	1.2216	1.2394	1.0303	0.950652	1.05071	1.15506	1.05483	0.602467	0.858058	0.948501
YCR079W	AUP1	1.2216	1.2394	1.0303	0.950652	1.05071	1.15506	1.05483	0.797157	0.90218	0.867473
YCR081W	SRB8	0.90877	0.868947	0.854331	0.889377	0.888051	0.884735	0.857821	0.739029	0.944038	0.761235
YCR082W	AHC2	1.06201	0.9603	0.891657	0.874989	1.00851	0.974233	0.892677	0.914827	0.944993	1.08667
YCR083W	TRX3	0.915332	0.892476	0.893689	1.05761	1.1383	1.08171	1.11164	1.08308	1.13087	1.12795
YCR084C	TUP1	0.653801	0.65913	0.611987	0.636291	0.704333	0.700976	0.727717	0.644688	0.707053	0.792046
YCR086W	CSM1	1.23481	1.22994	1.1447	1.28476	1.45735	1.35189	1.45126	0.843701	1.03906	1.11843
YCR087C-A	LUG1	1.0574	1.13626	1.10631	1.02475	1.13178	1.12345	1.18301	0.482561	0.57674	0.59776
YCR088W	ABP1	0.967883	1.01862	0.961132	0.91673	0.88294	0.938453	0.948097	0.502413	0.725006	0.740419
YCR089W	FIG2	0.75947	0.688488	0.823043	0.877946	0.939278	0.884737	0.888148	1.0273	1.08446	0.834434
YCR090C	YCR090C	0.703565	0.707686	0.792225	0.806737	0.973933	0.874394	0.87572	0.757991	0.785857	0.99678
YCR091W	KIN82	1.03205	0.966909	1.03513	0.9423	0.946256	1.10275	0.961068	0.869047	1.06655	0.851979
YCR092C	MSH3	0.935816	0.973556	0.864162	0.84133	0.975294	0.963134	0.994174	0.512437	0.650795	0.657451
YCR093W	CDC39	0.935816	0.973556	0.864162	0.84133	0.975294	0.963134	0.994174	0.610975	0.89909	0.877275
YCR094W	CDC50	0.706214	0.725429	0.740577	0.838845	0.920579	0.862658	0.93426	0.408054	0.585308	0.567485
YCR095C	OCA4	0.817134	0.770873	0.791629	0.950101	1.01459	0.999916	0.96692	0.828937	1.00286	0.944589
YCR095W-A	YCR095W-A	0.817134	0.770873	0.791629	0.950101	1.01459	0.999916	0.96692	0.790756	0.948803	0.90704
YCR098C	GIT1	1.03174	1.07264	1.19052	1.34377	1.25012	1.27838	1.10984	0.680455	0.60949	0.511094
YCR100C	YCR100C	0.817421	0.831775	0.962202	1.06995	1.12894	1.0668	1.04708	0.802085	0.924716	0.967691
YCR101C	YCR101C	0.81161	0.825143	0.955893	1.06475	1.12482	1.06206	1.04213	0.800175	0.752335	0.714125
YCR102C	YCR102C	0.576892	0.644277	0.612557	0.663419	0.73585	0.713722	0.695001	0.00273459	0.00382029	0.00325536
YCR104W	PAU3	0.531934	0.509395	0.532781	0.567792	0.545967	0.560577	0.56805	0.759181	0.976254	0.907374
YCR105W	ADH7	0.688703	0.750183	0.876173	0.92382	0.837266	0.872516	0.93003	0.737968	0.833132	0.730017
YCR106W	RDS1	0.929888	0.889797	0.870156	0.920468	0.958792	0.935088	0.915352	0.771739	0.878207	0.920889
YDL001W	RMD1	0.869646	0.786936	0.791782	0.727763	0.947361	0.849167	0.950367	0.854193	1.0191	0.988897
YDL002C	NHP10	0.869646	0.786936	0.791782	0.727763	0.947361	0.849167	0.950367	0.82547	0.985514	0.958916
YDL003W	MCD1	0.562756	0.536133	0.718069	0.762802	0.930447	0.75976	0.782343	0.648451	0.767481	0.884062
YDL004W	ATP16	0.999481	0.956431	0.906765	0.798795	1.03452	0.787091	0.91492	0.688345	0.967043	0.954107
YDL005C	MED2	0.920843	0.785545	0.875048	0.919072	1.06388	0.948263	1.05968	1.0318	1.12018	1.35156
YDL006W	PTC1	0.828465	0.675187	0.784177	0.799567	0.908237	0.823404	0.916787	0.824818	0.885629	0.953661
YDL007C-A	YDL007C-A	1.03773	1.00661	1.26927	1.26714	1.24521	1.11705	1.11042	0.890637	1.06253	1.06172
YDL007W	RPT2	0.518237	0.508024	0.594533	0.617025	0.783962	0.61674	0.725641	0.790096	1.01099	0.960676
YDL008W	APC11	1.26948	1.19735	0.984343	1.00751	1.10153	1.01696	1.16116	0.842975	1.05371	1.04123
YDL010W	YDL010W	1.11171	0.963584	0.673212	0.840164	1.08336	0.95803	0.973502	0.925433	0.883003	0.95012
YDL012C	YDL012C	1.27815	1.17982	0.817326	0.994569	1.06924	0.938754	1.01926	0.795528	1.0132	1.14565
YDL013W	HEX3	0.805093	0.739292	0.857695	0.818291	1.0269	0.960003	0.943056	0.747438	0.806144	0.941531
YDL014W	NOP1	0.51762	0.535067	0.620689	0.569595	0.743466	0.585105	0.681315	0.542813	0.702409	0.629593
YDL015C	TSC13	0.51762	0.535067	0.620689	0.569595	0.743466	0.585105	0.681315	0.542451	0.718321	0.681341
YDL017W	CDC7	1.1637	0.991516	1.1355	1.09506	1.28772	1.28076	1.17276	1.13753	1.07411	1.25889
YDL018C	ERP3	1.12833	1.09509	1.01546	1.02217	1.04054	1.1056	1.04609	0.779361	0.993861	0.865452
YDL019C	OSH2	1.01502	0.802678	0.774644	0.87797	1.0154	0.971946	0.937936	1.20596	1.24752	1.1393
YDL020C	RPN4	0.736092	0.649701	0.594547	0.684188	0.73878	0.662965	0.812547	0.817496	0.91361	0.954599
YDL021W	GPM2	0.853909	0.602324	0.858267	0.786679	0.98758	0.938353	0.995457	0.335238	0.419365	0.521791
YDL022W	GPD1	0.298947	0.188868	0.281979	0.422674	0.480633	0.631863	0.472235	0.959414	1.1591	1.02169
YDL024C	DIA3	0.712975	0.608416	0.624602	0.588485	0.677207	0.660652	0.688457	0.975727	1.06911	1.22737
YDL025C	YDL025C	1.27128	0.858507	0.88446	1.05194	1.09756	1.14362	1.09917	0.702632	0.831439	0.735329
YDL027C	YDL027C	0.757646	0.675446	0.689945	0.746506	0.783865	0.758792	0.760604	0.964413	0.937939	0.967278
YDL028C	MPS1	0.642302	0.605186	0.705062	0.834684	0.781009	0.735132	0.740289	0.860895	0.91719	0.949533
YDL029W	ARP2	0.824546	0.842279	0.777321	0.814539	0.876482	0.854218	0.894548	0.888701	0.96897	0.86705
YDL030W	PRP9	0.972118	1.02439	1.05228	1.08469	1.12627	1.01935	1.00783	0.633678	0.891006	0.803853
YDL031W	DBP10	1.13617	1.12946	0.958486	1.09228	1.04189	1.1198	1.09791	0.679716	0.788154	0.795076
YDL033C	SLM3	1.13617	1.12946	0.958486	1.09228	1.04189	1.1198	1.09791	0.766626	0.730682	0.825489
YDL035C	GPR1	0.799038	0.66026	0.697185	0.646684	0.887585	0.638289	0.824466	0.479658	0.698592	0.542359
YDL036C	PUS9	0.861825	0.737262	0.795502	0.923281	1.12932	0.925385	1.003	0.980432	1.07849	1.15979
YDL037C	BSC1	0.789367	0.821157	0.767537	0.776439	0.835124	0.797897	0.841847	0.610975	0.89909	0.877275
YDL040C	NAT1	1.12683	0.993074	1.03429	1.06622	1.10357	1.1909	1.24658	0.688084	0.624564	0.67512
YDL042C	SIR2	0.780387	0.697654	0.78534	0.856085	0.862961	0.762204	0.943391	0.973511	0.989569	1.03625
YDL043C	PRP11	0.9713	0.927213	0.95452	0.972379	1.04127	0.98431	0.963691	0.909244	0.972726	0.87796
YDL044C	MTF2	0.966082	0.850028	0.951808	1.05902	1.11748	1.16333	1.18938	0.874763	1.05731	1.03624
YDL045C	FAD1	0.849316	0.703021	0.839925	0.955702	0.981586	0.915956	0.964697	1.18298	1.16858	1.22665
YDL045W-A	MRP10	0.792829	0.748994	0.810786	0.721638	1.03174	0.8617	0.972133	0.923757	1.12198	0.982347
YDL046W	NPC2	0.56876	0.528973	0.485673	0.504173	0.528601	0.514411	0.603677	0.937678	1.00071	1.13287
YDL049C	KNH1	0.589797	0.660409	0.655567	0.716822	0.889497	0.765096	0.957131	0.466075	0.595699	0.613356
YDL051W	LHP1	0.89972	0.908484	0.933449	0.896938	1.04634	0.968781	1.02062	0.600744	0.672455	0.747736
YDL052C	SLC1	0.89972	0.908484	0.933449	0.896938	1.04634	0.968781	1.02062	0.599801	0.822699	0.796605
YDL053C	PBP4	0.680839	0.661067	0.695059	0.726673	0.836459	0.678437	0.765555	0.94729	1.06396	1.08683
YDL054C	MCH1	0.874844	0.803948	0.667694	0.755848	0.804561	0.788076	0.800912	0.849347	0.914556	1.11867
YDL055C	PSA1	0.383693	0.407786	0.487754	0.460451	0.44701	0.598981	0.555871	0.610916	0.835138	0.778313
YDL056W	MBP1	1.17314	1.15927	1.04449	1.12136	1.05073	1.06513	1.09838	0.888593	0.849461	0.985915
YDL057W	YDL057W	0.86669	0.874309	0.906639	1.00862	1.01145	1.01119	1.04037	0.458786	0.511317	0.611266
YDL058W	USO1	1.16902	1.2295	1.04901	1.11095	1.1365	1.18691	1.1124	0.505219	0.649553	0.702731
YDL059C	RAD59	1.5489	1.49207	1.31342	1.20341	1.30239	1.1587	1.3518	0.73414	0.821833	0.792038
YDL060W	TSR1	0.732429	0.68452	0.678167	0.711622	0.854296	0.804847	0.859549	0.900911	0.881139	0.998603
YDL061C	RPS29B	0.732429	0.68452	0.678167	0.711622	0.854296	0.804847	0.859549	0.982137	1.05434	1.1494
YDL064W	UBC9	1.06971	1.03637	0.971729	1.07643	1.10498	1.07563	1.09814	0.86715	1.01811	1.13056
YDL065C	PEX19	1.06971	1.03637	0.971729	1.07643	1.10498	1.07563	1.09814	0.75107	0.84724	0.914762
YDL066W	IDP1	1.50497	1.22012	0.908863	0.924868	0.909745	0.937739	0.992857	1.02082	1.15278	1.40471
YDL067C	COX9	1.3972	1.12449	0.991297	0.872146	1.08636	0.982469	1.19291	1.04155	0.981359	1.14529
YDL069C	CBS1	1.39819	1.12485	0.991554	0.872637	1.08581	0.982574	1.19248	0.5525	0.472295	0.491662
YDL070W	BDF2	0.859179	0.836424	0.547624	0.549841	0.575177	0.605047	0.616852	0.791056	0.899006	0.860739
YDL072C	YET3	0.867463	0.742434	0.63874	0.647378	0.779787	0.636446	0.774285	0.935388	0.990731	0.900305
YDL073W	YDL073W	1.01286	0.884604	0.887551	0.904928	0.942543	0.928701	0.969972	0.813395	0.892971	0.961672
YDL074C	BRE1	1.01286	0.884604	0.887551	0.904928	0.942543	0.928701	0.969972	0.906089	0.954586	0.951231
YDL075W	RPL31A	0.416331	0.370503	0.413634	0.474535	0.582857	0.508324	0.60753	1.00159	0.922422	0.992798
YDL076C	RXT3	0.416331	0.370503	0.413634	0.474535	0.582857	0.508324	0.60753	0.906435	0.980996	1.29017
YDL077C	VAM6	1.08785	0.888202	0.880936	1.01331	1.07769	1.03975	1.10161	0.514577	0.575118	0.773322
YDL078C	MDH3	1.33056	1.2284	0.947289	1.02349	1.17498	1.16334	1.19572	0.914724	1.03787	0.955889
YDL079C	MRK1	0.958293	0.927972	0.917248	0.868425	0.944795	0.942752	1.00081	0.678649	0.729622	0.854557
YDL080C	THI3	1.14905	1.04962	0.940425	0.974039	1.16787	1.05184	1.08087	1.11524	1.04659	1.06768
YDL081C	RPP1A	0.577152	0.566993	0.632901	0.652589	0.842303	0.735183	0.746272	0.761576	0.810706	0.892113
YDL082W	RPL13A	0.321728	0.31878	0.334874	0.323075	0.389417	0.388869	0.432162	0.866836	0.955407	0.909897
YDL083C	RPS16B	0.448242	0.460392	0.421447	0.473285	0.629822	0.591293	0.664088	0.551248	0.674713	0.607958
YDL084W	SUB2	0.861445	0.873487	0.753872	0.742907	0.899937	0.785223	0.866903	0.495457	0.40564	0.532133
YDL085C-A	YDL085C-A	0.920852	0.767474	0.769916	0.773044	0.943979	0.925839	1.03264	1.00031	0.942432	1.04331
YDL085W	NDE2	1.19478	1.02827	0.899517	0.777224	1.00866	0.992308	1.04	0.730421	0.943386	1.00302
YDL086W	YDL086W	1.22446	1.28762	1.06523	1.07957	1.24523	1.12812	1.21029	0.460682	0.521423	0.554916
YDL087C	LUC7	1.32671	1.39184	1.10444	0.986391	1.04442	1.18654	1.22567	0.525551	0.708891	0.835576
YDL088C	ASM4	0.943952	0.879367	0.744112	0.72677	0.755056	0.850139	0.788049	0.982909	1.14046	0.990762
YDL089W	YDL089W	1.20428	1.12883	1.05736	1.18664	1.22353	1.25008	1.31297	0.981048	1.07157	1.20778
YDL090C	RAM1	1.20428	1.12883	1.05736	1.18664	1.22353	1.25008	1.31297	0.73001	0.794966	0.69074
YDL091C	UBX3	1.00606	0.969656	0.916606	0.957937	1.11807	1.06189	1.1834	0.708673	0.845087	0.826933
YDL092W	SRP14	1.00501	0.937772	0.855882	0.970242	1.06266	0.951711	1.04832	0.828346	0.863796	0.935263
YDL093W	PMT5	0.767378	0.766028	0.817252	0.886682	0.872862	0.874516	0.830924	0.673178	0.75817	0.885515
YDL095W	PMT1	0.92443	1.01422	0.748263	0.743684	0.873097	0.828285	0.84671	0.404439	0.505223	0.521175
YDL097C	RPN6	0.92443	1.01422	0.748263	0.743684	0.873097	0.828285	0.84671	0.404439	0.505223	0.521175
YDL098C	SNU23	0.88374	0.866854	0.858974	1.0272	1.0434	0.906363	0.991889	1.02577	0.931614	1.05265
YDL099W	BUG1	1.09497	1.14076	1.03901	1.15483	1.26208	1.108	1.18406	0.870739	0.871452	1.02365
YDL100C	GET3	1.09497	1.14076	1.03901	1.15483	1.26208	1.108	1.18406	0.870739	0.871452	1.02365
YDL101C	DUN1	0.688091	0.781319	0.807597	0.925318	1.03518	0.891652	0.866768	0.675273	0.789688	0.827456
YDL102W	CDC2	1.21694	1.26504	1.1378	1.16136	1.28924	1.26042	1.11434	0.605904	0.798675	0.706749
YDL103C	QRI1	1.21694	1.26504	1.1378	1.16136	1.28924	1.26042	1.11434	0.525756	0.635083	0.620554
YDL104C	QRI7	0.732639	0.68694	0.767962	0.82789	0.954476	0.893778	0.885052	0.832657	1.01037	0.961995
YDL105W	NSE4	1.01079	0.967333	1.00357	1.05717	1.16055	1.0717	1.22361	0.391588	0.522364	0.405766
YDL106C	PHO2	1.13677	1.22514	1.05028	0.922508	1.15015	1.07018	1.13434	0.377049	0.472813	0.526612
YDL107W	MSS2	0.9365	0.906908	1.0031	1.0117	1.05963	0.970544	0.987985	0.988381	1.16659	1.17603
YDL108W	KIN28	1.01747	0.97718	0.980894	1.09132	1.11051	1.09492	1.17691	1.0282	1.02075	1.01393
YDL109C	YDL109C	1.01747	0.97718	0.980894	1.09132	1.11051	1.09492	1.17691	0.69332	0.901415	0.911214
YDL110C	TMA17	1.00357	0.898976	0.844925	0.737545	0.925473	0.915267	0.944166	0.897745	0.875901	0.970953
YDL111C	RRP42	0.756048	0.753419	0.635887	0.684009	0.765302	0.702619	0.758341	0.637836	0.795818	0.756452
YDL112W	TRM3	0.999017	1.03183	0.882286	0.923565	0.985433	0.965951	0.933531	0.695964	0.881913	0.857134
YDL113C	ATG20	0.999017	1.03183	0.882286	0.923565	0.985433	0.965951	0.933531	0.540333	0.716001	0.580292
YDL114W	YDL114W	1.12018	1.04896	1.17775	1.26471	1.28689	1.2334	1.24071	0.792109	0.997322	0.923826
YDL115C	IWR1	1.22608	1.18624	1.16544	1.15899	1.1038	1.19073	1.15497	0.718045	0.771967	0.783798
YDL116W	NUP84	0.750671	0.701372	0.747222	0.763065	0.86586	0.787078	0.7797	0.923681	0.888936	0.903409
YDL117W	CYK3	0.88027	0.823169	0.870736	0.877112	0.958678	0.799826	0.8803	0.798413	0.85413	0.89323
YDL119C	YDL119C	0.88027	0.823169	0.870736	0.877112	0.958678	0.799826	0.8803	0.714728	0.813432	0.824193
YDL120W	YFH1	1.07071	0.875537	0.847875	0.875932	1.0161	0.996508	0.946698	0.968762	1.28062	1.06591
YDL121C	YDL121C	1.07071	0.875537	0.847875	0.875932	1.0161	0.996508	0.946698	0.949301	1.05787	1.02364
YDL122W	UBP1	0.650003	0.59567	0.535897	0.648752	0.734789	0.701061	0.699493	1.02037	1.00922	1.21707
YDL123W	SNA4	0.889507	0.872748	0.751146	0.73774	0.856392	0.748257	0.818382	0.622161	0.775064	0.77512
YDL124W	YDL124W	0.589033	0.474241	0.454113	0.583191	0.797162	0.732426	0.738937	1.17896	1.18191	1.19705
YDL125C	HNT1	1.01736	0.775457	0.709475	0.686265	0.863019	0.812653	0.902218	0.974679	0.932483	0.941998
YDL126C	CDC48	0.918506	0.891572	0.768516	0.776722	0.820624	0.909052	0.971649	0.847056	1.1069	0.918123
YDL127W	PCL2	0.346484	0.256546	0.332229	0.483755	0.422012	0.580651	0.535649	0.57528	0.683432	0.675721
YDL128W	VCX1	0.705699	0.611739	0.653342	0.674604	0.77899	0.758455	0.790953	0.929278	1.00653	1.09837
YDL129W	YDL129W	0.741094	0.666035	0.663509	0.677421	0.798786	0.754009	0.802893	0.982163	1.12506	0.997573
YDL130W	RPP1B	0.559395	0.523053	0.565138	0.595918	0.653039	0.59118	0.63796	0.895394	1.00794	1.14074
YDL130W-A	STF1	0.766703	0.634824	0.624647	0.668585	0.840829	0.737586	0.86709	0.92145	1.14333	1.18567
YDL131W	LYS21	0.527599	0.255831	0.259398	0.267997	0.338485	0.326252	0.309545	0.505098	0.753068	0.716835
YDL132W	CDC53	0.76487	0.72157	0.815543	0.806915	0.860877	0.795798	0.847008	0.931074	0.995142	0.873558
YDL133C-A	RPL41B	0.50568	0.452942	0.537372	0.518119	0.671496	0.651161	0.730858	0.901906	0.927564	0.935774
YDL133W	YDL133W	0.50568	0.452942	0.537372	0.518119	0.671496	0.651161	0.730858	0.901906	0.927564	0.935774
YDL134C	PPH21	0.569841	0.491217	0.554972	0.600188	0.769758	0.637812	0.634316	1.03125	1.18295	1.19894
YDL135C	RDI1	0.754297	0.752566	0.841336	0.783449	0.960844	0.880719	0.906718	0.734481	0.868074	0.725547
YDL136W	RPL35B	0.484005	0.467735	0.51834	0.574956	0.724954	0.62618	0.684828	0.845423	1.06124	0.957882
YDL137W	ARF2	0.665596	0.587011	0.559558	0.541893	0.675842	0.61903	0.690313	0.91942	0.962325	0.928682
YDL138W	RGT2	0.642397	0.496715	0.553051	0.612128	0.770922	0.631247	0.739252	1.18268	1.35	1.32176
YDL139C	SCM3	0.981965	0.963846	0.877202	0.905456	1.07436	1.01761	1.05875	0.824846	0.859772	0.86643
YDL140C	RPO21	0.821374	0.675627	0.610639	0.575367	0.70325	0.625278	0.629235	1.13547	1.28667	1.15726
YDL141W	BPL1	1.02382	0.924599	0.802616	0.90604	0.918017	0.911869	1.01104	0.750154	0.936072	0.982463
YDL142C	CRD1	1.02382	0.924599	0.802616	0.90604	0.918017	0.911869	1.01104	0.946394	1.11886	1.20294
YDL143W	CCT4	1.25513	1.21153	0.987159	0.912137	1.04439	1.04013	0.97142	0.839582	1.02689	1.10229
YDL144C	YDL144C	1.25513	1.21153	0.987159	0.912137	1.04439	1.04013	0.97142	0.987607	1.02184	1.23335
YDL145C	COP1	1.08639	1.02103	0.811432	0.883137	0.939816	0.866804	0.849968	0.870347	0.815216	0.903412
YDL146W	LDB17	0.653721	0.630453	0.655133	0.813902	0.760889	0.733792	0.765054	0.781797	0.825497	0.861486
YDL147W	RPN5	0.772879	0.82986	0.767753	0.901767	0.909233	0.866248	0.921172	0.504046	0.783273	0.641095
YDL148C	NOP14	0.772879	0.82986	0.767753	0.901767	0.909233	0.866248	0.921172	0.504046	0.783273	0.641095
YDL149W	ATG9	0.933479	1.02437	0.946933	1.04757	0.96891	1.05586	1.03712	0.525519	0.525386	0.639686
YDL150W	RPC53	0.871686	0.937704	0.909746	0.987857	1.12274	1.1689	1.15382	0.467595	0.640737	0.722087
YDL153C	SAS10	0.871686	0.937704	0.909746	0.987857	1.12274	1.1689	1.15382	0.542215	0.596155	0.587655
YDL154W	MSH5	0.880079	0.997653	1.05007	1.0004	1.0796	0.96628	0.975159	0.641527	0.807616	0.908621
YDL155W	CLB3	0.768683	0.737437	0.725409	0.697199	0.817697	0.690937	0.731802	0.672809	0.725275	0.802118
YDL156W	YDL156W	0.963847	0.885203	0.859705	1.01212	1.06319	1.00061	1.09662	1.03708	1.11703	1.18716
YDL157C	YDL157C	0.963847	0.885203	0.859705	1.01212	1.06319	1.00061	1.09662	1.03708	1.11703	1.18716
YDL159W	STE7	0.846938	0.825521	0.758391	0.824682	0.963909	0.895613	0.924605	0.451399	0.53304	0.633578
YDL160C	DHH1	0.846938	0.825521	0.758391	0.824682	0.963909	0.895613	0.924605	0.783708	0.895524	0.957516
YDL160C-A	YDL160C-A	0.47023	0.513585	0.51146	0.560888	0.632775	0.591183	0.624296	0.369813	0.500937	0.458886
YDL161W	ENT1	1.08016	1.11367	0.976868	0.900437	0.956026	1.00398	0.960344	0.485267	0.735028	0.698478
YDL164C	CDC9	1.07037	1.111	1.00063	0.943714	0.929425	1.05773	0.971562	0.481043	0.684537	0.715427
YDL165W	CDC36	0.898242	0.878833	0.871782	0.887201	1.08849	0.932609	1.0183	0.74966	0.959838	0.901685
YDL166C	FAP7	0.898242	0.878833	0.871782	0.887201	1.08849	0.932609	1.0183	0.725096	0.842458	0.879116
YDL167C	NRP1	0.950442	0.957956	0.982462	0.889633	1.01206	0.923454	0.963181	0.845849	0.97249	1.0093
YDL168W	SFA1	0.811343	0.743264	0.789675	0.835887	0.887431	0.873713	0.867776	0.764749	0.880143	0.924657
YDL169C	UGX2	0.991894	1.04655	1.0737	1.04659	1.13948	1.03054	1.10619	1.09785	1.24993	1.21257
YDL170W	UGA3	0.656297	0.488625	0.454465	0.582532	0.633803	0.591099	0.629005	0.809333	1.11598	0.949635
YDL171C	GLT1	0.656297	0.488625	0.454465	0.582532	0.633803	0.591099	0.629005	0.76496	0.97609	0.958459
YDL173W	YDL173W	1.29363	1.15635	0.672635	0.675415	0.785747	0.803332	0.881873	0.739104	0.755136	0.7795
YDL174C	DLD1	1.18567	1.04433	0.667073	0.62897	0.8153	0.797732	0.799503	0.754463	0.861307	0.934304
YDL175C	AIR2	0.901348	0.73222	0.672527	0.747025	0.908042	0.797718	0.851542	0.656636	0.918064	0.948742
YDL176W	YDL176W	0.985999	0.920348	0.878374	1.0483	1.08496	1.02461	1.06773	0.737071	0.772428	0.905388
YDL177C	YDL177C	0.985999	0.920348	0.878374	1.0483	1.08496	1.02461	1.06773	0.785921	0.871326	1.04632
YDL178W	DLD2	0.879415	0.764973	0.955559	0.9222	0.969418	1.13287	0.967933	0.944128	0.906249	0.953347
YDL179W	PCL9	0.784944	0.765457	0.736299	0.745318	0.866326	0.822049	0.817386	0.992184	1.09619	1.17744
YDL180W	YDL180W	0.791921	0.689306	0.607723	0.793865	0.77056	0.781385	0.744976	0.95761	1.10671	1.13155
YDL181W	INH1	0.95346	0.747704	0.598388	0.572719	0.532056	0.596208	0.591765	1.05777	1.21002	1.1595
YDL182W	LYS20	0.509521	0.238126	0.226828	0.385228	0.234081	0.375837	0.282798	0.477782	0.756163	0.821939
YDL183C	YDL183C	1.01905	0.92904	0.842882	0.837167	0.934076	0.929494	1.0749	0.666808	0.820851	0.797242
YDL184C	RPL41A	0.526416	0.456844	0.445178	0.527935	0.64181	0.583953	0.688461	0.967657	1.10209	0.980767
YDL185W	TFP1	0.804798	0.760853	0.659146	0.706352	0.790465	0.74903	0.696278	0.857297	0.88906	0.986642
YDL186W	YDL186W	0.806283	0.781254	0.891337	0.967537	1.01808	0.9597	0.93562	0.762498	0.780452	0.937296
YDL188C	PPH22	0.867602	0.820098	0.784869	0.870726	1.01597	0.871484	0.916559	0.981849	1.02556	0.979273
YDL189W	RBS1	1.11813	1.03549	0.965197	0.948101	0.996298	0.999316	0.988339	0.862271	0.868158	1.01858
YDL190C	UFD2	1.11813	1.03549	0.965197	0.948101	0.996298	0.999316	0.988339	0.678464	0.900439	0.8473
YDL191W	RPL35A	0.574738	0.548087	0.551913	0.575385	0.655527	0.646414	0.634195	1.01662	1.12559	1.10723
YDL192W	ARF1	0.786865	0.712447	0.738851	0.698882	0.794671	0.757525	0.799338	0.814259	0.934978	0.918884
YDL193W	NUS1	0.654138	0.599679	0.643345	0.74226	0.823916	0.733981	0.831001	0.905383	1.03408	1.05444
YDL194W	SNF3	0.685929	0.707338	0.738703	0.872571	0.860243	0.87918	0.858191	0.710011	0.835686	0.838918
YDL195W	SEC31	1.0821	1.01703	0.836726	0.746278	0.8369	0.922494	0.940194	0.654439	0.678604	0.642917
YDL197C	ASF2	1.27464	1.23875	1.05602	1.00398	1.13839	1.10359	1.13173	0.954357	1.01363	1.06445
YDL198C	GGC1	0.861545	0.605475	0.589684	0.592779	0.579743	0.585927	0.780033	1.00262	1.07302	1.07156
YDL199C	YDL199C	0.927897	0.689835	0.814347	0.746388	0.864274	0.793526	0.85585	0.773911	0.896313	0.934177
YDL200C	MGT1	0.930777	0.975251	0.855548	0.924077	1.01466	1.00847	0.978693	0.601047	0.65342	0.617407
YDL201W	TRM8	0.771011	0.720889	0.771652	0.785287	0.876451	0.884745	0.798805	0.83951	0.952121	1.02016
YDL202W	MRPL11	0.762493	0.718154	0.634767	0.627771	0.760161	0.730778	0.783517	1.07059	1.14583	1.07303
YDL203C	ACK1	0.762493	0.718154	0.634767	0.627771	0.760161	0.730778	0.783517	0.806922	0.906621	0.787471
YDL204W	RTN2	1.10286	0.945736	1.00121	0.925451	1.08408	0.981992	1.07696	0.697495	0.882402	1.00704
YDL205C	HEM3	1.10286	0.945736	1.00121	0.925451	1.08408	0.981992	1.07696	1.01515	1.0042	1.0827
YDL206W	YDL206W	0.726295	0.653042	0.812785	0.773153	0.994213	0.842579	0.749634	0.894388	1.05919	1.01031
YDL207W	GLE1	0.705784	0.68877	0.804406	0.676016	0.726008	0.811051	0.775324	0.903689	0.856298	0.930381
YDL208W	NHP2	1.09469	1.08467	0.888078	0.867732	0.902273	1.00739	0.926529	0.866836	0.955407	0.909897
YDL209C	CWC2	1.09469	1.08467	0.888078	0.867732	0.902273	1.00739	0.926529	0.8938	0.874193	0.861348
YDL210W	UGA4	1.13702	1.13029	0.945074	0.967132	1.19993	1.1221	1.17144	0.70499	1.09021	1.14692
YDL211C	YDL211C	1.09898	1.08422	0.94495	1.09223	1.12311	1.0274	1.01738	0.722985	0.809989	1.03041
YDL212W	SHR3	0.922263	0.876881	0.780289	0.809476	0.968699	0.860057	0.91178	0.971174	0.963222	0.933848
YDL213C	NOP6	0.942617	0.964912	0.937412	0.929394	1.289	1.12913	1.16351	0.544565	0.69524	0.652828
YDL214C	PRR2	0.961263	1.04239	1.05911	0.950982	1.13841	1.05109	1.05759	0.433476	0.548842	0.533054
YDL215C	GDH2	0.90549	0.804881	0.644179	0.674176	0.790145	0.762283	0.777233	0.829571	1.00256	0.951651
YDL216C	RRI1	0.927537	0.870952	0.847482	0.9436	0.964091	0.964269	0.962203	0.819087	0.992946	1.07636
YDL217C	TIM22	0.893916	0.818873	0.82347	0.890577	1.01372	0.907393	0.891147	0.913021	0.899519	1.12592
YDL218W	YDL218W	0.870008	0.871847	0.824194	0.866283	0.981613	0.980941	0.94922	0.706585	0.799022	0.860092
YDL219W	DTD1	0.93941	0.922287	0.915288	0.922016	0.848567	0.9444	0.957758	0.807323	0.948271	0.981652
YDL220C	CDC13	0.93941	0.922287	0.915288	0.922016	0.848567	0.9444	0.957758	0.523294	0.776544	0.901555
YDL222C	FMP45	0.904557	0.723981	0.598584	0.544132	0.714434	0.713265	0.682092	1.05548	1.18058	1.36503
YDL223C	HBT1	1.23727	1.23191	0.863139	0.798327	0.773303	0.938419	0.838833	0.798383	0.849716	0.82131
YDL224C	WHI4	0.35134	0.289781	0.311675	0.388973	0.452321	0.365797	0.430514	1.25369	1.28278	1.30303
YDL225W	SHS1	1.01166	0.983795	0.918852	0.873474	0.947661	0.983527	0.99386	0.708851	0.773557	0.90272
YDL226C	GCS1	1.01166	0.983795	0.918852	0.873474	0.947661	0.983527	0.99386	0.684637	0.755072	0.821653
YDL229W	SSB1	0.697019	0.704856	0.667981	0.617399	0.672405	0.723776	0.692979	0.941859	1.1193	1.12624
YDL230W	PTP1	0.878257	0.856013	0.711856	0.720902	0.768804	0.761742	0.82178	0.807887	0.864341	0.855543
YDL231C	BRE4	0.878257	0.856013	0.711856	0.720902	0.768804	0.761742	0.82178	0.807887	0.864341	0.855543
YDL232W	OST4	0.992766	0.940661	0.834772	0.812859	0.864246	0.816281	0.882183	0.916681	1.05877	1.07836
YDL233W	YDL233W	0.992977	1.00689	0.769963	0.887431	0.972931	0.996565	0.896207	0.656723	0.739419	0.70375
YDL234C	GYP7	0.992977	1.00689	0.769963	0.887431	0.972931	0.996565	0.896207	0.676099	1.09339	0.858623
YDL235C	YPD1	0.776531	0.674919	0.709115	0.753789	0.84045	0.837072	0.855364	0.913676	0.959007	1.00264
YDL236W	PHO13	0.882968	0.873209	0.782135	0.919716	0.92432	0.930879	0.866916	0.715422	0.720486	0.73655
YDL237W	YDL237W	1.0797	0.985053	0.957166	1.0565	1.09746	1.08814	1.03566	0.710185	0.766243	0.677937
YDL238C	GUD1	1.0797	0.985053	0.957166	1.0565	1.09746	1.08814	1.03566	0.976538	0.98844	1.07358
YDL240W	LRG1	0.953667	0.933187	0.928771	0.886426	0.986111	0.953552	1.04793	0.799766	0.90367	0.943528
YDL241W	YDL241W	0.493072	0.484066	0.477286	0.591618	0.618733	0.575645	0.571448	0.619808	0.77483	0.846397
YDL243C	AAD4	1.21234	1.14115	0.962141	1.02033	1.07487	1.01616	1.05183	1.01645	1.09654	1.01043
YDL248W	COS7	0.504821	0.559126	0.4986	0.578564	0.541215	0.561427	0.51496	0.436818	0.47947	0.465287
YDR001C	NTH1	0.814565	0.609497	0.705434	0.739977	0.803509	0.778166	0.836172	0.627421	0.785921	0.798865
YDR002W	YRB1	0.814565	0.609497	0.705434	0.739977	0.803509	0.778166	0.836172	0.659677	0.794685	0.901073
YDR003W	RCR2	0.753994	0.736111	0.678757	0.731265	0.925538	0.819409	0.889916	0.43087	0.833077	0.760827
YDR003W-A	YDR003W-A	0.754858	0.737043	0.680869	0.733473	0.927645	0.820806	0.891694	0.76701	0.7737	0.861647
YDR004W	RAD57	0.836129	0.725171	0.737322	0.810768	0.920107	0.823493	0.894449	1.00991	1.16373	1.09296
YDR005C	MAF1	0.771724	0.66222	0.711104	0.741635	0.932383	0.766652	0.77485	0.989748	1.24186	1.20256
YDR006C	SOK1	0.926211	0.801502	0.710927	0.745666	0.829027	0.818957	0.905555	1.01173	1.01687	0.805301
YDR007W	TRP1	0.926211	0.801502	0.710927	0.745666	0.829027	0.818957	0.905555	0.730318	0.864942	1.01146
YDR009W	GAL3	1.61815	1.62542	1.53548	1.29698	1.35662	1.309	1.32606	0.788269	0.954362	1.1514
YDR011W	SNQ2	0.559122	0.482732	0.399059	0.510688	0.534647	0.57624	0.502592	1.01869	1.12506	1.25796
YDR012W	RPL4B	0.739684	0.677141	0.64239	0.75399	0.758863	0.732674	0.802894	0.737182	0.991342	0.90763
YDR013W	PSF1	0.772233	0.73055	0.87105	0.833323	1.0403	0.822965	0.910261	0.928619	0.905867	1.04588
YDR014W	RAD61	1.18704	1.06274	1.10076	1.04786	1.21305	1.1678	1.21534	0.994304	1.04862	1.00619
YDR016C	DAD1	0.929792	0.8792	0.873365	0.862791	1.00757	0.836773	0.950522	0.831942	0.950649	0.847799
YDR017C	KCS1	0.574403	0.592518	0.688705	0.693557	0.822875	0.769152	0.836812	0.579677	0.598924	0.621849
YDR018C	YDR018C	0.879193	0.797092	0.900187	0.912904	0.934446	0.883973	0.963853	0.819867	0.935236	0.922054
YDR019C	GCV1	0.98876	0.785275	0.835669	0.911013	0.922149	1.12574	1.00201	0.963087	0.976629	1.07278
YDR020C	YDR020C	0.872916	0.694642	0.857879	0.911039	1.04889	0.967792	0.910313	0.934597	0.898118	0.975776
YDR021W	FAL1	0.872916	0.694642	0.857879	0.911039	1.04889	0.967792	0.910313	0.987411	1.14025	1.04855
YDR022C	CIS1	0.836709	0.686435	0.692465	0.729413	0.953163	0.884007	0.912748	1.19385	1.25436	1.28412
YDR023W	SES1	0.699703	0.696062	0.714223	0.66081	0.860548	0.724548	0.841458	0.573965	0.981836	0.894015
YDR025W	RPS11A	0.426219	0.390837	0.48	0.505806	0.613237	0.567365	0.576162	0.947402	1.09822	1.07039
YDR026C	YDR026C	1.0617	0.8523	0.893631	0.89518	1.09878	1.03728	1.12614	1.19021	1.17461	1.20069
YDR027C	VPS54	0.947634	0.831578	0.794646	0.872134	0.944532	0.906159	0.923667	0.747968	0.948087	0.925002
YDR028C	REG1	0.855144	0.784428	0.831333	0.857578	1.10993	0.935078	1.01418	0.837567	0.937438	0.744835
YDR030C	RAD28	1.11308	1.06189	1.10333	1.12245	1.31374	1.28191	1.21025	0.7231	0.847995	0.945654
YDR031W	MIC14	1.11308	1.06189	1.10333	1.12245	1.31374	1.28191	1.21025	0.901493	0.932884	1.12818
YDR032C	PST2	0.924273	0.72761	0.755924	0.652024	0.87628	0.767383	0.845967	1.34037	1.3157	1.34429
YDR033W	MRH1	0.386586	0.358641	0.30197	0.854001	0.629293	0.849516	0.526773	0.761402	0.784981	0.829481
YDR034C	LYS14	1.06408	0.724006	0.597856	0.716062	0.863566	0.746405	0.770572	0.719802	0.882766	0.884157
YDR034C-A	YDR034C-A	0.530229	0.435429	0.584093	0.557074	0.695892	0.614647	0.632033	1.40097	1.4165	1.42752
YDR034W-B	YDR034W-B	0.530229	0.435429	0.584093	0.557074	0.695892	0.614647	0.632033	0.938017	0.963464	0.868605
YDR035W	ARO3	0.758662	0.579939	0.70778	0.643778	0.836482	0.747407	0.815451	1.5755	1.364	1.54886
YDR036C	EHD3	1.03661	0.840951	0.703237	0.807698	0.975408	0.805239	0.864728	1.03161	1.09177	1.05946
YDR037W	KRS1	0.767521	0.59394	0.546621	0.617744	0.750589	0.664376	0.753988	0.84898	1.00103	1.13333
YDR040C	ENA1	0.936736	0.518173	0.370102	0.714522	0.483698	0.884142	0.508266	0.582425	0.963397	0.931706
YDR041W	RSM10	1.05258	0.808005	0.699432	0.822203	0.986583	0.838709	0.989809	0.898011	1.06169	1.07341
YDR042C	YDR042C	0.837404	0.780658	0.831273	0.876182	1.0571	0.925462	0.99885	0.760445	0.873712	0.981989
YDR043C	NRG1	0.30091	0.191004	0.268069	0.442607	0.341273	0.484009	0.307615	0.941812	1.06864	1.01776
YDR044W	HEM13	1.2541	1.15734	1.08208	0.99814	1.21248	1.1245	1.14787	0.797488	0.940292	0.807122
YDR045C	RPC11	0.763308	0.629642	0.636706	0.697632	0.745095	0.741338	0.780208	1.01371	1.09184	1.27799
YDR046C	BAP3	0.455749	0.361183	0.326383	0.510786	0.44284	0.588669	0.416256	0.948206	1.12637	1.15072
YDR047W	HEM12	1.01966	0.825957	0.686551	0.697711	0.925981	0.908454	0.864753	0.867208	1.04231	0.957577
YDR049W	YDR049W	0.782394	0.756079	0.7303	0.768378	0.932083	0.767148	0.887131	0.845423	1.06124	0.957882
YDR050C	TPI1	0.542698	0.499431	0.57002	0.602271	0.823429	0.62136	0.774088	0.754265	0.837599	0.87941
YDR051C	YDR051C	0.884338	0.768201	0.831454	0.856719	1.05028	0.892224	0.911505	1.0038	1.05248	1.17855
YDR052C	DBF4	0.582877	0.544987	0.619007	0.610075	0.776686	0.68207	0.607411	1.08215	1.02282	0.845989
YDR054C	CDC34	0.826537	0.759777	0.67065	0.688169	0.853063	0.751792	0.952411	0.786959	0.827687	0.910214
YDR055W	PST1	0.706026	0.579775	0.524329	0.559439	0.656029	0.614535	0.775851	1.0682	0.965615	1.03298
YDR056C	YDR056C	1.06412	1.00169	1.04054	1.03277	1.13903	1.03798	1.0521	0.806536	0.831537	0.959208
YDR057W	YOS9	1.06412	1.00169	1.04054	1.03277	1.13903	1.03798	1.0521	0.861278	0.923915	1.0076
YDR058C	TGL2	0.516336	0.444232	0.500108	0.558908	0.636016	0.529515	0.63141	1.0699	1.21445	1.1067
YDR059C	UBC5	1.09247	0.816455	0.926623	0.87804	1.11921	0.895036	1.10186	0.92474	1.1029	1.01313
YDR060W	MAK21	0.954164	0.9367	1.01731	1.10989	1.06281	1.01207	1.10336	0.733693	0.861447	0.851327
YDR061W	YDR061W	0.788933	0.673926	0.671018	0.718022	0.721356	0.753346	0.758591	0.889815	0.994947	1.16183
YDR062W	LCB2	0.747849	0.635825	0.656458	0.743758	0.755784	0.768173	0.775796	1.10118	1.24888	1.16874
YDR063W	YDR063W	0.65017	0.571957	0.653076	0.723265	0.905621	0.768035	0.764321	0.733773	0.937086	0.867734
YDR064W	RPS13	0.604071	0.55909	0.676772	0.65024	0.771453	0.663221	0.810293	0.861604	0.994419	0.878537
YDR065W	YDR065W	0.897861	0.77906	0.921551	0.896496	0.981506	1.00085	1.1357	1.12632	1.10744	1.06131
YDR066C	YDR066C	1.29143	1.26303	1.19927	1.19545	1.21	1.26279	1.12326	0.908802	0.996686	1.14083
YDR067C	OCA6	1.12855	1.01611	1.09028	1.14189	1.31208	1.19148	1.19292	0.775289	0.917743	0.952976
YDR068W	DOS2	1.12855	1.01611	1.09028	1.14189	1.31208	1.19148	1.19292	0.748978	0.970364	1.00677
YDR069C	DOA4	0.903348	0.827616	0.777834	0.770839	0.886683	0.900531	0.884774	1.20862	1.21203	1.14172
YDR071C	PAA1	0.610341	0.522312	0.591087	0.630959	0.780689	0.650264	0.716507	0.710462	0.954464	0.938774
YDR072C	IPT1	0.329599	0.402358	0.362649	0.559405	0.481031	0.612991	0.536563	0.41557	0.447478	0.449421
YDR073W	SNF11	0.563581	0.556803	0.51352	0.692587	0.70342	0.721346	0.842801	0.788142	0.945608	0.889747
YDR074W	TPS2	0.79702	0.436439	0.521625	0.612411	0.832876	0.84287	0.864792	0.360501	0.533143	0.528516
YDR075W	PPH3	0.681768	0.642421	0.711077	0.77956	0.866737	0.863065	0.820754	1.07632	1.22048	1.03291
YDR076W	RAD55	0.510763	0.470055	0.63693	0.722626	0.795631	0.670342	0.778633	0.776648	0.915902	0.940902
YDR078C	SHU2	0.865256	0.838583	0.894953	0.946412	1.24653	0.931098	1.11516	0.739211	0.846998	0.884609
YDR079C-A	TFB5	1.10404	1.04325	1.11277	1.15431	1.2768	1.1874	1.21577	0.834272	0.933285	1.07712
YDR079W	PET100	0.865256	0.838583	0.894953	0.946412	1.24653	0.931098	1.11516	0.915165	0.968668	1.02719
YDR080W	VPS41	1.10404	1.04325	1.11277	1.15431	1.2768	1.1874	1.21577	0.881952	1.11936	1.24967
YDR081C	PDC2	1.12599	1.13396	0.998396	1.08816	1.08109	1.09493	1.1165	0.602487	0.702998	0.764881
YDR082W	STN1	1.12599	1.13396	0.998396	1.08816	1.08109	1.09493	1.1165	0.763028	0.695537	0.764823
YDR083W	RRP8	0.705606	0.758562	0.76674	0.767203	0.912428	0.875518	0.93721	0.553697	0.985261	0.903088
YDR084C	TVP23	1.07892	0.885689	0.908995	1.07111	0.998292	1.10559	0.946491	0.912284	1.03029	1.0219
YDR086C	SSS1	0.823147	0.84431	0.801749	0.826367	1.01937	0.868503	0.930977	0.665138	0.703864	0.705285
YDR087C	RRP1	0.923088	0.927105	0.889107	0.976309	0.928197	0.937509	0.968544	0.608219	0.667228	0.71949
YDR088C	SLU7	0.643143	0.612344	0.595407	0.638408	0.723836	0.715366	0.630386	0.731048	0.78499	0.766587
YDR089W	YDR089W	0.502051	0.518479	0.619082	0.797747	0.870227	0.883127	0.826122	0.564716	0.665681	0.668126
YDR090C	YDR090C	0.806234	0.758962	0.853345	0.87143	0.899326	0.899354	0.89612	0.847452	0.946912	1.11305
YDR091C	RLI1	0.918756	0.844376	0.778439	0.708064	0.776868	0.804015	0.719283	1.05691	1.1345	1.1618
YDR092W	UBC13	0.919474	0.942514	0.94932	1.06405	1.21482	1.02688	1.04559	0.5886	0.704093	0.644391
YDR093W	DNF2	0.647828	0.610786	0.612005	0.652576	0.797539	0.736082	0.795726	0.865458	0.935566	1.08838
YDR096W	GIS1	0.963794	0.821663	0.90325	0.982764	0.938773	1.02747	1.00192	1.19963	1.46907	1.28892
YDR097C	MSH6	0.835343	0.783285	0.790967	0.905494	0.879219	0.829932	0.862734	0.645261	0.907193	0.981392
YDR098C	GRX3	0.63706	0.641025	0.622843	0.656018	0.820014	0.685811	0.736646	0.798791	1.05161	0.823879
YDR099W	BMH2	0.688185	0.642767	0.687854	0.641839	0.771558	0.745308	0.764485	1.0402	1.17019	1.15795
YDR100W	TVP15	0.845328	0.697869	0.641228	0.674923	0.879329	0.882165	0.889866	0.627568	0.873552	1.03534
YDR101C	ARX1	0.678012	0.697219	0.741423	0.809999	0.886908	0.766436	0.839834	0.632934	0.702191	0.650944
YDR103W	STE5	0.678012	0.697219	0.741423	0.809999	0.886908	0.766436	0.839834	0.62951	0.704478	0.790721
YDR104C	SPO71	0.913504	0.897679	0.865	0.867575	0.918455	0.869342	0.931046	0.933784	1.04326	1.06404
YDR105C	TMS1	0.993685	0.997738	0.928715	1.06876	1.01348	0.963605	1.06417	0.720286	0.738163	0.811254
YDR106W	ARP10	0.993685	0.997738	0.928715	1.06876	1.01348	0.963605	1.06417	0.720286	0.738163	0.811254
YDR107C	YDR107C	0.926043	1.04062	0.877404	0.914841	1.00438	0.943831	0.947117	0.449043	0.56419	0.542755
YDR108W	GSG1	0.926043	1.04062	0.877404	0.914841	1.00438	0.943831	0.947117	0.449043	0.56419	0.542755
YDR109C	YDR109C	0.989114	0.952246	0.942231	0.874109	0.987878	0.90946	1.10502	0.774514	0.927082	0.874315
YDR110W	FOB1	0.910987	0.852807	0.925932	0.925905	1.03498	1.03495	1.09504	0.732428	0.932937	1.02326
YDR111C	ALT2	0.78296	0.591127	0.640655	0.722426	0.815106	0.744041	0.834017	1.13834	1.18592	0.925029
YDR113C	PDS1	0.704488	0.714838	0.634517	0.726803	0.85448	0.756143	0.845983	0.889527	0.947489	0.921247
YDR114C	YDR114C	0.707898	0.6937	0.953581	0.906025	0.927026	0.869351	0.962123	0.852351	0.908074	0.994706
YDR115W	YDR115W	0.886719	0.835783	0.71235	0.839215	0.869191	0.791002	0.84497	0.904609	0.946781	0.937584
YDR116C	MRPL1	0.833215	0.82996	0.740243	0.87038	0.808717	0.880734	0.936225	0.952412	1.04685	0.969773
YDR117C	TMA64	1.05112	0.984776	0.961685	1.04408	1.01945	1.06549	0.955843	0.749837	1.02751	0.784474
YDR118W	APC4	1.05112	0.984776	0.961685	1.04408	1.01945	1.06549	0.955843	0.757481	0.860051	0.752143
YDR119W	YDR119W	0.730407	0.722088	0.669923	0.769437	0.779428	0.821538	0.738195	0.721353	0.755806	0.809002
YDR119W-A	YDR119W-A	0.711134	0.631511	0.57314	0.697434	0.705258	0.711272	0.672024	1.07833	1.17291	1.15517
YDR120C	TRM1	0.710642	0.722065	0.76187	0.842072	1.03801	0.906933	0.919503	0.658746	0.807581	0.796412
YDR121W	DPB4	0.710642	0.722065	0.76187	0.842072	1.03801	0.906933	0.919503	0.459976	0.619599	0.891164
YDR122W	KIN1	1.06603	1.00258	0.789062	0.788818	0.786746	0.824406	0.875932	0.975433	1.04705	0.97169
YDR123C	INO2	0.853522	0.939844	0.680499	0.814716	0.914435	0.814001	0.819481	0.652756	0.817415	0.784669
YDR124W	YDR124W	0.853522	0.939844	0.680499	0.814716	0.914435	0.814001	0.819481	0.359253	0.630395	0.615629
YDR125C	ECM18	0.769988	0.669008	0.686197	0.738364	0.952579	0.806921	0.851849	1.02347	0.974637	1.15706
YDR126W	SWF1	1.11333	0.9169	0.834237	0.848446	1.13015	0.923509	1.05164	0.927694	1.16375	1.21599
YDR127W	ARO1	0.925387	0.424035	0.36796	0.463771	0.55635	0.478059	0.608358	0.607715	0.606795	0.718818
YDR128W	YDR128W	0.934467	0.793519	0.701151	0.855927	0.848342	0.870349	0.831895	1.15294	1.06694	1.09073
YDR129C	SAC6	0.712233	0.659839	0.658478	0.75443	0.802694	0.775083	0.762944	0.77322	1.0245	0.885796
YDR130C	FIN1	1.16225	1.04493	0.989872	1.06098	1.07265	1.15298	1.18195	0.739325	0.865472	0.904181
YDR131C	YDR131C	0.731323	0.678644	0.691065	0.910391	0.964162	0.92304	0.93634	0.905852	0.996253	1.0781
YDR135C	YCF1	1.03635	0.9732	0.865898	0.952901	0.893494	0.91514	0.983659	0.831617	1.00676	0.901551
YDR137W	RGP1	1.20691	1.07918	1.04441	1.06124	1.04314	1.13792	1.04173	0.843109	0.891679	1.20167
YDR138W	HPR1	0.881688	0.85267	0.784366	0.835486	0.892626	0.866162	0.842407	0.754476	0.745288	0.89395
YDR139C	RUB1	0.939386	0.854243	0.845359	0.92029	1.0457	1.00107	0.936909	0.819654	0.981452	0.943272
YDR140W	MTQ2	0.939386	0.854243	0.845359	0.92029	1.0457	1.00107	0.936909	1.12849	1.12169	1.11492
YDR141C	DOP1	0.888062	0.784608	0.865641	0.902947	1.04335	0.991082	0.954296	0.861324	1.06391	0.990695
YDR142C	PEX7	0.697376	0.631688	0.637149	0.821577	0.879395	0.780847	0.751092	0.993447	1.05836	1.00382
YDR143C	SAN1	0.620263	0.655611	0.683551	0.812689	0.77474	0.751231	0.841231	0.701054	0.721235	0.639492
YDR144C	MKC7	0.779032	0.718105	0.712559	0.805848	0.860714	0.860605	0.805882	0.782968	0.892383	1.04706
YDR145W	TAF12	1.14602	1.10987	0.810217	0.892989	0.98751	0.951971	0.922043	0.839324	0.864364	0.913677
YDR146C	SWI5	0.806846	0.876532	0.82842	0.901414	1.05348	0.980341	1.03283	0.471759	0.721106	0.667763
YDR147W	EKI1	0.806846	0.876532	0.82842	0.901414	1.05348	0.980341	1.03283	0.471759	0.721106	0.667763
YDR148C	KGD2	1.04785	0.980001	0.830832	0.876207	1.05644	0.891663	0.926607	1.10539	1.1688	1.08816
YDR150W	NUM1	1.04785	0.980001	0.830832	0.876207	1.05644	0.891663	0.926607	0.422809	0.719358	0.72429
YDR151C	CTH1	0.685561	0.676033	0.629548	0.621559	0.84543	0.64116	0.828799	0.621991	0.940459	0.99032
YDR152W	GIR2	0.685561	0.676033	0.629548	0.621559	0.84543	0.64116	0.828799	0.621991	0.940459	0.99032
YDR155C	CPR1	0.654484	0.591903	0.510393	0.541649	0.656845	0.682206	0.700567	1.11707	1.0084	1.03116
YDR156W	RPA14	0.654484	0.591903	0.510393	0.541649	0.656845	0.682206	0.700567	1.13878	1.22145	1.15327
YDR158W	HOM2	0.69318	0.503416	0.511559	0.451801	0.569295	0.45744	0.648551	0.467595	0.640737	0.722087
YDR159W	SAC3	0.655495	0.625254	0.697601	0.61614	0.801595	0.662421	0.796561	1.01411	1.06079	1.11009
YDR160W	SSY1	0.742141	0.76926	0.820991	0.866653	0.967797	0.929276	0.837835	0.598737	0.655051	0.696794
YDR161W	YDR161W	0.61935	0.606038	0.715979	0.734325	0.815234	0.748767	0.736976	0.778567	0.873451	0.810554
YDR162C	NBP2	1.10959	1.06401	1.07536	1.02047	1.14836	1.15617	1.18711	0.77633	0.833567	0.910283
YDR163W	CWC15	1.10959	1.06401	1.07536	1.02047	1.14836	1.15617	1.18711	0.943802	0.896574	0.875458
YDR164C	SEC1	1.15971	1.16937	1.09152	1.06402	1.18883	1.13849	1.22994	0.78491	0.894031	0.880325
YDR165W	TRM82	0.891064	0.922065	0.899336	0.950068	0.961393	0.876431	1.01314	0.514263	0.641684	0.743686
YDR166C	SEC5	1.17721	1.11284	1.10122	1.14755	1.22101	1.19805	1.15483	0.837679	0.862792	0.826104
YDR167W	TAF10	1.17721	1.11284	1.10122	1.14755	1.22101	1.19805	1.15483	0.813533	0.943095	1.0083
YDR168W	CDC37	1.10669	1.07309	0.989051	0.936796	1.01454	1.01997	1.03416	0.861718	0.90036	1.07929
YDR169C	STB3	1.03552	0.961128	0.813482	0.793267	0.938643	0.971118	0.943806	0.909599	1.05028	0.924395
YDR170C	SEC7	0.68504	0.585496	0.57027	0.64501	0.82501	0.78367	0.800953	1.19365	1.1933	1.17802
YDR171W	HSP42	0.883556	0.70509	0.628066	0.632408	0.66746	0.782314	0.73743	1.03254	1.03745	1.21469
YDR172W	SUP35	0.925081	0.913492	0.896685	0.886541	1.01976	0.923511	0.990825	0.698638	0.880775	1.01105
YDR173C	ARG82	0.677203	0.688366	0.530217	0.567964	0.70997	0.64205	0.678284	0.544055	0.844132	0.754156
YDR174W	HMO1	0.677203	0.688366	0.530217	0.567964	0.70997	0.64205	0.678284	0.584025	0.674939	0.78976
YDR175C	RSM24	1.12685	1.03085	0.827842	0.888363	1.18745	0.981732	0.977604	0.987692	0.819821	0.832757
YDR176W	NGG1	1.12685	1.03085	0.827842	0.888363	1.18745	0.981732	0.977604	0.841804	0.92238	0.780819
YDR177W	UBC1	0.72015	0.699976	0.732514	0.728612	0.78819	0.832661	0.770141	0.942018	1.12426	1.07319
YDR178W	SDH4	0.829022	0.743829	0.735073	0.72854	0.822306	0.810326	0.768062	0.921826	1.05973	1.11799
YDR179C	CSN9	0.908906	0.861881	1.13256	1.10264	1.15447	1.07952	1.17412	0.843583	1.00793	1.03912
YDR179W-A	YDR179W-A	0.908906	0.861881	1.13256	1.10264	1.15447	1.07952	1.17412	0.410817	0.578571	0.59922
YDR180W	SCC2	0.924029	0.880882	0.872723	0.84183	0.796217	0.953716	0.882766	0.998726	1.07098	1.18266
YDR181C	SAS4	0.743323	0.744812	0.815008	0.961425	1.02474	1.04265	0.91495	0.588573	0.74872	0.720201
YDR182W	CDC1	0.743323	0.744812	0.815008	0.961425	1.02474	1.04265	0.91495	0.678718	0.73128	0.806628
YDR183W	PLP1	1.02704	0.967844	1.04978	1.1047	1.23924	1.14139	1.13173	0.885739	1.05878	0.921308
YDR184C	ATC1	0.653921	0.719394	0.789092	0.836823	0.834526	0.807967	0.810249	0.362179	0.486829	0.543321
YDR185C	YDR185C	0.567459	0.565023	0.562805	0.648529	0.747783	0.691978	0.692841	0.566621	0.746864	0.903374
YDR186C	YDR186C	0.82296	0.823826	0.617952	0.739147	0.756032	0.805676	0.865364	0.651732	0.946914	0.855845
YDR188W	CCT6	0.656172	0.641218	0.5133	0.553021	0.582233	0.619845	0.609353	0.937189	0.978225	1.18886
YDR189W	SLY1	0.593814	0.617377	0.569845	0.621126	0.771737	0.708403	0.610418	0.628389	0.760197	0.772392
YDR190C	RVB1	0.858127	0.991036	0.795315	0.906925	0.967673	0.903873	0.981514	0.437333	0.606004	0.648971
YDR191W	HST4	0.858127	0.991036	0.795315	0.906925	0.967673	0.903873	0.981514	0.437333	0.606004	0.648971
YDR192C	NUP42	1.05372	1.11306	0.9326	0.992329	1.05366	1.05089	1.06822	0.603528	0.724268	0.684999
YDR194C	MSS116	0.861163	0.820136	0.848934	0.934334	1.04655	0.931851	0.972403	0.806116	0.907381	1.10684
YDR194W-A	YDR194W-A	0.861163	0.820136	0.848934	0.934334	1.04655	0.931851	0.972403	0.871598	1.02647	1.11085
YDR195W	REF2	0.688136	0.657213	0.677661	0.698707	0.930231	0.800463	0.833839	0.846877	0.852164	0.840887
YDR196C	YDR196C	0.999777	0.957989	0.902798	0.925921	1.03518	1.06363	0.945391	0.593913	0.749577	0.842151
YDR197W	CBS2	0.999777	0.957989	0.902798	0.925921	1.03518	1.06363	0.945391	0.717853	0.796782	0.78349
YDR198C	RKM2	0.93983	0.926635	0.863493	1.06783	1.05674	0.995068	0.996097	0.973646	0.956468	0.959844
YDR200C	VPS64	1.2403	1.2528	1.02194	1.11984	1.17625	1.1529	1.17034	0.751075	0.789977	0.741361
YDR201W	SPC19	1.2403	1.2528	1.02194	1.11984	1.17625	1.1529	1.17034	0.631379	0.677231	0.715751
YDR202C	RAV2	1.0892	1.1392	1.0656	0.995523	1.34323	1.07289	1.09101	0.629314	0.797719	0.765498
YDR204W	COQ4	1.0892	1.1392	1.0656	0.995523	1.34323	1.07289	1.09101	0.558925	0.752806	0.798127
YDR205W	MSC2	1.07843	1.09153	0.882828	0.941522	0.91342	0.955415	0.897252	0.774507	0.834921	0.899992
YDR206W	EBS1	0.737082	0.730863	0.753391	0.769596	0.89941	0.77895	0.813571	0.757824	0.830354	0.796148
YDR207C	UME6	1.22894	1.21027	0.866363	0.680484	0.842211	0.834309	0.902309	0.889324	0.934831	1.0461
YDR208W	MSS4	0.879788	0.83783	0.553807	0.60933	0.819228	0.671492	0.805964	0.769799	0.901797	0.952593
YDR210W	YDR210W	0.950001	0.809474	0.650252	0.786535	0.875289	0.786143	0.890709	1.08134	1.17513	1.167
YDR211W	GCD6	0.516283	0.486214	0.491032	0.52972	0.621872	0.551392	0.533976	0.973909	1.15418	1.1528
YDR212W	TCP1	0.681625	0.683395	0.693412	0.701689	0.835047	0.772807	0.790176	0.718229	0.853515	0.795312
YDR213W	UPC2	1.00019	0.836312	0.693967	0.83017	0.835514	0.876386	0.843477	0.813572	1.0394	1.10827
YDR214W	AHA1	0.75527	0.766835	0.522823	0.711959	0.713849	0.663969	0.696625	0.59059	0.649007	0.645766
YDR216W	ADR1	0.919491	1.06591	1.14047	0.986608	0.893706	0.994973	0.942458	0.360973	0.527086	0.50872
YDR217C	RAD9	1.16075	1.17262	1.06485	1.13834	1.03191	1.12258	1.08675	0.715908	0.791726	0.90486
YDR218C	SPR28	0.876016	0.784329	0.927683	0.884372	1.02748	0.904064	0.948756	0.865763	0.951478	0.907298
YDR219C	MFB1	1.18609	1.09567	0.990685	1.21915	1.14817	1.1267	1.12281	0.68428	0.890212	0.71838
YDR221W	GTB1	1.18609	1.09567	0.990685	1.21915	1.14817	1.1267	1.12281	0.68428	0.890212	0.71838
YDR222W	YDR222W	0.702815	0.644255	0.620723	0.556577	0.713239	0.645383	0.754748	0.97997	1.16741	1.24407
YDR223W	CRF1	1.07758	0.960031	0.945857	0.944872	1.22994	1.07984	1.1907	0.849218	0.875444	0.840385
YDR226W	ADK1	0.776389	0.623162	0.564297	0.691279	0.804009	0.701472	0.797694	0.744543	1.08277	0.969497
YDR227W	SIR4	0.791816	0.74352	0.797905	0.872798	1.05335	0.941639	0.958637	1.03721	1.05121	1.0528
YDR228C	PCF11	0.990235	0.955011	0.900285	0.945906	1.09861	0.973817	1.02508	0.936914	1.03735	1.04835
YDR229W	IVY1	0.979115	0.855803	0.822145	0.918265	1.0716	0.963054	0.896724	1.07901	1.15316	1.11495
YDR231C	COX20	1.0171	0.997058	0.741904	0.67491	0.75111	0.762243	0.774022	1.00414	1.06414	1.03092
YDR232W	HEM1	1.0171	0.997058	0.741904	0.67491	0.75111	0.762243	0.774022	0.782981	0.788024	0.886419
YDR233C	RTN1	0.62219	0.529658	0.585967	0.641313	0.801788	0.727736	0.792001	0.950477	1.0967	1.21694
YDR234W	LYS4	0.282456	0.224652	0.272812	0.296585	0.366037	0.310854	0.360827	0.948406	1.3258	1.13984
YDR235W	PRP42	0.714631	0.67785	0.695163	0.812217	0.95474	0.744311	0.778433	0.837442	0.932513	1.23918
YDR236C	FMN1	1.26714	1.36719	1.1888	1.07648	1.08194	1.04782	1.03368	0.523508	0.623361	0.667084
YDR237W	MRPL7	1.11601	1.05006	0.971812	1.2011	1.30456	1.17414	1.17558	0.927133	1.04165	1.06371
YDR238C	SEC26	1.14936	1.02581	0.92726	0.954774	1.00747	0.89075	0.97461	0.877262	1.03877	0.881
YDR239C	YDR239C	0.879164	0.899478	0.93028	0.966486	1.0241	1.05675	1.09238	0.77539	0.894347	0.834158
YDR240C	SNU56	0.991325	0.977956	1.01594	1.16793	1.26043	1.15735	1.21699	0.720288	0.912157	0.927742
YDR242W	AMD2	0.822118	0.701642	0.730243	0.810091	1.00195	0.860708	0.99718	0.743477	0.944647	0.988624
YDR243C	PRP28	0.883546	0.942058	0.884933	0.937637	1.06449	0.96915	1.0724	0.398702	0.51897	0.608996
YDR244W	PEX5	0.883546	0.942058	0.884933	0.937637	1.06449	0.96915	1.0724	0.597487	0.631407	0.815695
YDR245W	MNN10	0.666126	0.622881	0.773197	0.869549	0.881053	0.837407	0.952568	0.803324	1.04469	1.04872
YDR246W	TRS23	0.717188	0.695737	0.722186	0.738462	0.96857	0.789319	0.905995	0.798378	1.00699	0.942627
YDR247W	VHS1	0.894942	0.748508	0.642983	0.819479	0.803779	0.815713	0.766486	0.940329	1.02761	0.98864
YDR248C	YDR248C	0.873354	0.895923	0.952809	1.06168	1.2588	1.12095	1.16668	0.654154	0.849942	0.773327
YDR249C	YDR249C	0.926567	0.901997	0.709925	0.780778	0.970058	0.902477	0.88573	0.876195	0.973286	1.05269
YDR251W	PAM1	0.926567	0.901997	0.709925	0.780778	0.970058	0.902477	0.88573	0.876195	0.973286	1.05269
YDR252W	BTT1	0.764877	0.70461	0.833549	0.870578	0.966504	0.910441	0.923993	1.06127	1.12925	1.12897
YDR253C	MET32	0.66432	0.714886	0.723129	0.770454	0.953855	0.732896	0.834286	0.654138	0.739651	0.756371
YDR254W	CHL4	0.66432	0.714886	0.723129	0.770454	0.953855	0.732896	0.834286	0.51601	0.649356	0.682717
YDR255C	RMD5	0.797597	0.815906	0.806687	0.881039	1.0023	0.88586	1.02405	0.694991	0.830661	0.874465
YDR256C	CTA1	0.797424	0.795635	0.814848	0.932521	0.952858	0.777836	0.937015	0.754597	0.684572	0.826185
YDR257C	SET7	0.660887	0.595399	0.61754	0.717783	0.829759	0.68014	0.796252	1.05815	1.24219	1.27138
YDR258C	HSP78	0.596642	0.556474	0.43975	0.540212	0.70448	0.519852	0.664828	0.880901	1.11423	1.47766
YDR259C	YAP6	0.207954	0.125291	0.159052	0.561977	0.218062	0.494918	0.16136	0.303345	0.496674	0.619616
YDR260C	SWM1	0.947475	0.854716	0.817609	0.868298	1.05352	0.93309	1.0879	0.91811	0.891007	0.908662
YDR261C	EXG2	0.840221	0.690222	0.70607	0.884596	0.918925	0.958881	0.937216	0.812022	0.685547	0.76122
YDR262W	YDR262W	0.480999	0.41479	0.482997	0.469067	0.596703	0.450073	0.569432	1.2227	1.17262	1.41911
YDR263C	DIN7	0.81377	0.805892	0.90176	1.03344	0.99406	0.931916	1.02505	0.71306	0.904366	0.865947
YDR264C	AKR1	0.970605	0.97142	0.867411	0.874121	1.16457	0.944115	1.02792	0.787371	0.939348	0.96384
YDR265W	PEX10	0.970605	0.97142	0.867411	0.874121	1.16457	0.944115	1.02792	0.743466	0.863715	0.81877
YDR266C	YDR266C	0.85748	0.742622	0.743551	0.790937	0.79932	0.839457	0.806949	0.777559	0.952547	1.1207
YDR267C	CIA1	0.96984	0.866287	0.882374	1.03942	0.915533	0.944035	0.990987	1.23908	1.20611	1.36697
YDR268W	MSW1	1.08494	1.02264	0.957903	1.10789	1.09825	1.06859	1.14535	0.955879	0.986501	1.03814
YDR270W	CCC2	1.14006	1.09704	0.851557	0.845304	0.866486	0.909801	0.932475	0.949317	1.11893	1.11959
YDR272W	GLO2	0.611698	0.594587	0.664673	0.75099	0.98926	0.740325	0.752028	0.830241	0.831889	0.993665
YDR273W	DON1	0.835303	0.724287	0.816356	0.879359	0.999044	0.915541	1.00689	0.889405	0.98879	1.12471
YDR275W	BSC2	0.928967	0.912628	0.749851	0.785208	0.989917	0.87878	0.899872	0.830782	0.995545	0.950969
YDR276C	PMP3	0.496902	0.489656	0.394279	0.391754	0.540974	0.504659	0.57075	0.845898	0.902344	0.814075
YDR277C	MTH1	0.534514	0.501429	0.542102	0.718138	0.645906	0.712098	0.521722	0.652239	0.828402	0.76568
YDR279W	RNH202	1.03096	0.955431	0.956767	1.05145	1.12465	1.0473	1.10951	1.10419	1.17014	1.06519
YDR280W	RRP45	0.836038	0.786416	0.798789	0.907767	1.00828	0.928914	0.908014	1.04236	1.05765	0.893471
YDR281C	PHM6	1.01844	0.942191	0.922903	1.03019	0.967844	1.07402	1.03256	0.997223	1.09138	1.27944
YDR282C	YDR282C	1.19289	1.07364	1.08926	1.12288	1.2328	1.2538	1.12664	0.842971	0.812264	0.767226
YDR283C	GCN2	0.698012	0.625888	0.645941	0.737217	0.864585	0.766087	0.764189	0.718165	0.824934	0.950941
YDR284C	DPP1	0.798747	0.692975	0.668433	0.83219	0.993818	0.857891	0.966476	0.764449	0.991166	1.02745
YDR285W	ZIP1	0.798747	0.692975	0.668433	0.83219	0.993818	0.857891	0.966476	0.961986	1.04062	1.07731
YDR286C	YDR286C	1.10203	1.07544	1.05489	0.997108	1.22363	1.16912	1.028	0.735506	0.880583	0.95441
YDR287W	YDR287W	1.10203	1.07544	1.05489	0.997108	1.22363	1.16912	1.028	0.795996	0.941566	0.952576
YDR288W	NSE3	1.08917	0.926184	0.873183	0.914239	0.956294	1.01762	0.993978	1.07579	1.10036	1.08848
YDR289C	RTT103	0.851864	0.885592	0.962826	0.955116	1.12596	0.991099	0.991367	0.523045	0.734951	0.778813
YDR291W	HRQ1	0.851864	0.885592	0.962826	0.955116	1.12596	0.991099	0.991367	0.500822	0.647243	0.619144
YDR292C	SRP101	0.668175	0.690779	0.666909	0.738845	0.807153	0.818667	0.84267	0.689849	0.939484	0.876566
YDR293C	SSD1	0.880955	0.759393	0.661766	0.797303	0.998488	0.83734	0.933005	1.03125	1.18295	1.19894
YDR294C	DPL1	0.884882	0.87506	0.874702	0.969625	1.02315	0.883517	0.941786	0.715018	0.8369	0.927938
YDR295C	HDA2	0.724817	0.666593	0.674229	0.663404	0.872733	0.875561	0.707003	0.957239	0.994373	1.00897
YDR296W	MHR1	0.724817	0.666593	0.674229	0.663404	0.872733	0.875561	0.707003	0.959567	1.0205	0.9906
YDR297W	SUR2	0.804733	0.771486	0.648991	0.778344	0.744256	0.77614	0.75981	0.963281	1.05728	1.08867
YDR298C	ATP5	0.866946	0.812796	0.805883	0.838371	1.0343	0.883882	0.966592	1.0155	1.11685	0.929316
YDR299W	BFR2	0.947303	0.903802	0.929784	0.925222	1.11214	1.03069	1.06984	0.916055	0.983047	0.904196
YDR300C	PRO1	0.917727	0.948328	0.881491	0.826929	0.935217	0.873019	0.892262	0.417007	0.589003	0.486877
YDR301W	CFT1	1.3368	1.28078	1.02823	1.0256	1.06217	1.08265	1.0954	0.919086	1.0754	1.05283
YDR302W	GPI11	1.012	0.896502	0.94166	0.857346	0.981982	0.925957	0.848343	0.957021	1.1592	1.00637
YDR303C	RSC3	1.17943	1.18018	0.933953	0.804064	0.99484	0.94457	0.914935	0.824292	0.927481	0.805268
YDR304C	CPR5	0.954407	0.826076	0.792041	0.862526	0.963529	0.943758	0.962111	0.937269	0.89012	1.26088
YDR305C	HNT2	0.876374	0.873533	0.995258	0.985458	0.963128	0.934798	1.06812	0.780492	0.854676	0.842121
YDR306C	YDR306C	0.952033	0.782612	0.808002	0.880216	0.926928	1.09424	1.11136	0.885399	0.99865	1.09257
YDR307W	YDR307W	0.592632	0.532145	0.560975	0.604456	0.644073	0.729634	0.713495	0.778377	0.901494	1.07765
YDR308C	SRB7	0.856472	0.752896	0.898825	0.884716	1.07224	0.965003	1.0301	0.96177	1.18681	1.02069
YDR309C	GIC2	0.39889	0.369255	0.333581	0.478991	0.412302	0.549462	0.438936	0.870039	0.944278	0.912613
YDR310C	SUM1	0.831442	0.772403	0.74099	0.670323	0.8835	0.915802	0.814336	0.789786	0.961723	0.989279
YDR311W	TFB1	1.02129	0.963382	0.920487	0.858931	0.924544	0.958745	0.940965	0.975883	1.09385	1.01747
YDR312W	SSF2	1.02702	1.0981	0.963904	0.966947	0.856065	0.965479	0.948215	0.444528	0.595763	0.744154
YDR313C	PIB1	0.797857	0.755892	0.683484	0.671494	0.794	0.797514	0.75412	1.05394	1.21362	0.99991
YDR314C	RAD34	0.917496	0.976874	0.934766	1.02029	1.05501	1.0516	1.07872	0.502986	0.625781	0.682202
YDR315C	IPK1	1.0074	1.04917	0.880951	0.944217	1.03959	0.994334	1.02371	0.973857	0.930401	1.08258
YDR316W	OMS1	1.0074	1.04917	0.880951	0.944217	1.03959	0.994334	1.02371	0.644378	0.797252	0.756022
YDR317W	HIM1	0.582222	0.561867	0.732157	0.819302	0.941549	0.842693	0.847038	0.813017	0.996908	0.826189
YDR318W	MCM21	0.944908	0.933309	0.911748	1.06917	1.07587	1.03149	0.929825	0.720744	0.813476	0.722355
YDR319C	YDR319C	0.709197	0.702354	0.645547	0.758134	0.863802	0.755885	0.840665	0.735483	0.863134	0.946896
YDR320C	SWA2	1.17076	1.21234	1.07547	1.06098	1.07659	1.05763	1.16091	0.565894	0.755652	0.764354
YDR320C-A	DAD4	0.959381	0.999029	0.88468	0.925068	0.957454	0.896701	0.91278	0.597255	0.803023	0.694978
YDR321W	ASP1	0.959381	0.999029	0.88468	0.925068	0.957454	0.896701	0.91278	0.616887	0.702226	0.713908
YDR322C-A	TIM11	0.901188	0.830908	0.857538	0.854243	0.955076	0.958945	0.950588	1.00115	1.05123	0.951282
YDR322W	MRPL35	0.7867	0.728794	0.805876	0.865391	0.96896	0.819483	0.855661	1.15716	1.05011	1.25805
YDR323C	PEP7	1.01115	0.922772	1.04759	1.04957	1.052	1.05026	1.03968	1.04646	1.10402	1.12721
YDR324C	UTP4	0.877613	0.85538	0.854442	0.942881	0.981353	0.931571	1.0068	0.752894	0.795679	0.855393
YDR325W	YCG1	1.01699	1.01855	0.897943	1.03637	1.0837	1.02799	0.995433	0.866252	0.85952	0.913529
YDR326C	YSP2	0.955624	0.919895	0.751898	0.936847	0.881454	0.84573	0.884006	0.939461	1.05142	0.983385
YDR328C	SKP1	1.09219	0.997114	0.856607	0.835084	0.940136	0.959876	0.967932	1.06078	1.20336	1.00832
YDR329C	PEX3	1.36642	1.26533	1.04951	1.02615	0.970856	1.06202	1.0301	0.89727	1.16006	1.10181
YDR330W	UBX5	1.36642	1.26533	1.04951	1.02615	0.970856	1.06202	1.0301	0.921335	0.911358	1.22909
YDR331W	GPI8	0.89935	0.84713	0.829689	0.811484	0.948394	0.93592	0.953046	0.864926	0.967164	0.906416
YDR332W	IRC3	0.854199	0.893274	0.91419	0.973838	1.00225	1.03111	0.895154	0.486248	0.827867	0.79105
YDR333C	YDR333C	0.697171	0.597832	0.584558	0.676345	0.798108	0.640406	0.686619	1.01515	1.0042	1.0827
YDR334W	SWR1	0.697171	0.597832	0.584558	0.676345	0.798108	0.640406	0.686619	0.939297	0.959812	0.844439
YDR335W	MSN5	0.978976	0.871298	0.858689	0.855172	0.995861	0.87875	0.96737	0.95456	1.026	1.06237
YDR336W	YDR336W	0.95015	0.792424	0.82326	0.909876	0.978116	0.970439	0.912335	0.41197	0.518061	0.614712
YDR337W	MRPS28	1.12112	0.987366	1.05646	1.06045	1.09321	1.11064	1.05617	1.07148	1.14942	1.20668
YDR338C	YDR338C	1.04181	1.0232	0.917476	0.996417	1.20978	1.08435	1.13632	0.747225	0.978812	1.06632
YDR339C	FCF1	0.784394	0.677619	0.767571	0.742844	1.00691	0.876916	0.987582	0.782754	0.77341	0.882084
YDR341C	YDR341C	0.958974	0.706832	0.717769	0.766125	0.840683	0.666595	0.836674	0.967334	1.04712	0.88664
YDR343C	HXT6	0.614504	0.598681	0.618786	0.745094	0.628969	0.589634	0.452528	0.636902	0.782734	0.810963
YDR345C	HXT3	0.413479	0.416163	0.313079	0.554743	0.496631	0.521025	0.431804	0.639485	0.7401	0.860371
YDR346C	SVF1	0.961257	0.954828	0.845024	0.856281	0.974879	0.843043	0.85443	0.574689	0.761656	0.723436
YDR347W	MRP1	0.961257	0.954828	0.845024	0.856281	0.974879	0.843043	0.85443	0.517106	0.643297	0.893524
YDR348C	YDR348C	0.848004	0.839809	0.778866	0.805678	0.920944	0.858806	0.79297	0.595781	0.82884	0.834962
YDR349C	YPS7	1.04543	0.850933	0.885925	0.915648	0.865907	0.983848	0.911826	1.11423	1.18425	1.33261
YDR350C	TCM10	0.915637	0.802633	0.78828	0.837855	0.911897	0.853279	0.872577	0.862044	1.01815	0.975087
YDR351W	SBE2	0.915637	0.802633	0.78828	0.837855	0.911897	0.853279	0.872577	0.902429	1.03935	0.956501
YDR352W	YDR352W	0.662451	0.600722	0.626907	0.714822	0.72844	0.70122	0.692815	0.7093	0.879176	0.844773
YDR353W	TRR1	0.887577	0.780567	0.608599	0.787786	0.900947	0.748595	0.916062	0.940691	1.00841	1.00576
YDR354W	TRP4	0.86926	0.424942	0.447389	0.624097	0.653711	0.602804	0.786206	0.792785	0.956715	0.854695
YDR356W	SPC110	1.12898	1.05769	0.89977	0.962738	0.972122	0.956945	1.02393	0.604021	0.80754	0.712956
YDR357C	YDR357C	0.720291	0.664481	0.691096	0.733592	0.841006	0.847983	0.921944	0.944924	0.986962	0.963341
YDR358W	GGA1	0.720291	0.664481	0.691096	0.733592	0.841006	0.847983	0.921944	0.846693	1.02743	0.981985
YDR359C	VID21	0.778424	0.789766	0.761839	0.727674	0.848556	0.746532	0.788596	0.70089	0.834148	0.819656
YDR361C	BCP1	0.671435	0.64017	0.756194	0.780743	0.911409	0.753312	0.851035	0.901455	1.04122	0.82788
YDR362C	TFC6	0.993346	0.971099	0.83161	0.959166	1.11985	1.00979	0.990943	0.557679	0.679928	0.801016
YDR363W	ESC2	0.993346	0.971099	0.83161	0.959166	1.11985	1.00979	0.990943	0.770854	0.930014	0.880694
YDR363W-A	SEM1	0.566319	0.467968	0.476296	0.597767	0.693559	0.606449	0.597653	0.936646	1.13552	1.14983
YDR364C	CDC40	0.823913	0.747943	0.824525	0.919407	0.981424	0.998153	0.944959	0.786532	0.863867	0.911205
YDR365C	ESF1	0.899349	0.90435	0.864336	0.887176	1.05453	0.953295	1.08518	0.587481	0.727011	0.777458
YDR367W	YDR367W	0.694197	0.652489	0.689242	0.852116	0.802276	0.795135	0.805738	0.75406	0.908323	1.00687
YDR368W	YPR1	0.939631	0.907954	0.917761	0.939065	1.06336	0.995875	0.992084	0.874937	1.02056	0.952296
YDR369C	XRS2	0.733603	0.815107	0.876839	0.868692	1.06387	0.877733	0.925269	0.482644	0.570687	0.531848
YDR370C	YDR370C	1.00217	0.993768	0.905228	0.966542	1.00447	0.976824	0.991774	0.826235	0.99874	1.00019
YDR371W	CTS2	1.00217	0.993768	0.905228	0.966542	1.00447	0.976824	0.991774	0.538015	0.782002	0.768653
YDR372C	VPS74	0.853551	0.769884	0.703798	0.871416	0.961445	0.941723	0.936457	0.881601	1.15783	1.23745
YDR373W	FRQ1	0.853551	0.769884	0.703798	0.871416	0.961445	0.941723	0.936457	0.885569	0.852588	1.01908
YDR374C	YDR374C	0.706405	0.731133	0.76928	0.813818	0.901291	0.846837	0.917934	0.600368	0.828734	0.67469
YDR374W-A	YDR374W-A	0.706405	0.731133	0.76928	0.813818	0.901291	0.846837	0.917934	0.680825	0.794521	0.775143
YDR375C	BCS1	1.01667	0.937523	0.827012	0.92415	0.935034	1.04171	0.91643	0.932029	0.852115	0.989282
YDR376W	ARH1	1.01667	0.937523	0.827012	0.92415	0.935034	1.04171	0.91643	0.84804	0.907512	0.736173
YDR377W	ATP17	0.756117	0.657076	0.66004	0.738566	0.856925	0.751089	0.817218	0.622433	0.842055	0.951855
YDR378C	LSM6	1.0842	1.07998	0.849952	0.899992	0.907071	0.888802	0.982022	0.715615	0.88726	0.962898
YDR379C-A	YDR379C-A	0.969624	0.586216	0.672007	0.781595	0.981004	0.956104	0.986716	0.0339687	0.144429	0.164953
YDR379W	RGA2	0.978202	1.02474	0.93111	0.942182	0.915768	0.991841	1.05351	0.585223	0.754354	0.723075
YDR380W	ARO10	0.878147	0.352115	0.510961	0.762582	0.667685	0.910942	0.741961	0.362359	0.614484	0.634778
YDR381W	YRA1	0.558456	0.4646	0.63586	0.655977	0.81833	0.676327	0.704515	0.939776	1.01529	1.18906
YDR382W	RPP2B	0.464263	0.430283	0.423001	0.480215	0.597766	0.519331	0.578134	0.691656	0.889008	1.01768
YDR383C	NKP1	0.97926	0.920974	0.870908	0.913873	1.12829	1.03363	1.07119	0.717511	1.00623	0.878018
YDR385W	EFT2	0.434251	0.43105	0.451656	0.413235	0.53006	0.55378	0.63322	0.826678	0.895901	0.971991
YDR387C	YDR387C	1.16307	1.06717	0.868675	1.03285	0.994253	0.992177	1.04806	0.939173	1.09084	0.988911
YDR388W	RVS167	1.16307	1.06717	0.868675	1.03285	0.994253	0.992177	1.04806	0.842457	0.850821	0.824417
YDR389W	SAC7	0.773396	0.666827	0.529251	0.531101	0.676193	0.634986	0.686619	0.996087	1.15709	1.05345
YDR390C	UBA2	0.682552	0.630449	0.59271	0.605295	0.683791	0.647202	0.659325	1.10062	1.1247	1.18576
YDR391C	YDR391C	1.20847	1.13251	0.986898	0.974369	1.1371	1.14183	1.04576	0.973697	1.13034	1.18148
YDR392W	SPT3	1.20293	1.13152	0.979027	0.914422	1.15425	1.08912	1.07208	0.888031	1.04569	0.838773
YDR393W	SHE9	0.797252	0.781799	0.820418	0.804952	0.824576	0.834921	0.903428	0.504875	0.859834	0.739654
YDR394W	RPT3	0.93163	0.88719	0.864522	0.904509	0.978094	0.969506	1.01407	0.712422	0.829624	0.753841
YDR395W	SXM1	0.863201	0.827673	0.819409	0.846037	0.84299	0.851466	0.827532	0.68247	0.787579	0.721758
YDR397C	NCB2	0.90433	0.844047	0.721366	0.66704	0.820386	0.76354	0.951161	0.848921	1.09164	1.04797
YDR398W	UTP5	0.805864	0.845786	0.743906	0.73591	0.677297	0.751329	0.770724	0.781706	1.05634	1.00626
YDR399W	HPT1	0.590005	0.71503	0.687685	0.719989	0.733826	0.699928	0.74322	0.676296	0.826245	0.765049
YDR402C	DIT2	0.75497	0.801455	0.821968	0.936507	0.901479	0.908258	0.990534	0.550915	0.673202	0.814745
YDR403W	DIT1	0.75497	0.801455	0.821968	0.936507	0.901479	0.908258	0.990534	0.550915	0.673202	0.814745
YDR404C	RPB7	0.90883	0.823049	0.695887	0.753068	0.880879	0.833218	0.864135	1.10867	1.13427	1.42642
YDR405W	MRP20	0.90883	0.823049	0.695887	0.753068	0.880879	0.833218	0.864135	1.02329	1.02612	1.10981
YDR406W	PDR15	0.704511	0.662834	0.55385	0.586795	0.609071	0.704457	0.627576	0.877434	0.895937	1.00246
YDR407C	TRS120	1.08471	0.971714	0.761627	0.786854	0.964411	0.901563	0.895696	0.674376	0.957237	0.948043
YDR408C	ADE8	1.01498	0.928339	0.760623	0.823262	0.968652	0.873691	0.888995	0.881293	1.03475	0.845193
YDR409W	SIZ1	0.893142	0.756527	0.771378	0.783523	0.871113	0.834427	0.947302	1.03355	1.13672	1.31393
YDR410C	STE14	1.05391	1.03263	0.808445	0.858788	0.919098	0.965993	0.877393	0.787367	0.915563	0.839508
YDR411C	DFM1	1.12368	1.09229	1.01531	1.08459	1.05481	1.13761	1.11298	0.904648	0.909042	0.900846
YDR412W	RRP17	1.12368	1.09229	1.01531	1.08459	1.05481	1.13761	1.11298	0.904648	0.909042	0.900846
YDR414C	ERD1	0.871411	0.767658	0.781671	0.813767	0.88364	0.737163	0.929343	0.753593	0.922586	0.802603
YDR415C	YDR415C	1.05473	0.955071	1.03758	1.04996	1.26037	1.10121	1.26243	0.976475	0.961687	0.852376
YDR416W	SYF1	1.05473	0.955071	1.03758	1.04996	1.26037	1.10121	1.26243	0.976475	0.961687	0.852376
YDR418W	RPL12B	0.597394	0.484397	0.450637	0.50599	0.608249	0.57233	0.626873	0.661438	0.832511	0.780012
YDR419W	RAD30	1.16222	1.06139	1.04344	1.02993	1.18024	1.06064	1.02386	0.896542	1.08454	1.27727
YDR420W	HKR1	0.661519	0.554745	0.626593	0.676942	0.722051	0.697008	0.725036	0.800608	0.877244	0.924576
YDR421W	ARO80	0.846618	0.769173	0.741758	0.967941	0.998884	0.947273	0.95604	0.975695	1.09955	1.10398
YDR422C	SIP1	1.07465	1.03505	0.940119	0.879129	0.925707	0.933388	0.997114	1.06923	1.10676	1.10897
YDR423C	CAD1	1.16515	1.04585	0.943712	0.968918	1.12031	1.09357	1.06849	0.950902	0.957547	1.17809
YDR424C	DYN2	1.16118	1.04965	1.00477	1.04607	1.05152	1.09009	1.05219	0.973835	1.10845	1.10208
YDR425W	SNX41	1.16118	1.04965	1.00477	1.04607	1.05152	1.09009	1.05219	0.927948	0.989224	1.03751
YDR427W	RPN9	0.657485	0.673177	0.728957	0.66299	0.920017	0.755102	0.737951	0.337537	0.439276	0.438717
YDR429C	TIF35	0.855215	0.847637	0.768388	0.905666	0.940252	0.886763	0.956043	0.572363	0.803393	0.755423
YDR430C	CYM1	0.681552	0.727613	0.670793	0.666982	0.665249	0.749452	0.853315	0.440907	0.562755	0.526512
YDR432W	NPL3	0.681552	0.727613	0.670793	0.666982	0.665249	0.749452	0.853315	0.496784	0.562888	0.55219
YDR434W	GPI17	0.783212	0.807262	0.870076	0.85315	0.929947	0.96719	0.883868	0.640928	0.662451	0.625778
YDR435C	PPM1	1.28117	1.24788	0.944331	0.909269	0.921471	1.0399	0.987912	0.51764	0.556709	0.565513
YDR436W	PPZ2	1.28117	1.24788	0.944331	0.909269	0.921471	1.0399	0.987912	0.759464	0.75174	0.897155
YDR437W	GPI19	0.641173	0.615541	0.743383	0.824466	0.98317	0.940844	0.893856	0.591941	0.639222	0.656898
YDR438W	THI74	1.00682	1.01978	1.03898	0.938309	1.08432	1.09665	1.10535	0.739668	1.00491	1.01965
YDR439W	LRS4	0.778684	0.762043	0.778672	0.91932	1.03303	0.943292	0.996756	0.666176	0.717243	0.676879
YDR440W	DOT1	1.00924	0.958174	0.942561	0.979983	1.15327	1.04637	0.983642	0.98143	1.12219	1.06624
YDR441C	APT2	0.511407	0.501745	0.460426	0.519244	0.497972	0.534131	0.45106	0.753865	1.06542	0.912145
YDR443C	SSN2	0.909598	0.850854	0.869368	0.977905	1.00662	0.962846	0.995451	1.10254	1.09682	1.13606
YDR444W	YDR444W	0.909598	0.850854	0.869368	0.977905	1.00662	0.962846	0.995451	0.925247	1.19997	1.2013
YDR446W	ECM11	1.01222	0.890402	0.947214	0.92423	1.06926	1.02426	1.01685	0.861322	0.894305	1.12227
YDR447C	RPS17B	0.680728	0.586392	0.615137	0.620873	0.771801	0.741299	0.784456	1.07876	1.04452	0.939643
YDR448W	ADA2	0.704214	0.613188	0.637274	0.649396	0.796796	0.758552	0.805193	0.833868	0.923335	0.927125
YDR449C	UTP6	0.921907	0.887721	0.872807	0.94602	0.973437	0.933417	0.997948	0.576415	0.803391	0.786161
YDR450W	RPS18A	0.475231	0.439064	0.465567	0.482504	0.648988	0.559119	0.69477	0.868941	0.881336	1.01527
YDR451C	YHP1	0.528148	0.538759	0.478027	0.509919	0.575618	0.542633	0.585976	0.607833	0.967139	0.914228
YDR452W	PPN1	0.528148	0.538759	0.478027	0.509919	0.575618	0.542633	0.585976	0.715549	0.774513	0.848913
YDR453C	TSA2	1.09773	1.08816	0.921619	0.985947	1.09943	1.10322	1.08694	0.836411	0.991519	0.927959
YDR454C	GUK1	1.03198	0.974026	0.919683	0.905797	0.963748	0.964949	0.957309	0.886258	0.917057	1.0287
YDR456W	NHX1	1.24641	1.15996	1.04761	0.89351	1.0622	0.979279	1.00393	0.816401	0.887762	0.821365
YDR457W	TOM1	0.674878	0.70361	0.77542	0.874395	0.947425	0.83277	0.810707	0.626338	0.751513	0.756335
YDR458C	HEH2	0.852433	0.759073	0.729571	0.880441	0.935176	0.912706	0.902527	0.821092	0.825351	0.948002
YDR459C	PFA5	1.07641	1.02838	0.855334	0.903795	0.989093	0.89799	0.955352	0.67563	0.829694	0.954034
YDR460W	TFB3	1.07641	1.02838	0.855334	0.903795	0.989093	0.89799	0.955352	0.511804	0.631881	0.670322
YDR461C-A	YDR461C-A	1.15926	0.972549	0.829814	0.85237	1.04753	1.00921	1.04417	0.915028	0.996553	1.13024
YDR461W	MFA1	0.573351	0.294688	0.537782	0.643169	0.780036	0.776299	0.871506	0.150831	0.305297	0.373637
YDR462W	MRPL28	1.15926	0.972549	0.829814	0.85237	1.04753	1.00921	1.04417	0.935871	1.24525	1.24793
YDR463W	STP1	0.920103	0.833305	0.744241	0.80217	0.861174	0.862782	0.845254	0.951722	1.01254	0.974485
YDR464W	SPP41	0.40573	0.404203	0.499108	0.601505	0.609164	0.590741	0.616379	0.791621	0.805871	0.873677
YDR465C	RMT2	0.985048	0.990384	0.935529	0.909472	1.11992	0.992246	1.01918	0.655824	0.741936	0.874787
YDR466W	PKH3	1.02645	1.01052	0.91138	0.877459	1.016	0.943798	0.843767	0.848083	1.07414	0.928228
YDR468C	TLG1	0.898805	0.857867	0.819056	1.03047	1.10834	1.01684	1.03683	0.82978	0.880157	1.11335
YDR469W	SDC1	0.898805	0.857867	0.819056	1.03047	1.10834	1.01684	1.03683	0.901478	0.905544	1.12139
YDR470C	UGO1	0.545156	0.463683	0.527185	0.508969	0.580823	0.586711	0.664488	0.911219	1.13209	1.01849
YDR471W	RPL27B	0.545156	0.463683	0.527185	0.508969	0.580823	0.586711	0.664488	0.983065	1.10705	1.0009
YDR472W	TRS31	0.776009	0.81282	0.826199	0.945381	0.943872	0.863889	1.00417	0.585223	0.754354	0.723075
YDR473C	PRP3	1.09944	0.962276	0.965136	1.02758	0.948506	0.971155	1.01255	0.853244	1.07755	1.06605
YDR475C	JIP4	1.00553	0.860872	0.61604	0.65637	0.771872	0.807498	0.871688	0.874425	0.928701	1.02217
YDR476C	YDR476C	1.39758	1.26377	0.789173	0.851446	1.01783	0.837455	1.04477	0.995093	1.05899	1.28717
YDR477W	SNF1	1.17092	0.961876	0.872814	0.836792	1.05441	0.97508	0.911335	0.844661	1.0947	0.967087
YDR478W	SNM1	0.811816	0.78406	0.781555	0.813591	0.917383	0.849006	0.881366	0.972958	0.895677	1.05998
YDR479C	PEX29	1.14865	1.04887	0.97781	1.02825	1.10408	1.21347	1.10763	0.89024	1.03263	1.11105
YDR480W	DIG2	1.01592	0.994536	0.938821	1.00377	1.09923	1.13855	1.07028	0.873061	0.982596	1.02663
YDR481C	PHO8	1.29707	1.01828	0.752338	0.754977	0.74307	0.836969	0.69943	0.94903	1.03911	1.011
YDR482C	CWC21	0.966938	0.894544	0.77913	0.825939	0.841269	0.794693	0.876521	0.870713	0.93153	1.04042
YDR483W	KRE2	0.966938	0.894544	0.77913	0.825939	0.841269	0.794693	0.876521	0.988121	1.14101	1.13966
YDR484W	VPS52	0.631602	0.604993	0.66221	0.806007	0.939988	0.882175	0.776572	0.792437	1.03463	1.02937
YDR485C	VPS72	0.883788	0.804786	0.820077	0.944291	1.03792	1.00509	1.01669	0.932123	1.16088	1.17308
YDR486C	VPS60	0.80365	0.805898	0.882596	0.838882	0.976514	0.842551	0.93523	0.695172	0.766658	0.768121
YDR487C	RIB3	0.669613	0.648182	0.461919	0.423452	0.545852	0.45631	0.549532	0.878785	1.04775	1.04579
YDR488C	PAC11	1.18315	1.14114	0.921649	0.986081	1.0685	0.963331	1.12404	0.777193	0.819248	0.866327
YDR489W	SLD5	1.18315	1.14114	0.921649	0.986081	1.0685	0.963331	1.12404	0.928439	1.02794	0.998463
YDR490C	PKH1	0.753542	0.804359	0.611312	0.624665	0.76315	0.629851	0.64549	0.831122	1.02322	0.785591
YDR492W	IZH1	0.753542	0.804359	0.611312	0.624665	0.76315	0.629851	0.64549	0.630338	0.700422	0.702456
YDR493W	FMP36	0.906823	0.811908	0.92372	1.0079	1.1531	0.966342	1.0622	0.994304	1.04862	1.00619
YDR494W	RSM28	1.04887	1.0093	0.864028	0.902696	0.965837	0.995448	1.03103	0.558692	0.603412	0.646266
YDR495C	VPS3	0.669809	0.662325	0.81289	0.876213	0.848643	0.778463	0.881617	0.950677	0.938673	0.829664
YDR496C	PUF6	0.669786	0.663787	0.770071	0.843314	0.907142	0.943404	0.865555	0.733552	0.747112	0.950305
YDR497C	ITR1	0.774299	0.914062	0.757496	0.815347	0.956489	0.852144	1.00327	0.301726	0.367583	0.417261
YDR498C	SEC20	1.03465	0.992018	1.00855	1.05506	1.09952	1.10505	1.108	0.851118	1.05447	1.01784
YDR499W	LCD1	0.969237	0.835128	0.884786	0.89903	1.08607	0.900552	1.08102	0.735661	0.937451	1.06862
YDR500C	RPL37B	0.460771	0.436078	0.470139	0.517877	0.656618	0.580799	0.63879	0.815496	0.988378	0.998438
YDR501W	PLM2	0.460771	0.436078	0.470139	0.517877	0.656618	0.580799	0.63879	0.919549	0.899071	0.936859
YDR502C	SAM2	0.607038	0.615459	0.675367	0.719293	0.780721	0.689713	0.799464	0.717312	0.829003	1.18765
YDR503C	LPP1	0.850461	0.752164	0.930698	0.943669	1.03083	0.94277	0.963724	1.16224	1.19699	1.24747
YDR505C	PSP1	0.880864	0.747159	0.615268	0.629672	0.844205	0.68295	0.837102	0.963594	1.05544	0.876835
YDR506C	YDR506C	0.608328	0.553333	0.571791	0.511645	0.605689	0.585274	0.638052	0.868616	1.08296	0.868144
YDR507C	GIN4	0.66941	0.648057	0.657901	0.789945	0.839916	0.825389	0.88809	0.924616	1.08237	0.992335
YDR508C	GNP1	0.374328	0.407829	0.381249	0.415523	0.471887	0.499493	0.495108	0.737968	0.833132	0.730017
YDR510W	SMT3	0.405857	0.438108	0.41563	0.455968	0.513955	0.539507	0.526758	0.55171	0.981043	0.899889
YDR511W	ACN9	1.0371	0.978803	0.847134	0.939669	1.13187	0.969899	1.12535	0.914198	0.896381	0.919785
YDR512C	EMI1	1.00471	0.813235	0.755404	0.855585	1.05774	0.977175	0.93977	1.051	1.06581	1.43942
YDR513W	GRX2	1.00471	0.813235	0.755404	0.855585	1.05774	0.977175	0.93977	0.809473	1.00174	1.23275
YDR514C	YDR514C	0.862205	0.857852	0.883501	0.854621	1.00347	0.95531	1.00776	0.566409	0.748166	0.770305
YDR515W	SLF1	0.862205	0.857852	0.883501	0.854621	1.00347	0.95531	1.00776	0.878363	0.995427	0.999326
YDR516C	EMI2	1.26971	1.1751	1.06484	1.02993	1.28823	1.10183	1.1227	0.914657	1.17308	1.00367
YDR517W	GRH1	1.11056	0.928917	0.706886	0.783742	0.819327	0.876391	0.90067	1.03042	0.996342	0.954927
YDR518W	EUG1	0.827301	0.835486	0.717187	0.801207	0.876663	0.796807	0.797663	0.739331	0.889098	0.928598
YDR519W	FPR2	1.01427	0.869882	0.863737	1.00272	0.972851	0.93967	1.0163	0.857548	0.999412	1.15986
YDR520C	YDR520C	0.83844	0.797022	0.796842	0.841497	0.912566	0.884894	0.900326	0.905357	1.09788	1.04016
YDR522C	SPS2	0.523521	0.540788	0.658866	0.746063	0.743982	0.657525	0.74081	0.522167	0.649285	0.644171
YDR523C	SPS1	0.616861	0.598027	0.638759	0.719505	0.690307	0.59265	0.667913	0.822455	0.85857	0.707548
YDR524C	AGE1	0.450617	0.420542	0.41058	0.444991	0.441696	0.425845	0.42679	0.934308	1.10454	1.02731
YDR524C-B	YDR524C-B	0.30592	0.218071	0.222217	0.249102	0.186793	0.274698	0.210592	0.659919	0.795848	0.868664
YDR524W-C	YDR524W-C	0.450617	0.420542	0.41058	0.444991	0.441696	0.425845	0.42679	0.843806	1.01952	0.996104
YDR525W-A	SNA2	0.256701	0.188853	0.177953	0.232906	0.314678	0.241549	0.324887	0.755527	0.827703	0.905298
YDR527W	RBA50	0.745352	0.552037	0.597576	0.596707	0.94167	0.669464	0.858719	0.617863	0.907538	0.800839
YDR528W	HLR1	0.668522	0.673575	0.592602	0.632342	0.769295	0.661359	0.741094	0.503536	0.687481	0.719754
YDR529C	QCR7	1.06424	0.955251	0.78106	0.812722	0.89517	0.833711	0.917256	1.067	1.11816	1.15722
YDR530C	APA2	1.1526	0.952297	0.904288	0.908453	1.1753	0.96074	1.12277	0.934803	1.14915	1.36687
YDR531W	YDR531W	0.856435	0.599766	0.653384	0.669339	0.920261	0.722761	0.856934	0.71845	0.891858	0.861712
YDR532C	YDR532C	1.06012	1.05671	1.1371	1.10864	1.16218	1.21671	1.14311	0.581116	0.708794	0.863553
YDR533C	HSP31	0.731552	0.607608	0.638302	0.66722	0.840276	0.754647	0.841596	0.799067	0.913782	1.03217
YDR534C	FIT1	0.913233	0.890811	0.916415	0.87401	0.922741	0.930466	0.953003	0.891456	1.08907	1.07827
YDR536W	STL1	0.945237	0.925991	0.682621	0.685728	0.686968	0.736525	0.717864	0.759066	0.770455	0.790844
YDR538W	PAD1	0.993116	0.953718	0.95832	0.962059	0.972139	0.911225	1.00519	0.977033	0.876826	1.0158
YDR539W	YDR539W	0.817438	0.789903	0.785866	0.946679	1.01179	0.878849	0.930443	0.740936	0.858642	0.824996
YDR541C	YDR541C	0.839244	0.738661	0.765086	0.809499	0.910408	0.845039	0.821528	0.843687	1.04967	1.06677
YEL001C	YEL001C	0.923211	0.79327	0.856437	0.939511	1.06109	0.956751	0.98934	0.941971	1.05777	1.27183
YEL002C	WBP1	0.754343	0.672005	0.787946	0.870347	1.02399	0.843368	0.947509	1.07205	1.13485	1.21501
YEL003W	GIM4	0.871074	0.796739	0.855954	0.853217	1.09436	1.02551	0.993913	0.695075	0.802379	0.959956
YEL004W	YEA4	1.11391	1.06438	1.08995	1.04058	1.27921	1.04974	1.30876	0.849835	0.952931	1.01706
YEL005C	VAB2	1.11391	1.06438	1.08995	1.04058	1.27921	1.04974	1.30876	0.876118	0.930738	0.935193
YEL006W	YEA6	0.651379	0.579578	0.635532	0.710082	0.822127	0.688346	0.787436	0.793847	0.860532	1.02064
YEL007W	YEL007W	0.315597	0.291925	0.296219	0.546251	0.444375	0.554369	0.423719	1.00158	0.985875	1.02155
YEL009C	GCN4	0.401819	0.369034	0.389977	0.439075	0.532353	1.44414	0.548826	1.1762	1.23807	1.20031
YEL011W	GLC3	1.23752	1.0647	1.03523	0.980542	1.1498	1.19755	1.08962	1.0699	1.21445	1.1067
YEL012W	UBC8	0.823326	0.727608	0.754336	0.783956	0.947995	0.869916	1.00804	0.789358	0.735964	0.933703
YEL013W	VAC8	0.738882	0.703519	0.738533	0.808631	0.877924	0.800029	0.905077	0.88866	0.990046	1.03797
YEL015W	EDC3	0.944091	0.878734	0.825766	0.825612	1.02268	0.925958	0.981197	1.15456	1.09389	1.03209
YEL016C	NPP2	0.944091	0.878734	0.825766	0.825612	1.02268	0.925958	0.981197	0.902281	0.921607	0.870133
YEL017C-A	PMP2	0.525801	0.517544	0.576004	0.560412	0.875386	0.668644	0.669715	0.803125	0.925183	0.929831
YEL017W	GTT3	0.465935	0.437093	0.330714	0.355357	0.414022	0.378715	0.423445	0.748457	0.92606	0.839135
YEL018W	EAF5	1.05592	0.985	1.10148	1.14812	1.21846	1.04726	1.2154	0.818322	0.973911	0.935228
YEL019C	MMS21	1.05592	0.985	1.10148	1.14812	1.21846	1.04726	1.2154	0.927629	0.963592	0.980312
YEL020C	YEL020C	0.856333	0.915635	0.839603	0.848595	0.834907	0.912286	0.938656	0.303345	0.496674	0.619616
YEL020W-A	TIM9	0.406747	0.383344	0.381613	0.314337	0.42142	1.22618	0.416679	0.600956	0.721271	0.681103
YEL021W	URA3	0.245391	0.233768	0.222001	0.219095	0.207604	1.2906	0.223091	0.857168	0.917743	1.01669
YEL022W	GEA2	0.797277	0.751379	0.878062	0.895696	1.06602	0.911544	0.965067	0.904146	0.92357	1.02655
YEL023C	YEL023C	0.797277	0.751379	0.878062	0.895696	1.06602	0.911544	0.965067	0.346958	0.497596	0.514137
YEL024W	RIP1	0.951482	0.844649	0.849754	0.910767	0.988301	0.871915	0.916226	0.903875	1.1801	1.03334
YEL025C	YEL025C	1.11191	0.961117	0.872414	0.993481	1.16755	1.01878	0.997789	1.15005	1.1436	1.01364
YEL026W	SNU13	0.493632	0.493661	0.629141	0.677717	0.906424	0.686693	0.723416	0.708087	0.919443	0.782711
YEL027W	CUP5	0.432202	0.383637	0.428326	0.49704	0.610777	0.45987	0.577903	1.05615	1.1946	1.2191
YEL029C	BUD16	1.15582	1.02866	1.09662	1.14333	1.08339	1.16321	1.20681	0.662338	0.66794	0.706354
YEL030W	ECM10	0.773313	0.718921	0.879747	0.904473	0.948004	0.893094	0.951452	0.718078	0.808061	0.939291
YEL031W	SPF1	1.01752	0.966067	0.888699	0.900348	1.00007	1.00511	0.97278	1.05623	1.0876	1.0135
YEL032W	MCM3	0.404545	0.37052	0.394817	0.44348	0.486978	0.432834	0.490808	0.930043	1.08563	1.10607
YEL034W	HYP2	0.385251	0.41668	0.410134	0.571298	0.426949	0.682892	0.551233	0.42523	0.552785	0.646172
YEL036C	ANP1	0.68483	0.680075	0.646595	0.805653	0.695629	0.863868	0.774864	0.776615	0.732019	0.765736
YEL037C	RAD23	0.808653	0.790266	0.82574	0.790143	0.911823	0.79961	0.796069	0.805219	0.844629	0.946495
YEL038W	UTR4	0.877653	0.88101	0.807814	0.779705	0.87061	0.946562	0.827518	0.854209	0.864565	0.782571
YEL039C	CYC7	0.877653	0.88101	0.807814	0.779705	0.87061	0.946562	0.827518	0.678742	0.774378	1.04463
YEL040W	UTR2	0.637611	0.65584	0.529277	0.763774	0.655809	0.786394	0.57487	0.480013	0.607172	0.539997
YEL041W	YEF1	0.883546	1.03482	0.99124	1.09206	1.02678	0.952945	1.04483	0.338222	0.492383	0.334165
YEL042W	GDA1	0.678135	0.668907	0.678441	0.767466	0.83195	0.775217	0.828799	0.743574	0.874528	0.879236
YEL043W	YEL043W	1.09429	0.999795	0.760674	0.843629	0.913222	0.821228	0.923985	0.85068	1.11072	1.09548
YEL044W	IES6	0.46908	0.536123	0.297507	0.589478	0.630136	0.657428	0.65724	0.718285	0.850417	0.935589
YEL046C	GLY1	0.268127	0.28357	0.226217	0.391423	0.340026	0.427506	0.417002	0.621367	0.735267	0.667314
YEL048C	YEL048C	0.826248	0.774151	0.746233	0.767385	0.871226	0.830388	0.814521	0.946466	0.964546	1.09381
YEL049W	PAU2	1.1631	1.14737	1.19399	1.16019	1.13563	1.17443	1.16843	0.781691	0.960052	0.903777
YEL050C	RML2	0.848782	0.843668	0.793753	0.817848	0.992397	0.835642	0.898684	0.795466	1.00166	0.895882
YEL051W	VMA8	1.06007	0.983089	0.961449	0.960175	0.943626	0.95622	0.946862	0.706559	0.881647	0.832408
YEL052W	AFG1	1.10839	0.977323	0.993391	0.968385	0.975356	1.02583	1.07047	0.667535	0.84249	0.731585
YEL053C	MAK10	1.0989	1.08162	1.05524	1.06862	0.968495	1.07122	1.03274	0.733237	1.05234	0.941551
YEL054C	RPL12A	0.592778	0.44222	0.401058	0.496257	0.48479	0.509922	0.546624	0.694437	0.984999	0.949965
YEL055C	POL5	0.820859	0.748202	0.816967	0.844911	1.10619	0.884106	1.03148	1.08362	1.13683	1.16851
YEL056W	HAT2	1.05504	1.06117	1.0325	1.05219	1.33421	1.16544	1.19817	0.50568	0.947324	0.954036
YEL057C	YEL057C	0.829042	0.768928	0.855726	0.931193	1.04555	0.902765	1.00817	0.807971	0.976604	0.894806
YEL058W	PCM1	1.27944	1.27266	1.10059	1.03731	1.04693	1.05175	1.09158	0.674092	0.892577	0.878417
YEL059C-A	SOM1	1.52887	1.48706	1.09261	1.01231	1.02986	1.10488	1.12895	0.930071	1.05664	0.99989
YEL060C	PRB1	0.699486	0.686533	0.614794	0.572735	0.749852	0.648145	0.710042	0.869862	0.863983	1.08117
YEL061C	CIN8	0.595609	0.565066	0.658927	0.769246	0.922552	0.807147	0.951142	1.07885	1.19642	1.27237
YEL062W	NPR2	1.18167	1.1327	1.07717	1.28413	1.20519	1.30302	1.4072	0.899032	1.01274	0.947757
YEL063C	CAN1	0.585706	0.470317	0.462628	0.574788	0.664288	0.643778	0.667494	0.999583	0.939541	0.939102
YEL064C	AVT2	0.673274	0.651168	0.743673	0.716272	0.869016	0.794124	0.821897	0.74654	0.833608	0.889041
YEL065W	SIT1	0.952654	1.0723	0.889726	0.944037	0.950429	0.906367	0.904978	0.348624	0.513983	0.509589
YEL066W	HPA3	1.35388	1.13904	0.996261	0.912608	0.899574	0.96588	1.03393	0.994375	1.07098	1.12739
YEL067C	YEL067C	1.35388	1.13904	0.996261	0.912608	0.899574	0.96588	1.03393	0.71309	0.654572	0.997234
YEL069C	HXT13	0.8175	0.923499	0.883656	0.796814	0.744858	0.846607	0.75997	0.459164	0.507597	0.654192
YEL070W	DSF1	0.614436	0.667481	0.750365	0.81271	0.805983	0.72773	0.736821	0.442829	0.557993	0.540406
YEL071W	DLD3	0.756484	0.559725	0.259065	0.509912	0.6192	0.491576	0.687605	0.831181	0.983201	0.948546
YEL072W	RMD6	0.878039	0.92567	0.783002	0.839004	0.937528	0.798247	0.912366	0.503801	0.628245	0.635903
YER001W	MNN1	0.430211	0.369979	0.328698	0.625338	0.470995	0.605785	0.463089	1.18993	1.06227	0.938537
YER002W	NOP16	0.758294	0.739986	0.843472	0.900565	1.02454	0.86563	0.935238	0.624537	0.838259	0.925569
YER003C	PMI40	0.975502	0.982088	0.769308	0.80093	0.884606	0.868116	0.870599	0.702751	0.803075	0.668962
YER004W	FMP52	1.42616	1.48426	1.08877	1.0322	1.07924	1.06322	1.09855	0.486564	0.709914	0.689419
YER005W	YND1	1.02949	0.9306	0.809873	0.853298	0.994227	0.920389	0.898234	0.973835	1.10845	1.10208
YER006W	NUG1	0.976109	0.850834	0.913373	0.837354	0.937297	0.904261	0.9039	1.03393	1.144	0.993435
YER007C-A	TMA20	0.932545	0.944633	1.0352	1.04735	1.18271	1.03053	1.11851	0.628569	0.851624	0.858206
YER008C	SEC3	1.03361	1.00497	1.01773	1.00149	1.0529	1.00849	0.996761	0.82105	1.00044	1.07263
YER009W	NTF2	1.03361	1.00497	1.01773	1.00149	1.0529	1.00849	0.996761	0.933357	0.943371	0.976805
YER010C	YER010C	1.20523	1.08662	1.02087	1.00008	1.08531	1.05539	1.03032	0.912821	1.03586	1.3235
YER011W	TIR1	0.966429	0.89407	0.773388	0.940388	0.844156	0.965039	0.843717	0.739832	0.817774	0.728202
YER012W	PRE1	1.01105	0.914348	0.919806	0.971488	1.15263	1.05435	1.11725	0.782204	1.04585	1.07321
YER013W	PRP22	0.765705	0.780891	0.856521	0.833575	0.963763	0.91198	0.944154	0.670069	0.701665	0.72095
YER014W	HEM14	0.833971	0.857312	0.978031	1.03238	1.0087	0.967439	0.962264	0.487368	0.685736	0.611822
YER015W	FAA2	1.05717	0.968979	0.883441	0.965212	0.852181	0.957912	0.969851	0.719619	0.903038	0.878214
YER016W	BIM1	1.25937	1.01842	1.0267	1.01001	1.12033	1.13821	0.997336	0.913201	1.1202	1.09328
YER017C	AFG3	0.933424	0.882444	0.657153	0.588337	0.634032	0.589148	0.664887	0.871729	1.00662	0.967392
YER018C	SPC25	1.14023	1.07573	0.861432	0.916688	0.989198	0.923686	1.04358	0.977419	0.989192	1.06012
YER019C-A	SBH2	0.917252	0.737855	0.603874	0.683868	0.888408	0.857271	0.891106	0.713506	0.862554	1.02325
YER019W	ISC1	1.14023	1.07573	0.861432	0.916688	0.989198	0.923686	1.04358	0.845754	0.620378	0.463509
YER020W	GPA2	1.03242	0.788815	0.650646	0.644525	0.859556	0.942958	0.836512	0.946243	1.18578	1.06689
YER021W	RPN3	0.634046	0.635143	0.605132	0.671265	0.764201	0.684926	0.715066	0.969076	0.957748	0.948364
YER022W	SRB4	0.742877	0.728067	0.770122	0.836963	0.975154	0.815225	0.844655	1.0748	1.16658	1.02354
YER023W	PRO3	1.05155	1.06384	0.926121	0.991902	0.934554	1.00204	0.929775	0.77117	0.964316	0.935093
YER024W	YAT2	0.861811	0.695756	0.683512	0.699759	0.795418	0.693196	0.798912	1.15053	1.34546	1.23843
YER025W	GCD11	0.991156	0.895445	0.859236	0.860801	0.907586	0.846449	0.952784	0.867595	0.969012	1.00085
YER026C	CHO1	0.62643	0.632109	0.742624	0.726718	0.902547	0.843436	0.895066	0.788886	0.822737	0.696918
YER027C	GAL83	1.11529	1.0932	0.901457	0.977618	1.06359	1.02163	1.00957	0.727617	0.862022	0.770189
YER028C	MIG3	0.460844	0.306415	0.42322	0.646141	0.612335	0.761698	0.570779	0.668668	0.841644	1.00206
YER029C	SMB1	0.868508	0.871693	0.908203	0.940619	1.19481	0.991633	1.12618	0.771585	0.911818	0.923321
YER030W	CHZ1	0.868508	0.871693	0.908203	0.940619	1.19481	0.991633	1.12618	0.847818	0.934521	0.937353
YER031C	YPT31	1.10242	1.12879	0.908586	0.90848	0.914395	1.00857	0.986475	0.554181	0.674459	0.766811
YER032W	FIR1	1.10242	1.12879	0.908586	0.90848	0.914395	1.00857	0.986475	0.942202	0.907822	0.889921
YER033C	ZRG8	0.980164	0.872157	0.771146	0.670343	0.810863	0.856011	0.823219	1.23866	1.3562	1.35147
YER034W	YER034W	0.636742	0.617758	0.57721	0.618248	0.700431	0.67621	0.642435	0.834396	0.947894	0.991532
YER035W	EDC2	0.739655	0.629792	0.473468	0.506781	0.589275	0.601351	0.697702	0.824803	0.886249	0.836121
YER036C	ARB1	0.472706	0.444991	0.472596	0.485455	0.669823	0.585696	0.608574	0.88247	0.885338	1.24599
YER037W	PHM8	0.472706	0.444991	0.472596	0.485455	0.669823	0.585696	0.608574	0.803316	0.873785	0.809355
YER038C	KRE29	0.925767	0.936724	0.921357	0.979334	1.13105	0.976899	1.00222	0.716957	0.964301	0.916475
YER039C	HVG1	0.975714	1.07213	0.768495	0.819908	0.873751	0.888454	1.0136	0.546292	0.788977	0.844712
YER039C-A	YER039C-A	0.975714	1.07213	0.768495	0.819908	0.873751	0.888454	1.0136	0.546292	0.788977	0.844712
YER040W	GLN3	0.975714	1.07213	0.768495	0.819908	0.873751	0.888454	1.0136	0.506433	0.653077	0.696489
YER041W	YEN1	0.705759	0.63291	0.802532	0.755568	1.03134	0.912813	0.875136	1.00204	1.11835	1.09611
YER042W	MXR1	0.970928	0.995298	0.829512	0.845272	0.953847	0.883797	0.906595	0.550438	0.760801	0.753127
YER043C	SAH1	0.647009	0.726329	0.685167	0.792457	0.879032	0.787236	0.866147	0.771036	1.13278	1.03202
YER044C	ERG28	0.703286	0.665692	0.585527	0.737221	0.788082	0.689987	0.787157	0.811236	0.873071	0.969809
YER045C	ACA1	0.666925	0.532752	0.556687	0.770079	0.7085	0.739203	0.691038	1.07406	1.47195	1.44553
YER046W	SPO73	0.986058	0.890147	0.836445	0.975443	1.06461	0.996087	1.00902	0.991555	1.02618	1.20475
YER047C	SAP1	0.624757	0.617303	0.703889	0.74666	0.819902	0.73015	0.749574	0.812809	0.942983	0.995479
YER048C	CAJ1	0.950256	0.923574	0.811603	0.788493	0.914504	0.973728	0.912611	0.792607	0.901714	1.22783
YER048W-A	ISD11	0.707698	0.663287	0.801766	0.829068	0.986909	0.832557	0.918578	0.801847	0.90884	0.977949
YER049W	TPA1	0.707686	0.638085	0.769195	0.780296	1.02925	0.858168	0.989446	0.779228	0.944907	1.04293
YER050C	RSM18	1.1236	1.03103	1.05268	1.03736	1.16254	1.10151	1.15846	0.809151	0.990104	1.05492
YER051W	JHD1	1.1236	1.03103	1.05268	1.03736	1.16254	1.10151	1.15846	0.811638	0.90707	1.13388
YER052C	HOM3	0.70626	0.298351	0.377832	0.506249	0.640493	0.591363	0.664328	0.740721	1.11664	0.913207
YER053C	PIC2	0.914523	0.570618	0.65552	0.737081	0.972427	0.843113	1.00564	0.687886	0.861631	0.905527
YER054C	GIP2	0.870814	0.837282	0.816257	0.826652	0.911213	0.917935	0.905611	0.788564	0.823918	0.725945
YER055C	HIS1	0.564525	0.281287	0.373296	0.439267	0.402481	0.449196	0.474956	0.30883	0.559733	0.718133
YER056C	FCY2	0.313777	0.2798	0.328532	0.367788	0.47591	0.428775	0.468419	0.746584	0.884036	0.754892
YER056C-A	RPL34A	0.54536	0.476974	0.481638	0.516714	0.658384	0.57119	0.586605	0.738346	0.736566	0.875944
YER057C	HMF1	1.23599	1.03325	0.961542	0.984305	1.1734	0.995288	1.1371	0.69838	0.708922	0.710862
YER058W	PET117	1.30688	1.10922	0.954406	0.950538	1.17019	1.10647	1.15234	1.09537	1.18107	1.14078
YER059W	PCL6	0.735841	0.680099	0.720556	0.801115	0.782126	0.785848	0.774017	0.885579	0.895135	0.899428
YER060W	FCY21	0.767509	0.701972	0.75656	0.755493	0.927131	0.835505	0.832695	0.817773	0.973543	0.909926
YER060W-A	FCY22	0.904429	0.913461	1.06336	1.04149	1.06248	0.984555	1.10019	0.643558	0.806854	0.881319
YER061C	CEM1	1.00017	0.869099	0.946369	0.993847	1.0148	0.974534	0.950556	0.966889	1.24195	1.13073
YER062C	HOR2	0.582355	0.495739	0.514006	0.516559	0.690516	0.588029	0.659003	0.98803	1.12061	1.16489
YER063W	THO1	0.918788	0.793679	0.787196	0.723365	1.07154	0.862899	1.03144	1.05923	1.08445	1.07457
YER065C	ICL1	0.757896	0.667605	0.658855	0.617542	0.810203	0.634566	0.859726	0.71514	0.796969	0.823464
YER066W	YER066W	1.22202	1.07822	0.980726	0.986058	1.0801	1.05952	1.10735	0.897881	1.02544	1.11408
YER067W	YER067W	1.02909	0.974128	0.871127	0.863061	0.908677	0.925276	0.898359	0.909193	0.888457	0.914714
YER068W	MOT2	0.760469	0.635696	0.697015	0.75493	0.880527	0.751159	0.837683	0.733838	0.798868	0.857808
YER069W	ARG5,6	0.692556	0.301915	0.293006	0.293385	0.44563	0.327139	0.410289	0.417007	0.589003	0.486877
YER070W	RNR1	0.571656	0.483018	0.51494	0.544983	0.608531	0.583411	0.584253	0.706482	0.951618	0.938092
YER071C	YER071C	1.08809	0.938702	0.947158	0.992673	1.29833	1.20946	1.28773	0.737521	0.693321	0.988069
YER072W	VTC1	0.974485	0.908629	0.738598	0.755333	1.02516	0.869424	0.943401	0.802211	0.965385	0.848959
YER074W	RPS24A	0.392439	0.323573	0.402752	0.401381	0.576811	0.484861	0.537726	1.12717	1.12229	1.22204
YER074W-A	YOS1	0.781391	0.729377	0.791686	0.882536	0.995897	0.9365	1.0384	0.863615	0.922453	1.04472
YER075C	PTP3	0.827623	0.69991	0.596522	0.593609	0.626075	0.726545	0.771233	0.745485	0.938609	0.948276
YER077C	YER077C	0.890379	0.83971	0.930721	0.947169	0.968827	0.936974	1.00933	0.919425	1.10512	1.22928
YER078C	YER078C	0.796894	0.624268	0.697386	0.8564	0.876713	0.785515	0.867457	1.0685	1.12008	0.851182
YER079W	YER079W	0.796894	0.624268	0.697386	0.8564	0.876713	0.785515	0.867457	1.0911	1.14539	1.21285
YER080W	FMP29	0.966428	0.924032	0.785446	0.846801	0.949606	0.895565	0.943748	0.828655	1.04203	0.868684
YER081W	SER3	0.4955	0.346292	0.49686	0.598552	0.670917	0.716406	0.563317	0.824926	0.932019	1.05202
YER082C	UTP7	0.718171	0.701664	0.783982	0.803768	0.98162	0.924673	0.887768	0.78396	0.826542	0.795609
YER083C	GET2	1.21771	1.1548	0.908385	0.85018	0.949676	0.974113	1.02706	1.01892	1.08481	1.02729
YER085C	YER085C	0.838124	0.732139	0.836976	0.860637	1.09734	0.877545	0.84465	0.98957	1.09097	1.0864
YER086W	ILV1	0.838124	0.732139	0.836976	0.860637	1.09734	0.877545	0.84465	0.897695	1.04704	1.07379
YER087C-B	SBH1	0.740164	0.691147	0.739736	0.706915	0.943875	0.813409	0.84127	1.10999	1.00538	1.01666
YER087W	YER087W	0.834541	0.733031	0.820151	0.863164	1.01161	0.88223	0.95123	0.858768	1.19777	1.35727
YER088C	DOT6	0.527913	0.488568	0.468599	0.374014	0.464612	0.570188	0.493911	0.682826	0.853487	1.04016
YER089C	PTC2	0.771162	0.609755	0.657281	0.683735	0.796774	0.713055	0.791708	0.871904	1.11345	1.02878
YER090W	TRP2	0.771162	0.609755	0.657281	0.683735	0.796774	0.713055	0.791708	0.788369	0.896124	0.925279
YER091C	MET6	0.521645	0.419953	0.474219	0.485931	0.541734	0.422283	0.614666	0.742636	0.832485	0.646303
YER092W	IES5	0.523352	0.421409	0.476295	0.487813	0.543926	0.423333	0.616847	0.672944	0.942046	1.03318
YER093C	TSC11	1.28488	1.08308	1.00808	1.0906	1.06056	0.95027	1.1012	0.806477	0.997471	0.965239
YER093C-A	YER093C-A	0.98457	1.01801	0.963331	1.00445	1.02105	1.03478	1.01576	0.607216	0.771824	0.902321
YER094C	PUP3	1.32141	1.18735	0.7698	0.825844	0.932141	0.869109	0.889657	0.7745	0.915044	0.971768
YER095W	RAD51	1.1396	1.18139	0.882048	0.860037	1.00236	0.97706	0.991195	0.62035	0.690623	0.703129
YER096W	SHC1	0.826139	0.666732	0.919522	0.849576	0.900513	1.01813	0.85852	1.06072	1.20752	1.28727
YER098W	UBP9	0.646492	0.543497	0.605812	0.725061	0.721861	0.791239	0.738611	1.30743	1.32885	1.29513
YER099C	PRS2	1.29005	1.1546	0.988268	1.01352	1.12836	1.09393	1.1211	0.815548	1.00689	0.951478
YER100W	UBC6	1.29998	1.15874	0.947323	1.09368	1.05729	1.0356	1.12762	0.987006	1.00608	0.983658
YER101C	AST2	0.568357	0.55168	0.554676	0.562936	0.682328	0.618871	0.678833	0.824925	0.81193	0.981696
YER102W	RPS8B	0.575434	0.558001	0.558959	0.567964	0.687992	0.623966	0.684002	0.577242	0.70869	0.770671
YER104W	RTT105	0.873869	0.876607	0.802987	0.889906	0.914835	0.900835	0.990827	0.84939	0.991305	0.965472
YER105C	NUP157	0.660363	0.637842	0.780721	0.921705	0.955406	0.869858	0.836337	0.747926	0.889473	0.963161
YER106W	MAM1	0.660363	0.637842	0.780721	0.921705	0.955406	0.869858	0.836337	0.932682	0.995342	0.768014
YER107C	GLE2	0.686477	0.693831	0.775897	0.799097	0.869808	0.774764	0.820813	0.742804	0.681939	0.695532
YER109C	FLO8	1.11249	1.01803	0.895931	0.840524	0.881998	0.935157	0.885385	1.12885	1.14555	1.20247
YER110C	KAP123	0.579538	0.551059	0.570253	0.684091	0.689928	0.683856	0.653744	0.98744	0.885818	0.924177
YER111C	SWI4	0.67697	0.687765	0.609428	0.802642	0.755997	0.665974	0.712563	0.480299	0.502929	0.608307
YER112W	LSM4	0.615708	0.630815	0.700603	0.740604	0.879982	0.783516	0.862811	1.01791	1.05641	0.935316
YER113C	YER113C	0.70731	0.661684	0.733338	0.768666	0.814671	0.877536	0.805554	1.07054	1.22533	0.988557
YER114C	BOI2	0.76369	0.676187	0.725343	0.729372	0.822832	0.79668	0.850273	1.27356	1.26387	1.20016
YER115C	SPR6	0.718519	0.615646	0.769949	0.902938	1.10061	0.946257	1.04658	1.24755	1.21507	1.31087
YER116C	SLX8	0.553112	0.495526	0.557808	0.551112	0.662921	0.630263	0.67697	0.662909	1.10617	0.939043
YER117W	RPL23B	0.553112	0.495526	0.557808	0.551112	0.662921	0.630263	0.67697	0.994552	1.16834	0.990163
YER118C	SHO1	0.900771	0.864172	0.761752	0.85608	0.987424	0.97885	0.950795	0.93028	0.945234	1.0557
YER119C	AVT6	1.19388	1.01516	0.844295	0.789229	0.835195	0.927519	0.871556	1.00224	0.973712	0.984661
YER120W	SCS2	1.19388	1.01516	0.844295	0.789229	0.835195	0.927519	0.871556	1.16249	1.05723	1.19377
YER121W	YER121W	0.77671	0.705849	0.839615	0.955335	0.943155	0.885147	0.900453	0.891281	0.961123	1.02817
YER122C	GLO3	0.983599	0.856205	0.790885	0.813886	0.858311	0.868788	0.855762	1.08137	1.1667	1.11736
YER123W	YCK3	0.983599	0.856205	0.790885	0.813886	0.858311	0.868788	0.855762	1.13486	1.25743	1.33977
YER124C	DSE1	0.678427	0.592365	0.586601	0.653347	0.769212	0.730092	0.677332	0.930529	0.945478	1.13413
YER125W	RSP5	0.678427	0.592365	0.586601	0.653347	0.769212	0.730092	0.677332	0.930529	0.945478	1.13413
YER126C	NSA2	0.880652	0.941245	0.978361	0.959381	1.0509	0.924355	0.924	0.371388	0.459159	0.510608
YER127W	LCP5	0.880652	0.941245	0.978361	0.959381	1.0509	0.924355	0.924	0.459321	0.576	0.630852
YER128W	YER128W	0.954717	0.886014	0.921996	0.913042	0.859638	1.00248	0.903223	0.884859	0.99664	1.11034
YER129W	SAK1	1.12324	1.01097	1.0069	1.02905	1.0642	1.03707	1.02453	0.780924	0.847176	1.03777
YER130C	YER130C	0.890157	0.731671	0.712284	0.665905	0.824203	0.79741	0.899455	0.691922	0.809945	0.903838
YER131W	RPS26B	0.510041	0.48063	0.528737	0.5542	0.761862	0.686524	0.693866	0.830554	0.838251	1.02049
YER132C	PMD1	0.787478	0.667029	0.6111	0.703932	0.686213	0.807783	0.749297	0.946278	1.08244	1.14925
YER133W	GLC7	0.890471	0.80731	0.835062	0.860792	1.00771	0.889909	0.939841	0.919537	0.971268	1.00021
YER134C	YER134C	1.19125	1.11649	0.977742	0.98131	1.00033	1.02744	1.04971	0.729916	0.913445	1.01516
YER136W	GDI1	0.862527	0.658776	0.661897	0.681164	0.808292	0.822306	0.866132	1.48909	1.30847	1.18498
YER137C	YER137C	0.551139	0.526135	0.47746	0.485448	0.60541	0.552822	0.579859	0.79291	0.973377	1.01018
YER139C	YER139C	1.05921	1.04372	1.15027	1.20114	1.26174	1.09453	1.23134	0.534775	0.636984	0.709395
YER140W	YER140W	1.05921	1.04372	1.15027	1.20114	1.26174	1.09453	1.23134	0.795614	0.829976	1.11696
YER141W	COX15	0.804943	0.753547	0.698566	0.798514	0.905832	0.839202	0.862102	0.836968	0.914804	1.02374
YER142C	MAG1	0.978993	0.882838	0.959712	1.08342	1.08343	1.0691	1.13207	1.26491	1.20529	1.10768
YER143W	DDI1	0.978993	0.882838	0.959712	1.08342	1.08343	1.0691	1.13207	0.658547	0.764513	0.863221
YER145C	FTR1	0.730915	0.695218	0.529852	0.635354	0.537605	0.48367	0.593076	0.675709	0.700284	0.87972
YER146W	LSM5	0.807217	0.834612	0.67831	0.709676	0.779342	0.683316	0.895066	0.519856	0.702421	0.666915
YER147C	SCC4	0.872591	0.826956	0.874675	0.841911	1.16753	0.93309	0.948295	0.638179	0.974742	0.917137
YER148W	SPT15	0.872591	0.826956	0.874675	0.841911	1.16753	0.93309	0.948295	0.837606	0.798784	0.854294
YER149C	PEA2	1.2516	1.15352	1.00472	1.00679	1.09903	1.01393	1.16254	1.06771	1.0927	1.18308
YER150W	SPI1	0.713404	0.63902	0.629773	0.683525	0.8214	0.782357	0.758748	0.939583	1.02314	1.04085
YER151C	UBP3	0.966375	0.934472	0.868442	0.783118	0.915347	0.873777	0.883407	1.02181	0.94346	1.12528
YER152C	YER152C	1.07332	1.14043	0.709872	0.675243	0.807817	0.773994	0.635503	0.484693	0.629156	0.77709
YER153C	PET122	1.06253	1.06802	0.734449	0.667108	0.66661	0.767102	0.794386	0.602795	0.673205	0.784788
YER154W	OXA1	1.06253	1.06802	0.734449	0.667108	0.66661	0.767102	0.794386	0.851997	0.873101	1.07309
YER155C	BEM2	0.965018	0.774777	0.81384	0.954105	1.00204	0.98187	1.02758	0.992263	1.22479	1.19994
YER156C	YER156C	0.969182	0.828177	0.754908	0.79727	0.932872	0.911053	0.896439	0.903161	0.930829	1.00848
YER157W	COG3	1.19908	1.09652	0.926231	0.984911	0.982681	0.901422	0.955767	0.763625	0.790842	0.862279
YER158C	YER158C	0.469077	0.363055	0.376706	0.51676	0.380047	0.547751	0.422173	1.15987	1.28503	1.33993
YER161C	SPT2	0.786238	0.731733	0.723601	0.862718	0.932479	0.83124	0.912998	0.965701	0.89297	0.972343
YER162C	RAD4	0.987327	0.909502	0.903222	0.905547	0.985039	0.963681	1.03365	0.782959	0.930183	0.8026
YER163C	YER163C	1.06585	1.02172	0.855248	0.831168	0.846334	0.886229	0.91746	0.978611	0.958072	0.83749
YER164W	CHD1	0.921174	0.945681	0.984502	1.01897	1.02267	0.950577	1.04015	0.698674	0.658032	0.717385
YER165W	PAB1	0.565486	0.559284	0.58887	0.609486	0.699765	0.742716	0.71129	0.655688	0.758222	0.8236
YER166W	DNF1	0.69067	0.703773	0.75334	0.797988	0.870865	0.800307	0.836717	0.592073	0.693546	0.778447
YER167W	BCK2	0.589356	0.562281	0.590652	0.614986	0.653718	0.66104	0.637514	0.867443	0.971324	1.08547
YER168C	CCA1	0.622484	0.623498	0.569999	0.550832	0.688507	0.666344	0.705528	0.747953	0.737917	0.913903
YER169W	RPH1	0.622484	0.623498	0.569999	0.550832	0.688507	0.666344	0.705528	0.855128	0.954272	1.10008
YER170W	ADK2	0.942951	0.886183	0.891048	0.962674	0.96274	0.929445	0.877236	0.967026	1.07947	0.903126
YER171W	RAD3	0.64932	0.66197	0.697621	0.766282	0.879234	0.731944	0.799325	0.622282	0.766106	0.662517
YER172C	BRR2	0.937992	0.972791	0.930681	1.06004	1.11484	1.04665	1.0521	0.520988	0.654779	0.719523
YER173W	RAD24	0.937992	0.972791	0.930681	1.06004	1.11484	1.04665	1.0521	0.30816	0.406157	0.348044
YER174C	GRX4	0.848242	0.707441	0.706204	0.811376	0.793488	0.723421	0.856511	0.941434	1.03505	1.34335
YER175C	TMT1	0.755892	0.473955	0.654572	0.873836	0.934385	0.707941	0.873572	0.618391	0.757874	0.702242
YER175W-A	YER175W-A	0.755892	0.473955	0.654572	0.873836	0.934385	0.707941	0.873572	0.869557	0.964652	0.969463
YER176W	ECM32	0.853193	0.893514	0.824523	0.780992	0.993692	0.831375	0.867961	0.277073	0.355577	0.436998
YER177W	BMH1	0.418461	0.384408	0.397636	0.44165	0.528592	0.470329	0.601852	1.04474	1.0621	1.18338
YER178W	PDA1	0.751522	0.635695	0.523374	0.571355	0.705702	0.599966	0.706623	1.02553	1.0874	1.30623
YER179W	DMC1	0.763259	0.760256	0.926136	1.0104	1.05621	1.0206	0.969855	0.801424	0.805787	0.726698
YER180C	ISC10	0.756207	0.728134	0.692345	0.699515	0.841641	0.744855	0.783078	0.733489	0.781586	0.940286
YER180C-A	SLO1	0.753437	0.725167	0.687614	0.695402	0.838229	0.742044	0.77875	0.800754	0.93082	0.852558
YER182W	FMP10	1.06306	1.04013	0.985313	1.2024	1.31505	1.15779	1.18143	0.849028	0.859808	0.769643
YER183C	FAU1	1.04793	0.99507	0.949819	1.05166	1.17706	1.02824	1.03624	0.927786	0.890514	0.991338
YER184C	YER184C	1.09346	1.02706	0.698339	0.874068	0.916885	0.838165	0.919392	0.681356	0.980998	1.12795
YER185W	YER185W	1.09346	1.02706	0.698339	0.874068	0.916885	0.838165	0.919392	0.801582	0.831637	0.863303
YER186C	YER186C	1.06369	1.05629	0.983776	1.03603	1.05967	1.0974	1.08634	0.864985	0.933156	0.978951
YER187W	YER187W	0.835433	0.833498	0.835378	1.03858	0.898589	0.996611	1.12269	0.967449	0.952445	1.11333
YFL001W	DEG1	1.05383	1.02456	0.997022	0.932909	1.15221	0.983004	1.10105	0.961489	1.10555	1.0181
YFL002C	SPB4	1.05383	1.02456	0.997022	0.932909	1.15221	0.983004	1.10105	0.961489	1.10555	1.0181
YFL003C	MSH4	0.880648	0.787518	0.866489	0.920585	0.922646	0.934069	0.96319	0.714623	0.939737	1.06464
YFL004W	VTC2	1.1364	1.01473	0.996709	1.08974	1.29442	1.18084	1.25584	0.792156	0.938712	1.09167
YFL005W	SEC4	0.81241	0.808291	0.760205	0.864819	0.906966	0.950551	0.930897	0.671507	0.933483	0.779566
YFL007W	BLM10	0.969181	0.947511	0.937035	0.997249	0.928906	0.967158	0.964867	0.716214	0.755415	0.720644
YFL008W	SMC1	0.939134	0.921491	0.877744	0.886314	0.959201	0.895249	0.97071	0.616787	0.774641	0.838356
YFL009W	CDC4	1.01334	1.06973	0.954156	0.989957	1.04234	1.07165	1.06513	0.564046	0.772688	0.81963
YFL010C	WWM1	1.01334	1.06973	0.954156	0.989957	1.04234	1.07165	1.06513	0.294127	0.398236	0.366163
YFL010W-A	AUA1	0.649808	0.695429	0.848392	0.859401	0.882425	0.855813	0.857636	0.538886	0.638928	0.700348
YFL011W	HXT10	1.06772	0.998883	1.07845	1.15611	1.15412	1.13083	1.12739	1.00539	1.01957	0.977092
YFL012W	YFL012W	1.08374	1.08824	0.945734	0.949405	1.10253	0.991256	0.981768	0.504094	0.721358	0.664511
YFL013C	IES1	1.08374	1.08824	0.945734	0.949405	1.10253	0.991256	0.981768	0.740112	0.807177	0.926257
YFL014W	HSP12	0.434605	0.266616	0.31471	0.356597	0.443982	0.480655	0.410039	0.514884	0.674895	0.619834
YFL016C	MDJ1	0.434605	0.266616	0.31471	0.356597	0.443982	0.480655	0.410039	0.748065	0.981675	1.15013
YFL017C	GNA1	0.678444	0.59798	0.605329	0.644879	0.800798	0.722807	0.714888	0.901844	0.898176	0.988851
YFL017W-A	SMX2	1.19132	0.947952	0.883846	0.963181	1.23473	1.01042	1.18231	0.948406	1.3258	1.13984
YFL018C	LPD1	0.740576	0.604478	0.605268	0.650883	0.771116	0.654767	0.800318	0.751513	0.793687	0.889735
YFL021W	GAT1	0.632893	0.500924	0.350476	0.37833	0.434702	0.462064	0.483974	1.20625	1.22215	1.07654
YFL022C	FRS2	0.47152	0.49219	0.442151	0.41477	0.537513	0.460498	0.558941	0.574346	0.796354	0.789033
YFL023W	BUD27	0.603654	0.543555	0.555715	0.500206	0.723501	0.615205	0.681633	0.925997	0.886968	1.09649
YFL024C	EPL1	0.603654	0.543555	0.555715	0.500206	0.723501	0.615205	0.681633	1.11586	1.15116	1.19421
YFL025C	BST1	0.794721	0.783891	0.880936	0.983747	0.96993	0.916108	0.940648	0.625832	0.710222	0.740172
YFL026W	STE2	0.377084	0.218179	0.415989	0.652021	0.53255	0.734319	0.735181	0.468357	0.619894	0.636615
YFL027C	GYP8	0.740128	0.538033	0.823083	1.09672	1.07576	1.25212	1.25574	0.631638	0.815199	0.868899
YFL028C	CAF16	0.802056	0.716831	0.772002	0.798696	0.832367	0.783923	0.904058	0.927187	1.03223	1.14907
YFL029C	CAK1	1.02436	0.886728	0.91506	0.987803	1.01481	1.03532	1.09572	1.03058	0.964567	0.933405
YFL030W	AGX1	0.714778	0.701952	0.626857	0.664744	0.741613	0.720968	0.797487	0.70898	0.886477	0.959325
YFL031W	HAC1	0.545052	0.475533	0.487413	0.506591	0.638697	0.584969	0.633598	0.804163	0.866242	0.906572
YFL033C	RIM15	0.545052	0.475533	0.487413	0.506591	0.638697	0.584969	0.633598	0.836572	1.02488	1.04012
YFL034C-A	RPL22B	0.613233	0.554797	0.553631	0.61417	0.784284	0.645926	0.713032	0.979014	1.00463	1.13374
YFL034C-B	MOB2	0.652223	0.689093	0.730239	0.71244	0.944414	0.753903	0.8277	0.613534	0.656744	0.685698
YFL034W	YFL034W	0.613233	0.554797	0.553631	0.61417	0.784284	0.645926	0.713032	0.979014	1.00463	1.13374
YFL036W	RPO41	0.72769	0.718629	0.715385	0.814443	0.81176	0.773152	0.7862	0.64981	0.678952	0.958376
YFL037W	TUB2	0.767431	0.751818	0.640679	0.697944	0.812509	0.746392	0.715212	0.723412	0.788116	0.714497
YFL038C	YPT1	0.767431	0.751818	0.640679	0.697944	0.812509	0.746392	0.715212	0.791798	1.15372	1.03104
YFL039C	ACT1	0.45212	0.495596	0.514609	0.493244	0.739356	0.610578	0.701887	0.778212	0.947858	0.98284
YFL040W	YFL040W	0.500651	0.516826	0.764933	0.772703	0.784835	0.785843	0.790555	0.623702	0.652213	0.551382
YFL041W	FET5	0.987314	0.945575	0.888622	1.0175	1.08328	1.0292	1.07064	0.830478	1.02189	0.993478
YFL041W-A	YFL041W-A	1.40816	1.29771	1.19269	1.13415	1.12772	1.30301	1.22593	0.89226	0.988542	1.05045
YFL042C	YFL042C	1.40816	1.29771	1.19269	1.13415	1.12772	1.30301	1.22593	1.15355	1.26538	1.1911
YFL044C	OTU1	1.10066	1.06014	1.08289	1.10982	1.08224	1.12743	1.13836	1.03718	1.11045	0.96664
YFL045C	SEC53	0.882257	0.835127	0.827651	0.836659	0.932304	0.954316	0.928478	0.909193	0.888457	0.914714
YFL046W	FMP32	0.662506	0.655997	0.734101	0.810612	0.901524	0.765333	0.826074	0.82141	0.821292	0.883497
YFL047W	RGD2	0.906112	0.940955	0.843609	0.866939	0.820971	0.921881	0.89784	0.45747	0.677966	0.663356
YFL048C	EMP47	0.906112	0.940955	0.843609	0.866939	0.820971	0.921881	0.89784	0.516828	0.693914	0.622903
YFL049W	SWP82	0.780513	0.76826	0.797559	0.923436	1.02397	0.917593	0.918644	0.788854	0.805589	1.05767
YFL050C	ALR2	0.780513	0.76826	0.797559	0.923436	1.02397	0.917593	0.918644	0.74755	0.884636	0.943295
[truncated: 3,806 more rows]

## Sheet: 70genes_-1
Avg H3 Occ. in -1 nucleosome region for 70 SM-induced exemplar genes
[truncated: 76 more rows]

[truncated: 11 more sheets: 204genes_-1, 4744genes_-1, All genes_-1, 70genes_NDR, 204genes_NDR, 4744genes_NDR, All genes_NDR, 70genes_+1, 204genes_+1, 4744genes_+1, All genes_+1]
