# Supplementary material for: Genome-wide cooperation by HAT Gcn5, remodeler SWI/SNF, and chaperone Ydj1 in promoter nucleosome eviction and transcriptional activation
Source: HighWire-hosted journal article supplement (doi:10.1101/gr.196337.115), 2015-11-24
Supplement: File_S3.xlsx [file File_S3.xlsx]

## Sheet: snf2-ydj1
		WT-I vs	WT-I vs	WT-I vs	snf2∆ vs	ydj1∆ vs	Snf2-dep	Ydj1-dep
	Gene	snf2∆-I	ydj1∆-I	snf2∆ydj1∆	snf2∆ydj1∆	snf2∆ydj1∆	cols. C, G	cols. D, F
1	HOR7	0.012	0.813	0.002	0.069	0.0076375
2	LEU4	0.087	0.722	0.004	0.278	0.00260898
3	YPR036W-A	0.043*	0.034*	0.279	0.118	0.00335209
4	ICY2	0.228	0.027*	0.778	0.053*	0.100645
5	ARG1	0.813	0.008	0.009	0.087	0.194757
6	HIS4	0.003	0.013	0.002	0.084*	0.00777914
7	ADH5	0.00015	0.099	0.028	0.2	0.22685
8	ORT1	0.022	0.07	0.024	0.409	0.107324
9	ARG4	0.089	0.009	0.007	0.448	0.0684683
10	MCH4	0.003	0.364	0.005	0.084	0.00508252
11	ARO10	0.003	0.004	7e-05	0.019	0.00119691
12	YGL117W	0.029	0.211	0.004	0.419	0.0443774
13	ARG3	0.137	0.082	0.019	0.221	0.0104959
14	RTS3	0.064*	0.058*	0.098*	0.523	0.113871
15	HOM3	0.009	0.069	0.004	0.009	0.0267523
16	MMF1	0.003	0.013	0.003	0.031	0.0197681
17	ARG5,6	0.542	0.58	0.175	0.247	0.317048
18	YHR022C	0.06	0.013	0.001	0.275	0.00899535
19	ARO1	0.421	0.12	0.193	0.844	0.0894166
20	LYS20	0.07	0.7	0.041	0.888	0.0869125
21	LYS21	0.669	0.882	0.004	0.179	0.117779
22	TRP4	0.031	0.114	0.046	0.644	0.0827087
23	HIS5	0.127	0.104	0.038	0.462	0.172932
24	HIS1	0.161	0.133	0.012	0.873	0.146799
25	CPA1	0.235	0.125	0.036	0.013	0.106684
26	YPS1	0.067	0.717	0.023	0.471	0.01298
27	ESBP6	0.01	0.054	0.01	0.012	0.136366
28	ARG7	0.987	0.278	0.267	0.361	0.16305
29	ARO4	0.161	0.0133	0.007	0.956	0.00432459
30	AGA2	0.019	0.008	0.002	0.295	0.0251324
31	MPC2	0.453	0.401	0.198	0.347	0.302902
32	CIT2	0.163	0.003*	0.036	0.323	0.00403149
33	YPL264C	0.034	0.047	0.039	0.054*	0.926616
34	TEA1	0.064	0.017	0.017	0.044	0.0205228
35	TRP3	0.994	0.009*	0.013	0.439	0.0111287
36	GSY2	0.28	0.582	0.016	0.016	0.00972876
37	HIS7	0.066	0.069	0.065	0.435	0.233904
		WT-I vs	WT-I vs	WT-I vs	snf2∆ vs	ydj1∆ vs	Snf2-dep	Ydj1-dep
	Gene	snf2∆-I	ydj1∆-I	snf2∆ydj1∆	snf2∆ydj1∆	snf2∆ydj1∆	cols. C,G	cols. D,F
38	BAR1	0.047	0.009	0.017	0.455	0.0251794
39	STR3	0.564	0.125	0.246	0.733	0.740222
40	ISU1	0.347	0.596	0.049	0.124	0.00341986
41	STE2	0.02	0.02	0.002	0.31	0.0113264
42	PHM7	0.678	0.73	0.203	0.047	0.022083
43	CPA2	0.347	0.798	0.046	0.177	0.0243595
44	WTM1	0.014	0.822	0.0026	0.035	0.0023481
45	SDH6	0.061	0.379	0.009	0.077	0.0281961
46	MCT1	0.087	0.714	0.06	0.29	0.0311821
47	HSP12	0.005	0.104	0.022	0.084	0.0313002
48	PIC2	0.023	0.058	0.004	0.092	0.0339637
49	TMT1	0.05	0.106	0.014	0.124	0.314868
50	BSC5	0.003	0.04	0.089	0.048	0.642503
51	NRG1	0.068	0.166	0.011	0.718	0.0837718
52	DDR2	0.051	0.004	0.008	0.131	0.0118864
53	AGA1	0.004	0.0045	0.0001	0.034	0.0592265
54	BAT2	0.013	0.118	0.03	0.475	0.0636433
55	SST2	0.001	0.012	0.005	0.236	0.0299758
56	ARO8	0.283	0.719	0.047	0.962	0.324182
57	YBT1	0.044	0.328	0.076	0.245	0.069568
58	NCE103	0.438	0.706	0.023	0.915	0.0852024
59	PRM5	0.088	0.169	0.007	0.917	0.131891
60	TPN1	0.122	0.123	0.005	0.587	0.211683
61	YDL025C	0.063	0.673	0.107	0.549	0.141107
62	FMP23	0.058	0.059	0.112	0.618	0.310298
63	CTT1	0.849	0.52	0.127	0.032	0.00320645
64	PYC2	0.316	0.029	0.032	0.087	0.0381117
65	UGP1	0.092	0.009	0.008	0.132	0.0178043
66	ACO1	0.146	0.037*	0.008	0.001	0.00306908
77	YDR531W	0.48	0.401	0.061	0.407	0.130857
68	GGC1	0.826	0.658	0.564	0.794	0.840841
69	TPO1	0.106	0.924	0.0001	0.751	0.0783751
70	YJR154W	0.168	0.478	0.005	0.935	0.233963
		WT-I vs	WT-I vs	WT-I vs	snf2∆ vs	ydj1∆ vs	Snf2-dep	Ydj1-dep
		snf2∆-I	ydj1∆-I	snf2∆ydj1∆	snf2∆ydj1∆	snf2∆ydj1∆	cols. C,G	cols. D,F
	p ≤ 0.01	11	8	28	2	15	23	10
	p ≤ 0.05, >0.01	14	10	24	11	19	21	16
	p < 0.05	25	18	52	13	34	44	26
	p > 0.05	45	52	18	57	36	26	44
	Total	70	70	70	70	70	70	70

## Sheet: gcn5-ydj1
		WT-I vs	WT-I vs	WT-I vs	gcn5∆ vs	ydj1∆ vs	Gcn5-dep	Ydj1-dep
	Gene	gcn5∆-I	ydj1∆-I	gcn5∆ydj1∆	gcn5∆ydj1∆	gcn5∆ydj1∆	cols. C, G	cols. D, F
1	HOR7	0.105	0.813	0.137	0.526	0.164225
2	LEU4	0.079	0.722	0.058	0.976	0.0510163
3	YPR036W-A	0.118	0.034*	0.363	0.234	0.0367396
4	ICY2	0.083	0.027*	0.051	0.12	0.00209348
5	ARG1	0.129	0.008	0.045	0.103	0.283652
6	HIS4	0.205	0.013	0.019	0.047	0.0305512
7	ADH5	0.035	0.099	0.013	0.661	0.0228555
8	ORT1	0.039	0.07	0.004	0.043	0.00176286
9	ARG4	0.118	0.009	0.011	0.295	0.021006
10	MCH4	0.023	0.364	0.009	0.487	0.0275578
11	ARO10	0.0001	0.004	0.032	0.429	0.107325
12	YGL117W	0.026	0.211	0.008	0.351	0.0104507
13	ARG3	0.019	0.082	0.001	0.658	0.0184564
14	RTS3	0.248	0.058*	0.007*	0.469	0.437319
15	HOM3	0.012	0.069	0.03	0.713	0.0556331
16	MMF1	0.013	0.013	0.016	0.222	0.0427471
17	ARG5,6	0.032	0.58	0.124	0.278	0.0560278
18	YHR022C	0.006	0.013	0.022	0.235	0.0363574
19	ARO1	0.008	0.12	0.012	0.099	9.32773e-05
20	LYS20	0.883	0.7	0.062	0.282	0.113645
21	LYS21	0.232	0.882	0.142	0.567	0.00183118
22	TRP4	0.072	0.114	0.039	0.192	0.0463601
23	HIS5	0.023	0.104	0.06	0.745	0.0303337
24	HIS1	0.025	0.133	0.013	0.199	0.227643
25	CPA1	0.02	0.125	0.021	0.335	0.25373
26	YPS1	0.004	0.717	0.014	0.587	0.00236919
27	ESBP6	0.028	0.054	0.044	0.119	0.172217
28	ARG7	0.026	0.278	0.06	0.221	0.0699315
29	ARO4	0.005	0.0133	0.03	0.279	0.0447274
30	AGA2	0.025	0.008	0.003	0.81	0.0083189
31	MPC2	0.237	0.401	0.078	0.111	0.000195581
32	CIT2	0.32	0.003*	0.274	0.386	0.0224194
33	YPL264C	0.032	0.047	0.045	0.019	0.233898
34	TEA1	0.016	0.017	0.021	0.286	0.0217554
35	TRP3	0.014	0.009*	0.08	0.901	0.0280279
36	GSY2	0.006	0.582	0.055	0.709	0.0652699
37	HIS7	0.006	0.069	0.01	0.282	0.0407234
		WT-I vs	WT-I vs	WT-I vs	gcn5∆ vs	ydj1∆ vs	Gcn5-dep	Ydj1-dep
	Gene	gcn5∆-I	ydj1∆-I	gcn5∆ydj1∆	gcn5∆ydj1∆	gcn5∆ydj1∆	cols. C, G	cols. D, F
38	BAR1	0.0096	0.009	0.003	0.66	0.00291556
39	STR3	0.202	0.125	0.011	0.812	0.283754
40	ISU1	0.08	0.596	0.297	0.698	0.497271
41	STE2	0.005	0.02	0.003	0.062	0.0227941
42	PHM7	0.637	0.73	0.12	0.651	0.173172
43	CPA2	0.023	0.798	0.05	0.005*	0.0236486
44	WTM1	0.007	0.822	0.017	0.489	0.0400563
45	SDH6	9e-05	0.379	0.039	0.949	0.139549
46	MCT1	0.115	0.714	0.009	0.165	0.00569748
47	HSP12	0.0007	0.104	0.027	0.281	0.109351
48	PIC2	0.015	0.058	0.003	0.348	0.00485326
49	TMT1	0.027	0.106	0.002	0.431	0.0525244
50	BSC5	0.006	0.04	0.006	0.006	0.0247777
51	NRG1	0.052	0.166	0.15	0.267	0.122487
52	DDR2	0.043	0.004	0.03	0.086	0.0639755
53	AGA1	0.012	0.0045	0.011	0.259	0.38495
54	BAT2	0.023	0.118	0.003	0.672	0.0284861
55	SST2	0.003	0.012	0.00156	0.568	0.00668609
56	ARO8	0.061	0.719	0.081	0.659	0.00281473
57	YBT1	0.013	0.328	0.051	0.262	0.0964186
58	NCE103	0.009	0.706	0.348	0.393	0.377306
59	PRM5	0.031	0.169	0.007	0.183	0.00961306
60	TPN1	0.011	0.123	0.029	0.38	0.00369165
61	YDL025C	0.006	0.673	0.09	0.982	0.0406941
62	FMP23	0.07	0.059	0.013	0.643	0.0184983
63	CTT1	0.554	0.52	0.98	0.426	0.00846693
64	PYC2	0.126	0.029	0.049	0.884	0.0665291
65	UGP1	0.021	0.009	0.023	0.086	0.0414906
66	ACO1	0.028	0.037*	0.072	0.595	0.0543296
77	YDR531W	0.025	0.401	0.132	0.349	0.0726449
68	GGC1	0.007*	0.658	0.054	0.042	0.0138555
69	TPO1	0.151	0.924	0.139	0.387	0.0171519
70	YJR154W	0.0005	0.478	0.081	0.148	0.00329551
		WT-I vs	WT-I vs	WT-I vs	gcn5∆ vs	ydj1∆ vs	Gcn5-dep	Ydj1-dep
		gcn5∆-I	ydj1∆-I	gcn5∆ydj1∆	gcn5∆ydj1∆	gcn5∆ydj1∆	cols. C, G	cols. D, F
	p ≤ 0.01	17	8	15	1	17	29	9
	p ≤ 0.05, >0.01	29	10	29	4	25	31	11
	p < 0.05	46	18	44	5	42	60	20
	p > 0.05	24	52	26	65	28	10	50
	Total	70	70	70	70	70	70	70
