# Supplementary material for: Genome-wide cooperation by HAT Gcn5, remodeler SWI/SNF, and chaperone Ydj1 in promoter nucleosome eviction and transcriptional activation
Source: HighWire-hosted journal article supplement (doi:10.1101/gr.196337.115), 2015-11-24
Supplement: File_S4.xlsx [file File_S4.xlsx]

## Sheet: 70genes_Rpb3 avg
Rpb3 Occ. averaged over CDS for 70 SM-induced exemplar genes
Systematic name	Common name	WT-U	WT-I	ydj1∆-I	snf2∆-I	gcn5∆-I	snf2∆ydj1∆/lcGCN4-I	gcn5∆ydj1∆-I	Ptet-SNF2-I	Ptet-SNF2gcn5∆-I	Ptet-SNF2gcn5∆ydj1∆/lcGCN4-I
YMR251W-A	HOR7	1238.74	3706.44	3494.71	2556.01	2637.25	1651.05	2918.11	2307.29	1703.49	1346.65
YNL104C	LEU4	220.385	1031.6	1017.96	1637.87	1372.71	1500.73	1400.46	1509.28	1596.46	1500.66
YPR036W-A	YPR036W-A	1686.25	6630.69	6790.68	7668.41	5094.27	3906.17	5199.05	4900.14	5704.35	5178.18
YPL250C	ICY2	361.354	3112.75	4144.48	5150.56	2893.35	3268.38	3504.03	3737.33	3748.78	3690.72
YOL058W	ARG1	153.415	3105.72	1943.18	4700.89	4260.58	2136.1	3204.35	3592.54	3993.71	2573.06
YCL030C	HIS4	187.018	2245.68	1504.92	682.15	2218.87	885.138	1553.06	2022.25	1002.42	706.245
YBR145W	ADH5	97.1701	1078.99	1071.46	1129.37	664.077	1193.8	535.311	1303.99	634.553	381.919
YOR130C	ORT1	112.845	418.835	322.889	317.144	250.213	309.93	265.022	368.637	301.08	270.876
YHR018C	ARG4	302.739	3682.67	2592.64	2867.32	2571.19	2145.25	1705.72	3525.15	2124.19	1426.04
YOL119C	MCH4	77.0604	748.136	504.927	414.53	516.249	476.445	345.549	790.102	363.726	230.571
YDR380W	ARO10	161.007	858.051	214.796	122.332	271.981	87.4164	211.483	313.332	152.045	115.655
YGL117W	YGL117W	242.093	1545.92	1180.45	487.989	846.89	553.898	676.474	1128.97	725.496	376.485
YJL088W	ARG3	99.4966	2434.74	697.991	2249.58	2786.71	1037.82	2238.45	2638.59	3249.43	1722.92
YGR161C	RTS3	130.616	497.095	1494.41	3069.43	1088.7	1870	1742.78	1130.98	1957.32	1885.81
YER052C	HOM3	193.258	1222.03	1099.48	740.8	814.613	669.044	646.157	960.93	664.621	556.441
YIL051C	MMF1	688.493	1354.05	720.902	742.334	525.326	463.036	408.975	880.046	397.265	357.613
YER069W	ARG5,6	128.927	1612.99	640.719	1918.84	2303.21	1152.53	1597.49	2014.61	2295.5	1427.59
YHR022C	YHR022C	136.636	368.272	158.849	171.2	315.08	86.1345	209.728	204.812	181.24	123.834
YDR127W	ARO1	181.722	488.058	500.131	516.701	391.464	478.44	415.552	584.995	426.051	401.143
YDL182W	LYS20	285.561	957.65	1366.84	1332.06	2124.74	1388.47	1663.95	1522.44	1533.95	1376.11
YDL131W	LYS21	225.146	574.335	627.494	883.416	785.344	1105.53	621.966	939.697	846.535	672.565
YDR354W	TRP4	137.085	461.295	530.212	432.444	493.579	507.396	355.132	470.242	352.24	248.949
YIL116W	HIS5	185.322	1569.19	967.176	1148.93	1590.72	1246.05	1202.39	1636.96	1212.36	831.71
YER055C	HIS1	326.843	1211.45	860.182	1211.39	953.544	1066.71	857.449	1379.06	1002.59	614.868
YOR303W	CPA1	273.916	1786.08	1257.83	2464.99	2715.23	1608.21	2570.74	2463.81	2765.52	2198.27
YLR120C	YPS1	209.071	458.354	776.644	411.682	240.721	290.973	315.765	330.982	252.242	330.271
YNL125C	ESBP6	110.746	315.25	189.064	247.271	274.174	202.862	199.123	234.639	210.497	166.527
YMR062C	ARG7	119.85	1460.9	880.664	929.73	1094.07	805.248	1049.56	1328.05	1125.08	945.438
YBR249C	ARO4	254.013	747.792	506.053	698.826	581.473	720.216	517.898	829.495	645.181	423.037
YGL032C	AGA2	346.728	1636.44	323.447	167.446	240.802	197.061	242.08	253.996	150.35	317.446
YHR162W	MPC2	543.591	2139.45	2027.01	2994.39	2607.02	1672.01	1957.91	2621.52	2574.4	1838.72
YCR005C	CIT2	562.062	1440.17	4211.56	1530.84	1719.34	1025.09	2048.88	2366.78	2607.91	2384.49
YPL264C	YPL264C	121.269	454.986	346.299	351.868	345.294	418.628	235.135	564.96	318.499	166.785
YOR337W	TEA1	93.4836	247.916	252.168	196.48	200.893	214.959	150.496	246.037	189.325	152.391
YKL211C	TRP3	157.531	612.46	674.892	687.294	621.876	659.231	510.068	793.432	685.915	515.032
YLR258W	GSY2	246.216	494.76	417.855	311.795	287.466	152.521	371.885	321.898	223.792	183.313
YBR248C	HIS7	176.104	534.673	343.302	401.142	335.961	467.941	272.18	594.354	381.401	314.817
YIL015W	BAR1	608.46	1323.18	560.021	185.959	291.291	123.903	148.869	434.049	97.0495	100.313
YGL184C	STR3	65.2262	853.68	180.59	371.168	363.909	466.849	221.336	639.27	286.713	186.008
YPL135W	ISU1	444.341	1373.97	1309.81	1607.06	1081.62	1407.08	1494.08	1455.2	1030.58	728.161
YFL026W	STE2	1374.72	2683.8	962.415	447.553	865.15	286.82	395.176	922.358	402.854	225.577
YOL084W	PHM7	116.444	310.232	174.549	181.056	217.545	49.3056	156.523	84.613	68.4663	76.4395
YJR109C	CPA2	155.166	2210.66	1723.47	2228.21	2204.29	1646.77	2033.95	2279.44	2372.19	1901.76
YOR230W	WTM1	223.291	466.958	465.31	347.312	267.007	240.078	261.51	476.515	196.624	143.859
YDR379C-A	SDH6	165.747	386.308	273.978	198.956	248.71	117.584	244.771	253.001	291.57	147.492
YOR221C	MCT1	99.6988	340.569	218.823	228.9	249.989	277.715	217.561	276.53	284.474	196.05
YFL014W	HSP12	599.674	1614.09	398.629	391.036	471.221	81.2246	630.234	238.257	186.719	106.095
YER053C	PIC2	229.293	739.658	434.797	468.595	341.99	296.441	351.554	548.74	329.594	323.951
YER175C	TMT1	135.638	1305.46	630.521	400.804	468.255	664.072	279.598	727.548	322.956	165.391
YNR069C	BSC5	82.0499	296.644	308.347	132.35	108.577	295.072	135.977	276.916	92.6755	172.547
YDR043C	NRG1	374.801	824.355	587.418	485.218	617.016	338.776	492.245	384.161	343.445	391.932
YOL052C-A	DDR2	401.046	1014.43	408.729	303.43	290.433	159.13	307.954	134.645	124.049	135.71
YNR044W	AGA1	191.682	711.703	192.389	133.116	191.748	78.9055	126.022	156.093	117.683	95.7262
YJR148W	BAT2	111.758	235.431	285.618	187.233	176.857	143.163	137.092	246.274	131.058	103.136
YLR452C	SST2	342.044	871.872	244.433	137.302	214.852	117.97	141.561	265.456	99.9731	112.749
YGL202W	ARO8	177.104	529.416	393.636	471.011	377.496	482.168	375.22	566.36	424.232	424.297
YLL048C	YBT1	145.297	319.62	170.855	215.873	252.825	260.035	200.481	288.57	219.344	219.725
YNL036W	NCE103	377.735	1477.28	1566.14	1771.37	1165.07	1385.89	2396.84	1372.62	836.405	631.674
YIL117C	PRM5	130.683	484.968	300.408	420.892	223.218	335.019	209.025	442.787	315.34	296.902
YGL186C	TPN1	138.114	266.478	192.611	177.022	182.524	265.199	150.101	246.009	181.937	163.324
YDL025C	YDL025C	122.539	401.162	249.282	216.942	257.876	232.868	196.235	284.42	212.436	176.671
YBR047W	FMP23	70.0967	312.158	140.326	147.16	215.836	204.904	124.541	257.028	165.239	100.651
YGR088W	CTT1	154.955	352.161	205.331	212.048	333.168	128.799	269.203	152.079	161.025	109.731
YBR218C	PYC2	155.861	532.171	419.025	609.659	638.78	397.804	425.594	561.178	491.114	323.215
YKL035W	UGP1	512.127	1096.55	638.973	673.661	402.709	253.081	434.733	465.299	285.464	223.144
YLR304C	ACO1	312.709	737.45	807.863	608.82	560.79	291.296	533.043	591.337	589.041	601.735
YDR531W	YDR531W	133.955	260.366	197.7	206.826	237.399	336.284	225.227	328.338	258.228	229.839
YDL198C	GGC1	220.057	1098.49	529.015	627.113	614.191	747.767	432.446	1114.43	559.341	555.62
YLL028W	TPO1	247.254	492.306	485.1	215.398	399.103	176.001	424.29	209.398	126.119	168.655
YJR154W	YJR154W	80.7414	198.835	183.556	158.628	183.305	222.825	180.669	231.406	208.876	137.31

## Sheet: 211genes_Rpb3 avg
Rpb3 Occ averaged over CDS for 211 SM-induced genes
Systematic name	Common name	WT-U	WT-I	ydj1∆-I	snf2∆-I	gcn5∆-I	snf2∆ydj1∆/lcGCN4-I	gcn5∆ydj1∆-I	Ptet-SNF2-I	Ptet-SNF2gcn5∆-I	Ptet-SNF2gcn5∆ydj1∆/lcGCN4-I
YAL028W	FRT2	80.4463	173.474	156.425	193.709	118.347	85.1215	126.134	181.491	157.308	196.415
YAL048C	GEM1	89.8881	204.802	175.029	139.535	179.967	151.008	206.462	182.185	158.927	144.94
YBL043W	ECM13	46.175	272.301	196.525	294.875	290.247	360.275	354.911	193.355	167.911	218.551
YBL101C	ECM21	120.868	332.66	249.947	207.673	171.21	189.858	178.584	209.771	162.06	169.418
YBL102W	SFT2	162.948	379.497	290.25	302.452	228.735	304.974	319.065	368.343	321.317	269.695
YBL103C	RTG3	114.706	258.864	211.141	247.914	282.23	292.356	244.346	336.263	298.442	191.302
YBR035C	PDX3	242.256	470.698	336.779	483.536	324.321	440.481	326.348	495.906	334.118	218.267
YBR046C	ZTA1	83.2611	235.144	142.969	181.414	106.017	137.455	138.29	236.366	144.558	119.561
YBR047W	FMP23	70.0967	312.158	140.326	147.16	215.836	204.904	124.541	257.028	165.239	100.651
YBR104W	YMC2	121.411	296.615	333.192	371.305	355.854	407.262	292.206	404.907	410.179	287.699
YBR105C	VID24	128.35	301.376	261.044	322.617	344.927	318.521	262.888	401.131	254.288	243.324
YBR145W	ADH5	97.1701	1078.99	1071.46	1129.37	664.077	1193.8	535.311	1303.99	634.553	381.919
YBR147W	YBR147W	55.9627	744.152	250.133	361.301	359.214	418.053	326.58	486.661	249.564	190.723
YBR166C	TYR1	140.068	260.627	208.784	188.027	231.988	323.758	196.553	258.047	230.771	163.099
YBR214W	SDS24	149.381	283.607	269.709	299.457	238.221	162.112	238.088	302.969	220.982	177.548
YBR218C	PYC2	155.861	532.171	419.025	609.659	638.78	397.804	425.594	561.178	491.114	323.215
YBR248C	HIS7	176.104	534.673	343.302	401.142	335.961	467.941	272.18	594.354	381.401	314.817
YBR249C	ARO4	254.013	747.792	506.053	698.826	581.473	720.216	517.898	829.495	645.181	423.037
YBR256C	RIB5	200.749	1145.4	628.128	813.91	660.868	879.394	610.565	1251.62	818.216	687.022
YCL009C	ILV6	222.324	694.643	625.532	919.333	441.355	678.928	462.303	743.995	509.489	448.74
YCL027W	FUS1	125.403	388.079	125.364	93.786	108.39	76.265	89.5967	137.756	88.2322	91.2715
YCL030C	HIS4	187.018	2245.68	1504.92	682.15	2218.87	885.138	1553.06	2022.25	1002.42	706.245
YCL064C	CHA1	214.172	925.943	462.953	418.916	661.913	81.6814	620.241	408.141	396.734	317.838
YCR005C	CIT2	562.062	1440.17	4211.56	1530.84	1719.34	1025.09	2048.88	2366.78	2607.91	2384.49
YDL025C	YDL025C	122.539	401.162	249.282	216.942	257.876	232.868	196.235	284.42	212.436	176.671
YDL054C	MCH1	73.9114	434.307	334.309	351.495	316	400.735	228.796	422.628	264.723	198.661
YDL066W	IDP1	178.038	516.453	673.097	481.233	547.466	473.433	424.963	684.664	585.359	467.563
YDL131W	LYS21	225.146	574.335	627.494	883.416	785.344	1105.53	621.966	939.697	846.535	672.565
YDL170W	UGA3	90.5388	510.056	326.535	402.477	394.079	368.781	283.259	567.059	430.45	274.282
YDL182W	LYS20	285.561	957.65	1366.84	1332.06	2124.74	1388.47	1663.95	1522.44	1533.95	1376.11
YDL198C	GGC1	220.057	1098.49	529.015	627.113	614.191	747.767	432.446	1114.43	559.341	555.62
YDL222C	FMP45	153.978	430.988	192.293	218.79	114.241	115.276	134.454	131.003	156.56	99.2584
YDL223C	HBT1	91.5922	199.352	135.146	112.972	95.1002	73.923	112.394	113.72	87.1107	80.0457
YDR011W	SNQ2	170.791	385.452	422.976	341.706	460.97	378.473	480.307	293.203	339.661	374.592
YDR019C	GCV1	194.329	486.952	220.432	153.587	153.501	106.206	149.772	218.603	111.519	97.6504
YDR035W	ARO3	180.835	1066.62	698.082	1019.74	1069.92	1029.14	803.904	1252.57	905.016	710.19
YDR043C	NRG1	374.801	824.355	587.418	485.218	617.016	338.776	492.245	384.161	343.445	391.932
YDR119W-A	YDR119W-A	119.978	329.989	192.616	161.04	391.121	140.29	223.506	183.336	217.083	122.326
YDR127W	ARO1	181.722	488.058	500.131	516.701	391.464	478.44	415.552	584.995	426.051	401.143
YDR158W	HOM2	264.539	985.662	660.17	1297.81	723.996	1181.97	530.499	1194.01	798.633	541.319
YDR236C	FMN1	162.605	622.936	406.36	244.23	300.428	268.654	348.932	405.633	295.661	195.2
YDR242W	AMD2	125.25	276.593	303.77	258.553	304.325	387.581	263.28	362.893	323.125	292.256
YDR258C	HSP78	179.469	641.794	736.897	627.751	607.051	788.53	704.944	618.775	670.274	494.85
YDR354W	TRP4	137.085	461.295	530.212	432.444	493.579	507.396	355.132	470.242	352.24	248.949
YDR379C-A	YDR379C-A	165.747	386.308	273.978	198.956	248.71	117.584	244.771	253.001	291.57	147.492
YDR380W	ARO10	161.007	858.051	214.796	122.332	271.981	87.4164	211.483	313.332	152.045	115.655
YDR425W	SNX41	105.076	395.762	216.01	132.38	191.268	194.331	231.939	262.332	167.729	143.117
YDR461C-A	YDR461C-A	444.521	1024.02	368.701	225.748	131.352	188.485	156.203	379.82	169.218	87.0193
YDR481C	PHO8	125.113	330.017	349.721	302.238	246.142	356.716	253.446	369.651	288.885	270.514
YDR482C	CWC21	94.1438	228.53	288.082	276.267	160.898	180.63	190.598	151.58	162.442	160.157
YDR487C	RIB3	177.776	346.514	273.049	500.309	335.271	377.357	290.026	425.359	415.396	284.57
YDR531W	YDR531W	133.955	260.366	197.7	206.826	237.399	336.284	225.227	328.338	258.228	229.839
YDR533C	HSP31	194.787	490.056	287.572	191.488	285.41	184.517	305.896	228.203	230.512	188.92
YEL063C	CAN1	191.652	410.515	310.851	363.033	330.936	343.327	334.12	451.064	311.833	272.358
YEL071W	DLD3	334.563	898.76	2167.28	1141.3	1233.9	1220.27	932.494	1625.98	1660.66	1609.02
YER024W	YAT2	130.375	377.327	430.302	410.137	480.201	568.883	296.521	737.652	523.714	319.918
YER037W	PHM8	192.336	676.485	305.055	248.382	208.885	129.305	205.115	304.426	167.527	163.371
YER040W	GLN3	117.997	243.189	224.557	270.856	305.161	306.101	247.517	317.518	283.416	256.813
YER052C	HOM3	193.258	1222.03	1099.48	740.8	814.613	669.044	646.157	960.93	664.621	556.441
YER053C	PIC2	229.293	739.658	434.797	468.595	341.99	296.441	351.554	548.74	329.594	323.951
YER055C	HIS1	326.843	1211.45	860.182	1211.39	953.544	1066.71	857.449	1379.06	1002.59	614.868
YER069W	ARG5,6	128.927	1612.99	640.719	1918.84	2303.21	1152.53	1597.49	2014.61	2295.5	1427.59
YER086W	ILV1	183.776	365.076	285.012	367.93	385.564	373.442	291.374	441.686	389.034	292.164
YER090W	TRP2	155.604	526.752	379.586	502.58	549.019	547.669	377.185	638.129	530.123	400.83
YER091C	MET6	495.849	1279.26	548.677	960.107	1008.09	1814.37	517.047	1455.39	1093.36	1116.14
YER175C	TMT1	135.638	1305.46	630.521	400.804	468.255	664.072	279.598	727.548	322.956	165.391
YFL014W	HSP12	599.674	1614.09	398.629	391.036	471.221	81.2246	630.234	238.257	186.719	106.095
YFL026W	STE2	1374.72	2683.8	962.415	447.553	865.15	286.82	395.176	922.358	402.854	225.577
YFL028C	CAF16	105.714	336.59	218.047	260.009	338.82	338.595	214.543	348.925	229.052	206.825
YFL029C	CAK1	80.312	165.484	219.468	179.604	154.543	137.058	130.363	197.946	164.611	125.473
YFR030W	MET10	122.561	259.938	203.711	200.305	335.383	389.394	226.195	334.014	270.654	217.193
YFR044C	YFR044C	117.206	275.426	257.16	275.113	206.238	212.619	212.734	265.439	247.678	205.88
YFR045W	YFR045W	104.648	313.123	259.842	230.674	212.714	243.061	190.912	302.256	206.757	196.973
YGL025C	PGD1	132.692	380.989	355.421	504.622	309.177	633.314	213.596	449.285	244.867	283.009
YGL026C	TRP5	162.045	557.614	461.097	635.767	501.98	583.136	468.438	742.591	573.903	418.805
YGL032C	AGA2	346.728	1636.44	323.447	167.446	240.802	197.061	242.08	253.996	150.35	317.446
YGL059W	YGL059W	131.583	483.51	250.555	347.911	359.825	450.572	316.629	493.04	354.729	265.804
YGL062W	PYC1	153.649	278.402	913.33	608.676	287.518	680.832	319.705	429.127	248.105	345.338
YGL117W	YGL117W	242.093	1545.92	1180.45	487.989	846.89	553.898	676.474	1128.97	725.496	376.485
YGL125W	MET13	193.251	779.713	553.647	1398.52	1029.98	1419.65	750.044	1260.88	1226.68	786.512
YGL148W	ARO2	207.784	357.434	347.258	519.524	360.797	465.937	312.429	456.208	380.867	282.509
YGL180W	ATG1	76.3783	338.209	209.209	215.415	300.624	323.734	230.233	368.274	190.952	137.26
YGL181W	GTS1	121.011	369.962	308.985	319.582	291.657	425.478	239.927	453.038	283.472	179.805
YGL184C	STR3	65.2262	853.68	180.59	371.168	363.909	466.849	221.336	639.27	286.713	186.008
YGL185C	YGL185C	129.595	374.452	212.268	183.729	201.423	279.687	164.444	279.494	177.738	213.448
YGL186C	TPN1	138.114	266.478	192.611	177.022	182.524	265.199	150.101	246.009	181.937	163.324
YGL202W	ARO8	177.104	529.416	393.636	471.011	377.496	482.168	375.22	566.36	424.232	424.297
YGL224C	SDT1	242.296	571.34	326.17	534.548	413.346	677.189	373.221	757.197	391.497	354.258
YGR019W	UGA1	237.957	523.505	451.038	456.437	267.968	379.441	266.155	466.225	283.569	178.384
YGR043C	YGR043C	72.8507	167.334	118.216	142.69	109.043	99.0924	117.448	110.715	93.8384	166.03
YGR065C	VHT1	140.593	689.479	400.851	267.06	428.829	531.802	265.866	358.218	309.524	268.347
YGR066C	YGR066C	57.6513	119.262	83.1805	97.4512	106.004	91.2733	118.177	166.939	103.383	153.665
YGR088W	CTT1	154.955	352.161	205.331	212.048	333.168	128.799	269.203	152.079	161.025	109.731
YGR161C	RTS3	130.616	497.095	1494.41	3069.43	1088.7	1870	1742.78	1130.98	1957.32	1885.81
YGR248W	SOL4	102.122	201.566	140.164	203.811	97.4987	115.414	133.878	165.16	123.236	154.061
YGR288W	MAL13	77.1034	137.718	167.054	169.126	164.36	198.354	133.389	211.237	158.724	204.572
YHL021C	FMP12	169.864	817.034	510.846	342.991	294.181	170.622	352.324	502.542	233.988	144.519
YHL036W	MUP3	118.924	334.831	168.985	150.522	156.404	194.11	155.039	224.435	192.388	175.206
YHR018C	ARG4	302.739	3682.67	2592.64	2867.32	2571.19	2145.25	1705.72	3525.15	2124.19	1426.04
YHR022C	YHR022C	136.636	368.272	158.849	171.2	315.08	86.1345	209.728	204.812	181.24	123.834
YHR029C	YHI9	104.233	329.268	194.715	244.881	268	329.544	264.136	444.727	242.186	187.225
YHR030C	SLT2	131.047	284.093	187.796	224.726	138.671	186.514	165.299	245.119	220.472	200.662
YHR047C	AAP1	84.3406	205.014	198.486	202.299	185.657	223.744	187.795	250.296	261.867	187.326
YHR071W	PCL5	221.976	1898.32	1081.07	1899.88	2234.62	1538.68	1702.47	1753.96	1917.6	1389.05
YHR096C	HXT5	64.8305	135.047	101.28	301.958	88.2732	130.256	104.45	136.863	107.288	79.2512
YHR137W	ARO9	64.9501	913.142	189.932	209.803	343.645	76.3706	284.484	457.651	123.879	140.29
YHR162W	YHR162W	543.591	2139.45	2027.01	2994.39	2607.02	1672.01	1957.91	2621.52	2574.4	1838.72
YIL015W	BAR1	608.46	1323.18	560.021	185.959	291.291	123.903	148.869	434.049	97.0495	100.313
YIL051C	MMF1	688.493	1354.05	720.902	742.334	525.326	463.036	408.975	880.046	397.265	357.613
YIL094C	LYS12	212.824	429.554	345.046	321.945	367.882	396.565	360.427	436.686	443.37	288.853
YIL113W	SDP1	95.9254	175.136	161.603	168.812	112.654	126.39	144.029	127.321	120.488	119.98
YIL116W	HIS5	185.322	1569.19	967.176	1148.93	1590.72	1246.05	1202.39	1636.96	1212.36	831.71
YIL117C	PRM5	130.683	484.968	300.408	420.892	223.218	335.019	209.025	442.787	315.34	296.902
YIL136W	OM45	164.104	311.887	237.75	287.431	191.593	165.662	237.882	227.86	156.141	118.115
YIL152W	YIL152W	156.198	263.749	256.432	265.289	182.705	262.39	164.042	275.387	157.27	187.362
YIL164C	NIT1	96.0671	375.231	252.73	212.364	186.964	259.423	224.046	315.763	197.38	156.917
YIL165C	YIL165C	92.0416	344.85	354.665	210.9	255.616	255.671	212.724	335.054	235.673	163.878
YIR017C	MET28	148.347	654.941	363.401	544.067	319.446	671.58	245.88	666.034	389.21	313.418
YIR034C	LYS1	116.574	778.555	560.034	510.004	538.115	695.389	483.712	991.459	639.291	437.112
YJL052W	TDH1	221.668	470.388	562.464	266.321	202.263	229.03	209.55	167.176	121.032	181.975
YJL060W	BNA3	102.618	267.529	155.49	170.012	146.67	250.45	181.863	299.839	203.841	164.46
YJL071W	ARG2	82.9518	207.251	162.811	176.964	199.911	243.776	181.263	252.606	194.864	209.852
YJL088W	ARG3	99.4966	2434.74	697.991	2249.58	2786.71	1037.82	2238.45	2638.59	3249.43	1722.92
YJL161W	FMP33	166.028	293.358	192.098	211.33	143.073	215.47	207.783	206.235	153.937	155.397
YJL170C	ASG7	144.236	352.343	171.031	195.081	162.664	95.9126	206.22	153.195	144.578	157.061
YJL200C	ACO2	132.22	344.118	176.474	182.666	237.363	248.7	242.3	317.816	285.616	204.561
YJL213W	YJL213W	63.6231	628.052	735.71	173.787	233.43	230.54	244.469	374.374	252.689	162.121
YJR035W	RAD26	70.4852	182.918	141.331	131.241	166.653	164.652	173.308	183.539	145.206	156.135
YJR109C	CPA2	155.166	2210.66	1723.47	2228.21	2204.29	1646.77	2033.95	2279.44	2372.19	1901.76
YJR111C	YJR111C	134.285	454.745	323.282	312.693	449.512	420.306	307.063	462.656	293.815	251.54
YJR130C	STR2	114.016	456.449	334.853	317.349	365.184	543.377	310.837	563.693	372.554	302.652
YJR148W	BAT2	111.758	235.431	285.618	187.233	176.857	143.163	137.092	246.274	131.058	103.136
YJR153W	PGU1	69.994	154.022	106.306	138.349	135.744	112.971	149.263	176.269	151.863	95.3588
YJR154W	YJR154W	80.7414	198.835	183.556	158.628	183.305	222.825	180.669	231.406	208.876	137.31
YJR155W	AAD10	77.4861	172.666	242.148	187.334	239.472	210.332	168.527	206.04	179.413	158.772
YKL033W-A	YKL033W-A	145.814	364.009	306.576	382.823	289.338	365.168	319.656	389.066	383.504	251.023
YKL035W	UGP1	512.127	1096.55	638.973	673.661	402.709	253.081	434.733	465.299	285.464	223.144
YKL103C	LAP4	127.965	303.03	202.893	348.242	160.96	200.96	153.199	317.824	175.395	155.002
YKL128C	PMU1	184.799	332.132	331.426	307.63	196.58	284.966	221.018	311.514	201.197	188.494
YKL211C	TRP3	157.531	612.46	674.892	687.294	621.876	659.231	510.068	793.432	685.915	515.032
YKL218C	SRY1	65.2767	371.949	407.78	230.73	185.581	262.515	170.255	309.17	191.906	157.76
YLL027W	ISA1	211.316	435.561	357.323	492.109	302.946	369.909	287.563	390.264	386.217	318.253
YLL028W	TPO1	247.254	492.306	485.1	215.398	399.103	176.001	424.29	209.398	126.119	168.655
YLL048C	YBT1	145.297	319.62	170.855	215.873	252.825	260.035	200.481	288.57	219.344	219.725
YLR027C	AAT2	317.676	717.869	546.596	835.151	470.316	626.772	488.4	697.226	553.495	574.675
YLR058C	SHM2	396.892	943.221	387.675	248.475	484.383	373.725	356.612	671.661	327.394	217.905
YLR089C	ALT1	129.157	289.943	279.788	196.534	166.878	140.956	168.497	208.101	200.723	119.487
YLR120C	YPS1	209.071	458.354	776.644	411.682	240.721	290.973	315.765	330.982	252.242	330.271
YLR152C	YLR152C	107.434	387.194	226.689	158.843	267.375	133.91	186.179	276.829	163.721	158.344
YLR178C	TFS1	260.947	566.801	338.164	420.579	172.328	214.519	218.631	425.936	175.624	153.819
YLR211C	YLR211C	77.4588	121.287	83.5705	90.1209	152.262	121.853	146.905	128.727	125.125	97.7553
YLR258W	GSY2	246.216	494.76	417.855	311.795	287.466	152.521	371.885	321.898	223.792	183.313
YLR267W	BOP2	112.935	188.665	359.193	127.175	323.959	127.241	285.079	195.999	346.653	375.483
YLR290C	YLR290C	95.6073	177.827	92.1789	141.248	126.693	175.361	124.706	184.94	147.063	145.741
YLR304C	ACO1	312.709	737.45	807.863	608.82	560.79	291.296	533.043	591.337	589.041	601.735
YLR327C	TMA10	195.315	348.58	346.819	171.446	196.214	214.778	340.871	197.64	147.308	433.658
YLR452C	SST2	342.044	871.872	244.433	137.302	214.852	117.97	141.561	265.456	99.9731	112.749
YML116W	ATR1	119.948	247.844	231.281	224.782	232.001	419.594	233.726	320.128	221.588	187.677
YMR062C	ECM40	119.85	1460.9	880.664	929.73	1094.07	805.248	1049.56	1328.05	1125.08	945.438
YMR096W	SNZ1	83.7655	665.277	456.686	209.722	711.525	488.481	471.904	717.974	343.555	208.685
YMR120C	ADE17	132.166	361.653	197.411	159.203	149.912	156.359	155.36	262.392	125.401	87.7282
YMR173W	DDR48	212.734	714.293	522.234	523.032	627.238	480.012	397.062	601.898	371.521	208.502
YMR189W	GCV2	162.369	505.127	200.092	149.83	206.157	117.422	189.307	245.557	162.196	102.973
YMR232W	FUS2	75.1148	140.276	59.5542	73.8419	102.193	58.0858	106.062	100.73	88.49	68.3023
YMR250W	GAD1	175.775	365.833	239.061	228.933	162.6	95.0311	180.053	216.493	140.909	140.415
YMR251W-A	HOR7	1238.74	3706.44	3494.71	2556.01	2637.25	1651.05	2918.11	2307.29	1703.49	1346.65
YMR316W	DIA1	103.89	314.07	761.752	255.347	188.532	178.577	193.952	224.791	207.323	246.528
YNL036W	NCE103	377.735	1477.28	1566.14	1771.37	1165.07	1385.89	2396.84	1372.62	836.405	631.674
YNL037C	IDH1	212.369	436.37	456.302	483.004	241.204	253.378	233.478	435.566	331.046	237.787
YNL104C	LEU4	220.385	1031.6	1017.96	1637.87	1372.71	1500.73	1400.46	1509.28	1596.46	1500.66
YNL125C	ESBP6	110.746	315.25	189.064	247.271	274.174	202.862	199.123	234.639	210.497	166.527
YNL220W	ADE12	156.564	364.241	251.933	236.71	210.84	312.327	208.538	319.935	246.718	179.939
YNL279W	PRM1	103.124	235.178	206.654	159.52	124.337	187.727	155.257	182.356	145.126	155.863
YNL310C	ZIM17	147.069	425.361	420.404	421.474	255.596	312.804	289.918	358.568	249.331	184.066
YNL311C	SKP2	105.171	244.631	187.813	188.633	298.785	262.779	185.435	256.106	239.587	151.004
YNR034W	SOL1	111.666	224.083	154.465	215.741	179.7	228.33	201.768	272.03	212.876	160.636
YNR044W	AGA1	191.682	711.703	192.389	133.116	191.748	78.9055	126.022	156.093	117.683	95.7262
YNR056C	BIO5	72.5609	182.205	193.687	133.287	192.266	188.635	148.63	212.278	154.851	160.164
YNR057C	BIO4	95.5305	214.626	207.851	242.607	234.415	250.185	151.013	246.822	331.547	201.791
YNR058W	BIO3	63.5112	150.503	140.64	168.05	141.749	172.66	175.876	192.062	170.563	129.889
YNR069C	BSC5	82.0499	296.644	308.347	132.35	108.577	295.072	135.977	276.916	92.6755	172.547
YOL016C	CMK2	122.088	308.744	778.015	269.951	226.786	236.842	321.985	276.565	269.958	255.341
YOL047C	YOL047C	68.6498	152.868	118.145	149.855	92.2829	115.51	138.423	162.186	127.298	113.593
YOL052C-A	DDR2	401.046	1014.43	408.729	303.43	290.433	159.13	307.954	134.645	124.049	135.71
YOL058W	ARG1	153.415	3105.72	1943.18	4700.89	4260.58	2136.1	3204.35	3592.54	3993.71	2573.06
YOL064C	MET22	115.672	384.688	285.058	326.623	400.21	387.995	313.707	495.602	338.274	246.506
YOL084W	PHM7	116.444	310.232	174.549	181.056	217.545	49.3056	156.523	84.613	68.4663	76.4395
YOL091W	SPO21	73.2745	159.99	104.355	110.556	176.473	165.822	133.533	169.26	124.072	82.0764
YOL119C	MCH4	77.0604	748.136	504.927	414.53	516.249	476.445	345.549	790.102	363.726	230.571
YOL140W	ARG8	171.735	531.696	251.97	513.715	751.989	558.008	496.43	717.163	775.362	441.936
YOR044W	YOR044W	167.152	420.006	286.432	379.982	315.107	391.563	331.169	398.63	344.752	300.294
YOR100C	CRC1	41.6755	145.519	158.935	122.986	143.737	85.6341	127.353	129.499	103.903	103.079
YOR130C	ORT1	112.845	418.835	322.889	317.144	250.213	309.93	265.022	368.637	301.08	270.876
YOR136W	IDH2	229.373	555.901	442.259	439.381	401.378	239.583	306.62	502.387	330.912	269.656
YOR173W	DCS2	140.358	276.079	162.407	242.68	145.8	101.726	154.927	226.669	123.27	107.607
YOR184W	SER1	191.926	526.395	493.031	448.02	613.15	570.791	338.435	629.062	600.809	432.102
YOR220W	WSP1	129.001	337.43	378.523	283.298	148.094	175.805	178.745	185.972	177.269	239.24
YOR221C	MCT1	99.6988	340.569	218.823	228.9	249.989	277.715	217.561	276.53	284.474	196.05
YOR222W	ODC2	418.565	911.15	729.486	862.047	603.998	766.533	578.089	1011.43	704.146	477.943
YOR230W	WTM1	223.291	466.958	465.31	347.312	267.007	240.078	261.51	476.515	196.624	143.859
YOR303W	CPA1	273.916	1786.08	1257.83	2464.99	2715.23	1608.21	2570.74	2463.81	2765.52	2198.27
YOR337W	TEA1	93.4836	247.916	252.168	196.48	200.893	214.959	150.496	246.037	189.325	152.391
YPL092W	SSU1	134.246	320.521	290.991	265.512	277.754	647.376	246.465	414.379	193.954	216.451
YPL135W	ISU1	444.341	1373.97	1309.81	1607.06	1081.62	1407.08	1494.08	1455.2	1030.58	728.161
YPL188W	POS5	110.196	246.856	156.69	162.629	172.368	306.137	211.897	264.536	234.661	225.59
YPL250C	ICY2	361.354	3112.75	4144.48	5150.56	2893.35	3268.38	3504.03	3737.33	3748.78	3690.72
YPL264C	YPL264C	121.269	454.986	346.299	351.868	345.294	418.628	235.135	564.96	318.499	166.785
YPL269W	KAR9	123.577	220.6	169.228	121.855	215.204	128.927	169.062	202.25	161.379	136.506
YPL273W	SAM4	191.435	481.66	368.615	377.928	425.611	412.842	315.126	479.609	375.664	234.862
YPR036W-A	YPR036W-A	1686.25	6630.69	6790.68	7668.41	5094.27	3906.17	5199.05	4900.14	5704.35	5178.18
YPR145W	ASN1	281.006	1560.1	2443.85	1779.22	2371.41	1916.84	1830.78	1596.51	1586.53	1847.22

## Sheet: 4744genes_Rpb3 avg
Rpb3 Occ. averaged over CDS for 4744 weakly induced or non-induced genes
Systematic name	Common name	WT-U	WT-I	ydj1∆-I	snf2∆-I	gcn5∆-I	snf2∆ydj1∆/lcGCN4-I	gcn5∆ydj1∆-I	Ptet-SNF2-I	Ptet-SNF2gcn5∆-I	Ptet-SNF2gcn5∆ydj1∆/lcGCN4-I
YAL001C	TFC3	123.285	124.752	124.096	116.761	134.952	141.97	144.593	153.421	134.36	144.732
YAL002W	VPS8	124.008	119.577	104.878	125.328	167.741	122.276	152.204	145.664	140.624	134.994
YAL003W	EFB1	1162.97	516.365	487.529	351.855	401.368	396.539	353.839	280.71	332.396	371.782
YAL005C	SSA1	807.531	419.557	1483.49	453.53	391.232	700.93	923.806	259.139	381.074	863.823
YAL007C	ERP2	180.639	170.163	144.069	142.078	144.847	166.419	162.252	158.562	190.364	140.097
YAL008W	FUN14	162.675	187.927	185.713	171.383	128.922	128.493	158.071	154.209	145.822	121.065
YAL009W	SPO7	102.349	119.119	101.335	112.51	110.091	76.5068	94.7981	111.526	128.074	159.705
YAL010C	MDM10	106.475	106.957	101.194	110.851	123.655	88.3348	130.783	134.25	147.163	94.1005
YAL011W	SWC3	120.686	119.311	136.988	124.855	116.961	136.436	122.927	138.202	167.32	122.67
YAL012W	CYS3	266.966	243.058	179.053	220.518	187.717	248.279	161.897	289.499	212.948	175.403
YAL013W	DEP1	102.59	119.55	168.197	201.375	132.42	161.188	156.038	178.631	136.048	145.639
YAL015C	NTG1	118.693	156.272	158.048	203.4	117.844	166.478	147.981	180.039	118.416	220.754
YAL016W	TPD3	204.89	198.78	202.398	232.331	184.954	201.02	208.38	226.717	251.303	264.284
YAL017W	PSK1	123.306	168.002	164.717	167.034	172.372	139.114	182.148	174.561	185.723	159.23
YAL018C	YAL018C	35.8763	44.6773	93.9079	70.4191	57.5161	32.0634	78.9246	61.9852	61.6439	46.8837
YAL019W	FUN30	104.785	91.0124	93.1522	120.626	131.103	145.119	112.574	116.649	146.915	132.753
YAL020C	ATS1	81.5538	72.4231	94.9545	144.449	125.684	94.9867	65.6748	70.6265	87.8382	93.6173
YAL021C	CCR4	142.173	120.487	163.538	181.453	136.509	125.059	157.34	150.543	131.13	120.295
YAL022C	FUN26	108.104	110.97	163.734	158.036	117.131	173.748	125.175	143.895	129.768	186.239
YAL023C	PMT2	245.837	121.033	179.838	185.016	125.12	142.983	159.22	162.057	170.899	141.812
YAL024C	LTE1	99.798	67.5701	72.4449	83.5431	103.664	76.7853	118.456	93.3271	114.529	98.569
YAL025C	MAK16	175.113	85.6214	72.0145	115.402	126.248	108.288	82.7296	102.731	105.383	91.6992
YAL026C	DRS2	98.5065	146.023	126.963	116.954	169.139	184.521	149.298	156.988	132.426	120.268
YAL027W	YAL027W	110.963	146.741	126.612	127.819	126.009	141.725	90.6839	131.419	128.057	111.194
YAL029C	MYO4	144.318	117.962	112.192	124.88	126.188	122.161	137.604	123.689	135.246	127.352
YAL030W	SNC1	192.931	212.386	227.64	212.027	255.138	146.993	191.521	169.218	194.4	205.808
YAL031C	GIP4	110.672	140.114	125.326	140.358	136.438	117.332	128.327	125.257	158.964	115.131
YAL032C	PRP45	139.613	139.461	153.109	210.075	173.647	130.691	143.48	163.796	175.227	176.103
YAL033W	POP5	156.677	118.08	129.184	133.255	121.017	150.101	161.154	115.795	177.921	101.816
YAL034C	FUN19	149.636	209.485	163.791	244.854	151.163	164.527	192.555	176.436	161.725	177.752
YAL034W-A	MTW1	142.672	134.816	122.557	134.21	112.31	119.382	139.703	125.606	117.645	92.0347
YAL035W	FUN12	237.707	149.989	159.104	184.596	194.505	208.34	146.795	140.762	175.138	164.953
YAL036C	RBG1	149.514	95.6001	99.396	130.998	109.5	156.583	107.619	133.343	180.692	118.676
YAL038W	CDC19	1737.61	1117.18	1044.35	712.357	987.987	916.487	791.161	1194.79	825.778	1099.23
YAL039C	CYC3	157.462	147.296	245.9	430.194	119.724	262.396	189.451	160.248	223.822	226.073
YAL040C	CLN3	451.957	299	338.958	368.441	227.622	253.282	321.27	165.744	157.71	190.891
YAL041W	CDC24	203.698	183.218	173.368	193.173	187.173	188.316	180.922	171.056	173.898	186.512
YAL042W	ERV46	178.487	148.434	167.987	248.263	121.406	174.427	174.452	167.923	227.712	136.261
YAL043C	PTA1	133.826	138.568	145.279	193.944	163.317	176.023	152.696	177.845	170.404	155.34
YAL046C	YAL046C	119.795	134.487	195.836	153.714	136.834	214.936	160.025	158.005	158.995	173.755
YAL047C	SPC72	70.4178	96.1004	81.9113	106.26	132.981	128.595	114.465	101.202	126.412	116.907
YAL051W	OAF1	105.395	104.083	97.4765	102.037	118.14	101.394	144.513	124.661	122.205	140.259
YAL053W	FLC2	129.689	138.615	144.231	199.054	155.919	134.373	149.811	176.396	160.418	180.259
YAL054C	ACS1	74.6218	76.5297	98.0018	111.7	85.2897	101.593	109.152	95.2798	137.998	123.677
YAL055W	PEX22	126.163	109.212	118.687	138.628	120.746	141.156	134.764	135.848	104.477	110.534
YAL056W	GPB2	127.662	120.285	143.999	138.352	142.871	133.372	147.949	130.29	181.524	256.257
YAL058W	CNE1	69.5488	72.5966	92.0118	84.4154	80.8909	84.2147	99.7806	76.7216	84.9033	85.4143
YAL059W	ECM1	158.2	119.534	95.6154	104.084	147.921	115.352	93.784	127.434	127.505	110.961
YAL060W	BDH1	261.435	338.753	296.29	256.874	177.336	195.745	216.937	296.362	177.935	199.831
YAL062W	GDH3	130.438	149.34	167.345	206.092	222.153	142.59	138.528	176.719	139.143	128.213
YAL063C	FLO9	50.4427	46.5248	72.8258	86.6051	53.2031	68.1953	71.3055	73.4239	77.5271	69.2158
YAL063C-A	YAL063C-A	32.1409	34.101	66.1079	37.286	54.139	33.2588	53.3064	49.4407	59.622	79.6925
YAL064C-A	YAL064C-A	78.6008	77.8599	86.8982	135.194	185.611	74.7796	157.516	133.232	94.2106	91.4161
YAL064W	YAL064W	35.905	38.7563	67.0531	43.8669	47.8709	76.9619	81.3081	57.8496	63.56	128.697
YAL065C	YAL065C	75.2294	89.8763	105.706	97.3044	102.834	122.379	120.682	88.6228	98.7478	106.57
YAL067W-A	YAL067W-A	34.1686	29.7145	24.0439	35.0378	38.0108	49.3211	122.886	54.2692	94.7274	42.9495
YAL068C	PAU8	24.177	28.6977	53.1712	45.4048	76.8245	26.203	45.2084	45.8927	53.4016	25.63
YAR002C-A	ERP1	198.245	142.867	174.967	146.147	144.333	159.022	157.873	132.901	132.267	155.188
YAR002W	NUP60	199.616	158.259	153.913	141.129	135.211	193.24	149.026	128.184	135.676	203.915
YAR003W	SWD1	135.862	110.807	109.373	134.129	125.838	111.967	185.374	125.238	131.885	147.926
YAR007C	RFA1	151.577	80.485	106.23	86.6806	101.301	122.729	142.498	94.7353	122.227	124.354
YAR008W	SEN34	108.72	46.5891	66.6606	73.0473	96.9531	77.2954	99.3151	98.6091	99.9586	96.5616
YAR014C	BUD14	137.875	118.295	99.8682	153.665	128.915	165.131	137.8	179.615	155.552	128.249
YAR015W	ADE1	141.383	159.051	138.278	175.964	181.333	176.804	224.569	198.408	183.442	137.103
YAR018C	KIN3	120.665	112.899	103.283	112.07	132.252	121.071	126.854	127.984	145.344	149.883
YAR019C	CDC15	86.5802	85.7536	85.2827	113.213	93.5062	94.4305	104.265	103.642	113.341	100.301
YAR023C	YAR023C	96.9064	122.073	114.418	140.38	88.7832	132.983	133.938	129.606	85.6387	123.823
YAR028W	YAR028W	87.3214	106.924	148.402	127.95	124.735	106.874	163.683	155.819	122.197	121.019
YAR029W	YAR029W	78.5572	86.0165	83.7201	125.108	114.006	114.602	118.61	118.532	111.396	109.036
YAR031W	PRM9	98.3089	110.639	149.56	150.916	176.164	135.91	119.869	128.315	111.631	135.226
YAR033W	MST28	105.685	92.2014	104.26	118.882	80.0732	105.202	137.855	104.397	159.339	138.808
YAR035W	YAT1	28.4363	37.9662	100.442	112.74	134.82	110.865	133.29	87.5587	159.614	378.345
YAR042W	SWH1	125.101	99.8198	112.496	158.259	115.639	142.581	152.375	106.986	129.387	143.077
YAR050W	FLO1	58.9926	59.0138	96.7132	115.651	82.1594	96.7433	87.3376	89.1549	99.3742	99.8217
YBL001C	ECM15	701.621	750.087	819.675	591.959	750.58	539.016	618.016	583.668	572.612	253.121
YBL002W	HTB2	1218.08	1052.68	1080.37	842.571	996.448	709.964	990.349	819.141	696.319	501.227
YBL003C	HTA2	1395.79	1209.6	1141.83	999.799	857.054	693.922	1135.37	700.84	680.476	489.121
YBL004W	UTP20	162.32	83.7226	77.7536	88.5794	150.518	110.061	120.927	95.6094	138.96	131.666
YBL005W	PDR3	188.017	243.906	248.356	137.313	195.577	155.548	165.882	205.528	157.362	134.152
YBL006C	LDB7	187.876	153.795	220.316	223.21	171.707	134.185	142.141	169.672	152.223	149.466
YBL007C	SLA1	184.55	187.894	231.53	268.803	195.858	173.005	233.168	197.365	212.548	192.927
YBL008W	HIR1	73.2658	61.9367	72.5816	85.0737	78.6602	78.3632	97.9103	100.137	100.579	87.9992
YBL009W	YBL009W	127.772	67.0986	76.595	77.0518	97.3888	109.397	117.523	98.557	114.014	112.836
YBL010C	YBL010C	141.482	102.088	99.3989	149.741	129.135	79.6573	140.33	116.904	110.789	91.5548
YBL011W	SCT1	183.066	130.199	154.388	188.99	188.21	164.872	167.832	156.261	177.253	176.45
YBL013W	FMT1	96.5949	78.9023	106.492	123.743	82.4428	83.6696	99.5774	85.1346	97.7631	96.1624
YBL014C	RRN6	124.954	87.125	99.4342	105.425	117.078	128.939	121.523	96.7137	120.67	143.684
YBL015W	ACH1	82.3265	89.9265	174.718	186.426	119.602	123.829	175.625	113.068	172.435	122.299
YBL016W	FUS3	160.525	190.866	142.938	185.525	106.545	134.286	130.71	133.019	118.773	94.4657
YBL017C	PEP1	184.402	184.863	218.126	180.99	172.092	157.576	166.87	192.495	158.251	153.186
YBL018C	POP8	164.224	155.082	185.453	150.928	303.481	222.299	257.29	188.131	288.549	185.266
YBL019W	APN2	108.792	104.188	109.624	119.427	149.182	108.424	149.732	131.157	177.333	121.462
YBL020W	RFT1	106.81	78.479	95.7545	104.021	110.358	92.1716	104.521	84.3739	104.752	102.927
YBL021C	HAP3	108.18	90.4402	128.835	140.982	79.7724	135.755	166.166	100.868	129.823	122.958
YBL022C	PIM1	165.399	122.992	151.209	142.33	164.827	150.899	152.405	144.348	145.394	151.53
YBL023C	MCM2	109.13	84.542	107.853	102.681	105.061	140.661	120.83	114.085	111.492	120.14
YBL024W	NCL1	192.034	135.546	125.968	130.944	160.221	137.843	131.109	144.14	181.002	141.695
YBL025W	RRN10	146.641	131.246	156.784	131.554	130.286	100.795	150.115	149.525	133.293	80.2393
YBL026W	LSM2	226.88	238.029	237.998	171.873	126.488	152.731	173.455	182.854	151.613	157.203
YBL027W	RPL19B	894.722	826.575	551.054	673.958	541.033	507.461	438.005	584.152	499.248	442.362
YBL028C	YBL028C	195.456	118.244	80.255	66.5984	90.6184	127.062	108.775	87.3202	108.997	76.8542
YBL029C-A	YBL029C-A	288.086	271.924	191.461	422.178	231.744	402.622	321.727	229.1	237.301	211.753
YBL029W	YBL029W	177.919	139.58	123.744	167.311	134.002	161.551	189.793	150.372	141.332	151.265
YBL030C	PET9	447.082	352.509	305.216	475.379	265.957	345.263	350.851	292.538	390.076	377.763
YBL031W	SHE1	190.697	129.881	153.951	141.496	167.353	147.558	131.44	154.528	154.021	134.908
YBL032W	HEK2	180.895	103.788	145.438	153.062	125.034	86.4283	116.851	146.6	98.93	166.732
YBL034C	STU1	101.459	78.6816	87.5534	90.0153	116.318	95.341	119.562	84.5775	107.12	87.61
YBL035C	POL12	143.515	77.6508	94.4687	86.4973	106.597	106.316	122.584	106.809	122.32	105.24
YBL036C	YBL036C	183.978	139.588	142.898	155.207	179.775	115.18	193.299	140.583	136.25	124.695
YBL037W	APL3	127.181	99.6951	109.177	108.894	161.418	120.42	126.244	131.256	131.837	130.997
YBL038W	MRPL16	200.554	168.061	175.753	175.603	180.962	187.497	188.908	172.749	187.903	301.764
YBL039C	URA7	216.965	72.1641	67.5636	117.524	151.219	119.528	102.116	90.6386	126.486	107.374
YBL040C	ERD2	245.754	213.75	168.227	217.476	168.92	226.152	186.722	264.563	203.306	187.955
YBL041W	PRE7	345.679	235.674	212.851	308.465	223.278	262.295	271.377	282.145	215.539	232.599
YBL042C	FUI1	237.52	135.805	102.016	238.944	154.869	176.466	148.23	151.504	186.935	209.236
YBL045C	COR1	214.159	189.752	184.781	251.807	162.185	204.241	282.173	205.457	178.551	207.704
YBL046W	PSY4	102.159	97.8456	110.664	137.912	109.988	108.412	130.018	103.419	138.639	227.434
YBL047C	EDE1	191.756	214.536	219.842	249.066	187.795	192.348	213.658	219.908	238.351	216.409
YBL049W	MOH1	102.623	109.87	150.327	134.925	105.174	124.081	124.799	129.187	131.034	132.647
YBL050W	SEC17	183.907	223.333	177.432	216.916	152.479	211.697	187.539	260.721	218.397	246.363
YBL051C	PIN4	174.498	154.323	142.961	156.401	177.702	171.826	197.047	173.495	173.977	168.136
YBL052C	SAS3	116.605	100.983	87.9288	91.4785	112.643	85.6049	128.061	94.3069	113.08	120.516
YBL054W	YBL054W	89.0568	53.6907	66.2944	91.2391	115.058	104.961	79.8976	56.7805	96.8449	105.961
YBL055C	YBL055C	167.064	148.092	166.357	161.574	179.056	139.584	194.17	158.661	175.84	174.056
YBL056W	PTC3	273.277	264.905	261.553	252.121	344.183	222.117	254.235	231.655	287.146	207.202
YBL057C	PTH2	180.576	184.243	215.76	222.473	177.894	213.832	226.935	182.185	193.301	182.551
YBL058W	SHP1	233.941	212.753	209.702	268.429	173.024	207.648	202.533	233.144	239.222	211.477
YBL059C-A	YBL059C-A	131.905	148.903	113.853	108.36	234.948	124.087	160.272	128.616	198.783	141.103
YBL059W	YBL059W	150.549	139.385	165.017	133.632	147.046	170.356	158.495	146.172	141.998	105.219
YBL060W	YBL060W	102.1	90.9629	99.129	91.6472	100.949	125.405	123.875	100.14	100.167	118.31
YBL061C	SKT5	140.942	129.659	112.14	117.848	118.71	111.188	124.658	136.626	137.305	216.613
YBL063W	KIP1	99.8295	57.1591	63.0043	64.9972	97.3105	71.7782	88.8145	69.5866	90.1087	86.3874
YBL064C	PRX1	148.034	202.584	211.3	235.615	155.964	140.653	174.379	242.248	184.487	163.747
YBL067C	UBP13	104.497	85.0011	103.052	92.1797	96.8792	118.306	98.4382	114.523	114.332	99.4318
YBL068W	PRS4	120.806	93.301	90.3285	100.589	170.373	162.965	98.6643	114.813	115.453	224.038
YBL069W	AST1	170.298	139.078	130.8	148.415	136.964	138.37	146.893	128.718	133.361	113.022
YBL071W-A	KTI11	208.1	129.398	97.9586	171.159	234.544	166.422	148.024	138.338	164.622	137.737
YBL072C	RPS8A	849.715	796.446	552.167	650.299	462.163	550.014	448.762	678.415	465.572	354.516
YBL074C	AAR2	124.876	137.867	119.823	141.947	112.424	113.111	101.941	137.479	144.106	101.98
YBL075C	SSA3	101.127	105.564	119.429	122.052	146.824	108.376	126.848	111.48	115.081	125.818
YBL076C	ILS1	328.83	466.379	394.585	481.124	501.798	534.878	392.288	483.38	495.666	403.183
YBL079W	NUP170	167.073	117.793	133.9	127.817	128.966	135.321	141.613	142.269	158.428	167.294
YBL080C	PET112	108.312	92.1634	97.6664	117.417	94.4521	117.835	127.92	112.407	110.586	166.897
YBL081W	YBL081W	165.781	97.4216	131.366	146.496	130.793	154.515	147.641	156.196	156.937	144.841
YBL082C	ALG3	75.8938	48.8208	81.4037	105.646	77.4603	85.5415	78.0422	100.555	74.0572	141.724
YBL084C	CDC27	126.952	120.427	113.426	140.223	133.117	129.529	157.21	127.429	158.98	167.197
YBL085W	BOI1	147.354	118.436	125.85	140.034	113.758	129.957	134.969	141.028	135.205	132.067
YBL086C	YBL086C	91.433	110.389	96.0482	149.957	144.501	109.988	134.926	154.355	197.558	121.203
YBL087C	RPL23A	569.074	461.953	326.283	350.635	300.945	296.82	217.081	366.381	265.144	268.616
YBL088C	TEL1	100.985	109.992	104.941	97.5375	101.036	101.643	113.637	128.056	107.861	97.893
YBL089W	AVT5	154.939	150.202	169.602	146.694	125.729	132.182	168.397	195.264	205.109	135.303
YBL090W	MRP21	164.134	168.31	126.339	148.689	125.331	158.502	152.816	140.233	175.793	119.204
YBL091C	MAP2	121.966	132.883	148.24	156.046	164.111	131.27	145.293	150.104	138.837	101.763
YBL091C-A	SCS22	450.868	446.648	420.792	470.428	327.811	257.027	242.182	380.033	312.591	260.654
YBL092W	RPL32	1052.51	1024.9	727.139	803.727	833.806	703.707	489.247	678.626	604.525	416.576
YBL093C	ROX3	168.244	184.839	184.852	186.063	151.936	109.48	154.197	212.345	207.609	170.688
YBL095W	YBL095W	227.496	213.649	216.495	243.395	155.592	173.955	262.954	204.028	283.49	175.336
YBL097W	BRN1	116.55	86.5365	100.274	87.1742	167.092	89.1676	137.361	116.096	109.169	135.067
YBL098W	BNA4	79.1223	110.814	110.491	99.7117	117.266	102.796	116.756	136.014	125.464	84.5778
YBL099W	ATP1	349.416	316.475	376.256	428.105	247.427	373.717	347.222	330.581	301.89	357.328
YBL104C	YBL104C	98.3873	99.9018	116.211	104.836	136.791	132.896	145.655	131.017	135.045	107.361
YBL105C	PKC1	143.866	130.882	142.305	153.194	138.387	139.094	162.296	154.414	165.09	147.612
YBL107C	YBL107C	151.034	108.94	153.895	103.879	158.962	123.436	165.762	103.904	132.306	125.931
YBR001C	NTH2	152.112	197.46	171.374	195.036	142.19	145.174	176.357	200.723	182.309	153.595
YBR002C	RER2	267.822	189.27	138.034	211.801	162.48	179.667	209.566	201.627	265.435	174.663
YBR003W	COQ1	158.926	191.561	160.69	202.42	141.893	160.663	179.484	189.599	162.474	194.232
YBR004C	GPI18	115.76	167.969	172.403	132.207	116.331	163.519	151.497	133.023	133.29	142.675
YBR006W	UGA2	147.292	180.448	191.24	153.822	112.705	150.393	144.602	162.392	148.384	138.936
YBR007C	DSF2	112.191	100.844	100.81	104.449	122.831	139.789	126.189	133.393	142.385	148.734
YBR008C	FLR1	140.479	90.3357	97.0433	114.325	100.577	135.977	120.431	131.364	140.937	93.6358
YBR011C	IPP1	366.838	368.086	334.04	363.625	327.029	346.39	359.61	387.856	362.934	366.339
YBR014C	YBR014C	139.162	136.425	100.782	101.715	112.491	109.812	103.091	146.967	107.941	74.1338
YBR015C	MNN2	177.042	124.902	120.397	157.605	180.518	168.924	173.171	129.729	185.573	172.059
YBR016W	YBR016W	212.492	281.872	347.396	346.915	154.636	173.916	202.412	205.671	239.718	197.14
YBR017C	KAP104	160.737	146.5	139.374	147.696	157.57	154.791	172.299	155.76	139.755	147.775
YBR019C	GAL10	83.6857	94.3072	106.36	109.757	106.919	103.508	116.97	122.356	107.399	96.5685
YBR020W	GAL1	121.971	98.8312	97.5102	134.158	130.041	89.328	116.811	129.299	116.666	95.6622
YBR021W	FUR4	129.072	91.6783	82.0408	115.159	101.273	130.797	131.105	101.227	101.7	100.705
YBR023C	CHS3	160.428	151.591	135.906	152.932	154.794	147.386	156.533	175.993	193.939	178.168
YBR024W	SCO2	143.013	126.938	109.553	123.402	137.659	122.644	174.383	139.577	134.448	122.135
YBR025C	YBR025C	391.93	229.832	256.991	260.011	242.067	294.099	214.68	212.667	226.738	211.008
YBR028C	YBR028C	131.937	166.365	106.806	142.312	140.226	213.351	110.049	181.658	143.502	101.816
YBR029C	CDS1	306.79	227.343	122.852	182.595	193.192	219.321	182.225	194.905	212.702	203.234
YBR030W	YBR030W	169.859	86.9815	97.6523	98.9089	129.749	103.386	96.8918	104.273	98.9844	99.8502
YBR031W	RPL4A	835.505	430.571	325.17	411.02	336.384	359.356	287.193	334.572	303.037	323.798
YBR033W	EDS1	94.6996	85.9101	131.659	118.179	140.122	107.027	142.113	123.003	135.669	128.201
YBR034C	HMT1	226.775	151.805	150.803	179.704	192.832	195.868	190.413	210.852	186.773	189.082
YBR036C	CSG2	210.536	237.776	278.403	307.254	294.407	294.684	228.174	260.416	262.083	233.678
YBR037C	SCO1	135.251	163.019	140.739	232.988	143.382	120.281	158.426	166.08	212.393	161.726
YBR038W	CHS2	155.789	98.9498	124.794	107.164	96.674	103.635	136.759	123.303	110.443	140.739
YBR039W	ATP3	214.046	181.343	147.573	203.354	204.581	180.969	212.253	152.817	172.365	190.769
YBR040W	FIG1	46.0148	48.9388	74.2353	48.5867	54.0626	24.6877	54.347	58.966	64.3963	51.392
YBR041W	FAT1	134.081	151.051	139.637	132.874	114.301	119.67	136.161	128.38	145.661	121.064
YBR042C	YBR042C	129.106	119.771	112.867	115.937	121.476	118.997	148.029	103.371	119.328	106.723
YBR043C	QDR3	141.543	188.792	174.164	178.59	183.362	222.395	222.222	188.184	207.493	172.281
YBR048W	RPS11B	622.22	531.95	378.144	409.183	331.309	286.242	280.742	404.454	301.019	353.243
YBR049C	REB1	178.546	117.698	142.342	145.613	174.506	171.575	157.066	146.098	165.381	169.751
YBR050C	REG2	105.227	105.07	127.744	137.867	127.57	147.142	138.581	146.613	152.581	157.673
YBR052C	RFS1	180.937	232.192	201.871	242.368	145.707	177.83	179.743	185.095	193.392	129.508
YBR054W	YRO2	315.138	240.868	339.919	134.049	228.705	157.936	313.085	81.1126	98.1507	115.652
YBR055C	PRP6	121.686	117.678	118.281	94.8049	123.451	117.123	130.402	111.92	121.182	105.021
YBR057C	MUM2	158.598	165.373	156.14	149.416	142.575	144.542	158.571	184.264	161.828	98.4306
YBR058C	UBP14	108.557	107.11	98.1124	111.413	165.616	134.382	125.655	121.463	128.347	146.27
YBR058C-A	TSC3	180.522	223.666	180.71	197.038	204.112	254.3	249.329	230.045	215.223	235.278
YBR059C	AKL1	147.452	189.17	176.723	226.568	211.002	189.966	207.468	201.74	209.554	185.762
YBR060C	ORC2	140.139	121.047	97.0156	120.139	130.704	112.069	111.288	121.328	120.853	129.208
YBR061C	TRM7	130.535	90.1537	85.1183	109.389	110.08	113.14	131.385	101.421	127.768	124.208
YBR062C	YBR062C	195.085	149.018	159.86	169.225	153.788	156.041	160.76	140.282	211.353	208.869
YBR063C	YBR063C	105.726	127.604	99.5612	98.3225	144.788	110.474	131.024	129.346	133.688	174.482
YBR065C	ECM2	99.3103	127.705	119.508	121.319	134.39	109.902	161.799	120.068	186.604	103.827
YBR066C	NRG2	244.31	288.565	233.998	341.077	184.508	306.901	212.315	221.775	224.037	232.985
YBR068C	BAP2	805.267	1090.03	980.435	2144.55	1900.35	1389.58	1680.94	964.306	1581.69	1380.43
YBR069C	TAT1	359.381	145.492	231.741	474.487	287.779	397.652	177.873	183.839	205.395	203.817
YBR070C	ALG14	189.137	83.475	114.839	152.92	97.4725	142.497	112.511	100.201	102.183	123.157
YBR071W	YBR071W	307.707	228.46	516.108	328.266	143.271	313.286	209.065	228.038	130.516	149.909
YBR073W	RDH54	141.573	88.992	101.516	96.8368	118.365	129.744	97.6752	108.136	106.689	112.633
YBR076W	ECM8	117.081	144.055	141.557	147.197	128.45	120.57	184.143	148.988	145.003	134.968
YBR077C	SLM4	357.452	321.915	313.691	345.21	307.693	379.57	334.716	308.074	303.37	425.66
YBR078W	ECM33	990.28	501.748	545.639	483.733	541.348	390.101	405.002	397.579	364.683	307.801
YBR079C	RPG1	311.669	206.546	207.932	223.169	199.378	201.956	202.333	180.055	218.926	214.562
YBR080C	SEC18	135.706	141.343	135.983	155.941	153.885	147.797	164.902	153.722	187.617	167.586
YBR081C	SPT7	104.504	108.063	101.447	105.718	129.953	121.62	130.62	115.896	142.075	127.473
YBR082C	UBC4	426.928	281.161	413.786	336.881	185.558	399.138	331.911	289.891	256.956	288.672
YBR083W	TEC1	418.127	413.468	221.873	195.042	188.934	168.781	131.648	183.77	125.168	152.289
YBR084C-A	RPL19A	817.816	643.057	448.996	565.176	432.28	454.991	378.282	519.76	408.374	371.668
YBR084W	MIS1	148.758	81.6216	84.1285	102.206	135.651	84.5398	115.645	94.8778	135.696	144.911
YBR086C	IST2	271.071	243.409	254.923	250.546	162.583	184.937	229.852	179.39	172.012	193.418
YBR087W	RFC5	186.696	110.483	114.206	94.7552	97.8175	122.103	124.891	124.027	87.907	159.198
YBR088C	POL30	286.056	133.727	137.213	114.054	165.162	116.909	151.579	143.887	164.441	195.427
YBR089C-A	NHP6B	333.956	215.493	213.132	269.072	223.031	222.747	289.56	246.984	209.365	252.077
YBR090C	YBR090C	264.337	164.771	157.162	245.822	155.785	168.851	210.369	201.515	191.412	190.133
YBR091C	MRS5	248.383	181.775	152.288	243.95	145.103	133.7	178.303	179.341	129.436	166.824
YBR092C	PHO3	339.811	108.432	118.289	151.705	120.62	118.485	146.264	104.337	172.851	175.716
YBR093C	PHO5	229.669	183.323	161.828	124.36	139.195	95.0843	150.241	125.435	136.455	143.181
YBR094W	YBR094W	107.942	76.9049	75.6405	74.1415	108.764	78.8168	141.392	81.4485	105.254	102.451
YBR095C	RXT2	135.554	110.585	112.691	106.66	124.81	132.024	151.85	106.699	116.673	143.718
YBR096W	YBR096W	179.899	192.221	154.88	155.418	128.768	119.677	211.485	166.781	197.066	166.048
YBR097W	VPS15	98.128	95.1026	85.746	85.4192	114.037	71.7518	119.81	103.079	96.9139	113.8
YBR098W	MMS4	116.547	92.4669	112.233	97.5759	106.177	103.73	124.231	107.651	102.023	131.347
YBR101C	FES1	304.253	171.65	300.034	202.558	175.271	366.91	290.086	171.449	239.68	311.541
YBR102C	EXO84	104.409	99.7895	101.539	99.4719	117.354	131.438	164.053	138.461	122	111.908
YBR103W	SIF2	114.473	111.851	123.256	138.942	157.513	143.398	164.546	141.831	122.272	140.611
YBR106W	PHO88	436.391	219.015	323.774	296.741	250.918	342.492	284.304	284.18	206.758	227.629
YBR107C	IML3	142.198	121.9	116.309	164.821	157.457	231.337	120.348	162.871	127.877	82.5765
YBR108W	YBR108W	80.2073	95.3343	113.027	138.297	97.9155	95.6635	123.915	115.275	118.517	103.734
YBR109C	CMD1	251.155	247.669	225.235	309.585	237.854	248.771	259.121	211.888	294.121	246.101
YBR110W	ALG1	110.649	138.539	152.366	120.698	182.619	121.559	155.094	139.745	157.247	136.924
YBR111C	YSA1	150.935	190.193	166.717	217.214	135.687	183.039	171.499	187.746	167.013	118.964
YBR111W-A	SUS1	202.834	220.943	153.936	181.167	199.336	179.509	184.189	219.937	210.486	174.278
YBR112C	CYC8	217.163	182.263	242.414	292.152	195.945	243.44	239.742	247.365	215.451	256.2
YBR117C	TKL2	111.087	125.82	114.438	136.166	118.977	97.3746	125.758	136.479	158.536	155.063
YBR118W	TEF2	1661.67	1172.22	1164.88	1246.44	1211.03	1033.76	1178.89	1100.16	1142.67	1278.37
YBR120C	CBP6	211.28	200.856	148.431	164.699	127.672	168.257	147.447	194.517	128.256	288.137
YBR121C	GRS1	250.728	183.32	165.034	170.878	203.024	183.145	185.814	183.223	201.21	174.915
YBR122C	MRPL36	248.466	235.033	253.897	207.042	197.397	180.533	225.906	239.652	224.529	255.819
YBR123C	TFC1	111.289	86.462	95.6109	90.6374	99.4793	100.703	142.981	101.527	122.094	118.507
YBR125C	PTC4	123.077	97.1603	102.717	123.168	92.7731	93.6212	140.339	110.635	104.275	118.455
YBR127C	VMA2	285.723	299.93	264.457	332.625	252.532	318.059	239.177	309.982	307.334	231.531
YBR128C	ATG14	177.014	206.088	173.636	206.011	178.481	169.218	201.659	183.086	186.514	141.704
YBR129C	OPY1	129.606	131.233	130.823	138.456	143.839	143.863	134.686	137.575	159.544	161.66
YBR130C	SHE3	192.599	160.546	159.882	131.205	131.277	159.489	151.948	166.622	152.855	165.935
YBR131W	CCZ1	87.2457	114.919	108.258	117.982	112.355	129.509	102.766	134.523	134.676	91.9665
YBR133C	HSL7	209.136	164.138	172.942	155.894	143.215	165.026	150.293	170.002	149.16	136.347
YBR135W	CKS1	164.931	122.412	136.904	167.616	90.2069	142.513	149.867	166.039	160.308	133.193
YBR136W	MEC1	71.0617	72.6285	74.8587	75.2321	107.868	85.4192	112.727	88.2883	102.654	123.57
YBR137W	YBR137W	148.498	180.138	181.459	148.356	140.852	150.764	197.732	136.546	190.303	100.67
YBR138C	YBR138C	102.184	101.152	109.732	80.8645	156.785	94.1565	125.292	117.153	122.783	89.9512
YBR139W	YBR139W	177.315	236.217	216.605	225.938	156.88	181.982	208.498	243.768	175.199	138.405
YBR140C	IRA1	129.008	137.632	127.622	138.456	185.81	121.46	157.96	149.188	158.721	154.449
YBR141C	YBR141C	141.981	95.9557	101.372	107.406	110.035	123.641	110.259	95.1103	105.157	96.6623
YBR142W	MAK5	109.984	70.9989	67.9902	72.8896	180.631	79.1944	104.129	77.4586	129.137	81.6213
YBR143C	SUP45	323.625	248.465	168.122	216.11	219.706	206.399	185.261	234.531	244.09	189.949
YBR150C	TBS1	120.116	151.825	138.739	142.894	151.722	127.289	156.193	180.662	152.294	178.798
YBR151W	APD1	160.156	199.092	130.983	174.369	118.98	149.157	189.596	197.127	143.318	204.363
YBR152W	SPP381	110.242	125.139	117.031	119.353	89.7162	96.6264	139.801	155.48	88.3362	71.8692
YBR153W	RIB7	195.663	243.428	163.922	196.915	169.246	197.765	145.458	187.359	231.469	134.869
YBR154C	RPB5	308.07	304.602	152.061	191.938	228.682	207.947	264.5	218.889	192.447	186.808
YBR155W	CNS1	109.714	78.985	101.723	88.9006	87.0386	91.8313	111.886	101.265	103.276	87.6638
YBR156C	SLI15	97.6086	88.927	83.2783	69.7819	87.5813	83.3363	97.657	90.0175	91.0306	90.2146
YBR158W	AMN1	612.012	723.703	503.436	292.867	458.419	174.496	420.806	523.206	290.956	229.563
YBR159W	IFA38	182.872	168.888	148.001	146.985	159.212	123.287	163.645	159.853	170.009	184.414
YBR160W	CDC28	194.968	152.572	131.493	172.521	128.444	122.067	143.933	159.865	125.98	100.537
YBR161W	CSH1	195.122	203.759	181.242	239.049	150.586	163.963	140.498	169.067	162.828	130.46
YBR162C	TOS1	423.689	514.638	587.381	654.539	371.53	537.392	394.402	477.39	412.953	381.924
YBR162W-A	YSY6	407.771	520.557	452.729	447.523	437.176	449.079	465.511	418.542	482.573	302.934
YBR163W	DEM1	141.028	146.27	137.589	162.092	160.688	149.16	173.39	167.588	175.175	155.595
YBR164C	ARL1	152.383	178.968	128.905	154.827	145.341	165.726	156.749	257.76	120.533	146.355
YBR170C	NPL4	149.136	145.27	128.758	164.726	123.067	190.262	152.174	155.599	160.054	133.727
YBR171W	SEC66	190.731	165.948	128.432	136.379	174.466	152.656	149.182	157.916	150.32	126.411
YBR172C	SMY2	245.633	170.632	158.767	180.522	230.747	170.602	152.38	159.079	168.679	207.986
YBR173C	UMP1	267.273	211.566	184.854	242.102	126.062	216.228	168.343	239.716	241.583	188.951
YBR175W	SWD3	129.326	142.253	157.1	148.914	132.968	131.384	187.084	149.126	158.634	95.5425
YBR176W	ECM31	152.81	169.008	142.902	191.177	138.001	189.92	149.49	216.828	172.683	123.785
YBR177C	EHT1	247.382	244.466	215.371	260.505	204.79	242.247	196.626	231.492	211.396	210.292
YBR179C	FZO1	105.537	113.706	102.466	115.803	117.619	97.7006	144.563	120.41	116.269	147.51
YBR180W	DTR1	64.1443	75.1721	90.0453	62.3789	82.3538	70.607	95.0921	82.5103	76.2396	113.554
YBR181C	RPS6B	824.088	625.79	474.435	582.429	397.769	399.38	394.149	565.151	401.572	425.905
YBR182C	SMP1	80.9483	93.2609	89.7101	84.7473	84.2954	80.5872	82.7124	83.1196	98.5504	109.23
YBR182C-A	YBR182C-A	125.293	112.18	55.118	111.712	123.622	82.6257	95.8593	79.3577	129.676	140.076
YBR184W	YBR184W	57.7896	60.5668	59.258	53.2282	74.9155	63.9705	72.5964	59.7829	85.5144	102.889
YBR185C	MBA1	113.094	118.017	121.239	110.07	112.04	92.7478	130.105	110.362	110.478	96.3042
YBR186W	PCH2	91.3491	87.1182	79.5945	69.5384	109.113	115.617	100.882	109.961	82.9814	86.3096
YBR187W	GDT1	282.046	187.119	166.439	190.291	174.73	162.235	228.329	181.94	190.612	163.729
YBR188C	NTC20	187.117	146.364	172.055	136.349	137.049	186.086	182.459	150.8	162.034	101.019
YBR189W	RPS9B	1001.64	893.834	522.61	585.393	667.943	415.487	376.805	592.264	436.614	369.417
YBR191W	RPL21A	871.729	749.124	451.928	546.069	629.338	375.861	352.404	530.625	435.119	313.142
YBR192W	RIM2	168.804	181.914	159.456	141.76	139.25	123.08	150.107	161.05	168.43	140.801
YBR193C	MED8	171.797	152.613	147.27	144.017	136.037	115.537	131.953	156.881	135.07	107.923
YBR194W	SOY1	171.509	169.76	155.769	162.9	142.119	135.999	249.335	158.613	171.613	113.464
YBR195C	MSI1	172.683	145.071	198.418	163.429	153.541	154.932	197.023	157.971	117.075	91.8747
YBR196C	PGI1	643.492	558.06	505.554	439.69	588.164	427.892	529.236	536.721	616.923	705.083
YBR197C	YBR197C	309.084	261.566	333.286	279.868	137.05	226.156	138.099	253.293	208.653	130.876
YBR198C	TAF5	198.428	185.527	161.491	173.188	164.503	140.632	164.796	167.056	176.334	150.381
YBR199W	KTR4	193.493	224.171	201.43	231.239	229.98	217.021	232.267	246.19	229.093	228.026
YBR200W	BEM1	87.0484	97.1865	104.395	93.7919	117.671	116.058	130.449	138.605	120.83	116.395
YBR201C-A	YBR201C-A	94.0143	105.342	168.192	154.091	115.691	149.992	154.35	136.204	150.867	526.948
YBR201W	DER1	105.861	102.368	110.368	138.841	96.2481	144.362	140.411	129.457	140.313	205.643
YBR202W	CDC47	144.568	107.025	140.218	159.551	131.781	197.223	136.559	140.233	168.358	154.271
YBR203W	COS111	75.6513	84.2375	161.296	125.917	119.614	127.353	100.133	121.017	103.188	149.513
YBR204C	YBR204C	91.6791	100.523	111.024	120.209	91.64	92.1083	120.821	130.012	149.428	138.655
YBR205W	KTR3	135.835	101.87	103.944	121.001	115.463	123.201	142.185	120.534	119.644	124.141
YBR207W	FTH1	153.949	125.188	192.795	160.246	156.43	220.7	160.3	148.333	163.437	166.693
YBR208C	DUR1,2	80.2493	81.1421	106.135	91.2983	109.957	88.6488	119.728	103.883	107.177	105.971
YBR211C	AME1	122.256	154.628	154.274	138.774	170.247	112.571	156.584	144.024	142.64	154.569
YBR212W	NGR1	120.927	160.242	148.65	197.135	165.032	188.138	165.062	171.754	185.946	177.847
YBR215W	HPC2	111.016	107.613	105.39	96.8269	100.907	115.226	178.161	101.536	118.074	104.181
YBR216C	YBP1	119.578	129.445	129.725	111.252	130.713	114.478	149.508	131.463	151.806	122.189
YBR217W	ATG12	108.954	159.639	164.86	114.867	165.645	96.8829	167.077	128.013	139.02	124.788
YBR220C	YBR220C	108.163	92.9884	106.565	119.438	101.148	93.8212	113.498	101.823	127.158	84.7153
YBR221C	PDB1	188.238	230.563	296.223	296.666	204.065	212.755	237.368	260.181	240.399	202.134
YBR223C	TDP1	86.2371	101.792	111.879	105.527	91.3209	105.664	117.038	110.934	155.678	112.371
YBR225W	YBR225W	102.428	124.536	114.12	133.781	117.371	109.033	134.752	139.105	136.392	118.074
YBR227C	MCX1	98.4216	125.727	140.031	117.287	171.283	145.625	127.573	156.365	154.795	111.24
YBR228W	SLX1	130.213	166.175	178.611	155.367	179.749	173.202	171.489	167.979	149.774	113.148
YBR229C	ROT2	111.736	179.292	158.856	152.895	172.795	207.527	185.292	181.884	161.528	157.228
YBR230W-A	YBR230W-A	1351.57	668.493	610.768	729.558	532.765	477.822	545.71	459.185	492.332	731.964
YBR231C	SWC5	122.274	70.4435	92.9936	109.119	84.9637	89.25	95.0994	73.7684	103.201	123.347
YBR233W	PBP2	105.349	75.5756	104.053	95.625	87.1091	94.5679	111.433	97.6663	106.327	103.589
YBR233W-A	DAD3	154.575	146.566	162.415	134.883	167.884	171.482	158.787	131.939	131.141	159.189
YBR234C	ARC40	159.621	171.627	180.99	200.972	148.185	162.768	199.156	191.818	217.553	201.181
YBR235W	YBR235W	111.534	110.144	119.572	121.456	129.547	120.74	137.059	119.635	119.756	121.523
YBR236C	ABD1	126.417	134.277	130.104	138.814	125.017	147.36	165.53	147.068	196.698	137.425
YBR237W	PRP5	101.281	114.71	101.44	110.151	114.823	132.262	145.78	121.142	114.444	135.776
YBR238C	YBR238C	95.1904	66.9472	56.6399	65.5949	84.4236	86.903	103.072	75.5852	99.3395	95.039
YBR239C	YBR239C	140.564	126.023	118.69	122.588	125.279	149.287	134.848	144.162	218.024	110.659
YBR240C	THI2	58.6994	77.4651	97.1577	95.2433	94.7993	90.9772	100.507	99.7319	87.5833	100.612
YBR241C	YBR241C	60.0586	91.2471	129.251	148.901	87.4685	131.185	112.781	108.986	137.423	115.117
YBR242W	YBR242W	163.26	101.1	116.208	113.037	139.949	138.807	131.484	111.123	165.924	264.894
YBR243C	ALG7	126.245	79.5112	88.8077	88.7163	106.562	104.434	155.417	77.7562	122.257	97.0646
YBR244W	GPX2	207.165	224.523	215.386	85.3968	202.423	116.563	191.175	131.381	156.291	122.406
YBR245C	ISW1	124.343	88.0468	97.1262	79.6772	130.581	102.331	102.302	85.2675	118.966	120.431
YBR246W	YBR246W	122.01	96.2166	87.2475	124.092	82.7806	88.6231	124.16	104.96	128.917	161.063
YBR247C	ENP1	138.076	65.1511	82.2979	84.0063	120.555	83.9517	98.9553	63.4391	104.444	94.592
YBR251W	MRPS5	143.413	140.507	102.666	138.43	110.504	123.822	134.378	111.661	142.618	128.372
YBR252W	DUT1	185.634	159.778	186.925	190.871	122.479	180.646	129.678	116.615	229.832	210.95
YBR253W	SRB6	248.475	316.878	228.134	218.59	209.817	188.08	220.746	251.651	200.453	168.671
YBR254C	TRS20	170.867	230.257	127.223	146.35	120.843	180.561	174.854	179.501	164.132	124.132
YBR255C-A	YBR255C-A	253.857	324.643	282.041	259.765	393.077	288.387	276.098	345.797	270.823	238.161
YBR257W	POP4	144.23	141.975	128.572	121.904	160.125	135.636	164.968	137.572	175.411	166.498
YBR258C	SHG1	156.378	167.507	115.832	130.074	140.364	148.623	165.066	153.544	103.825	113.77
YBR259W	YBR259W	90.6206	82.5159	72.5078	79.3922	105.64	74.882	108.917	86.5737	115.167	89.6865
YBR260C	RGD1	120.522	103.603	108.31	117.615	112.874	108.018	107.225	113.473	116.849	171.34
YBR261C	YBR261C	136.782	117.292	144.142	186.028	121.069	166.717	179.21	131.564	119.684	148.723
YBR262C	FMP51	196.56	237.349	261.578	321.075	249.127	313.08	220.464	214.956	285.515	197.942
YBR263W	SHM1	150.456	133.81	131.047	162.909	159.366	200.716	132.927	154.752	154.65	115.667
YBR264C	YPT10	141.107	143.497	157.554	138.802	104.25	122.374	136.828	123.341	102.798	122.239
YBR265W	TSC10	151.842	91.4354	108.276	122.529	93.8605	123.628	120.566	105.444	107.608	72.323
YBR267W	REI1	145.938	68.952	96.6844	109.241	86.4369	97.0558	116.141	99.0224	126.031	92.7872
YBR268W	MRPL37	184.276	130.157	159.271	197.803	120.453	142.542	170.792	137.637	197.529	268.746
YBR269C	FMP21	154.301	162.607	149.82	179.789	113.55	191.691	253.545	187.125	128.845	182.152
YBR270C	BIT2	100.673	84.5892	84.2544	116.9	126.128	94.016	94.5525	82.1999	112.247	115.513
YBR271W	YBR271W	95.9814	58.2148	50.8787	76.2167	95.2687	83.2389	112.497	82.914	96.765	121.75
YBR272C	HSM3	94.6145	107.601	87.0672	82.2915	100.587	88.1439	87.4011	117.393	134.834	122.759
YBR273C	UBX7	99.5123	102.861	112.354	120.676	92.4404	103.952	137.653	135.977	108.718	100.628
YBR274W	CHK1	84.0856	77.8046	87.2798	84.1105	123.913	101.821	95.9283	81.3096	91.266	134.036
YBR275C	RIF1	84.9739	55.9874	73.2068	67.1406	98.8437	94.055	100.478	85.005	99.7952	100.64
YBR276C	PPS1	102.922	83.3932	95.7841	99.6858	84.7174	129.216	116.59	126.504	97.6328	113.309
YBR278W	DPB3	137.673	93.0305	151.027	107.574	250.395	124.043	149.543	122.202	141.517	82.5257
YBR279W	PAF1	174.247	181.722	147.603	181.432	254.546	188.296	200.785	194.878	228.363	212.227
YBR281C	YBR281C	84.0822	72.8655	69.7284	65.5154	94.0407	89.3059	100.792	90.5077	83.9578	66.0748
YBR282W	MRPL27	192.403	181.516	163.305	142.633	146.522	127.699	184.123	147.628	153.421	131.545
YBR283C	SSH1	242.376	212.632	230.831	196.176	277.57	147.115	194.315	159.157	189.037	204.049
YBR284W	YBR284W	66.9541	79.4121	85.2253	75.2319	77.2471	56.7042	99.7406	91.1831	85.1749	73.6555
YBR287W	ZSP1	224.455	289.779	284.956	293.609	231.445	206.347	186.081	208.246	220.445	197.043
YBR288C	APM3	144.722	137.676	125.683	114.089	143.416	142.853	119.454	152.83	125.674	112.039
YBR289W	SNF5	109.019	76.8948	101.871	93.997	90.2641	79.925	119.319	105.184	116.192	97.794
YBR290W	BSD2	198.424	216.671	240.569	247.966	182.669	183.971	221.03	249.788	229.366	162.605
YBR291C	CTP1	152.777	160.901	154.238	140.942	110.908	136.995	153.668	147.66	175.846	232.18
YBR293W	VBA2	119.298	134.236	114.146	141.683	151.251	174.043	207.978	170.216	176.16	235.068
YBR294W	SUL1	83.0263	88.1528	90.1024	95.4918	100.005	96.3509	133.785	116.046	115.47	98.9973
YBR295W	PCA1	77.3778	70.0691	91.9034	104.801	100.826	89.3729	105.23	85.4074	109.572	113.036
YBR296C	PHO89	39.7672	33.997	63.5462	55.6102	54.4471	40.5274	63.15	51.8	88.0374	37.091
YBR298C	MAL31	90.778	78.6199	74.1441	81.6744	82.9091	70.9747	105.178	93.4979	96.2711	70.8694
YBR298C-A	YBR298C-A	68.0492	46.3458	53.2212	43.7268	50.0342	46.4093	73.6727	53.7732	50.4057	54.4609
YBR299W	MAL32	101.676	89.4123	78.5272	87.2068	102.844	106.779	102.372	98.461	108.732	99.0659
YCL001W	RER1	200.115	136.841	154.65	110.997	145.996	137.759	158.197	118.58	134.28	155.328
YCL001W-A	YCL001W-A	128.342	104.196	87.3681	80.0283	89.5673	115.766	143.324	114.262	184.574	95.4648
YCL002C	YCL002C	182.751	122.085	151.2	117.281	147.058	148.865	151.642	132.078	162.715	149.235
YCL004W	PGS1	136.112	112.886	138.328	107.114	112.932	140.202	155.293	112.304	124.756	114.617
YCL005W	LDB16	164.744	138.844	163.844	171.351	152.77	147.565	186.092	147.146	129.774	148.886
YCL005W-A	VMA9	663.589	436.995	486.376	558.162	309.677	624.475	512.804	486.116	326.768	503.981
YCL010C	SGF29	282.949	283.401	314.237	404.065	251.509	252.844	273.961	317.15	294.918	202.263
YCL011C	GBP2	317.183	224.996	261.837	276.365	241.251	284.454	232.197	241.65	328.411	359.425
YCL012C	YCL012C	154.837	137.17	137.483	114.965	165.693	131.277	142.314	181.562	145.207	105.195
YCL014W	BUD3	109.542	76.8908	103.153	83.3395	119.899	90.4744	109.863	105.339	115.081	117.43
YCL016C	DCC1	80.6011	76.9772	113.893	113.572	92.033	96.7437	89.546	128.203	113.773	101.133
YCL017C	NFS1	111.382	108.478	158.372	160.588	183.139	169.118	142.508	159.676	168.716	166.074
YCL021W-A	YCL021W-A	63.2423	84.9283	89.6912	88.0226	92.377	92.4249	109.034	138.916	113.365	71.8712
YCL024W	KCC4	96.8924	44.5349	59.7789	55.6321	66.0675	72.0703	74.3376	64.647	79.164	81.8405
YCL025C	AGP1	212.896	258.204	477.03	133.951	287.081	226.084	303.828	136.832	178.248	454.994
YCL026C-A	FRM2	52.4092	50.3551	70.0637	71.0372	116.441	180.981	98.2509	72.7427	104.358	108.553
YCL028W	RNQ1	102.51	125.215	128.692	144.658	103.458	97.9407	120.411	151.218	122.827	77.0435
YCL029C	BIK1	150.893	204.266	215.146	204.007	130.5	226.754	194.008	278.547	164.996	146.766
YCL031C	RRP7	278.048	259.643	243.4	208.613	236.081	210.829	249.617	241.15	234.404	206.459
YCL032W	STE50	104.56	96.6794	109.901	159.614	104.92	134.445	129.564	119.359	138.532	177.469
YCL033C	YCL033C	111.56	124.426	165.593	204.173	120.761	123.631	118.484	135.909	157.089	119.922
YCL034W	LSB5	135.453	137.341	204.069	219.98	106.753	166.777	150.925	136.312	178.057	150.152
YCL035C	GRX1	272.973	321.375	275.957	318.462	164.325	245.69	231.714	369.997	236.074	173.45
YCL036W	GFD2	108.927	71.7612	84.7903	134.96	84.7975	83.6906	75.2804	75.4924	93.6084	113.746
YCL037C	SRO9	361.754	189.498	155.851	224.561	215.4	182.473	188.935	162.761	172.338	171.611
YCL038C	ATG22	99.75	111.452	131.071	116.917	137.935	110.02	149.478	135.225	160.425	118.594
YCL039W	GID7	116.417	169.004	176.789	216.524	156.425	174.358	203.784	194.246	169.118	195.383
YCL040W	GLK1	480.543	719.687	663.518	979.001	463.322	348.503	740.063	538.694	459.671	523.307
YCL043C	PDI1	431.233	239.328	317.584	390.678	274.199	355.614	301.338	279.575	236.709	336.006
YCL044C	MGR1	155.168	113.607	144.424	171.305	113.528	151.551	165.687	150.078	173.688	136.756
YCL045C	YCL045C	156.165	148.592	144.976	170.354	160.738	150.022	164.351	161.222	205.089	157.95
YCL047C	YCL047C	89.2588	97.81	114.427	124.916	129.548	112.369	143.585	123.6	148.476	123.285
YCL048W	SPS22	45.8173	52.9491	58.7572	82.0683	72.9982	58.559	111.415	81.7207	89.3117	79.4423
YCL048W-A	YCL048W-A	54.0311	74.5291	58.1533	103.001	98.2583	131.328	59.1381	66.4628	115.862	366.528
YCL049C	YCL049C	111.46	142.819	175.289	191.69	132.3	171.015	172.373	223.552	185.981	144.55
YCL050C	APA1	195.1	132.878	169.221	145.689	128.993	196.022	145.119	145.79	150.982	188.631
YCL051W	LRE1	121.216	129.553	140.231	166.351	133.937	109.8	155.429	141.368	158.554	121.066
YCL052C	PBN1	120.098	133.959	111.685	152.482	118.111	95.9445	149.161	143.54	174.043	124.992
YCL054W	SPB1	167.838	77.5136	87.2301	109.658	130.317	104.229	122.32	101.856	124.496	160.336
YCL055W	KAR4	367.932	393.924	182.551	137.245	151.397	160.392	137.402	220.914	123.523	85.7222
YCL056C	YCL056C	272.804	289.198	216.789	188.368	173.88	193.42	252.753	175.681	160.225	154.859
YCL057C-A	YCL057C-A	298.006	180.531	247.907	286.495	123.852	162.859	203.603	148.469	241.225	235.6
YCL057W	PRD1	158.343	123.889	129.113	126.829	112.689	114.424	152.065	133.77	124.822	108.445
YCL058W-A	YCL058W-A	328.837	200.21	193.902	243.992	160.505	231.773	175.963	231.698	268.816	185.623
YCL059C	KRR1	131.93	58.2641	53.9632	73.3027	89.1159	98.8279	98.7507	80.8721	88.468	85.537
YCL061C	MRC1	106.745	67.4746	82.4895	75.2862	94.4087	90.8359	103.747	101.211	89.2607	106.991
YCL063W	VAC17	185.729	134.882	148.917	216.187	235.725	178.956	253.232	171.786	169.235	164.482
YCL069W	VBA3	33.7949	36.099	38.8802	39.1551	61.1361	53.2238	65.8058	45.2216	57.2926	51.5908
YCR002C	CDC10	173.824	138.269	157.893	137.312	144.841	204.976	158.938	135.546	179.982	171.518
YCR003W	MRPL32	172.81	211.098	141.521	143.905	238.622	165.262	167.26	207.343	194.054	161.25
YCR004C	YCP4	166.333	210.228	240.934	266.29	152.794	158.821	153.603	204.629	139.451	126.708
YCR009C	RVS161	221.294	223.193	221.758	181.659	147.898	221.442	163.744	248.417	165.205	165.284
YCR010C	ADY2	61.28	58.0144	71.1959	97.7069	76.8133	77.3028	99.0821	80.5831	79.4211	186.839
YCR011C	ADP1	164.357	138.96	138.157	150.716	161.535	145.214	150.389	150.442	144.761	163.527
YCR012W	PGK1	1996.6	1364.48	1546.15	1496.55	922.625	1434.85	1445.26	1316.57	1271.05	1544.61
YCR015C	YCR015C	205.13	156.644	109.719	125.036	124.827	153.514	175.868	130.079	114.848	148.016
YCR016W	YCR016W	122.221	80.3672	96.3004	100.456	107.123	103.145	136.961	102.825	133.386	90.2365
YCR017C	CWH43	132.706	131.713	164.54	150.235	159.171	176.216	188.962	161.506	149.057	203.635
YCR020C	PET18	123.084	140.945	126.057	129.258	171.294	188.624	171.723	164.832	162.482	125.767
YCR020C-A	MAK31	152.348	144.546	151.335	173.149	208.003	192.498	200.243	196.036	241.633	300.886
YCR020W-B	HTL1	173.442	115.721	125.652	101.376	111.452	119.436	136.775	132.528	146.956	125.232
YCR026C	NPP1	137.755	113.301	121.726	158.554	138.346	140.545	121.319	137.29	134.331	130.984
YCR027C	RHB1	128.622	109.561	93.7555	119.396	137.289	112.869	127.198	108.039	136.893	107.519
YCR028C	FEN2	118.775	102.189	108.968	129.059	171.795	129.47	150.716	125.362	207.7	143.887
YCR028C-A	RIM1	239.785	182.784	202.073	132.654	252.065	196.451	206.243	132.042	200.964	135.248
YCR030C	SYP1	154.091	193.553	185.451	204.763	179.403	158.738	179.046	195.301	175.83	154.857
YCR031C	RPS14A	945.746	832.13	646.349	709.528	601.245	524.217	467.863	628.645	486.647	476.768
YCR032W	BPH1	92.4554	112.299	94.8599	95.6399	117.207	83.6484	128.134	118.885	126.84	144.88
YCR033W	SNT1	176.671	129.816	146.506	149.715	152.491	136.094	167.208	139.886	171.522	177.144
YCR034W	FEN1	271.944	148.795	173.074	128.09	145.045	144.256	186.899	154.267	182.155	186.471
YCR035C	RRP43	211.161	166.708	150.521	168.886	225.741	161.707	159.433	186.516	219.484	179.272
YCR036W	RBK1	161.918	205.981	159.295	179.869	242.433	182.407	216.748	242.404	202.414	235.941
YCR037C	PHO87	114.228	102.716	100.28	116.971	110.45	123.777	130.909	113.855	126.855	137.083
YCR042C	TAF2	168.464	134.112	134.569	122.503	156.132	139.457	151.055	151.746	173.618	159.067
YCR043C	YCR043C	217.608	149.187	162.568	122.392	118.983	137.388	137.451	122.587	118.948	101.21
YCR044C	PER1	226.152	143.506	132.826	131.804	124.276	145.842	141.21	125.234	124.03	117.414
YCR045C	YCR045C	121.373	93.3456	117.841	116.598	98.798	88.3358	97.5025	90.5531	113.702	116.361
YCR046C	IMG1	263.867	187.426	267.099	257.914	164.874	159.29	196.539	196.365	202.276	131.82
YCR047C	BUD23	108.521	74.0809	96.7765	131.544	132.35	116.6	88.6041	119.656	137.674	75.8632
YCR048W	ARE1	88.5221	95.7268	151.579	223.163	115.664	145.196	150.873	164.985	146.22	139.074
YCR051W	YCR051W	139.096	117.052	156.367	225.51	128.229	187.881	161.916	105.791	170.162	187.76
YCR052W	RSC6	121.152	161.127	171.261	222.04	175.146	283.291	159.488	198.502	195.021	156.519
YCR054C	CTR86	116.869	141.572	107.829	119.521	147.469	137.508	129.456	164.099	133.794	160.747
YCR057C	PWP2	156.26	65.2121	73.6976	89.9898	98.4405	107.641	107.689	104.533	122.784	92.1981
YCR059C	YIH1	131.49	100.818	157.647	169.303	114.913	199.162	101.888	96.5293	180.499	123.292
YCR060W	TAH1	113.996	95.7051	134.839	161.236	148.66	134.613	110.784	134.432	144.125	199.536
YCR061W	YCR061W	121.988	131.879	148.097	208.71	82.6638	120.962	142.126	144.895	119.486	89.7322
YCR063W	BUD31	330.383	187.979	159.421	276.739	202.97	245.563	245.06	224.482	199.138	206.897
YCR065W	HCM1	394.144	282.646	196.899	244.401	253.131	220.538	199.343	275.024	194.488	169
YCR066W	RAD18	112.193	107.638	114.33	95.0816	117.936	93.7993	129.14	107.17	126.847	80.2151
YCR067C	SED4	140.352	116.36	124.364	132.214	116.145	137.79	139.468	139.881	174.611	178.33
YCR068W	ATG15	107.688	117.53	172.518	181.903	109.635	119.637	136.871	131.026	157.581	118.024
YCR069W	CPR4	184.452	219.256	240.293	278.358	236.857	242.784	206.969	300.289	201.654	215.146
YCR071C	IMG2	253.911	275.209	300.497	298.487	358.161	312.976	258.903	294.807	254.774	214.984
YCR072C	RSA4	137.799	65.9008	60.8656	89.8961	105.272	92.5285	99.0865	105.143	92.702	123.01
YCR073C	SSK22	88.8535	72.9327	89.262	80.7146	105.429	83.2971	115.069	94.0001	111.316	132.469
YCR073W-A	SOL2	97.6176	107.404	144.437	178.459	205.227	95.8093	160.989	180.228	166.128	94.7388
YCR075C	ERS1	116.254	111.019	110	135.15	105.602	106.989	121.2	115.595	119.908	171.602
YCR075W-A	YCR075W-A	189.784	173.633	167.266	188.6	134.329	183.619	140.253	159.828	124.47	155.28
YCR076C	YCR076C	125.815	130.866	166.685	155.176	149.247	110.97	156.262	134.037	102.647	118.041
YCR077C	PAT1	161.403	131.177	161.557	159.986	134.768	185.657	144.695	157.824	156.826	192.499
YCR079W	AUP1	152.537	166.1	210.485	197.707	95.5128	211.906	136.792	213.574	162.051	105.683
YCR081W	SRB8	88.4242	97.6517	87.3805	96.4982	101.225	97.3072	107.907	113.31	108.993	104.776
YCR082W	AHC2	207.42	178.86	153.367	158.744	171.631	225.252	236.471	188.118	202.212	168.823
YCR083W	TRX3	181.753	172.495	204.761	253.017	149.592	190.986	150.887	157.633	174.659	150.535
YCR084C	TUP1	225.6	145.176	172.568	188.278	175.734	148.574	180.2	162.56	201.517	176.201
YCR086W	CSM1	129.811	112.747	106.036	111.971	75.3042	98.168	73.9443	128.501	97.3897	98.0597
YCR087C-A	LUG1	144.168	96.9783	118.072	109.076	88.4427	152.11	97.3133	97.414	108.362	80.3065
YCR088W	ABP1	150.828	163.155	169.051	212.763	135.848	169.313	168.15	178.32	172.912	137.535
YCR090C	YCR090C	142.426	148.498	192.288	104.856	187.047	142.297	174.821	134.12	129.141	130.007
YCR091W	KIN82	81.9517	121.383	112.044	126.404	120.337	79.7955	128.805	134.121	143.197	136.7
YCR092C	MSH3	117.064	120.76	94.3425	99.5738	141.982	93.9662	106.702	116.418	106.212	111.812
YCR093W	CDC39	260.143	192.514	156.746	186.045	193.666	181.546	208.152	192.758	199.476	223.62
YCR094W	CDC50	95.1154	87.6219	97.7645	105.14	85.863	96.8274	152.653	105.302	104.787	178.584
YCR095C	OCA4	110.375	105.117	89.7284	84.0602	90.6199	115.458	136.413	92.9765	98.4195	127.499
YCR098C	GIT1	35.6647	40.1246	48.9949	64.7024	62.2379	63.4569	77.8561	61.0669	68.5284	115.391
YCR101C	YCR101C	78.3091	128.442	135.438	110.709	137.865	110.606	122.216	124.051	151.739	124.162
YCR102C	YCR102C	37.9235	47.6894	69.414	48.1889	94.4635	72.6405	86.0812	58.9012	75.3474	93.7846
YCR104W	PAU3	38.5516	45.1292	88.5056	71.6113	60.4355	54.3578	74.6365	69.6632	136.589	116.348
YCR105W	ADH7	50.4063	49.228	75.7672	80.6122	87.8023	97.6991	93.9846	64.048	86.135	95.8899
YCR106W	RDS1	69.2981	97.5253	102.55	111.59	175.07	179.311	144.139	162.403	203.142	152.381
YDL001W	RMD1	123.634	82.9717	98.202	99.8322	94.6828	98.5845	124.3	110.4	101.984	110.541
YDL002C	NHP10	148.36	132.901	127.13	117.694	92.9725	134.815	137.81	135.101	123.85	159.95
YDL003W	MCD1	233.727	74.0811	86.9265	77.7304	107.349	104.045	96.6785	112.942	90.6868	61.6511
YDL004W	ATP16	217.877	155.609	140.172	186.676	146.603	168.77	221.73	237.874	159.12	203.329
YDL005C	MED2	147.269	140.566	124.665	149.213	158.706	168.558	178.415	175.316	179.675	196.089
YDL006W	PTC1	176.57	156.651	170.62	149.114	197.307	159.213	174.304	194.747	231.971	252.325
YDL007C-A	YDL007C-A	33.3938	33.2802	24.5219	40.642	39.4593	45.3459	148.63	40.0201	43.4849	117.573
YDL007W	RPT2	219.161	156.733	154.309	164.134	143.309	169.787	182.357	169.4	207.524	213.246
YDL008W	APC11	238.039	168.568	223.952	172.667	122.478	116.071	150.415	130.448	123.704	179.06
YDL010W	YDL010W	170.056	135.674	320.537	135.56	88.0799	205.63	222.551	180.981	192.328	103.887
YDL012C	YDL012C	248.49	204.936	402.684	275.906	245.536	271.265	249.012	200.486	271.991	201.476
YDL013W	HEX3	125.1	116.121	145.033	145.809	126.527	126.581	149.908	156.788	157.818	135.106
YDL014W	NOP1	398.918	189.679	137.825	242.175	216.108	277.246	239.546	205.593	264.981	235.283
YDL015C	TSC13	223.87	221.913	148.841	180.937	149.208	159.004	205.415	184.395	195.12	148.836
YDL017W	CDC7	99.4258	88.3471	101.149	107.605	90.1214	80.4244	134.343	105.188	115.422	87.8655
YDL018C	ERP3	131.673	96.1207	99.925	119.997	101.797	94.6177	147.626	98.3754	116.757	119.685
YDL019C	OSH2	121.58	140.553	165.18	187.223	133.944	130.856	165.636	162.843	183.812	138.527
YDL020C	RPN4	362.311	311.851	379.346	406.779	309.636	555.016	479.879	379.182	400.638	514.643
YDL021W	GPM2	184.207	266.711	159.83	216.419	207.115	202.205	217.595	232.322	176.143	163.887
YDL027C	YDL027C	128.473	170.034	128.495	142.976	155.231	136.139	178.624	151.698	161.757	168.209
YDL028C	MPS1	133.587	102.376	100.795	118.746	157.874	95.2731	150.864	119.4	141.283	166.501
YDL029W	ARP2	189.983	191.66	215.061	226.045	172.718	192.785	206.026	242.18	269.173	223.553
YDL030W	PRP9	97.0973	84.2629	82.7487	101.558	106.282	100.662	105.343	98.9384	108.315	136.71
YDL031W	DBP10	112.615	70.1531	71.9269	82.492	107.83	93.8838	96.8834	87.2359	138.172	121.837
YDL033C	SLM3	222.624	179.379	242.57	279.032	226.743	288.165	244.278	209.6	204.844	278.278
YDL035C	GPR1	135.222	175.509	151.432	157.264	208.065	185.086	201.868	188.92	171.659	202.131
YDL036C	PUS9	109.632	90.2003	106.51	102.282	143.978	108.333	143.01	119.342	136.637	101.296
YDL037C	BSC1	33.6491	51.0955	97.3118	59.0337	90.2449	62.2898	91.4791	92.864	67.7824	121.313
YDL040C	NAT1	142.904	122.463	119.884	107.416	142.811	115.615	155.307	140.164	152.07	203.615
YDL042C	SIR2	94.1696	57.4603	81.6564	73.1392	102.593	77.6423	97.3461	68.7441	121.618	91.1125
YDL043C	PRP11	111.724	98.1707	80.7479	101.905	186.677	72.7316	120.282	126.101	102.653	223.831
YDL044C	MTF2	121.835	117.914	100.04	130.334	103.71	96.8464	166.266	123.813	179.074	128.563
YDL045C	FAD1	130.091	149.56	131.124	143.485	113.8	115.02	124.448	178.613	149.365	96.4572
YDL045W-A	MRP10	278.335	340.436	288.594	251.438	201.759	330.609	219.843	275.5	243.045	212.164
YDL046W	NPC2	320.407	445.741	305.9	450.871	312.812	335.965	271.985	452.133	281.686	184.428
YDL049C	KNH1	151.612	90.1548	113.511	116.288	203.693	144.891	128.575	117.634	97.5808	121.596
YDL051W	LHP1	232.204	109.257	90.8824	130.286	144.931	159.476	154.157	118.352	177.203	205.047
YDL052C	SLC1	285.402	270.274	236.998	286.903	245.308	265.305	221.83	293.149	154.847	165.434
YDL053C	PBP4	180.555	250.466	173.919	242.08	182.307	219.458	216.339	244.348	188.937	143.932
YDL055C	PSA1	1295.22	570.883	433.676	470.637	501.395	382.671	477.049	415.363	422.931	322.493
YDL056W	MBP1	203.252	149.306	141.548	137.198	154.055	132.896	162.153	160.528	136.269	183.973
YDL057W	YDL057W	88.5272	100.24	93.7037	106.736	106.966	73.5062	86.0747	113.678	154.445	96.2798
YDL058W	USO1	99.0032	86.6185	102.077	85.7546	107.628	97.8324	102.283	88.3297	110.223	128.355
YDL059C	RAD59	82.4372	80.2164	99.6262	87.664	61.0291	103.254	98.0484	93.3246	63.7297	84.347
YDL060W	TSR1	137.512	76.9685	80.8023	93.9874	112.027	94.275	93.8597	81.7397	97.8684	113.319
YDL061C	RPS29B	795.268	721.083	550.871	544.156	386.448	535.27	474.402	539.925	513.204	482.929
YDL064W	UBC9	160.8	102.277	81.5205	89.2214	124.392	88.4431	134.35	101.914	119.497	83.3176
YDL069C	CBS1	269.338	249.331	248.678	144.763	214.456	224.895	255.315	225.787	242.179	217.994
YDL070W	BDF2	510.136	334.05	385.335	228.09	333.183	262.425	419.583	301.13	304.55	430.95
YDL072C	YET3	269.689	266.564	314.171	277.523	234.822	162.897	220.725	261.389	296.763	247.322
YDL073W	YDL073W	105.497	103.758	122.178	90.0336	127.246	139.34	160.081	118.814	127.942	126.09
YDL074C	BRE1	237.159	168.664	154.031	153.869	155.629	174.574	186.951	163.28	154.273	155.795
YDL075W	RPL31A	870.455	790.118	499.391	466.103	447.391	580.014	437.056	516.539	566.558	491.306
YDL076C	RXT3	148.229	229.496	194	186.399	209.21	226.257	212.25	241.13	269.143	180.601
YDL077C	VAM6	85.5971	95.3646	105.139	100.95	86.6654	80.9407	104.356	97.8489	106.651	103.511
YDL078C	MDH3	114.682	141.43	132.145	156.517	111.36	143.263	147.106	167.767	95.7411	156.771
YDL079C	MRK1	119.109	128.875	107.986	112.67	121.915	111.062	121.237	131.595	117.462	162.796
YDL080C	THI3	165.359	151.587	147.322	168.659	106.524	150.257	150.923	167.743	144.153	117.281
YDL081C	RPP1A	933.523	681.727	505.321	520.299	422.344	470.484	352.338	518.43	388.637	445.557
YDL082W	RPL13A	583.861	496.917	334.661	390.716	271.017	287.248	205.957	309.105	297.264	217.413
YDL083C	RPS16B	779.953	733.21	438.284	453.186	485.166	316.287	291.218	526.48	331.86	367.859
YDL084W	SUB2	337.927	273.202	230.397	225.138	281.371	224.617	251.062	248.544	236.731	235.943
YDL085C-A	YDL085C-A	209.8	244.681	243.375	251.376	199.996	177.598	228.514	193.78	223.207	147.237
YDL085W	NDE2	123.552	164.834	149.919	189.607	167.147	183.402	171.782	228.428	179.292	152.966
YDL086W	YDL086W	236.109	255.964	278.009	313.483	175.205	213.663	175.735	305.529	159.908	116.444
YDL087C	LUC7	116.847	116.886	121.049	135.809	108.902	108.325	102.777	147.649	111.147	107.115
YDL088C	ASM4	190.418	173.407	166.439	161.299	143.216	162.667	172.611	203.95	167.325	170.888
YDL089W	YDL089W	105.977	146.489	141.378	106.504	132.111	114.22	136.883	146.378	124.215	131.842
YDL090C	RAM1	88.4697	101.165	97.374	108.38	112.823	126.47	116.798	116.997	124.733	97.0921
YDL091C	UBX3	116.355	139.506	121.463	128.089	109.845	124.655	123.295	147.108	124.589	144.085
YDL092W	SRP14	201.174	220.875	230.375	214.2	295.005	204.448	208.778	249.389	228.834	257.723
YDL093W	PMT5	94.9035	70.6832	106.358	86.4607	118.647	101.856	134.44	87.3846	103.294	91.608
YDL095W	PMT1	241.829	123.115	177.951	172.613	152.749	160.469	185.307	157.232	174.471	161.918
YDL097C	RPN6	249.181	190.558	211.806	229.421	171.085	234.984	190.956	207.07	177.118	249.623
YDL098C	SNU23	115.64	121.473	120.902	119.567	98.4287	110.354	157.822	136.698	100.1	113.268
YDL099W	BUG1	128.975	128.437	107.908	108.769	97.8311	90.4156	157.696	111.133	134.928	97.7213
YDL100C	GET3	186.24	112.945	131.068	134.629	98.2506	162.157	157.176	132.752	120.567	151.755
YDL101C	DUN1	116.55	73.1205	86.0669	69.966	79.2925	84.0438	124.559	89.2699	106.913	105.253
YDL102W	CDC2	79.8793	57.6579	78.8712	66.8421	81.7938	82.3791	111.701	83.25	107.021	112.167
YDL103C	QRI1	86.5817	88.8324	86.1809	96.5234	145.046	98.1787	134.282	101.267	86.6873	88.9809
YDL104C	QRI7	134.256	138.41	137.213	155.719	126.124	160.75	179.026	173.613	129.626	152.02
YDL105W	NSE4	132.73	130.06	123.011	108.258	114.432	122.735	124.594	137.802	124.397	196.447
YDL106C	PHO2	133.633	131.482	144.071	140.164	130.352	153.652	149.999	130.988	169.438	153.093
YDL107W	MSS2	131.628	135.846	128.671	110.174	115.986	116.653	134.525	121.314	107.243	121.327
YDL108W	KIN28	114.588	116.477	107.893	117.248	99.3831	120.413	149.582	116.866	137.428	159.361
YDL109C	YDL109C	90.5152	96.5093	116.994	129.893	114.423	85.201	129.724	112.013	124.56	139.635
YDL110C	TMA17	333.295	439.057	310.157	529.988	223.347	263.472	287.501	414.591	250.27	251.534
YDL111C	RRP42	202.11	146.774	137.699	167.042	251.662	124.88	165.205	152.6	185.541	344.365
YDL112W	TRM3	119.623	85.5094	80.3136	86.8861	121.948	112.384	117.438	107.257	122.704	108.459
YDL113C	ATG20	102.012	133.864	139.815	150.811	116.891	120.926	158.477	151.849	133.672	131.972
YDL114W	YDL114W	47.9582	57.0569	53.8805	75.4796	78.6663	46.9187	87.7393	71.8985	79.9657	50.502
YDL115C	IWR1	131.295	120.081	119.387	147.858	163.107	157.436	166.809	117.949	135.256	127.191
YDL116W	NUP84	179.373	139.493	138.447	129.083	190.014	136.607	166.98	142.851	233.269	194.47
YDL117W	CYK3	170.856	127.195	136.548	121.117	95.1822	124.037	113.634	126.309	105.38	127.219
YDL119C	YDL119C	100.099	148.083	156.265	146.894	102.786	105.754	119.761	125.57	118.336	82.0644
YDL120W	YFH1	194.507	221.775	211.034	230.523	176.342	282.74	202.158	238.158	273.094	316.707
YDL121C	YDL121C	151.077	125.341	89.9036	117.895	152.142	165.076	118.338	139.853	168.433	302.537
YDL122W	UBP1	190.151	152.106	147.195	147.881	139.007	132.068	144.133	152.619	155.166	142.707
YDL123W	SNA4	328.086	408.147	416.823	385.147	208.805	287.655	247.425	410.949	258.464	163.935
YDL124W	YDL124W	454.226	444.538	394.791	335.886	190.977	276.427	263.095	310.722	186.511	225.081
YDL125C	HNT1	579.266	476.668	522.008	471.735	271.775	357.681	356.513	346.309	315.674	277.74
YDL126C	CDC48	337.733	258.587	261.279	321.026	207.174	274.045	252.878	291.772	245.069	268.608
YDL127W	PCL2	262.385	284.014	170.852	183.657	166.386	164.029	136.695	201.949	134.765	107.757
YDL128W	VCX1	265.703	225.95	238.165	229.291	180.281	211.176	151.947	222.612	181.223	191.974
YDL129W	YDL129W	154.018	120.314	122.458	111.808	128.288	107.22	133.294	107.823	86.0582	101.086
YDL130W	RPP1B	980.28	799.797	631.365	639.817	488.748	424.086	447.623	626.191	460.974	421.115
YDL132W	CDC53	142.835	138.088	121.132	163.242	147.587	174.115	164.797	135.469	158.657	149.24
YDL133W	YDL133W	176.003	194.002	166.934	188.037	196.883	157.778	150.904	209.934	191.481	132.993
YDL134C	PPH21	235.244	239.817	264.833	274.892	214.416	228.703	234.503	224.961	205.064	163.418
YDL135C	RDI1	213.559	225.353	168.114	176.969	160.871	143.838	135.232	231.793	148.098	147.032
YDL136W	RPL35B	659.385	518.892	336.923	391.809	349.526	301.872	309.064	427.982	317.419	277.389
YDL137W	ARF2	582.213	481.409	423.283	479.463	369.122	435.709	298.186	396.878	385.929	284.08
YDL138W	RGT2	177.682	177.116	236.16	212.883	188.905	251.325	180.564	216.578	177.348	142.66
YDL139C	SCM3	86.5555	120.774	89.6834	129.858	186.175	72.9373	88.5994	173.122	86.1472	134.167
YDL140C	RPO21	306.238	217.977	244.194	255.241	271.234	241.417	250.81	235.366	244.158	267.724
YDL141W	BPL1	113.004	109.789	142.937	116.122	147.967	147.595	112.839	153.907	186.572	158.261
YDL142C	CRD1	144.514	136.544	137.007	141.145	155.922	105.378	129.447	135.199	137.901	158.016
YDL143W	CCT4	224.447	136.982	146.896	155.982	138.976	159.963	195.264	162.003	185.43	207.486
YDL144C	YDL144C	156.461	129.46	146.632	211.023	96.0857	127.617	140.215	132.511	108.31	129.933
YDL145C	COP1	200.077	158.541	175.19	187.883	144.255	181.682	167.667	166.088	197.957	184.59
YDL147W	RPN5	308.628	223.764	168.835	190.134	231.174	248.714	237.213	278.121	251.641	338.675
YDL148C	NOP14	113.49	64.241	59.1977	79.6098	132.69	91.402	71.0312	71.1619	105.308	123.685
YDL149W	ATG9	79.5375	79.1847	82.1376	84.8309	94.8719	79.1549	88.8403	97.6415	110.258	77.4419
YDL150W	RPC53	125.843	74.5536	78.0781	99.2456	98.7178	91.416	95.9279	96.7022	99.2441	100.559
YDL153C	SAS10	107.513	57.7168	62.5167	71.6668	84.0335	79.5244	102.171	59.4147	93.0541	128.618
YDL154W	MSH5	90.6766	71.3842	56.4998	66.2791	81.5486	45.0678	106.581	96.3571	107.168	69.2963
YDL155W	CLB3	209.279	122.033	128.549	142.365	145.496	202.164	153.959	149.362	173.618	201.111
YDL156W	YDL156W	99.5238	80.4158	84.228	108.22	97.0886	122.152	107.295	97.93	93.4973	105.822
YDL157C	YDL157C	145.891	141.517	125.081	123.363	123.251	101.054	149.151	205.709	144.165	105.307
YDL159W	STE7	113.035	106.541	102.497	112.796	141.952	147.835	144.5	137.957	147.771	164.809
YDL160C	DHH1	221.636	239.069	212.457	253.851	207.242	214.068	236.968	252.775	250.545	271.252
YDL160C-A	YDL160C-A	156.368	150.945	124.164	140.985	281.578	106.379	157.598	160	105.249	97.3159
YDL161W	ENT1	199.73	163.872	219.198	249.23	163.606	162.005	165.063	186.586	220.115	158.216
YDL164C	CDC9	109.414	64.5433	86.3962	62.8903	97.9001	82.6955	95.9721	71.1377	91.3036	87.0585
YDL165W	CDC36	152.166	125.926	127.556	105.108	155.652	146.442	165.674	119.134	112.981	178.343
YDL166C	FAP7	154.794	142.152	138.158	136.441	130.596	128.086	119.624	164.13	105.924	158.139
YDL167C	NRP1	152.742	134.504	117.639	105.354	111.808	111.784	122.761	119.601	155.084	116.024
YDL168W	SFA1	103.594	127.368	131.059	128.934	129.318	125.151	202.648	141.275	190.471	141.42
YDL173W	YDL173W	142.521	183.647	272.679	248.316	145.919	245.349	199.399	218.14	276.661	182.016
YDL174C	DLD1	160.416	188.223	255.81	256.885	157.973	212.481	186.209	216.544	193.954	194.641
YDL175C	AIR2	171.027	186.013	188.412	194.089	279.59	240.792	220.239	270.367	208.344	194.893
YDL176W	YDL176W	111.899	101.381	104.705	88.8974	166.668	113.771	118.151	113.147	125.795	122.105
YDL178W	DLD2	137.841	156.746	128.559	146.282	120.74	157.157	152.75	141.175	159.817	146.927
YDL179W	PCL9	241.093	166.852	167.068	151.981	103.62	133.641	142.19	147.986	139.15	99.3059
YDL181W	INH1	289.211	367.819	351.154	399.728	304.65	315.704	314.285	268.765	171.97	195.519
YDL185W	TFP1	314.624	307.608	270.824	314.882	236.335	262.433	245.665	302.232	275.462	246.038
YDL186W	YDL186W	166.819	172.298	149.215	159.869	179.665	118.546	131.299	146.997	216.17	161.977
YDL188C	PPH22	149.609	148.807	164.753	164.39	151.425	131.242	203.127	153.512	204.254	153.645
YDL189W	RBS1	147.93	142.65	147.308	156.021	145.173	141.767	182.728	173.365	158.155	171.638
YDL190C	UFD2	158.111	181.909	172.265	166.308	163.753	164.083	159.089	186.636	163.603	138.836
YDL191W	RPL35A	867.623	804.957	572.133	566.69	418.477	465.064	333.254	562.991	393.926	391.736
YDL192W	ARF1	504.761	350.3	356.351	321.822	272.929	335.892	271.565	356.265	325.161	240.537
YDL193W	NUS1	198.045	158.856	118.089	164.934	131.885	112.1	141.04	159.978	183.377	120.147
YDL194W	SNF3	51.7686	56.5318	60.6767	65.6478	105.502	75.8626	82.5094	65.1396	77.3401	73.0838
YDL195W	SEC31	237.295	189.489	235.086	235.615	219.754	205.141	220.918	214.952	244.366	200.092
YDL197C	ASF2	132.44	127.654	143.482	201.607	128.666	164.14	162.866	157.608	148.221	166.272
YDL200C	MGT1	133.408	126.818	130.924	107.193	111.056	147.594	141.862	137.37	104.628	99.7145
YDL201W	TRM8	154.216	127.149	95.537	140.685	183.582	133.808	107.005	112.156	135.858	118.354
YDL202W	MRPL11	182.774	148.321	120.538	158.53	143.021	115.281	158.629	123.551	124.568	135.798
YDL203C	ACK1	101.765	98.7778	94.8714	100.009	121.824	119.182	143.102	102.377	147.156	122.953
YDL205C	HEM3	170.663	146.638	142.769	146.601	148.663	109.241	146.515	151.269	152.794	137.975
YDL206W	YDL206W	96.0855	123.058	103.322	119.613	127.435	108.616	136.607	130.347	129.029	104.399
YDL207W	GLE1	137.955	119.483	119.851	130.752	169.236	146.725	155.804	139.977	164.351	116.964
YDL208W	NHP2	348.554	176.696	106.784	178.114	183.464	146.863	157.356	174.027	294.929	130.871
YDL209C	CWC2	115.303	81.6159	77.3923	109.847	97.6927	116.3	113.281	90.2968	109.223	105.164
YDL210W	UGA4	64.3776	66.2566	68.7486	68.0809	66.4036	57.0617	82.525	93.7369	93.7064	61.5155
YDL211C	YDL211C	123.75	84.1437	95.8147	82.9518	89.6466	82.8628	132.749	98.7738	108.719	112.512
YDL212W	SHR3	174.053	132.595	111.401	146.283	125.862	135.557	144.736	148.268	161.865	196.58
YDL213C	NOP6	114.264	77.2822	81.2173	97.2084	103.914	103.63	119.009	89.0261	174.291	151.062
YDL215C	GDH2	178.126	194.802	165.615	167.926	171.881	198.993	185.993	188.031	227.626	167.232
YDL216C	RRI1	100.859	124.58	114.569	124.323	121.93	114.102	108.048	134.274	133.322	97.8589
YDL217C	TIM22	154.66	148.373	141.322	189.506	115.52	143.291	173.742	167.127	249.871	119.688
YDL218W	YDL218W	73.4996	75.4976	89.7618	115.485	86.7386	68.9102	107.823	85.7275	84.7297	78.4083
YDL219W	DTD1	148.256	116.45	68.8985	89.4782	189.192	73.0027	140.865	126.859	94.2865	175.628
YDL220C	CDC13	97.9861	92.8672	112.615	139.247	110.357	107.416	113.507	124.734	159.59	133.611
YDL224C	WHI4	222.783	195.045	194.483	225.512	266.511	203.339	233.843	240.152	213.726	205.504
YDL225W	SHS1	137.792	118.58	138.611	140.527	119.527	159.242	144.628	115.227	156.503	124.774
YDL226C	GCS1	167.582	139.095	149.94	159.254	132.891	129.463	154.797	152.968	168.398	231.273
YDL229W	SSB1	728.844	368.61	306.746	385.13	389.513	458.219	278.952	344.231	432.696	367.975
YDL230W	PTP1	98.4584	103.743	119.283	108.235	116.22	77.1423	132.254	127.968	103.312	132.779
YDL231C	BRE4	153.495	116.332	129.798	128.308	166.048	150.798	153.85	126.768	138.921	167.602
YDL233W	YDL233W	77.8447	84.8948	101.636	111.576	73.1196	85.2901	100.087	85.1416	111.754	94.1515
YDL235C	YPD1	231.845	221.603	183.087	195.163	232.155	213.395	230.691	205.199	174.236	219.363
YDL236W	PHO13	176.241	161.905	178.625	159.917	172.237	143.664	149.578	199.9	168.285	149.958
YDL237W	YDL237W	112.244	129.018	124.016	115.805	172.962	124.042	127.613	129.962	106.398	135.269
YDL238C	GUD1	94.7641	137.368	160.952	138.96	106.7	93.9072	122.512	151.995	92.4682	187.285
YDL240W	LRG1	134.302	113.408	101.019	92.8731	131.213	119.755	131.535	121.391	139.461	125.702
YDL241W	YDL241W	45.448	55.1859	73.5729	47.4188	118.974	113.906	163.776	54.3901	106.839	85.9242
YDL243C	AAD4	61.0149	61.0612	95.4809	69.1412	68.2038	79.6322	93.7885	75.9385	73.2581	78.4741
YDL248W	COS7	90.6337	98.8886	109.855	93.656	113.814	93.3798	111.872	137.318	150.337	99.0339
YDR002W	YRB1	265.629	177.996	155.692	171.703	225.911	191.471	155.725	154.29	133.768	204.168
YDR003W	RCR2	165.632	166.387	190.957	201.194	152.411	196.735	147.247	192.787	180.013	161.049
YDR004W	RAD57	168.826	145.683	147.657	122.585	169.181	163.947	225.57	187.996	149.118	150.438
YDR005C	MAF1	160.939	140.761	136.298	138.601	121.912	153.116	133.127	125.381	162.778	206.234
YDR006C	SOK1	181.229	159.884	161.071	188.046	169.023	192.153	180.111	147.59	211.153	180.444
YDR007W	TRP1	240.697	225.79	235.533	258.229	209.125	169.422	225.036	199.792	188.519	182.788
YDR012W	RPL4B	762.904	438.032	415.269	498.538	426.235	430.104	343.805	377.577	373.517	423.926
YDR013W	PSF1	222.117	173.965	144.534	120.965	247.156	178.646	170.821	183.21	129.734	100.039
YDR014W	RAD61	81.3002	74.0375	86.1044	67.7965	87.7913	76.6097	101.673	86.0682	116.776	122.681
YDR016C	DAD1	188.254	186.19	150.337	179.693	183.046	207.964	199.22	205.921	153.229	188.087
YDR017C	KCS1	177.017	115.631	113.617	135.469	143.806	138.652	150.86	132.428	138.189	140.361
YDR018C	YDR018C	96.1678	121.759	87.9259	90.674	115.939	89.7839	115.127	88.008	96.0195	82.1938
YDR020C	YDR020C	149.358	158.974	138.215	111.917	144.378	136.353	110.832	131.287	148.787	133.746
YDR021W	FAL1	95.2887	68.8259	75.5793	74.7625	109.209	76.9728	131.981	90.528	119.549	96.9676
YDR022C	CIS1	114.072	103.343	136.889	115.748	125.868	131.559	172.294	115.825	220.725	127.129
YDR023W	SES1	281.188	201.916	148.946	180.69	185.038	203.538	168.154	188.997	196.032	142.673
YDR025W	RPS11A	925.462	803.288	610.665	624.711	423.874	435.229	404.507	604.841	497.242	410.57
YDR026C	YDR026C	157.301	154.577	148.521	140.402	181.187	134.714	163.52	168.641	169.369	135.459
YDR027C	VPS54	144.96	151.305	145.981	134.942	178.83	130.749	178.587	157.909	169.094	150.487
YDR028C	REG1	155.579	162.472	155.75	184.625	196.233	140.546	160.742	162.68	214.371	183.835
YDR030C	RAD28	120.503	107.581	90.7059	109.46	129.3	112.279	129.132	108.361	112.253	120.913
YDR031W	MIC14	157.513	213.094	115.959	157.728	162.585	127.247	159.11	186.658	179.312	131.185
YDR032C	PST2	199.196	291.503	241.927	292.332	201.347	179.994	216.846	197.326	249.811	141.399
YDR033W	MRH1	1263.96	720.021	762.986	146.754	723.562	115.231	1105.36	211.872	160.393	208.819
YDR034C-A	YDR034C-A	178.117	169.533	80.7305	114.834	159.142	80.7231	230.053	99.231	150.2	255.978
YDR040C	ENA1	148.503	179.642	354.813	219.092	287.157	165.229	297.215	211.121	251.744	307.329
YDR041W	RSM10	177.332	213.672	241.409	226.536	228.745	174.632	151.709	187.405	222.892	173.837
YDR042C	YDR042C	94.173	125.49	151.444	104.187	145.433	126.836	179.105	130.61	102.488	109.971
YDR044W	HEM13	97.6725	98.4081	119.495	88.8395	89.8498	80.9817	122.148	88.4541	128.543	83.961
YDR045C	RPC11	193.049	108.472	151.642	136.009	175.885	83.7409	145.693	109.273	191.758	134.036
YDR047W	HEM12	237.925	138.089	179.292	181.835	140.589	193.922	158.329	106.645	169.568	199.252
YDR049W	YDR049W	114.383	92.4653	98.296	93.9364	109.009	158.933	104.979	95.533	113.841	98.8816
YDR050C	TPI1	1667.68	1219.42	866.928	582.785	660.071	709.945	482.116	943.273	441.857	532.76
YDR051C	YDR051C	157.378	130.055	119.977	124.446	177.143	119.45	128.477	159.41	158.663	112.174
YDR052C	DBF4	164.861	96.5546	120.363	105.545	111.299	127.084	134.715	107.485	131.656	129.287
YDR054C	CDC34	200.708	174.146	180.227	252.382	140.549	185.238	250.221	189.814	201.981	215.15
YDR055W	PST1	322.338	330.662	389.563	231.279	294.192	130.775	302.343	182.079	189.223	194.424
YDR056C	YDR056C	218.199	231.867	235.215	187.531	197.401	138.451	180.928	194.123	190.699	166.749
YDR057W	YOS9	97.1367	109.288	111.108	120.457	99.8505	95.1552	124.593	126.358	140.108	115.02
YDR058C	TGL2	87.747	117.052	106.49	100.842	81.036	77.7543	106.521	132.019	173.609	112.512
YDR059C	UBC5	120.784	172.041	130.41	161.583	208.15	200.458	133.185	175.967	179.928	155.687
YDR060W	MAK21	176.92	75.8033	84.0536	99.1816	144.711	108.168	146.371	85.3397	137.913	118.056
YDR061W	YDR061W	140.181	138.701	161.939	148.692	145.053	125.448	137.747	156.914	127.294	199.893
YDR062W	LCB2	198.544	196.308	198.393	169.642	154.809	148.385	185.867	169.986	201.602	147.778
YDR064W	RPS13	1324.87	1104.27	734.31	768.179	687.088	683.924	480.675	794.782	691.538	524.401
YDR065W	YDR065W	205.318	204.553	162.99	156.762	228.142	135.205	171.609	173.895	148.945	110.62
YDR066C	YDR066C	189.433	182.932	183.796	159.497	171.797	152.595	128.54	162.487	135.137	182.928
YDR067C	OCA6	146.284	182.714	126.299	149.415	254.135	166.331	213.77	178.151	151.619	133.228
YDR068W	DOS2	122.38	139.102	132.266	159.651	192.241	159.101	182.371	149.349	157.649	147.941
YDR071C	PAA1	211.299	228.347	201.369	232.089	333.722	177.013	221.151	209.454	147.337	233.26
YDR072C	IPT1	308.369	240.581	258.034	289.379	186.963	208.923	237.235	236.496	199.934	226.437
YDR073W	SNF11	358.899	334.097	323.3	392.559	250.698	279.509	293.219	244.111	270.369	167.969
YDR075W	PPH3	107.958	86.8094	95.0042	91.8051	119.237	113.705	101.696	108.094	95.9029	99.7261
YDR076W	RAD55	223.977	247.243	241.719	307.49	237.143	246.836	231.569	296.759	234.951	213.247
YDR079C-A	TFB5	231.031	288.723	253.962	239.866	228.742	296.697	252.639	292.373	253.294	293.132
YDR079W	PET100	178.142	206.102	217.988	212.663	165.28	265.815	262.553	208.278	163.991	173.723
YDR081C	PDC2	118.726	112.207	105.932	97.2754	178.613	123.65	155.61	113.74	134.304	128.902
YDR082W	STN1	109.885	97.1852	87.169	99.2009	126.927	107.601	139.309	109.926	112.921	118.687
YDR083W	RRP8	148.564	101.354	85.3643	99.7125	137.169	115.528	116.141	104.65	124.861	103.663
YDR084C	TVP23	129.643	136.645	159.815	117.457	127.454	146.623	118.577	125.833	107.39	113.359
YDR086C	SSS1	388.37	426.075	179.964	287.65	246.132	313.175	318.914	252.488	333.595	181.859
YDR087C	RRP1	177.933	106.403	139.624	100.979	144.049	152.825	142.919	109.691	132.505	225.871
YDR088C	SLU7	96.3827	99.1337	91.2284	96.6612	118.666	116.759	133.317	122.967	110.53	128.718
YDR089W	YDR089W	143.773	127.801	86.3928	83.8796	140.432	95.7988	140.329	105.176	104.153	83.2501
YDR090C	YDR090C	111.34	121.877	130.934	125.089	141.395	196.74	149.644	162.842	180.766	173.789
YDR091C	RLI1	234.293	117.492	86.7677	117.792	186.748	137.083	135.87	118.47	153.831	161.276
YDR092W	UBC13	262.146	247.699	309.094	244.366	205.75	247.663	255.196	202.155	219.776	197.506
YDR093W	DNF2	133.761	92.1385	108.412	127.317	144.36	116.979	129.203	126.012	134.575	165.342
YDR096W	GIS1	141.576	144.72	147.327	145.155	137.067	103.752	143.049	127.964	109.884	119.604
YDR097C	MSH6	90.7328	48.1556	59.2725	53.9289	87.0995	71.706	94.6717	70.1408	88.5371	81.0108
YDR098C	GRX3	195.812	130.667	160.306	149.303	149.687	176.689	152.956	148.965	180.271	141.781
YDR099W	BMH2	328.509	419.146	337.962	487.931	297.543	338.322	363.949	446.084	297.959	385.865
YDR100W	TVP15	176.981	250.405	220.666	241.523	212.7	181.298	177.566	238.822	264.947	152.071
YDR101C	ARX1	165.388	87.7929	85.2853	103.301	116.003	140.61	109.485	104.191	144.307	146.533
YDR103W	STE5	141.938	120.705	111.52	118.156	138.09	140.894	139.209	138.68	165.465	153.053
YDR104C	SPO71	75.7308	74.8308	74.7559	77.1295	74.4859	66.8648	100.551	83.8096	97.3946	80.9629
YDR105C	TMS1	130.308	152.397	139.017	162.029	158.47	170.558	181.177	173.212	207.798	167.86
YDR106W	ARP10	134.865	160.837	109.099	123.683	125.2	168.794	167.487	154.541	181.84	208.449
YDR107C	YDR107C	109.325	125.382	106.57	109.779	107.559	118.136	143.513	142.426	125.275	154.183
YDR108W	GSG1	94.8134	95.4878	101.086	97.5105	100.082	133.637	132.356	118.506	122.837	138.093
YDR109C	YDR109C	85.6355	73.5364	96.7973	93.7548	88.4591	90.1142	118.413	123.263	104.575	88.7925
YDR110W	FOB1	132.241	97.029	85.8177	128.312	117.08	140.354	115.21	128.248	150.269	154.534
YDR111C	ALT2	117.956	72.5457	91.9527	145.927	69.9823	128.579	89.2769	151.44	104.633	92.4559
YDR113C	PDS1	139.526	124.488	91.0951	123.082	96.5507	81.4669	138.937	113.548	162.325	80.4527
YDR115W	YDR115W	233.681	210.239	259.95	195.195	165.421	219.829	189.798	214.119	198.571	220.065
YDR116C	MRPL1	181.622	160.548	184.219	177.852	142.228	169.749	179.91	126.419	169.974	152.352
YDR117C	TMA64	117.497	107.588	98.3061	101.287	124.668	130.404	128.008	115.73	112.74	104.324
YDR118W	APC4	122.98	104.563	106.707	95.0312	118.652	114.074	141.066	117.092	102.775	108.913
YDR119W	YDR119W	160.753	159.405	128.075	139.948	134.155	153.787	164.565	176.041	174.077	144.786
YDR120C	TRM1	117.945	101.911	77.9794	101.217	140.065	130.151	137.299	117.731	168.14	187.952
YDR121W	DPB4	109.047	82.6261	102.271	87.6461	87.8123	134.515	98.7081	127.943	96.1359	76.3588
YDR122W	KIN1	154.855	154.16	168.077	195.268	146.661	155.467	158.301	181.057	184.776	150.842
YDR123C	INO2	116.779	72.2258	89.3769	148.499	85.1984	150.218	121.119	99.4603	118.821	122.562
YDR124W	YDR124W	148.55	151.017	147.227	134.096	126.004	147.125	137.4	139.16	124.497	103.593
YDR125C	ECM18	93.7212	113.009	94.9922	101.253	112.285	74.3271	136.297	145.493	107.18	124.06
YDR128W	YDR128W	98.3125	87.6459	102.766	103.476	118.532	109.184	122.59	120.766	111.247	119.6
YDR129C	SAC6	219.377	229.369	261.046	252.487	184.242	200.096	201.958	236.148	191.306	222.691
YDR130C	FIN1	153.362	118.509	115.057	129.879	153.629	105.702	154.346	120.273	104.811	121.708
YDR131C	YDR131C	83.3144	87.6209	78.2724	72.3486	86.758	92.6205	86.1388	88.3973	78.971	87.5211
YDR135C	YCF1	192.247	223.386	195.306	228.606	194.699	172.517	200.386	199.571	205.454	215.164
YDR137W	RGP1	98.5328	92.7792	86.5282	95.1831	123.215	99.6981	150.727	111.71	128.586	117.394
YDR138W	HPR1	141.44	149.718	142.374	158.657	173.175	212.78	202.362	184.768	196.155	198.91
YDR139C	RUB1	186.141	162.348	155.111	134.779	153.68	143.073	176.682	177.561	157.558	219.717
YDR140W	MTQ2	207.289	159.601	155.874	195.212	152.987	159.516	155.123	140.995	194.239	220.124
YDR141C	DOP1	128.588	130.928	134.242	127.973	147.227	139.853	141.448	134.951	141.591	152.652
YDR142C	PEX7	114.18	123.68	161.747	119.296	119.42	137.231	163.092	135.753	136.523	114.608
YDR143C	SAN1	183.746	179.92	215.174	224.357	225.078	274.719	203.091	227.652	258.181	184.371
YDR144C	MKC7	160.47	100.73	97.0667	121.934	106.763	112.973	130.629	148.939	115.36	127.793
YDR145W	TAF12	162.831	124.639	151.83	149.892	134.998	153.655	175.93	154.941	144.465	138.24
YDR146C	SWI5	176.747	101.244	142.868	87.7707	151.223	127.648	155.327	110.809	112.398	115.783
YDR147W	EKI1	169.809	107.633	104.742	92.408	115.729	128.998	134.532	132.776	135.317	110.181
YDR148C	KGD2	144.571	161.728	146.74	159.627	113.883	148.318	185.279	147.666	163.267	142.459
YDR150W	NUM1	128.712	96.8477	95.5139	115.12	114.831	107.039	124.448	116.872	120.175	117.163
YDR151C	CTH1	243.72	232.806	235.516	261.301	196.013	295.576	248.877	213.248	203.901	224.073
YDR152W	GIR2	199.675	137.623	149.996	183.378	125.727	179.098	177.973	150.159	144.484	152.43
YDR155C	CPR1	991.189	1022.82	1093.81	1271.65	497.869	610.71	815.36	685.026	496.93	444.694
YDR156W	RPA14	359.069	338.295	233.794	416.103	265.58	441.136	301.795	268.763	284.333	289.733
YDR159W	SAC3	111.331	109.043	104.282	98.1285	114.03	129.476	134.725	119.182	120.757	120.474
YDR160W	SSY1	91.5608	92.6062	122.632	101.537	87.5572	100.11	114.352	98.4919	122.397	121.055
YDR161W	YDR161W	122.939	85.6181	87.0615	107.441	136.042	109.756	152.481	100.853	148.681	153.965
YDR162C	NBP2	115.627	142.048	154.626	150.115	144.973	171.158	147.307	164.445	159.456	136.162
YDR163W	CWC15	129.988	174.922	154.798	148.617	198.524	178.094	170.189	222.251	204.883	118.435
YDR164C	SEC1	89.4565	89.4389	104.431	95.8674	138.043	134.458	107.568	122.053	148.319	126.816
YDR165W	TRM82	196.391	114.203	90.6345	115.599	151.812	123.027	115.774	127.575	136.105	123.124
YDR166C	SEC5	120.32	109.259	86.4613	106.606	100.867	113.315	123.978	119.69	144.351	112.539
YDR167W	TAF10	136.985	123.586	133.301	152.118	116.641	113.902	115.857	118.518	121.686	120.75
YDR168W	CDC37	135.749	128.31	115.761	111.283	213.923	96.8825	135.942	159.555	129.962	133.06
YDR169C	STB3	142.473	159.45	179.921	180.494	153.136	143.156	204.506	181.888	190.895	158.44
YDR170C	SEC7	138.88	109.57	127.922	128.19	141.569	131.039	163.948	119.813	144.835	158.716
YDR171W	HSP42	214.644	307.921	541.805	379.447	252.152	260.359	365.667	264.545	232.25	260.27
YDR172W	SUP35	270.078	181.188	177.61	218.831	216.258	213.048	201.402	206.25	223.233	226.529
YDR173C	ARG82	209.199	177.463	150.957	195.613	182.072	176.924	224.17	190.409	171.219	175.966
YDR174W	HMO1	430.214	280.443	268.02	301.601	257.57	317.113	243.986	280.491	278.985	270.776
YDR175C	RSM24	155.872	142.196	159.785	140.477	139.749	133.66	138.15	156.844	178.622	166.863
YDR176W	NGG1	170.333	120.955	110.241	128.933	150.308	154.513	152.016	130.253	173.952	156.848
YDR177W	UBC1	238.965	180.958	184.85	210.413	188.491	223.125	290.306	157.36	187.927	206.98
YDR178W	SDH4	136.723	160.583	192.381	204.99	121.881	151.659	201.447	166.148	146.971	115.191
YDR179C	CSN9	96.3369	100.697	94.3721	90.586	92.8714	71.5083	168.054	88.3231	102.257	113.492
YDR179W-A	YDR179W-A	101.865	109.592	103.21	95.6335	120.209	180.22	123.407	135.499	128.792	158.876
YDR180W	SCC2	89.0536	55.963	64.749	57.7044	86.0664	81.1395	89.137	81.2662	75.7489	82.1706
YDR181C	SAS4	94.164	84.9849	110.928	88.4049	81.7848	119.792	111.776	99.986	136.926	109.44
YDR182W	CDC1	119.015	111.403	105.11	114.074	163.427	107.913	143.986	121.629	141.436	139.813
YDR183W	PLP1	94.6946	91.3368	93.1151	85.1819	82.085	100.245	119.603	98.6291	115.745	84.6756
YDR184C	ATC1	124.447	66.3534	59.6244	69.8652	82.0232	78.2619	75.9124	95.0594	118.119	59.091
YDR185C	YDR185C	157.604	141.575	133.691	205.336	137.268	206.241	112.659	123.822	138.644	98.062
YDR186C	YDR186C	210.15	280.311	292.957	338.611	277.328	343.666	299.39	345.399	276.05	270.728
YDR188W	CCT6	275.281	159.249	240.035	267.52	196.913	255.309	194.87	197.106	204.491	204.769
YDR189W	SLY1	153.414	111.778	112.427	128.266	158.226	126.833	142.094	131.651	135.686	136.732
YDR190C	RVB1	231.196	116.729	123.865	153.686	170.876	156.244	168.504	136.3	165.997	203.09
YDR191W	HST4	99.0377	91.1906	85.57	98.4245	103.209	107.937	112.383	112.596	100.607	117.872
YDR192C	NUP42	80.6728	87.0227	97.0999	120.825	103.161	94.8172	108.642	104.051	125.755	118.556
YDR194C	MSS116	217.24	198.476	155.938	160.026	218.018	140.551	171.099	175.824	182.038	230.88
YDR195W	REF2	179.552	172.982	149.725	158.152	152.868	161.631	193.31	157.588	185.502	202.774
YDR196C	YDR196C	140.636	156.663	129.684	136.33	111.454	132.912	142.779	142.625	159.147	128.346
YDR197W	CBS2	122.441	146.544	102.063	119.79	125.946	117.782	149.2	132.997	135.05	98.9818
YDR198C	RKM2	99.2826	104.03	121.188	98.7446	110.328	78.3878	158.344	116.878	127.731	97.9781
YDR200C	VPS64	87.4194	91.0336	94.6035	106.962	110.376	87.9359	115.923	102.02	119.404	99.2469
YDR201W	SPC19	115.506	143.174	137.498	150.144	134.042	119.675	149.972	145.768	147.398	64.6299
YDR202C	RAV2	110.919	155.612	118.562	133.585	114.257	127.226	128.154	154.495	143.502	120.43
YDR204W	COQ4	108.312	164.917	201.558	199.6	134.663	143.369	155.546	163.904	156.05	142.416
YDR205W	MSC2	118.271	126.78	114.223	121.124	121.422	121.602	149.506	126.869	164.373	123.217
YDR206W	EBS1	137.14	123.418	116.191	124.316	166.026	157.616	159.64	159.03	173.904	144.017
YDR207C	UME6	88.475	62.1776	78.8871	83.0646	84.2048	59.7111	103.039	61.0101	89.6832	76.5466
YDR208W	MSS4	197.947	164.845	159.385	185.502	162.104	156.101	179.375	186.216	186.101	258.066
YDR210W	YDR210W	236.516	213.242	312.818	209.517	147.899	155.662	175.017	210.596	157.536	104.938
YDR211W	GCD6	176.753	113.882	103.3	120.835	150.32	158.068	158.698	131.295	152.365	163.209
YDR212W	TCP1	191.298	119.874	121.958	144.662	160.201	136.435	155.259	118.456	138.671	220.583
YDR213W	UPC2	143.882	92.6856	177.757	140.204	139.932	168.971	134.974	109.657	131.008	161.043
YDR214W	AHA1	293.064	145.617	330.686	225.509	165.481	309.766	280.048	161.232	179.756	301.199
YDR216W	ADR1	191.257	81.2096	83.6331	109.754	137.471	114.107	144.256	88.2679	126.138	173.62
YDR217C	RAD9	87.1805	70.5531	72.0514	86.315	112.16	114.611	102.501	91.8977	127.693	127.978
YDR218C	SPR28	45.3751	43.9679	43.3158	44.6182	114.181	54.7613	105.922	57.4912	93.1532	158.158
YDR219C	MFB1	143.883	121.527	112.738	115.867	116.171	110.131	138.128	140.585	134.878	119.828
YDR221W	GTB1	175.24	117.047	123.384	161.315	149.406	148.301	137.146	152.113	162.44	126.894
YDR222W	YDR222W	260.958	174.41	161.009	219.422	182.726	145.631	154.644	210.938	180.793	117.098
YDR223W	CRF1	83.7889	120.844	93.7133	147.26	129.307	118.665	149.465	157.28	124.729	131.43
YDR226W	ADK1	382.316	339.288	285.494	325.998	225.827	330.081	220.245	368.946	163.803	235.318
YDR227W	SIR4	94.4773	75.1657	79.4448	92.6731	109.917	97.1657	112.589	94.4541	124.966	129.891
YDR228C	PCF11	178.084	144.354	114.835	128.688	152.237	128.358	159.778	177.653	159.633	180.291
YDR229W	IVY1	148.692	158.028	155.555	171.01	128.144	135.347	148.104	152.403	157.162	118.724
YDR231C	COX20	144.333	153.129	152.164	202.353	123.03	119.768	138.809	125.34	184.633	164.977
YDR232W	HEM1	204.45	173.322	221.851	217.265	212.604	211.552	222.326	213.707	204.701	238.555
YDR233C	RTN1	615.513	454.24	363.102	430.946	315.024	403.593	451.267	415.248	428.536	374.368
YDR234W	LYS4	125.129	163.645	181.588	224.906	214.636	432.154	235.982	237.631	254.367	234.169
YDR237W	MRPL7	139.253	129.124	113.847	129.976	160.53	138.834	141.99	158.473	141.576	105.793
YDR238C	SEC26	213.26	160.038	149.768	178.74	191.143	173.092	197.162	189.03	200.367	178.816
YDR239C	YDR239C	89.2089	78.3707	87.3459	81.6004	118.901	100.898	114.486	101.286	116.282	114.067
YDR240C	SNU56	115.203	100.334	92.2019	92.0934	108.598	104.072	127.396	104.905	118.931	136.236
YDR244W	PEX5	114.306	185.329	159.618	180.021	191.712	158.917	155.761	212.535	179.362	178.379
YDR245W	MNN10	210.483	152.577	141.635	156.004	175.227	204.425	176.026	168.466	152.906	202.483
YDR246W	TRS23	184.938	177.58	179.111	208.342	156.822	194.122	154.622	132.554	144.269	215.596
YDR247W	VHS1	131.542	178.937	173.434	191.601	140.997	162.067	169.702	156.675	175.165	133.254
YDR249C	YDR249C	121.102	167.198	109.539	130.092	150.393	156.902	167.584	146.59	153.712	105.557
YDR251W	PAM1	184.21	211.66	205.068	187.1	182.477	164.365	190.315	209.292	152.938	165.685
YDR252W	BTT1	139.806	172.471	186.427	129.751	130.16	101.179	172.472	145.607	137.978	94.097
YDR254W	CHL4	189.967	221.039	158.725	152.854	180.946	153.532	186.588	208.096	192.393	231.854
YDR255C	RMD5	164.292	203.327	173.042	160.587	299.993	169.591	165.846	162.606	178.237	149.035
YDR256C	CTA1	141.836	105.521	127.445	122.842	165.737	131.604	112.785	152.397	130.544	100.27
YDR257C	SET7	133.402	172.185	145.22	166.27	173.254	180.93	179.94	187.718	241.143	183.939
YDR259C	YAP6	81.423	89.2834	102.898	85.9567	113.669	111.222	120.389	92.9123	89.8964	78.4743
YDR260C	SWM1	188.832	174.514	218.177	247.37	199.217	245.548	226.591	204.465	209.004	211.717
YDR261C	EXG2	159.593	152.587	175.547	141.674	119.311	126.918	152.708	150.139	117.598	129.42
YDR262W	YDR262W	214.564	254.53	212.85	225.902	195.538	250.487	231.76	260.334	301.971	198.172
YDR263C	DIN7	100.758	105.089	119.165	110.904	113.41	71.0674	151.141	109.739	160.411	108.991
YDR264C	AKR1	156.918	162.148	181.405	199.898	150.562	260.975	192.933	197.403	198.121	230.118
YDR265W	PEX10	150.586	147.632	174.533	136.972	183.718	162.759	155.589	165.153	256.027	131.653
YDR266C	YDR266C	168.035	146.357	155.8	143.915	134.834	126.717	141.274	153.864	145.176	160.533
YDR267C	CIA1	116.034	91.5033	118.117	122.678	82.1383	107.379	120.68	104.254	115.451	94.7613
YDR268W	MSW1	144.564	98.0056	101.159	111.289	120.664	133.744	130.987	105.46	120.178	110.493
YDR270W	CCC2	114.253	104.136	113.04	108.07	180.747	126.717	133.99	117.225	168.38	116.041
YDR272W	GLO2	152.568	166.193	155.982	209.126	245.152	153.771	149.8	175.178	195.721	134.009
YDR273W	DON1	94.1345	83.6374	73.7196	133.509	108.292	77.2882	132.553	159.912	123.248	103.789
YDR275W	BSC2	327.632	174.176	211.406	250.41	196.54	268.865	255.978	199.284	167.427	232.774
YDR277C	MTH1	111.928	100.062	96.2812	135.51	88.3187	121.074	131.46	102.145	86.3844	68.4715
YDR279W	RNH202	108.905	82.6324	82.0295	79.942	214.439	95.1128	111.812	99.7205	85.3951	149.494
YDR280W	RRP45	186.575	117.403	165.435	143.568	143.229	216.987	251.37	167.138	203.895	229.107
YDR281C	PHM6	107.238	78.7719	84.689	75.5311	304.226	46.688	130.745	79.7378	78.1227	47.9471
YDR282C	YDR282C	72.0602	79.2583	83.8567	82.8428	93.4835	85.5791	127.009	116.394	100.776	81.8601
YDR283C	GCN2	106.443	130.928	116.308	105.615	142.274	108.567	137.779	137.353	155.604	161.953
YDR284C	DPP1	205.539	213.132	203.768	215.461	241.691	167.965	231.44	284.652	186.019	153.003
YDR285W	ZIP1	70.0182	75.8911	69.6354	65.2664	69.1765	45.707	85.1214	96.3853	85.1005	69.188
YDR286C	YDR286C	120.559	145.822	141.941	125.189	134.225	95.0957	181.319	119.119	156.085	75.6579
YDR287W	YDR287W	89.7632	109.106	103.123	117.247	139.415	98.7666	108.714	139.312	108.051	96.6828
YDR288W	NSE3	161.194	160.817	182.655	127.682	157.815	161.786	157.884	157.388	132.392	177.756
YDR289C	RTT103	108.072	114.377	110.683	97.8482	106.25	125.727	125.819	120.813	110.162	120.223
YDR291W	HRQ1	103.593	86.5717	97.7514	81.4002	120.911	77.4899	116.171	108.785	87.2747	80.0859
YDR292C	SRP101	135.348	120.009	128.491	115.358	117.536	111.468	156.878	138.532	136.891	121.012
YDR293C	SSD1	210.545	293.124	296.279	324.584	261.23	263.816	250.397	332.135	250.817	243.624
YDR294C	DPL1	142.237	145.313	183.067	158.75	202.904	130.609	153.694	172.847	149.82	177.845
YDR295C	HDA2	109.766	101.778	103.158	91.8386	146.819	83.4192	110.874	108.73	140.537	125.784
YDR296W	MHR1	200.673	168.374	178.719	230.577	146.232	165.987	260.373	162.287	170.576	138.577
YDR297W	SUR2	158.031	94.8139	115.743	133.566	192.227	141.96	128.834	93.772	103.745	153.379
YDR298C	ATP5	193.933	133.374	174.732	164.208	121.025	144.843	174.563	165.68	142.845	148.275
YDR299W	BFR2	159.937	60.2975	77.1664	80.3162	127.866	88.1237	120.948	80.3158	111.399	120.52
YDR300C	PRO1	140.731	97.9788	118.286	126	135.335	173.515	133.026	135.41	146.466	144.069
YDR301W	CFT1	115.984	136.755	149.944	130.098	176.059	139.579	168.49	162.797	170.322	147.817
YDR302W	GPI11	122.615	101.299	101.241	81.8929	102.624	85.955	114.932	128.868	115.663	98.745
YDR303C	RSC3	150.3	111.437	94.8303	102.246	151.518	104.669	140.631	130.566	145.277	121.776
YDR304C	CPR5	168.213	203.077	190.326	217.131	150.964	209.755	141.359	186.705	173.573	141.907
YDR305C	HNT2	251.357	296.451	232.202	277.93	201.26	191.401	227.547	267.535	225.582	187.489
YDR306C	YDR306C	112.902	123.363	118.405	133.241	131.248	142.831	140.564	128.132	186.851	182.525
YDR307W	YDR307W	113.932	107.118	115.288	100.029	104.627	104.933	124.487	110.439	100.441	110.229
YDR308C	SRB7	184.605	188.807	190.399	162.144	147.783	161.179	181.599	176.757	133.63	95.1134
YDR309C	GIC2	365.59	332.844	401.815	383.894	232.967	266.955	153.91	230.016	206.12	130.939
YDR310C	SUM1	161.305	117.359	114.667	156.598	150.599	144.503	152.764	135.851	119.438	138.564
YDR311W	TFB1	118.812	143.095	142.136	137.256	157.537	132.584	138.702	155.285	145.443	146.282
YDR312W	SSF2	100.29	79.2357	85.7974	95.9962	108.736	97.9828	155.702	101.851	174.02	113.34
YDR313C	PIB1	152.298	140.186	202.022	178.743	134.693	173.959	172.54	154.862	166.625	161.044
YDR314C	RAD34	115.455	123.5	142.726	98.9623	131.402	132.256	143.442	143.223	172.194	141.735
YDR315C	IPK1	122.479	114.058	95.0976	104.869	89.2839	114.472	133.067	133.582	101.444	104.773
YDR316W	OMS1	103.757	95.5867	90.6168	86.6652	102.824	96.4798	124.769	117.276	114.409	123.008
YDR317W	HIM1	97.6783	103.665	106.493	89.4893	121.477	112.838	121.532	99.1589	110.121	98.9732
YDR318W	MCM21	219.42	213.004	151.411	170.359	188.963	159.973	206.365	239.426	219.886	127.656
YDR319C	YDR319C	186.495	198.597	172.341	167.917	177.525	186.466	208.823	173.527	212.847	122.122
YDR320C	SWA2	109.944	101.469	115.038	108.74	116.41	115.304	126.519	122.585	117.109	100.338
YDR320C-A	DAD4	241.299	145.687	193.23	168.043	274.773	165.727	138.364	88.3717	138.745	110.892
YDR321W	ASP1	144.948	93.4858	78.1821	104.578	135.335	132.526	137.93	126.998	137.844	129.931
YDR322C-A	TIM11	238.025	276.987	263.629	207.409	399.765	197.283	214.796	231.987	278.132	309.66
YDR322W	MRPL35	131.878	152.174	138.516	132.146	176.97	109.776	160.256	149.762	149.412	142.297
YDR323C	PEP7	100.75	99.777	123.725	101.568	107.808	92.5413	129.813	105.36	108.524	112.85
YDR324C	UTP4	152.426	75.5424	74.9484	82.6669	101.726	99.5995	136.148	92.463	106.176	95.002
YDR325W	YCG1	105.962	72.3988	69.4657	86.3991	130.848	80.8504	111.738	95.439	100.531	112.391
YDR326C	YSP2	136.57	138.285	132.21	130.962	161.216	133.113	166.501	156.281	174.055	191.348
YDR328C	SKP1	129.825	139.538	197.606	207.416	129.881	121.03	170.469	195.884	170.151	104.279
YDR329C	PEX3	102.636	119.326	124.133	142.514	120.919	134.063	173.048	157.503	117.405	130.442
YDR330W	UBX5	94.3439	131.24	125.278	158.061	139.364	97.168	155.479	140.614	151.971	196.623
YDR331W	GPI8	162.766	141.064	138.459	139.21	154.362	135.657	156.713	164.545	152.121	168.565
YDR332W	IRC3	106.517	108.822	112.47	86.4573	152.263	123.527	164.671	122.097	125.416	112.652
YDR333C	YDR333C	160.987	137.759	126.942	135.42	200.241	160.093	182.079	159.371	188.8	136.672
YDR334W	SWR1	156.75	125.021	121.499	144.363	144.643	137.723	163.848	140.139	147.297	155.068
YDR335W	MSN5	148.86	139.361	142.673	143.563	156.513	148.521	164.283	159.176	138.204	141.215
YDR336W	YDR336W	166.609	145.211	150.848	147.032	134.687	127.613	148.802	139.354	141.402	132.225
YDR337W	MRPS28	144.067	135.176	140.433	158.495	128.796	132.938	171.533	172.556	159.623	126.502
YDR338C	YDR338C	96.1509	102.398	136.289	126.078	133.341	111.108	144.547	139.947	114.314	124.925
YDR339C	FCF1	197.781	136.624	113.995	148.014	133.272	156.679	177.477	134.936	147.113	138.817
YDR343C	HXT6	196.334	146.453	114.882	118.602	189.461	137.865	229.615	143.159	145.543	116.51
YDR345C	HXT3	389.933	146.217	544.174	366.419	217.826	452.04	476.156	254.1	316.52	745.054
YDR346C	SVF1	220.573	123.397	118.439	165.492	162.308	205.933	194.357	161.77	194.255	163.495
YDR347W	MRP1	218.168	173.273	164.72	200.416	182.022	220.076	250.372	206.075	223.63	257.209
YDR348C	YDR348C	159.667	105.258	120.367	146.419	138.747	175.359	132.752	141.655	147.053	116.728
YDR349C	YPS7	150.12	123.857	147.466	164.121	192.989	186.584	202.646	154.826	188.463	243.805
YDR350C	TCM10	129.609	151.321	139.307	124.133	148.972	144.663	171.236	171.522	187.051	155.608
YDR351W	SBE2	150.22	153.977	117.285	150.789	191.475	147.513	155.867	165.457	203.394	184.195
YDR352W	YDR352W	215.727	230.593	264.883	267.495	178.797	200.087	225.387	260.666	212.172	252.035
YDR353W	TRR1	335.95	493.648	581.877	540.471	465.039	478.317	323.554	533.063	368.33	263.048
YDR356W	SPC110	102.724	79.1722	87.0366	77.2611	126.952	95.196	113.354	98.3588	112.753	127.633
YDR357C	YDR357C	287.161	227.966	188.664	193.267	222.579	230.413	243.322	206.186	243.799	231.697
YDR358W	GGA1	127.415	191.175	177.999	201.87	197.975	111.224	191.359	184.449	180.054	136.672
YDR359C	VID21	146.027	136.178	144.267	167.38	173.089	145.352	183.934	150.352	194.816	189.135
YDR361C	BCP1	186.144	109.376	102.906	120.167	197.819	125.045	180.237	104.845	152.843	117.522
YDR362C	TFC6	123.356	107.499	111.989	113.047	156.426	99.1863	134.159	120.684	139.32	148.248
YDR363W	ESC2	98.5475	98.8482	105.602	102.34	110.877	101.682	106.596	110.886	117.86	94.2146
YDR363W-A	SEM1	364.586	253.7	259.683	230.187	171.814	264.282	250.187	137.721	283.411	264.783
YDR364C	CDC40	141.898	109.774	110.611	117.904	131.106	144.125	113.014	133.67	119.831	139.185
YDR365C	ESF1	288.593	140.971	272.568	94.7432	147.811	120.421	142.013	110.086	158.623	107.272
YDR367W	YDR367W	102.899	134.332	120.057	99.562	131.162	85.0708	140.669	141.822	138.657	127.359
YDR368W	YPR1	130.528	174.048	165.411	179.645	177.176	92.3	169.993	163.675	210.103	236.702
YDR369C	XRS2	72.0525	80.5662	96.3279	83.7423	112.612	74.7705	103.279	95.2371	100.887	87.3762
YDR370C	YDR370C	126.816	134.968	109.927	118.404	180.606	118.284	168.27	170.654	151.601	206.826
YDR372C	VPS74	175.69	259.405	228.259	220.065	268.911	199.284	256.097	238.33	229.667	194.26
YDR374W-A	YDR374W-A	155.459	184.903	175.604	165.92	158.933	141.767	162.595	183.457	171.85	192.231
YDR375C	BCS1	134.312	166.291	123.884	179.06	162.726	158.086	219.866	178.248	192.779	199.566
YDR376W	ARH1	104.302	130.89	103.393	126.649	151.382	107.003	196.078	134.394	124.174	135.754
YDR377W	ATP17	326.713	283.043	265.895	268.286	160.714	240.322	280.332	305.159	263.502	206.303
YDR378C	LSM6	411.181	318.883	293.956	303.39	244.834	224.1	329.46	317.244	302.362	294.514
YDR379W	RGA2	112.667	150.206	136.39	152.459	163.763	144.991	162.022	146.484	154.163	139.97
YDR381W	YRA1	1155.06	1036.39	885.644	695.49	963.817	875.048	1238.65	1052.05	1233.32	1071.38
YDR382W	RPP2B	1013.07	712.57	466.888	701.329	497.312	447.334	359.943	480.213	428.524	464.234
YDR383C	NKP1	434.646	386.211	263.193	274.762	292.632	295.704	267.167	298.167	288.346	323.69
YDR385W	EFT2	721.72	496.266	500.714	531.165	409.694	459.198	345.727	436.595	422.515	400.215
YDR387C	YDR387C	109.113	129.753	129.629	154.503	104.929	121.767	133.634	144.9	134.355	201.461
YDR388W	RVS167	159.64	180.062	215.47	244.878	217.783	163.489	183.75	183.769	178.531	152.313
YDR389W	SAC7	179.382	148.226	152.942	159.639	139.631	204.354	172.336	175.302	174.511	142.458
YDR390C	UBA2	131.475	108.636	89.1049	110.554	172.605	132.809	136.221	114.619	146.602	118.945
YDR391C	YDR391C	112.557	156.508	133.519	135.971	117.931	138.629	108.655	126.467	151.354	138.951
YDR392W	SPT3	106.185	107.817	121.826	120.211	118.922	99.6196	121.81	118.823	112.511	127.556
YDR393W	SHE9	213.149	176.149	146.433	161.783	152.09	186.835	165.842	191.815	171.046	155.868
YDR394W	RPT3	213.761	137.187	160.372	191.783	139.851	194.036	168.326	177.239	159.85	169.585
YDR395W	SXM1	176.859	112.063	93.9084	113.383	172.677	136.55	148.938	121.54	143.155	191.704
YDR397C	NCB2	218.035	149.387	158.721	162.299	150.542	171.438	173.596	164.455	168.615	200.022
YDR398W	UTP5	164.324	68.5964	76.1432	104.384	109.368	105.723	102.057	94.4998	119.895	103.618
YDR399W	HPT1	401.954	134.237	138.648	146.854	119.976	224.374	149.614	121.876	194.08	163.511
YDR402C	DIT2	49.528	53.1273	69.5863	46.7452	83.4482	46.4353	92.2112	73.8224	68.9378	95.3471
YDR403W	DIT1	58.9398	68.3436	93.5139	59.2646	82.747	51.4458	105.056	90.1591	122.786	56.823
YDR404C	RPB7	231.983	217.866	194.871	192.225	172.499	181.723	206.106	195.504	242.404	212.745
YDR405W	MRP20	196.709	219.485	204.462	208.262	138.618	161.926	167.167	171.789	276.747	156.178
YDR406W	PDR15	110.516	126.115	140.426	131.25	119.566	132.51	154.173	130.061	137.959	157.346
YDR407C	TRS120	127.532	123.405	112.476	117.051	148.391	136.632	150.849	149.114	160.392	142.301
YDR408C	ADE8	254.477	287.291	317.709	414.244	225.035	360.386	250.054	347.024	292.495	205.09
YDR409W	SIZ1	124.108	122.614	105.666	128.299	127.314	127.144	145.916	129.017	132.714	192.383
YDR410C	STE14	256.477	280.27	201.709	172.253	259.019	177.934	230.49	229.112	184.204	154.462
YDR411C	DFM1	195.816	204.968	206.542	224.55	167.033	157.369	201.122	174.873	170.423	203.856
YDR412W	RRP17	145.475	106.99	73.4352	126.727	132.268	103.93	132.146	115.475	119.087	220.595
YDR414C	ERD1	137.349	135.659	100.314	121.159	105.959	161.473	165.548	155.672	150.948	125.058
YDR415C	YDR415C	152.087	173.42	141.049	151.251	114.477	171.907	152.976	203.507	141.089	123.529
YDR416W	SYF1	183.788	151.377	117.796	129.507	124.887	121.126	114.068	138.745	100.987	116.616
YDR418W	RPL12B	1023.35	861.704	637.304	675.197	483.953	478.033	455.729	676.544	443.619	421.146
YDR419W	RAD30	85.9382	86.4557	76.7777	88.2527	131.266	85.8564	115.058	94.3809	98.1276	147.897
YDR420W	HKR1	130.706	129.679	123.934	145.043	133.348	121.42	113.706	150.006	138.485	160.362
YDR421W	ARO80	85.0611	109.628	108.878	113.156	113.542	97.1091	110.58	109.574	118.269	120.904
YDR422C	SIP1	147.021	161.073	150.455	168.922	200.399	139.777	189.464	177.019	194.094	183.541
YDR423C	CAD1	178.51	198.304	187.901	202.308	168.034	197.831	163.568	222.236	150.403	252.933
YDR424C	DYN2	336.625	348.442	316.607	249.004	184.352	261.784	243.283	247.645	231.968	247.323
YDR427W	RPN9	251.662	204.851	166.724	146.744	193.722	183.108	194.426	190.396	192.162	173.25
YDR429C	TIF35	259.7	188.414	150.631	202.487	163.926	173.084	167.707	176.388	170.211	190.36
YDR430C	CYM1	132.542	143.178	139.111	146.497	103.327	94.9589	140.518	142.943	127.971	129.653
YDR432W	NPL3	462.317	328.424	319.413	369.059	210.613	321.52	302.771	330.138	369.034	420.443
YDR434W	GPI17	106.423	112.429	116.887	110.475	170.066	111.156	132.038	146.455	131.758	161.294
YDR435C	PPM1	81.3144	93.4869	127.374	107.928	184.984	101.591	117.479	98.8078	125.778	97.2214
YDR436W	PPZ2	88.8831	99.2284	124.361	140.276	107.843	103.513	115.334	118.231	140.745	91.1287
YDR437W	GPI19	125.269	121.711	158.317	122.173	79.0134	121.503	147.553	108.714	292.705	91.0395
YDR438W	THI74	176.047	153.222	171.107	143.345	111.821	178.515	136.325	142.896	157.08	141.238
YDR439W	LRS4	124.993	108.498	113.978	114.458	124.41	127.416	137.278	117.09	148.494	201.208
YDR440W	DOT1	91.9917	62.8215	99.6198	68.8404	116.537	103.29	117.517	77.379	94.2986	94.0929
YDR441C	APT2	164.944	98.5595	129.348	99.9956	198.571	142.399	183.745	132.915	217.586	159.503
YDR443C	SSN2	82.4067	83.2101	82.1867	97.6756	90.5675	91.2906	106.767	106.423	100.955	83.1715
YDR444W	YDR444W	124.856	79.9685	89.4977	98.8057	95.6546	88.5618	117.82	95.5364	129.639	106.457
YDR446W	ECM11	150.237	138.14	125.898	93.2814	140.053	103.452	105.709	146.635	102.755	85.063
YDR447C	RPS17B	743.575	552.351	347.543	417.597	464.947	385.701	302.911	381.59	375.35	276.772
YDR448W	ADA2	200.211	144.307	147.641	139.98	144.688	121.65	132.458	102.211	131.881	138.057
YDR449C	UTP6	188.3	105.368	86.9151	95.0198	139.994	115.589	133.087	112.536	136.377	93.8937
YDR450W	RPS18A	745.198	636.219	403.942	442.447	374.476	402.282	343.795	504.274	381.174	274.44
YDR451C	YHP1	341.45	316.838	316.027	208.678	246.387	183.543	217.951	292.021	214.979	131.94
YDR452W	PPN1	156.882	201.698	165.05	194.248	242.031	179.065	165.106	191.918	148	144.089
YDR453C	TSA2	153.732	210.731	201.443	187.586	196.442	117.487	162.588	184.32	245.019	165.118
YDR454C	GUK1	204.489	173.771	172.698	155.763	153.644	149.959	214.268	180.378	161.923	289.763
YDR456W	NHX1	129.348	127.271	134.623	128.072	175.652	159.251	169.558	141.905	144.544	136.075
YDR457W	TOM1	131.178	120.76	121.609	122.514	143.429	124.701	134.324	131.127	153.427	142.685
YDR458C	HEH2	131.193	133.704	121.768	120.84	148.454	123.898	118.341	116.199	107.069	129.649
YDR459C	PFA5	140.527	143.075	140.876	138.321	156.301	113.884	150.059	141.19	120.797	168.209
YDR460W	TFB3	253.881	373.76	178.415	162.933	124.169	168.722	136.142	156.764	123.413	120.094
YDR462W	MRPL28	219.23	221.226	208.181	281.972	159.223	232.196	191.389	299.707	239.763	161.059
YDR463W	STP1	170.887	202.833	195.133	239.98	255.215	229.971	212.842	253.968	244.146	174.813
YDR464W	SPP41	101.541	69.9745	85.9349	80.9337	104.85	98.0417	138.29	95.7542	126.959	128.676
YDR465C	RMT2	102.619	54.8066	51.7897	79.7557	89.8384	91.0267	100.938	87.4615	150.205	109.703
YDR466W	PKH3	157.519	160.192	124.941	160.023	160.058	126.267	160.461	149.74	185.544	135.276
YDR468C	TLG1	221.209	228.443	178.549	199.315	169.909	215.03	246.185	214.732	176.091	138.906
YDR469W	SDC1	173.944	176.056	157.272	150.049	148.792	198.861	116.201	154.57	191.317	173.02
YDR470C	UGO1	140.064	140.663	114.705	125.384	129.787	133.246	134.811	153.965	153.691	137.14
YDR471W	RPL27B	831.65	758.566	512.881	514.935	497.099	399.408	331.716	556.686	385.085	343.102
YDR472W	TRS31	196.236	182.057	181.289	163.955	157.68	175.49	179.244	173.916	147.143	163.379
YDR473C	PRP3	96.7882	104.853	98.3304	106.223	102.236	139.925	108.322	123.14	88.5668	134.734
YDR475C	JIP4	172.457	226.202	233.053	213.468	193.879	169.842	132.442	213.708	160.447	166.181
YDR476C	YDR476C	225.28	306.664	453.845	575.856	217.955	391.368	216.425	423.516	256.654	251.285
YDR477W	SNF1	162.262	182.335	156.243	209.857	170.396	192.681	199.169	216.195	184.864	139.915
YDR478W	SNM1	159.762	182.523	154.463	178.591	145.142	151.91	145.414	197.584	175.994	120.992
YDR479C	PEX29	189.532	198.927	187.151	202.063	186.153	190.017	173.596	235.575	215.223	215.455
YDR480W	DIG2	113.705	156.512	154.03	136.098	201.385	152.924	148.672	172.144	161.517	124.855
YDR483W	KRE2	178.312	201.229	189.122	179.416	148.563	169.546	154.104	154.656	150.931	150.693
YDR484W	VPS52	107.157	131.538	92.4672	94.9477	100.79	103.038	176.448	109.482	129.467	142.096
YDR485C	VPS72	115.227	106.165	111.28	101.164	110.195	113.157	135.359	135.827	105.67	95.3842
YDR486C	VPS60	188.935	251.686	201.356	246.5	250.146	248.723	200.897	255.543	194.494	160.126
YDR488C	PAC11	64.5982	44.2596	83.0411	77.5483	71.1153	55.0101	74.7452	56.7518	64.6226	96.0109
YDR489W	SLD5	165.726	149.221	124.413	148.817	207.074	147.378	163.748	172.461	180.851	139.826
YDR490C	PKH1	134.357	129.566	155.789	192.738	150.238	119.879	137.942	162.333	156.788	130.396
YDR492W	IZH1	142.316	105.268	96.0644	125.065	103.08	230.523	130.389	126.713	103.836	265.093
YDR493W	FMP36	197.353	245.029	246.986	235.54	192.944	222.946	236.963	211.129	230.802	260.851
YDR494W	RSM28	143.618	162.13	132.896	151.983	193.68	118.008	154.431	169.102	162.619	165.728
YDR495C	VPS3	91.3368	94.9746	92.2447	75.1159	118.071	73.2913	134.459	88.2228	130.489	127.63
YDR496C	PUF6	179.456	74.3437	74.2268	81.6547	103.368	96.6398	102.205	83.4222	107.365	99.0886
YDR497C	ITR1	811.785	162.523	307.544	205.693	273.681	281.269	243.359	219.409	232.148	385.973
YDR498C	SEC20	268.877	145.627	152.333	175.326	265.336	167.488	174.22	160.559	155.425	178.005
YDR499W	LCD1	171.459	136.032	112.33	116.741	127.246	109.473	151.835	130.265	136.241	129.874
YDR500C	RPL37B	749.471	667.44	518.03	491.141	547.233	369.08	363.998	560.601	432.187	345.623
YDR501W	PLM2	94.4324	70.4196	81.7781	58.769	70.823	83.4442	90.6503	74.8342	97.1401	67.1173
YDR502C	SAM2	306.619	163.503	112.28	94.3009	91.1856	165.271	81.6536	136.691	130.407	132.854
YDR503C	LPP1	154.755	124.465	114.233	105.344	129.113	170.795	125.413	154.168	167.474	132.449
YDR505C	PSP1	158.658	190.48	168.806	175.898	127.032	196.347	155.196	212.769	148.064	133.855
YDR506C	YDR506C	104.198	79.1601	119.655	127.051	100.443	109.806	135.342	108.233	107.885	145.816
YDR507C	GIN4	154.41	82.5101	85.9427	83.7336	85.8801	109.823	110.659	110.387	112.686	109.542
YDR508C	GNP1	587.789	358.354	352.646	408.881	438.363	276.05	319.364	413.981	426.816	293.323
YDR510W	SMT3	388.699	285.371	268.517	338.933	204.948	304.35	291.964	251.526	284.772	272.137
YDR511W	ACN9	273.265	320.792	299.322	318.87	223.455	341.16	193.009	300.049	239.265	166.75
YDR512C	EMI1	227.706	282.069	281.124	267.912	164.449	184.013	229.668	226.071	209.741	198.141
YDR514C	YDR514C	136.553	129.809	112.504	127.687	139.86	116.163	122.21	131.277	127.148	108.026
YDR515W	SLF1	113.331	76.8137	78.0176	69.1127	87.5298	78.4597	110.954	74.9614	94.7522	81.6739
YDR516C	EMI2	123.165	170.389	221.45	193.554	123.776	146.051	194.045	160.474	139.2	122.688
YDR517W	GRH1	178.517	122.224	191.923	205.219	92.6234	178.799	151.574	165.309	128.023	172.226
YDR518W	EUG1	104.792	125.448	128.56	115.979	136.316	110.277	131.379	165.964	148.091	117.295
YDR519W	FPR2	193.621	160.529	171.127	176.76	127.284	145.941	153.153	170.053	163.494	272.106
YDR520C	YDR520C	126.195	104.3	95.323	101.022	149	135.974	140.813	128.518	153.74	171.426
YDR522C	SPS2	64.1262	62.4771	68.8975	72.8801	84.931	75.3712	111.138	92.7539	99.5725	85.9671
YDR523C	SPS1	47.3789	52.9586	53.9648	68.027	71.3505	63.9227	77.551	98.8103	67.1959	94.6966
YDR524C	AGE1	191.272	166.192	138.402	168.537	136.145	203.59	170.625	194.553	201.077	254.88
YDR524C-B	YDR524C-B	3082.66	3033.37	2790.34	3010.03	2603.06	2398.83	2688.23	2232.7	2465.59	2119.29
YDR525W-A	SNA2	351.337	462.956	439.876	635.895	428.936	531.739	431.175	491.148	462.15	581.96
YDR527W	RBA50	269.904	216.94	193.254	291.758	206.966	257.065	227.217	284.783	281.683	238.702
YDR528W	HLR1	271.007	148.227	174.577	140.953	153.983	158.984	210.951	187.424	181.814	139.8
YDR529C	QCR7	305.703	296.438	343.064	352.527	227.786	320.217	237.887	337.715	310.127	260.414
YDR530C	APA2	139.785	164.488	152.669	289.96	122.565	264.689	219.881	211.449	196.445	152.218
YDR532C	YDR532C	109.978	133.505	98.2002	108.775	133.408	149.531	151.89	136.604	147.827	103.651
YDR534C	FIT1	47.4763	49.0481	77.4561	88.2493	81.1555	63.9152	82.2315	67.6469	85.5609	63.8039
YDR536W	STL1	88.6083	76.4072	101.241	98.6965	138.495	105.009	135.496	109.486	136.028	121.763
YDR538W	PAD1	107.705	102.557	107.665	104.994	102.688	113.759	148.823	158.208	117.018	104.852
YDR539W	YDR539W	91.1371	96.0135	151.718	105.013	147.04	109.694	148.48	132.028	134.795	155.119
YDR541C	YDR541C	84.057	92.2278	109.534	97.4793	127.297	114.641	114.767	114.451	115.339	168.703
YEL001C	YEL001C	193.911	183.46	157.584	181.799	155.684	181.541	243.553	180.805	183.506	156.601
YEL002C	WBP1	197.411	165.152	163.903	153.238	198.945	155.507	173.097	166.426	171.565	167.974
YEL003W	GIM4	269.211	208.017	133.4	147.45	187.746	155.645	158.055	156.397	173.273	185.359
YEL004W	YEA4	142.667	133.797	116.267	93.773	92.418	129.857	124.647	119.466	107.07	130.998
YEL005C	VAB2	118.582	171.391	136.006	117.283	86.4687	132.504	102.918	175.707	105.67	74.2381
YEL006W	YEA6	191.939	180.47	150.598	157.323	180.324	192.245	174.531	180.217	188.714	155.715
YEL007W	YEL007W	416.899	278.108	244.92	261.474	241.467	228.76	232.748	238.286	197.085	154.7
YEL009C	GCN4	1222.28	937.013	879.238	813.335	1200.84	3413.18	721.972	975.255	932.338	1061.94
YEL011W	GLC3	147.086	215.314	207.337	265.608	162.866	153.704	192.744	223.7	194.832	171.327
YEL012W	UBC8	110.097	136.976	130.902	180.359	120.448	114.126	167.04	123.942	141.542	112.635
YEL013W	VAC8	201.864	224.282	200.034	215.402	209.735	214.044	229.827	225.556	232.569	215.235
YEL015W	EDC3	187.083	137.646	136.085	187.042	213.256	162.539	171.118	154.207	185.272	183.3
YEL016C	NPP2	143.469	117.195	128.689	177.988	146.879	127.94	126.898	144.795	155.292	183.216
YEL017W	GTT3	216.955	178.016	190.22	269.484	207.558	186.245	194.381	192.386	212.463	149.988
YEL018W	EAF5	281.219	228.234	236.233	279.916	143.277	185.811	211.612	224.639	207.408	155.049
YEL019C	MMS21	77.2589	63.6748	74.2891	59.3268	72.8399	43.2197	78.3519	70.7959	98.0486	79.9627
YEL020C	YEL020C	78.7527	79.2123	89.8825	109.961	86.1745	77.2496	137.44	89.2312	93.2426	115.07
YEL020W-A	TIM9	448.712	393.911	348.465	472.789	236.935	256.717	298.788	333.178	316.26	721.439
YEL022W	GEA2	124.086	97.4654	87.0582	98.0934	123.611	101.385	138.505	118.347	137.191	148.938
YEL023C	YEL023C	82.5374	92.5719	86.3303	91.5736	118.31	80.3322	129.264	107.215	106.504	86.37
YEL024W	RIP1	182.885	159.667	187.278	191.136	129.439	170.002	167.249	153.753	151.964	208.001
YEL025C	YEL025C	153.95	146.508	135.532	152.472	171.589	166.971	152.46	158.3	165.125	135.624
YEL026W	SNU13	603.289	290.918	243.1	301.399	348.694	379.702	338.319	318.093	366.388	352.66
YEL027W	CUP5	584.195	451.157	429.612	444.757	350.673	447.226	340.897	324.179	349.367	373.124
YEL029C	BUD16	126.419	158.987	109.208	131.035	139.936	197.884	144.943	190.438	164.105	197.327
YEL030W	ECM10	82.4897	75.9124	81.5285	77.7315	148.521	71.9559	96.9041	91.3402	104.25	103.373
YEL031W	SPF1	197.245	114.557	153.122	139.588	161.536	192.65	182.068	157.142	173.567	176.9
YEL032W	MCM3	169.123	120.871	144.156	160.141	151.113	178.318	139.927	164.084	175.356	156.411
YEL034W	HYP2	1843.43	760.456	621.267	880.103	672.005	583.702	559.871	577.891	502.014	496.245
YEL036C	ANP1	189.875	124.218	133.276	192.479	137.434	170.59	176.323	151.841	125.423	198.268
YEL037C	RAD23	162.644	86.688	112.285	160.428	119.47	144.808	155.455	104.06	120.568	139.377
YEL038W	UTR4	94.1538	89.864	102.879	146.033	133.418	112.277	114.084	143.498	131.63	132.089
YEL039C	CYC7	324.595	448.852	465.974	172.261	502.954	154.362	502.016	247.744	256.332	311.635
YEL040W	UTR2	596.061	661.544	773.233	212.642	708.611	255.687	716.359	347.641	296.155	483.02
YEL041W	YEF1	88.3136	85.7236	128.299	82.2941	87.2808	87.5928	111.859	100.545	86.562	126.146
YEL042W	GDA1	160.501	86.8949	98.132	104.646	154.764	124.908	170.323	115.591	168.016	135.347
YEL043W	YEL043W	138.33	113.809	159.568	147.697	124.07	144.485	152.506	126.873	145.553	127.035
YEL044W	IES6	179.119	129.464	253.244	437.786	342.764	427.638	156.451	262.665	244.689	295.201
YEL046C	GLY1	867.988	768.261	1188.63	1393.37	1392.36	1215.91	949.116	847.835	763.545	759.972
YEL048C	YEL048C	153.28	119.852	120.308	86.8343	161.957	123.696	144.673	115.267	115.069	147.55
YEL049W	PAU2	99.7554	71.2644	78.1825	97.5528	88.0535	90.2771	104.52	121.622	88.1023	83.5417
YEL050C	RML2	145.297	131.717	135.664	162.796	134.896	152.435	128.154	138.138	113.959	131.873
YEL051W	VMA8	303.347	244.993	201.802	236.84	259.467	231.966	228.769	271.936	282.266	178.38
YEL052W	AFG1	121.867	147.797	145.577	182.405	165.248	180.578	123.251	167.953	154.523	266.629
YEL053C	MAK10	99.2049	100.257	79.7489	89.164	140.891	114.065	112.949	118.624	131.452	123.186
YEL054C	RPL12A	1006.46	778.951	505.341	551.652	406.778	386.104	337.788	606.441	474.389	418.404
YEL055C	POL5	189.928	123	113.17	137.059	184.749	126.813	135.644	139.121	165.816	171.1
YEL056W	HAT2	205.498	159.611	169.843	176.021	174.432	174.138	192.526	199.687	156.941	178.633
YEL057C	YEL057C	134.355	128.997	93.0384	121.489	112.721	100.515	129.872	128.721	133.36	111.945
YEL058W	PCM1	119.535	122.127	137.861	175.631	133.87	143.807	112.337	139.045	192.032	176.951
YEL059C-A	SOM1	87.6918	115.69	100.418	133.196	87.6376	108.438	65.6282	106.663	147.986	158.341
YEL061C	CIN8	140.12	77.6598	91.8781	78.5027	144.116	87.8992	114.997	91.1209	124.464	139.647
YEL062W	NPR2	112.312	141.922	130.498	106.975	130.299	107.51	152.66	120.77	132.721	119.389
YEL064C	AVT2	87.4213	102.892	101.196	82.1748	129.255	98.1366	124.478	136.44	139.893	177.88
YEL065W	SIT1	85.9616	70.0566	86.7089	75.906	100.048	81.5939	114.589	70.7031	110.423	159.247
YEL066W	HPA3	82.6573	77.0903	79.2529	116.569	83.1385	79.0444	92.8636	107.567	87.6696	97.5679
YEL072W	RMD6	116.645	125.273	118.168	115.05	121.042	142.372	154.564	144.861	117.47	211.902
YER001W	MNN1	278.817	189.852	197.192	113.947	214.062	132.995	183.89	107.593	115.549	133.257
YER002W	NOP16	197.774	106.499	102.033	127.653	126.637	105.594	175.678	107.397	109.379	135.779
YER003C	PMI40	165.993	80.3253	93.3434	69.8268	99.6513	97.104	132.033	92.9023	115.297	126.616
YER004W	FMP52	184.427	102.268	132.851	177.748	130.928	201.753	145.337	133.422	130.565	148.822
YER005W	YND1	176.631	152.361	138.171	172.525	148.838	188.748	164.996	136.657	181.248	202.977
YER006W	NUG1	158.604	80.3397	88.8541	120.518	125.761	144.874	123.183	116.205	156.564	193.35
YER007C-A	TMA20	205.127	180.836	135.611	152.559	157.049	193.039	184.367	197.088	177.678	163.92
YER008C	SEC3	133.522	121.073	130.933	130.146	127.063	122.079	162.52	136.153	137.793	158.86
YER009W	NTF2	289.805	244.947	206.649	211.961	189.863	298.248	291.666	231.445	215.954	226.573
YER010C	YER010C	149.149	151.074	201.817	126.453	143.592	161.052	207.799	143.655	154.973	176.159
YER011W	TIR1	43.0639	47.3321	83.9521	53.6847	88.3722	56.8418	74.8291	68.6571	59.101	63.187
YER012W	PRE1	371.274	186.304	179.983	224.956	155.278	302.575	216.621	172.823	169.412	235.003
YER013W	PRP22	94.7389	78.7443	88.6082	91.4163	105.521	94.5021	134.45	89.4768	114.955	129.982
YER014W	HEM14	67.9989	75.8941	97.0658	90.4976	130.04	54.8823	101.322	89.4413	101.323	110.651
YER015W	FAA2	69.8397	66.8088	68.8171	68.7772	76.5754	76.7285	113.682	78.8688	108.333	79.9961
YER016W	BIM1	140.828	123.213	116.85	136.99	153.317	112.725	188.654	119.542	129.65	177.673
YER017C	AFG3	157.272	141.544	148.986	200.37	198.655	159.937	206.036	191.344	219.646	179.672
YER018C	SPC25	191.442	118.162	195.551	227.884	127.432	181.516	195.211	105.308	207.941	253.178
YER019C-A	SBH2	588.654	439.329	489.406	469.592	418.439	430.277	369.134	347.226	333.477	452.8
YER019W	ISC1	245.323	187.669	235.299	276.855	166.004	199.335	204.58	188.223	276.395	176.532
YER021W	RPN3	282.836	204.223	186.459	187.054	188.14	224.538	197.64	207.754	186.758	251.049
YER022W	SRB4	112.259	109.453	111.764	105.196	120.139	109.385	124.476	102.265	137.75	101.311
YER023W	PRO3	182.926	256.316	300.062	344.744	224.702	350.443	219.788	361.756	293.971	280.512
YER025W	GCD11	278.54	184.726	211.468	263.218	230.118	232.807	200.413	280.117	261.154	189.791
YER026C	CHO1	476.056	225.999	192.44	202.401	267.104	210.023	258.334	205.677	218.639	174.121
YER027C	GAL83	122.739	117.805	134.816	164.265	113.787	138.709	149.676	127.253	146.749	147.566
YER028C	MIG3	121.855	141.72	129.537	127.441	138.093	79.8958	156.81	145.627	141.726	143.585
YER029C	SMB1	152.466	162.294	204.021	264.768	146.198	185.15	168.085	248.338	235.821	208.031
YER030W	CHZ1	170.33	167.364	162.137	168.274	170.576	175.047	158.643	171.1	156.38	157.494
YER031C	YPT31	188.516	187.717	196.251	182.65	144.31	163.745	171.833	198.277	160.968	197.514
YER032W	FIR1	132.299	83.3152	88.7496	90.1708	151.101	83.6935	120.337	105.091	121.326	133.908
YER033C	ZRG8	89.5677	107.873	116.338	107.973	133.124	101.162	140.461	104.833	148.393	150.012
YER034W	YER034W	122.391	136.554	205.747	207.287	423.585	123.835	120.211	120.147	133.957	136.255
YER036C	ARB1	357.126	236.7	181.218	237.775	193.264	226.422	183.812	203.696	235.527	175.852
YER039C	HVG1	154.537	197.393	186.855	220.45	166.868	225.529	129.38	239.525	132.068	113.445
YER039C-A	YER039C-A	172.967	180.078	191.21	199.749	123.908	263.178	144.392	222.53	160.336	148.405
YER041W	YEN1	88.1116	92.2576	126.331	91.805	127.461	97.5023	118.737	123.45	94.2873	97.9008
YER042W	MXR1	234.548	176.19	164.726	160.845	168.946	190.869	198.074	185.147	187.247	139.435
YER043C	SAH1	535.41	194.525	282.021	279.959	266.362	285.951	250.17	237.627	233.608	203.686
YER044C	ERG28	271.179	281.182	242.533	260.134	215.872	275.247	271.02	266.84	172.435	227.716
YER045C	ACA1	59.9829	87.9664	118.913	122.568	97.9587	97.2311	121.739	139.253	123.854	87.6712
YER046W	SPO73	159.939	155.742	183.672	218.524	185.314	208.298	161.151	221.243	195.659	257.429
YER047C	SAP1	102.12	117.498	135.235	140.17	133.722	153.415	151.225	143.415	171.586	161.991
YER048C	CAJ1	131.622	116.261	118.089	164.093	131.498	102.416	151.431	145.523	132.08	116.118
YER048W-A	ISD11	249.504	268.227	162.696	239.672	192.51	234.961	232.787	263.028	188.3	263.769
YER049W	TPA1	152.625	132.308	130.901	131.297	147.424	161.455	131.368	156.152	168.593	196.297
YER050C	RSM18	151.796	186.255	158.984	138.736	187.029	182.554	232.909	182.458	186.315	205.13
YER054C	GIP2	138.363	146.753	114.469	97.9767	139.143	69.8749	161.051	97.1131	88.6835	89.0418
YER056C	FCY2	418.282	533.844	505.785	604.609	635.713	703.612	396.605	519.22	509.767	466.096
YER056C-A	RPL34A	754.295	675.809	434.053	443.523	383.315	337.244	328.381	451.95	370.957	234.515
YER057C	HMF1	228.159	283.865	283.726	261.993	329.4	221.048	218.569	231.786	184.873	382.126
YER059W	PCL6	149.163	170.284	137.204	150.1	136.771	184.759	152.434	206.765	177.182	134.12
YER060W	FCY21	168.379	222.729	188.875	198.98	159.296	137.035	160.196	250.115	138.965	101.255
YER063W	THO1	427.813	325.589	370.386	657.168	443.008	506.242	332.109	331.649	376.123	307.795
YER065C	ICL1	286.555	244.514	241.462	569.844	205.98	451.596	223.621	316.758	215.855	276.443
YER066W	YER066W	81.3808	104.488	77.1716	103.217	109.636	119.427	98.7015	112.686	121.486	110.781
YER070W	RNR1	616.241	102.978	129.605	100.715	131.732	166.959	136.607	129.786	132.314	124.106
YER071C	YER071C	332.164	225.943	164.592	138.772	337.622	190.255	186.562	164.518	222.281	150.566
YER072W	VTC1	521.839	380.721	357.413	630.539	334.714	770.477	287.188	296.268	345.831	258.563
YER074W	RPS24A	827.976	764.608	510.719	522.598	526.64	433.716	379.736	581.427	416.633	358.588
YER074W-A	YOS1	189.625	194.035	209.463	142.713	153.647	156.018	134.37	174.638	170.739	172.299
YER075C	PTP3	138.159	89.4616	95.3734	113.383	106.085	130.95	105.851	96.6062	110.585	101.532
YER077C	YER077C	99.0991	99.202	89.8862	93.1434	129.256	93.9281	134.975	103.669	122.752	125.034
YER078C	YER078C	98.4939	141.798	141.329	137.908	154.562	156.778	164.188	152.003	129.524	111.956
YER080W	FMP29	138.228	135.802	148.776	159.76	125.201	158.84	154.883	126.294	136.518	91.8603
YER082C	UTP7	149.032	114.848	121.53	261.161	139.147	266.349	129.708	168.713	154.146	223.442
YER083C	GET2	159.287	135.556	141.73	190.016	228.46	148.103	140.541	136.552	182.677	116.383
YER087C-B	SBH1	290.22	181.836	242.718	168.66	153.484	203.314	161.701	266.102	167.218	226.279
YER087W	YER087W	104.642	126.831	118.677	119.087	117.443	102.309	118.804	110.433	120.012	93.3157
YER088C	DOT6	359.029	241.219	255.636	502.343	343.831	258.406	277.513	288.079	347.408	271.271
YER089C	PTC2	315.037	299.525	283.161	569.678	268.759	373.799	268.715	352.757	316.612	306.578
YER092W	IES5	311.889	352.243	304.218	312.217	215.639	388.899	247.898	274.442	266.249	181.757
YER093C	TSC11	113.751	110.335	93.2686	117.135	142.088	128.512	152.327	144.155	123.742	134.671
YER093C-A	YER093C-A	174.102	140.01	151.203	189.323	142.851	151.214	186.314	149.407	254.524	140.653
YER094C	PUP3	287.154	173.447	192.856	269.397	184.326	284.082	228.942	203.585	320.671	310.439
YER095W	RAD51	174.932	99.6753	123.103	155.607	119.173	89.2405	120.1	158.004	109.331	159.54
YER096W	SHC1	48.8487	56.4318	56.7543	78.408	129.606	66.0002	89.3643	90.3447	79.0803	96.4076
YER098W	UBP9	88.5989	80.6814	89.7743	100.265	109.742	93.5823	117.276	111.751	120.302	100.919
YER099C	PRS2	141.654	119.188	119.286	148.365	138.464	155.287	120.994	115.581	160.347	122.458
YER100W	UBC6	141.793	133.925	117.279	143.171	135.996	127.387	188.351	158.583	145.852	116.731
YER101C	AST2	95.6271	104.805	114.413	119.971	108.619	81.6291	93.1565	138.043	109.438	115.172
YER102W	RPS8B	791.64	660.888	548.608	539.139	559.284	500.413	375.637	660.346	517.711	363.524
YER104W	RTT105	121.78	104.933	145.938	121.883	114.611	167.615	140.008	144.716	201.473	93.159
YER105C	NUP157	154.213	128.421	122.119	138.853	153.396	157.371	151.407	141.604	190.703	161.872
YER106W	MAM1	49.5785	58.5485	43.9482	52.8832	64.6206	49.0344	75.131	65.9161	68.1098	73.8375
YER107C	GLE2	138.141	120.531	138.091	157.245	255.074	148.735	164.995	143.01	262.419	124.936
YER109C	FLO8	114.289	79.9303	82.3574	110.19	120.774	107.46	135.241	105.879	132.783	122.787
YER110C	KAP123	167.58	76.2135	78.3315	126.416	138.243	122.899	131.347	101.147	165.074	148.928
YER111C	SWI4	125.394	98.0902	105.775	88.2303	96.6078	125.471	121.638	116.466	105.468	107.224
YER112W	LSM4	198.865	179.447	154.659	139.822	135.367	184.766	152.328	164.663	178.887	259.795
YER113C	YER113C	151.46	126.775	121.086	115.567	144.704	121.865	151.565	148.348	199.545	170.804
YER114C	BOI2	113.81	80.7784	83.784	107.48	130.844	104.165	133.301	105.385	123.885	119.795
YER115C	SPR6	158.555	148.692	115.047	107.455	112.313	109.376	95.5949	125.983	113.9	143.953
YER116C	SLX8	112.013	124.29	184.323	156.509	117.921	113.315	124.785	131.021	159.629	112.541
YER117W	RPL23B	908.092	882.557	579.214	585.774	456.196	515.894	425.95	648.769	500.253	359.008
YER118C	SHO1	169.672	123.355	137.503	123.332	149.236	106.931	145.981	135.489	141.495	97.0378
YER119C	AVT6	152.078	131.892	152.13	183.546	136.834	102.378	155.626	157.919	153.013	130.176
YER120W	SCS2	253.29	210.415	230.646	261.616	204.602	208.429	262.155	190.926	189.385	197.792
YER122C	GLO3	260.015	198.66	180.511	189.353	152.521	165.011	168.158	192.705	189.197	221.203
YER123W	YCK3	155.261	199.329	154.426	204.26	195.879	198.514	185.105	227.388	204.082	181.426
YER124C	DSE1	606.344	886.913	469.427	242.032	501.106	162.638	467.026	567.384	410.375	248.066
YER125W	RSP5	213.753	212.483	218.778	248.968	182.248	191.955	204.635	210.038	198.173	206.621
YER126C	NSA2	191.334	92.2973	61.5333	105.812	115.995	150.19	113.432	104.33	110.272	132.289
YER127W	LCP5	152.015	72.4791	81.7564	99.4945	103.07	102.108	122.654	101.195	122.759	90.5469
YER128W	YER128W	142.397	171.016	146.556	132.893	151.133	231.641	184.208	227.661	144.039	165.139
YER129W	SAK1	147.438	139.373	150.98	159.105	167.832	163.448	158.39	167.413	175.131	200.865
YER130C	YER130C	222.595	250.086	262.155	218.609	196.263	205.288	170.092	210.495	253.419	150.59
YER131W	RPS26B	826.141	636.76	409.313	530.077	345.991	428.54	280.835	493.913	271.038	266.035
YER132C	PMD1	130.798	126.436	119.769	121.534	132.648	119.715	121.864	143.003	147.995	136.272
YER133W	GLC7	377.878	310.867	226.119	278.215	300.164	274.939	233.069	248.877	238.074	231.927
YER134C	YER134C	138.275	133.348	155.75	154.297	102.361	90.031	118.931	122.084	139.498	238.387
YER136W	GDI1	229.166	202.364	214.968	241.71	161.365	189.669	180.881	241.423	196.358	194.618
YER137C	YER137C	120.188	102.107	83.7057	151.391	107.238	94.0668	143.485	135.328	120.187	95.014
YER139C	YER139C	118.661	119.724	84.2936	84.3525	118.767	97.3125	121.595	116.904	93.278	121.206
YER140W	YER140W	97.4594	80.3784	101.877	89.9652	145.164	109.311	125.844	94.5544	121.177	130.174
YER141W	COX15	174.687	235.327	240.661	278.16	223.305	179.038	264.601	306.513	289.095	212.08
YER143W	DDI1	130.399	118.905	139.093	161.272	113.854	135.324	137.554	141.184	127.692	149.218
YER145C	FTR1	228.802	134.438	186.68	264.862	200.456	334.503	135.359	156.527	155.077	142.879
YER146W	LSM5	289.752	162.988	188.407	299.931	169.616	248.913	151.031	142.517	349.489	306.79
YER147C	SCC4	117.165	94.2956	109.844	137.684	106.225	105.616	110.913	115.235	128.826	154.859
YER148W	SPT15	209.13	218.329	187.084	223.527	226.08	200.624	227.896	231.588	226.264	204.43
YER149C	PEA2	124.109	102.55	95.3089	108.113	153.852	128.575	160.991	116.847	140.838	104.68
YER150W	SPI1	135.58	200.147	218.535	268.441	115.299	120.936	157.473	137.025	146.578	88.9956
YER151C	UBP3	152.574	109.602	129.85	122.005	119.934	114.022	161.459	129.683	126.708	126.767
YER152C	YER152C	110.523	87.8582	141.387	152.951	82.7447	138.459	117.196	111.493	108.412	155.003
YER153C	PET122	106.683	71.312	117.556	156.894	129.95	89.8488	93.9048	90.0437	84.7627	131.373
YER154W	OXA1	248.828	189.949	224.262	265.374	180.389	214.347	192.2	215.271	174.642	188.129
YER155C	BEM2	219.469	189.08	168.235	162.974	166.011	159.771	145.902	173.795	154.275	148.465
YER156C	YER156C	370.424	241.168	146.116	235.615	164.315	182.78	122.771	185.272	158.148	139.396
YER157W	COG3	128.059	118.893	106.268	99.0762	135.181	96.5749	117.555	116.133	128.669	157.678
YER158C	YER158C	102.478	104.36	127.254	120.723	101.446	93.1488	115.954	96.4356	129.218	158.218
YER161C	SPT2	127.604	122.512	115.057	135.375	105.366	138.007	156.105	148.461	157.403	130.396
YER162C	RAD4	91.1416	101.3	106.833	107.075	154.777	98.753	121.331	117.504	107.944	128.836
YER163C	YER163C	166.601	195.277	196.618	239.124	181.716	174.053	189.209	224.428	148.152	127.195
YER164W	CHD1	114.79	92.9946	108.616	108.098	124.846	100.833	109.061	99.9397	118.727	86.6128
YER165W	PAB1	335.529	200.524	212.108	224.814	192.697	308.312	223.27	213.127	204.977	226.635
YER166W	DNF1	145.739	115.211	111.059	127.21	135.152	116.26	140.928	131.841	153.304	141.311
YER167W	BCK2	133.638	119.773	137.033	134.362	131.157	132.572	128.57	156.024	146.665	142.182
YER168C	CCA1	134.379	110.049	111.14	108.823	118.66	131.2	125.068	119.011	122.559	110.458
YER169W	RPH1	119.422	109.788	95.0249	131.503	109.228	100.422	122.768	123.506	129.237	159.029
YER170W	ADK2	145.402	138.88	143.491	153.069	152.609	132.313	131.345	190.537	188.129	145.358
YER171W	RAD3	132.987	117.702	116.527	110.024	118.065	113.238	150.094	139.795	132.06	157.554
YER172C	BRR2	116.694	97.6676	94.7082	99.3333	115.27	97.2146	138.286	96.9541	128.35	120.904
YER173W	RAD24	108.686	131.703	115.285	109.65	186.049	119.395	150.652	128.4	162.433	225.278
YER177W	BMH1	749.221	567.667	497.355	701.975	261.27	471.251	339.847	633.783	397.583	261.77
YER179W	DMC1	72.3991	83.6163	90.6406	84.2462	88.2124	84.0121	119.554	109.199	95.495	99.8865
YER180C	ISC10	150.907	104.563	84.1012	100.386	146.269	131.144	148.345	97.3332	109.303	171.049
YER180C-A	SLO1	144.753	105.931	101.938	121.866	90.7071	85.7718	128.13	127.938	107.046	78.6102
YER182W	FMP10	115.051	132.319	129.083	154.228	105.443	147.15	145.005	162.029	108.65	112.573
YER183C	FAU1	128.248	133.235	128.489	133.348	102.339	140.974	152.147	172.027	116.35	120.572
YER185W	YER185W	60.6405	73.9428	89.0048	74.2191	100.617	112.169	116.257	109.321	135.91	132.997
YER186C	YER186C	98.1768	82.3304	116.606	77.8962	96.5448	94.7238	129.911	58.1079	94.9098	75.8503
YER187W	YER187W	47.9106	78.1543	67.7545	74.2654	60.5418	73.6801	74.7362	43.8044	56.6062	44.4689
YFL001W	DEG1	136.067	88.2643	118.282	106.568	128.819	105.61	106.229	120.054	154.12	105.075
YFL002C	SPB4	125.687	77.0842	84.855	98.2678	108.082	112.292	111.054	85.1989	105.343	128.978
YFL003C	MSH4	56.0767	60.3503	55.9908	52.0876	83.4866	62.656	86.7866	73.4646	61.6074	85.4728
YFL004W	VTC2	125.509	115.78	146.604	120.225	145.49	145.868	132.941	142.292	143.168	136.42
YFL005W	SEC4	181.734	194.879	212.508	217.619	194.488	251.048	173.104	255.454	200.983	169.082
YFL007W	BLM10	136.854	98.2425	102.656	121.796	142.009	127.804	153.76	118.973	151.956	138.867
YFL008W	SMC1	122.14	71.2694	85.7316	81.4783	96.6998	106.937	110.258	107.713	117.861	110.694
YFL009W	CDC4	121.413	121.721	138.817	131.625	122.087	137.548	119.548	135.76	160.438	125.599
YFL011W	HXT10	34.5672	30.9775	44.3273	42.5733	126.767	43.1944	66.3758	52.4786	60.304	46.914
YFL012W	YFL012W	59.9306	52.8947	41.8966	60.7862	80.8099	43.8777	109.954	66.5164	104.102	52.0185
YFL016C	MDJ1	210.023	169.841	332.466	272.322	202.265	315.89	254.851	170.52	223.349	301.801
YFL017C	GNA1	226.225	203.736	215.331	164.974	235.996	219.33	265.838	210.401	207.056	169.382
YFL017W-A	SMX2	297.903	235.863	225.699	241.728	225.207	212.38	181.218	244.273	250.067	235.734
YFL018C	LPD1	198.161	279.175	248.547	307.039	257.649	313.161	301.549	338.753	269.822	369.202
YFL021W	GAT1	184.515	270.364	247.175	266.326	191.768	303.413	213.589	214.465	234.595	214.798
YFL022C	FRS2	242.36	157.645	160.498	237.791	268.493	207.016	144.269	190.274	183.082	137.901
YFL023W	BUD27	101.331	69.487	67.6656	91.5442	96.106	79.2003	94.9271	74.8365	97.1156	91.2819
YFL024C	EPL1	249.415	217.919	183.468	234.551	206.582	223.773	247.074	215.281	203.711	232.182
YFL030W	AGX1	76.4826	141.105	167.233	184.421	139.357	137.144	131.466	181.221	177.734	110.029
YFL031W	HAC1	573.265	592.795	640.553	687.139	460.101	597.06	480	524.845	593.646	507.46
YFL033C	RIM15	96.8245	98.6179	99.6746	121.739	106.573	85.567	133.302	114.527	105.536	112.847
YFL034C-A	RPL22B	1056.18	1110.13	719.814	702.995	540.354	582.161	427.803	817.908	547.608	501.225
YFL034C-B	MOB2	194.828	200.452	177.828	187.805	167.102	136.45	134.911	205.711	160.304	215.786
YFL034W	YFL034W	85.6469	92.8216	95.8115	103.504	108.704	110.636	107.068	111.249	113.301	115.529
YFL036W	RPO41	131.564	126.643	118.416	127.519	136.482	115.882	160.692	135.406	141.836	182.832
YFL037W	TUB2	203.939	100.885	151.439	150.47	117.734	115.586	180.7	113.461	170.636	146.466
YFL038C	YPT1	352.425	289.225	336.528	460.248	403.484	289.557	313.626	341.064	261.652	259.923
YFL039C	ACT1	679.544	596.632	610.411	653.676	431.488	672.983	558.402	549.725	558.55	540.908
YFL040W	YFL040W	95.493	99.0706	115.506	90.0397	101.85	97.5226	121.004	96.1951	99.0895	95.1439
YFL041W	FET5	85.7864	91.8955	103.612	129.054	127.391	143.125	130.88	158.028	106.113	141.305
YFL041W-A	YFL041W-A	100.758	115.907	78.8372	120.118	83.3393	114.467	112.83	135.965	181.691	109.472
YFL044C	OTU1	219.393	129.748	174.064	189.686	111.281	143.965	172.31	131.468	164.069	96.0177
YFL045C	SEC53	473.884	240.011	208.867	216.602	209.69	264.3	253.132	247.37	210.302	201.222
YFL046W	FMP32	236.195	218.929	241.579	177.794	203.541	206.27	143.143	265.538	228.037	178.179
YFL047W	RGD2	135.386	163.542	115.385	136.364	146.43	119.459	147.326	138.04	144.097	127.652
YFL048C	EMP47	143.818	147.438	141.361	159.216	134.212	172.615	192.092	174.777	188.03	166.678
YFL049W	SWP82	109.962	101.595	102.382	108.174	128.203	105.02	137.503	117.889	138.203	143.905
YFL050C	ALR2	75.0459	78.783	85.5726	91.1012	97.7111	88.64	117.001	85.8186	137.795	94.0037
YFL051C	YFL051C	35.3981	39.678	69.3496	79.0396	142.691	70.7605	75.7268	66.0487	78.7417	67.0901
YFL052W	YFL052W	33.2136	36.8553	34.3654	60.1621	51.5488	55.745	82.2657	53.1048	77.0034	79.2826
YFL053W	DAK2	39.01	43.3711	59.964	62.1423	76.1401	35.669	109.472	78.417	87.7842	83.3024
YFL054C	YFL054C	60.9141	78.7394	70.2912	128.925	87.7444	80.2144	115.028	96.4407	118.896	89.6525
YFL055W	AGP3	57.4749	64.8715	105.238	99.6973	95.1146	84.6286	151.134	87.7207	94.0556	148.353
YFL056C	AAD6	123.192	92.3007	107.56	136.742	101.084	135.296	105.492	141.111	136.724	197.431
YFL058W	THI5	32.4046	29.8683	60.6802	59.9626	50.3156	46.0791	64.789	49.2559	51.2295	72.729
YFL059W	SNZ3	63.613	52.1296	73.8694	94.4421	62.6783	103.811	91.184	101.587	100.878	80.0696
YFL061W	DDI2	64.2045	57.9009	78.6599	89.9323	107.994	80.9143	104.001	94.7473	107.099	103.789
YFL062W	COS4	43.9962	48.5214	66.7377	65.6996	80.2332	73.743	84.448	75.2689	95.4904	132.997
YFL064C	YFL064C	234.81	153.973	250.969	225.511	271.553	307.997	330.247	247.185	314.418	388.127
YFL066C	YFL066C	93.586	65.8466	134.382	99.5869	104.917	109.891	121.151	96.5859	111.873	112.581
YFR001W	LOC1	176.259	100.933	104.081	95.8365	96.9131	129.724	132.781	116.739	114.546	140.034
YFR002W	NIC96	191.439	156.302	148.79	141.223	169.246	169.954	189.704	134.525	171.913	228.621
YFR003C	YPI1	217.171	227.844	242.819	260.06	168.028	193.978	246.952	173.189	195.168	296.324
YFR004W	RPN11	274.73	209.811	190.306	212.313	205.62	231.098	243.543	215.206	197.667	244.924
YFR005C	SAD1	141.056	163.111	124.157	164.913	134.161	136.887	112.969	167.547	171.201	117.975
YFR006W	YFR006W	109.763	146.412	167.61	170.429	151.044	139.832	188.145	152.531	160.949	155.572
YFR007W	YFR007W	122.659	165.552	155.098	169.945	144.459	157.097	158.031	174.572	175.923	175.209
YFR008W	FAR7	97.3127	115.865	91.4572	112.255	113.666	124.351	126.521	130.115	129.403	152.903
YFR009W	GCN20	181.458	130.816	139.736	145.474	137.659	130.375	134.871	144.643	197.626	212.739
YFR010W	UBP6	197.229	197.605	192.288	189.369	179.407	195.889	209.651	192.862	165.381	156.371
YFR011C	YFR011C	173.904	160.824	168.897	132.475	143.953	132.503	146.916	172.628	125.315	121.516
YFR012W	YFR012W	42.3044	47.4826	60.8521	47.5631	54.6444	49.7156	83.5382	52.2224	69.7486	168.571
YFR013W	IOC3	104.853	101.698	118.258	103.757	112.814	112.343	156.92	117.806	115.585	111.102
YFR014C	CMK1	125.198	132.691	164.555	142.246	124.542	180.765	170.59	143.411	120.665	123.01
YFR016C	YFR016C	91.0541	88.6287	104.19	106.573	96.9352	95.1327	128.608	107.732	126.928	120.093
YFR017C	YFR017C	88.1114	126.01	136.278	247.496	119.161	86.5654	140.443	180.784	141.703	110.608
YFR018C	YFR018C	80.0083	66.436	122.524	94.9659	84.1292	108.428	94.2796	88.2725	95.8122	105.3
YFR019W	FAB1	101.186	87.8028	103.208	103.044	136.373	96.5779	129.458	113.97	125.689	145.935
YFR021W	ATG18	144.273	172.627	255.961	180.438	130.522	173.61	147.552	164.983	173.372	123.83
YFR022W	ROG3	105	116.69	175.221	144.32	105.436	119.302	124.088	136.807	129.931	121.948
YFR023W	PES4	43.9703	45.2515	54.5788	48.7869	151.63	50.2643	77.7166	60.5598	59.4662	92.1814
YFR024C-A	LSB3	127.359	118.847	137.213	187.105	125.088	207.357	148.165	148.911	136.754	138.752
YFR026C	YFR026C	80.3731	73.5192	81.2354	72.0801	110.068	154.91	92.6348	111.453	98.9794	84.4373
YFR027W	ECO1	85.0592	66.8163	84.5925	115.429	109.657	74.7829	117.728	74.5608	81.693	97.5838
YFR028C	CDC14	168.607	122.813	137.141	139.256	141.535	157.091	146.509	128.098	155.742	140.164
YFR029W	PTR3	96.2337	97.1878	105.024	137.497	141.805	145.289	154.488	138.909	154.975	167.567
YFR031C	SMC2	112.157	98.6711	95.013	96.8877	134.487	120.034	121.566	121.245	120.644	148.833
YFR031C-A	RPL2A	715.588	621.219	502.027	603.154	436.297	400.471	384.147	539.174	451.319	348.23
YFR032C	YFR032C	103.004	99.4377	112.87	108.868	106.337	49.4708	118.906	111.212	84.2485	86.4196
YFR032C-A	RPL29	1140.17	1044.86	706.128	784.973	569.143	587.132	585.831	815.632	474.302	556.728
YFR032C-B	YFR032C-B	874.221	690.244	471.729	444.96	400.254	374.583	314.169	570.693	346.145	240.946
YFR033C	QCR6	391.491	345.942	418.984	513.559	236.29	380.887	324.962	345.844	216.426	473.072
YFR034C	PHO4	298.454	195.193	231.464	510.051	181.39	376.046	167.058	212.702	187.558	218.008
YFR035C	YFR035C	206.349	111.215	106.45	196.314	123.476	171.184	208.667	107.929	224.186	141.9
YFR036W	CDC26	167.296	179.221	210.083	276.652	120.996	151.892	126.889	131.852	174.209	130.755
YFR037C	RSC8	170.176	136.646	154.773	202.031	162.935	140.738	160.426	142.299	168.199	212.826
YFR038W	IRC5	97.0059	84.5044	89.9263	92.914	103.849	115.274	126.169	91.7662	110.329	85.604
YFR039C	YFR039C	108.982	119.47	163.002	136.564	130.762	167.376	190.807	140.132	152.018	157.26
YFR040W	SAP155	186.859	171.67	145.202	157.425	164.452	153.229	187.706	169.725	182.842	169.206
YFR041C	ERJ5	134.367	132.043	115.137	114.035	120.046	99.9822	141.038	129.641	121.497	136.578
YFR042W	YFR042W	114.497	135.352	118.061	127.362	165.191	77.041	216.258	134.737	109.464	171.94
YFR047C	BNA6	113.379	152.802	161.905	153.528	106.429	132.338	108.498	224.188	127.081	109.355
YFR048W	RMD8	110.847	131.197	138.076	124.682	177.238	129.38	152.567	134.875	117.523	128.173
YFR049W	YMR31	195.086	246.454	331.585	256.583	244.349	234.619	254.359	234.334	216.599	221.087
YFR050C	PRE4	257.074	199.019	194.063	194.508	172.951	241.018	218.918	257.997	247.156	270.524
YFR051C	RET2	201.605	240.53	233.932	298.986	180.414	211.424	234.044	236.445	211.931	236.859
YFR052W	RPN12	272.312	243.491	207.257	182.129	184.618	215.909	228.823	211.026	213.449	245.738
YFR053C	HXK1	330.478	368.974	363.312	222.911	194.637	161.19	394.905	176.532	137.824	163.924
YGL001C	ERG26	134.671	121.587	186.641	177.834	118.424	144.882	197.053	173.069	153.786	139.067
YGL002W	ERP6	151.637	137.575	136.281	144.174	97.1187	144.683	157.155	133.577	160.479	193.462
YGL003C	CDH1	141.026	107.75	149.056	153.116	115.765	141.205	164.949	143.441	157.043	217.891
YGL004C	RPN14	115.81	114.077	110.281	134.744	95.6944	141.203	144.386	125.89	130.926	141.917
YGL005C	COG7	129.212	133.368	143.629	120.463	123.11	103.968	140.977	137.476	153.463	90.5485
YGL006W	PMC1	130.916	160.025	273.265	176.366	167.607	108.826	182.019	149.97	185.148	165.157
YGL009C	LEU1	287.037	115.886	140.217	389.149	195.183	1364.31	228.869	239.719	340.67	672.89
YGL010W	YGL010W	267.738	214.532	193.746	293.216	248.792	688.999	286.77	244.125	325.252	357.729
YGL011C	SCL1	315.149	229.427	248.875	275.627	200.999	278.082	231.865	352.566	252.176	199.027
YGL012W	ERG4	263.216	221.284	212.888	275.144	279.782	260.196	195.619	306.669	235.458	179.242
YGL013C	PDR1	134.374	88.15	114.404	101.953	129.041	119.13	116.744	136.997	118.595	111.821
YGL014W	PUF4	189.004	188.005	167.392	189.719	187.28	239.139	203.659	208.712	234.828	174.305
YGL015C	YGL015C	79.3163	63.6561	51.1543	52.8083	88.3817	51.1383	131.163	68.7786	93.9131	73.5676
YGL016W	KAP122	105.913	88.1756	81.2719	81.2923	125.672	85.2378	121.279	95.3724	105.369	109.33
YGL017W	ATE1	94.8647	100.314	124.226	118.892	88.0083	94.2668	137.767	105.166	120.511	86.0749
YGL018C	JAC1	120.446	147.566	158.125	147.226	137.708	117.031	164.21	133.868	123.357	81.6742
YGL019W	CKB1	171.86	179.202	236.498	210.346	146.265	196.494	161.426	216.05	216.08	151.818
YGL020C	GET1	196.501	161.434	200.343	130.923	141.762	159.699	175.597	162.941	148.756	166.345
YGL021W	ALK1	200.551	139.801	159.305	118.149	151.935	191.293	156.968	181.776	151.027	130.367
YGL022W	STT3	204.786	160.816	224.31	238.575	181.812	230.149	190.231	189.454	182.019	232.288
YGL023C	PIB2	103.775	120.484	168.957	198.407	130.61	158.677	172.165	177.509	154.02	139.492
YGL027C	CWH41	112.986	137.414	147.388	149.772	177.823	157.958	150.978	180.569	168.295	129.077
YGL028C	SCW11	603.423	818.497	680.56	328.81	565.135	199.916	482.205	588.724	365.53	240.678
YGL029W	CGR1	213.136	172.682	144.62	156.662	108.928	142.673	211.702	184.209	159.799	118.586
YGL030W	RPL30	1292.09	1037.95	647.734	693.416	650.289	587.227	471.024	686.858	564.012	532.335
YGL035C	MIG1	179.668	141.974	151.205	138.551	119.775	114.632	112.259	128.501	115.776	144.705
YGL036W	YGL036W	133.118	175.914	127.612	172.612	137.239	126.103	155.784	174.048	172.244	217.571
YGL039W	YGL039W	154.024	152.762	161.014	156.022	142.994	115.611	151.482	172.771	193.468	142.956
YGL040C	HEM2	202.094	176.161	201.291	228.638	224.809	197.859	167.695	220.764	155.141	242.513
YGL041C-B	YGL041C-B	234.649	223.98	203.105	178.239	192.758	323.972	312.429	215.19	183.667	278.713
YGL043W	DST1	153.985	141.6	162.901	188.445	323.628	186.51	154.897	182.241	166.828	174.083
YGL044C	RNA15	121.365	138.894	165.534	160.621	119.24	173.09	135.094	171.44	135.836	136.412
YGL047W	ALG13	248.984	231.187	179.77	210.378	318.518	193.766	231.404	202.869	288.931	417.864
YGL048C	RPT6	186.223	128.837	125.305	159.065	160.704	168.659	158.055	168.158	137.113	140.056
YGL049C	TIF4632	115.388	125.81	115.18	132.568	146.374	102.827	116.479	129.971	151.693	105.658
YGL051W	MST27	130.888	130.714	139.539	173.221	100.603	143.411	165.186	132.211	136.552	137.331
YGL054C	ERV14	325.154	271.083	214.438	253.298	226.851	187.532	221.663	293.071	239.369	169.617
YGL055W	OLE1	279.255	151.014	244.202	580.995	330.736	410.043	291.146	187.327	275.694	204.917
YGL056C	SDS23	197.196	193.177	173.703	342.388	238.578	315.683	185.93	248.421	278.701	224.898
YGL057C	YGL057C	156.132	162.844	129.182	146.527	195.225	155.257	189.404	180.126	161.233	149.377
YGL061C	DUO1	100.576	120.749	198.834	126.102	134.756	124.912	141.885	107.934	176.221	105.644
YGL063W	PUS2	122.808	73.2174	102.791	167.256	156.959	155.143	96.1686	90.0121	149.127	180.332
YGL064C	MRH4	107.546	94.0406	88.367	96.3233	107.167	88.5594	130.566	131.361	150.788	86.8849
YGL065C	ALG2	141.637	163.224	151.418	126.635	221.702	192.53	185.53	197.086	184.261	139.172
YGL066W	SGF73	130.003	193.847	182.708	196.609	298.103	228.114	189.923	248.939	262.412	209.19
YGL067W	NPY1	148.18	147.155	141.614	142.253	138.521	149.178	138.902	159.705	224.546	132.955
YGL068W	MNP1	219.114	171.586	202.707	242.962	236.399	148.625	204.939	175.708	194.531	164.88
YGL070C	RPB9	224.536	178.851	178.45	227.977	183.139	192.426	168.862	154.11	159.106	186.02
YGL071W	AFT1	171.053	167.921	203.941	234.397	198.953	278.2	169.461	177.06	254.957	164.295
YGL073W	HSF1	201.873	167.84	192.041	197.218	213.331	250.851	188.304	190.124	205.754	222.19
YGL075C	MPS2	122.821	106.38	91.3346	126.77	104.023	94.3628	91.7684	114.606	86.5718	75.5045
YGL076C	RPL7A	929.91	789.855	533.402	537.016	512.979	503.478	401.014	553.444	490.815	542.35
YGL077C	HNM1	350.15	141.506	151.297	180.311	225.907	181.166	154.998	137.296	181.492	179.114
YGL078C	DBP3	213.964	117.065	101.285	121.969	160.986	128.581	109.94	108.95	110.803	130.386
YGL079W	YGL079W	159.402	110.017	113.804	112.548	137.095	94.5104	124.808	81.3792	115.945	164.685
YGL080W	FMP37	174.143	159.382	133.743	167.611	188.964	127.556	255.294	180.403	175.683	241.6
YGL081W	YGL081W	59.979	70.5167	63.452	94.9156	77.4131	59.9893	64.0532	70.8229	60.4412	52.3839
YGL082W	YGL082W	131.377	159.231	136.664	163.132	122.917	127.621	152.007	172.756	133.713	160.553
YGL083W	SCY1	193.93	179.447	167.405	150.873	147.967	135.111	173.729	196.644	175.722	143.461
YGL084C	GUP1	127.228	129.654	128.843	125.472	129.598	156.154	157.716	137.224	131.208	124.971
YGL085W	YGL085W	121.482	148.081	134.183	115.058	95.0129	119.717	147.975	137.695	108.333	114.522
YGL086W	MAD1	126.775	109.387	92.6897	99.2446	118.894	94.3054	123.781	99.6753	106.246	116.835
YGL087C	MMS2	573.515	462.857	446.735	497.055	441.042	445.749	526.634	496.772	520.382	384.616
YGL089C	MF(ALPHA)2	95.4592	76.2314	93.84	102.153	94.8196	91.607	156.421	94.9493	92.1681	97.5004
YGL090W	LIF1	88.6381	94.4486	94.6845	89.7555	96.6836	111.791	128.952	106.104	124.635	84.4786
YGL091C	NBP35	128.323	126.42	152.722	138.703	117.914	196.164	162.132	132.897	148.817	115.273
YGL092W	NUP145	167.67	119.284	122.796	119.275	131.67	131.69	135.766	142.032	146.86	131.172
YGL093W	SPC105	106.67	78.3578	90.9533	99.4472	122.131	83.9017	112.413	90.2015	94.9765	84.8919
YGL094C	PAN2	122.222	84.0836	92.467	89.1663	109.943	94.467	123.746	102.695	104.55	87.9151
YGL095C	VPS45	109.804	129.919	116.892	120.779	129.611	135.281	193.499	145.437	146.533	185.699
YGL096W	TOS8	164.347	242.664	138.252	121.832	120.877	115.048	163.619	150.054	137.155	201.551
YGL097W	SRM1	177.735	127.492	136.652	166.496	160.668	165.225	203.269	147.216	180.148	151.36
YGL098W	USE1	137.435	152.805	135.849	150.449	112.949	141.173	160.093	141.974	113.063	129.662
YGL099W	LSG1	118.413	79.5324	73.9291	81.8893	110.498	97.6071	113.058	94.9733	121.426	87.9205
YGL100W	SEH1	126.952	134.712	175.183	133.907	106.112	100.115	121.062	164.728	153.304	109.701
YGL103W	RPL28	2043.35	1846.39	1181.96	1130.99	1075.26	908.418	774.064	1252.14	1001.89	741.512
YGL105W	ARC1	277.225	255.601	220.448	251.154	216.927	241.435	218.17	234.884	197.163	223.303
YGL106W	MLC1	257.433	285.307	279.96	281.327	169.679	158.202	176.107	297.512	189.185	136.323
YGL107C	RMD9	159.188	147.751	131.296	147.137	154.451	149.687	158.805	166.22	175.213	135.779
YGL108C	YGL108C	225.23	235.309	232.675	192.207	182.008	197.67	219.867	254.564	141.463	214.919
YGL110C	CUE3	134.304	140.228	152.57	123.875	192.062	120.923	149.085	137.267	143.356	125.584
YGL111W	NSA1	122.121	69.8348	77.5219	90.1532	145.707	93.3508	116.131	99.0309	126.938	122.04
YGL112C	TAF6	126.545	101.904	104.091	105.242	130.423	136.69	133.828	114.562	159.652	174.041
YGL113W	SLD3	87.5881	76.2801	87.8185	83.8724	86.7416	105.672	98.4584	101.648	95.5626	68.0965
YGL115W	SNF4	192.143	184.893	194.357	196.264	291.698	214.687	200.356	198.538	207.268	192.615
YGL116W	CDC20	136.844	198.952	193.656	135.074	203.28	127.308	152.008	239.773	135.357	151.274
YGL119W	ABC1	88.2811	93.5735	85.3357	81.3875	96.5711	70.3585	109.095	82.5074	103.734	112.338
YGL120C	PRP43	141.676	68.035	60.5395	79.3291	112.858	73.7875	106.014	67.1304	91.4785	104.519
YGL121C	GPG1	278.905	284.51	206.885	249.321	200.797	215.346	289.918	217.385	220.605	243.783
YGL122C	NAB2	318.425	231.879	217.638	303.628	178.764	264.99	233.229	243.044	305.811	283.373
YGL123W	RPS2	1105.03	916.804	713.136	871.742	591.089	618.885	493.487	773.673	660.726	572.39
YGL126W	SCS3	138.975	149.486	233.534	260.996	139.898	135.945	135.953	174.864	213.161	150.139
YGL127C	SOH1	175.838	162.75	215.612	219.8	195.033	143.824	195.79	186.539	190.953	143.791
YGL128C	CWC23	133.625	130.518	136.171	134.974	152.287	122.614	172.166	134.428	125.618	100.848
YGL129C	RSM23	135.467	149.893	119.926	119.536	193.439	129.992	128.457	152.455	118.3	160.781
YGL130W	CEG1	109.369	126.732	134.433	118.278	125.575	114.689	162.599	131.925	142.976	93.8706
YGL131C	SNT2	100.069	114.825	109.333	98.9709	137.878	116.873	135.832	122.147	129.027	123.519
YGL133W	ITC1	169.313	203.637	168.377	161.033	176.412	150.456	159.362	167.04	167.62	200.612
YGL134W	PCL10	201.464	197.263	149.037	166.76	177.95	184.365	153.475	206.108	218.603	218.76
YGL135W	RPL1B	1056.46	1018.81	751.773	745.726	726.266	520.101	502.984	896.75	611.433	445.051
YGL136C	MRM2	215.569	215.145	187.416	207.114	166.725	178.061	200.778	201.62	147.826	205.006
YGL137W	SEC27	211.831	199.341	187.562	228.075	199.452	202.139	184.347	224.116	255.815	216.842
YGL138C	YGL138C	42.9313	53.6209	43.2182	42.2799	60.9574	38.5508	56.4874	58.1503	66.199	159.019
YGL139W	FLC3	98.843	82.2147	98.0214	102.656	130.564	96.3853	153.532	98.5256	115.226	103.524
YGL140C	YGL140C	112.724	122.695	128.296	137.337	154.048	122.827	166.014	134.533	154.408	149.769
YGL141W	HUL5	104.756	148.617	132.861	122.399	157.737	143.176	152.886	147.856	143.919	138.841
YGL142C	GPI10	93.2957	122.977	102.235	100.573	126.84	98.3869	136.9	117.133	115.402	124.718
YGL143C	MRF1	96.8229	114.797	131.327	120.211	111.107	99.3234	110.789	141.309	138.062	122.598
YGL144C	ROG1	96.2053	126.113	124.157	109.597	154.713	139.142	130.408	137.869	145.154	91.1454
YGL145W	TIP20	113.638	109.25	119.535	90.62	111.323	113.988	149.643	129.603	117.884	145.709
YGL146C	YGL146C	186.18	161.104	131.763	173.826	132.106	140.558	126.933	171.291	127.508	130.177
YGL147C	RPL9A	847.529	568.973	372.51	527.494	536.492	390.892	294.354	471.661	373.471	305.393
YGL150C	INO80	124.589	132.591	135.039	153.604	144.185	164.47	149.861	151.82	147.467	123.574
YGL151W	NUT1	131.62	145.912	124.551	115.209	165.48	129.345	136.514	140.186	130.374	152.599
YGL155W	CDC43	118.372	131.891	132.473	127.753	158.028	130.997	142.454	164.856	160.153	224.202
YGL156W	AMS1	135.208	167.11	174.249	179.268	160.197	135.427	164.255	179.548	145.467	153.056
YGL157W	YGL157W	158.604	165.143	136.419	135.127	141.753	86.6258	122.681	176.23	140.437	121.242
YGL158W	RCK1	37.0367	40.9583	40.369	54.3394	63.2393	39.1216	78.3833	55.5028	73.2843	74.5539
YGL159W	YGL159W	109.93	100.38	82.602	92.9195	121.472	108.888	126.08	105.174	107.549	110.176
YGL160W	YGL160W	90.763	108.916	89.3662	110.86	109.903	100.491	115.446	115.24	150.96	108.575
YGL161C	YIP5	158.783	207.908	190.839	218.674	137.765	190.772	183.452	202.707	199.656	165.039
YGL163C	RAD54	101.558	81.7373	83.135	101.785	108.288	151.041	120.162	127.468	118.021	109.264
YGL164C	YRB30	107.94	123.963	163.657	146.735	94.003	110.641	154.117	95.3711	162.776	124.696
YGL166W	CUP2	111.336	137.104	183.663	270.306	147.145	180.99	143.72	119.493	132.373	147.256
YGL167C	PMR1	212.85	216.868	228.592	261.486	254.581	233.878	236.814	213.732	273.698	273.824
YGL168W	HUR1	317.246	267.42	306.562	265.378	317.915	315.748	267.816	226.628	295.302	399.772
YGL169W	SUA5	98.5943	87.8498	115.836	108.694	120.877	91.2592	126.573	90.0436	115.823	129.692
YGL170C	SPO74	54.0803	49.0025	40.206	43.3635	109.855	39.6731	56.1596	61.5003	67.1953	77.1694
YGL171W	ROK1	101.598	52.0063	51.0106	67.6121	98.9344	90.6195	79.6169	72.5565	84.7056	76.3832
YGL172W	NUP49	154.621	120.182	159.432	164.388	132.855	149.501	148.858	139.826	129.951	141.837
YGL173C	KEM1	221.163	160.622	164.515	166.102	169.922	194.541	201.725	176.265	179.187	218.232
YGL174W	BUD13	174.195	137.317	134.133	152.243	133.703	139.629	192.754	161.416	196.233	117.76
YGL175C	SAE2	125.896	104.989	146.204	88.5267	103.218	100.609	98.5467	105.439	69.4048	78.869
YGL176C	YGL176C	124.347	97.7459	105.766	85.68	117.351	99.1768	125.483	92.3689	94.1859	84.6424
YGL178W	MPT5	191.59	223.88	197.883	163.329	173.661	201.926	174.844	185.921	182.41	181.464
YGL179C	TOS3	123.098	142.594	138.171	156.301	126.896	111.647	155.784	149.84	136.69	133.045
YGL187C	COX4	207.913	216.688	188.288	177.63	153.885	188.188	202.884	183.862	174.84	181.913
YGL189C	RPS26A	1202.6	1178.45	754.282	837.933	642.523	666.463	517.778	857.503	541.503	478.118
YGL190C	CDC55	257.936	261.075	200.49	224.72	264.626	159.804	197.361	235.883	210.909	236.029
YGL191W	COX13	217.842	225.087	179.371	216.726	160.109	171.923	173.758	150.306	300.191	200.82
YGL192W	IME4	199.678	175.789	163.09	192.875	157.404	195.25	185.923	203.774	183.788	199.469
YGL194C	HOS2	199.335	220.298	177.912	165.813	153.575	204.376	167.524	186.143	200.454	170.153
YGL194C-A	YGL194C-A	234.486	253.918	172.706	151.79	194.378	210.401	187.881	209.063	164.518	140.761
YGL195W	GCN1	175.943	150.566	131.476	152.453	165.811	137.676	151.379	157.005	171.373	180.479
YGL196W	YGL196W	225.974	228.682	216.637	194.94	236.08	142.497	229.545	238.207	204.848	178.454
YGL197W	MDS3	144.944	167.536	159.584	187.249	164.23	120.248	168.374	185.151	179.006	142.342
YGL198W	YIP4	291.488	303.449	350.038	369.688	138.71	237.901	164.983	237.299	257.838	151.852
YGL200C	EMP24	234.187	188.083	185.319	253.926	149.1	220.456	184.765	176.349	168.397	160.571
YGL201C	MCM6	118.65	107.385	119.291	115.035	118.955	147.344	143.869	125.262	133.879	162.057
YGL203C	KEX1	113.396	108.237	109.333	121.679	123.941	95.259	131.791	122.124	128.393	148.955
YGL205W	POX1	71.6768	85.6891	92.7556	76.4729	111.18	92.6792	125.8	102.521	119.212	105.853
YGL206C	CHC1	220.012	236.526	196.891	232.581	173.606	185.515	193.95	233.117	194.305	185.342
YGL207W	SPT16	210.545	142.359	127.845	141.597	163.27	162.562	173.067	176.205	174.23	202.694
YGL209W	MIG2	405.654	347.93	384.729	459.529	340.827	247.416	491.337	331.825	333.541	307.918
YGL210W	YPT32	328.168	213.319	211.04	245.801	164.387	180.032	230.018	206.797	221.021	162.753
YGL211W	NCS6	171.852	115.701	142.637	142.414	146.864	183.824	139.813	125.937	167.691	120.469
YGL212W	VAM7	106.882	95.5574	101.325	124.673	86.4595	115.67	120.016	101.732	105.516	123.754
YGL213C	SKI8	124.033	140.324	143.481	123.306	134.38	125.993	140.386	146.977	149.725	100.37
YGL215W	CLG1	247.449	304.734	257.536	266.077	193.43	310.199	259.771	342.506	282.223	234.518
YGL216W	KIP3	131.631	86.2528	109.963	110.878	96.9524	110.375	133.876	86.6029	117.819	129.603
YGL220W	YGL220W	156.283	194.654	209.062	220.771	235.988	215.563	170.279	224.542	174.602	128.083
YGL221C	NIF3	168.252	198.268	195.734	227.135	179.671	202.135	147.153	228.278	136.599	145.074
YGL222C	EDC1	276.122	357.677	235.831	301.227	214.424	265.225	313.036	303.289	186.713	195.773
YGL225W	VRG4	374.993	314.033	272.995	327.108	254.035	310.435	356.66	317.183	219.598	256.954
YGL226C-A	OST5	216.003	174.037	187.692	145.72	120.619	179.225	243.374	187.132	159.354	166.41
YGL226W	YGL226W	194.339	137.77	159.48	161.517	130.227	112.054	147.889	120.702	142.5	81.3714
YGL227W	VID30	111.826	128.333	133.379	153.228	121.72	107.306	141.432	137.02	127.975	104.077
YGL228W	SHE10	137.458	152.248	194.216	182.353	243.775	207.432	155.627	188.884	177.556	129.404
YGL230C	YGL230C	128.334	122.192	94.2634	112.997	98.0515	116.458	117.185	100.149	137.981	118.973
YGL231C	YGL231C	156.377	163.143	168.593	138.22	121.497	145.653	135.48	228.222	130.467	119.544
YGL232W	TAN1	163.546	163.101	141.587	140.06	130.239	116.842	133.387	183.134	116.942	112.133
YGL233W	SEC15	118.687	112.011	97.2713	96.7293	115.427	106.925	129.311	114.011	130.941	108.489
YGL234W	ADE5,7	158.579	132.806	143.44	196.805	158.051	234.911	161.289	184.726	191.945	170.178
YGL236C	MTO1	92.8291	114.188	111.282	175.245	120.536	159.311	129.22	129.632	153.898	129.328
YGL237C	HAP2	127.578	125.16	158.285	157.643	128.251	134.992	123.979	143.577	146.313	91.1377
YGL238W	CSE1	220.533	154.015	122.086	155.993	171.854	179.778	166.474	167.348	167.877	209.738
YGL240W	DOC1	124.318	104.665	121.148	108.593	78.6977	88.4128	156.811	108.918	138.558	90.1812
YGL241W	KAP114	93.5323	74.1055	106.398	69.8885	111.532	76.4647	93.7042	79.5202	109.115	77.8682
YGL242C	YGL242C	120.725	119.358	134.074	117.82	125.307	73.005	143.825	107.895	179.933	86.6988
YGL243W	TAD1	100.226	105.466	108.325	82.761	119.779	95.7894	138.829	98.6212	110.822	114.729
YGL244W	RTF1	116.549	127.298	141.321	130.737	139.355	135.673	165.758	163.327	164.164	174.084
YGL245W	GUS1	196.443	148.235	146.547	179.672	147.996	184.989	186.092	173.004	192.129	174.638
YGL246C	RAI1	138.002	108.634	130.639	103.866	128.914	125.253	108.026	144.741	112.559	97.9196
YGL247W	BRR6	239.267	267.583	217.746	246.048	268.779	217.321	330.66	262.672	272.234	358.522
YGL249W	ZIP2	100.51	125.351	111.058	77.9037	139.129	111.398	112.1	124.154	127.387	82.6617
YGL250W	YGL250W	117.405	142.144	104.999	135.312	88.2688	99.708	114.745	156.964	101.115	98.0852
YGL251C	HFM1	89.8728	113.857	79.4931	107.463	125.77	104.449	124.446	126.175	137.73	140.974
YGL252C	RTG2	156.297	148.888	177.312	174.389	185.93	182.061	227.492	186.312	205.296	198.213
YGL253W	HXK2	526.498	194.814	300.533	235.36	228.095	257.686	240.517	224.234	259.06	257.809
YGL254W	FZF1	182.78	129.904	115.885	174.582	150.511	154.087	189.08	163.874	120.544	111.792
YGL255W	ZRT1	598.779	368.66	120.919	145.998	403.676	166.966	373.96	145.077	130.569	200.382
YGL256W	ADH4	153.679	105.342	124.98	112.967	144.504	124.174	150.332	126.273	112.875	111.599
YGL257C	MNT2	124.445	105.008	154.314	105.831	108.408	126.202	169.275	133.334	111.764	109.398
YGL258W	VEL1	55.3968	52.2232	70.9084	69.3252	121.093	65.1604	96.4385	102.995	95.5368	71.2231
YGL259W	YPS5	37.7251	57.7726	71.436	62.4367	61.9022	85.6674	82.9487	144.238	86.793	84.5357
YGL260W	YGL260W	23.9663	23.5957	22.6018	37.2608	29.9229	17.1879	38.3047	34.9018	56.6001	29.5276
YGL261C	PAU11	22.7105	30.031	86.7804	37.1531	101.453	25.11	81.0591	52.0208	80.8019	41.9149
YGR001C	YGR001C	182.745	193.848	175.023	161.03	169.508	249.063	176.885	214.914	176.215	138.351
YGR002C	SWC4	130.965	136.738	135.199	136.353	134.935	174.18	172.949	141.691	168.663	130.275
YGR003W	CUL3	93.5445	92.9669	92.1239	86.217	112.682	112.346	139.911	118.417	156.469	156.069
YGR004W	PEX31	97.6146	69.5879	63.4103	89.9646	96.0693	86.6099	109.841	72.891	67.6167	75.0691
YGR005C	TFG2	119.162	104.991	115.996	121.668	136.947	121.981	140.129	89.4752	132.818	106.239
YGR006W	PRP18	208.693	196.02	181.136	204.603	156.82	159.969	172.342	205.21	217.588	222.669
YGR007W	MUQ1	279.262	325.835	273.132	285.101	323.562	212.667	248.862	251.539	204.424	186.044
YGR009C	SEC9	133.612	129.019	144.518	171.407	138.485	125.072	143.281	176.386	158.118	124.078
YGR010W	NMA2	140.268	113.661	129.416	165.903	108.794	191.91	132.452	184.167	178.262	131.579
YGR012W	YGR012W	130.473	106.925	168.702	157.269	166.904	172.269	134.8	147.61	157.038	156.601
YGR013W	SNU71	174.755	157.473	147.851	182.456	122.351	133.146	136.203	133.554	132.011	115.214
YGR014W	MSB2	375.913	260.788	259.478	213.656	169.635	156.133	147.211	209.526	148.254	146.64
YGR015C	YGR015C	162.423	156.663	130.864	115.545	134.022	116.511	158.432	166.664	148.214	231.701
YGR016W	YGR016W	125.186	136.436	127.726	105.548	83.4469	111.284	140.689	147.724	122.474	94.8227
YGR017W	YGR017W	214.652	262.123	215.871	261.312	219.714	263.733	183.342	297.711	187.472	174.128
YGR020C	VMA7	264.603	327.234	254.293	329.622	179.118	294.948	273.104	291.888	382.296	234.28
YGR021W	YGR021W	134.804	135.937	160.316	169.653	121.701	121.682	133.488	101.111	206.449	176.868
YGR024C	THG1	166.611	135.023	106.553	125.35	183.792	104.723	135.063	147.561	183.188	104.726
YGR026W	YGR026W	218.76	236.441	210.975	163.939	165.961	117.895	180.509	230.673	187.099	173.757
YGR027C	RPS25A	973.014	944.509	805.887	764.514	737.697	591.331	596.492	933.874	688.837	465.76
YGR030C	POP6	396.667	249.998	208.04	274.033	279.461	300.618	304.712	290.671	262.537	237.478
YGR031W	YGR031W	148.964	113.094	143.634	216.393	132.228	152.081	174.416	108.687	179.313	111.71
YGR033C	TIM21	211.496	195.757	177.67	170.072	169.347	164.934	158.919	175.341	170.531	154.726
YGR034W	RPL26B	796.726	653.464	426.701	472.394	388.484	365.812	347.629	488.299	399.574	341.227
YGR035C	YGR035C	191.691	180.604	326.004	166.601	237.568	166.56	175.049	171.177	155.096	95.8416
YGR036C	CAX4	134.989	103.189	89.9746	108.166	124.657	90.2476	116.58	94.4894	137.783	134.539
YGR037C	ACB1	421.365	323.233	336.975	281.83	235.839	233.111	227.599	379.627	276.71	277.192
YGR038W	ORM1	222.338	193.894	168.39	229.297	135.188	209.288	205.546	217.269	219.229	162.365
YGR040W	KSS1	285.74	174.012	210.592	237.962	122.747	233.679	178.087	204.79	179.766	171.049
YGR041W	BUD9	209.58	176.178	192.156	154.65	154.149	125.261	188.943	188.445	143.39	116.914
YGR042W	YGR042W	127.852	156.7	181.653	170.913	103.301	123.616	131.862	136.457	150.648	161.514
YGR044C	RME1	125.197	188.545	167.973	137.714	155.979	129.975	154.156	163.857	121.501	71.3219
YGR046W	TAM41	130.324	134.96	131.787	145.4	147.548	154.213	185.654	147.507	166.989	148.832
YGR047C	TFC4	99.3599	78.5397	96.6348	84.3321	119.608	103.671	113.046	98.4962	103.941	134.882
YGR048W	UFD1	155.268	114.436	116.19	120.074	95.6809	151.668	131.33	146.273	119.822	116.088
YGR049W	SCM4	276.659	255.688	235.847	322.421	273.938	185.747	163.504	210.143	179.068	124.536
YGR053C	YGR053C	82.32	106.097	93.0791	107.136	144.514	84.4808	144.317	112.402	81.3761	76.7225
YGR054W	YGR054W	252.727	180.802	162.256	198.747	187.532	203.759	223.715	171.91	201.61	216.904
YGR056W	RSC1	161.486	134.063	143.859	141.006	159.83	158.206	174.966	165.816	179.239	196.155
YGR057C	LST7	107.526	90.3877	83.742	86.3759	100.139	136.977	115.025	75.6354	112.904	100.857
YGR058W	YGR058W	107.497	80.3548	84.8908	107.679	95.5833	97.732	135.223	101.887	106.049	170.376
YGR059W	SPR3	83.084	70.8012	81.0895	95.7774	95.3021	80.8847	87.8161	87.0203	83.2961	92.6702
YGR060W	ERG25	356.259	240.352	432.494	539.605	565.025	468.888	549.986	399.974	625.315	443.615
YGR061C	ADE6	177.766	196.864	168.532	189.863	224.425	239.997	179.086	240.983	234.374	178.333
YGR062C	COX18	387.939	415.345	318.925	366.675	261.29	395.768	245.484	454.752	330.802	285.926
YGR063C	SPT4	306.878	399.288	335.123	322.697	287.169	353.339	223.356	359.628	320.302	394.46
YGR067C	YGR067C	48.9632	64.4878	71.5612	93.8127	94.437	69.444	67.7295	83.8453	95.6984	78.9602
YGR068C	YGR068C	114.698	103.329	107.956	146.785	127.525	120.631	130.93	102.095	120.852	113.186
YGR070W	ROM1	128.134	167.154	130.739	118.591	136.497	110.005	125.451	135.81	120.617	120.851
YGR071C	YGR071C	114.353	113.002	99.6822	94.8446	97.0995	91.271	104.485	112.046	108.346	150.46
YGR072W	UPF3	118.214	106.294	77.2356	86.334	100.03	121.585	130.912	100.891	96.6586	100.34
YGR074W	SMD1	281.775	246.544	304.124	234.189	176.851	313.014	189.572	270.788	194.408	188.87
YGR075C	PRP38	217.808	218.947	189.516	158.549	220.805	195.371	179.805	191.638	216.295	216.592
YGR076C	MRPL25	187.412	181.168	172.229	149.897	187.568	152.862	194.626	151.791	162.259	166.2
YGR077C	PEX8	178.801	152.652	164.477	146.898	141.787	134.235	165.328	175.166	144.711	148.009
YGR078C	PAC10	223.554	160.529	165.803	153.212	129.248	130.646	177.533	129.562	145.809	126.221
YGR079W	YGR079W	217.847	76.736	93.4416	107.615	83.9449	119.895	86.9652	103.235	92.1412	97.8586
YGR080W	TWF1	182.735	201.966	194.603	244.514	184.447	237.39	215.805	198.209	295.976	175.582
YGR081C	SLX9	213.086	178.538	176.901	180.671	197.924	167.452	221.725	168.134	239.6	134.439
YGR082W	TOM20	179.864	156.636	137.817	185.911	124.328	197.198	298.694	179.628	126.792	161.119
YGR083C	GCD2	158.383	122.252	114.764	124.86	132.944	147.664	134.798	135.179	147.127	139.379
YGR084C	MRP13	252.215	225.27	208.37	198.41	212.929	159.828	193.505	191.039	199.037	210.921
YGR085C	RPL11B	1001.52	801.376	638.153	658.542	513.02	585.588	478.643	572.622	546.192	431.744
YGR086C	PIL1	712.173	699.238	630.964	1357.25	578.675	674.737	675.947	552.601	509.367	337.247
YGR087C	PDC6	66.4106	75.8779	71.7279	159.633	89.198	105.173	95.4616	107.387	63.8837	62.3201
YGR089W	NNF2	147.043	125.201	113.946	112.992	139.394	126.426	138.563	141.1	166.735	169.256
YGR090W	UTP22	205.364	137.69	104.757	120.389	151.928	122.773	145.157	139.172	146.026	151.063
YGR091W	PRP31	192.492	144.758	112.627	134.719	187.169	159.882	140.908	159.767	119.685	105.651
YGR092W	DBF2	179.365	172.009	167.807	133.191	184.982	219.552	196.108	214.799	170.213	195.04
YGR094W	VAS1	240.957	258.69	238.737	308.365	291.057	368.784	219.572	300.558	290.857	276.114
YGR095C	RRP46	133.517	110.617	123.411	153.15	156.096	187.98	116.581	115.59	190.927	152.903
YGR098C	ESP1	99.4389	65.6239	72.3205	57.7541	114.05	69.4768	105.993	80.5257	93.705	102.459
YGR099W	TEL2	120.44	89.5048	81.8821	83.3371	147.565	92.6571	124.265	108.89	105.962	129.907
YGR100W	MDR1	100.053	118.863	119.679	123.832	118.079	134.906	157.648	141.357	143.793	127.343
YGR101W	PCP1	153.725	145.897	137.942	145.39	175.908	138.808	132.274	150.835	178.473	146.76
YGR102C	YGR102C	153.917	168.115	125.732	185.226	140.559	196.99	164.725	178.911	167.509	140.12
YGR103W	NOP7	162.581	64.3675	72.1192	84.5679	166.252	117.578	120.944	62.3658	126.391	121.849
YGR104C	SRB5	126.262	116.372	108.076	113.317	191.579	124.895	131.378	108.809	119.538	116.343
YGR105W	VMA21	263.286	234.065	243.813	204.938	188.859	192.332	330.198	198.889	170.068	178.925
YGR106C	YGR106C	265.509	221.467	189.767	183.053	215.671	161.694	168.138	178.344	183.353	168.4
YGR108W	CLB1	381.486	208.491	315.631	123.533	414.15	110.017	441.434	184.612	159.866	119.077
YGR109C	CLB6	199.817	61.4684	79.7104	46.3138	126.181	53.1316	105.378	72.7181	72.6434	91.6321
YGR111W	YGR111W	111.077	140.959	98.3552	123.44	124.178	99.9409	144.806	136.103	125.37	96.7
YGR112W	SHY1	88.5155	123.949	115.497	174.85	154.396	106.958	116.316	163.273	104.318	59.8343
YGR113W	DAM1	174.613	145.286	161.366	146.929	155.414	178.941	165.484	164.852	159.256	188.406
YGR116W	SPT6	164.586	153.359	132.284	148.676	174.911	158.303	161.862	164.66	170.402	160.844
YGR117C	YGR117C	148.801	167.065	121.29	135.487	122.209	116.936	134.095	171.564	132.703	181.415
YGR118W	RPS23A	931.144	951.272	697.437	705.695	617.321	608.315	466.891	758.41	571.353	558.868
YGR119C	NUP57	254.829	264.757	274.487	234.226	279.73	249.554	262.467	262.726	241.703	282.356
YGR120C	COG2	237.861	234.509	195.901	182.901	147.081	163.021	197.958	229.68	169.231	135.139
YGR121C	MEP1	151.545	147.234	244.327	172.239	197.942	184.783	172.461	152.045	168.586	205.488
YGR121W-A	YGR121W-A	230.948	165.561	210.338	218.115	170.177	169.56	184.362	191.704	228.282	311.083
YGR122W	YGR122W	112.352	155.242	146.429	122.534	206.67	122.072	170.68	143.509	155.41	119.304
YGR123C	PPT1	121.834	86.9053	74.517	71.3292	108.18	90.8897	88.186	87.4073	92.2543	67.3221
YGR125W	YGR125W	124.542	149.981	129.074	128.226	147.69	122.922	157.278	146.073	163	134.352
YGR126W	YGR126W	183.772	195.641	148.776	155.89	158.914	128.972	141.117	158.132	166.91	106.926
YGR127W	YGR127W	202.394	246.725	219.759	221.126	178.014	133.884	199.919	222.43	213.091	192.168
YGR128C	UTP8	157.002	93.468	71.2356	103.596	144.785	133.068	125.038	92.6853	132.026	123.205
YGR129W	SYF2	132.573	139.157	132.425	148.48	158.82	94.0909	166.929	102.373	143.961	84.9627
YGR130C	YGR130C	263.972	349.953	270.368	382.275	218.113	228.791	232.657	305.734	266.342	208.454
YGR132C	PHB1	197.072	210.165	238.444	234.393	169.033	200.975	230.874	227.157	230.438	208.338
YGR133W	PEX4	119.75	121.76	115.845	120.722	130.435	101.948	120.606	150.632	163.849	121.154
YGR134W	CAF130	106.953	106.774	126.108	116.12	145.917	117.097	157.046	128.009	122.467	143.151
YGR135W	PRE9	292.105	246.334	268.561	247.088	151.567	217.835	223.534	278.456	222.947	218.479
YGR136W	LSB1	191.765	180.963	226.207	196.428	161.033	192.304	213.883	194.461	174.729	178.391
YGR140W	CBF2	108.744	54.9851	60.3805	65.5955	93.4014	86.2093	104.224	88.043	87.2471	138.29
YGR141W	VPS62	118.438	102.944	168.849	133.892	132.397	178.334	173.77	126.54	140.876	127.65
YGR142W	BTN2	173.562	80.1604	266.248	108.939	85.5656	179.103	153.241	92.1478	98.6985	166.523
YGR143W	SKN1	182.927	216.695	177.899	219.444	185.758	156.202	202.771	214.053	170.558	146.964
YGR144W	THI4	57.7375	73.03	93.5766	133.065	103.16	91.7423	105.671	76.7031	97.625	77.4735
YGR145W	ENP2	102.882	57.229	80.0693	88.8293	139.475	117.062	123.506	78.2504	121.779	118.168
YGR147C	NAT2	180.095	156.197	192.477	275.874	182.088	211.446	175.4	208.276	255.34	221.795
YGR148C	RPL24B	688.552	594.307	430.451	479.098	358.723	456.342	328.605	456.062	393.923	324.091
YGR149W	YGR149W	147.301	189.069	140.869	144.526	114.044	134.603	126.5	148.003	136.78	197.065
YGR150C	YGR150C	125.612	127.719	112.815	108.487	102.642	109.37	135.185	124.186	104.62	99.0293
YGR152C	RSR1	150.454	102.923	93.7949	99.9228	143.53	114.062	111.649	147.14	126.368	144.435
YGR153W	YGR153W	143.187	125.994	180.167	132.939	142.297	128.072	133.422	130.133	111.091	79.1326
YGR154C	GTO1	130.827	132.151	106.902	106.947	116.441	159.415	114.659	153.612	107.084	135.194
YGR155W	CYS4	504.679	216.391	164.767	156.006	186.606	290.807	165.949	179.073	191.979	182.538
YGR156W	PTI1	466.023	206.215	178.602	177.594	204.736	209.543	205.088	223.755	178.659	266.416
YGR158C	MTR3	208.182	131.629	106.833	121.488	133.858	116.628	157.802	162.389	150.008	206.314
YGR159C	NSR1	383.299	104.864	91.9785	127.476	135.745	117.53	134.686	107.281	145.797	131.742
YGR162W	TIF4631	268.732	131.574	112.89	156.496	170.483	155.624	143.2	138.602	160.747	123.351
YGR163W	GTR2	151.452	123.883	110.808	114.864	117.608	129.93	119.882	138.187	142.376	130.221
YGR165W	MRPS35	141.112	127.742	96.1199	124.472	148.814	140.731	175.849	144.575	117.744	145.212
YGR166W	KRE11	123.135	117.647	95.8068	107.739	108.995	111.138	123.918	132.138	140.636	161.537
YGR167W	CLC1	243.154	244.629	238.441	276.519	185.085	205.032	262.093	290.497	287.686	180.417
YGR168C	YGR168C	139.939	132.519	110.115	108.634	128.298	108.489	136.912	156.825	122.51	159.557
YGR169C	PUS6	117.967	104.449	108.28	101.72	163.281	95.647	97.9322	105.854	71.9222	109.762
YGR169C-A	YGR169C-A	319.581	218.68	167.822	232.909	144.15	101.815	147.977	194.782	164.021	217.975
YGR170W	PSD2	125.108	113.275	112.302	108.849	162.23	100.803	168.599	132.632	157.832	173.43
YGR171C	MSM1	115.68	108.637	103.436	99.012	114.358	109.885	127.71	116.427	112.624	101.175
YGR172C	YIP1	176.131	148.616	117.483	124.798	167.963	147.343	131.288	134.582	150.942	121.586
YGR173W	RBG2	147.016	100.62	80.8975	115.516	89.2117	92.4031	107.214	114.241	171.613	130.426
YGR174C	CBP4	129.685	138.327	149.582	171.388	118.711	139.185	170.233	177.53	143.44	127.547
YGR175C	ERG1	290.275	310.86	354.997	421.1	226.278	345.662	243.839	464.338	291.272	224.673
YGR177C	ATF2	188.475	119.057	140.402	160.876	148.872	196.326	172.543	162.673	179.129	196.922
YGR178C	PBP1	206.762	160.688	172.37	177.387	143.077	151.899	161.746	163.914	183.961	141.393
YGR179C	OKP1	124.301	100.004	98.5312	105.615	129.764	100.703	135.907	95.3619	106.892	103.681
YGR180C	RNR4	134.462	152.576	195.931	135.139	156.552	145.144	134.584	171.515	117.316	143.679
YGR181W	TIM13	276.108	278.897	282.375	275.904	182.804	251.924	256.1	217.316	197.702	321.761
YGR183C	QCR9	361.48	316.755	323.379	280.538	264.516	288.093	391.91	314.261	284.523	328.609
YGR184C	UBR1	127.155	123.452	142.412	120.964	143.101	126.928	161.983	138.778	142.52	164.27
YGR185C	TYS1	307.664	417.959	312.341	345.9	291.37	445.391	316.597	408.151	351.264	270.658
YGR186W	TFG1	140	151.026	151.237	175.517	197.08	177.687	150.355	146.091	188.979	165.336
YGR187C	HGH1	161.902	147.106	115.709	132.057	256.711	178.751	192.268	179.98	192.498	178.682
YGR188C	BUB1	73.2697	47.693	66.9215	59.1411	73.0708	63.7625	91.4247	73.3019	86.5118	81.0246
YGR189C	CRH1	377.928	482.642	609.833	785.772	443.144	572.226	405.616	379.974	359.814	437.756
YGR191W	HIP1	179.98	202.705	152.291	240.706	207.737	322.242	221.695	231.492	207.993	198.754
YGR192C	TDH3	3361.31	2947.09	3529.47	2220.46	3136.2	1925.76	3374.5	2347.42	2360.32	2981.22
YGR193C	PDX1	218.639	209.158	221.545	225.554	231.767	270.053	168.533	261.287	186.226	132.995
YGR194C	XKS1	122.816	161.201	148.278	199.21	134.781	163.187	163.709	211.181	173.104	166.747
YGR195W	SKI6	217.009	161.234	165.249	192.771	189.531	169.205	183.074	197.133	162.426	184.366
YGR196C	FYV8	127.616	118.499	126.533	130.428	150.87	129.884	161.863	127.551	173.467	136.75
YGR197C	SNG1	111.628	112.57	127.285	143.294	243.566	199.893	134.961	207.97	162.187	104.579
YGR198W	YPP1	170.022	149.751	145.164	138.388	149.742	173.255	157.202	177.44	152.45	168.779
YGR199W	PMT6	160.787	183.884	139.964	130.651	149.817	140.445	153.125	162.048	175.292	109.416
YGR200C	ELP2	163.753	103.382	90.8149	113.726	127.213	105.362	133.783	118.315	144.37	126.488
YGR202C	PCT1	157.04	191.412	177.112	244.619	254.414	249.203	218.359	221.628	233.617	153.197
YGR203W	YGR203W	156.38	130.653	179.253	277.989	227.547	165.66	195.444	187.718	222.8	273.77
YGR205W	YGR205W	167.475	180.083	160.863	162.995	183.69	129.285	144.77	177.7	186.487	136.126
YGR206W	YGR206W	239.638	261.501	217.305	209.753	208.341	226.853	187.248	236.105	255.233	158.823
YGR207C	YGR207C	143.533	188.842	148.324	175.114	193.192	183.744	153.653	239.652	167.481	189.958
YGR208W	SER2	210.801	218.289	221.165	269.453	203.608	198.121	208.953	227.838	193.625	116.169
YGR209C	TRX2	471.234	458.839	510.588	478.647	351.913	439.044	329.543	457.35	341.157	221.486
YGR210C	YGR210C	193.917	133.49	162.242	212.1	117.429	167.844	171.723	139.062	155.258	168.137
YGR211W	ZPR1	203.978	81.0016	122.676	118.083	140.026	150.503	137.904	79.7466	157.732	169.874
YGR212W	SLI1	85.9653	115.791	143.487	91.4598	126.816	85.879	136.439	104.094	110.764	91.2187
YGR213C	RTA1	91.8925	124.722	185.83	115.235	109.42	96.4941	131.621	136.25	124.635	84.1847
YGR214W	RPS0A	588.74	501.43	348.649	381.503	362.889	319.81	276.655	369.422	330.592	315.631
YGR215W	RSM27	286.172	253.788	263.702	230.935	262.922	220.352	220.411	235.04	234.307	201.086
YGR216C	GPI1	142.729	143.897	128.931	114.048	123.418	106.401	149.804	166.213	132.914	189.762
YGR217W	CCH1	83.3227	82.2814	80.5153	91.0743	115.927	84.4507	104.82	100.055	111.626	105.811
YGR218W	CRM1	183.484	180.14	181.6	173.175	193.399	179.645	198.001	218.985	185.8	198.379
YGR220C	MRPL9	203.261	176.349	175.434	186.891	226.102	186.789	218.501	171.853	217.421	226.669
YGR221C	TOS2	133.227	106.071	127.56	131.217	172.395	111.65	114.372	116.839	113.574	115.185
YGR222W	PET54	217.487	218.771	172.83	192.821	176.959	186.318	149.647	204.562	204.287	161.124
YGR223C	HSV2	142.022	154.86	176.511	174.954	150.436	140.105	179.118	133.662	139.154	123.01
YGR224W	AZR1	88.3718	70.8963	67.6681	89.858	92.3412	62.279	99.9262	98.5171	111.23	79.2261
YGR225W	AMA1	39.479	45.4631	49.2942	61.5512	80.7176	34.4684	65.5003	68.9971	68.885	70.1298
YGR227W	DIE2	105.619	115.421	98.947	104.557	108.72	121.424	111.856	120.588	121.558	101.905
YGR229C	SMI1	200.319	130.779	146.249	157.063	125.883	166.477	158.943	130.032	163.168	189.19
YGR230W	BNS1	157.293	168.98	121.649	209.019	136.085	195.706	193.815	173.288	254.446	125.614
YGR231C	PHB2	185.213	180.703	173.649	241.042	213.248	177.323	178.309	225.981	251.629	234.658
YGR233C	PHO81	96.1068	97.71	90.8045	96.7897	103.706	91.7783	133.62	102.187	121.594	114.346
YGR234W	YHB1	135.059	79.6017	168.559	87.3356	209.465	102.099	112.622	97.8053	91.1903	113.439
YGR235C	YGR235C	179.673	145.032	168.056	162.434	175.089	204.837	187.481	149.246	167.257	196.364
YGR236C	SPG1	151.706	190.185	155.781	259.219	197.57	131.856	222.854	172.296	229.99	172.942
YGR238C	KEL2	88.4531	75.5689	78.2296	81.7377	90.9342	79.6888	108.023	95.3557	100.303	96.7216
YGR239C	PEX21	150.636	207.189	217.918	245.39	228.961	372.435	215.821	297.723	208.104	167.207
YGR240C	PFK1	403.242	295.16	265.519	269.146	322.516	297.557	301.288	349.307	335.111	357.247
YGR241C	YAP1802	210.055	160.83	164.923	221.052	122.898	159.537	135.931	176.693	159.976	122.987
YGR243W	FMP43	163.041	185.756	139.671	149.336	150.139	78.9687	202.981	179.415	157.751	60.0326
YGR244C	LSC2	164.774	139.8	167.635	190.923	128.828	145.968	155.737	151.231	137.104	156.308
YGR245C	SDA1	112.563	41.872	44.6769	68.1863	83.8162	74.8434	86.5069	68.3219	98.1901	80.653
YGR246C	BRF1	86.9047	68.7693	75.94	78.4551	90.7097	115.024	125.635	83.5669	110.042	86.0091
YGR247W	CPD1	107.187	129.136	102.166	156.431	99.9833	128.526	110.123	93.1887	103.271	126.211
YGR250C	YGR250C	103.544	121.44	141.737	121.868	115.757	125.012	137.31	121.45	111.474	126.125
YGR251W	YGR251W	120.189	81.2498	80.45	90.484	79.647	81.5146	101.659	103.236	97.9115	68.9987
YGR252W	GCN5	190.633	136.7	119.131	129.695	0.462087	156.453	1.31029	152.154	0.150058	0.36836
YGR253C	PUP2	331.643	198.854	250.023	254.769	261.913	286.014	207.039	238.141	247.055	187.247
YGR255C	COQ6	121.98	155.75	128.783	154.528	154.054	152.927	135.961	168.937	188.521	122.589
YGR256W	GND2	56.3432	69.386	79.7218	96.7064	97.2235	87.9896	85.6599	83.3289	82.9981	74.459
YGR257C	MTM1	133.849	151.191	167.54	180.559	165.01	261.875	215.071	180.635	178.529	171.009
YGR258C	RAD2	81.895	87.4333	84.192	89.6696	81.6383	75.5831	87.6295	101.952	107.336	71.2979
YGR261C	APL6	107.739	109.239	123.094	106.793	108.211	126.709	123.037	129.964	114.435	119.987
YGR262C	BUD32	111.136	95.0473	110.496	127.281	91.1352	84.3009	107.578	144.012	121.775	160.317
YGR263C	YGR263C	100.641	98.7395	105.151	102.889	77.2489	99.2326	86.8764	125.626	106.79	86.35
YGR264C	MES1	277.406	212.943	162.495	201.088	266.613	282.819	257.328	218.076	273.371	229.168
YGR266W	YGR266W	120.788	165.186	152.274	211.891	193.786	159.664	168.871	227.873	173.201	130.011
YGR268C	HUA1	249.28	303.625	444.02	487.474	174.48	381.918	197.435	289.381	224.277	242.442
YGR270W	YTA7	166.908	156.77	158.923	156.503	137.601	149.622	158.824	173.197	176.51	150.713
YGR271C-A	YGR271C-A	186.812	140.234	115.306	122.561	111.774	99.8196	208.101	132.19	149.075	152.727
YGR271W	SLH1	94.5998	98.1189	99.0191	92.4756	119.021	90.9888	128.849	118.3	126.324	114.72
YGR273C	YGR273C	76.892	65.8385	45.8421	54.0507	64.6782	93.9777	75.788	106.892	100.652	139.646
YGR274C	TAF1	99.2511	76.0396	86.8415	83.6534	92.5074	101.903	101.931	98.3883	97.854	100.651
YGR275W	RTT102	98.6719	82.6494	115.927	104.16	82.5559	116.126	91.2496	118.845	123.698	104.157
YGR276C	RNH70	87.9463	79.6136	90.5058	90.1186	97.467	112.033	123.875	90.8845	97.5174	83.3757
YGR277C	YGR277C	99.4693	93.6719	94.9446	105.166	70.6911	67.9678	114.1	115.414	73.7851	77.3666
YGR278W	CWC22	172.527	133.005	135.806	107.086	132.191	121.444	122.558	121.352	103.494	90.1171
YGR279C	SCW4	563.235	324.566	395.097	200.124	271.091	221.524	300.869	191.608	225.327	142.23
YGR280C	PXR1	153.605	81.6844	122.958	89.284	171.314	85.9026	132.059	56.9545	94.2738	91.2771
YGR281W	YOR1	139.425	163.874	125.689	114.947	166.52	113.945	164.954	119.256	122.875	105.474
YGR282C	BGL2	479.795	468.964	394.497	527.838	404.704	375.355	363.646	513.939	434.068	412.036
YGR283C	YGR283C	163.047	197.645	94.3146	166.731	159.166	155.744	155.385	184.716	162.892	127.304
YGR284C	ERV29	180.416	143.922	168.582	164.483	122.236	196.951	153.098	141.881	152.76	127.611
YGR285C	ZUO1	257.937	162.124	152.577	222.971	190.945	220.387	192.292	185.787	282.49	209.435
YGR287C	YGR287C	49.2572	52.6636	71.5379	86.6149	66.1848	45.8746	89.2021	85.6412	116.049	73.4006
YGR289C	MAL11	65.1381	50.4445	59.1283	66.3102	67.1447	68.593	73.5264	70.1581	71.9515	82.6274
YGR292W	MAL12	96.4542	84.889	84.8268	88.118	92.516	99.8168	116.432	102.007	119.243	108.278
YGR295C	COS6	211.203	204.917	214.409	225.652	290.96	221.807	203.7	270.194	202.356	188.274
YHL001W	RPL14B	719.867	687.111	486.245	477.295	458.9	416.619	363.546	551.423	470.123	378.088
YHL003C	LAG1	193.76	201.568	140.046	180.018	170.985	148.876	204.026	212.209	169.198	183.49
YHL004W	MRP4	188.163	171.483	192.328	189.338	192.222	154.235	197.698	170.007	163.979	147.658
YHL006C	SHU1	224.305	190.752	264.883	254.877	163.851	211.757	190.728	184.701	204.613	196.557
YHL007C	STE20	218.428	154.167	176.165	192.477	161.758	158.714	186.509	175.211	190.941	184.57
YHL008C	YHL008C	164.907	156.328	160.451	168.233	127.489	178.234	182.133	165.631	190.55	164.061
YHL009C	YAP3	100.611	114.382	105.711	97.235	161.987	126.816	128.481	110.765	115.049	166.104
YHL010C	YHL010C	112.255	116.858	108.035	137.181	94.8405	85.5934	153.623	130.181	112.343	97.5887
YHL011C	PRS3	267.188	164.173	130.024	186.049	168.643	170.886	193.201	163.03	228.862	222.778
YHL012W	YHL012W	99.0771	83.9091	76.2663	85.0763	109.039	88.1397	86.7317	91.5006	128.605	95.3967
YHL013C	OTU2	109.325	76.2509	80.6928	98.1934	112.137	87.9176	138.974	89.1557	77.0559	154.282
YHL014C	YLF2	250.251	234.5	181.482	189.37	250.654	151.868	171.289	251.805	181.115	155.921
YHL015W	RPS20	1182.01	960.125	575.107	699.936	485.78	461.924	453.724	691.471	440.476	423.109
YHL017W	YHL017W	144.379	139.101	125.802	154.581	160.164	125.555	186.444	145.242	169.1	143.721
YHL018W	YHL018W	190.59	146.556	148.505	164.32	129.947	134.709	144.241	167.604	180.54	138.122
YHL019C	APM2	144.283	113.882	131.286	120.431	107.891	87.3357	113.325	111.692	94.5715	73.9656
YHL020C	OPI1	279.253	406.378	393.565	537.529	172.611	288.511	203.485	399.259	249.305	194.796
YHL023C	RMD11	109.859	103.526	116.371	103.395	104.667	105.035	137.793	120.729	127.866	111.084
YHL024W	RIM4	127.719	107.957	119.732	115.49	101.725	121.414	114.857	104.528	146.999	114.533
YHL025W	SNF6	321.59	231.872	319.636	377.033	248.857	186.657	255.58	259.049	271.912	187.937
YHL026C	YHL026C	182.573	210.99	249.836	298.058	198.814	218.321	160.602	221.084	270.722	156.637
YHL029C	OCA5	194.454	218.987	218.703	267.049	233.101	256.12	256.432	273.938	275.163	232.306
YHL030W	ECM29	111.595	75.2543	66.4828	80.3201	84.7495	75.9535	116.675	101.148	113.154	94.0654
YHL031C	GOS1	141.161	124.515	132.751	161.659	148.024	87.1425	140.866	155.6	127.912	105.226
YHL032C	GUT1	98.5102	89.9478	98.8754	124.737	127.559	81.4833	117.327	95.3753	92.444	84.5494
YHL033C	RPL8A	1690.65	1630.27	1177.48	1414.07	1016.43	769.207	860.702	1328.04	901.26	831.185
YHL034C	SBP1	204.551	292.075	256.79	257.92	201.345	230.376	204.213	243.425	169.665	162.138
YHL038C	CBP2	101.325	106.28	105.54	122.973	116.642	139.064	115.986	125.309	128.338	189.595
YHL039W	YHL039W	119.389	79.2923	87.693	86.388	110.427	140.771	142.641	99.28	100.706	110.34
YHL040C	ARN1	92.4613	73.7842	120.239	88.5105	108.479	124.489	113.209	97.2458	100.288	108.548
YHL046C	PAU13	33.3187	32.372	38.3276	69.7302	50.9511	34.1778	111.842	123.298	84.1027	103.828
YHL048W	COS8	72.4701	81.8314	126.372	121.073	94.0268	102.128	106.313	126.189	110.086	132.729
YHL049C	YHL049C	84.4434	59.2815	102.21	83.1649	88.7608	105.464	109.267	100.203	112.789	121.916
YHR001W	OSH7	134.009	127.848	134.543	142.328	147.499	142.94	151.93	134.52	142.573	114.985
YHR001W-A	QCR10	256.947	244.84	185.861	243.171	401.843	211.392	285.138	176.253	170.079	240.486
YHR002W	LEU5	158.308	165.803	131.767	196.599	164.64	149.065	212.541	160.943	190.891	163.495
YHR003C	YHR003C	167.119	139.637	128.592	127.587	158.911	118.6	136.513	134.21	147.347	96.8279
YHR004C	NEM1	140.07	142.304	126.784	156.623	118.564	155.602	141.106	156.072	132.805	145.369
YHR005C	GPA1	309.563	375.015	227.452	216.619	186.831	187.064	157.503	265.713	137.705	113.062
YHR005C-A	MRS11	865.225	785.053	448.572	476.014	320.61	439.804	326.67	509.777	304.34	333.536
YHR007C	ERG11	414.215	345.074	382.437	479.084	366.164	364.724	330.14	422.052	338.443	242.836
YHR007C-A	YHR007C-A	330.19	394.163	258.37	570.131	229.873	350.282	385.606	350.286	378.739	222.623
YHR008C	SOD2	318.061	338.212	282.003	527.574	165.926	263.164	187.731	340.319	303.705	183.516
YHR009C	YHR009C	187.698	202.145	206.798	225.903	175.162	176.118	181.858	183.063	162.547	132.671
YHR010W	RPL27A	899.703	767.751	495.261	526.358	420.027	403.147	450.669	581.653	416.387	384.206
YHR012W	VPS29	136.95	126.63	143.839	142.905	124.759	122.879	133.422	122.927	117.832	103.24
YHR013C	ARD1	193.814	162.105	169.538	179.886	122.738	124.241	142.821	183.276	202.192	119.425
YHR014W	SPO13	65.6368	69.039	75.3185	80.0394	93.7954	74.2973	119.13	87.7652	77.0281	96.1245
YHR021C	RPS27B	940.135	854.916	506.193	546.057	560.474	528.814	402.915	638.878	478.491	461.715
YHR023W	MYO1	138.655	169.608	129.693	100.544	166.825	129.574	177.736	157.829	143.311	171.704
YHR025W	THR1	193.784	298.885	242.993	307.431	311.251	343.906	216.407	352.519	296.626	254.862
YHR026W	PPA1	251.86	197.515	202.975	215.975	214.617	226.53	227.185	267.185	185.767	273.065
YHR027C	RPN1	251.515	178.011	184.658	210.564	173.168	195.982	214.772	184.126	196.086	222.549
YHR028C	DAP2	218.137	266.169	225.662	225.972	194.951	216.655	215.637	248.588	220.589	175.343
YHR031C	RRM3	106.099	105.713	94.5645	110.196	121.459	97.845	112.99	119.883	124.192	156.164
YHR032W	YHR032W	127.157	100.133	113.965	168.212	103.43	141.287	97.5144	150.906	100.076	106.246
YHR033W	YHR033W	121.722	99.7664	103.789	161.095	114.289	74.6675	129.33	125.872	90.9424	133.777
YHR034C	PIH1	89.5335	88.1284	93.964	123.112	82.4099	142.555	107.393	104.04	113.026	105.644
YHR035W	YHR035W	102.746	86.3137	83.5498	97.2857	114.734	74.5055	106.132	116.656	111.635	92.0258
YHR036W	BRL1	152.814	108.114	135.769	141.102	116.849	157.097	177.062	117.52	129.99	131.25
YHR037W	PUT2	139.077	189.419	193.196	173.183	138.236	138.563	183.461	183.05	162.559	138.532
YHR038W	RRF1	167.436	163.865	140.929	120.253	137.924	130.965	168.886	189.205	132.142	129.878
YHR039C	MSC7	153.44	135.683	146.592	167.779	118.798	155.814	180.581	173.504	143.163	139.041
YHR039C-A	VMA10	411.996	357.508	276.633	391.354	291.188	282.184	299.893	333.29	310.186	371.017
YHR040W	BCD1	95.5831	61.8063	78.4331	115.341	109.493	90.0984	147.927	76.7367	108.164	119.087
YHR041C	SRB2	135.134	108.379	160.921	203.116	158.869	106.805	114.092	134.879	126.293	193.014
YHR042W	NCP1	163.818	118.736	188.811	200.826	125.643	242.094	157.326	168.827	173.504	177.256
YHR043C	DOG2	146.269	109.021	120.547	155.421	133.673	124.201	223.954	132.97	130.456	113.891
YHR044C	DOG1	72.1948	83.8056	83.5039	91.0147	104.925	131.184	117.044	107.235	131.529	169.691
YHR045W	YHR045W	113.71	95.7376	111.735	112.059	101.438	138.667	146.025	128.304	150.59	140.752
YHR046C	INM1	150.293	151.531	134.268	158.36	206.204	217.901	125.279	184.209	176.131	132.774
YHR048W	YHR048W	94.0972	100.44	107.769	109.328	146.154	144.006	113.18	132.748	170.469	148.492
YHR049W	FSH1	220.835	151.383	171.053	160.129	131.721	165.286	205.075	170.379	155.311	145.064
YHR050W	SMF2	136.407	89.2049	139.333	131.07	95.6766	149.975	125.175	112.196	137.659	164.221
YHR050W-A	YHR050W-A	277.705	247.382	282.376	199.404	382.38	185.808	225.46	199.383	168.34	157.927
YHR051W	COX6	235.599	230.374	229.59	205.914	146.546	212.086	272.501	196.602	151.812	215.138
YHR052W	CIC1	184.58	87.0335	77.5616	88.2487	106.948	118.108	126.388	96.4399	153.592	120.563
YHR056C	RSC30	204.189	187.802	245.223	181.446	344.244	259.569	419.148	265.175	349.244	384.888
YHR057C	CPR2	146.37	117.099	151.939	179.203	188.545	125.238	126.503	168.968	132.003	106.181
YHR058C	MED6	129.655	113.579	111.963	133.325	85.6718	102.875	123.631	120.404	95.6332	81.5373
YHR059W	FYV4	154.98	161.576	139.294	120.504	126.15	154.676	166.863	165.186	216.426	208.217
YHR060W	VMA22	215.648	216.419	173.738	156.147	140.103	139.616	146.512	178.702	185.765	128.25
YHR061C	GIC1	210.153	171.952	152.594	145.921	133.595	188.818	163.423	185.442	170.108	136.045
YHR062C	RPP1	188.688	114.578	108.887	117.831	90.3981	127.24	109.471	120.082	89.5961	132.635
YHR063C	PAN5	124.604	118.976	100.152	110.966	129.387	153.302	136.459	145.664	104.099	120.157
YHR064C	SSZ1	195.793	127.094	119.352	154.726	147.249	190.137	179.446	135.047	170.734	170.563
YHR065C	RRP3	141.024	101.547	79.8324	93.8542	133.949	124.184	129.217	76.5937	116.34	99.586
YHR066W	SSF1	161.477	68.2073	65.113	90.3368	103.131	101.982	110.229	71.6988	107.1	107.596
YHR067W	HTD2	246.763	160.942	188.893	173.141	132.111	150.83	152.772	187.466	173.706	147.074
YHR068W	DYS1	185.993	133.207	147.168	136.58	133.059	146.996	142.147	139.264	146.461	193.635
YHR069C	RRP4	162.34	90.743	99.8523	177.227	107.26	113.902	112.217	124.178	137.811	87.6761
YHR070W	TRM5	136.045	87.2064	129.789	196.576	100.291	181.265	104.896	109.316	128.653	159.122
YHR072W	ERG7	134.256	165.013	166.271	147.071	171.525	238.701	180.035	221.364	215.072	170.482
YHR072W-A	NOP10	484.876	326.214	212.015	281.256	279.676	287.009	305.302	273.96	310.876	260.437
YHR073W	OSH3	150.565	130.307	151.088	148.206	184.11	149.114	148.83	147.554	177.604	131.471
YHR074W	QNS1	120.643	120.489	148.627	158.257	171.197	125.209	136.173	138.407	160.138	166.841
YHR075C	PPE1	110.268	130.352	111.336	129.13	124.476	116.267	154.55	138.057	108.19	121.969
YHR076W	PTC7	146.937	151.451	145.505	150.253	175.403	137.389	126.774	140.358	118.78	134.462
YHR077C	NMD2	168.984	141.719	120.357	125.61	160.679	117.376	165.431	141.473	150.234	158.877
YHR078W	YHR078W	131.055	150.61	141.423	146.097	158.882	128.072	159.523	138.283	162.356	155.373
YHR079C	IRE1	137.332	125.051	127.486	128.19	170.544	134.984	148.928	140.252	171.283	146.22
YHR079C-A	SAE3	40.9921	58.3739	69.9728	50.8266	101.795	41.2287	64.3239	63.4513	67.9347	50.4515
YHR080C	YHR080C	102.354	138.494	130.477	155.23	153.419	115.029	164.616	164.99	164.567	114.417
YHR081W	LRP1	145.935	132.443	154.164	118.114	141.206	111.385	157.69	137.395	157.764	204.087
YHR082C	KSP1	210.46	194.543	219.93	188.539	182.705	202.018	254.843	186.299	191.523	234.729
YHR083W	SAM35	217.627	276.101	139.897	170.239	111.049	135.671	124.194	141.788	132.39	99.8337
YHR084W	STE12	163.587	201.158	88.4865	109.182	107.726	109.543	110.077	155.035	109.423	90.6755
YHR085W	IPI1	132.292	103.602	96.1958	101.152	84.7998	96.9727	128.689	97.6552	121.215	79.2943
YHR086W	NAM8	161.358	145.384	155.477	173.271	180.106	118.461	175.494	134.652	160.899	112.063
YHR088W	RPF1	164.202	113.747	70.3811	78.8378	142.935	116.234	110.811	124.569	119.668	141.041
YHR089C	GAR1	249.517	132.517	85.9368	131.596	129.44	151.061	120.064	104.646	130.61	198.167
YHR090C	YNG2	156.899	184.501	137.959	147.739	159.584	218.054	213.32	196.45	246.401	208.556
YHR091C	MSR1	123.015	106.454	118.502	110.702	130.615	127.74	136.95	136.142	136.155	133.655
YHR092C	HXT4	80.7834	63.7413	100.309	103.829	108.821	123.571	92.2407	86.9719	109.05	119.79
YHR094C	HXT1	780.089	1035.88	905.276	1470.61	1090.92	577.37	806.111	688.522	663.053	442.208
YHR098C	SFB3	197.743	141.343	172.205	169.064	150.065	157.036	173.897	172.699	152.522	146.164
YHR099W	TRA1	140.97	109.447	171.89	119.647	146.404	163.43	155.793	130.052	147.216	168.723
YHR100C	YHR100C	159.187	149.393	174.437	182.578	175.774	184.57	174.895	162.047	199.241	279.058
YHR101C	BIG1	125.818	117.454	98.4133	112.219	125.251	142.569	155.516	147.436	126.768	162.035
YHR102W	KIC1	169.479	101.344	134.953	124.635	129.177	152.9	146.739	103.8	112.87	163.901
[truncated: 2,746 more rows]

## Sheet: 5783genes_Rpb3 avg
Rpb3 Occ. averaged over CDS for all genes
Systematic name	Common name	WT-U	WT-I	ydj1∆-I	snf2∆-I	gcn5∆-I	snf2∆ydj1∆/lcGCN4-I	gcn5∆ydj1∆-I	Ptet-SNF2-I	Ptet-SNF2gcn5∆-I	Ptet-SNF2gcn5∆ydj1∆/lcGCN4-I
YAL001C	TFC3	123.285	124.752	124.096	116.761	134.952	141.97	144.593	153.421	134.36	144.732
YAL002W	VPS8	124.008	119.577	104.878	125.328	167.741	122.276	152.204	145.664	140.624	134.994
YAL003W	EFB1	1162.97	516.365	487.529	351.855	401.368	396.539	353.839	280.71	332.396	371.782
YAL005C	SSA1	807.531	419.557	1483.49	453.53	391.232	700.93	923.806	259.139	381.074	863.823
YAL007C	ERP2	180.639	170.163	144.069	142.078	144.847	166.419	162.252	158.562	190.364	140.097
YAL008W	FUN14	162.675	187.927	185.713	171.383	128.922	128.493	158.071	154.209	145.822	121.065
YAL009W	SPO7	102.349	119.119	101.335	112.51	110.091	76.5068	94.7981	111.526	128.074	159.705
YAL010C	MDM10	106.475	106.957	101.194	110.851	123.655	88.3348	130.783	134.25	147.163	94.1005
YAL011W	SWC3	120.686	119.311	136.988	124.855	116.961	136.436	122.927	138.202	167.32	122.67
YAL012W	CYS3	266.966	243.058	179.053	220.518	187.717	248.279	161.897	289.499	212.948	175.403
YAL013W	DEP1	102.59	119.55	168.197	201.375	132.42	161.188	156.038	178.631	136.048	145.639
YAL014C	SYN8	131.695	199.878	209.293	246.025	132.513	233.953	153.585	229.66	166.839	161.805
YAL015C	NTG1	118.693	156.272	158.048	203.4	117.844	166.478	147.981	180.039	118.416	220.754
YAL016W	TPD3	204.89	198.78	202.398	232.331	184.954	201.02	208.38	226.717	251.303	264.284
YAL017W	PSK1	123.306	168.002	164.717	167.034	172.372	139.114	182.148	174.561	185.723	159.23
YAL018C	YAL018C	35.8763	44.6773	93.9079	70.4191	57.5161	32.0634	78.9246	61.9852	61.6439	46.8837
YAL019W	FUN30	104.785	91.0124	93.1522	120.626	131.103	145.119	112.574	116.649	146.915	132.753
YAL020C	ATS1	81.5538	72.4231	94.9545	144.449	125.684	94.9867	65.6748	70.6265	87.8382	93.6173
YAL021C	CCR4	142.173	120.487	163.538	181.453	136.509	125.059	157.34	150.543	131.13	120.295
YAL022C	FUN26	108.104	110.97	163.734	158.036	117.131	173.748	125.175	143.895	129.768	186.239
YAL023C	PMT2	245.837	121.033	179.838	185.016	125.12	142.983	159.22	162.057	170.899	141.812
YAL024C	LTE1	99.798	67.5701	72.4449	83.5431	103.664	76.7853	118.456	93.3271	114.529	98.569
YAL025C	MAK16	175.113	85.6214	72.0145	115.402	126.248	108.288	82.7296	102.731	105.383	91.6992
YAL026C	DRS2	98.5065	146.023	126.963	116.954	169.139	184.521	149.298	156.988	132.426	120.268
YAL027W	YAL027W	110.963	146.741	126.612	127.819	126.009	141.725	90.6839	131.419	128.057	111.194
YAL028W	FRT2	80.4463	173.474	156.425	193.709	118.347	85.1215	126.134	181.491	157.308	196.415
YAL029C	MYO4	144.318	117.962	112.192	124.88	126.188	122.161	137.604	123.689	135.246	127.352
YAL030W	SNC1	192.931	212.386	227.64	212.027	255.138	146.993	191.521	169.218	194.4	205.808
YAL031C	GIP4	110.672	140.114	125.326	140.358	136.438	117.332	128.327	125.257	158.964	115.131
YAL032C	PRP45	139.613	139.461	153.109	210.075	173.647	130.691	143.48	163.796	175.227	176.103
YAL033W	POP5	156.677	118.08	129.184	133.255	121.017	150.101	161.154	115.795	177.921	101.816
YAL034C	FUN19	149.636	209.485	163.791	244.854	151.163	164.527	192.555	176.436	161.725	177.752
YAL034W-A	MTW1	142.672	134.816	122.557	134.21	112.31	119.382	139.703	125.606	117.645	92.0347
YAL035W	FUN12	237.707	149.989	159.104	184.596	194.505	208.34	146.795	140.762	175.138	164.953
YAL036C	RBG1	149.514	95.6001	99.396	130.998	109.5	156.583	107.619	133.343	180.692	118.676
YAL037W	YAL037W	106.455	96.1772	92.2085	109.741	137.403	124.983	123.839	127.191	140.099	144.597
YAL038W	CDC19	1737.61	1117.18	1044.35	712.357	987.987	916.487	791.161	1194.79	825.778	1099.23
YAL039C	CYC3	157.462	147.296	245.9	430.194	119.724	262.396	189.451	160.248	223.822	226.073
YAL040C	CLN3	451.957	299	338.958	368.441	227.622	253.282	321.27	165.744	157.71	190.891
YAL041W	CDC24	203.698	183.218	173.368	193.173	187.173	188.316	180.922	171.056	173.898	186.512
YAL042W	ERV46	178.487	148.434	167.987	248.263	121.406	174.427	174.452	167.923	227.712	136.261
YAL043C	PTA1	133.826	138.568	145.279	193.944	163.317	176.023	152.696	177.845	170.404	155.34
YAL044C	GCV3	244.602	414.145	325.43	379.742	246.695	285.59	202.272	362.648	196.84	173.181
YAL044W-A	YAL044W-A	183.737	327.138	239.261	237.054	154.634	190.996	200.901	298.604	164.485	96.004
YAL046C	YAL046C	119.795	134.487	195.836	153.714	136.834	214.936	160.025	158.005	158.995	173.755
YAL047C	SPC72	70.4178	96.1004	81.9113	106.26	132.981	128.595	114.465	101.202	126.412	116.907
YAL048C	GEM1	89.8881	204.802	175.029	139.535	179.967	151.008	206.462	182.185	158.927	144.94
YAL049C	YAL049C	131.811	215.261	182.227	172.712	227.229	147.4	209.301	164.232	145.828	235.787
YAL051W	OAF1	105.395	104.083	97.4765	102.037	118.14	101.394	144.513	124.661	122.205	140.259
YAL053W	FLC2	129.689	138.615	144.231	199.054	155.919	134.373	149.811	176.396	160.418	180.259
YAL054C	ACS1	74.6218	76.5297	98.0018	111.7	85.2897	101.593	109.152	95.2798	137.998	123.677
YAL055W	PEX22	126.163	109.212	118.687	138.628	120.746	141.156	134.764	135.848	104.477	110.534
YAL056W	GPB2	127.662	120.285	143.999	138.352	142.871	133.372	147.949	130.29	181.524	256.257
YAL058W	CNE1	69.5488	72.5966	92.0118	84.4154	80.8909	84.2147	99.7806	76.7216	84.9033	85.4143
YAL059W	ECM1	158.2	119.534	95.6154	104.084	147.921	115.352	93.784	127.434	127.505	110.961
YAL060W	BDH1	261.435	338.753	296.29	256.874	177.336	195.745	216.937	296.362	177.935	199.831
YAL061W	YAL061W	185.076	330.632	286.051	308.839	203.774	218.716	214.303	233.207	246.548	130.781
YAL062W	GDH3	130.438	149.34	167.345	206.092	222.153	142.59	138.528	176.719	139.143	128.213
YAL063C	FLO9	50.4427	46.5248	72.8258	86.6051	53.2031	68.1953	71.3055	73.4239	77.5271	69.2158
YAL063C-A	YAL063C-A	32.1409	34.101	66.1079	37.286	54.139	33.2588	53.3064	49.4407	59.622	79.6925
YAL064C-A	YAL064C-A	78.6008	77.8599	86.8982	135.194	185.611	74.7796	157.516	133.232	94.2106	91.4161
YAL064W	YAL064W	35.905	38.7563	67.0531	43.8669	47.8709	76.9619	81.3081	57.8496	63.56	128.697
YAL064W-B	YAL064W-B	88.8796	95.0295	111.457	156.654	73.911	116.293	122.49	114.069	103.095	125.332
YAL065C	YAL065C	75.2294	89.8763	105.706	97.3044	102.834	122.379	120.682	88.6228	98.7478	106.57
YAL067C	SEO1	38.2045	39.7973	68.3868	56.0869	90.9302	110.14	66.8047	66.9578	69.3958	65.5505
YAL067W-A	YAL067W-A	34.1686	29.7145	24.0439	35.0378	38.0108	49.3211	122.886	54.2692	94.7274	42.9495
YAL068C	PAU8	24.177	28.6977	53.1712	45.4048	76.8245	26.203	45.2084	45.8927	53.4016	25.63
YAR002C-A	ERP1	198.245	142.867	174.967	146.147	144.333	159.022	157.873	132.901	132.267	155.188
YAR002W	NUP60	199.616	158.259	153.913	141.129	135.211	193.24	149.026	128.184	135.676	203.915
YAR003W	SWD1	135.862	110.807	109.373	134.129	125.838	111.967	185.374	125.238	131.885	147.926
YAR007C	RFA1	151.577	80.485	106.23	86.6806	101.301	122.729	142.498	94.7353	122.227	124.354
YAR008W	SEN34	108.72	46.5891	66.6606	73.0473	96.9531	77.2954	99.3151	98.6091	99.9586	96.5616
YAR009C	YAR009C	246.958	281.496	314.397	151.446	218.994	172.971	182.341	192.428	171.02	145.745
YAR010C	YAR010C	275.734	322.487	335.58	206.36	185.596	203.38	188.379	239.261	202.803	191.235
YAR014C	BUD14	137.875	118.295	99.8682	153.665	128.915	165.131	137.8	179.615	155.552	128.249
YAR015W	ADE1	141.383	159.051	138.278	175.964	181.333	176.804	224.569	198.408	183.442	137.103
YAR018C	KIN3	120.665	112.899	103.283	112.07	132.252	121.071	126.854	127.984	145.344	149.883
YAR019C	CDC15	86.5802	85.7536	85.2827	113.213	93.5062	94.4305	104.265	103.642	113.341	100.301
YAR023C	YAR023C	96.9064	122.073	114.418	140.38	88.7832	132.983	133.938	129.606	85.6387	123.823
YAR027W	UIP3	149.149	232.193	257.009	197.845	162.823	217.072	183.612	228.857	228.077	149.132
YAR028W	YAR028W	87.3214	106.924	148.402	127.95	124.735	106.874	163.683	155.819	122.197	121.019
YAR029W	YAR029W	78.5572	86.0165	83.7201	125.108	114.006	114.602	118.61	118.532	111.396	109.036
YAR031W	PRM9	98.3089	110.639	149.56	150.916	176.164	135.91	119.869	128.315	111.631	135.226
YAR033W	MST28	105.685	92.2014	104.26	118.882	80.0732	105.202	137.855	104.397	159.339	138.808
YAR035W	YAT1	28.4363	37.9662	100.442	112.74	134.82	110.865	133.29	87.5587	159.614	378.345
YAR042W	SWH1	125.101	99.8198	112.496	158.259	115.639	142.581	152.375	106.986	129.387	143.077
YAR050W	FLO1	58.9926	59.0138	96.7132	115.651	82.1594	96.7433	87.3376	89.1549	99.3742	99.8217
YAR061W	YAR061W	62.8291	56.3344	53.5085	63.991	92.7397	63.0284	85.7986	88.5069	109.058	82.8643
YAR062W	YAR062W	47.4137	49.158	67.1886	65.5643	69.8648	49.4578	73.2157	64.7041	95.968	81.4689
YAR064W	YAR064W	63.6582	48.2023	98.975	59.2259	63.2823	67.0791	66.2038	78.3213	63.8215	75.1707
YAR066W	YAR066W	70.2586	50.3837	92.0746	79.5622	67.1561	90.0423	106.975	83.4148	87.3392	118.866
YAR068W	YAR068W	78.8874	64.1292	112.29	106.631	66.2359	112.756	87.1058	76.32	109.243	122.086
YAR071W	PHO11	50.9186	40.1106	60.3643	66.477	46.7721	56.4532	62.7426	63.3985	62.183	88.0968
YBL001C	ECM15	701.621	750.087	819.675	591.959	750.58	539.016	618.016	583.668	572.612	253.121
YBL002W	HTB2	1218.08	1052.68	1080.37	842.571	996.448	709.964	990.349	819.141	696.319	501.227
YBL003C	HTA2	1395.79	1209.6	1141.83	999.799	857.054	693.922	1135.37	700.84	680.476	489.121
YBL004W	UTP20	162.32	83.7226	77.7536	88.5794	150.518	110.061	120.927	95.6094	138.96	131.666
YBL005W	PDR3	188.017	243.906	248.356	137.313	195.577	155.548	165.882	205.528	157.362	134.152
YBL005W-A	YBL005W-A	151.517	218.207	244.82	157.925	191.929	220.857	177	219.879	180.028	198.348
YBL005W-B	YBL005W-B	209.126	271.143	291.563	159.798	237.306	211.996	193.928	226.446	189.301	173.158
YBL006C	LDB7	187.876	153.795	220.316	223.21	171.707	134.185	142.141	169.672	152.223	149.466
YBL007C	SLA1	184.55	187.894	231.53	268.803	195.858	173.005	233.168	197.365	212.548	192.927
YBL008W	HIR1	73.2658	61.9367	72.5816	85.0737	78.6602	78.3632	97.9103	100.137	100.579	87.9992
YBL008W-A	YBL008W-A	129.388	66.3516	66.6011	52.8372	168.572	148.919	118.966	91.8094	99.3716	69.428
YBL009W	YBL009W	127.772	67.0986	76.595	77.0518	97.3888	109.397	117.523	98.557	114.014	112.836
YBL010C	YBL010C	141.482	102.088	99.3989	149.741	129.135	79.6573	140.33	116.904	110.789	91.5548
YBL011W	SCT1	183.066	130.199	154.388	188.99	188.21	164.872	167.832	156.261	177.253	176.45
YBL013W	FMT1	96.5949	78.9023	106.492	123.743	82.4428	83.6696	99.5774	85.1346	97.7631	96.1624
YBL014C	RRN6	124.954	87.125	99.4342	105.425	117.078	128.939	121.523	96.7137	120.67	143.684
YBL015W	ACH1	82.3265	89.9265	174.718	186.426	119.602	123.829	175.625	113.068	172.435	122.299
YBL016W	FUS3	160.525	190.866	142.938	185.525	106.545	134.286	130.71	133.019	118.773	94.4657
YBL017C	PEP1	184.402	184.863	218.126	180.99	172.092	157.576	166.87	192.495	158.251	153.186
YBL018C	POP8	164.224	155.082	185.453	150.928	303.481	222.299	257.29	188.131	288.549	185.266
YBL019W	APN2	108.792	104.188	109.624	119.427	149.182	108.424	149.732	131.157	177.333	121.462
YBL020W	RFT1	106.81	78.479	95.7545	104.021	110.358	92.1716	104.521	84.3739	104.752	102.927
YBL021C	HAP3	108.18	90.4402	128.835	140.982	79.7724	135.755	166.166	100.868	129.823	122.958
YBL022C	PIM1	165.399	122.992	151.209	142.33	164.827	150.899	152.405	144.348	145.394	151.53
YBL023C	MCM2	109.13	84.542	107.853	102.681	105.061	140.661	120.83	114.085	111.492	120.14
YBL024W	NCL1	192.034	135.546	125.968	130.944	160.221	137.843	131.109	144.14	181.002	141.695
YBL025W	RRN10	146.641	131.246	156.784	131.554	130.286	100.795	150.115	149.525	133.293	80.2393
YBL026W	LSM2	226.88	238.029	237.998	171.873	126.488	152.731	173.455	182.854	151.613	157.203
YBL027W	RPL19B	894.722	826.575	551.054	673.958	541.033	507.461	438.005	584.152	499.248	442.362
YBL028C	YBL028C	195.456	118.244	80.255	66.5984	90.6184	127.062	108.775	87.3202	108.997	76.8542
YBL029C-A	YBL029C-A	288.086	271.924	191.461	422.178	231.744	402.622	321.727	229.1	237.301	211.753
YBL029W	YBL029W	177.919	139.58	123.744	167.311	134.002	161.551	189.793	150.372	141.332	151.265
YBL030C	PET9	447.082	352.509	305.216	475.379	265.957	345.263	350.851	292.538	390.076	377.763
YBL031W	SHE1	190.697	129.881	153.951	141.496	167.353	147.558	131.44	154.528	154.021	134.908
YBL032W	HEK2	180.895	103.788	145.438	153.062	125.034	86.4283	116.851	146.6	98.93	166.732
YBL033C	RIB1	153.188	250.656	294.258	412.431	179.603	422.677	211.068	394.617	232.72	180.939
YBL034C	STU1	101.459	78.6816	87.5534	90.0153	116.318	95.341	119.562	84.5775	107.12	87.61
YBL035C	POL12	143.515	77.6508	94.4687	86.4973	106.597	106.316	122.584	106.809	122.32	105.24
YBL036C	YBL036C	183.978	139.588	142.898	155.207	179.775	115.18	193.299	140.583	136.25	124.695
YBL037W	APL3	127.181	99.6951	109.177	108.894	161.418	120.42	126.244	131.256	131.837	130.997
YBL038W	MRPL16	200.554	168.061	175.753	175.603	180.962	187.497	188.908	172.749	187.903	301.764
YBL039C	URA7	216.965	72.1641	67.5636	117.524	151.219	119.528	102.116	90.6386	126.486	107.374
YBL039W-B	YBL039W-B	105.074	147.308	100.545	117.916	112.463	130.096	150.3	101.776	114.657	217.591
YBL040C	ERD2	245.754	213.75	168.227	217.476	168.92	226.152	186.722	264.563	203.306	187.955
YBL041W	PRE7	345.679	235.674	212.851	308.465	223.278	262.295	271.377	282.145	215.539	232.599
YBL042C	FUI1	237.52	135.805	102.016	238.944	154.869	176.466	148.23	151.504	186.935	209.236
YBL043W	ECM13	46.175	272.301	196.525	294.875	290.247	360.275	354.911	193.355	167.911	218.551
YBL044W	YBL044W	17.7746	16.8758	26.4692	43.1328	16.2625	22.2704	26.3448	49.77	44.3789	42.7835
YBL045C	COR1	214.159	189.752	184.781	251.807	162.185	204.241	282.173	205.457	178.551	207.704
YBL046W	PSY4	102.159	97.8456	110.664	137.912	109.988	108.412	130.018	103.419	138.639	227.434
YBL047C	EDE1	191.756	214.536	219.842	249.066	187.795	192.348	213.658	219.908	238.351	216.409
YBL049W	MOH1	102.623	109.87	150.327	134.925	105.174	124.081	124.799	129.187	131.034	132.647
YBL050W	SEC17	183.907	223.333	177.432	216.916	152.479	211.697	187.539	260.721	218.397	246.363
YBL051C	PIN4	174.498	154.323	142.961	156.401	177.702	171.826	197.047	173.495	173.977	168.136
YBL052C	SAS3	116.605	100.983	87.9288	91.4785	112.643	85.6049	128.061	94.3069	113.08	120.516
YBL054W	YBL054W	89.0568	53.6907	66.2944	91.2391	115.058	104.961	79.8976	56.7805	96.8449	105.961
YBL055C	YBL055C	167.064	148.092	166.357	161.574	179.056	139.584	194.17	158.661	175.84	174.056
YBL056W	PTC3	273.277	264.905	261.553	252.121	344.183	222.117	254.235	231.655	287.146	207.202
YBL057C	PTH2	180.576	184.243	215.76	222.473	177.894	213.832	226.935	182.185	193.301	182.551
YBL058W	SHP1	233.941	212.753	209.702	268.429	173.024	207.648	202.533	233.144	239.222	211.477
YBL059C-A	YBL059C-A	131.905	148.903	113.853	108.36	234.948	124.087	160.272	128.616	198.783	141.103
YBL059W	YBL059W	150.549	139.385	165.017	133.632	147.046	170.356	158.495	146.172	141.998	105.219
YBL060W	YBL060W	102.1	90.9629	99.129	91.6472	100.949	125.405	123.875	100.14	100.167	118.31
YBL061C	SKT5	140.942	129.659	112.14	117.848	118.71	111.188	124.658	136.626	137.305	216.613
YBL063W	KIP1	99.8295	57.1591	63.0043	64.9972	97.3105	71.7782	88.8145	69.5866	90.1087	86.3874
YBL064C	PRX1	148.034	202.584	211.3	235.615	155.964	140.653	174.379	242.248	184.487	163.747
YBL066C	SEF1	115.287	137.468	128.583	159.061	167.283	123.892	157.534	147.326	147.673	167.623
YBL067C	UBP13	104.497	85.0011	103.052	92.1797	96.8792	118.306	98.4382	114.523	114.332	99.4318
YBL068W	PRS4	120.806	93.301	90.3285	100.589	170.373	162.965	98.6643	114.813	115.453	224.038
YBL069W	AST1	170.298	139.078	130.8	148.415	136.964	138.37	146.893	128.718	133.361	113.022
YBL071W-A	KTI11	208.1	129.398	97.9586	171.159	234.544	166.422	148.024	138.338	164.622	137.737
YBL072C	RPS8A	849.715	796.446	552.167	650.299	462.163	550.014	448.762	678.415	465.572	354.516
YBL074C	AAR2	124.876	137.867	119.823	141.947	112.424	113.111	101.941	137.479	144.106	101.98
YBL075C	SSA3	101.127	105.564	119.429	122.052	146.824	108.376	126.848	111.48	115.081	125.818
YBL076C	ILS1	328.83	466.379	394.585	481.124	501.798	534.878	392.288	483.38	495.666	403.183
YBL078C	ATG8	122.582	201.642	137.705	151.317	195.157	101.475	169.642	227.566	144.484	146.323
YBL079W	NUP170	167.073	117.793	133.9	127.817	128.966	135.321	141.613	142.269	158.428	167.294
YBL080C	PET112	108.312	92.1634	97.6664	117.417	94.4521	117.835	127.92	112.407	110.586	166.897
YBL081W	YBL081W	165.781	97.4216	131.366	146.496	130.793	154.515	147.641	156.196	156.937	144.841
YBL082C	ALG3	75.8938	48.8208	81.4037	105.646	77.4603	85.5415	78.0422	100.555	74.0572	141.724
YBL084C	CDC27	126.952	120.427	113.426	140.223	133.117	129.529	157.21	127.429	158.98	167.197
YBL085W	BOI1	147.354	118.436	125.85	140.034	113.758	129.957	134.969	141.028	135.205	132.067
YBL086C	YBL086C	91.433	110.389	96.0482	149.957	144.501	109.988	134.926	154.355	197.558	121.203
YBL087C	RPL23A	569.074	461.953	326.283	350.635	300.945	296.82	217.081	366.381	265.144	268.616
YBL088C	TEL1	100.985	109.992	104.941	97.5375	101.036	101.643	113.637	128.056	107.861	97.893
YBL089W	AVT5	154.939	150.202	169.602	146.694	125.729	132.182	168.397	195.264	205.109	135.303
YBL090W	MRP21	164.134	168.31	126.339	148.689	125.331	158.502	152.816	140.233	175.793	119.204
YBL091C	MAP2	121.966	132.883	148.24	156.046	164.111	131.27	145.293	150.104	138.837	101.763
YBL091C-A	SCS22	450.868	446.648	420.792	470.428	327.811	257.027	242.182	380.033	312.591	260.654
YBL092W	RPL32	1052.51	1024.9	727.139	803.727	833.806	703.707	489.247	678.626	604.525	416.576
YBL093C	ROX3	168.244	184.839	184.852	186.063	151.936	109.48	154.197	212.345	207.609	170.688
YBL095W	YBL095W	227.496	213.649	216.495	243.395	155.592	173.955	262.954	204.028	283.49	175.336
YBL097W	BRN1	116.55	86.5365	100.274	87.1742	167.092	89.1676	137.361	116.096	109.169	135.067
YBL098W	BNA4	79.1223	110.814	110.491	99.7117	117.266	102.796	116.756	136.014	125.464	84.5778
YBL099W	ATP1	349.416	316.475	376.256	428.105	247.427	373.717	347.222	330.581	301.89	357.328
YBL100W-A	YBL100W-A	75.712	82.6768	69.4586	77.6266	72.6696	103.824	78.5207	85.0475	89.5489	113.467
YBL100W-B	YBL100W-B	81.0754	90.6532	78.3504	78.1562	87.3444	90.8096	91.9306	88.4396	91.3043	94.4592
YBL101C	ECM21	120.868	332.66	249.947	207.673	171.21	189.858	178.584	209.771	162.06	169.418
YBL102W	SFT2	162.948	379.497	290.25	302.452	228.735	304.974	319.065	368.343	321.317	269.695
YBL103C	RTG3	114.706	258.864	211.141	247.914	282.23	292.356	244.346	336.263	298.442	191.302
YBL104C	YBL104C	98.3873	99.9018	116.211	104.836	136.791	132.896	145.655	131.017	135.045	107.361
YBL105C	PKC1	143.866	130.882	142.305	153.194	138.387	139.094	162.296	154.414	165.09	147.612
YBL106C	SRO77	95.4155	94.6553	103.541	87.8853	100.333	71.4558	131.396	118.636	126.728	87.4333
YBL107C	YBL107C	151.034	108.94	153.895	103.879	158.962	123.436	165.762	103.904	132.306	125.931
YBL111C	YBL111C	73.8689	47.3705	111.156	80.0698	89.49	100.154	107.55	80.3231	93.4933	100.814
YBL112C	YBL112C	87.531	58.562	138.834	108.04	129.073	99.1108	185.488	110.482	145.061	133.813
YBL113C	YBL113C	87.8591	59.7736	162.057	127.965	116.764	111.377	139.713	102.054	111.16	118.412
YBR001C	NTH2	152.112	197.46	171.374	195.036	142.19	145.174	176.357	200.723	182.309	153.595
YBR002C	RER2	267.822	189.27	138.034	211.801	162.48	179.667	209.566	201.627	265.435	174.663
YBR003W	COQ1	158.926	191.561	160.69	202.42	141.893	160.663	179.484	189.599	162.474	194.232
YBR004C	GPI18	115.76	167.969	172.403	132.207	116.331	163.519	151.497	133.023	133.29	142.675
YBR005W	RCR1	103.97	191.086	352.652	229.653	145.398	138.295	197.451	161.57	163.368	235.853
YBR006W	UGA2	147.292	180.448	191.24	153.822	112.705	150.393	144.602	162.392	148.384	138.936
YBR007C	DSF2	112.191	100.844	100.81	104.449	122.831	139.789	126.189	133.393	142.385	148.734
YBR008C	FLR1	140.479	90.3357	97.0433	114.325	100.577	135.977	120.431	131.364	140.937	93.6358
YBR009C	HHF1	1195.58	1669.63	1510.6	1186.98	1261.69	572.397	1083.19	966.542	954.593	553.443
YBR010W	HHT1	1324.13	1774.4	1577.57	1286.38	1218.99	920.247	1213.79	1156.86	1036.68	908.999
YBR011C	IPP1	366.838	368.086	334.04	363.625	327.029	346.39	359.61	387.856	362.934	366.339
YBR012W-A	YBR012W-A	216.87	258.815	270.96	192.578	208.584	203.882	186.965	213.576	187.639	170.843
YBR012W-B	YBR012W-B	174.665	216.684	243.79	145.048	173.456	168.051	165.493	178.783	161.783	138.973
YBR013C	YBR013C	131.891	237.059	220.485	119.672	195.665	200.831	192.1	185.213	165.535	127.43
YBR014C	YBR014C	139.162	136.425	100.782	101.715	112.491	109.812	103.091	146.967	107.941	74.1338
YBR015C	MNN2	177.042	124.902	120.397	157.605	180.518	168.924	173.171	129.729	185.573	172.059
YBR016W	YBR016W	212.492	281.872	347.396	346.915	154.636	173.916	202.412	205.671	239.718	197.14
YBR017C	KAP104	160.737	146.5	139.374	147.696	157.57	154.791	172.299	155.76	139.755	147.775
YBR018C	GAL7	44.1113	70.3364	91.6447	78.8985	84.9009	50.3074	69.7431	83.1989	101.815	182.216
YBR019C	GAL10	83.6857	94.3072	106.36	109.757	106.919	103.508	116.97	122.356	107.399	96.5685
YBR020W	GAL1	121.971	98.8312	97.5102	134.158	130.041	89.328	116.811	129.299	116.666	95.6622
YBR021W	FUR4	129.072	91.6783	82.0408	115.159	101.273	130.797	131.105	101.227	101.7	100.705
YBR022W	POA1	162.512	178.929	223.865	165.735	170.223	138.811	161.185	192.673	175.752	161.945
YBR023C	CHS3	160.428	151.591	135.906	152.932	154.794	147.386	156.533	175.993	193.939	178.168
YBR024W	SCO2	143.013	126.938	109.553	123.402	137.659	122.644	174.383	139.577	134.448	122.135
YBR025C	YBR025C	391.93	229.832	256.991	260.011	242.067	294.099	214.68	212.667	226.738	211.008
YBR026C	ETR1	111.441	144.922	112.757	150.374	119.381	102.731	147.844	146.178	142.382	81.6469
YBR028C	YBR028C	131.937	166.365	106.806	142.312	140.226	213.351	110.049	181.658	143.502	101.816
YBR029C	CDS1	306.79	227.343	122.852	182.595	193.192	219.321	182.225	194.905	212.702	203.234
YBR030W	YBR030W	169.859	86.9815	97.6523	98.9089	129.749	103.386	96.8918	104.273	98.9844	99.8502
YBR031W	RPL4A	835.505	430.571	325.17	411.02	336.384	359.356	287.193	334.572	303.037	323.798
YBR033W	EDS1	94.6996	85.9101	131.659	118.179	140.122	107.027	142.113	123.003	135.669	128.201
YBR034C	HMT1	226.775	151.805	150.803	179.704	192.832	195.868	190.413	210.852	186.773	189.082
YBR035C	PDX3	242.256	470.698	336.779	483.536	324.321	440.481	326.348	495.906	334.118	218.267
YBR036C	CSG2	210.536	237.776	278.403	307.254	294.407	294.684	228.174	260.416	262.083	233.678
YBR037C	SCO1	135.251	163.019	140.739	232.988	143.382	120.281	158.426	166.08	212.393	161.726
YBR038W	CHS2	155.789	98.9498	124.794	107.164	96.674	103.635	136.759	123.303	110.443	140.739
YBR039W	ATP3	214.046	181.343	147.573	203.354	204.581	180.969	212.253	152.817	172.365	190.769
YBR040W	FIG1	46.0148	48.9388	74.2353	48.5867	54.0626	24.6877	54.347	58.966	64.3963	51.392
YBR041W	FAT1	134.081	151.051	139.637	132.874	114.301	119.67	136.161	128.38	145.661	121.064
YBR042C	YBR042C	129.106	119.771	112.867	115.937	121.476	118.997	148.029	103.371	119.328	106.723
YBR043C	QDR3	141.543	188.792	174.164	178.59	183.362	222.395	222.222	188.184	207.493	172.281
YBR044C	TCM62	144.786	366.588	286.55	194.983	338.358	330.598	265.849	301.418	213.264	212.345
YBR045C	GIP1	50.4554	100.925	73.5349	87.266	88.7601	56.4365	96.597	139.53	91.1474	112.793
YBR046C	ZTA1	83.2611	235.144	142.969	181.414	106.017	137.455	138.29	236.366	144.558	119.561
YBR047W	FMP23	70.0967	312.158	140.326	147.16	215.836	204.904	124.541	257.028	165.239	100.651
YBR048W	RPS11B	622.22	531.95	378.144	409.183	331.309	286.242	280.742	404.454	301.019	353.243
YBR049C	REB1	178.546	117.698	142.342	145.613	174.506	171.575	157.066	146.098	165.381	169.751
YBR050C	REG2	105.227	105.07	127.744	137.867	127.57	147.142	138.581	146.613	152.581	157.673
YBR052C	RFS1	180.937	232.192	201.871	242.368	145.707	177.83	179.743	185.095	193.392	129.508
YBR053C	YBR053C	127.22	186.226	162.337	183.561	125.144	152.061	173.536	162.141	193.845	184.634
YBR054W	YRO2	315.138	240.868	339.919	134.049	228.705	157.936	313.085	81.1126	98.1507	115.652
YBR055C	PRP6	121.686	117.678	118.281	94.8049	123.451	117.123	130.402	111.92	121.182	105.021
YBR056W	YBR056W	115.445	207.097	235.16	178.562	182.164	103.659	170.125	190.663	172.874	128.012
YBR057C	MUM2	158.598	165.373	156.14	149.416	142.575	144.542	158.571	184.264	161.828	98.4306
YBR058C	UBP14	108.557	107.11	98.1124	111.413	165.616	134.382	125.655	121.463	128.347	146.27
YBR058C-A	TSC3	180.522	223.666	180.71	197.038	204.112	254.3	249.329	230.045	215.223	235.278
YBR059C	AKL1	147.452	189.17	176.723	226.568	211.002	189.966	207.468	201.74	209.554	185.762
YBR060C	ORC2	140.139	121.047	97.0156	120.139	130.704	112.069	111.288	121.328	120.853	129.208
YBR061C	TRM7	130.535	90.1537	85.1183	109.389	110.08	113.14	131.385	101.421	127.768	124.208
YBR062C	YBR062C	195.085	149.018	159.86	169.225	153.788	156.041	160.76	140.282	211.353	208.869
YBR063C	YBR063C	105.726	127.604	99.5612	98.3225	144.788	110.474	131.024	129.346	133.688	174.482
YBR065C	ECM2	99.3103	127.705	119.508	121.319	134.39	109.902	161.799	120.068	186.604	103.827
YBR066C	NRG2	244.31	288.565	233.998	341.077	184.508	306.901	212.315	221.775	224.037	232.985
YBR067C	TIP1	394.178	642.704	835.212	431.377	196.98	306.756	384.23	226.815	240.258	192.688
YBR068C	BAP2	805.267	1090.03	980.435	2144.55	1900.35	1389.58	1680.94	964.306	1581.69	1380.43
YBR069C	TAT1	359.381	145.492	231.741	474.487	287.779	397.652	177.873	183.839	205.395	203.817
YBR070C	ALG14	189.137	83.475	114.839	152.92	97.4725	142.497	112.511	100.201	102.183	123.157
YBR071W	YBR071W	307.707	228.46	516.108	328.266	143.271	313.286	209.065	228.038	130.516	149.909
YBR072W	HSP26	100.018	163.773	420.519	194.078	203.81	199.476	313.182	95.6134	140.157	216.471
YBR073W	RDH54	141.573	88.992	101.516	96.8368	118.365	129.744	97.6752	108.136	106.689	112.633
YBR074W	YBR074W	116.76	168.614	121.336	115.338	163.928	131.901	136.723	162.567	144.069	133.807
YBR076W	ECM8	117.081	144.055	141.557	147.197	128.45	120.57	184.143	148.988	145.003	134.968
YBR077C	SLM4	357.452	321.915	313.691	345.21	307.693	379.57	334.716	308.074	303.37	425.66
YBR078W	ECM33	990.28	501.748	545.639	483.733	541.348	390.101	405.002	397.579	364.683	307.801
YBR079C	RPG1	311.669	206.546	207.932	223.169	199.378	201.956	202.333	180.055	218.926	214.562
YBR080C	SEC18	135.706	141.343	135.983	155.941	153.885	147.797	164.902	153.722	187.617	167.586
YBR081C	SPT7	104.504	108.063	101.447	105.718	129.953	121.62	130.62	115.896	142.075	127.473
YBR082C	UBC4	426.928	281.161	413.786	336.881	185.558	399.138	331.911	289.891	256.956	288.672
YBR083W	TEC1	418.127	413.468	221.873	195.042	188.934	168.781	131.648	183.77	125.168	152.289
YBR084C-A	RPL19A	817.816	643.057	448.996	565.176	432.28	454.991	378.282	519.76	408.374	371.668
YBR084W	MIS1	148.758	81.6216	84.1285	102.206	135.651	84.5398	115.645	94.8778	135.696	144.911
YBR085C-A	YBR085C-A	403.853	758.791	866.746	977.831	180.949	693.915	574.916	458.61	251.119	178.514
YBR085W	AAC3	51.3391	94.7705	100.671	77.853	90.8519	81.8658	103.1	81.0413	88.058	145.63
YBR086C	IST2	271.071	243.409	254.923	250.546	162.583	184.937	229.852	179.39	172.012	193.418
YBR087W	RFC5	186.696	110.483	114.206	94.7552	97.8175	122.103	124.891	124.027	87.907	159.198
YBR088C	POL30	286.056	133.727	137.213	114.054	165.162	116.909	151.579	143.887	164.441	195.427
YBR089C-A	NHP6B	333.956	215.493	213.132	269.072	223.031	222.747	289.56	246.984	209.365	252.077
YBR090C	YBR090C	264.337	164.771	157.162	245.822	155.785	168.851	210.369	201.515	191.412	190.133
YBR091C	MRS5	248.383	181.775	152.288	243.95	145.103	133.7	178.303	179.341	129.436	166.824
YBR092C	PHO3	339.811	108.432	118.289	151.705	120.62	118.485	146.264	104.337	172.851	175.716
YBR093C	PHO5	229.669	183.323	161.828	124.36	139.195	95.0843	150.241	125.435	136.455	143.181
YBR094W	YBR094W	107.942	76.9049	75.6405	74.1415	108.764	78.8168	141.392	81.4485	105.254	102.451
YBR095C	RXT2	135.554	110.585	112.691	106.66	124.81	132.024	151.85	106.699	116.673	143.718
YBR096W	YBR096W	179.899	192.221	154.88	155.418	128.768	119.677	211.485	166.781	197.066	166.048
YBR097W	VPS15	98.128	95.1026	85.746	85.4192	114.037	71.7518	119.81	103.079	96.9139	113.8
YBR098W	MMS4	116.547	92.4669	112.233	97.5759	106.177	103.73	124.231	107.651	102.023	131.347
YBR101C	FES1	304.253	171.65	300.034	202.558	175.271	366.91	290.086	171.449	239.68	311.541
YBR102C	EXO84	104.409	99.7895	101.539	99.4719	117.354	131.438	164.053	138.461	122	111.908
YBR103W	SIF2	114.473	111.851	123.256	138.942	157.513	143.398	164.546	141.831	122.272	140.611
YBR104W	YMC2	121.411	296.615	333.192	371.305	355.854	407.262	292.206	404.907	410.179	287.699
YBR105C	VID24	128.35	301.376	261.044	322.617	344.927	318.521	262.888	401.131	254.288	243.324
YBR106W	PHO88	436.391	219.015	323.774	296.741	250.918	342.492	284.304	284.18	206.758	227.629
YBR107C	IML3	142.198	121.9	116.309	164.821	157.457	231.337	120.348	162.871	127.877	82.5765
YBR108W	YBR108W	80.2073	95.3343	113.027	138.297	97.9155	95.6635	123.915	115.275	118.517	103.734
YBR109C	CMD1	251.155	247.669	225.235	309.585	237.854	248.771	259.121	211.888	294.121	246.101
YBR110W	ALG1	110.649	138.539	152.366	120.698	182.619	121.559	155.094	139.745	157.247	136.924
YBR111C	YSA1	150.935	190.193	166.717	217.214	135.687	183.039	171.499	187.746	167.013	118.964
YBR111W-A	SUS1	202.834	220.943	153.936	181.167	199.336	179.509	184.189	219.937	210.486	174.278
YBR112C	CYC8	217.163	182.263	242.414	292.152	195.945	243.44	239.742	247.365	215.451	256.2
YBR114W	RAD16	99.7573	158.789	146.165	175.518	185.9	126.117	131.412	185.679	147.436	104.452
YBR115C	LYS2	128.567	613.473	412.728	518.056	527.417	554.081	410.106	718.552	483.652	389.814
YBR117C	TKL2	111.087	125.82	114.438	136.166	118.977	97.3746	125.758	136.479	158.536	155.063
YBR118W	TEF2	1661.67	1172.22	1164.88	1246.44	1211.03	1033.76	1178.89	1100.16	1142.67	1278.37
YBR119W	MUD1	242.306	247.763	199.419	159.527	214.454	185.391	210.227	220.228	178.341	152.455
YBR120C	CBP6	211.28	200.856	148.431	164.699	127.672	168.257	147.447	194.517	128.256	288.137
YBR121C	GRS1	250.728	183.32	165.034	170.878	203.024	183.145	185.814	183.223	201.21	174.915
YBR122C	MRPL36	248.466	235.033	253.897	207.042	197.397	180.533	225.906	239.652	224.529	255.819
YBR123C	TFC1	111.289	86.462	95.6109	90.6374	99.4793	100.703	142.981	101.527	122.094	118.507
YBR125C	PTC4	123.077	97.1603	102.717	123.168	92.7731	93.6212	140.339	110.635	104.275	118.455
YBR126C	TPS1	363.599	573.474	509.137	839.305	369.75	246.907	416.426	512.515	374.676	314.286
YBR127C	VMA2	285.723	299.93	264.457	332.625	252.532	318.059	239.177	309.982	307.334	231.531
YBR128C	ATG14	177.014	206.088	173.636	206.011	178.481	169.218	201.659	183.086	186.514	141.704
YBR129C	OPY1	129.606	131.233	130.823	138.456	143.839	143.863	134.686	137.575	159.544	161.66
YBR130C	SHE3	192.599	160.546	159.882	131.205	131.277	159.489	151.948	166.622	152.855	165.935
YBR131W	CCZ1	87.2457	114.919	108.258	117.982	112.355	129.509	102.766	134.523	134.676	91.9665
YBR132C	AGP2	159.419	252.911	262.457	312.468	230.987	145.441	220.023	292.799	216.056	205.67
YBR133C	HSL7	209.136	164.138	172.942	155.894	143.215	165.026	150.293	170.002	149.16	136.347
YBR135W	CKS1	164.931	122.412	136.904	167.616	90.2069	142.513	149.867	166.039	160.308	133.193
YBR136W	MEC1	71.0617	72.6285	74.8587	75.2321	107.868	85.4192	112.727	88.2883	102.654	123.57
YBR137W	YBR137W	148.498	180.138	181.459	148.356	140.852	150.764	197.732	136.546	190.303	100.67
YBR138C	YBR138C	102.184	101.152	109.732	80.8645	156.785	94.1565	125.292	117.153	122.783	89.9512
YBR139W	YBR139W	177.315	236.217	216.605	225.938	156.88	181.982	208.498	243.768	175.199	138.405
YBR140C	IRA1	129.008	137.632	127.622	138.456	185.81	121.46	157.96	149.188	158.721	154.449
YBR141C	YBR141C	141.981	95.9557	101.372	107.406	110.035	123.641	110.259	95.1103	105.157	96.6623
YBR142W	MAK5	109.984	70.9989	67.9902	72.8896	180.631	79.1944	104.129	77.4586	129.137	81.6213
YBR143C	SUP45	323.625	248.465	168.122	216.11	219.706	206.399	185.261	234.531	244.09	189.949
YBR145W	ADH5	97.1701	1078.99	1071.46	1129.37	664.077	1193.8	535.311	1303.99	634.553	381.919
YBR146W	MRPS9	184.182	316.782	214.64	338.329	204.653	302.807	195.823	282.567	236.498	183.963
YBR147W	YBR147W	55.9627	744.152	250.133	361.301	359.214	418.053	326.58	486.661	249.564	190.723
YBR148W	YSW1	61.6311	204.768	89.8186	114.421	166.752	97.6964	123.291	156.931	100.658	86.5382
YBR149W	ARA1	216.253	343.379	296.179	365.199	212.587	168.369	253.444	311.7	235.556	190.924
YBR150C	TBS1	120.116	151.825	138.739	142.894	151.722	127.289	156.193	180.662	152.294	178.798
YBR151W	APD1	160.156	199.092	130.983	174.369	118.98	149.157	189.596	197.127	143.318	204.363
YBR152W	SPP381	110.242	125.139	117.031	119.353	89.7162	96.6264	139.801	155.48	88.3362	71.8692
YBR153W	RIB7	195.663	243.428	163.922	196.915	169.246	197.765	145.458	187.359	231.469	134.869
YBR154C	RPB5	308.07	304.602	152.061	191.938	228.682	207.947	264.5	218.889	192.447	186.808
YBR155W	CNS1	109.714	78.985	101.723	88.9006	87.0386	91.8313	111.886	101.265	103.276	87.6638
YBR156C	SLI15	97.6086	88.927	83.2783	69.7819	87.5813	83.3363	97.657	90.0175	91.0306	90.2146
YBR157C	ICS2	220.178	213.872	253.749	225.954	237.719	187.62	168.91	169.215	154.572	117.94
YBR158W	AMN1	612.012	723.703	503.436	292.867	458.419	174.496	420.806	523.206	290.956	229.563
YBR159W	IFA38	182.872	168.888	148.001	146.985	159.212	123.287	163.645	159.853	170.009	184.414
YBR160W	CDC28	194.968	152.572	131.493	172.521	128.444	122.067	143.933	159.865	125.98	100.537
YBR161W	CSH1	195.122	203.759	181.242	239.049	150.586	163.963	140.498	169.067	162.828	130.46
YBR162C	TOS1	423.689	514.638	587.381	654.539	371.53	537.392	394.402	477.39	412.953	381.924
YBR162W-A	YSY6	407.771	520.557	452.729	447.523	437.176	449.079	465.511	418.542	482.573	302.934
YBR163W	DEM1	141.028	146.27	137.589	162.092	160.688	149.16	173.39	167.588	175.175	155.595
YBR164C	ARL1	152.383	178.968	128.905	154.827	145.341	165.726	156.749	257.76	120.533	146.355
YBR165W	UBS1	143.673	285.419	230.815	215.618	224.333	279.728	270.874	223.967	220.218	170.474
YBR166C	TYR1	140.068	260.627	208.784	188.027	231.988	323.758	196.553	258.047	230.771	163.099
YBR167C	POP7	175.322	331.55	199.27	245.763	175.961	257.62	225.403	279.645	205.989	208.102
YBR168W	PEX32	88.0075	129.831	104.318	112.416	143.695	70.8246	121.016	107.718	110.923	130.721
YBR169C	SSE2	125.028	245.005	215.847	210.985	198.537	148.204	225.749	208.146	140.574	171.869
YBR170C	NPL4	149.136	145.27	128.758	164.726	123.067	190.262	152.174	155.599	160.054	133.727
YBR171W	SEC66	190.731	165.948	128.432	136.379	174.466	152.656	149.182	157.916	150.32	126.411
YBR172C	SMY2	245.633	170.632	158.767	180.522	230.747	170.602	152.38	159.079	168.679	207.986
YBR173C	UMP1	267.273	211.566	184.854	242.102	126.062	216.228	168.343	239.716	241.583	188.951
YBR175W	SWD3	129.326	142.253	157.1	148.914	132.968	131.384	187.084	149.126	158.634	95.5425
YBR176W	ECM31	152.81	169.008	142.902	191.177	138.001	189.92	149.49	216.828	172.683	123.785
YBR177C	EHT1	247.382	244.466	215.371	260.505	204.79	242.247	196.626	231.492	211.396	210.292
YBR179C	FZO1	105.537	113.706	102.466	115.803	117.619	97.7006	144.563	120.41	116.269	147.51
YBR180W	DTR1	64.1443	75.1721	90.0453	62.3789	82.3538	70.607	95.0921	82.5103	76.2396	113.554
YBR181C	RPS6B	824.088	625.79	474.435	582.429	397.769	399.38	394.149	565.151	401.572	425.905
YBR182C	SMP1	80.9483	93.2609	89.7101	84.7473	84.2954	80.5872	82.7124	83.1196	98.5504	109.23
YBR182C-A	YBR182C-A	125.293	112.18	55.118	111.712	123.622	82.6257	95.8593	79.3577	129.676	140.076
YBR183W	YPC1	144.567	218.23	159.274	200.981	144.976	99.0756	136.864	194.952	158.336	172.411
YBR184W	YBR184W	57.7896	60.5668	59.258	53.2282	74.9155	63.9705	72.5964	59.7829	85.5144	102.889
YBR185C	MBA1	113.094	118.017	121.239	110.07	112.04	92.7478	130.105	110.362	110.478	96.3042
YBR186W	PCH2	91.3491	87.1182	79.5945	69.5384	109.113	115.617	100.882	109.961	82.9814	86.3096
YBR187W	GDT1	282.046	187.119	166.439	190.291	174.73	162.235	228.329	181.94	190.612	163.729
YBR188C	NTC20	187.117	146.364	172.055	136.349	137.049	186.086	182.459	150.8	162.034	101.019
YBR189W	RPS9B	1001.64	893.834	522.61	585.393	667.943	415.487	376.805	592.264	436.614	369.417
YBR191W	RPL21A	871.729	749.124	451.928	546.069	629.338	375.861	352.404	530.625	435.119	313.142
YBR192W	RIM2	168.804	181.914	159.456	141.76	139.25	123.08	150.107	161.05	168.43	140.801
YBR193C	MED8	171.797	152.613	147.27	144.017	136.037	115.537	131.953	156.881	135.07	107.923
YBR194W	SOY1	171.509	169.76	155.769	162.9	142.119	135.999	249.335	158.613	171.613	113.464
YBR195C	MSI1	172.683	145.071	198.418	163.429	153.541	154.932	197.023	157.971	117.075	91.8747
YBR196C	PGI1	643.492	558.06	505.554	439.69	588.164	427.892	529.236	536.721	616.923	705.083
YBR197C	YBR197C	309.084	261.566	333.286	279.868	137.05	226.156	138.099	253.293	208.653	130.876
YBR198C	TAF5	198.428	185.527	161.491	173.188	164.503	140.632	164.796	167.056	176.334	150.381
YBR199W	KTR4	193.493	224.171	201.43	231.239	229.98	217.021	232.267	246.19	229.093	228.026
YBR200W	BEM1	87.0484	97.1865	104.395	93.7919	117.671	116.058	130.449	138.605	120.83	116.395
YBR201C-A	YBR201C-A	94.0143	105.342	168.192	154.091	115.691	149.992	154.35	136.204	150.867	526.948
YBR201W	DER1	105.861	102.368	110.368	138.841	96.2481	144.362	140.411	129.457	140.313	205.643
YBR202W	CDC47	144.568	107.025	140.218	159.551	131.781	197.223	136.559	140.233	168.358	154.271
YBR203W	COS111	75.6513	84.2375	161.296	125.917	119.614	127.353	100.133	121.017	103.188	149.513
YBR204C	YBR204C	91.6791	100.523	111.024	120.209	91.64	92.1083	120.821	130.012	149.428	138.655
YBR205W	KTR3	135.835	101.87	103.944	121.001	115.463	123.201	142.185	120.534	119.644	124.141
YBR207W	FTH1	153.949	125.188	192.795	160.246	156.43	220.7	160.3	148.333	163.437	166.693
YBR208C	DUR1,2	80.2493	81.1421	106.135	91.2983	109.957	88.6488	119.728	103.883	107.177	105.971
YBR210W	ERV15	140.772	192.042	144.429	133.132	169.662	176.32	263.41	197.356	150.503	154.519
YBR211C	AME1	122.256	154.628	154.274	138.774	170.247	112.571	156.584	144.024	142.64	154.569
YBR212W	NGR1	120.927	160.242	148.65	197.135	165.032	188.138	165.062	171.754	185.946	177.847
YBR213W	MET8	96.1715	143.506	131.252	174.446	138.41	149.13	164.07	119.686	124.547	110.072
YBR214W	SDS24	149.381	283.607	269.709	299.457	238.221	162.112	238.088	302.969	220.982	177.548
YBR215W	HPC2	111.016	107.613	105.39	96.8269	100.907	115.226	178.161	101.536	118.074	104.181
YBR216C	YBP1	119.578	129.445	129.725	111.252	130.713	114.478	149.508	131.463	151.806	122.189
YBR217W	ATG12	108.954	159.639	164.86	114.867	165.645	96.8829	167.077	128.013	139.02	124.788
YBR218C	PYC2	155.861	532.171	419.025	609.659	638.78	397.804	425.594	561.178	491.114	323.215
YBR219C	YBR219C	186.172	162.754	136.548	189.617	162.062	142.867	182.28	176.897	184.001	157.271
YBR220C	YBR220C	108.163	92.9884	106.565	119.438	101.148	93.8212	113.498	101.823	127.158	84.7153
YBR221C	PDB1	188.238	230.563	296.223	296.666	204.065	212.755	237.368	260.181	240.399	202.134
YBR222C	PCS60	125.48	176.363	235.74	205.491	158.183	133.308	197.054	196.174	199.067	219.912
YBR223C	TDP1	86.2371	101.792	111.879	105.527	91.3209	105.664	117.038	110.934	155.678	112.371
YBR225W	YBR225W	102.428	124.536	114.12	133.781	117.371	109.033	134.752	139.105	136.392	118.074
YBR227C	MCX1	98.4216	125.727	140.031	117.287	171.283	145.625	127.573	156.365	154.795	111.24
YBR228W	SLX1	130.213	166.175	178.611	155.367	179.749	173.202	171.489	167.979	149.774	113.148
YBR229C	ROT2	111.736	179.292	158.856	152.895	172.795	207.527	185.292	181.884	161.528	157.228
YBR230C	OM14	244.24	366.334	215.275	341.478	175.735	171.691	283.485	327.602	222.081	178.422
YBR230W-A	YBR230W-A	1351.57	668.493	610.768	729.558	532.765	477.822	545.71	459.185	492.332	731.964
YBR231C	SWC5	122.274	70.4435	92.9936	109.119	84.9637	89.25	95.0994	73.7684	103.201	123.347
YBR233W	PBP2	105.349	75.5756	104.053	95.625	87.1091	94.5679	111.433	97.6663	106.327	103.589
YBR233W-A	DAD3	154.575	146.566	162.415	134.883	167.884	171.482	158.787	131.939	131.141	159.189
YBR234C	ARC40	159.621	171.627	180.99	200.972	148.185	162.768	199.156	191.818	217.553	201.181
YBR235W	YBR235W	111.534	110.144	119.572	121.456	129.547	120.74	137.059	119.635	119.756	121.523
YBR236C	ABD1	126.417	134.277	130.104	138.814	125.017	147.36	165.53	147.068	196.698	137.425
YBR237W	PRP5	101.281	114.71	101.44	110.151	114.823	132.262	145.78	121.142	114.444	135.776
YBR238C	YBR238C	95.1904	66.9472	56.6399	65.5949	84.4236	86.903	103.072	75.5852	99.3395	95.039
YBR239C	YBR239C	140.564	126.023	118.69	122.588	125.279	149.287	134.848	144.162	218.024	110.659
YBR240C	THI2	58.6994	77.4651	97.1577	95.2433	94.7993	90.9772	100.507	99.7319	87.5833	100.612
YBR241C	YBR241C	60.0586	91.2471	129.251	148.901	87.4685	131.185	112.781	108.986	137.423	115.117
YBR242W	YBR242W	163.26	101.1	116.208	113.037	139.949	138.807	131.484	111.123	165.924	264.894
YBR243C	ALG7	126.245	79.5112	88.8077	88.7163	106.562	104.434	155.417	77.7562	122.257	97.0646
YBR244W	GPX2	207.165	224.523	215.386	85.3968	202.423	116.563	191.175	131.381	156.291	122.406
YBR245C	ISW1	124.343	88.0468	97.1262	79.6772	130.581	102.331	102.302	85.2675	118.966	120.431
YBR246W	YBR246W	122.01	96.2166	87.2475	124.092	82.7806	88.6231	124.16	104.96	128.917	161.063
YBR247C	ENP1	138.076	65.1511	82.2979	84.0063	120.555	83.9517	98.9553	63.4391	104.444	94.592
YBR248C	HIS7	176.104	534.673	343.302	401.142	335.961	467.941	272.18	594.354	381.401	314.817
YBR249C	ARO4	254.013	747.792	506.053	698.826	581.473	720.216	517.898	829.495	645.181	423.037
YBR250W	YBR250W	46.4549	75.4496	69.9945	62.3248	103.147	85.7889	114.541	91.0694	140.612	133.225
YBR251W	MRPS5	143.413	140.507	102.666	138.43	110.504	123.822	134.378	111.661	142.618	128.372
YBR252W	DUT1	185.634	159.778	186.925	190.871	122.479	180.646	129.678	116.615	229.832	210.95
YBR253W	SRB6	248.475	316.878	228.134	218.59	209.817	188.08	220.746	251.651	200.453	168.671
YBR254C	TRS20	170.867	230.257	127.223	146.35	120.843	180.561	174.854	179.501	164.132	124.132
YBR255C-A	YBR255C-A	253.857	324.643	282.041	259.765	393.077	288.387	276.098	345.797	270.823	238.161
YBR255W	YBR255W	87.8762	158.571	107.477	109.525	157.599	135.459	150.127	136.838	137.106	87.0158
YBR256C	RIB5	200.749	1145.4	628.128	813.91	660.868	879.394	610.565	1251.62	818.216	687.022
YBR257W	POP4	144.23	141.975	128.572	121.904	160.125	135.636	164.968	137.572	175.411	166.498
YBR258C	SHG1	156.378	167.507	115.832	130.074	140.364	148.623	165.066	153.544	103.825	113.77
YBR259W	YBR259W	90.6206	82.5159	72.5078	79.3922	105.64	74.882	108.917	86.5737	115.167	89.6865
YBR260C	RGD1	120.522	103.603	108.31	117.615	112.874	108.018	107.225	113.473	116.849	171.34
YBR261C	YBR261C	136.782	117.292	144.142	186.028	121.069	166.717	179.21	131.564	119.684	148.723
YBR262C	FMP51	196.56	237.349	261.578	321.075	249.127	313.08	220.464	214.956	285.515	197.942
YBR263W	SHM1	150.456	133.81	131.047	162.909	159.366	200.716	132.927	154.752	154.65	115.667
YBR264C	YPT10	141.107	143.497	157.554	138.802	104.25	122.374	136.828	123.341	102.798	122.239
YBR265W	TSC10	151.842	91.4354	108.276	122.529	93.8605	123.628	120.566	105.444	107.608	72.323
YBR267W	REI1	145.938	68.952	96.6844	109.241	86.4369	97.0558	116.141	99.0224	126.031	92.7872
YBR268W	MRPL37	184.276	130.157	159.271	197.803	120.453	142.542	170.792	137.637	197.529	268.746
YBR269C	FMP21	154.301	162.607	149.82	179.789	113.55	191.691	253.545	187.125	128.845	182.152
YBR270C	BIT2	100.673	84.5892	84.2544	116.9	126.128	94.016	94.5525	82.1999	112.247	115.513
YBR271W	YBR271W	95.9814	58.2148	50.8787	76.2167	95.2687	83.2389	112.497	82.914	96.765	121.75
YBR272C	HSM3	94.6145	107.601	87.0672	82.2915	100.587	88.1439	87.4011	117.393	134.834	122.759
YBR273C	UBX7	99.5123	102.861	112.354	120.676	92.4404	103.952	137.653	135.977	108.718	100.628
YBR274W	CHK1	84.0856	77.8046	87.2798	84.1105	123.913	101.821	95.9283	81.3096	91.266	134.036
YBR275C	RIF1	84.9739	55.9874	73.2068	67.1406	98.8437	94.055	100.478	85.005	99.7952	100.64
YBR276C	PPS1	102.922	83.3932	95.7841	99.6858	84.7174	129.216	116.59	126.504	97.6328	113.309
YBR278W	DPB3	137.673	93.0305	151.027	107.574	250.395	124.043	149.543	122.202	141.517	82.5257
YBR279W	PAF1	174.247	181.722	147.603	181.432	254.546	188.296	200.785	194.878	228.363	212.227
YBR280C	SAF1	88.3867	133.406	136.582	133.697	124.996	100.156	129.237	141.659	124.893	99.7969
YBR281C	YBR281C	84.0822	72.8655	69.7284	65.5154	94.0407	89.3059	100.792	90.5077	83.9578	66.0748
YBR282W	MRPL27	192.403	181.516	163.305	142.633	146.522	127.699	184.123	147.628	153.421	131.545
YBR283C	SSH1	242.376	212.632	230.831	196.176	277.57	147.115	194.315	159.157	189.037	204.049
YBR284W	YBR284W	66.9541	79.4121	85.2253	75.2319	77.2471	56.7042	99.7406	91.1831	85.1749	73.6555
YBR285W	YBR285W	96.2361	162.783	145.214	119.158	94.5116	99.9416	117.16	123.726	93.2476	87.2657
YBR286W	APE3	309.422	466.326	338.903	427.938	238.889	275.809	306.126	375.473	258.286	237.98
YBR287W	ZSP1	224.455	289.779	284.956	293.609	231.445	206.347	186.081	208.246	220.445	197.043
YBR288C	APM3	144.722	137.676	125.683	114.089	143.416	142.853	119.454	152.83	125.674	112.039
YBR289W	SNF5	109.019	76.8948	101.871	93.997	90.2641	79.925	119.319	105.184	116.192	97.794
YBR290W	BSD2	198.424	216.671	240.569	247.966	182.669	183.971	221.03	249.788	229.366	162.605
YBR291C	CTP1	152.777	160.901	154.238	140.942	110.908	136.995	153.668	147.66	175.846	232.18
YBR293W	VBA2	119.298	134.236	114.146	141.683	151.251	174.043	207.978	170.216	176.16	235.068
YBR294W	SUL1	83.0263	88.1528	90.1024	95.4918	100.005	96.3509	133.785	116.046	115.47	98.9973
YBR295W	PCA1	77.3778	70.0691	91.9034	104.801	100.826	89.3729	105.23	85.4074	109.572	113.036
YBR296C	PHO89	39.7672	33.997	63.5462	55.6102	54.4471	40.5274	63.15	51.8	88.0374	37.091
YBR297W	MAL33	42.8206	58.684	79.0933	69.6525	81.0415	93.0957	128.459	104.673	101.223	139.938
YBR298C	MAL31	90.778	78.6199	74.1441	81.6744	82.9091	70.9747	105.178	93.4979	96.2711	70.8694
YBR298C-A	YBR298C-A	68.0492	46.3458	53.2212	43.7268	50.0342	46.4093	73.6727	53.7732	50.4057	54.4609
YBR299W	MAL32	101.676	89.4123	78.5272	87.2068	102.844	106.779	102.372	98.461	108.732	99.0659
YBR301W	DAN3	36.1628	34.1966	42.7069	56.4049	44.3176	22.6858	61.137	65.0972	52.0567	27.9453
YBR302C	COS2	99.9219	104.249	143.538	131.886	118.024	127.139	133.461	121.614	151.38	147.916
YCL001W	RER1	200.115	136.841	154.65	110.997	145.996	137.759	158.197	118.58	134.28	155.328
YCL001W-A	YCL001W-A	128.342	104.196	87.3681	80.0283	89.5673	115.766	143.324	114.262	184.574	95.4648
YCL001W-B	YCL001W-B	141.603	98.9627	117.181	116.225	78.8113	74.4956	141.538	149.321	91.5892	102.721
YCL002C	YCL002C	182.751	122.085	151.2	117.281	147.058	148.865	151.642	132.078	162.715	149.235
YCL004W	PGS1	136.112	112.886	138.328	107.114	112.932	140.202	155.293	112.304	124.756	114.617
YCL005W	LDB16	164.744	138.844	163.844	171.351	152.77	147.565	186.092	147.146	129.774	148.886
YCL005W-A	VMA9	663.589	436.995	486.376	558.162	309.677	624.475	512.804	486.116	326.768	503.981
YCL008C	STP22	135.278	300.565	324.688	473.124	224.651	352.168	262.125	371.353	272.637	239.995
YCL009C	ILV6	222.324	694.643	625.532	919.333	441.355	678.928	462.303	743.995	509.489	448.74
YCL010C	SGF29	282.949	283.401	314.237	404.065	251.509	252.844	273.961	317.15	294.918	202.263
YCL011C	GBP2	317.183	224.996	261.837	276.365	241.251	284.454	232.197	241.65	328.411	359.425
YCL012C	YCL012C	154.837	137.17	137.483	114.965	165.693	131.277	142.314	181.562	145.207	105.195
YCL014W	BUD3	109.542	76.8908	103.153	83.3395	119.899	90.4744	109.863	105.339	115.081	117.43
YCL016C	DCC1	80.6011	76.9772	113.893	113.572	92.033	96.7437	89.546	128.203	113.773	101.133
YCL017C	NFS1	111.382	108.478	158.372	160.588	183.139	169.118	142.508	159.676	168.716	166.074
YCL018W	LEU2	20.2993	12.0775	0.121489	0.397311	0.698324	0	0.189766	0.103474	0	3.97002
YCL019W	YCL019W	90.4759	81.0261	84.1678	83.3395	89.0996	100.528	90.5594	84.9043	81.0561	80.0626
YCL020W	YCL020W	82.4528	70.4541	74.9157	84.437	95.2845	83.9913	80.913	82.7668	76.2152	66.4035
YCL021W-A	YCL021W-A	63.2423	84.9283	89.6912	88.0226	92.377	92.4249	109.034	138.916	113.365	71.8712
YCL024W	KCC4	96.8924	44.5349	59.7789	55.6321	66.0675	72.0703	74.3376	64.647	79.164	81.8405
YCL025C	AGP1	212.896	258.204	477.03	133.951	287.081	226.084	303.828	136.832	178.248	454.994
YCL026C-A	FRM2	52.4092	50.3551	70.0637	71.0372	116.441	180.981	98.2509	72.7427	104.358	108.553
YCL026C-B	YCL026C-B	103.098	264.047	109.129	102.811	280.921	60.109	123.336	97.9375	115.695	77.0468
YCL027W	FUS1	125.403	388.079	125.364	93.786	108.39	76.265	89.5967	137.756	88.2322	91.2715
YCL028W	RNQ1	102.51	125.215	128.692	144.658	103.458	97.9407	120.411	151.218	122.827	77.0435
YCL029C	BIK1	150.893	204.266	215.146	204.007	130.5	226.754	194.008	278.547	164.996	146.766
YCL030C	HIS4	187.018	2245.68	1504.92	682.15	2218.87	885.138	1553.06	2022.25	1002.42	706.245
YCL031C	RRP7	278.048	259.643	243.4	208.613	236.081	210.829	249.617	241.15	234.404	206.459
YCL032W	STE50	104.56	96.6794	109.901	159.614	104.92	134.445	129.564	119.359	138.532	177.469
YCL033C	YCL033C	111.56	124.426	165.593	204.173	120.761	123.631	118.484	135.909	157.089	119.922
YCL034W	LSB5	135.453	137.341	204.069	219.98	106.753	166.777	150.925	136.312	178.057	150.152
YCL035C	GRX1	272.973	321.375	275.957	318.462	164.325	245.69	231.714	369.997	236.074	173.45
YCL036W	GFD2	108.927	71.7612	84.7903	134.96	84.7975	83.6906	75.2804	75.4924	93.6084	113.746
YCL037C	SRO9	361.754	189.498	155.851	224.561	215.4	182.473	188.935	162.761	172.338	171.611
YCL038C	ATG22	99.75	111.452	131.071	116.917	137.935	110.02	149.478	135.225	160.425	118.594
YCL039W	GID7	116.417	169.004	176.789	216.524	156.425	174.358	203.784	194.246	169.118	195.383
YCL040W	GLK1	480.543	719.687	663.518	979.001	463.322	348.503	740.063	538.694	459.671	523.307
YCL042W	YCL042W	276.55	380.301	359.664	519.233	258.299	217.155	351.423	280.244	290.489	248.619
YCL043C	PDI1	431.233	239.328	317.584	390.678	274.199	355.614	301.338	279.575	236.709	336.006
YCL044C	MGR1	155.168	113.607	144.424	171.305	113.528	151.551	165.687	150.078	173.688	136.756
YCL045C	YCL045C	156.165	148.592	144.976	170.354	160.738	150.022	164.351	161.222	205.089	157.95
YCL047C	YCL047C	89.2588	97.81	114.427	124.916	129.548	112.369	143.585	123.6	148.476	123.285
YCL048W	SPS22	45.8173	52.9491	58.7572	82.0683	72.9982	58.559	111.415	81.7207	89.3117	79.4423
YCL048W-A	YCL048W-A	54.0311	74.5291	58.1533	103.001	98.2583	131.328	59.1381	66.4628	115.862	366.528
YCL049C	YCL049C	111.46	142.819	175.289	191.69	132.3	171.015	172.373	223.552	185.981	144.55
YCL050C	APA1	195.1	132.878	169.221	145.689	128.993	196.022	145.119	145.79	150.982	188.631
YCL051W	LRE1	121.216	129.553	140.231	166.351	133.937	109.8	155.429	141.368	158.554	121.066
YCL052C	PBN1	120.098	133.959	111.685	152.482	118.111	95.9445	149.161	143.54	174.043	124.992
YCL054W	SPB1	167.838	77.5136	87.2301	109.658	130.317	104.229	122.32	101.856	124.496	160.336
YCL055W	KAR4	367.932	393.924	182.551	137.245	151.397	160.392	137.402	220.914	123.523	85.7222
YCL056C	YCL056C	272.804	289.198	216.789	188.368	173.88	193.42	252.753	175.681	160.225	154.859
YCL057C-A	YCL057C-A	298.006	180.531	247.907	286.495	123.852	162.859	203.603	148.469	241.225	235.6
YCL057W	PRD1	158.343	123.889	129.113	126.829	112.689	114.424	152.065	133.77	124.822	108.445
YCL058W-A	YCL058W-A	328.837	200.21	193.902	243.992	160.505	231.773	175.963	231.698	268.816	185.623
YCL059C	KRR1	131.93	58.2641	53.9632	73.3027	89.1159	98.8279	98.7507	80.8721	88.468	85.537
YCL061C	MRC1	106.745	67.4746	82.4895	75.2862	94.4087	90.8359	103.747	101.211	89.2607	106.991
YCL063W	VAC17	185.729	134.882	148.917	216.187	235.725	178.956	253.232	171.786	169.235	164.482
YCL064C	CHA1	214.172	925.943	462.953	418.916	661.913	81.6814	620.241	408.141	396.734	317.838
YCL066W	HMLALPHA1	24.8093	26.2248	19.2956	31.5886	50.735	19.5919	45.5703	35.7399	27.2103	41.0895
YCL067C	HMLALPHA2	75.279	73.3326	70.5397	68.4123	69.5885	59.4425	108.759	96.0908	72.0319	79.153
YCL068C	YCL068C	41.0749	49.731	54.752	54.4801	102.522	54.9986	68.0262	65.8544	67.4354	46.9471
YCL069W	VBA3	33.7949	36.099	38.8802	39.1551	61.1361	53.2238	65.8058	45.2216	57.2926	51.5908
YCL073C	YCL073C	27.8527	30.2339	38.0855	36.2632	41.4295	27.8804	67.8393	46.9713	48.4985	51.5529
YCL074W	YCL074W	19.8861	24.9768	47.0637	43.0554	54.1105	29.7228	46.3003	44.4906	41.29	38.8182
YCL075W	YCL075W	22.9837	27.9456	32.2093	32.9705	51.6387	18.4132	79.3452	54.0966	40.0179	16.5209
YCR002C	CDC10	173.824	138.269	157.893	137.312	144.841	204.976	158.938	135.546	179.982	171.518
YCR003W	MRPL32	172.81	211.098	141.521	143.905	238.622	165.262	167.26	207.343	194.054	161.25
YCR004C	YCP4	166.333	210.228	240.934	266.29	152.794	158.821	153.603	204.629	139.451	126.708
YCR005C	CIT2	562.062	1440.17	4211.56	1530.84	1719.34	1025.09	2048.88	2366.78	2607.91	2384.49
YCR007C	YCR007C	170.039	196.664	289.211	194.654	151.531	211.744	174.25	205.525	133.877	166.402
YCR008W	SAT4	200.091	166.475	165.238	182.371	158.472	175.273	183.627	160.849	166.239	149.174
YCR009C	RVS161	221.294	223.193	221.758	181.659	147.898	221.442	163.744	248.417	165.205	165.284
YCR010C	ADY2	61.28	58.0144	71.1959	97.7069	76.8133	77.3028	99.0821	80.5831	79.4211	186.839
YCR011C	ADP1	164.357	138.96	138.157	150.716	161.535	145.214	150.389	150.442	144.761	163.527
YCR012W	PGK1	1996.6	1364.48	1546.15	1496.55	922.625	1434.85	1445.26	1316.57	1271.05	1544.61
YCR014C	POL4	232.087	188.467	132.654	136.329	206.939	194.158	210.235	193.94	208.349	231.916
YCR015C	YCR015C	205.13	156.644	109.719	125.036	124.827	153.514	175.868	130.079	114.848	148.016
YCR016W	YCR016W	122.221	80.3672	96.3004	100.456	107.123	103.145	136.961	102.825	133.386	90.2365
YCR017C	CWH43	132.706	131.713	164.54	150.235	159.171	176.216	188.962	161.506	149.057	203.635
YCR018C	SRD1	194.077	119.146	210.762	92.6276	90.3335	109.722	90.7621	95.2895	104.736	74.4837
YCR019W	MAK32	84.834	89.0414	99.3456	113.981	100.058	96.3898	119.322	101.289	117.789	81.944
YCR020C	PET18	123.084	140.945	126.057	129.258	171.294	188.624	171.723	164.832	162.482	125.767
YCR020C-A	MAK31	152.348	144.546	151.335	173.149	208.003	192.498	200.243	196.036	241.633	300.886
YCR020W-B	HTL1	173.442	115.721	125.652	101.376	111.452	119.436	136.775	132.528	146.956	125.232
YCR021C	HSP30	92.2389	84.1646	181.048	108.857	151.01	96.0299	262.115	106.095	110.575	107.699
YCR023C	YCR023C	142.797	233.201	197.928	233.985	234.137	310.009	193.218	313.516	198.464	177.121
YCR024C	SLM5	149.134	238.453	226.754	236.783	224.705	227.814	221.78	281.744	211.013	157.29
YCR024C-B	YCR024C-B	1355.27	925.173	711.272	368.924	676.292	588.518	1143.72	517.942	502.637	466.763
YCR026C	NPP1	137.755	113.301	121.726	158.554	138.346	140.545	121.319	137.29	134.331	130.984
YCR027C	RHB1	128.622	109.561	93.7555	119.396	137.289	112.869	127.198	108.039	136.893	107.519
YCR028C	FEN2	118.775	102.189	108.968	129.059	171.795	129.47	150.716	125.362	207.7	143.887
YCR028C-A	RIM1	239.785	182.784	202.073	132.654	252.065	196.451	206.243	132.042	200.964	135.248
YCR030C	SYP1	154.091	193.553	185.451	204.763	179.403	158.738	179.046	195.301	175.83	154.857
YCR031C	RPS14A	945.746	832.13	646.349	709.528	601.245	524.217	467.863	628.645	486.647	476.768
YCR032W	BPH1	92.4554	112.299	94.8599	95.6399	117.207	83.6484	128.134	118.885	126.84	144.88
YCR033W	SNT1	176.671	129.816	146.506	149.715	152.491	136.094	167.208	139.886	171.522	177.144
YCR034W	FEN1	271.944	148.795	173.074	128.09	145.045	144.256	186.899	154.267	182.155	186.471
YCR035C	RRP43	211.161	166.708	150.521	168.886	225.741	161.707	159.433	186.516	219.484	179.272
YCR036W	RBK1	161.918	205.981	159.295	179.869	242.433	182.407	216.748	242.404	202.414	235.941
YCR037C	PHO87	114.228	102.716	100.28	116.971	110.45	123.777	130.909	113.855	126.855	137.083
YCR038C	BUD5	97.1559	113.384	115.005	112.669	124.121	113.339	117.675	126.667	117.957	141.748
YCR039C	MATALPHA2	73.888	70.7599	66.4882	57.9943	65.4848	55.381	94.602	79.4143	65.3931	77.8182
YCR040W	MATALPHA1	36.9704	42.4153	28.6598	40.2377	88.1991	31.1792	70.736	56.261	39.2808	54.9582
YCR042C	TAF2	168.464	134.112	134.569	122.503	156.132	139.457	151.055	151.746	173.618	159.067
YCR043C	YCR043C	217.608	149.187	162.568	122.392	118.983	137.388	137.451	122.587	118.948	101.21
YCR044C	PER1	226.152	143.506	132.826	131.804	124.276	145.842	141.21	125.234	124.03	117.414
YCR045C	YCR045C	121.373	93.3456	117.841	116.598	98.798	88.3358	97.5025	90.5531	113.702	116.361
YCR046C	IMG1	263.867	187.426	267.099	257.914	164.874	159.29	196.539	196.365	202.276	131.82
YCR047C	BUD23	108.521	74.0809	96.7765	131.544	132.35	116.6	88.6041	119.656	137.674	75.8632
YCR048W	ARE1	88.5221	95.7268	151.579	223.163	115.664	145.196	150.873	164.985	146.22	139.074
YCR051W	YCR051W	139.096	117.052	156.367	225.51	128.229	187.881	161.916	105.791	170.162	187.76
YCR052W	RSC6	121.152	161.127	171.261	222.04	175.146	283.291	159.488	198.502	195.021	156.519
YCR053W	THR4	270.14	456.941	374.718	461.774	556.663	556.429	396.921	502.272	460.304	431.253
YCR054C	CTR86	116.869	141.572	107.829	119.521	147.469	137.508	129.456	164.099	133.794	160.747
YCR057C	PWP2	156.26	65.2121	73.6976	89.9898	98.4405	107.641	107.689	104.533	122.784	92.1981
YCR059C	YIH1	131.49	100.818	157.647	169.303	114.913	199.162	101.888	96.5293	180.499	123.292
YCR060W	TAH1	113.996	95.7051	134.839	161.236	148.66	134.613	110.784	134.432	144.125	199.536
YCR061W	YCR061W	121.988	131.879	148.097	208.71	82.6638	120.962	142.126	144.895	119.486	89.7322
YCR063W	BUD31	330.383	187.979	159.421	276.739	202.97	245.563	245.06	224.482	199.138	206.897
YCR065W	HCM1	394.144	282.646	196.899	244.401	253.131	220.538	199.343	275.024	194.488	169
YCR066W	RAD18	112.193	107.638	114.33	95.0816	117.936	93.7993	129.14	107.17	126.847	80.2151
YCR067C	SED4	140.352	116.36	124.364	132.214	116.145	137.79	139.468	139.881	174.611	178.33
YCR068W	ATG15	107.688	117.53	172.518	181.903	109.635	119.637	136.871	131.026	157.581	118.024
YCR069W	CPR4	184.452	219.256	240.293	278.358	236.857	242.784	206.969	300.289	201.654	215.146
YCR071C	IMG2	253.911	275.209	300.497	298.487	358.161	312.976	258.903	294.807	254.774	214.984
YCR072C	RSA4	137.799	65.9008	60.8656	89.8961	105.272	92.5285	99.0865	105.143	92.702	123.01
YCR073C	SSK22	88.8535	72.9327	89.262	80.7146	105.429	83.2971	115.069	94.0001	111.316	132.469
YCR073W-A	SOL2	97.6176	107.404	144.437	178.459	205.227	95.8093	160.989	180.228	166.128	94.7388
YCR075C	ERS1	116.254	111.019	110	135.15	105.602	106.989	121.2	115.595	119.908	171.602
YCR075W-A	YCR075W-A	189.784	173.633	167.266	188.6	134.329	183.619	140.253	159.828	124.47	155.28
YCR076C	YCR076C	125.815	130.866	166.685	155.176	149.247	110.97	156.262	134.037	102.647	118.041
YCR077C	PAT1	161.403	131.177	161.557	159.986	134.768	185.657	144.695	157.824	156.826	192.499
YCR079W	AUP1	152.537	166.1	210.485	197.707	95.5128	211.906	136.792	213.574	162.051	105.683
YCR081W	SRB8	88.4242	97.6517	87.3805	96.4982	101.225	97.3072	107.907	113.31	108.993	104.776
YCR082W	AHC2	207.42	178.86	153.367	158.744	171.631	225.252	236.471	188.118	202.212	168.823
YCR083W	TRX3	181.753	172.495	204.761	253.017	149.592	190.986	150.887	157.633	174.659	150.535
YCR084C	TUP1	225.6	145.176	172.568	188.278	175.734	148.574	180.2	162.56	201.517	176.201
YCR086W	CSM1	129.811	112.747	106.036	111.971	75.3042	98.168	73.9443	128.501	97.3897	98.0597
YCR087C-A	LUG1	144.168	96.9783	118.072	109.076	88.4427	152.11	97.3133	97.414	108.362	80.3065
YCR088W	ABP1	150.828	163.155	169.051	212.763	135.848	169.313	168.15	178.32	172.912	137.535
YCR089W	FIG2	94.1173	149.349	117.269	122.484	123.459	122.457	124.592	118.408	122.517	109.987
YCR090C	YCR090C	142.426	148.498	192.288	104.856	187.047	142.297	174.821	134.12	129.141	130.007
YCR091W	KIN82	81.9517	121.383	112.044	126.404	120.337	79.7955	128.805	134.121	143.197	136.7
YCR092C	MSH3	117.064	120.76	94.3425	99.5738	141.982	93.9662	106.702	116.418	106.212	111.812
YCR093W	CDC39	260.143	192.514	156.746	186.045	193.666	181.546	208.152	192.758	199.476	223.62
YCR094W	CDC50	95.1154	87.6219	97.7645	105.14	85.863	96.8274	152.653	105.302	104.787	178.584
YCR095C	OCA4	110.375	105.117	89.7284	84.0602	90.6199	115.458	136.413	92.9765	98.4195	127.499
YCR096C	HMRA2	86.0952	89.5307	93.1382	65.1811	72.4546	59.7595	128.215	104.155	66.2755	75.5879
YCR097W	HMRA1	245.838	289.568	182.282	181.092	204.811	208.591	221.703	218.147	298.5	252.81
YCR098C	GIT1	35.6647	40.1246	48.9949	64.7024	62.2379	63.4569	77.8561	61.0669	68.5284	115.391
YCR099C	YCR099C	72.3363	125.301	111.004	98.7059	176.304	101.929	143.434	135.13	175.473	127.857
YCR100C	YCR100C	70.0955	116.044	137.13	97.0901	114.269	100.475	196.068	135.085	129.64	110.986
YCR101C	YCR101C	78.3091	128.442	135.438	110.709	137.865	110.606	122.216	124.051	151.739	124.162
YCR102C	YCR102C	37.9235	47.6894	69.414	48.1889	94.4635	72.6405	86.0812	58.9012	75.3474	93.7846
YCR104W	PAU3	38.5516	45.1292	88.5056	71.6113	60.4355	54.3578	74.6365	69.6632	136.589	116.348
YCR105W	ADH7	50.4063	49.228	75.7672	80.6122	87.8023	97.6991	93.9846	64.048	86.135	95.8899
YCR106W	RDS1	69.2981	97.5253	102.55	111.59	175.07	179.311	144.139	162.403	203.142	152.381
YCR107W	AAD3	65.8599	86.7394	107.131	133.145	144.655	159.07	115.816	153.747	143.825	109.02
YCR108C	YCR108C	18.6026	18.8903	20.6448	39.2752	20.0106	37.4414	53.9564	43.4974	23.9527	33.2593
YDL001W	RMD1	123.634	82.9717	98.202	99.8322	94.6828	98.5845	124.3	110.4	101.984	110.541
YDL002C	NHP10	148.36	132.901	127.13	117.694	92.9725	134.815	137.81	135.101	123.85	159.95
YDL003W	MCD1	233.727	74.0811	86.9265	77.7304	107.349	104.045	96.6785	112.942	90.6868	61.6511
YDL004W	ATP16	217.877	155.609	140.172	186.676	146.603	168.77	221.73	237.874	159.12	203.329
YDL005C	MED2	147.269	140.566	124.665	149.213	158.706	168.558	178.415	175.316	179.675	196.089
YDL006W	PTC1	176.57	156.651	170.62	149.114	197.307	159.213	174.304	194.747	231.971	252.325
YDL007C-A	YDL007C-A	33.3938	33.2802	24.5219	40.642	39.4593	45.3459	148.63	40.0201	43.4849	117.573
YDL007W	RPT2	219.161	156.733	154.309	164.134	143.309	169.787	182.357	169.4	207.524	213.246
YDL008W	APC11	238.039	168.568	223.952	172.667	122.478	116.071	150.415	130.448	123.704	179.06
YDL010W	YDL010W	170.056	135.674	320.537	135.56	88.0799	205.63	222.551	180.981	192.328	103.887
YDL012C	YDL012C	248.49	204.936	402.684	275.906	245.536	271.265	249.012	200.486	271.991	201.476
YDL013W	HEX3	125.1	116.121	145.033	145.809	126.527	126.581	149.908	156.788	157.818	135.106
YDL014W	NOP1	398.918	189.679	137.825	242.175	216.108	277.246	239.546	205.593	264.981	235.283
YDL015C	TSC13	223.87	221.913	148.841	180.937	149.208	159.004	205.415	184.395	195.12	148.836
YDL017W	CDC7	99.4258	88.3471	101.149	107.605	90.1214	80.4244	134.343	105.188	115.422	87.8655
YDL018C	ERP3	131.673	96.1207	99.925	119.997	101.797	94.6177	147.626	98.3754	116.757	119.685
YDL019C	OSH2	121.58	140.553	165.18	187.223	133.944	130.856	165.636	162.843	183.812	138.527
YDL020C	RPN4	362.311	311.851	379.346	406.779	309.636	555.016	479.879	379.182	400.638	514.643
YDL021W	GPM2	184.207	266.711	159.83	216.419	207.115	202.205	217.595	232.322	176.143	163.887
YDL022W	GPD1	566.52	985.191	612.977	612.622	424.108	118.58	301.194	479.589	170.23	182.732
YDL024C	DIA3	49.1969	74.3543	91.7831	101.819	79.7739	66.7427	98.8489	104.837	105.978	90.2866
YDL025C	YDL025C	122.539	401.162	249.282	216.942	257.876	232.868	196.235	284.42	212.436	176.671
YDL027C	YDL027C	128.473	170.034	128.495	142.976	155.231	136.139	178.624	151.698	161.757	168.209
YDL028C	MPS1	133.587	102.376	100.795	118.746	157.874	95.2731	150.864	119.4	141.283	166.501
YDL029W	ARP2	189.983	191.66	215.061	226.045	172.718	192.785	206.026	242.18	269.173	223.553
YDL030W	PRP9	97.0973	84.2629	82.7487	101.558	106.282	100.662	105.343	98.9384	108.315	136.71
YDL031W	DBP10	112.615	70.1531	71.9269	82.492	107.83	93.8838	96.8834	87.2359	138.172	121.837
YDL033C	SLM3	222.624	179.379	242.57	279.032	226.743	288.165	244.278	209.6	204.844	278.278
YDL035C	GPR1	135.222	175.509	151.432	157.264	208.065	185.086	201.868	188.92	171.659	202.131
YDL036C	PUS9	109.632	90.2003	106.51	102.282	143.978	108.333	143.01	119.342	136.637	101.296
YDL037C	BSC1	33.6491	51.0955	97.3118	59.0337	90.2449	62.2898	91.4791	92.864	67.7824	121.313
YDL038C	YDL038C	43.3864	73.0984	110.982	96.9846	135.274	52.9599	97.5281	116.434	118.878	109.851
YDL039C	PRM7	95.1386	126.82	129.893	161.029	153.598	99.0986	184.242	193.924	136.06	169.658
YDL040C	NAT1	142.904	122.463	119.884	107.416	142.811	115.615	155.307	140.164	152.07	203.615
YDL042C	SIR2	94.1696	57.4603	81.6564	73.1392	102.593	77.6423	97.3461	68.7441	121.618	91.1125
YDL043C	PRP11	111.724	98.1707	80.7479	101.905	186.677	72.7316	120.282	126.101	102.653	223.831
YDL044C	MTF2	121.835	117.914	100.04	130.334	103.71	96.8464	166.266	123.813	179.074	128.563
YDL045C	FAD1	130.091	149.56	131.124	143.485	113.8	115.02	124.448	178.613	149.365	96.4572
YDL045W-A	MRP10	278.335	340.436	288.594	251.438	201.759	330.609	219.843	275.5	243.045	212.164
YDL046W	NPC2	320.407	445.741	305.9	450.871	312.812	335.965	271.985	452.133	281.686	184.428
YDL047W	SIT4	187.663	137.377	145.933	190.559	123.069	159.77	210.004	186.368	217.807	235.53
YDL048C	STP4	140.351	81.4158	133.626	168.901	92.7849	172.978	132.572	105.095	126.937	92.0949
YDL049C	KNH1	151.612	90.1548	113.511	116.288	203.693	144.891	128.575	117.634	97.5808	121.596
YDL051W	LHP1	232.204	109.257	90.8824	130.286	144.931	159.476	154.157	118.352	177.203	205.047
YDL052C	SLC1	285.402	270.274	236.998	286.903	245.308	265.305	221.83	293.149	154.847	165.434
YDL053C	PBP4	180.555	250.466	173.919	242.08	182.307	219.458	216.339	244.348	188.937	143.932
YDL054C	MCH1	73.9114	434.307	334.309	351.495	316	400.735	228.796	422.628	264.723	198.661
YDL055C	PSA1	1295.22	570.883	433.676	470.637	501.395	382.671	477.049	415.363	422.931	322.493
YDL056W	MBP1	203.252	149.306	141.548	137.198	154.055	132.896	162.153	160.528	136.269	183.973
YDL057W	YDL057W	88.5272	100.24	93.7037	106.736	106.966	73.5062	86.0747	113.678	154.445	96.2798
YDL058W	USO1	99.0032	86.6185	102.077	85.7546	107.628	97.8324	102.283	88.3297	110.223	128.355
YDL059C	RAD59	82.4372	80.2164	99.6262	87.664	61.0291	103.254	98.0484	93.3246	63.7297	84.347
YDL060W	TSR1	137.512	76.9685	80.8023	93.9874	112.027	94.275	93.8597	81.7397	97.8684	113.319
YDL061C	RPS29B	795.268	721.083	550.871	544.156	386.448	535.27	474.402	539.925	513.204	482.929
YDL063C	YDL063C	130.751	59.1315	62.3435	73.3506	119.978	99.1016	84.5384	67.723	101.33	114.195
YDL064W	UBC9	160.8	102.277	81.5205	89.2214	124.392	88.4431	134.35	101.914	119.497	83.3176
YDL065C	PEX19	154.819	262.483	293.57	208.595	306.536	257.683	184.4	299.582	221.368	163.465
YDL066W	IDP1	178.038	516.453	673.097	481.233	547.466	473.433	424.963	684.664	585.359	467.563
YDL067C	COX9	252.219	386.923	417.225	356.89	258.859	433.082	278.65	394.502	302.361	278.243
YDL069C	CBS1	269.338	249.331	248.678	144.763	214.456	224.895	255.315	225.787	242.179	217.994
YDL070W	BDF2	510.136	334.05	385.335	228.09	333.183	262.425	419.583	301.13	304.55	430.95
YDL072C	YET3	269.689	266.564	314.171	277.523	234.822	162.897	220.725	261.389	296.763	247.322
YDL073W	YDL073W	105.497	103.758	122.178	90.0336	127.246	139.34	160.081	118.814	127.942	126.09
YDL074C	BRE1	237.159	168.664	154.031	153.869	155.629	174.574	186.951	163.28	154.273	155.795
YDL075W	RPL31A	870.455	790.118	499.391	466.103	447.391	580.014	437.056	516.539	566.558	491.306
YDL076C	RXT3	148.229	229.496	194	186.399	209.21	226.257	212.25	241.13	269.143	180.601
YDL077C	VAM6	85.5971	95.3646	105.139	100.95	86.6654	80.9407	104.356	97.8489	106.651	103.511
YDL078C	MDH3	114.682	141.43	132.145	156.517	111.36	143.263	147.106	167.767	95.7411	156.771
YDL079C	MRK1	119.109	128.875	107.986	112.67	121.915	111.062	121.237	131.595	117.462	162.796
YDL080C	THI3	165.359	151.587	147.322	168.659	106.524	150.257	150.923	167.743	144.153	117.281
YDL081C	RPP1A	933.523	681.727	505.321	520.299	422.344	470.484	352.338	518.43	388.637	445.557
YDL082W	RPL13A	583.861	496.917	334.661	390.716	271.017	287.248	205.957	309.105	297.264	217.413
YDL083C	RPS16B	779.953	733.21	438.284	453.186	485.166	316.287	291.218	526.48	331.86	367.859
YDL084W	SUB2	337.927	273.202	230.397	225.138	281.371	224.617	251.062	248.544	236.731	235.943
YDL085C-A	YDL085C-A	209.8	244.681	243.375	251.376	199.996	177.598	228.514	193.78	223.207	147.237
YDL085W	NDE2	123.552	164.834	149.919	189.607	167.147	183.402	171.782	228.428	179.292	152.966
YDL086W	YDL086W	236.109	255.964	278.009	313.483	175.205	213.663	175.735	305.529	159.908	116.444
YDL087C	LUC7	116.847	116.886	121.049	135.809	108.902	108.325	102.777	147.649	111.147	107.115
YDL088C	ASM4	190.418	173.407	166.439	161.299	143.216	162.667	172.611	203.95	167.325	170.888
YDL089W	YDL089W	105.977	146.489	141.378	106.504	132.111	114.22	136.883	146.378	124.215	131.842
YDL090C	RAM1	88.4697	101.165	97.374	108.38	112.823	126.47	116.798	116.997	124.733	97.0921
YDL091C	UBX3	116.355	139.506	121.463	128.089	109.845	124.655	123.295	147.108	124.589	144.085
YDL092W	SRP14	201.174	220.875	230.375	214.2	295.005	204.448	208.778	249.389	228.834	257.723
YDL093W	PMT5	94.9035	70.6832	106.358	86.4607	118.647	101.856	134.44	87.3846	103.294	91.608
YDL095W	PMT1	241.829	123.115	177.951	172.613	152.749	160.469	185.307	157.232	174.471	161.918
YDL097C	RPN6	249.181	190.558	211.806	229.421	171.085	234.984	190.956	207.07	177.118	249.623
YDL098C	SNU23	115.64	121.473	120.902	119.567	98.4287	110.354	157.822	136.698	100.1	113.268
YDL099W	BUG1	128.975	128.437	107.908	108.769	97.8311	90.4156	157.696	111.133	134.928	97.7213
YDL100C	GET3	186.24	112.945	131.068	134.629	98.2506	162.157	157.176	132.752	120.567	151.755
YDL101C	DUN1	116.55	73.1205	86.0669	69.966	79.2925	84.0438	124.559	89.2699	106.913	105.253
YDL102W	CDC2	79.8793	57.6579	78.8712	66.8421	81.7938	82.3791	111.701	83.25	107.021	112.167
YDL103C	QRI1	86.5817	88.8324	86.1809	96.5234	145.046	98.1787	134.282	101.267	86.6873	88.9809
YDL104C	QRI7	134.256	138.41	137.213	155.719	126.124	160.75	179.026	173.613	129.626	152.02
YDL105W	NSE4	132.73	130.06	123.011	108.258	114.432	122.735	124.594	137.802	124.397	196.447
YDL106C	PHO2	133.633	131.482	144.071	140.164	130.352	153.652	149.999	130.988	169.438	153.093
YDL107W	MSS2	131.628	135.846	128.671	110.174	115.986	116.653	134.525	121.314	107.243	121.327
YDL108W	KIN28	114.588	116.477	107.893	117.248	99.3831	120.413	149.582	116.866	137.428	159.361
YDL109C	YDL109C	90.5152	96.5093	116.994	129.893	114.423	85.201	129.724	112.013	124.56	139.635
YDL110C	TMA17	333.295	439.057	310.157	529.988	223.347	263.472	287.501	414.591	250.27	251.534
YDL111C	RRP42	202.11	146.774	137.699	167.042	251.662	124.88	165.205	152.6	185.541	344.365
YDL112W	TRM3	119.623	85.5094	80.3136	86.8861	121.948	112.384	117.438	107.257	122.704	108.459
YDL113C	ATG20	102.012	133.864	139.815	150.811	116.891	120.926	158.477	151.849	133.672	131.972
YDL114W	YDL114W	47.9582	57.0569	53.8805	75.4796	78.6663	46.9187	87.7393	71.8985	79.9657	50.502
YDL115C	IWR1	131.295	120.081	119.387	147.858	163.107	157.436	166.809	117.949	135.256	127.191
YDL116W	NUP84	179.373	139.493	138.447	129.083	190.014	136.607	166.98	142.851	233.269	194.47
YDL117W	CYK3	170.856	127.195	136.548	121.117	95.1822	124.037	113.634	126.309	105.38	127.219
YDL119C	YDL119C	100.099	148.083	156.265	146.894	102.786	105.754	119.761	125.57	118.336	82.0644
YDL120W	YFH1	194.507	221.775	211.034	230.523	176.342	282.74	202.158	238.158	273.094	316.707
YDL121C	YDL121C	151.077	125.341	89.9036	117.895	152.142	165.076	118.338	139.853	168.433	302.537
YDL122W	UBP1	190.151	152.106	147.195	147.881	139.007	132.068	144.133	152.619	155.166	142.707
YDL123W	SNA4	328.086	408.147	416.823	385.147	208.805	287.655	247.425	410.949	258.464	163.935
YDL124W	YDL124W	454.226	444.538	394.791	335.886	190.977	276.427	263.095	310.722	186.511	225.081
YDL125C	HNT1	579.266	476.668	522.008	471.735	271.775	357.681	356.513	346.309	315.674	277.74
YDL126C	CDC48	337.733	258.587	261.279	321.026	207.174	274.045	252.878	291.772	245.069	268.608
YDL127W	PCL2	262.385	284.014	170.852	183.657	166.386	164.029	136.695	201.949	134.765	107.757
YDL128W	VCX1	265.703	225.95	238.165	229.291	180.281	211.176	151.947	222.612	181.223	191.974
YDL129W	YDL129W	154.018	120.314	122.458	111.808	128.288	107.22	133.294	107.823	86.0582	101.086
YDL130W	RPP1B	980.28	799.797	631.365	639.817	488.748	424.086	447.623	626.191	460.974	421.115
YDL130W-A	STF1	212.361	376.842	291.851	278.693	219.688	212.143	260.059	352.151	268.712	159.465
YDL131W	LYS21	225.146	574.335	627.494	883.416	785.344	1105.53	621.966	939.697	846.535	672.565
YDL132W	CDC53	142.835	138.088	121.132	163.242	147.587	174.115	164.797	135.469	158.657	149.24
YDL133W	YDL133W	176.003	194.002	166.934	188.037	196.883	157.778	150.904	209.934	191.481	132.993
YDL134C	PPH21	235.244	239.817	264.833	274.892	214.416	228.703	234.503	224.961	205.064	163.418
YDL135C	RDI1	213.559	225.353	168.114	176.969	160.871	143.838	135.232	231.793	148.098	147.032
YDL136W	RPL35B	659.385	518.892	336.923	391.809	349.526	301.872	309.064	427.982	317.419	277.389
YDL137W	ARF2	582.213	481.409	423.283	479.463	369.122	435.709	298.186	396.878	385.929	284.08
YDL138W	RGT2	177.682	177.116	236.16	212.883	188.905	251.325	180.564	216.578	177.348	142.66
YDL139C	SCM3	86.5555	120.774	89.6834	129.858	186.175	72.9373	88.5994	173.122	86.1472	134.167
YDL140C	RPO21	306.238	217.977	244.194	255.241	271.234	241.417	250.81	235.366	244.158	267.724
YDL141W	BPL1	113.004	109.789	142.937	116.122	147.967	147.595	112.839	153.907	186.572	158.261
YDL142C	CRD1	144.514	136.544	137.007	141.145	155.922	105.378	129.447	135.199	137.901	158.016
YDL143W	CCT4	224.447	136.982	146.896	155.982	138.976	159.963	195.264	162.003	185.43	207.486
YDL144C	YDL144C	156.461	129.46	146.632	211.023	96.0857	127.617	140.215	132.511	108.31	129.933
YDL145C	COP1	200.077	158.541	175.19	187.883	144.255	181.682	167.667	166.088	197.957	184.59
YDL146W	LDB17	128.312	198.151	131.5	145.88	122.888	141.206	142.085	184.827	134.94	105.394
YDL147W	RPN5	308.628	223.764	168.835	190.134	231.174	248.714	237.213	278.121	251.641	338.675
YDL148C	NOP14	113.49	64.241	59.1977	79.6098	132.69	91.402	71.0312	71.1619	105.308	123.685
YDL149W	ATG9	79.5375	79.1847	82.1376	84.8309	94.8719	79.1549	88.8403	97.6415	110.258	77.4419
YDL150W	RPC53	125.843	74.5536	78.0781	99.2456	98.7178	91.416	95.9279	96.7022	99.2441	100.559
YDL153C	SAS10	107.513	57.7168	62.5167	71.6668	84.0335	79.5244	102.171	59.4147	93.0541	128.618
YDL154W	MSH5	90.6766	71.3842	56.4998	66.2791	81.5486	45.0678	106.581	96.3571	107.168	69.2963
YDL155W	CLB3	209.279	122.033	128.549	142.365	145.496	202.164	153.959	149.362	173.618	201.111
YDL156W	YDL156W	99.5238	80.4158	84.228	108.22	97.0886	122.152	107.295	97.93	93.4973	105.822
YDL157C	YDL157C	145.891	141.517	125.081	123.363	123.251	101.054	149.151	205.709	144.165	105.307
YDL159W	STE7	113.035	106.541	102.497	112.796	141.952	147.835	144.5	137.957	147.771	164.809
YDL160C	DHH1	221.636	239.069	212.457	253.851	207.242	214.068	236.968	252.775	250.545	271.252
YDL160C-A	YDL160C-A	156.368	150.945	124.164	140.985	281.578	106.379	157.598	160	105.249	97.3159
YDL161W	ENT1	199.73	163.872	219.198	249.23	163.606	162.005	165.063	186.586	220.115	158.216
YDL164C	CDC9	109.414	64.5433	86.3962	62.8903	97.9001	82.6955	95.9721	71.1377	91.3036	87.0585
YDL165W	CDC36	152.166	125.926	127.556	105.108	155.652	146.442	165.674	119.134	112.981	178.343
YDL166C	FAP7	154.794	142.152	138.158	136.441	130.596	128.086	119.624	164.13	105.924	158.139
YDL167C	NRP1	152.742	134.504	117.639	105.354	111.808	111.784	122.761	119.601	155.084	116.024
YDL168W	SFA1	103.594	127.368	131.059	128.934	129.318	125.151	202.648	141.275	190.471	141.42
YDL169C	UGX2	58.434	213.215	170.586	199.793	217.663	144.094	155.66	296.366	198.376	186.702
YDL170W	UGA3	90.5388	510.056	326.535	402.477	394.079	368.781	283.259	567.059	430.45	274.282
YDL171C	GLT1	159.218	240.625	271.1	276.002	258.688	246.276	219.038	299.732	254.925	224.181
YDL173W	YDL173W	142.521	183.647	272.679	248.316	145.919	245.349	199.399	218.14	276.661	182.016
YDL174C	DLD1	160.416	188.223	255.81	256.885	157.973	212.481	186.209	216.544	193.954	194.641
YDL175C	AIR2	171.027	186.013	188.412	194.089	279.59	240.792	220.239	270.367	208.344	194.893
YDL176W	YDL176W	111.899	101.381	104.705	88.8974	166.668	113.771	118.151	113.147	125.795	122.105
YDL177C	YDL177C	132.067	173.787	182.222	169.214	215.186	194.02	110.774	154.14	206.177	99.4626
YDL178W	DLD2	137.841	156.746	128.559	146.282	120.74	157.157	152.75	141.175	159.817	146.927
YDL179W	PCL9	241.093	166.852	167.068	151.981	103.62	133.641	142.19	147.986	139.15	99.3059
YDL180W	YDL180W	126.982	181.52	200.531	171.335	136.453	207.758	186.481	204.586	155.132	180.905
YDL181W	INH1	289.211	367.819	351.154	399.728	304.65	315.704	314.285	268.765	171.97	195.519
YDL182W	LYS20	285.561	957.65	1366.84	1332.06	2124.74	1388.47	1663.95	1522.44	1533.95	1376.11
YDL183C	YDL183C	95.7193	190.207	193.504	166.533	133.751	142.724	137.868	217.722	149.869	113.404
YDL185W	TFP1	314.624	307.608	270.824	314.882	236.335	262.433	245.665	302.232	275.462	246.038
YDL186W	YDL186W	166.819	172.298	149.215	159.869	179.665	118.546	131.299	146.997	216.17	161.977
YDL188C	PPH22	149.609	148.807	164.753	164.39	151.425	131.242	203.127	153.512	204.254	153.645
YDL189W	RBS1	147.93	142.65	147.308	156.021	145.173	141.767	182.728	173.365	158.155	171.638
YDL190C	UFD2	158.111	181.909	172.265	166.308	163.753	164.083	159.089	186.636	163.603	138.836
YDL191W	RPL35A	867.623	804.957	572.133	566.69	418.477	465.064	333.254	562.991	393.926	391.736
YDL192W	ARF1	504.761	350.3	356.351	321.822	272.929	335.892	271.565	356.265	325.161	240.537
YDL193W	NUS1	198.045	158.856	118.089	164.934	131.885	112.1	141.04	159.978	183.377	120.147
YDL194W	SNF3	51.7686	56.5318	60.6767	65.6478	105.502	75.8626	82.5094	65.1396	77.3401	73.0838
YDL195W	SEC31	237.295	189.489	235.086	235.615	219.754	205.141	220.918	214.952	244.366	200.092
YDL197C	ASF2	132.44	127.654	143.482	201.607	128.666	164.14	162.866	157.608	148.221	166.272
YDL198C	GGC1	220.057	1098.49	529.015	627.113	614.191	747.767	432.446	1114.43	559.341	555.62
YDL199C	YDL199C	67.3837	142.208	114.837	101.131	122.648	94.2212	126.015	172.488	115.105	111.246
YDL200C	MGT1	133.408	126.818	130.924	107.193	111.056	147.594	141.862	137.37	104.628	99.7145
YDL201W	TRM8	154.216	127.149	95.537	140.685	183.582	133.808	107.005	112.156	135.858	118.354
YDL202W	MRPL11	182.774	148.321	120.538	158.53	143.021	115.281	158.629	123.551	124.568	135.798
YDL203C	ACK1	101.765	98.7778	94.8714	100.009	121.824	119.182	143.102	102.377	147.156	122.953
YDL204W	RTN2	163.188	250.942	146.315	165.403	149.769	107.339	156.975	123.561	139.739	135.025
YDL205C	HEM3	170.663	146.638	142.769	146.601	148.663	109.241	146.515	151.269	152.794	137.975
YDL206W	YDL206W	96.0855	123.058	103.322	119.613	127.435	108.616	136.607	130.347	129.029	104.399
YDL207W	GLE1	137.955	119.483	119.851	130.752	169.236	146.725	155.804	139.977	164.351	116.964
YDL208W	NHP2	348.554	176.696	106.784	178.114	183.464	146.863	157.356	174.027	294.929	130.871
YDL209C	CWC2	115.303	81.6159	77.3923	109.847	97.6927	116.3	113.281	90.2968	109.223	105.164
YDL210W	UGA4	64.3776	66.2566	68.7486	68.0809	66.4036	57.0617	82.525	93.7369	93.7064	61.5155
YDL211C	YDL211C	123.75	84.1437	95.8147	82.9518	89.6466	82.8628	132.749	98.7738	108.719	112.512
YDL212W	SHR3	174.053	132.595	111.401	146.283	125.862	135.557	144.736	148.268	161.865	196.58
YDL213C	NOP6	114.264	77.2822	81.2173	97.2084	103.914	103.63	119.009	89.0261	174.291	151.062
YDL214C	PRR2	51.3597	104.2	105.106	121.882	83.2207	88.9747	72.2792	140.244	76.655	87.0677
YDL215C	GDH2	178.126	194.802	165.615	167.926	171.881	198.993	185.993	188.031	227.626	167.232
YDL216C	RRI1	100.859	124.58	114.569	124.323	121.93	114.102	108.048	134.274	133.322	97.8589
YDL217C	TIM22	154.66	148.373	141.322	189.506	115.52	143.291	173.742	167.127	249.871	119.688
YDL218W	YDL218W	73.4996	75.4976	89.7618	115.485	86.7386	68.9102	107.823	85.7275	84.7297	78.4083
YDL219W	DTD1	148.256	116.45	68.8985	89.4782	189.192	73.0027	140.865	126.859	94.2865	175.628
YDL220C	CDC13	97.9861	92.8672	112.615	139.247	110.357	107.416	113.507	124.734	159.59	133.611
YDL222C	FMP45	153.978	430.988	192.293	218.79	114.241	115.276	134.454	131.003	156.56	99.2584
YDL223C	HBT1	91.5922	199.352	135.146	112.972	95.1002	73.923	112.394	113.72	87.1107	80.0457
YDL224C	WHI4	222.783	195.045	194.483	225.512	266.511	203.339	233.843	240.152	213.726	205.504
YDL225W	SHS1	137.792	118.58	138.611	140.527	119.527	159.242	144.628	115.227	156.503	124.774
YDL226C	GCS1	167.582	139.095	149.94	159.254	132.891	129.463	154.797	152.968	168.398	231.273
YDL227C	HO	258.537	66.2637	102.072	51.2094	114.44	64.7635	133.017	111.431	87.8939	77.6429
YDL229W	SSB1	728.844	368.61	306.746	385.13	389.513	458.219	278.952	344.231	432.696	367.975
YDL230W	PTP1	98.4584	103.743	119.283	108.235	116.22	77.1423	132.254	127.968	103.312	132.779
YDL231C	BRE4	153.495	116.332	129.798	128.308	166.048	150.798	153.85	126.768	138.921	167.602
YDL233W	YDL233W	77.8447	84.8948	101.636	111.576	73.1196	85.2901	100.087	85.1416	111.754	94.1515
YDL234C	GYP7	98.0406	164.582	236.355	138.118	114.157	175.825	161.854	162.074	182.67	133.589
YDL235C	YPD1	231.845	221.603	183.087	195.163	232.155	213.395	230.691	205.199	174.236	219.363
YDL236W	PHO13	176.241	161.905	178.625	159.917	172.237	143.664	149.578	199.9	168.285	149.958
YDL237W	YDL237W	112.244	129.018	124.016	115.805	172.962	124.042	127.613	129.962	106.398	135.269
YDL238C	GUD1	94.7641	137.368	160.952	138.96	106.7	93.9072	122.512	151.995	92.4682	187.285
YDL239C	ADY3	89.3762	122.253	97.8139	85.1211	103.902	72.7732	97.6056	140.32	94.3966	67.5193
YDL240W	LRG1	134.302	113.408	101.019	92.8731	131.213	119.755	131.535	121.391	139.461	125.702
YDL241W	YDL241W	45.448	55.1859	73.5729	47.4188	118.974	113.906	163.776	54.3901	106.839	85.9242
YDL243C	AAD4	61.0149	61.0612	95.4809	69.1412	68.2038	79.6322	93.7885	75.9385	73.2581	78.4741
YDL244W	THI13	40.8947	42.7157	85.492	68.0207	93.9983	77.4366	91.5373	61.5115	64.6945	64.761
YDL245C	HXT15	40.7851	43.4063	68.011	57.3522	128.024	80.0257	106.845	69.758	101.984	120.706
YDL246C	SOR2	40.0032	35.5781	52.2489	46.99	60.265	53.3507	72.6086	56.3617	66.8673	47.4402
YDL247W	MPH2	62.8716	69.5884	80.4288	83.4116	105.339	86.2381	117.181	89.2367	113.468	116.116
YDL248W	COS7	90.6337	98.8886	109.855	93.656	113.814	93.3798	111.872	137.318	150.337	99.0339
YDR001C	NTH1	211.232	354.51	279.458	285.003	201.618	212.038	254.355	286.449	225.634	207.633
YDR002W	YRB1	265.629	177.996	155.692	171.703	225.911	191.471	155.725	154.29	133.768	204.168
YDR003W	RCR2	165.632	166.387	190.957	201.194	152.411	196.735	147.247	192.787	180.013	161.049
YDR004W	RAD57	168.826	145.683	147.657	122.585	169.181	163.947	225.57	187.996	149.118	150.438
YDR005C	MAF1	160.939	140.761	136.298	138.601	121.912	153.116	133.127	125.381	162.778	206.234
YDR006C	SOK1	181.229	159.884	161.071	188.046	169.023	192.153	180.111	147.59	211.153	180.444
YDR007W	TRP1	240.697	225.79	235.533	258.229	209.125	169.422	225.036	199.792	188.519	182.788
YDR009W	GAL3	58.8112	99.673	113.662	140.525	106.833	123.21	130.161	95.2695	82.602	98.3049
YDR011W	SNQ2	170.791	385.452	422.976	341.706	460.97	378.473	480.307	293.203	339.661	374.592
YDR012W	RPL4B	762.904	438.032	415.269	498.538	426.235	430.104	343.805	377.577	373.517	423.926
YDR013W	PSF1	222.117	173.965	144.534	120.965	247.156	178.646	170.821	183.21	129.734	100.039
YDR014W	RAD61	81.3002	74.0375	86.1044	67.7965	87.7913	76.6097	101.673	86.0682	116.776	122.681
YDR014W-A	HED1	97.8046	102.456	119.654	92.8392	114.46	109.581	107.048	133.532	106.192	83.5665
YDR016C	DAD1	188.254	186.19	150.337	179.693	183.046	207.964	199.22	205.921	153.229	188.087
YDR017C	KCS1	177.017	115.631	113.617	135.469	143.806	138.652	150.86	132.428	138.189	140.361
YDR018C	YDR018C	96.1678	121.759	87.9259	90.674	115.939	89.7839	115.127	88.008	96.0195	82.1938
YDR019C	GCV1	194.329	486.952	220.432	153.587	153.501	106.206	149.772	218.603	111.519	97.6504
YDR020C	YDR020C	149.358	158.974	138.215	111.917	144.378	136.353	110.832	131.287	148.787	133.746
YDR021W	FAL1	95.2887	68.8259	75.5793	74.7625	109.209	76.9728	131.981	90.528	119.549	96.9676
YDR022C	CIS1	114.072	103.343	136.889	115.748	125.868	131.559	172.294	115.825	220.725	127.129
YDR023W	SES1	281.188	201.916	148.946	180.69	185.038	203.538	168.154	188.997	196.032	142.673
YDR025W	RPS11A	925.462	803.288	610.665	624.711	423.874	435.229	404.507	604.841	497.242	410.57
YDR026C	YDR026C	157.301	154.577	148.521	140.402	181.187	134.714	163.52	168.641	169.369	135.459
YDR027C	VPS54	144.96	151.305	145.981	134.942	178.83	130.749	178.587	157.909	169.094	150.487
YDR028C	REG1	155.579	162.472	155.75	184.625	196.233	140.546	160.742	162.68	214.371	183.835
YDR030C	RAD28	120.503	107.581	90.7059	109.46	129.3	112.279	129.132	108.361	112.253	120.913
YDR031W	MIC14	157.513	213.094	115.959	157.728	162.585	127.247	159.11	186.658	179.312	131.185
YDR032C	PST2	199.196	291.503	241.927	292.332	201.347	179.994	216.846	197.326	249.811	141.399
YDR033W	MRH1	1263.96	720.021	762.986	146.754	723.562	115.231	1105.36	211.872	160.393	208.819
YDR034C	LYS14	196.022	321.611	289.543	266.797	356.955	340.579	325.386	339.054	297.785	290.582
YDR034C-A	YDR034C-A	178.117	169.533	80.7305	114.834	159.142	80.7231	230.053	99.231	150.2	255.978
YDR034C-C	YDR034C-C	146.141	135.449	133.653	162.409	137.274	184.933	150.608	149.805	154.652	133.941
YDR034C-D	YDR034C-D	165.42	167.752	179.569	176.173	194.999	204.481	190.949	181.588	178.81	172.899
YDR035W	ARO3	180.835	1066.62	698.082	1019.74	1069.92	1029.14	803.904	1252.57	905.016	710.19
YDR036C	EHD3	129.424	223.264	188.691	231.449	254.2	188.131	198.817	246.478	204.292	151.695
YDR037W	KRS1	321.474	602.957	501.692	546.959	633.362	712.941	467.971	739.407	584.217	527.572
YDR038C	ENA5	144.433	171.435	291.682	208.21	250.957	174.568	253.287	203.738	229.644	254.957
YDR039C	ENA2	144.256	158.578	283.429	202.982	239.146	158.532	247.03	184.861	228.088	273.202
YDR040C	ENA1	148.503	179.642	354.813	219.092	287.157	165.229	297.215	211.121	251.744	307.329
YDR041W	RSM10	177.332	213.672	241.409	226.536	228.745	174.632	151.709	187.405	222.892	173.837
YDR042C	YDR042C	94.173	125.49	151.444	104.187	145.433	126.836	179.105	130.61	102.488	109.971
YDR043C	NRG1	374.801	824.355	587.418	485.218	617.016	338.776	492.245	384.161	343.445	391.932
YDR044W	HEM13	97.6725	98.4081	119.495	88.8395	89.8498	80.9817	122.148	88.4541	128.543	83.961
YDR045C	RPC11	193.049	108.472	151.642	136.009	175.885	83.7409	145.693	109.273	191.758	134.036
YDR046C	BAP3	336.465	576.724	648.708	622.645	697.279	576.387	480.027	562.228	717.416	550.647
YDR047W	HEM12	237.925	138.089	179.292	181.835	140.589	193.922	158.329	106.645	169.568	199.252
YDR049W	YDR049W	114.383	92.4653	98.296	93.9364	109.009	158.933	104.979	95.533	113.841	98.8816
YDR050C	TPI1	1667.68	1219.42	866.928	582.785	660.071	709.945	482.116	943.273	441.857	532.76
YDR051C	YDR051C	157.378	130.055	119.977	124.446	177.143	119.45	128.477	159.41	158.663	112.174
YDR052C	DBF4	164.861	96.5546	120.363	105.545	111.299	127.084	134.715	107.485	131.656	129.287
YDR054C	CDC34	200.708	174.146	180.227	252.382	140.549	185.238	250.221	189.814	201.981	215.15
YDR055W	PST1	322.338	330.662	389.563	231.279	294.192	130.775	302.343	182.079	189.223	194.424
YDR056C	YDR056C	218.199	231.867	235.215	187.531	197.401	138.451	180.928	194.123	190.699	166.749
YDR057W	YOS9	97.1367	109.288	111.108	120.457	99.8505	95.1552	124.593	126.358	140.108	115.02
YDR058C	TGL2	87.747	117.052	106.49	100.842	81.036	77.7543	106.521	132.019	173.609	112.512
YDR059C	UBC5	120.784	172.041	130.41	161.583	208.15	200.458	133.185	175.967	179.928	155.687
YDR060W	MAK21	176.92	75.8033	84.0536	99.1816	144.711	108.168	146.371	85.3397	137.913	118.056
YDR061W	YDR061W	140.181	138.701	161.939	148.692	145.053	125.448	137.747	156.914	127.294	199.893
YDR062W	LCB2	198.544	196.308	198.393	169.642	154.809	148.385	185.867	169.986	201.602	147.778
YDR063W	YDR063W	270.061	406.863	305.202	305.623	254.286	248.294	198.093	332.637	301.018	173.237
YDR064W	RPS13	1324.87	1104.27	734.31	768.179	687.088	683.924	480.675	794.782	691.538	524.401
YDR065W	YDR065W	205.318	204.553	162.99	156.762	228.142	135.205	171.609	173.895	148.945	110.62
YDR066C	YDR066C	189.433	182.932	183.796	159.497	171.797	152.595	128.54	162.487	135.137	182.928
YDR067C	OCA6	146.284	182.714	126.299	149.415	254.135	166.331	213.77	178.151	151.619	133.228
YDR068W	DOS2	122.38	139.102	132.266	159.651	192.241	159.101	182.371	149.349	157.649	147.941
YDR069C	DOA4	112.814	186.785	136.758	136.078	181.035	116.009	169.2	197.196	172.495	124.702
YDR070C	FMP16	214.727	378.241	198.503	193.862	337.272	147.547	149.505	289.441	145.778	120.108
YDR071C	PAA1	211.299	228.347	201.369	232.089	333.722	177.013	221.151	209.454	147.337	233.26
YDR072C	IPT1	308.369	240.581	258.034	289.379	186.963	208.923	237.235	236.496	199.934	226.437
YDR073W	SNF11	358.899	334.097	323.3	392.559	250.698	279.509	293.219	244.111	270.369	167.969
YDR074W	TPS2	420.099	793.67	509.952	652.182	377.505	228.952	378.391	464.801	284.801	195.414
YDR075W	PPH3	107.958	86.8094	95.0042	91.8051	119.237	113.705	101.696	108.094	95.9029	99.7261
YDR076W	RAD55	223.977	247.243	241.719	307.49	237.143	246.836	231.569	296.759	234.951	213.247
YDR077W	SED1	1434.06	2067.43	2426.58	1748.76	1856.8	293.867	2000.22	1399.24	1709.57	1401.78
YDR078C	SHU2	540.83	820.127	791.751	439.111	857.949	203.94	681.381	573.735	602.388	484.897
YDR079C-A	TFB5	231.031	288.723	253.962	239.866	228.742	296.697	252.639	292.373	253.294	293.132
YDR079W	PET100	178.142	206.102	217.988	212.663	165.28	265.815	262.553	208.278	163.991	173.723
YDR080W	VPS41	76.2175	136.318	118.145	97.9165	166.947	161.375	131.857	158.748	128.677	135.74
YDR081C	PDC2	118.726	112.207	105.932	97.2754	178.613	123.65	155.61	113.74	134.304	128.902
YDR082W	STN1	109.885	97.1852	87.169	99.2009	126.927	107.601	139.309	109.926	112.921	118.687
YDR083W	RRP8	148.564	101.354	85.3643	99.7125	137.169	115.528	116.141	104.65	124.861	103.663
YDR084C	TVP23	129.643	136.645	159.815	117.457	127.454	146.623	118.577	125.833	107.39	113.359
YDR085C	AFR1	103.324	194.36	111.493	101.845	105.357	96.7828	106.979	141.467	108.184	144.635
YDR086C	SSS1	388.37	426.075	179.964	287.65	246.132	313.175	318.914	252.488	333.595	181.859
YDR087C	RRP1	177.933	106.403	139.624	100.979	144.049	152.825	142.919	109.691	132.505	225.871
YDR088C	SLU7	96.3827	99.1337	91.2284	96.6612	118.666	116.759	133.317	122.967	110.53	128.718
YDR089W	YDR089W	143.773	127.801	86.3928	83.8796	140.432	95.7988	140.329	105.176	104.153	83.2501
YDR090C	YDR090C	111.34	121.877	130.934	125.089	141.395	196.74	149.644	162.842	180.766	173.789
YDR091C	RLI1	234.293	117.492	86.7677	117.792	186.748	137.083	135.87	118.47	153.831	161.276
YDR092W	UBC13	262.146	247.699	309.094	244.366	205.75	247.663	255.196	202.155	219.776	197.506
YDR093W	DNF2	133.761	92.1385	108.412	127.317	144.36	116.979	129.203	126.012	134.575	165.342
YDR096W	GIS1	141.576	144.72	147.327	145.155	137.067	103.752	143.049	127.964	109.884	119.604
YDR097C	MSH6	90.7328	48.1556	59.2725	53.9289	87.0995	71.706	94.6717	70.1408	88.5371	81.0108
YDR098C	GRX3	195.812	130.667	160.306	149.303	149.687	176.689	152.956	148.965	180.271	141.781
YDR098C-A	YDR098C-A	240.348	284.391	302.531	188.562	197.031	187.815	190.062	218.841	193.365	149.961
YDR098C-B	YDR098C-B	223.725	266.822	292.172	171.363	214.708	188.418	192.841	208.246	185.101	163.525
YDR099W	BMH2	328.509	419.146	337.962	487.931	297.543	338.322	363.949	446.084	297.959	385.865
YDR100W	TVP15	176.981	250.405	220.666	241.523	212.7	181.298	177.566	238.822	264.947	152.071
YDR101C	ARX1	165.388	87.7929	85.2853	103.301	116.003	140.61	109.485	104.191	144.307	146.533
YDR103W	STE5	141.938	120.705	111.52	118.156	138.09	140.894	139.209	138.68	165.465	153.053
YDR104C	SPO71	75.7308	74.8308	74.7559	77.1295	74.4859	66.8648	100.551	83.8096	97.3946	80.9629
YDR105C	TMS1	130.308	152.397	139.017	162.029	158.47	170.558	181.177	173.212	207.798	167.86
YDR106W	ARP10	134.865	160.837	109.099	123.683	125.2	168.794	167.487	154.541	181.84	208.449
YDR107C	YDR107C	109.325	125.382	106.57	109.779	107.559	118.136	143.513	142.426	125.275	154.183
YDR108W	GSG1	94.8134	95.4878	101.086	97.5105	100.082	133.637	132.356	118.506	122.837	138.093
YDR109C	YDR109C	85.6355	73.5364	96.7973	93.7548	88.4591	90.1142	118.413	123.263	104.575	88.7925
YDR110W	FOB1	132.241	97.029	85.8177	128.312	117.08	140.354	115.21	128.248	150.269	154.534
YDR111C	ALT2	117.956	72.5457	91.9527	145.927	69.9823	128.579	89.2769	151.44	104.633	92.4559
YDR113C	PDS1	139.526	124.488	91.0951	123.082	96.5507	81.4669	138.937	113.548	162.325	80.4527
YDR115W	YDR115W	233.681	210.239	259.95	195.195	165.421	219.829	189.798	214.119	198.571	220.065
YDR116C	MRPL1	181.622	160.548	184.219	177.852	142.228	169.749	179.91	126.419	169.974	152.352
YDR117C	TMA64	117.497	107.588	98.3061	101.287	124.668	130.404	128.008	115.73	112.74	104.324
YDR118W	APC4	122.98	104.563	106.707	95.0312	118.652	114.074	141.066	117.092	102.775	108.913
YDR119W	YDR119W	160.753	159.405	128.075	139.948	134.155	153.787	164.565	176.041	174.077	144.786
YDR119W-A	YDR119W-A	119.978	329.989	192.616	161.04	391.121	140.29	223.506	183.336	217.083	122.326
YDR120C	TRM1	117.945	101.911	77.9794	101.217	140.065	130.151	137.299	117.731	168.14	187.952
YDR121W	DPB4	109.047	82.6261	102.271	87.6461	87.8123	134.515	98.7081	127.943	96.1359	76.3588
YDR122W	KIN1	154.855	154.16	168.077	195.268	146.661	155.467	158.301	181.057	184.776	150.842
YDR123C	INO2	116.779	72.2258	89.3769	148.499	85.1984	150.218	121.119	99.4603	118.821	122.562
YDR124W	YDR124W	148.55	151.017	147.227	134.096	126.004	147.125	137.4	139.16	124.497	103.593
YDR125C	ECM18	93.7212	113.009	94.9922	101.253	112.285	74.3271	136.297	145.493	107.18	124.06
YDR126W	SWF1	236.428	872.705	835.728	874.567	660.354	797.454	623.226	971.294	786.395	724.904
YDR127W	ARO1	181.722	488.058	500.131	516.701	391.464	478.44	415.552	584.995	426.051	401.143
YDR128W	YDR128W	98.3125	87.6459	102.766	103.476	118.532	109.184	122.59	120.766	111.247	119.6
YDR129C	SAC6	219.377	229.369	261.046	252.487	184.242	200.096	201.958	236.148	191.306	222.691
YDR130C	FIN1	153.362	118.509	115.057	129.879	153.629	105.702	154.346	120.273	104.811	121.708
YDR131C	YDR131C	83.3144	87.6209	78.2724	72.3486	86.758	92.6205	86.1388	88.3973	78.971	87.5211
YDR132C	YDR132C	142.274	128.954	116.193	102.724	127.939	115.519	181.832	109.397	119.937	135.727
YDR134C	YDR134C	1685.09	1875.58	1369.23	1105.75	1387.78	424.395	1691.06	770.383	996.681	1095.89
YDR135C	YCF1	192.247	223.386	195.306	228.606	194.699	172.517	200.386	199.571	205.454	215.164
YDR137W	RGP1	98.5328	92.7792	86.5282	95.1831	123.215	99.6981	150.727	111.71	128.586	117.394
YDR138W	HPR1	141.44	149.718	142.374	158.657	173.175	212.78	202.362	184.768	196.155	198.91
YDR139C	RUB1	186.141	162.348	155.111	134.779	153.68	143.073	176.682	177.561	157.558	219.717
YDR140W	MTQ2	207.289	159.601	155.874	195.212	152.987	159.516	155.123	140.995	194.239	220.124
YDR141C	DOP1	128.588	130.928	134.242	127.973	147.227	139.853	141.448	134.951	141.591	152.652
YDR142C	PEX7	114.18	123.68	161.747	119.296	119.42	137.231	163.092	135.753	136.523	114.608
YDR143C	SAN1	183.746	179.92	215.174	224.357	225.078	274.719	203.091	227.652	258.181	184.371
YDR144C	MKC7	160.47	100.73	97.0667	121.934	106.763	112.973	130.629	148.939	115.36	127.793
YDR145W	TAF12	162.831	124.639	151.83	149.892	134.998	153.655	175.93	154.941	144.465	138.24
YDR146C	SWI5	176.747	101.244	142.868	87.7707	151.223	127.648	155.327	110.809	112.398	115.783
YDR147W	EKI1	169.809	107.633	104.742	92.408	115.729	128.998	134.532	132.776	135.317	110.181
YDR148C	KGD2	144.571	161.728	146.74	159.627	113.883	148.318	185.279	147.666	163.267	142.459
YDR150W	NUM1	128.712	96.8477	95.5139	115.12	114.831	107.039	124.448	116.872	120.175	117.163
YDR151C	CTH1	243.72	232.806	235.516	261.301	196.013	295.576	248.877	213.248	203.901	224.073
YDR152W	GIR2	199.675	137.623	149.996	183.378	125.727	179.098	177.973	150.159	144.484	152.43
YDR153C	ENT5	215.13	155.489	137.042	195.542	153.303	168.999	188.399	154.844	148.899	121.343
YDR155C	CPR1	991.189	1022.82	1093.81	1271.65	497.869	610.71	815.36	685.026	496.93	444.694
YDR156W	RPA14	359.069	338.295	233.794	416.103	265.58	441.136	301.795	268.763	284.333	289.733
YDR158W	HOM2	264.539	985.662	660.17	1297.81	723.996	1181.97	530.499	1194.01	798.633	541.319
YDR159W	SAC3	111.331	109.043	104.282	98.1285	114.03	129.476	134.725	119.182	120.757	120.474
YDR160W	SSY1	91.5608	92.6062	122.632	101.537	87.5572	100.11	114.352	98.4919	122.397	121.055
YDR161W	YDR161W	122.939	85.6181	87.0615	107.441	136.042	109.756	152.481	100.853	148.681	153.965
YDR162C	NBP2	115.627	142.048	154.626	150.115	144.973	171.158	147.307	164.445	159.456	136.162
YDR163W	CWC15	129.988	174.922	154.798	148.617	198.524	178.094	170.189	222.251	204.883	118.435
YDR164C	SEC1	89.4565	89.4389	104.431	95.8674	138.043	134.458	107.568	122.053	148.319	126.816
YDR165W	TRM82	196.391	114.203	90.6345	115.599	151.812	123.027	115.774	127.575	136.105	123.124
YDR166C	SEC5	120.32	109.259	86.4613	106.606	100.867	113.315	123.978	119.69	144.351	112.539
YDR167W	TAF10	136.985	123.586	133.301	152.118	116.641	113.902	115.857	118.518	121.686	120.75
YDR168W	CDC37	135.749	128.31	115.761	111.283	213.923	96.8825	135.942	159.555	129.962	133.06
YDR169C	STB3	142.473	159.45	179.921	180.494	153.136	143.156	204.506	181.888	190.895	158.44
YDR170C	SEC7	138.88	109.57	127.922	128.19	141.569	131.039	163.948	119.813	144.835	158.716
YDR170W-A	YDR170W-A	101.069	175.178	196.459	135.334	144.43	210.008	128.793	211.078	161.058	139.82
YDR171W	HSP42	214.644	307.921	541.805	379.447	252.152	260.359	365.667	264.545	232.25	260.27
YDR172W	SUP35	270.078	181.188	177.61	218.831	216.258	213.048	201.402	206.25	223.233	226.529
YDR173C	ARG82	209.199	177.463	150.957	195.613	182.072	176.924	224.17	190.409	171.219	175.966
YDR174W	HMO1	430.214	280.443	268.02	301.601	257.57	317.113	243.986	280.491	278.985	270.776
YDR175C	RSM24	155.872	142.196	159.785	140.477	139.749	133.66	138.15	156.844	178.622	166.863
YDR176W	NGG1	170.333	120.955	110.241	128.933	150.308	154.513	152.016	130.253	173.952	156.848
YDR177W	UBC1	238.965	180.958	184.85	210.413	188.491	223.125	290.306	157.36	187.927	206.98
YDR178W	SDH4	136.723	160.583	192.381	204.99	121.881	151.659	201.447	166.148	146.971	115.191
YDR179C	CSN9	96.3369	100.697	94.3721	90.586	92.8714	71.5083	168.054	88.3231	102.257	113.492
YDR179W-A	YDR179W-A	101.865	109.592	103.21	95.6335	120.209	180.22	123.407	135.499	128.792	158.876
YDR180W	SCC2	89.0536	55.963	64.749	57.7044	86.0664	81.1395	89.137	81.2662	75.7489	82.1706
YDR181C	SAS4	94.164	84.9849	110.928	88.4049	81.7848	119.792	111.776	99.986	136.926	109.44
YDR182W	CDC1	119.015	111.403	105.11	114.074	163.427	107.913	143.986	121.629	141.436	139.813
YDR182W-A	YDR182W-A	221.606	179.956	265.929	174.362	181.883	214.377	207.363	195.124	207.694	180.772
YDR183W	PLP1	94.6946	91.3368	93.1151	85.1819	82.085	100.245	119.603	98.6291	115.745	84.6756
YDR184C	ATC1	124.447	66.3534	59.6244	69.8652	82.0232	78.2619	75.9124	95.0594	118.119	59.091
YDR185C	YDR185C	157.604	141.575	133.691	205.336	137.268	206.241	112.659	123.822	138.644	98.062
YDR186C	YDR186C	210.15	280.311	292.957	338.611	277.328	343.666	299.39	345.399	276.05	270.728
YDR188W	CCT6	275.281	159.249	240.035	267.52	196.913	255.309	194.87	197.106	204.491	204.769
YDR189W	SLY1	153.414	111.778	112.427	128.266	158.226	126.833	142.094	131.651	135.686	136.732
YDR190C	RVB1	231.196	116.729	123.865	153.686	170.876	156.244	168.504	136.3	165.997	203.09
YDR191W	HST4	99.0377	91.1906	85.57	98.4245	103.209	107.937	112.383	112.596	100.607	117.872
YDR192C	NUP42	80.6728	87.0227	97.0999	120.825	103.161	94.8172	108.642	104.051	125.755	118.556
YDR194C	MSS116	217.24	198.476	155.938	160.026	218.018	140.551	171.099	175.824	182.038	230.88
YDR195W	REF2	179.552	172.982	149.725	158.152	152.868	161.631	193.31	157.588	185.502	202.774
YDR196C	YDR196C	140.636	156.663	129.684	136.33	111.454	132.912	142.779	142.625	159.147	128.346
YDR197W	CBS2	122.441	146.544	102.063	119.79	125.946	117.782	149.2	132.997	135.05	98.9818
YDR198C	RKM2	99.2826	104.03	121.188	98.7446	110.328	78.3878	158.344	116.878	127.731	97.9781
YDR200C	VPS64	87.4194	91.0336	94.6035	106.962	110.376	87.9359	115.923	102.02	119.404	99.2469
YDR201W	SPC19	115.506	143.174	137.498	150.144	134.042	119.675	149.972	145.768	147.398	64.6299
YDR202C	RAV2	110.919	155.612	118.562	133.585	114.257	127.226	128.154	154.495	143.502	120.43
YDR204W	COQ4	108.312	164.917	201.558	199.6	134.663	143.369	155.546	163.904	156.05	142.416
YDR205W	MSC2	118.271	126.78	114.223	121.124	121.422	121.602	149.506	126.869	164.373	123.217
YDR206W	EBS1	137.14	123.418	116.191	124.316	166.026	157.616	159.64	159.03	173.904	144.017
YDR207C	UME6	88.475	62.1776	78.8871	83.0646	84.2048	59.7111	103.039	61.0101	89.6832	76.5466
YDR208W	MSS4	197.947	164.845	159.385	185.502	162.104	156.101	179.375	186.216	186.101	258.066
YDR210C-C	YDR210C-C	217.365	262.731	266.65	160.269	184.642	163.336	171.679	185.17	176.148	141.172
YDR210C-D	YDR210C-D	201.909	240.146	268.668	159.098	189.433	177.971	177.135	189.372	165.931	167.317
YDR210W	YDR210W	236.516	213.242	312.818	209.517	147.899	155.662	175.017	210.596	157.536	104.938
YDR210W-A	YDR210W-A	103.725	122.594	127.96	103.668	103.517	119.912	127.754	109.388	137.619	125.395
YDR210W-B	YDR210W-B	96.0084	101.13	99.1883	89.2302	103.126	102.959	107.946	99.2466	112.671	108.197
YDR211W	GCD6	176.753	113.882	103.3	120.835	150.32	158.068	158.698	131.295	152.365	163.209
YDR212W	TCP1	191.298	119.874	121.958	144.662	160.201	136.435	155.259	118.456	138.671	220.583
YDR213W	UPC2	143.882	92.6856	177.757	140.204	139.932	168.971	134.974	109.657	131.008	161.043
YDR214W	AHA1	293.064	145.617	330.686	225.509	165.481	309.766	280.048	161.232	179.756	301.199
YDR216W	ADR1	191.257	81.2096	83.6331	109.754	137.471	114.107	144.256	88.2679	126.138	173.62
YDR217C	RAD9	87.1805	70.5531	72.0514	86.315	112.16	114.611	102.501	91.8977	127.693	127.978
YDR218C	SPR28	45.3751	43.9679	43.3158	44.6182	114.181	54.7613	105.922	57.4912	93.1532	158.158
YDR219C	MFB1	143.883	121.527	112.738	115.867	116.171	110.131	138.128	140.585	134.878	119.828
YDR221W	GTB1	175.24	117.047	123.384	161.315	149.406	148.301	137.146	152.113	162.44	126.894
YDR222W	YDR222W	260.958	174.41	161.009	219.422	182.726	145.631	154.644	210.938	180.793	117.098
YDR223W	CRF1	83.7889	120.844	93.7133	147.26	129.307	118.665	149.465	157.28	124.729	131.43
YDR224C	HTB1	1227.35	1433.46	1422.88	1051.56	1000.17	624.822	1025.43	1027.77	953.517	543.797
YDR225W	HTA1	1383.39	1765.61	1492.35	1287.16	1519.87	620.813	1546.4	1224.56	1146.07	798.761
YDR226W	ADK1	382.316	339.288	285.494	325.998	225.827	330.081	220.245	368.946	163.803	235.318
YDR227W	SIR4	94.4773	75.1657	79.4448	92.6731	109.917	97.1657	112.589	94.4541	124.966	129.891
YDR228C	PCF11	178.084	144.354	114.835	128.688	152.237	128.358	159.778	177.653	159.633	180.291
YDR229W	IVY1	148.692	158.028	155.555	171.01	128.144	135.347	148.104	152.403	157.162	118.724
YDR231C	COX20	144.333	153.129	152.164	202.353	123.03	119.768	138.809	125.34	184.633	164.977
YDR232W	HEM1	204.45	173.322	221.851	217.265	212.604	211.552	222.326	213.707	204.701	238.555
YDR233C	RTN1	615.513	454.24	363.102	430.946	315.024	403.593	451.267	415.248	428.536	374.368
YDR234W	LYS4	125.129	163.645	181.588	224.906	214.636	432.154	235.982	237.631	254.367	234.169
YDR235W	PRP42	149.582	235.434	187.15	149.732	199.014	208.333	189.72	194.079	168.712	160.995
YDR236C	FMN1	162.605	622.936	406.36	244.23	300.428	268.654	348.932	405.633	295.661	195.2
YDR237W	MRPL7	139.253	129.124	113.847	129.976	160.53	138.834	141.99	158.473	141.576	105.793
YDR238C	SEC26	213.26	160.038	149.768	178.74	191.143	173.092	197.162	189.03	200.367	178.816
YDR239C	YDR239C	89.2089	78.3707	87.3459	81.6004	118.901	100.898	114.486	101.286	116.282	114.067
YDR240C	SNU56	115.203	100.334	92.2019	92.0934	108.598	104.072	127.396	104.905	118.931	136.236
YDR242W	AMD2	125.25	276.593	303.77	258.553	304.325	387.581	263.28	362.893	323.125	292.256
YDR243C	PRP28	109.79	203.268	211.622	184.484	258.892	205.207	176.812	265.029	222.412	157.982
YDR244W	PEX5	114.306	185.329	159.618	180.021	191.712	158.917	155.761	212.535	179.362	178.379
YDR245W	MNN10	210.483	152.577	141.635	156.004	175.227	204.425	176.026	168.466	152.906	202.483
YDR246W	TRS23	184.938	177.58	179.111	208.342	156.822	194.122	154.622	132.554	144.269	215.596
YDR246W-A	YDR246W-A	155.712	129.499	192.37	259.314	392.069	148.396	142.417	183.037	153.081	382.09
YDR247W	VHS1	131.542	178.937	173.434	191.601	140.997	162.067	169.702	156.675	175.165	133.254
YDR248C	YDR248C	152.878	274.044	178.469	200.627	126.199	112.067	133.633	215.899	155.311	115.538
YDR249C	YDR249C	121.102	167.198	109.539	130.092	150.393	156.902	167.584	146.59	153.712	105.557
YDR251W	PAM1	184.21	211.66	205.068	187.1	182.477	164.365	190.315	209.292	152.938	165.685
YDR252W	BTT1	139.806	172.471	186.427	129.751	130.16	101.179	172.472	145.607	137.978	94.097
YDR253C	MET32	140.295	147.434	117.509	106.911	171.981	141.049	133.732	140.055	182.824	146.422
YDR254W	CHL4	189.967	221.039	158.725	152.854	180.946	153.532	186.588	208.096	192.393	231.854
YDR255C	RMD5	164.292	203.327	173.042	160.587	299.993	169.591	165.846	162.606	178.237	149.035
YDR256C	CTA1	141.836	105.521	127.445	122.842	165.737	131.604	112.785	152.397	130.544	100.27
YDR257C	SET7	133.402	172.185	145.22	166.27	173.254	180.93	179.94	187.718	241.143	183.939
YDR258C	HSP78	179.469	641.794	736.897	627.751	607.051	788.53	704.944	618.775	670.274	494.85
YDR259C	YAP6	81.423	89.2834	102.898	85.9567	113.669	111.222	120.389	92.9123	89.8964	78.4743
YDR260C	SWM1	188.832	174.514	218.177	247.37	199.217	245.548	226.591	204.465	209.004	211.717
YDR261C	EXG2	159.593	152.587	175.547	141.674	119.311	126.918	152.708	150.139	117.598	129.42
YDR261C-C	YDR261C-C	271.996	319.063	313.732	189.857	193.194	190.517	191.362	228.324	194.149	158.952
YDR261C-D	YDR261C-D	389.33	451.368	474.073	236.039	324.367	272.949	274.862	303.343	254.003	226.521
YDR261W-A	YDR261W-A	88.0162	90.6362	81.0567	89.2848	81.5509	108.104	91.974	117.584	88.2404	80.7434
YDR261W-B	YDR261W-B	88.4656	86.8695	86.7745	81.8237	87.4721	94.0662	95.6264	101.594	89.7458	85.8261
YDR262W	YDR262W	214.564	254.53	212.85	225.902	195.538	250.487	231.76	260.334	301.971	198.172
YDR263C	DIN7	100.758	105.089	119.165	110.904	113.41	71.0674	151.141	109.739	160.411	108.991
YDR264C	AKR1	156.918	162.148	181.405	199.898	150.562	260.975	192.933	197.403	198.121	230.118
YDR265W	PEX10	150.586	147.632	174.533	136.972	183.718	162.759	155.589	165.153	256.027	131.653
YDR266C	YDR266C	168.035	146.357	155.8	143.915	134.834	126.717	141.274	153.864	145.176	160.533
YDR267C	CIA1	116.034	91.5033	118.117	122.678	82.1383	107.379	120.68	104.254	115.451	94.7613
YDR268W	MSW1	144.564	98.0056	101.159	111.289	120.664	133.744	130.987	105.46	120.178	110.493
YDR270W	CCC2	114.253	104.136	113.04	108.07	180.747	126.717	133.99	117.225	168.38	116.041
YDR272W	GLO2	152.568	166.193	155.982	209.126	245.152	153.771	149.8	175.178	195.721	134.009
YDR273W	DON1	94.1345	83.6374	73.7196	133.509	108.292	77.2882	132.553	159.912	123.248	103.789
YDR275W	BSC2	327.632	174.176	211.406	250.41	196.54	268.865	255.978	199.284	167.427	232.774
YDR277C	MTH1	111.928	100.062	96.2812	135.51	88.3187	121.074	131.46	102.145	86.3844	68.4715
YDR279W	RNH202	108.905	82.6324	82.0295	79.942	214.439	95.1128	111.812	99.7205	85.3951	149.494
YDR280W	RRP45	186.575	117.403	165.435	143.568	143.229	216.987	251.37	167.138	203.895	229.107
YDR281C	PHM6	107.238	78.7719	84.689	75.5311	304.226	46.688	130.745	79.7378	78.1227	47.9471
YDR282C	YDR282C	72.0602	79.2583	83.8567	82.8428	93.4835	85.5791	127.009	116.394	100.776	81.8601
YDR283C	GCN2	106.443	130.928	116.308	105.615	142.274	108.567	137.779	137.353	155.604	161.953
YDR284C	DPP1	205.539	213.132	203.768	215.461	241.691	167.965	231.44	284.652	186.019	153.003
YDR285W	ZIP1	70.0182	75.8911	69.6354	65.2664	69.1765	45.707	85.1214	96.3853	85.1005	69.188
YDR286C	YDR286C	120.559	145.822	141.941	125.189	134.225	95.0957	181.319	119.119	156.085	75.6579
YDR287W	YDR287W	89.7632	109.106	103.123	117.247	139.415	98.7666	108.714	139.312	108.051	96.6828
YDR288W	NSE3	161.194	160.817	182.655	127.682	157.815	161.786	157.884	157.388	132.392	177.756
YDR289C	RTT103	108.072	114.377	110.683	97.8482	106.25	125.727	125.819	120.813	110.162	120.223
YDR291W	HRQ1	103.593	86.5717	97.7514	81.4002	120.911	77.4899	116.171	108.785	87.2747	80.0859
YDR292C	SRP101	135.348	120.009	128.491	115.358	117.536	111.468	156.878	138.532	136.891	121.012
YDR293C	SSD1	210.545	293.124	296.279	324.584	261.23	263.816	250.397	332.135	250.817	243.624
YDR294C	DPL1	142.237	145.313	183.067	158.75	202.904	130.609	153.694	172.847	149.82	177.845
YDR295C	HDA2	109.766	101.778	103.158	91.8386	146.819	83.4192	110.874	108.73	140.537	125.784
YDR296W	MHR1	200.673	168.374	178.719	230.577	146.232	165.987	260.373	162.287	170.576	138.577
YDR297W	SUR2	158.031	94.8139	115.743	133.566	192.227	141.96	128.834	93.772	103.745	153.379
YDR298C	ATP5	193.933	133.374	174.732	164.208	121.025	144.843	174.563	165.68	142.845	148.275
YDR299W	BFR2	159.937	60.2975	77.1664	80.3162	127.866	88.1237	120.948	80.3158	111.399	120.52
YDR300C	PRO1	140.731	97.9788	118.286	126	135.335	173.515	133.026	135.41	146.466	144.069
YDR301W	CFT1	115.984	136.755	149.944	130.098	176.059	139.579	168.49	162.797	170.322	147.817
YDR302W	GPI11	122.615	101.299	101.241	81.8929	102.624	85.955	114.932	128.868	115.663	98.745
YDR303C	RSC3	150.3	111.437	94.8303	102.246	151.518	104.669	140.631	130.566	145.277	121.776
YDR304C	CPR5	168.213	203.077	190.326	217.131	150.964	209.755	141.359	186.705	173.573	141.907
YDR305C	HNT2	251.357	296.451	232.202	277.93	201.26	191.401	227.547	267.535	225.582	187.489
YDR306C	YDR306C	112.902	123.363	118.405	133.241	131.248	142.831	140.564	128.132	186.851	182.525
YDR307W	YDR307W	113.932	107.118	115.288	100.029	104.627	104.933	124.487	110.439	100.441	110.229
YDR308C	SRB7	184.605	188.807	190.399	162.144	147.783	161.179	181.599	176.757	133.63	95.1134
YDR309C	GIC2	365.59	332.844	401.815	383.894	232.967	266.955	153.91	230.016	206.12	130.939
YDR310C	SUM1	161.305	117.359	114.667	156.598	150.599	144.503	152.764	135.851	119.438	138.564
YDR311W	TFB1	118.812	143.095	142.136	137.256	157.537	132.584	138.702	155.285	145.443	146.282
YDR312W	SSF2	100.29	79.2357	85.7974	95.9962	108.736	97.9828	155.702	101.851	174.02	113.34
YDR313C	PIB1	152.298	140.186	202.022	178.743	134.693	173.959	172.54	154.862	166.625	161.044
YDR314C	RAD34	115.455	123.5	142.726	98.9623	131.402	132.256	143.442	143.223	172.194	141.735
YDR315C	IPK1	122.479	114.058	95.0976	104.869	89.2839	114.472	133.067	133.582	101.444	104.773
YDR316W	OMS1	103.757	95.5867	90.6168	86.6652	102.824	96.4798	124.769	117.276	114.409	123.008
YDR316W-A	YDR316W-A	232.859	279.418	312.91	197.26	208.276	191.856	193.688	227.1	207.955	167.955
YDR316W-B	YDR316W-B	223.27	264.193	302.967	170.171	211.616	189.204	195.507	206.47	186.82	162.466
YDR317W	HIM1	97.6783	103.665	106.493	89.4893	121.477	112.838	121.532	99.1589	110.121	98.9732
YDR318W	MCM21	219.42	213.004	151.411	170.359	188.963	159.973	206.365	239.426	219.886	127.656
YDR319C	YDR319C	186.495	198.597	172.341	167.917	177.525	186.466	208.823	173.527	212.847	122.122
YDR320C	SWA2	109.944	101.469	115.038	108.74	116.41	115.304	126.519	122.585	117.109	100.338
YDR320C-A	DAD4	241.299	145.687	193.23	168.043	274.773	165.727	138.364	88.3717	138.745	110.892
YDR321W	ASP1	144.948	93.4858	78.1821	104.578	135.335	132.526	137.93	126.998	137.844	129.931
YDR322C-A	TIM11	238.025	276.987	263.629	207.409	399.765	197.283	214.796	231.987	278.132	309.66
YDR322W	MRPL35	131.878	152.174	138.516	132.146	176.97	109.776	160.256	149.762	149.412	142.297
YDR323C	PEP7	100.75	99.777	123.725	101.568	107.808	92.5413	129.813	105.36	108.524	112.85
YDR324C	UTP4	152.426	75.5424	74.9484	82.6669	101.726	99.5995	136.148	92.463	106.176	95.002
YDR325W	YCG1	105.962	72.3988	69.4657	86.3991	130.848	80.8504	111.738	95.439	100.531	112.391
YDR326C	YSP2	136.57	138.285	132.21	130.962	161.216	133.113	166.501	156.281	174.055	191.348
YDR328C	SKP1	129.825	139.538	197.606	207.416	129.881	121.03	170.469	195.884	170.151	104.279
YDR329C	PEX3	102.636	119.326	124.133	142.514	120.919	134.063	173.048	157.503	117.405	130.442
YDR330W	UBX5	94.3439	131.24	125.278	158.061	139.364	97.168	155.479	140.614	151.971	196.623
YDR331W	GPI8	162.766	141.064	138.459	139.21	154.362	135.657	156.713	164.545	152.121	168.565
YDR332W	IRC3	106.517	108.822	112.47	86.4573	152.263	123.527	164.671	122.097	125.416	112.652
YDR333C	YDR333C	160.987	137.759	126.942	135.42	200.241	160.093	182.079	159.371	188.8	136.672
YDR334W	SWR1	156.75	125.021	121.499	144.363	144.643	137.723	163.848	140.139	147.297	155.068
YDR335W	MSN5	148.86	139.361	142.673	143.563	156.513	148.521	164.283	159.176	138.204	141.215
YDR336W	YDR336W	166.609	145.211	150.848	147.032	134.687	127.613	148.802	139.354	141.402	132.225
YDR337W	MRPS28	144.067	135.176	140.433	158.495	128.796	132.938	171.533	172.556	159.623	126.502
YDR338C	YDR338C	96.1509	102.398	136.289	126.078	133.341	111.108	144.547	139.947	114.314	124.925
YDR339C	FCF1	197.781	136.624	113.995	148.014	133.272	156.679	177.477	134.936	147.113	138.817
YDR341C	YDR341C	186.421	297.44	187.128	309.141	359.923	459.789	211	404.371	274.656	252.691
YDR342C	HXT7	159.271	141.32	94.3722	109.045	159.774	131.624	188.706	133.45	115.888	89.1065
YDR343C	HXT6	196.334	146.453	114.882	118.602	189.461	137.865	229.615	143.159	145.543	116.51
YDR345C	HXT3	389.933	146.217	544.174	366.419	217.826	452.04	476.156	254.1	316.52	745.054
YDR346C	SVF1	220.573	123.397	118.439	165.492	162.308	205.933	194.357	161.77	194.255	163.495
YDR347W	MRP1	218.168	173.273	164.72	200.416	182.022	220.076	250.372	206.075	223.63	257.209
YDR348C	YDR348C	159.667	105.258	120.367	146.419	138.747	175.359	132.752	141.655	147.053	116.728
YDR349C	YPS7	150.12	123.857	147.466	164.121	192.989	186.584	202.646	154.826	188.463	243.805
YDR350C	TCM10	129.609	151.321	139.307	124.133	148.972	144.663	171.236	171.522	187.051	155.608
YDR351W	SBE2	150.22	153.977	117.285	150.789	191.475	147.513	155.867	165.457	203.394	184.195
YDR352W	YDR352W	215.727	230.593	264.883	267.495	178.797	200.087	225.387	260.666	212.172	252.035
YDR353W	TRR1	335.95	493.648	581.877	540.471	465.039	478.317	323.554	533.063	368.33	263.048
YDR354W	TRP4	137.085	461.295	530.212	432.444	493.579	507.396	355.132	470.242	352.24	248.949
YDR356W	SPC110	102.724	79.1722	87.0366	77.2611	126.952	95.196	113.354	98.3588	112.753	127.633
YDR357C	YDR357C	287.161	227.966	188.664	193.267	222.579	230.413	243.322	206.186	243.799	231.697
YDR358W	GGA1	127.415	191.175	177.999	201.87	197.975	111.224	191.359	184.449	180.054	136.672
YDR359C	VID21	146.027	136.178	144.267	167.38	173.089	145.352	183.934	150.352	194.816	189.135
YDR361C	BCP1	186.144	109.376	102.906	120.167	197.819	125.045	180.237	104.845	152.843	117.522
YDR362C	TFC6	123.356	107.499	111.989	113.047	156.426	99.1863	134.159	120.684	139.32	148.248
YDR363W	ESC2	98.5475	98.8482	105.602	102.34	110.877	101.682	106.596	110.886	117.86	94.2146
YDR363W-A	SEM1	364.586	253.7	259.683	230.187	171.814	264.282	250.187	137.721	283.411	264.783
YDR364C	CDC40	141.898	109.774	110.611	117.904	131.106	144.125	113.014	133.67	119.831	139.185
YDR365C	ESF1	288.593	140.971	272.568	94.7432	147.811	120.421	142.013	110.086	158.623	107.272
YDR365W-A	YDR365W-A	258.286	297.251	322.574	189.919	185.564	179.735	188.378	212.223	186.559	160.858
YDR365W-B	YDR365W-B	240.918	268.866	278.775	152.974	207.032	162.257	164.261	179.127	156.745	140.558
YDR366C	YDR366C	188.566	253.045	177.066	76.6612	159.33	108.333	147.516	159.857	140.14	120.536
YDR367W	YDR367W	102.899	134.332	120.057	99.562	131.162	85.0708	140.669	141.822	138.657	127.359
YDR368W	YPR1	130.528	174.048	165.411	179.645	177.176	92.3	169.993	163.675	210.103	236.702
YDR369C	XRS2	72.0525	80.5662	96.3279	83.7423	112.612	74.7705	103.279	95.2371	100.887	87.3762
YDR370C	YDR370C	126.816	134.968	109.927	118.404	180.606	118.284	168.27	170.654	151.601	206.826
YDR371W	CTS2	110.287	209.086	153.406	143.795	199.936	135.109	204.018	201.23	207.351	157.152
YDR372C	VPS74	175.69	259.405	228.259	220.065	268.911	199.284	256.097	238.33	229.667	194.26
YDR373W	FRQ1	136.317	184.43	140.338	135.964	153.63	135.887	176.015	168.244	194.984	162.01
YDR374C	YDR374C	44.0344	64.6023	54.7594	40.7139	90.8712	47.8965	96.3939	56.5414	70.4857	125.434
YDR374W-A	YDR374W-A	155.459	184.903	175.604	165.92	158.933	141.767	162.595	183.457	171.85	192.231
YDR375C	BCS1	134.312	166.291	123.884	179.06	162.726	158.086	219.866	178.248	192.779	199.566
YDR376W	ARH1	104.302	130.89	103.393	126.649	151.382	107.003	196.078	134.394	124.174	135.754
YDR377W	ATP17	326.713	283.043	265.895	268.286	160.714	240.322	280.332	305.159	263.502	206.303
YDR378C	LSM6	411.181	318.883	293.956	303.39	244.834	224.1	329.46	317.244	302.362	294.514
YDR379C-A	YDR379C-A	165.747	386.308	273.978	198.956	248.71	117.584	244.771	253.001	291.57	147.492
YDR379W	RGA2	112.667	150.206	136.39	152.459	163.763	144.991	162.022	146.484	154.163	139.97
YDR380W	ARO10	161.007	858.051	214.796	122.332	271.981	87.4164	211.483	313.332	152.045	115.655
YDR381C-A	YDR381C-A	414.482	640.932	464.867	369.847	751.841	412.075	507.029	658.14	624.227	460.151
YDR381W	YRA1	1155.06	1036.39	885.644	695.49	963.817	875.048	1238.65	1052.05	1233.32	1071.38
YDR382W	RPP2B	1013.07	712.57	466.888	701.329	497.312	447.334	359.943	480.213	428.524	464.234
YDR383C	NKP1	434.646	386.211	263.193	274.762	292.632	295.704	267.167	298.167	288.346	323.69
YDR384C	ATO3	204.86	100.701	96.1459	91.332	131.07	125.39	120.06	117.617	125.936	122.774
YDR385W	EFT2	721.72	496.266	500.714	531.165	409.694	459.198	345.727	436.595	422.515	400.215
YDR386W	MUS81	107.05	94.7287	95.6307	91.968	140.986	92.5092	115.857	108.279	105.917	81.5777
YDR387C	YDR387C	109.113	129.753	129.629	154.503	104.929	121.767	133.634	144.9	134.355	201.461
YDR388W	RVS167	159.64	180.062	215.47	244.878	217.783	163.489	183.75	183.769	178.531	152.313
YDR389W	SAC7	179.382	148.226	152.942	159.639	139.631	204.354	172.336	175.302	174.511	142.458
YDR390C	UBA2	131.475	108.636	89.1049	110.554	172.605	132.809	136.221	114.619	146.602	118.945
YDR391C	YDR391C	112.557	156.508	133.519	135.971	117.931	138.629	108.655	126.467	151.354	138.951
YDR392W	SPT3	106.185	107.817	121.826	120.211	118.922	99.6196	121.81	118.823	112.511	127.556
YDR393W	SHE9	213.149	176.149	146.433	161.783	152.09	186.835	165.842	191.815	171.046	155.868
YDR394W	RPT3	213.761	137.187	160.372	191.783	139.851	194.036	168.326	177.239	159.85	169.585
YDR395W	SXM1	176.859	112.063	93.9084	113.383	172.677	136.55	148.938	121.54	143.155	191.704
YDR397C	NCB2	218.035	149.387	158.721	162.299	150.542	171.438	173.596	164.455	168.615	200.022
YDR398W	UTP5	164.324	68.5964	76.1432	104.384	109.368	105.723	102.057	94.4998	119.895	103.618
YDR399W	HPT1	401.954	134.237	138.648	146.854	119.976	224.374	149.614	121.876	194.08	163.511
YDR400W	URH1	100.27	78.1473	93.7961	83.7141	179.63	80.1296	117.127	112.03	85.0349	150.888
YDR402C	DIT2	49.528	53.1273	69.5863	46.7452	83.4482	46.4353	92.2112	73.8224	68.9378	95.3471
YDR403W	DIT1	58.9398	68.3436	93.5139	59.2646	82.747	51.4458	105.056	90.1591	122.786	56.823
YDR404C	RPB7	231.983	217.866	194.871	192.225	172.499	181.723	206.106	195.504	242.404	212.745
YDR405W	MRP20	196.709	219.485	204.462	208.262	138.618	161.926	167.167	171.789	276.747	156.178
YDR406W	PDR15	110.516	126.115	140.426	131.25	119.566	132.51	154.173	130.061	137.959	157.346
YDR407C	TRS120	127.532	123.405	112.476	117.051	148.391	136.632	150.849	149.114	160.392	142.301
YDR408C	ADE8	254.477	287.291	317.709	414.244	225.035	360.386	250.054	347.024	292.495	205.09
YDR409W	SIZ1	124.108	122.614	105.666	128.299	127.314	127.144	145.916	129.017	132.714	192.383
YDR410C	STE14	256.477	280.27	201.709	172.253	259.019	177.934	230.49	229.112	184.204	154.462
YDR411C	DFM1	195.816	204.968	206.542	224.55	167.033	157.369	201.122	174.873	170.423	203.856
YDR412W	RRP17	145.475	106.99	73.4352	126.727	132.268	103.93	132.146	115.475	119.087	220.595
YDR414C	ERD1	137.349	135.659	100.314	121.159	105.959	161.473	165.548	155.672	150.948	125.058
YDR415C	YDR415C	152.087	173.42	141.049	151.251	114.477	171.907	152.976	203.507	141.089	123.529
YDR416W	SYF1	183.788	151.377	117.796	129.507	124.887	121.126	114.068	138.745	100.987	116.616
YDR418W	RPL12B	1023.35	861.704	637.304	675.197	483.953	478.033	455.729	676.544	443.619	421.146
YDR419W	RAD30	85.9382	86.4557	76.7777	88.2527	131.266	85.8564	115.058	94.3809	98.1276	147.897
YDR420W	HKR1	130.706	129.679	123.934	145.043	133.348	121.42	113.706	150.006	138.485	160.362
YDR421W	ARO80	85.0611	109.628	108.878	113.156	113.542	97.1091	110.58	109.574	118.269	120.904
YDR422C	SIP1	147.021	161.073	150.455	168.922	200.399	139.777	189.464	177.019	194.094	183.541
YDR423C	CAD1	178.51	198.304	187.901	202.308	168.034	197.831	163.568	222.236	150.403	252.933
YDR424C	DYN2	336.625	348.442	316.607	249.004	184.352	261.784	243.283	247.645	231.968	247.323
YDR425W	SNX41	105.076	395.762	216.01	132.38	191.268	194.331	231.939	262.332	167.729	143.117
YDR427W	RPN9	251.662	204.851	166.724	146.744	193.722	183.108	194.426	190.396	192.162	173.25
YDR428C	YDR428C	212.29	172.258	199.883	134.548	156.636	143.197	170.331	140.56	166.128	124.294
YDR429C	TIF35	259.7	188.414	150.631	202.487	163.926	173.084	167.707	176.388	170.211	190.36
YDR430C	CYM1	132.542	143.178	139.111	146.497	103.327	94.9589	140.518	142.943	127.971	129.653
YDR432W	NPL3	462.317	328.424	319.413	369.059	210.613	321.52	302.771	330.138	369.034	420.443
YDR434W	GPI17	106.423	112.429	116.887	110.475	170.066	111.156	132.038	146.455	131.758	161.294
YDR435C	PPM1	81.3144	93.4869	127.374	107.928	184.984	101.591	117.479	98.8078	125.778	97.2214
YDR436W	PPZ2	88.8831	99.2284	124.361	140.276	107.843	103.513	115.334	118.231	140.745	91.1287
YDR437W	GPI19	125.269	121.711	158.317	122.173	79.0134	121.503	147.553	108.714	292.705	91.0395
YDR438W	THI74	176.047	153.222	171.107	143.345	111.821	178.515	136.325	142.896	157.08	141.238
YDR439W	LRS4	124.993	108.498	113.978	114.458	124.41	127.416	137.278	117.09	148.494	201.208
YDR440W	DOT1	91.9917	62.8215	99.6198	68.8404	116.537	103.29	117.517	77.379	94.2986	94.0929
YDR441C	APT2	164.944	98.5595	129.348	99.9956	198.571	142.399	183.745	132.915	217.586	159.503
YDR443C	SSN2	82.4067	83.2101	82.1867	97.6756	90.5675	91.2906	106.767	106.423	100.955	83.1715
YDR444W	YDR444W	124.856	79.9685	89.4977	98.8057	95.6546	88.5618	117.82	95.5364	129.639	106.457
YDR446W	ECM11	150.237	138.14	125.898	93.2814	140.053	103.452	105.709	146.635	102.755	85.063
YDR447C	RPS17B	743.575	552.351	347.543	417.597	464.947	385.701	302.911	381.59	375.35	276.772
YDR448W	ADA2	200.211	144.307	147.641	139.98	144.688	121.65	132.458	102.211	131.881	138.057
YDR449C	UTP6	188.3	105.368	86.9151	95.0198	139.994	115.589	133.087	112.536	136.377	93.8937
YDR450W	RPS18A	745.198	636.219	403.942	442.447	374.476	402.282	343.795	504.274	381.174	274.44
YDR451C	YHP1	341.45	316.838	316.027	208.678	246.387	183.543	217.951	292.021	214.979	131.94
YDR452W	PPN1	156.882	201.698	165.05	194.248	242.031	179.065	165.106	191.918	148	144.089
YDR453C	TSA2	153.732	210.731	201.443	187.586	196.442	117.487	162.588	184.32	245.019	165.118
YDR454C	GUK1	204.489	173.771	172.698	155.763	153.644	149.959	214.268	180.378	161.923	289.763
YDR456W	NHX1	129.348	127.271	134.623	128.072	175.652	159.251	169.558	141.905	144.544	136.075
YDR457W	TOM1	131.178	120.76	121.609	122.514	143.429	124.701	134.324	131.127	153.427	142.685
YDR458C	HEH2	131.193	133.704	121.768	120.84	148.454	123.898	118.341	116.199	107.069	129.649
YDR459C	PFA5	140.527	143.075	140.876	138.321	156.301	113.884	150.059	141.19	120.797	168.209
YDR460W	TFB3	253.881	373.76	178.415	162.933	124.169	168.722	136.142	156.764	123.413	120.094
YDR461C-A	YDR461C-A	444.521	1024.02	368.701	225.748	131.352	188.485	156.203	379.82	169.218	87.0193
YDR462W	MRPL28	219.23	221.226	208.181	281.972	159.223	232.196	191.389	299.707	239.763	161.059
YDR463W	STP1	170.887	202.833	195.133	239.98	255.215	229.971	212.842	253.968	244.146	174.813
YDR464W	SPP41	101.541	69.9745	85.9349	80.9337	104.85	98.0417	138.29	95.7542	126.959	128.676
YDR465C	RMT2	102.619	54.8066	51.7897	79.7557	89.8384	91.0267	100.938	87.4615	150.205	109.703
YDR466W	PKH3	157.519	160.192	124.941	160.023	160.058	126.267	160.461	149.74	185.544	135.276
YDR468C	TLG1	221.209	228.443	178.549	199.315	169.909	215.03	246.185	214.732	176.091	138.906
YDR469W	SDC1	173.944	176.056	157.272	150.049	148.792	198.861	116.201	154.57	191.317	173.02
YDR470C	UGO1	140.064	140.663	114.705	125.384	129.787	133.246	134.811	153.965	153.691	137.14
YDR471W	RPL27B	831.65	758.566	512.881	514.935	497.099	399.408	331.716	556.686	385.085	343.102
YDR472W	TRS31	196.236	182.057	181.289	163.955	157.68	175.49	179.244	173.916	147.143	163.379
YDR473C	PRP3	96.7882	104.853	98.3304	106.223	102.236	139.925	108.322	123.14	88.5668	134.734
YDR475C	JIP4	172.457	226.202	233.053	213.468	193.879	169.842	132.442	213.708	160.447	166.181
YDR476C	YDR476C	225.28	306.664	453.845	575.856	217.955	391.368	216.425	423.516	256.654	251.285
YDR477W	SNF1	162.262	182.335	156.243	209.857	170.396	192.681	199.169	216.195	184.864	139.915
YDR478W	SNM1	159.762	182.523	154.463	178.591	145.142	151.91	145.414	197.584	175.994	120.992
YDR479C	PEX29	189.532	198.927	187.151	202.063	186.153	190.017	173.596	235.575	215.223	215.455
YDR480W	DIG2	113.705	156.512	154.03	136.098	201.385	152.924	148.672	172.144	161.517	124.855
YDR481C	PHO8	125.113	330.017	349.721	302.238	246.142	356.716	253.446	369.651	288.885	270.514
YDR482C	CWC21	94.1438	228.53	288.082	276.267	160.898	180.63	190.598	151.58	162.442	160.157
YDR483W	KRE2	178.312	201.229	189.122	179.416	148.563	169.546	154.104	154.656	150.931	150.693
YDR484W	VPS52	107.157	131.538	92.4672	94.9477	100.79	103.038	176.448	109.482	129.467	142.096
YDR485C	VPS72	115.227	106.165	111.28	101.164	110.195	113.157	135.359	135.827	105.67	95.3842
YDR486C	VPS60	188.935	251.686	201.356	246.5	250.146	248.723	200.897	255.543	194.494	160.126
YDR487C	RIB3	177.776	346.514	273.049	500.309	335.271	377.357	290.026	425.359	415.396	284.57
YDR488C	PAC11	64.5982	44.2596	83.0411	77.5483	71.1153	55.0101	74.7452	56.7518	64.6226	96.0109
YDR489W	SLD5	165.726	149.221	124.413	148.817	207.074	147.378	163.748	172.461	180.851	139.826
YDR490C	PKH1	134.357	129.566	155.789	192.738	150.238	119.879	137.942	162.333	156.788	130.396
YDR492W	IZH1	142.316	105.268	96.0644	125.065	103.08	230.523	130.389	126.713	103.836	265.093
YDR493W	FMP36	197.353	245.029	246.986	235.54	192.944	222.946	236.963	211.129	230.802	260.851
YDR494W	RSM28	143.618	162.13	132.896	151.983	193.68	118.008	154.431	169.102	162.619	165.728
YDR495C	VPS3	91.3368	94.9746	92.2447	75.1159	118.071	73.2913	134.459	88.2228	130.489	127.63
YDR496C	PUF6	179.456	74.3437	74.2268	81.6547	103.368	96.6398	102.205	83.4222	107.365	99.0886
YDR497C	ITR1	811.785	162.523	307.544	205.693	273.681	281.269	243.359	219.409	232.148	385.973
YDR498C	SEC20	268.877	145.627	152.333	175.326	265.336	167.488	174.22	160.559	155.425	178.005
YDR499W	LCD1	171.459	136.032	112.33	116.741	127.246	109.473	151.835	130.265	136.241	129.874
YDR500C	RPL37B	749.471	667.44	518.03	491.141	547.233	369.08	363.998	560.601	432.187	345.623
YDR501W	PLM2	94.4324	70.4196	81.7781	58.769	70.823	83.4442	90.6503	74.8342	97.1401	67.1173
YDR502C	SAM2	306.619	163.503	112.28	94.3009	91.1856	165.271	81.6536	136.691	130.407	132.854
YDR503C	LPP1	154.755	124.465	114.233	105.344	129.113	170.795	125.413	154.168	167.474	132.449
YDR504C	SPG3	196.721	159.519	134.318	96.9415	140.741	138.283	119.067	159.182	118.192	154.833
YDR505C	PSP1	158.658	190.48	168.806	175.898	127.032	196.347	155.196	212.769	148.064	133.855
YDR506C	YDR506C	104.198	79.1601	119.655	127.051	100.443	109.806	135.342	108.233	107.885	145.816
YDR507C	GIN4	154.41	82.5101	85.9427	83.7336	85.8801	109.823	110.659	110.387	112.686	109.542
YDR508C	GNP1	587.789	358.354	352.646	408.881	438.363	276.05	319.364	413.981	426.816	293.323
YDR510W	SMT3	388.699	285.371	268.517	338.933	204.948	304.35	291.964	251.526	284.772	272.137
YDR511W	ACN9	273.265	320.792	299.322	318.87	223.455	341.16	193.009	300.049	239.265	166.75
YDR512C	EMI1	227.706	282.069	281.124	267.912	164.449	184.013	229.668	226.071	209.741	198.141
YDR513W	GRX2	285.812	407.156	329.492	307.175	240.399	182.228	256.533	352.46	224.791	185.131
YDR514C	YDR514C	136.553	129.809	112.504	127.687	139.86	116.163	122.21	131.277	127.148	108.026
YDR515W	SLF1	113.331	76.8137	78.0176	69.1127	87.5298	78.4597	110.954	74.9614	94.7522	81.6739
YDR516C	EMI2	123.165	170.389	221.45	193.554	123.776	146.051	194.045	160.474	139.2	122.688
YDR517W	GRH1	178.517	122.224	191.923	205.219	92.6234	178.799	151.574	165.309	128.023	172.226
YDR518W	EUG1	104.792	125.448	128.56	115.979	136.316	110.277	131.379	165.964	148.091	117.295
YDR519W	FPR2	193.621	160.529	171.127	176.76	127.284	145.941	153.153	170.053	163.494	272.106
YDR520C	YDR520C	126.195	104.3	95.323	101.022	149	135.974	140.813	128.518	153.74	171.426
YDR522C	SPS2	64.1262	62.4771	68.8975	72.8801	84.931	75.3712	111.138	92.7539	99.5725	85.9671
YDR523C	SPS1	47.3789	52.9586	53.9648	68.027	71.3505	63.9227	77.551	98.8103	67.1959	94.6966
YDR524C	AGE1	191.272	166.192	138.402	168.537	136.145	203.59	170.625	194.553	201.077	254.88
YDR524C-B	YDR524C-B	3082.66	3033.37	2790.34	3010.03	2603.06	2398.83	2688.23	2232.7	2465.59	2119.29
YDR525W-A	SNA2	351.337	462.956	439.876	635.895	428.936	531.739	431.175	491.148	462.15	581.96
YDR527W	RBA50	269.904	216.94	193.254	291.758	206.966	257.065	227.217	284.783	281.683	238.702
YDR528W	HLR1	271.007	148.227	174.577	140.953	153.983	158.984	210.951	187.424	181.814	139.8
YDR529C	QCR7	305.703	296.438	343.064	352.527	227.786	320.217	237.887	337.715	310.127	260.414
YDR530C	APA2	139.785	164.488	152.669	289.96	122.565	264.689	219.881	211.449	196.445	152.218
YDR531W	YDR531W	133.955	260.366	197.7	206.826	237.399	336.284	225.227	328.338	258.228	229.839
YDR532C	YDR532C	109.978	133.505	98.2002	108.775	133.408	149.531	151.89	136.604	147.827	103.651
YDR533C	HSP31	194.787	490.056	287.572	191.488	285.41	184.517	305.896	228.203	230.512	188.92
YDR534C	FIT1	47.4763	49.0481	77.4561	88.2493	81.1555	63.9152	82.2315	67.6469	85.5609	63.8039
YDR536W	STL1	88.6083	76.4072	101.241	98.6965	138.495	105.009	135.496	109.486	136.028	121.763
YDR538W	PAD1	107.705	102.557	107.665	104.994	102.688	113.759	148.823	158.208	117.018	104.852
YDR539W	YDR539W	91.1371	96.0135	151.718	105.013	147.04	109.694	148.48	132.028	134.795	155.119
YDR540C	IRC4	62.5259	94.0844	74.1629	64.4702	82.4094	164.69	160.824	119.67	137.641	198.791
YDR541C	YDR541C	84.057	92.2278	109.534	97.4793	127.297	114.641	114.767	114.451	115.339	168.703
YDR542W	PAU10	31.8753	30.6457	43.7112	51.0838	50.9658	38.678	68.5299	62.4709	52.9378	65.7448
YDR545W	YRF1-1	159.402	96.6083	192.564	159.938	187.59	164.444	208.372	153.187	195.04	210.054
YEL001C	YEL001C	193.911	183.46	157.584	181.799	155.684	181.541	243.553	180.805	183.506	156.601
YEL002C	WBP1	197.411	165.152	163.903	153.238	198.945	155.507	173.097	166.426	171.565	167.974
YEL003W	GIM4	269.211	208.017	133.4	147.45	187.746	155.645	158.055	156.397	173.273	185.359
YEL004W	YEA4	142.667	133.797	116.267	93.773	92.418	129.857	124.647	119.466	107.07	130.998
YEL005C	VAB2	118.582	171.391	136.006	117.283	86.4687	132.504	102.918	175.707	105.67	74.2381
YEL006W	YEA6	191.939	180.47	150.598	157.323	180.324	192.245	174.531	180.217	188.714	155.715
YEL007W	YEL007W	416.899	278.108	244.92	261.474	241.467	228.76	232.748	238.286	197.085	154.7
YEL009C	GCN4	1222.28	937.013	879.238	813.335	1200.84	3413.18	721.972	975.255	932.338	1061.94
YEL011W	GLC3	147.086	215.314	207.337	265.608	162.866	153.704	192.744	223.7	194.832	171.327
YEL012W	UBC8	110.097	136.976	130.902	180.359	120.448	114.126	167.04	123.942	141.542	112.635
YEL013W	VAC8	201.864	224.282	200.034	215.402	209.735	214.044	229.827	225.556	232.569	215.235
YEL015W	EDC3	187.083	137.646	136.085	187.042	213.256	162.539	171.118	154.207	185.272	183.3
YEL016C	NPP2	143.469	117.195	128.689	177.988	146.879	127.94	126.898	144.795	155.292	183.216
YEL017W	GTT3	216.955	178.016	190.22	269.484	207.558	186.245	194.381	192.386	212.463	149.988
YEL018W	EAF5	281.219	228.234	236.233	279.916	143.277	185.811	211.612	224.639	207.408	155.049
YEL019C	MMS21	77.2589	63.6748	74.2891	59.3268	72.8399	43.2197	78.3519	70.7959	98.0486	79.9627
YEL020C	YEL020C	78.7527	79.2123	89.8825	109.961	86.1745	77.2496	137.44	89.2312	93.2426	115.07
YEL020W-A	TIM9	448.712	393.911	348.465	472.789	236.935	256.717	298.788	333.178	316.26	721.439
YEL021W	URA3	2.44004	1.97146	5.3084	9.0175	62.1123	4464.67	0.0280816	0	0	250.502
YEL022W	GEA2	124.086	97.4654	87.0582	98.0934	123.611	101.385	138.505	118.347	137.191	148.938
YEL023C	YEL023C	82.5374	92.5719	86.3303	91.5736	118.31	80.3322	129.264	107.215	106.504	86.37
YEL024W	RIP1	182.885	159.667	187.278	191.136	129.439	170.002	167.249	153.753	151.964	208.001
YEL025C	YEL025C	153.95	146.508	135.532	152.472	171.589	166.971	152.46	158.3	165.125	135.624
YEL026W	SNU13	603.289	290.918	243.1	301.399	348.694	379.702	338.319	318.093	366.388	352.66
YEL027W	CUP5	584.195	451.157	429.612	444.757	350.673	447.226	340.897	324.179	349.367	373.124
YEL029C	BUD16	126.419	158.987	109.208	131.035	139.936	197.884	144.943	190.438	164.105	197.327
YEL030W	ECM10	82.4897	75.9124	81.5285	77.7315	148.521	71.9559	96.9041	91.3402	104.25	103.373
YEL031W	SPF1	197.245	114.557	153.122	139.588	161.536	192.65	182.068	157.142	173.567	176.9
YEL032W	MCM3	169.123	120.871	144.156	160.141	151.113	178.318	139.927	164.084	175.356	156.411
YEL034W	HYP2	1843.43	760.456	621.267	880.103	672.005	583.702	559.871	577.891	502.014	496.245
YEL035C	UTR5	294.313	177.725	195.039	338.445	236.596	176.307	192.184	144.8	128.073	137.273
YEL036C	ANP1	189.875	124.218	133.276	192.479	137.434	170.59	176.323	151.841	125.423	198.268
YEL037C	RAD23	162.644	86.688	112.285	160.428	119.47	144.808	155.455	104.06	120.568	139.377
YEL038W	UTR4	94.1538	89.864	102.879	146.033	133.418	112.277	114.084	143.498	131.63	132.089
YEL039C	CYC7	324.595	448.852	465.974	172.261	502.954	154.362	502.016	247.744	256.332	311.635
YEL040W	UTR2	596.061	661.544	773.233	212.642	708.611	255.687	716.359	347.641	296.155	483.02
YEL041W	YEF1	88.3136	85.7236	128.299	82.2941	87.2808	87.5928	111.859	100.545	86.562	126.146
YEL042W	GDA1	160.501	86.8949	98.132	104.646	154.764	124.908	170.323	115.591	168.016	135.347
YEL043W	YEL043W	138.33	113.809	159.568	147.697	124.07	144.485	152.506	126.873	145.553	127.035
YEL044W	IES6	179.119	129.464	253.244	437.786	342.764	427.638	156.451	262.665	244.689	295.201
YEL046C	GLY1	867.988	768.261	1188.63	1393.37	1392.36	1215.91	949.116	847.835	763.545	759.972
YEL047C	YEL047C	140.578	177.46	152.227	198.658	168.601	196.027	139.588	227.984	174.638	124.456
YEL048C	YEL048C	153.28	119.852	120.308	86.8343	161.957	123.696	144.673	115.267	115.069	147.55
YEL049W	PAU2	99.7554	71.2644	78.1825	97.5528	88.0535	90.2771	104.52	121.622	88.1023	83.5417
YEL050C	RML2	145.297	131.717	135.664	162.796	134.896	152.435	128.154	138.138	113.959	131.873
YEL051W	VMA8	303.347	244.993	201.802	236.84	259.467	231.966	228.769	271.936	282.266	178.38
YEL052W	AFG1	121.867	147.797	145.577	182.405	165.248	180.578	123.251	167.953	154.523	266.629
YEL053C	MAK10	99.2049	100.257	79.7489	89.164	140.891	114.065	112.949	118.624	131.452	123.186
YEL054C	RPL12A	1006.46	778.951	505.341	551.652	406.778	386.104	337.788	606.441	474.389	418.404
YEL055C	POL5	189.928	123	113.17	137.059	184.749	126.813	135.644	139.121	165.816	171.1
YEL056W	HAT2	205.498	159.611	169.843	176.021	174.432	174.138	192.526	199.687	156.941	178.633
YEL057C	YEL057C	134.355	128.997	93.0384	121.489	112.721	100.515	129.872	128.721	133.36	111.945
YEL058W	PCM1	119.535	122.127	137.861	175.631	133.87	143.807	112.337	139.045	192.032	176.951
YEL059C-A	SOM1	87.6918	115.69	100.418	133.196	87.6376	108.438	65.6282	106.663	147.986	158.341
YEL060C	PRB1	198.578	327.195	523.679	370.848	235.139	261.912	233.682	277.292	274.806	249.78
YEL061C	CIN8	140.12	77.6598	91.8781	78.5027	144.116	87.8992	114.997	91.1209	124.464	139.647
YEL062W	NPR2	112.312	141.922	130.498	106.975	130.299	107.51	152.66	120.77	132.721	119.389
YEL063C	CAN1	191.652	410.515	310.851	363.033	330.936	343.327	334.12	451.064	311.833	272.358
YEL064C	AVT2	87.4213	102.892	101.196	82.1748	129.255	98.1366	124.478	136.44	139.893	177.88
YEL065W	SIT1	85.9616	70.0566	86.7089	75.906	100.048	81.5939	114.589	70.7031	110.423	159.247
YEL066W	HPA3	82.6573	77.0903	79.2529	116.569	83.1385	79.0444	92.8636	107.567	87.6696	97.5679
YEL069C	HXT13	60.4656	102.699	123.724	124.332	160.223	173.707	146.943	145.256	161.659	137.571
YEL070W	DSF1	25.6906	37.5908	52.1925	77.9335	65.924	62.2592	74.6666	64.2738	66.2409	31.1731
YEL071W	DLD3	334.563	898.76	2167.28	1141.3	1233.9	1220.27	932.494	1625.98	1660.66	1609.02
YEL072W	RMD6	116.645	125.273	118.168	115.05	121.042	142.372	154.564	144.861	117.47	211.902
YEL073C	YEL073C	220.962	151.157	283.714	159.296	138.56	100.843	167.226	158.12	143.717	146.403
YEL075C	YEL075C	84.6506	53.6589	69.3976	69.1924	79.2635	74.6065	86.3887	78.7266	74.7687	101.371
YEL076C	YEL076C	97.1859	54.5708	85.1324	88.0788	76.6887	96.5246	100.614	96.5415	90.6875	80.1276
YEL076C-A	YEL076C-A	104.449	59.532	92.5578	102.593	87.7964	106.656	113.955	102.333	103.239	99.1718
YEL077C	YEL077C	105.831	69.5375	130.403	119.286	133.907	122.676	153.195	105.108	129.995	131.229
YER001W	MNN1	278.817	189.852	197.192	113.947	214.062	132.995	183.89	107.593	115.549	133.257
YER002W	NOP16	197.774	106.499	102.033	127.653	126.637	105.594	175.678	107.397	109.379	135.779
YER003C	PMI40	165.993	80.3253	93.3434	69.8268	99.6513	97.104	132.033	92.9023	115.297	126.616
YER004W	FMP52	184.427	102.268	132.851	177.748	130.928	201.753	145.337	133.422	130.565	148.822
YER005W	YND1	176.631	152.361	138.171	172.525	148.838	188.748	164.996	136.657	181.248	202.977
YER006W	NUG1	158.604	80.3397	88.8541	120.518	125.761	144.874	123.183	116.205	156.564	193.35
YER007C-A	TMA20	205.127	180.836	135.611	152.559	157.049	193.039	184.367	197.088	177.678	163.92
YER007W	PAC2	107.513	98.1036	111.262	95.6924	229.653	103.819	118.789	111.069	101.054	121.355
YER008C	SEC3	133.522	121.073	130.933	130.146	127.063	122.079	162.52	136.153	137.793	158.86
YER009W	NTF2	289.805	244.947	206.649	211.961	189.863	298.248	291.666	231.445	215.954	226.573
YER010C	YER010C	149.149	151.074	201.817	126.453	143.592	161.052	207.799	143.655	154.973	176.159
YER011W	TIR1	43.0639	47.3321	83.9521	53.6847	88.3722	56.8418	74.8291	68.6571	59.101	63.187
YER012W	PRE1	371.274	186.304	179.983	224.956	155.278	302.575	216.621	172.823	169.412	235.003
YER013W	PRP22	94.7389	78.7443	88.6082	91.4163	105.521	94.5021	134.45	89.4768	114.955	129.982
YER014C-A	BUD25	81.3702	75.2575	119.873	88.87	111.148	79.0683	102.532	82.5436	120.869	99.5258
YER014W	HEM14	67.9989	75.8941	97.0658	90.4976	130.04	54.8823	101.322	89.4413	101.323	110.651
YER015W	FAA2	69.8397	66.8088	68.8171	68.7772	76.5754	76.7285	113.682	78.8688	108.333	79.9961
YER016W	BIM1	140.828	123.213	116.85	136.99	153.317	112.725	188.654	119.542	129.65	177.673
YER017C	AFG3	157.272	141.544	148.986	200.37	198.655	159.937	206.036	191.344	219.646	179.672
YER018C	SPC25	191.442	118.162	195.551	227.884	127.432	181.516	195.211	105.308	207.941	253.178
YER019C-A	SBH2	588.654	439.329	489.406	469.592	418.439	430.277	369.134	347.226	333.477	452.8
YER019W	ISC1	245.323	187.669	235.299	276.855	166.004	199.335	204.58	188.223	276.395	176.532
YER020W	GPA2	130.008	211.758	280.533	287.404	142.594	143.987	163.722	244.237	144.628	137.277
YER021W	RPN3	282.836	204.223	186.459	187.054	188.14	224.538	197.64	207.754	186.758	251.049
YER022W	SRB4	112.259	109.453	111.764	105.196	120.139	109.385	124.476	102.265	137.75	101.311
YER023W	PRO3	182.926	256.316	300.062	344.744	224.702	350.443	219.788	361.756	293.971	280.512
YER024W	YAT2	130.375	377.327	430.302	410.137	480.201	568.883	296.521	737.652	523.714	319.918
YER025W	GCD11	278.54	184.726	211.468	263.218	230.118	232.807	200.413	280.117	261.154	189.791
YER026C	CHO1	476.056	225.999	192.44	202.401	267.104	210.023	258.334	205.677	218.639	174.121
YER027C	GAL83	122.739	117.805	134.816	164.265	113.787	138.709	149.676	127.253	146.749	147.566
YER028C	MIG3	121.855	141.72	129.537	127.441	138.093	79.8958	156.81	145.627	141.726	143.585
YER029C	SMB1	152.466	162.294	204.021	264.768	146.198	185.15	168.085	248.338	235.821	208.031
YER030W	CHZ1	170.33	167.364	162.137	168.274	170.576	175.047	158.643	171.1	156.38	157.494
YER031C	YPT31	188.516	187.717	196.251	182.65	144.31	163.745	171.833	198.277	160.968	197.514
YER032W	FIR1	132.299	83.3152	88.7496	90.1708	151.101	83.6935	120.337	105.091	121.326	133.908
YER033C	ZRG8	89.5677	107.873	116.338	107.973	133.124	101.162	140.461	104.833	148.393	150.012
YER034W	YER034W	122.391	136.554	205.747	207.287	423.585	123.835	120.211	120.147	133.957	136.255
YER035W	EDC2	421.845	583.231	597.084	726.092	257.646	391.771	420.945	515.403	427.365	327.106
YER036C	ARB1	357.126	236.7	181.218	237.775	193.264	226.422	183.812	203.696	235.527	175.852
YER037W	PHM8	192.336	676.485	305.055	248.382	208.885	129.305	205.115	304.426	167.527	163.371
YER038C	KRE29	109.331	263.827	145.436	107.386	145.552	85.8193	126.623	137.745	105.477	84.8542
YER039C	HVG1	154.537	197.393	186.855	220.45	166.868	225.529	129.38	239.525	132.068	113.445
YER039C-A	YER039C-A	172.967	180.078	191.21	199.749	123.908	263.178	144.392	222.53	160.336	148.405
YER040W	GLN3	117.997	243.189	224.557	270.856	305.161	306.101	247.517	317.518	283.416	256.813
YER041W	YEN1	88.1116	92.2576	126.331	91.805	127.461	97.5023	118.737	123.45	94.2873	97.9008
YER042W	MXR1	234.548	176.19	164.726	160.845	168.946	190.869	198.074	185.147	187.247	139.435
YER043C	SAH1	535.41	194.525	282.021	279.959	266.362	285.951	250.17	237.627	233.608	203.686
YER044C	ERG28	271.179	281.182	242.533	260.134	215.872	275.247	271.02	266.84	172.435	227.716
YER044C-A	MEI4	97.5779	87.275	93.8257	72.6472	72.6074	87.0035	114.069	92.8211	105.488	144.189
YER045C	ACA1	59.9829	87.9664	118.913	122.568	97.9587	97.2311	121.739	139.253	123.854	87.6712
YER046W	SPO73	159.939	155.742	183.672	218.524	185.314	208.298	161.151	221.243	195.659	257.429
YER047C	SAP1	102.12	117.498	135.235	140.17	133.722	153.415	151.225	143.415	171.586	161.991
YER048C	CAJ1	131.622	116.261	118.089	164.093	131.498	102.416	151.431	145.523	132.08	116.118
YER048W-A	ISD11	249.504	268.227	162.696	239.672	192.51	234.961	232.787	263.028	188.3	263.769
YER049W	TPA1	152.625	132.308	130.901	131.297	147.424	161.455	131.368	156.152	168.593	196.297
YER050C	RSM18	151.796	186.255	158.984	138.736	187.029	182.554	232.909	182.458	186.315	205.13
YER051W	JHD1	92.696	231.558	186.077	132.379	189.112	133.868	164.594	220.017	176.905	200.859
YER052C	HOM3	193.258	1222.03	1099.48	740.8	814.613	669.044	646.157	960.93	664.621	556.441
YER053C	PIC2	229.293	739.658	434.797	468.595	341.99	296.441	351.554	548.74	329.594	323.951
YER054C	GIP2	138.363	146.753	114.469	97.9767	139.143	69.8749	161.051	97.1131	88.6835	89.0418
YER055C	HIS1	326.843	1211.45	860.182	1211.39	953.544	1066.71	857.449	1379.06	1002.59	614.868
YER056C	FCY2	418.282	533.844	505.785	604.609	635.713	703.612	396.605	519.22	509.767	466.096
YER056C-A	RPL34A	754.295	675.809	434.053	443.523	383.315	337.244	328.381	451.95	370.957	234.515
YER057C	HMF1	228.159	283.865	283.726	261.993	329.4	221.048	218.569	231.786	184.873	382.126
YER058W	PET117	156.178	229.21	230.944	206.439	154.23	156.882	193.256	215.301	188.686	336.179
YER059W	PCL6	149.163	170.284	137.204	150.1	136.771	184.759	152.434	206.765	177.182	134.12
YER060W	FCY21	168.379	222.729	188.875	198.98	159.296	137.035	160.196	250.115	138.965	101.255
YER060W-A	FCY22	95.4669	151.338	141.792	148.357	145.787	130.96	131.777	190.797	126.155	88.3251
YER061C	CEM1	89.7894	152.011	143.525	147.152	138.851	193.344	119.639	187.656	126.291	87.8659
YER062C	HOR2	212.5	399.825	259.605	294.186	220.629	159.829	195.062	242.82	165.562	170.729
YER063W	THO1	427.813	325.589	370.386	657.168	443.008	506.242	332.109	331.649	376.123	307.795
YER064C	YER064C	426.963	225.721	313.582	778.395	503.88	784.195	401.338	289.469	507.824	351.578
YER065C	ICL1	286.555	244.514	241.462	569.844	205.98	451.596	223.621	316.758	215.855	276.443
YER066W	YER066W	81.3808	104.488	77.1716	103.217	109.636	119.427	98.7015	112.686	121.486	110.781
YER067W	YER067W	194.458	367.23	158.548	114.096	142.979	113.967	231.27	136.983	117.339	127.67
YER068W	MOT2	204.062	578.544	385.148	815.742	513.739	701.938	354.197	815.887	428.57	421.923
YER069W	ARG5,6	128.927	1612.99	640.719	1918.84	2303.21	1152.53	1597.49	2014.61	2295.5	1427.59
YER070W	RNR1	616.241	102.978	129.605	100.715	131.732	166.959	136.607	129.786	132.314	124.106
YER071C	YER071C	332.164	225.943	164.592	138.772	337.622	190.255	186.562	164.518	222.281	150.566
YER072W	VTC1	521.839	380.721	357.413	630.539	334.714	770.477	287.188	296.268	345.831	258.563
YER073W	ALD5	400.615	1219.1	781.07	1547.23	965.296	1444.87	617.766	1129.32	597.397	541.682
YER074W	RPS24A	827.976	764.608	510.719	522.598	526.64	433.716	379.736	581.427	416.633	358.588
YER074W-A	YOS1	189.625	194.035	209.463	142.713	153.647	156.018	134.37	174.638	170.739	172.299
YER075C	PTP3	138.159	89.4616	95.3734	113.383	106.085	130.95	105.851	96.6062	110.585	101.532
YER076C	YER076C	80.2656	90.3725	101.047	107.59	84.8207	93.5147	141.133	101.884	94.4337	144.576
YER077C	YER077C	99.0991	99.202	89.8862	93.1434	129.256	93.9281	134.975	103.669	122.752	125.034
YER078C	YER078C	98.4939	141.798	141.329	137.908	154.562	156.778	164.188	152.003	129.524	111.956
YER079W	YER079W	138.521	223.473	183.092	204.079	107.08	197.551	130.618	200.995	189.664	118.873
YER080W	FMP29	138.228	135.802	148.776	159.76	125.201	158.84	154.883	126.294	136.518	91.8603
YER081W	SER3	539.45	825.312	461.681	1281.47	901.243	964.709	658.86	753.187	600.882	435.1
YER082C	UTP7	149.032	114.848	121.53	261.161	139.147	266.349	129.708	168.713	154.146	223.442
YER083C	GET2	159.287	135.556	141.73	190.016	228.46	148.103	140.541	136.552	182.677	116.383
YER085C	YER085C	41.4822	59.1554	55.9345	65.9083	60.3064	37.9727	81.8726	94.0947	77.4813	67.7251
YER086W	ILV1	183.776	365.076	285.012	367.93	385.564	373.442	291.374	441.686	389.034	292.164
YER087C-B	SBH1	290.22	181.836	242.718	168.66	153.484	203.314	161.701	266.102	167.218	226.279
YER087W	YER087W	104.642	126.831	118.677	119.087	117.443	102.309	118.804	110.433	120.012	93.3157
YER088C	DOT6	359.029	241.219	255.636	502.343	343.831	258.406	277.513	288.079	347.408	271.271
YER089C	PTC2	315.037	299.525	283.161	569.678	268.759	373.799	268.715	352.757	316.612	306.578
YER090W	TRP2	155.604	526.752	379.586	502.58	549.019	547.669	377.185	638.129	530.123	400.83
YER091C	MET6	495.849	1279.26	548.677	960.107	1008.09	1814.37	517.047	1455.39	1093.36	1116.14
YER092W	IES5	311.889	352.243	304.218	312.217	215.639	388.899	247.898	274.442	266.249	181.757
YER093C	TSC11	113.751	110.335	93.2686	117.135	142.088	128.512	152.327	144.155	123.742	134.671
YER093C-A	YER093C-A	174.102	140.01	151.203	189.323	142.851	151.214	186.314	149.407	254.524	140.653
YER094C	PUP3	287.154	173.447	192.856	269.397	184.326	284.082	228.942	203.585	320.671	310.439
YER095W	RAD51	174.932	99.6753	123.103	155.607	119.173	89.2405	120.1	158.004	109.331	159.54
YER096W	SHC1	48.8487	56.4318	56.7543	78.408	129.606	66.0002	89.3643	90.3447	79.0803	96.4076
YER098W	UBP9	88.5989	80.6814	89.7743	100.265	109.742	93.5823	117.276	111.751	120.302	100.919
YER099C	PRS2	141.654	119.188	119.286	148.365	138.464	155.287	120.994	115.581	160.347	122.458
YER100W	UBC6	141.793	133.925	117.279	143.171	135.996	127.387	188.351	158.583	145.852	116.731
YER101C	AST2	95.6271	104.805	114.413	119.971	108.619	81.6291	93.1565	138.043	109.438	115.172
YER102W	RPS8B	791.64	660.888	548.608	539.139	559.284	500.413	375.637	660.346	517.711	363.524
YER103W	SSA4	125.529	140.939	252.949	124.963	137.855	95.2566	153.608	118.811	116.197	134.54
YER104W	RTT105	121.78	104.933	145.938	121.883	114.611	167.615	140.008	144.716	201.473	93.159
YER105C	NUP157	154.213	128.421	122.119	138.853	153.396	157.371	151.407	141.604	190.703	161.872
YER106W	MAM1	49.5785	58.5485	43.9482	52.8832	64.6206	49.0344	75.131	65.9161	68.1098	73.8375
YER107C	GLE2	138.141	120.531	138.091	157.245	255.074	148.735	164.995	143.01	262.419	124.936
YER109C	FLO8	114.289	79.9303	82.3574	110.19	120.774	107.46	135.241	105.879	132.783	122.787
YER110C	KAP123	167.58	76.2135	78.3315	126.416	138.243	122.899	131.347	101.147	165.074	148.928
YER111C	SWI4	125.394	98.0902	105.775	88.2303	96.6078	125.471	121.638	116.466	105.468	107.224
YER112W	LSM4	198.865	179.447	154.659	139.822	135.367	184.766	152.328	164.663	178.887	259.795
YER113C	YER113C	151.46	126.775	121.086	115.567	144.704	121.865	151.565	148.348	199.545	170.804
YER114C	BOI2	113.81	80.7784	83.784	107.48	130.844	104.165	133.301	105.385	123.885	119.795
YER115C	SPR6	158.555	148.692	115.047	107.455	112.313	109.376	95.5949	125.983	113.9	143.953
YER116C	SLX8	112.013	124.29	184.323	156.509	117.921	113.315	124.785	131.021	159.629	112.541
YER117W	RPL23B	908.092	882.557	579.214	585.774	456.196	515.894	425.95	648.769	500.253	359.008
YER118C	SHO1	169.672	123.355	137.503	123.332	149.236	106.931	145.981	135.489	141.495	97.0378
YER119C	AVT6	152.078	131.892	152.13	183.546	136.834	102.378	155.626	157.919	153.013	130.176
YER120W	SCS2	253.29	210.415	230.646	261.616	204.602	208.429	262.155	190.926	189.385	197.792
YER122C	GLO3	260.015	198.66	180.511	189.353	152.521	165.011	168.158	192.705	189.197	221.203
YER123W	YCK3	155.261	199.329	154.426	204.26	195.879	198.514	185.105	227.388	204.082	181.426
YER124C	DSE1	606.344	886.913	469.427	242.032	501.106	162.638	467.026	567.384	410.375	248.066
YER125W	RSP5	213.753	212.483	218.778	248.968	182.248	191.955	204.635	210.038	198.173	206.621
YER126C	NSA2	191.334	92.2973	61.5333	105.812	115.995	150.19	113.432	104.33	110.272	132.289
YER127W	LCP5	152.015	72.4791	81.7564	99.4945	103.07	102.108	122.654	101.195	122.759	90.5469
YER128W	YER128W	142.397	171.016	146.556	132.893	151.133	231.641	184.208	227.661	144.039	165.139
YER129W	SAK1	147.438	139.373	150.98	159.105	167.832	163.448	158.39	167.413	175.131	200.865
YER130C	YER130C	222.595	250.086	262.155	218.609	196.263	205.288	170.092	210.495	253.419	150.59
YER131W	RPS26B	826.141	636.76	409.313	530.077	345.991	428.54	280.835	493.913	271.038	266.035
YER132C	PMD1	130.798	126.436	119.769	121.534	132.648	119.715	121.864	143.003	147.995	136.272
YER133W	GLC7	377.878	310.867	226.119	278.215	300.164	274.939	233.069	248.877	238.074	231.927
YER134C	YER134C	138.275	133.348	155.75	154.297	102.361	90.031	118.931	122.084	139.498	238.387
YER136W	GDI1	229.166	202.364	214.968	241.71	161.365	189.669	180.881	241.423	196.358	194.618
YER137C	YER137C	120.188	102.107	83.7057	151.391	107.238	94.0668	143.485	135.328	120.187	95.014
YER137C-A	YER137C-A	355.051	406.782	475.963	258.413	262.547	257.895	262.901	310.543	253.266	213.713
YER138C	YER138C	364.089	413.893	466.995	232.246	291.797	261.422	252.274	299.952	250.567	212.583
YER139C	YER139C	118.661	119.724	84.2936	84.3525	118.767	97.3125	121.595	116.904	93.278	121.206
YER140W	YER140W	97.4594	80.3784	101.877	89.9652	145.164	109.311	125.844	94.5544	121.177	130.174
YER141W	COX15	174.687	235.327	240.661	278.16	223.305	179.038	264.601	306.513	289.095	212.08
YER142C	MAG1	99.0098	131.316	136.344	103.218	101.667	143.113	152.358	116.515	124.589	140.805
YER143W	DDI1	130.399	118.905	139.093	161.272	113.854	135.324	137.554	141.184	127.692	149.218
YER144C	UBP5	121.068	145.566	183.719	165.761	147.025	144.203	138.866	158.223	135.956	193.28
YER145C	FTR1	228.802	134.438	186.68	264.862	200.456	334.503	135.359	156.527	155.077	142.879
YER146W	LSM5	289.752	162.988	188.407	299.931	169.616	248.913	151.031	142.517	349.489	306.79
YER147C	SCC4	117.165	94.2956	109.844	137.684	106.225	105.616	110.913	115.235	128.826	154.859
YER148W	SPT15	209.13	218.329	187.084	223.527	226.08	200.624	227.896	231.588	226.264	204.43
YER149C	PEA2	124.109	102.55	95.3089	108.113	153.852	128.575	160.991	116.847	140.838	104.68
YER150W	SPI1	135.58	200.147	218.535	268.441	115.299	120.936	157.473	137.025	146.578	88.9956
YER151C	UBP3	152.574	109.602	129.85	122.005	119.934	114.022	161.459	129.683	126.708	126.767
YER152C	YER152C	110.523	87.8582	141.387	152.951	82.7447	138.459	117.196	111.493	108.412	155.003
YER153C	PET122	106.683	71.312	117.556	156.894	129.95	89.8488	93.9048	90.0437	84.7627	131.373
YER154W	OXA1	248.828	189.949	224.262	265.374	180.389	214.347	192.2	215.271	174.642	188.129
YER155C	BEM2	219.469	189.08	168.235	162.974	166.011	159.771	145.902	173.795	154.275	148.465
YER156C	YER156C	370.424	241.168	146.116	235.615	164.315	182.78	122.771	185.272	158.148	139.396
YER157W	COG3	128.059	118.893	106.268	99.0762	135.181	96.5749	117.555	116.133	128.669	157.678
YER158C	YER158C	102.478	104.36	127.254	120.723	101.446	93.1488	115.954	96.4356	129.218	158.218
YER159C	BUR6	331.365	287.232	303.598	235.516	537.826	161.898	451.781	290.483	408.278	515.381
YER159C-A	YER159C-A	226.711	259.977	268.324	172.058	179.479	173.289	180.254	194.408	188.476	144.217
YER160C	YER160C	185.578	225.453	255.141	151.606	179.466	164.899	169.427	176.212	164.337	146.671
YER161C	SPT2	127.604	122.512	115.057	135.375	105.366	138.007	156.105	148.461	157.403	130.396
YER162C	RAD4	91.1416	101.3	106.833	107.075	154.777	98.753	121.331	117.504	107.944	128.836
YER163C	YER163C	166.601	195.277	196.618	239.124	181.716	174.053	189.209	224.428	148.152	127.195
YER164W	CHD1	114.79	92.9946	108.616	108.098	124.846	100.833	109.061	99.9397	118.727	86.6128
YER165W	PAB1	335.529	200.524	212.108	224.814	192.697	308.312	223.27	213.127	204.977	226.635
YER166W	DNF1	145.739	115.211	111.059	127.21	135.152	116.26	140.928	131.841	153.304	141.311
YER167W	BCK2	133.638	119.773	137.033	134.362	131.157	132.572	128.57	156.024	146.665	142.182
YER168C	CCA1	134.379	110.049	111.14	108.823	118.66	131.2	125.068	119.011	122.559	110.458
YER169W	RPH1	119.422	109.788	95.0249	131.503	109.228	100.422	122.768	123.506	129.237	159.029
YER170W	ADK2	145.402	138.88	143.491	153.069	152.609	132.313	131.345	190.537	188.129	145.358
YER171W	RAD3	132.987	117.702	116.527	110.024	118.065	113.238	150.094	139.795	132.06	157.554
YER172C	BRR2	116.694	97.6676	94.7082	99.3333	115.27	97.2146	138.286	96.9541	128.35	120.904
YER173W	RAD24	108.686	131.703	115.285	109.65	186.049	119.395	150.652	128.4	162.433	225.278
YER174C	GRX4	158.774	954.759	533.332	329.436	385.487	510.586	261.256	608.674	279.495	202.913
YER175C	TMT1	135.638	1305.46	630.521	400.804	468.255	664.072	279.598	727.548	322.956	165.391
YER176W	ECM32	299.257	458.238	278.962	317.112	240.555	420.983	196.15	398.42	205.623	154.968
YER177W	BMH1	749.221	567.667	497.355	701.975	261.27	471.251	339.847	633.783	397.583	261.77
YER178W	PDA1	229.851	309.638	327.014	432.661	252.426	309.882	262.351	367.352	329.582	295.592
YER179W	DMC1	72.3991	83.6163	90.6406	84.2462	88.2124	84.0121	119.554	109.199	95.495	99.8865
YER180C	ISC10	150.907	104.563	84.1012	100.386	146.269	131.144	148.345	97.3332	109.303	171.049
YER180C-A	SLO1	144.753	105.931	101.938	121.866	90.7071	85.7718	128.13	127.938	107.046	78.6102
YER182W	FMP10	115.051	132.319	129.083	154.228	105.443	147.15	145.005	162.029	108.65	112.573
YER183C	FAU1	128.248	133.235	128.489	133.348	102.339	140.974	152.147	172.027	116.35	120.572
YER184C	YER184C	100.442	155.233	177.592	145.243	128.1	144.489	168.562	176.312	151.579	158.241
YER185W	YER185W	60.6405	73.9428	89.0048	74.2191	100.617	112.169	116.257	109.321	135.91	132.997
YER186C	YER186C	98.1768	82.3304	116.606	77.8962	96.5448	94.7238	129.911	58.1079	94.9098	75.8503
YER187W	YER187W	47.9106	78.1543	67.7545	74.2654	60.5418	73.6801	74.7362	43.8044	56.6062	44.4689
YER188C-A	YER188C-A	78.8615	59.5019	76.6255	70.0595	67.0756	117.491	89.9807	57.2004	110.435	80.9493
YER189W	YER189W	165.897	100.888	197.405	140.526	126.027	178.997	202.14	162.421	173.106	211.7
YER190W	YRF1-2	114.019	71.5191	144.383	121.085	120.886	116.193	141.682	108.913	138.487	136.762
YFL001W	DEG1	136.067	88.2643	118.282	106.568	128.819	105.61	106.229	120.054	154.12	105.075
YFL002C	SPB4	125.687	77.0842	84.855	98.2678	108.082	112.292	111.054	85.1989	105.343	128.978
YFL002W-A	YFL002W-A	101.131	89.7219	91.7901	93.8737	99.4577	106.154	97.2529	92.2597	93.2831	87.5453
YFL002W-B	YFL002W-B	97.6018	86.5326	91.4472	99.3904	107.755	106.811	88.0501	100.685	92.6787	93.7704
YFL003C	MSH4	56.0767	60.3503	55.9908	52.0876	83.4866	62.656	86.7866	73.4646	61.6074	85.4728
YFL004W	VTC2	125.509	115.78	146.604	120.225	145.49	145.868	132.941	142.292	143.168	136.42
YFL005W	SEC4	181.734	194.879	212.508	217.619	194.488	251.048	173.104	255.454	200.983	169.082
YFL007W	BLM10	136.854	98.2425	102.656	121.796	142.009	127.804	153.76	118.973	151.956	138.867
YFL008W	SMC1	122.14	71.2694	85.7316	81.4783	96.6998	106.937	110.258	107.713	117.861	110.694
YFL009W	CDC4	121.413	121.721	138.817	131.625	122.087	137.548	119.548	135.76	160.438	125.599
YFL010C	WWM1	136.483	183.101	285.021	245.613	149.351	184.412	154.676	245.323	189.037	183.644
YFL010W-A	AUA1	124.986	164.017	250.646	211.767	153.568	215.041	115.83	208.526	172.946	255.398
YFL011W	HXT10	34.5672	30.9775	44.3273	42.5733	126.767	43.1944	66.3758	52.4786	60.304	46.914
YFL012W	YFL012W	59.9306	52.8947	41.8966	60.7862	80.8099	43.8777	109.954	66.5164	104.102	52.0185
YFL013C	IES1	153.895	236.406	167.971	163.947	194.796	134.949	190.789	141.697	180.656	156.839
YFL014W	HSP12	599.674	1614.09	398.629	391.036	471.221	81.2246	630.234	238.257	186.719	106.095
YFL016C	MDJ1	210.023	169.841	332.466	272.322	202.265	315.89	254.851	170.52	223.349	301.801
YFL017C	GNA1	226.225	203.736	215.331	164.974	235.996	219.33	265.838	210.401	207.056	169.382
YFL017W-A	SMX2	297.903	235.863	225.699	241.728	225.207	212.38	181.218	244.273	250.067	235.734
YFL018C	LPD1	198.161	279.175	248.547	307.039	257.649	313.161	301.549	338.753	269.822	369.202
YFL020C	PAU5	41.3702	66.7468	77.0663	92.9989	96.9932	73.7884	95.1895	94.396	101.94	117.043
YFL021W	GAT1	184.515	270.364	247.175	266.326	191.768	303.413	213.589	214.465	234.595	214.798
YFL022C	FRS2	242.36	157.645	160.498	237.791	268.493	207.016	144.269	190.274	183.082	137.901
YFL023W	BUD27	101.331	69.487	67.6656	91.5442	96.106	79.2003	94.9271	74.8365	97.1156	91.2819
YFL024C	EPL1	249.415	217.919	183.468	234.551	206.582	223.773	247.074	215.281	203.711	232.182
YFL025C	BST1	196.253	310.251	164.091	115.024	187.018	143.682	147.946	190.468	184.26	132.13
YFL026W	STE2	1374.72	2683.8	962.415	447.553	865.15	286.82	395.176	922.358	402.854	225.577
YFL027C	GYP8	157.598	342.176	227.119	156.26	183.421	202.199	198.959	266.766	160.241	139.322
YFL028C	CAF16	105.714	336.59	218.047	260.009	338.82	338.595	214.543	348.925	229.052	206.825
YFL029C	CAK1	80.312	165.484	219.468	179.604	154.543	137.058	130.363	197.946	164.611	125.473
YFL030W	AGX1	76.4826	141.105	167.233	184.421	139.357	137.144	131.466	181.221	177.734	110.029
YFL031W	HAC1	573.265	592.795	640.553	687.139	460.101	597.06	480	524.845	593.646	507.46
YFL033C	RIM15	96.8245	98.6179	99.6746	121.739	106.573	85.567	133.302	114.527	105.536	112.847
YFL034C-A	RPL22B	1056.18	1110.13	719.814	702.995	540.354	582.161	427.803	817.908	547.608	501.225
YFL034C-B	MOB2	194.828	200.452	177.828	187.805	167.102	136.45	134.911	205.711	160.304	215.786
YFL034W	YFL034W	85.6469	92.8216	95.8115	103.504	108.704	110.636	107.068	111.249	113.301	115.529
YFL036W	RPO41	131.564	126.643	118.416	127.519	136.482	115.882	160.692	135.406	141.836	182.832
YFL037W	TUB2	203.939	100.885	151.439	150.47	117.734	115.586	180.7	113.461	170.636	146.466
YFL038C	YPT1	352.425	289.225	336.528	460.248	403.484	289.557	313.626	341.064	261.652	259.923
YFL039C	ACT1	679.544	596.632	610.411	653.676	431.488	672.983	558.402	549.725	558.55	540.908
YFL040W	YFL040W	95.493	99.0706	115.506	90.0397	101.85	97.5226	121.004	96.1951	99.0895	95.1439
YFL041W	FET5	85.7864	91.8955	103.612	129.054	127.391	143.125	130.88	158.028	106.113	141.305
YFL041W-A	YFL041W-A	100.758	115.907	78.8372	120.118	83.3393	114.467	112.83	135.965	181.691	109.472
YFL042C	YFL042C	77.9821	119.029	117.043	156.293	138.477	135.188	118.996	169.473	137.216	122.026
YFL044C	OTU1	219.393	129.748	174.064	189.686	111.281	143.965	172.31	131.468	164.069	96.0177
YFL045C	SEC53	473.884	240.011	208.867	216.602	209.69	264.3	253.132	247.37	210.302	201.222
YFL046W	FMP32	236.195	218.929	241.579	177.794	203.541	206.27	143.143	265.538	228.037	178.179
YFL047W	RGD2	135.386	163.542	115.385	136.364	146.43	119.459	147.326	138.04	144.097	127.652
YFL048C	EMP47	143.818	147.438	141.361	159.216	134.212	172.615	192.092	174.777	188.03	166.678
YFL049W	SWP82	109.962	101.595	102.382	108.174	128.203	105.02	137.503	117.889	138.203	143.905
YFL050C	ALR2	75.0459	78.783	85.5726	91.1012	97.7111	88.64	117.001	85.8186	137.795	94.0037
YFL051C	YFL051C	35.3981	39.678	69.3496	79.0396	142.691	70.7605	75.7268	66.0487	78.7417	67.0901
YFL052W	YFL052W	33.2136	36.8553	34.3654	60.1621	51.5488	55.745	82.2657	53.1048	77.0034	79.2826
YFL053W	DAK2	39.01	43.3711	59.964	62.1423	76.1401	35.669	109.472	78.417	87.7842	83.3024
YFL054C	YFL054C	60.9141	78.7394	70.2912	128.925	87.7444	80.2144	115.028	96.4407	118.896	89.6525
YFL055W	AGP3	57.4749	64.8715	105.238	99.6973	95.1146	84.6286	151.134	87.7207	94.0556	148.353
YFL056C	AAD6	123.192	92.3007	107.56	136.742	101.084	135.296	105.492	141.111	136.724	197.431
YFL057C	AAD16	128.249	87.6757	104.193	112.197	124.155	131.741	128.862	101.625	141.135	118.07
YFL058W	THI5	32.4046	29.8683	60.6802	59.9626	50.3156	46.0791	64.789	49.2559	51.2295	72.729
YFL059W	SNZ3	63.613	52.1296	73.8694	94.4421	62.6783	103.811	91.184	101.587	100.878	80.0696
YFL060C	SNO3	64.1275	51.9953	61.7915	63.594	74.9539	81.296	75.377	55.3752	67.9193	77.2732
YFL061W	DDI2	64.2045	57.9009	78.6599	89.9323	107.994	80.9143	104.001	94.7473	107.099	103.789
YFL062W	COS4	43.9962	48.5214	66.7377	65.6996	80.2332	73.743	84.448	75.2689	95.4904	132.997
YFL064C	YFL064C	234.81	153.973	250.969	225.511	271.553	307.997	330.247	247.185	314.418	388.127
YFL065C	YFL065C	105.664	63.8031	129.858	106.409	79.1221	101.586	148.871	98.143	140.754	106.015
YFL066C	YFL066C	93.586	65.8466	134.382	99.5869	104.917	109.891	121.151	96.5859	111.873	112.581
YFL067W	YFL067W	49.0045	37.1637	162.946	90.395	62.8655	68.4742	83.1408	46.8841	65.344	96.3977
YFL068W	YFL068W	103.914	72.7142	156.957	119.071	128.201	123.868	146.988	100.629	149.922	173.81
YFR001W	LOC1	176.259	100.933	104.081	95.8365	96.9131	129.724	132.781	116.739	114.546	140.034
YFR002W	NIC96	191.439	156.302	148.79	141.223	169.246	169.954	189.704	134.525	171.913	228.621
YFR003C	YPI1	217.171	227.844	242.819	260.06	168.028	193.978	246.952	173.189	195.168	296.324
YFR004W	RPN11	274.73	209.811	190.306	212.313	205.62	231.098	243.543	215.206	197.667	244.924
YFR005C	SAD1	141.056	163.111	124.157	164.913	134.161	136.887	112.969	167.547	171.201	117.975
YFR006W	YFR006W	109.763	146.412	167.61	170.429	151.044	139.832	188.145	152.531	160.949	155.572
YFR007W	YFR007W	122.659	165.552	155.098	169.945	144.459	157.097	158.031	174.572	175.923	175.209
YFR008W	FAR7	97.3127	115.865	91.4572	112.255	113.666	124.351	126.521	130.115	129.403	152.903
YFR009W	GCN20	181.458	130.816	139.736	145.474	137.659	130.375	134.871	144.643	197.626	212.739
YFR010W	UBP6	197.229	197.605	192.288	189.369	179.407	195.889	209.651	192.862	165.381	156.371
YFR011C	YFR011C	173.904	160.824	168.897	132.475	143.953	132.503	146.916	172.628	125.315	121.516
YFR012W	YFR012W	42.3044	47.4826	60.8521	47.5631	54.6444	49.7156	83.5382	52.2224	69.7486	168.571
YFR013W	IOC3	104.853	101.698	118.258	103.757	112.814	112.343	156.92	117.806	115.585	111.102
YFR014C	CMK1	125.198	132.691	164.555	142.246	124.542	180.765	170.59	143.411	120.665	123.01
YFR015C	GSY1	104.355	175.4	134.996	104.755	95.6592	70.1388	136.849	114.911	98.181	115.087
YFR016C	YFR016C	91.0541	88.6287	104.19	106.573	96.9352	95.1327	128.608	107.732	126.928	120.093
YFR017C	YFR017C	88.1114	126.01	136.278	247.496	119.161	86.5654	140.443	180.784	141.703	110.608
YFR018C	YFR018C	80.0083	66.436	122.524	94.9659	84.1292	108.428	94.2796	88.2725	95.8122	105.3
YFR019W	FAB1	101.186	87.8028	103.208	103.044	136.373	96.5779	129.458	113.97	125.689	145.935
YFR021W	ATG18	144.273	172.627	255.961	180.438	130.522	173.61	147.552	164.983	173.372	123.83
YFR022W	ROG3	105	116.69	175.221	144.32	105.436	119.302	124.088	136.807	129.931	121.948
YFR023W	PES4	43.9703	45.2515	54.5788	48.7869	151.63	50.2643	77.7166	60.5598	59.4662	92.1814
YFR024C-A	LSB3	127.359	118.847	137.213	187.105	125.088	207.357	148.165	148.911	136.754	138.752
YFR025C	HIS2	129.177	204.887	256.261	247.268	209.961	313.326	185.059	245.631	251.052	207.973
YFR026C	YFR026C	80.3731	73.5192	81.2354	72.0801	110.068	154.91	92.6348	111.453	98.9794	84.4373
YFR027W	ECO1	85.0592	66.8163	84.5925	115.429	109.657	74.7829	117.728	74.5608	81.693	97.5838
YFR028C	CDC14	168.607	122.813	137.141	139.256	141.535	157.091	146.509	128.098	155.742	140.164
YFR029W	PTR3	96.2337	97.1878	105.024	137.497	141.805	145.289	154.488	138.909	154.975	167.567
YFR030W	MET10	122.561	259.938	203.711	200.305	335.383	389.394	226.195	334.014	270.654	217.193
YFR031C	SMC2	112.157	98.6711	95.013	96.8877	134.487	120.034	121.566	121.245	120.644	148.833
YFR031C-A	RPL2A	715.588	621.219	502.027	603.154	436.297	400.471	384.147	539.174	451.319	348.23
YFR032C	YFR032C	103.004	99.4377	112.87	108.868	106.337	49.4708	118.906	111.212	84.2485	86.4196
YFR032C-A	RPL29	1140.17	1044.86	706.128	784.973	569.143	587.132	585.831	815.632	474.302	556.728
YFR032C-B	YFR032C-B	874.221	690.244	471.729	444.96	400.254	374.583	314.169	570.693	346.145	240.946
YFR033C	QCR6	391.491	345.942	418.984	513.559	236.29	380.887	324.962	345.844	216.426	473.072
YFR034C	PHO4	298.454	195.193	231.464	510.051	181.39	376.046	167.058	212.702	187.558	218.008
YFR035C	YFR035C	206.349	111.215	106.45	196.314	123.476	171.184	208.667	107.929	224.186	141.9
YFR036W	CDC26	167.296	179.221	210.083	276.652	120.996	151.892	126.889	131.852	174.209	130.755
YFR037C	RSC8	170.176	136.646	154.773	202.031	162.935	140.738	160.426	142.299	168.199	212.826
YFR038W	IRC5	97.0059	84.5044	89.9263	92.914	103.849	115.274	126.169	91.7662	110.329	85.604
YFR039C	YFR039C	108.982	119.47	163.002	136.564	130.762	167.376	190.807	140.132	152.018	157.26
YFR040W	SAP155	186.859	171.67	145.202	157.425	164.452	153.229	187.706	169.725	182.842	169.206
YFR041C	ERJ5	134.367	132.043	115.137	114.035	120.046	99.9822	141.038	129.641	121.497	136.578
YFR042W	YFR042W	114.497	135.352	118.061	127.362	165.191	77.041	216.258	134.737	109.464	171.94
YFR043C	IRC6	137.627	187.823	149.422	162.706	134.018	144.673	162.95	184.582	205.385	111.796
YFR044C	YFR044C	117.206	275.426	257.16	275.113	206.238	212.619	212.734	265.439	247.678	205.88
YFR045W	YFR045W	104.648	313.123	259.842	230.674	212.714	243.061	190.912	302.256	206.757	196.973
YFR046C	CNN1	104.873	259.375	190.493	178.322	175.167	205.017	182.575	254.331	159.452	102.639
YFR047C	BNA6	113.379	152.802	161.905	153.528	106.429	132.338	108.498	224.188	127.081	109.355
YFR048W	RMD8	110.847	131.197	138.076	124.682	177.238	129.38	152.567	134.875	117.523	128.173
YFR049W	YMR31	195.086	246.454	331.585	256.583	244.349	234.619	254.359	234.334	216.599	221.087
YFR050C	PRE4	257.074	199.019	194.063	194.508	172.951	241.018	218.918	257.997	247.156	270.524
YFR051C	RET2	201.605	240.53	233.932	298.986	180.414	211.424	234.044	236.445	211.931	236.859
YFR052W	RPN12	272.312	243.491	207.257	182.129	184.618	215.909	228.823	211.026	213.449	245.738
YFR053C	HXK1	330.478	368.974	363.312	222.911	194.637	161.19	394.905	176.532	137.824	163.924
YFR055W	IRC7	138.265	273.647	281.449	161.641	209.728	205.66	145.602	174.804	143.152	184.731
YFR057W	YFR057W	26.2527	27.9259	23.04	33.0963	44.9212	31.4116	53.8406	56.7273	49.9226	32.381
YGL001C	ERG26	134.671	121.587	186.641	177.834	118.424	144.882	197.053	173.069	153.786	139.067
YGL002W	ERP6	151.637	137.575	136.281	144.174	97.1187	144.683	157.155	133.577	160.479	193.462
YGL003C	CDH1	141.026	107.75	149.056	153.116	115.765	141.205	164.949	143.441	157.043	217.891
YGL004C	RPN14	115.81	114.077	110.281	134.744	95.6944	141.203	144.386	125.89	130.926	141.917
YGL005C	COG7	129.212	133.368	143.629	120.463	123.11	103.968	140.977	137.476	153.463	90.5485
YGL006W	PMC1	130.916	160.025	273.265	176.366	167.607	108.826	182.019	149.97	185.148	165.157
YGL008C	PMA1	3561.08	1479.83	2292.9	2392.48	1835.4	2050.19	2653.58	1393.79	1395.3	2040.64
YGL009C	LEU1	287.037	115.886	140.217	389.149	195.183	1364.31	228.869	239.719	340.67	672.89
YGL010W	YGL010W	267.738	214.532	193.746	293.216	248.792	688.999	286.77	244.125	325.252	357.729
YGL011C	SCL1	315.149	229.427	248.875	275.627	200.999	278.082	231.865	352.566	252.176	199.027
YGL012W	ERG4	263.216	221.284	212.888	275.144	279.782	260.196	195.619	306.669	235.458	179.242
YGL013C	PDR1	134.374	88.15	114.404	101.953	129.041	119.13	116.744	136.997	118.595	111.821
YGL014W	PUF4	189.004	188.005	167.392	189.719	187.28	239.139	203.659	208.712	234.828	174.305
YGL015C	YGL015C	79.3163	63.6561	51.1543	52.8083	88.3817	51.1383	131.163	68.7786	93.9131	73.5676
YGL016W	KAP122	105.913	88.1756	81.2719	81.2923	125.672	85.2378	121.279	95.3724	105.369	109.33
YGL017W	ATE1	94.8647	100.314	124.226	118.892	88.0083	94.2668	137.767	105.166	120.511	86.0749
YGL018C	JAC1	120.446	147.566	158.125	147.226	137.708	117.031	164.21	133.868	123.357	81.6742
YGL019W	CKB1	171.86	179.202	236.498	210.346	146.265	196.494	161.426	216.05	216.08	151.818
YGL020C	GET1	196.501	161.434	200.343	130.923	141.762	159.699	175.597	162.941	148.756	166.345
YGL021W	ALK1	200.551	139.801	159.305	118.149	151.935	191.293	156.968	181.776	151.027	130.367
YGL022W	STT3	204.786	160.816	224.31	238.575	181.812	230.149	190.231	189.454	182.019	232.288
YGL023C	PIB2	103.775	120.484	168.957	198.407	130.61	158.677	172.165	177.509	154.02	139.492
YGL025C	PGD1	132.692	380.989	355.421	504.622	309.177	633.314	213.596	449.285	244.867	283.009
YGL026C	TRP5	162.045	557.614	461.097	635.767	501.98	583.136	468.438	742.591	573.903	418.805
YGL027C	CWH41	112.986	137.414	147.388	149.772	177.823	157.958	150.978	180.569	168.295	129.077
YGL028C	SCW11	603.423	818.497	680.56	328.81	565.135	199.916	482.205	588.724	365.53	240.678
YGL029W	CGR1	213.136	172.682	144.62	156.662	108.928	142.673	211.702	184.209	159.799	118.586
YGL030W	RPL30	1292.09	1037.95	647.734	693.416	650.289	587.227	471.024	686.858	564.012	532.335
YGL031C	RPL24A	824.561	1145.03	499.665	512.855	479.708	465.285	291.158	729.312	416.123	295.139
YGL032C	AGA2	346.728	1636.44	323.447	167.446	240.802	197.061	242.08	253.996	150.35	317.446
YGL033W	HOP2	98.6627	447.995	87.729	54.2007	93.3174	58.9709	124.609	152.574	71.4535	76.6901
YGL035C	MIG1	179.668	141.974	151.205	138.551	119.775	114.632	112.259	128.501	115.776	144.705
YGL036W	YGL036W	133.118	175.914	127.612	172.612	137.239	126.103	155.784	174.048	172.244	217.571
YGL037C	PNC1	663.392	1083.37	869.611	861.188	480.216	324.501	455.942	603.795	302.622	221.107
YGL038C	OCH1	324.47	260.979	278.685	223.516	163.938	144.812	168.081	184.296	159.478	148.588
YGL039W	YGL039W	154.024	152.762	161.014	156.022	142.994	115.611	151.482	172.771	193.468	142.956
YGL040C	HEM2	202.094	176.161	201.291	228.638	224.809	197.859	167.695	220.764	155.141	242.513
YGL041C-B	YGL041C-B	234.649	223.98	203.105	178.239	192.758	323.972	312.429	215.19	183.667	278.713
YGL043W	DST1	153.985	141.6	162.901	188.445	323.628	186.51	154.897	182.241	166.828	174.083
YGL044C	RNA15	121.365	138.894	165.534	160.621	119.24	173.09	135.094	171.44	135.836	136.412
YGL045W	RIM8	99.0027	154.624	179.81	184.753	136.794	186.246	127.083	156.035	190.989	170.379
YGL047W	ALG13	248.984	231.187	179.77	210.378	318.518	193.766	231.404	202.869	288.931	417.864
YGL048C	RPT6	186.223	128.837	125.305	159.065	160.704	168.659	158.055	168.158	137.113	140.056
YGL049C	TIF4632	115.388	125.81	115.18	132.568	146.374	102.827	116.479	129.971	151.693	105.658
YGL050W	TYW3	179.625	182.792	192.794	192.436	174.646	163.86	219.716	191.819	257.349	200.246
YGL051W	MST27	130.888	130.714	139.539	173.221	100.603	143.411	165.186	132.211	136.552	137.331
YGL053W	PRM8	178.763	262.016	188.4	206.406	200.913	160.722	181.565	195.203	191.675	123.852
YGL054C	ERV14	325.154	271.083	214.438	253.298	226.851	187.532	221.663	293.071	239.369	169.617
YGL055W	OLE1	279.255	151.014	244.202	580.995	330.736	410.043	291.146	187.327	275.694	204.917
YGL056C	SDS23	197.196	193.177	173.703	342.388	238.578	315.683	185.93	248.421	278.701	224.898
YGL057C	YGL057C	156.132	162.844	129.182	146.527	195.225	155.257	189.404	180.126	161.233	149.377
YGL058W	RAD6	187.208	323.68	305.035	341.383	322.252	262.314	243.642	306.812	302.382	161.534
YGL059W	YGL059W	131.583	483.51	250.555	347.911	359.825	450.572	316.629	493.04	354.729	265.804
YGL060W	YBP2	105.658	183.974	140.478	158.253	151.606	176.568	182.241	216.533	166.556	157.267
YGL061C	DUO1	100.576	120.749	198.834	126.102	134.756	124.912	141.885	107.934	176.221	105.644
YGL062W	PYC1	153.649	278.402	913.33	608.676	287.518	680.832	319.705	429.127	248.105	345.338
YGL063W	PUS2	122.808	73.2174	102.791	167.256	156.959	155.143	96.1686	90.0121	149.127	180.332
YGL064C	MRH4	107.546	94.0406	88.367	96.3233	107.167	88.5594	130.566	131.361	150.788	86.8849
YGL065C	ALG2	141.637	163.224	151.418	126.635	221.702	192.53	185.53	197.086	184.261	139.172
YGL066W	SGF73	130.003	193.847	182.708	196.609	298.103	228.114	189.923	248.939	262.412	209.19
YGL067W	NPY1	148.18	147.155	141.614	142.253	138.521	149.178	138.902	159.705	224.546	132.955
YGL068W	MNP1	219.114	171.586	202.707	242.962	236.399	148.625	204.939	175.708	194.531	164.88
YGL070C	RPB9	224.536	178.851	178.45	227.977	183.139	192.426	168.862	154.11	159.106	186.02
YGL071W	AFT1	171.053	167.921	203.941	234.397	198.953	278.2	169.461	177.06	254.957	164.295
YGL073W	HSF1	201.873	167.84	192.041	197.218	213.331	250.851	188.304	190.124	205.754	222.19
YGL075C	MPS2	122.821	106.38	91.3346	126.77	104.023	94.3628	91.7684	114.606	86.5718	75.5045
YGL076C	RPL7A	929.91	789.855	533.402	537.016	512.979	503.478	401.014	553.444	490.815	542.35
YGL077C	HNM1	350.15	141.506	151.297	180.311	225.907	181.166	154.998	137.296	181.492	179.114
YGL078C	DBP3	213.964	117.065	101.285	121.969	160.986	128.581	109.94	108.95	110.803	130.386
YGL079W	YGL079W	159.402	110.017	113.804	112.548	137.095	94.5104	124.808	81.3792	115.945	164.685
YGL080W	FMP37	174.143	159.382	133.743	167.611	188.964	127.556	255.294	180.403	175.683	241.6
YGL081W	YGL081W	59.979	70.5167	63.452	94.9156	77.4131	59.9893	64.0532	70.8229	60.4412	52.3839
YGL082W	YGL082W	131.377	159.231	136.664	163.132	122.917	127.621	152.007	172.756	133.713	160.553
YGL083W	SCY1	193.93	179.447	167.405	150.873	147.967	135.111	173.729	196.644	175.722	143.461
YGL084C	GUP1	127.228	129.654	128.843	125.472	129.598	156.154	157.716	137.224	131.208	124.971
YGL085W	YGL085W	121.482	148.081	134.183	115.058	95.0129	119.717	147.975	137.695	108.333	114.522
YGL086W	MAD1	126.775	109.387	92.6897	99.2446	118.894	94.3054	123.781	99.6753	106.246	116.835
YGL087C	MMS2	573.515	462.857	446.735	497.055	441.042	445.749	526.634	496.772	520.382	384.616
YGL089C	MF(ALPHA)2	95.4592	76.2314	93.84	102.153	94.8196	91.607	156.421	94.9493	92.1681	97.5004
YGL090W	LIF1	88.6381	94.4486	94.6845	89.7555	96.6836	111.791	128.952	106.104	124.635	84.4786
YGL091C	NBP35	128.323	126.42	152.722	138.703	117.914	196.164	162.132	132.897	148.817	115.273
YGL092W	NUP145	167.67	119.284	122.796	119.275	131.67	131.69	135.766	142.032	146.86	131.172
YGL093W	SPC105	106.67	78.3578	90.9533	99.4472	122.131	83.9017	112.413	90.2015	94.9765	84.8919
YGL094C	PAN2	122.222	84.0836	92.467	89.1663	109.943	94.467	123.746	102.695	104.55	87.9151
YGL095C	VPS45	109.804	129.919	116.892	120.779	129.611	135.281	193.499	145.437	146.533	185.699
YGL096W	TOS8	164.347	242.664	138.252	121.832	120.877	115.048	163.619	150.054	137.155	201.551
YGL097W	SRM1	177.735	127.492	136.652	166.496	160.668	165.225	203.269	147.216	180.148	151.36
YGL098W	USE1	137.435	152.805	135.849	150.449	112.949	141.173	160.093	141.974	113.063	129.662
YGL099W	LSG1	118.413	79.5324	73.9291	81.8893	110.498	97.6071	113.058	94.9733	121.426	87.9205
YGL100W	SEH1	126.952	134.712	175.183	133.907	106.112	100.115	121.062	164.728	153.304	109.701
YGL101W	YGL101W	361.715	395.629	342.65	243.095	303.31	217.145	244.75	363.348	256.751	193.98
YGL103W	RPL28	2043.35	1846.39	1181.96	1130.99	1075.26	908.418	774.064	1252.14	1001.89	741.512
YGL104C	VPS73	94.8317	164.798	157.618	136.715	103.972	91.2794	121.851	168.688	137.293	99.3053
YGL105W	ARC1	277.225	255.601	220.448	251.154	216.927	241.435	218.17	234.884	197.163	223.303
YGL106W	MLC1	257.433	285.307	279.96	281.327	169.679	158.202	176.107	297.512	189.185	136.323
YGL107C	RMD9	159.188	147.751	131.296	147.137	154.451	149.687	158.805	166.22	175.213	135.779
YGL108C	YGL108C	225.23	235.309	232.675	192.207	182.008	197.67	219.867	254.564	141.463	214.919
YGL110C	CUE3	134.304	140.228	152.57	123.875	192.062	120.923	149.085	137.267	143.356	125.584
YGL111W	NSA1	122.121	69.8348	77.5219	90.1532	145.707	93.3508	116.131	99.0309	126.938	122.04
YGL112C	TAF6	126.545	101.904	104.091	105.242	130.423	136.69	133.828	114.562	159.652	174.041
YGL113W	SLD3	87.5881	76.2801	87.8185	83.8724	86.7416	105.672	98.4584	101.648	95.5626	68.0965
YGL114W	YGL114W	97.5032	174.345	162.192	173.894	194.348	220.444	179.559	211.814	197.252	218.117
YGL115W	SNF4	192.143	184.893	194.357	196.264	291.698	214.687	200.356	198.538	207.268	192.615
YGL116W	CDC20	136.844	198.952	193.656	135.074	203.28	127.308	152.008	239.773	135.357	151.274
YGL117W	YGL117W	242.093	1545.92	1180.45	487.989	846.89	553.898	676.474	1128.97	725.496	376.485
YGL119W	ABC1	88.2811	93.5735	85.3357	81.3875	96.5711	70.3585	109.095	82.5074	103.734	112.338
YGL120C	PRP43	141.676	68.035	60.5395	79.3291	112.858	73.7875	106.014	67.1304	91.4785	104.519
YGL121C	GPG1	278.905	284.51	206.885	249.321	200.797	215.346	289.918	217.385	220.605	243.783
YGL122C	NAB2	318.425	231.879	217.638	303.628	178.764	264.99	233.229	243.044	305.811	283.373
YGL123W	RPS2	1105.03	916.804	713.136	871.742	591.089	618.885	493.487	773.673	660.726	572.39
YGL124C	MON1	98.6992	195.885	151.251	212.181	207.773	221.502	180.798	241.507	216.638	185.803
YGL125W	MET13	193.251	779.713	553.647	1398.52	1029.98	1419.65	750.044	1260.88	1226.68	786.512
YGL126W	SCS3	138.975	149.486	233.534	260.996	139.898	135.945	135.953	174.864	213.161	150.139
YGL127C	SOH1	175.838	162.75	215.612	219.8	195.033	143.824	195.79	186.539	190.953	143.791
YGL128C	CWC23	133.625	130.518	136.171	134.974	152.287	122.614	172.166	134.428	125.618	100.848
YGL129C	RSM23	135.467	149.893	119.926	119.536	193.439	129.992	128.457	152.455	118.3	160.781
YGL130W	CEG1	109.369	126.732	134.433	118.278	125.575	114.689	162.599	131.925	142.976	93.8706
YGL131C	SNT2	100.069	114.825	109.333	98.9709	137.878	116.873	135.832	122.147	129.027	123.519
YGL133W	ITC1	169.313	203.637	168.377	161.033	176.412	150.456	159.362	167.04	167.62	200.612
YGL134W	PCL10	201.464	197.263	149.037	166.76	177.95	184.365	153.475	206.108	218.603	218.76
YGL135W	RPL1B	1056.46	1018.81	751.773	745.726	726.266	520.101	502.984	896.75	611.433	445.051
YGL136C	MRM2	215.569	215.145	187.416	207.114	166.725	178.061	200.778	201.62	147.826	205.006
YGL137W	SEC27	211.831	199.341	187.562	228.075	199.452	202.139	184.347	224.116	255.815	216.842
YGL138C	YGL138C	42.9313	53.6209	43.2182	42.2799	60.9574	38.5508	56.4874	58.1503	66.199	159.019
YGL139W	FLC3	98.843	82.2147	98.0214	102.656	130.564	96.3853	153.532	98.5256	115.226	103.524
YGL140C	YGL140C	112.724	122.695	128.296	137.337	154.048	122.827	166.014	134.533	154.408	149.769
YGL141W	HUL5	104.756	148.617	132.861	122.399	157.737	143.176	152.886	147.856	143.919	138.841
YGL142C	GPI10	93.2957	122.977	102.235	100.573	126.84	98.3869	136.9	117.133	115.402	124.718
YGL143C	MRF1	96.8229	114.797	131.327	120.211	111.107	99.3234	110.789	141.309	138.062	122.598
YGL144C	ROG1	96.2053	126.113	124.157	109.597	154.713	139.142	130.408	137.869	145.154	91.1454
YGL145W	TIP20	113.638	109.25	119.535	90.62	111.323	113.988	149.643	129.603	117.884	145.709
YGL146C	YGL146C	186.18	161.104	131.763	173.826	132.106	140.558	126.933	171.291	127.508	130.177
YGL147C	RPL9A	847.529	568.973	372.51	527.494	536.492	390.892	294.354	471.661	373.471	305.393
YGL148W	ARO2	207.784	357.434	347.258	519.524	360.797	465.937	312.429	456.208	380.867	282.509
YGL150C	INO80	124.589	132.591	135.039	153.604	144.185	164.47	149.861	151.82	147.467	123.574
YGL151W	NUT1	131.62	145.912	124.551	115.209	165.48	129.345	136.514	140.186	130.374	152.599
YGL153W	PEX14	114.991	172.868	135.226	147.769	164.235	180.957	138.302	206.758	158.986	109.787
YGL154C	LYS5	170.662	249.347	193.096	218.481	214.069	289.708	160.482	260.153	259.278	234.273
YGL155W	CDC43	118.372	131.891	132.473	127.753	158.028	130.997	142.454	164.856	160.153	224.202
YGL156W	AMS1	135.208	167.11	174.249	179.268	160.197	135.427	164.255	179.548	145.467	153.056
YGL157W	YGL157W	158.604	165.143	136.419	135.127	141.753	86.6258	122.681	176.23	140.437	121.242
YGL158W	RCK1	37.0367	40.9583	40.369	54.3394	63.2393	39.1216	78.3833	55.5028	73.2843	74.5539
YGL159W	YGL159W	109.93	100.38	82.602	92.9195	121.472	108.888	126.08	105.174	107.549	110.176
YGL160W	YGL160W	90.763	108.916	89.3662	110.86	109.903	100.491	115.446	115.24	150.96	108.575
YGL161C	YIP5	158.783	207.908	190.839	218.674	137.765	190.772	183.452	202.707	199.656	165.039
YGL162W	SUT1	193.531	311.055	179.851	246.269	160.02	227.013	190.566	254.37	165.758	160.843
YGL163C	RAD54	101.558	81.7373	83.135	101.785	108.288	151.041	120.162	127.468	118.021	109.264
YGL164C	YRB30	107.94	123.963	163.657	146.735	94.003	110.641	154.117	95.3711	162.776	124.696
YGL166W	CUP2	111.336	137.104	183.663	270.306	147.145	180.99	143.72	119.493	132.373	147.256
YGL167C	PMR1	212.85	216.868	228.592	261.486	254.581	233.878	236.814	213.732	273.698	273.824
YGL168W	HUR1	317.246	267.42	306.562	265.378	317.915	315.748	267.816	226.628	295.302	399.772
YGL169W	SUA5	98.5943	87.8498	115.836	108.694	120.877	91.2592	126.573	90.0436	115.823	129.692
YGL170C	SPO74	54.0803	49.0025	40.206	43.3635	109.855	39.6731	56.1596	61.5003	67.1953	77.1694
YGL171W	ROK1	101.598	52.0063	51.0106	67.6121	98.9344	90.6195	79.6169	72.5565	84.7056	76.3832
YGL172W	NUP49	154.621	120.182	159.432	164.388	132.855	149.501	148.858	139.826	129.951	141.837
YGL173C	KEM1	221.163	160.622	164.515	166.102	169.922	194.541	201.725	176.265	179.187	218.232
YGL174W	BUD13	174.195	137.317	134.133	152.243	133.703	139.629	192.754	161.416	196.233	117.76
YGL175C	SAE2	125.896	104.989	146.204	88.5267	103.218	100.609	98.5467	105.439	69.4048	78.869
YGL176C	YGL176C	124.347	97.7459	105.766	85.68	117.351	99.1768	125.483	92.3689	94.1859	84.6424
YGL178W	MPT5	191.59	223.88	197.883	163.329	173.661	201.926	174.844	185.921	182.41	181.464
YGL179C	TOS3	123.098	142.594	138.171	156.301	126.896	111.647	155.784	149.84	136.69	133.045
YGL180W	ATG1	76.3783	338.209	209.209	215.415	300.624	323.734	230.233	368.274	190.952	137.26
YGL181W	GTS1	121.011	369.962	308.985	319.582	291.657	425.478	239.927	453.038	283.472	179.805
YGL183C	MND1	41.3065	325.675	57.7405	92.4084	91.7132	114.399	108.285	228.286	93.0734	64.7396
YGL184C	STR3	65.2262	853.68	180.59	371.168	363.909	466.849	221.336	639.27	286.713	186.008
YGL185C	YGL185C	129.595	374.452	212.268	183.729	201.423	279.687	164.444	279.494	177.738	213.448
YGL186C	TPN1	138.114	266.478	192.611	177.022	182.524	265.199	150.101	246.009	181.937	163.324
YGL187C	COX4	207.913	216.688	188.288	177.63	153.885	188.188	202.884	183.862	174.84	181.913
YGL189C	RPS26A	1202.6	1178.45	754.282	837.933	642.523	666.463	517.778	857.503	541.503	478.118
YGL190C	CDC55	257.936	261.075	200.49	224.72	264.626	159.804	197.361	235.883	210.909	236.029
YGL191W	COX13	217.842	225.087	179.371	216.726	160.109	171.923	173.758	150.306	300.191	200.82
YGL192W	IME4	199.678	175.789	163.09	192.875	157.404	195.25	185.923	203.774	183.788	199.469
YGL194C	HOS2	199.335	220.298	177.912	165.813	153.575	204.376	167.524	186.143	200.454	170.153
YGL194C-A	YGL194C-A	234.486	253.918	172.706	151.79	194.378	210.401	187.881	209.063	164.518	140.761
YGL195W	GCN1	175.943	150.566	131.476	152.453	165.811	137.676	151.379	157.005	171.373	180.479
YGL196W	YGL196W	225.974	228.682	216.637	194.94	236.08	142.497	229.545	238.207	204.848	178.454
YGL197W	MDS3	144.944	167.536	159.584	187.249	164.23	120.248	168.374	185.151	179.006	142.342
YGL198W	YIP4	291.488	303.449	350.038	369.688	138.71	237.901	164.983	237.299	257.838	151.852
YGL200C	EMP24	234.187	188.083	185.319	253.926	149.1	220.456	184.765	176.349	168.397	160.571
YGL201C	MCM6	118.65	107.385	119.291	115.035	118.955	147.344	143.869	125.262	133.879	162.057
YGL202W	ARO8	177.104	529.416	393.636	471.011	377.496	482.168	375.22	566.36	424.232	424.297
YGL203C	KEX1	113.396	108.237	109.333	121.679	123.941	95.259	131.791	122.124	128.393	148.955
YGL205W	POX1	71.6768	85.6891	92.7556	76.4729	111.18	92.6792	125.8	102.521	119.212	105.853
YGL206C	CHC1	220.012	236.526	196.891	232.581	173.606	185.515	193.95	233.117	194.305	185.342
YGL207W	SPT16	210.545	142.359	127.845	141.597	163.27	162.562	173.067	176.205	174.23	202.694
YGL208W	SIP2	123.548	111.905	149.928	163.54	155.885	89.6377	134.675	123.303	88.604	106.838
YGL209W	MIG2	405.654	347.93	384.729	459.529	340.827	247.416	491.337	331.825	333.541	307.918
YGL210W	YPT32	328.168	213.319	211.04	245.801	164.387	180.032	230.018	206.797	221.021	162.753
YGL211W	NCS6	171.852	115.701	142.637	142.414	146.864	183.824	139.813	125.937	167.691	120.469
YGL212W	VAM7	106.882	95.5574	101.325	124.673	86.4595	115.67	120.016	101.732	105.516	123.754
YGL213C	SKI8	124.033	140.324	143.481	123.306	134.38	125.993	140.386	146.977	149.725	100.37
YGL215W	CLG1	247.449	304.734	257.536	266.077	193.43	310.199	259.771	342.506	282.223	234.518
YGL216W	KIP3	131.631	86.2528	109.963	110.878	96.9524	110.375	133.876	86.6029	117.819	129.603
YGL219C	MDM34	154.844	247.434	176.486	243.609	161.013	252.051	180.03	252.495	231.26	175.056
[truncated: 3,804 more rows]
