# Supplementary material for: Genome-wide cooperation by HAT Gcn5, remodeler SWI/SNF, and chaperone Ydj1 in promoter nucleosome eviction and transcriptional activation
Source: HighWire-hosted journal article supplement (doi:10.1101/gr.196337.115), 2015-11-24
Supplement: File_S5.xlsx [file File_S5.xlsx]

## Sheet: Sheet1
Table S5 EDI and TDI values for 70 exemplar genes with SEM
		Ptet-SNF2gcn5∆-EDI		Ptet-SNF2gcn5∆-TDI
Systematic name	Common name	Avg	SEM	Avg	SEM
YLR304C	ACO1	1.01655	0.148179	0.349412	0.40566
YBR145W	ADH5	0.650503	0.126491	0.452669	0.010072
YNR044W	AGA1	1.64639	0.0958269	1.1423	0.0285403
YGL032C	AGA2	1.8428	0.159378	1.15226	0.0114225
YOL058W	ARG1	0.0793258	0.0362222	-0.300778	0.0663223
YJL088W	ARG3	0.393477	0.152706	-0.34887	0.123174
YHR018C	ARG4	0.682362	0.0368969	0.461099	0.0156609
YER069W	ARG5,6	0.295762	0.102558	-0.459894	0.0283378
YMR062C	ARG7	0.231885	0.14932	0.25042	0.0287648
YDR127W	ARO1	0.365744	0.0856129	0.202415	0.0560788
YDR380W	ARO10	1.04748	0.047638	1.01286	0.0624647
YBR249C	ARO4	0.955628	0.0781361	0.207809	0.071708
YGL202W	ARO8	1.48411	0.161683	0.298554	0.0572591
YIL015W	BAR1	2.51157	0.339513	1.71554	0.0132854
YJR148W	BAT2	2.51025	0.41272	0.843944	0.0606129
YNR069C	BSC5	1.35342	0.265105	0.950485	0.0362025
YCR005C	CIT2	0.387757	0.283335	-1.32985	0.541238
YOR303W	CPA1	0.179089	0.0322848	-0.647713	0.0759941
YJR109C	CPA2	0.826343	0.113694	-0.0785858	0.0470881
YGR088W	CTT1	0.614527	0.286028	0.969223	0.052575
YOL052C-A	DDR2	1.3924	0.0136931	1.45159	0.0127324
YNL125C	ESBP6	0.845949	0.139077	0.512234	0.146149
YBR047W	FMP23	0.66653	0.0436293	0.606951	0.0985521
YDL198C	GGC1	0.541811	0.131406	0.613762	0.0187468
YLR258W	GSY2	0.657309	0.0179919	1.09022	0.109608
YER055C	HIS1	0.983082	0.169399	0.236101	0.0334303
YCL030C	HIS4	0.743815	0.0172552	0.603917	0.0239863
YIL116W	HIS5	0.837246	0.0447392	0.257851	0.0498537
YBR248C	HIS7	0.913075	0.047831	0.427455	0.0607017
YER052C	HOM3	1.09428	0.0700412	0.54182	0.0385555
YMR251W-A	HOR7	1.92212	0.318492	0.811667	0.0312816
YFL014W	HSP12	1.45295	0.0888858	1.40709	0.0086294
YPL250C	ICY2	0.30951	0.0507695	-0.231166	0.111956
YPL135W	ISU1	0.788531	0.0603069	0.36938	0.0630061
YNL104C	LEU4	0.156362	0.023614	-0.696317	0.0618179
YDL182W	LYS20	0.6944	0.140553	-0.857477	0.266209
YDL131W	LYS21	0.267728	0.0570919	-0.779521	0.287979
YOL119C	MCH4	0.823172	0.102093	0.572827	0.0202816
YOR221C	MCT1	0.628856	0.136514	0.232886	0.12091
YIL051C	MMF1	1.10313	0.0829395	1.43757	0.104867
YHR162W	MPC2	0.382995	0.112797	-0.272551	0.0400506
YNL036W	NCE103	1.32866	0.129435	0.582856	0.0830593
YDR043C	NRG1	3.21323	0.555329	1.06975	0.0513777
YOR130C	ORT1	0.529744	0.0157409	0.384832	0.0623258
YOL084W	PHM7	0.625382	0.114847	1.24758	0.0753234
YER053C	PIC2	1.222	0.133778	0.803471	0.0439388
YIL117C	PRM5	1.00433	0.0599338	0.478788	0.0805887
YBR218C	PYC2	1.87004	0.12016	0.109103	0.0865617
YGR161C	RTS3	-7.26171e-05	0.0629068	-3.98447	0.0701849
YDR379C-A	SDH6	1.15354	0.139628	0.429531	0.355391
YLR452C	SST2	2.3962	0.126357	1.45688	0.0414989
YFL026W	STE2	3.46719	0.407434	1.7424	0.013963
YGL184C	STR3	0.361356	0.104207	0.719088	0.0101743
YOR337W	TEA1	1.0192	0.192665	0.379395	0.112081
YER175C	TMT1	1.57521	0.203202	0.839875	0.0045651
YGL186C	TPN1	0.865792	0.169515	0.6586	0.080459
YLL028W	TPO1	2.7365	0.242856	1.49432	0.077413
YKL211C	TRP3	0.504845	0.108532	-0.161465	0.118169
YDR354W	TRP4	1.00749	0.177198	0.336371	0.0668484
YKL035W	UGP1	1.73744	0.265951	1.38784	0.0263682
YOR230W	WTM1	1.39461	0.0532171	1.10944	0.035484
YLL048C	YBT1	0.756393	0.278513	0.575233	0.0489942
YDL025C	YDL025C	0.752138	0.200292	0.677352	0.021329
YDR531W	YDR531W	1.06267	0.134019	0.0169116	0.206257
YGL117W	YGL117W	0.773361	0.0647721	0.629243	0.0277276
YHR022C	YHR022C	1.07049	0.104193	0.807439	0.0312331
YJR154W	YJR154W	0.628837	0.191309	-0.0850274	0.0370041
YPL264C	YPL264C	1.09387	0.144344	0.40899	0.0588414
YPR036W-A	YPR036W-A	0.26401	0.0896027	0.18735	0.115833
YLR120C	YPS1	1.3125	0.136878	0.826818	0.0664968

## Sheet: Sheet2
EDI and TDI values for 70 exemplar genes
Systematic name	Common name	ydj1∆_EDI	snf2∆_EDI	gcn5∆_EDI	snf2∆ydj1∆/lcGCN4_EDI	gcn5∆ydj1∆_EDI	Ptet-SNF2_EDI	Ptet-SNF2gcn5∆_EDI	Ptet-SNF2gcn5∆ydj1∆/lcGCN4_EDI	ydj1∆_TDI	snf2∆_TDI	gcn5∆_TDI	snf2∆ ydj1∆/lcGCN4_TDI	gcn5∆ ydj1∆_TDI	Ptet-SNF2_TDI	Ptet-SNF2gcn5∆_TDI	Ptet-SNF2gcn5∆ydj1∆/lcGCN4_TDI
YMR251W-A	HOR7	0.0223606	0.779425	0.30262	1.26424	0.227525	0.415055	1.92212	1.36408	0.0858027	0.466194	0.433275	0.832917	0.319459	0.566985	0.811667	0.95627
YNL104C	LEU4	0.0206626	0.359173	0.117535	0.483061	0.115265	-0.0124526	0.156362	0.23227	0.0168089	-0.74737	-0.420497	-0.578304	-0.454699	-0.588854	-0.696317	-0.578217
YPR036W-A	YPR036W-A	-0.180407	-0.0803727	0.145965	0.0437154	0.0931434	-0.155486	0.26401	0.341952	-0.0323573	-0.209877	0.310737	0.551026	0.289545	0.35	0.18735	0.293765
YPL250C	ICY2	-0.11553	0.0955793	0.211409	-0.0113433	0.0710753	-0.0112142	0.30951	0.451405	-0.374985	-0.740645	0.0797412	-0.0565654	-0.142213	-0.227007	-0.231166	-0.210064
YOL058W	ARG1	0.217711	0.0161244	0.0476656	0.295742	0.160422	-0.0555088	0.0793258	0.700095	0.393775	-0.540315	-0.391172	0.328427	-0.0334071	-0.164894	-0.300778	0.180423
YCL030C	HIS4	0.121786	0.731026	0.103513	0.540776	0.350962	0.0799205	0.743815	0.848591	0.359824	0.759489	0.0130258	0.660887	0.336443	0.10853	0.603917	0.747784
YBR145W	ADH5	0.119174	0.349114	0.532484	0.258327	0.612181	0.00843427	0.650503	0.676042	0.00767098	-0.051313	0.422598	-0.116935	0.553747	-0.229165	0.452669	0.709979
YOR130C	ORT1	0.195627	0.344572	0.329362	0.459796	0.600378	0.120104	0.529744	0.598002	0.313561	0.332334	0.551071	0.355912	0.502673	0.164053	0.384832	0.483542
YHR018C	ARG4	0.296095	0.265962	0.5447	0.34037	0.729768	0.0755064	0.682362	0.908266	0.3225	0.241232	0.328846	0.454868	0.584909	0.0466036	0.461099	0.667655
YOL119C	MCH4	0.0435158	0.46604	0.441803	0.690482	0.541696	0.153835	0.823172	0.799023	0.362417	0.497122	0.345545	0.404859	0.599913	-0.0625349	0.572827	0.771248
YDR380W	ARO10	0.30197	0.780307	0.599906	1.06234	0.741106	0.597934	1.04748	0.979021	0.922832	1.05548	0.840793	1.10557	0.927585	0.781469	1.01286	1.06506
YGL117W	YGL117W	0.184069	0.564073	0.604002	0.634658	0.699864	0.282801	0.773361	1.17483	0.280308	0.811404	0.536136	0.760853	0.666841	0.319785	0.629243	0.896925
YJL088W	ARG3	0.115326	0.281792	0.439728	0.596693	0.409246	-0.0374299	0.393477	0.585533	0.743712	0.0792905	-0.150723	0.598188	0.0840534	-0.0872949	-0.34887	0.304814
YGR161C	RTS3	-0.31091	-0.255084	-0.175774	-0.230955	-0.256117	-0.197367	-7.26171e-05	-0.206258	-2.72135	-7.01904	-1.6143	-3.74621	-3.39907	-1.72968	-3.98447	-3.78936
YER052C	HOM3	0.194848	0.509667	0.838769	0.718327	0.897202	0.359813	1.09428	1.26996	0.119123	0.467772	0.396024	0.537521	0.559768	0.253798	0.54182	0.646975
YIL051C	MMF1	0.371861	0.592725	0.872909	1.00806	1.0715	0.385398	1.10313	1.52816	0.951305	0.919105	1.24516	1.33875	1.41997	0.712193	1.43757	1.49714
YER069W	ARG5,6	-0.0228053	-0.0218343	0.367895	0.0645706	0.277426	-0.156448	0.295762	0.415627	0.655141	-0.206087	-0.465086	0.310267	0.0104456	-0.270622	-0.459894	0.12493
YHR022C	YHR022C	0.528593	0.703313	1.16637	0.951651	0.992746	0.409248	1.07049	0.930188	0.904102	0.850781	0.229635	1.21802	0.684453	0.705674	0.807439	1.05526
YDR127W	ARO1	-0.111847	0.0792575	0.263917	0.107756	0.367651	-0.214515	0.365744	0.141551	-0.0394084	-0.0935012	0.315322	0.0313991	0.23669	-0.31644	0.202415	0.283726
YDL182W	LYS20	-0.0416318	0.542019	-0.0149048	0.507419	0.164599	-0.0174645	0.6944	0.652066	-0.608833	-0.557078	-1.73651	-0.641017	-1.05089	-0.840345	-0.857477	-0.622622
YDL131W	LYS21	0.0131244	0.0447654	0.304134	0.259121	0.197645	-0.189682	0.267728	0.888054	-0.152238	-0.885142	-0.604286	-1.52123	-0.136405	-1.04632	-0.779521	-0.281309
YDR354W	TRP4	0.05052	0.448227	0.514878	0.400303	0.813075	0.155301	1.00749	1.32696	-0.212569	0.0889877	-0.0995791	-0.142194	0.327452	-0.0275981	0.336371	0.654964
YIL116W	HIS5	0.41834	0.677826	0.685372	0.526405	0.731431	0.117816	0.837246	0.848152	0.435024	0.303688	-0.01556	0.233507	0.265057	-0.0489669	0.257851	0.532913
YER055C	HIS1	0.324848	0.557767	0.42789	0.592822	0.683768	0.0972462	0.983082	1.54233	0.39709	6.6979e-05	0.291549	0.163619	0.400179	-0.18947	0.236101	0.674404
YOR303W	CPA1	0.176753	0.0892006	0.52223	0.52789	0.371449	0.145004	0.179089	1.032	0.349335	-0.448966	-0.614451	0.117624	-0.518903	-0.448186	-0.647713	-0.272583
YLR120C	YPS1	-0.0288762	0.622312	0.797249	0.797906	0.89421	0.400818	1.3125	1.32285	-1.27682	0.187224	0.873034	0.67145	0.571995	0.510951	0.826818	0.513805
YNL125C	ESBP6	0.402373	0.599412	0.767032	0.801509	0.649115	0.229959	0.845949	0.755942	0.617034	0.33241	0.200861	0.549565	0.567849	0.394182	0.512234	0.72724
YMR062C	ARG7	-0.0435995	0.00141074	0.107815	0.208909	0.205614	-0.237725	0.231885	0.342844	0.432675	0.396087	0.273544	0.488911	0.306731	0.0990696	0.25042	0.384374
YBR249C	ARO4	0.367163	0.637576	0.721901	0.655586	0.895069	0.104818	0.955628	1.02411	0.489569	0.0991661	0.33683	0.0558482	0.465581	-0.165463	0.207809	0.657693
YGL032C	AGA2	0.854001	1.43919	1.85731	1.8028	1.76982	1.02241	1.8428	2.31266	1.01805	1.13901	1.08213	1.11605	1.08114	1.0719	1.15226	1.0227
YHR162W	MPC2	-0.161967	-0.188062	0.369066	0.0612207	0.540045	-0.225976	0.382995	0.770251	0.0704568	-0.535725	-0.292986	0.292908	0.11376	-0.302075	-0.272551	0.188442
YCR005C	CIT2	-0.90333	0.408695	0.574005	0.606005	0.350911	-0.629063	0.387757	0.510633	-3.15612	-0.103264	-0.317925	0.47269	-0.693214	-1.05524	-1.32985	-1.07541
YPL264C	YPL264C	0.528116	0.628684	1.27305	0.516818	1.02372	0.0709703	1.09387	0.877821	0.325686	0.308999	0.328698	0.108947	0.658795	-0.329546	0.40899	0.863611
YOR337W	TEA1	0.262514	0.603356	0.972051	1.01181	1.24489	0.426686	1.0192	1.4814	-0.0275349	0.333065	0.30449	0.213407	0.630825	0.0121646	0.379395	0.618554
YKL211C	TRP3	-0.29952	0.00195848	0.511802	0.261375	0.540887	0.0106186	0.504845	0.429961	-0.137233	-0.164494	-0.0206961	-0.102807	0.225074	-0.397802	-0.161465	0.214162
YLR258W	GSY2	0.093643	0.239322	0.626281	0.885968	0.686177	0.16975	0.657309	0.618288	0.30942	0.736147	0.834032	1.37698	0.494379	0.695497	1.09022	1.25309
YBR248C	HIS7	0.217878	0.448043	0.862001	0.394362	0.977943	0.0156918	0.913075	1.33942	0.533708	0.372401	0.554181	0.186107	0.732058	-0.166441	0.427455	0.613148
YIL015W	BAR1	0.638653	1.34378	2.04118	1.83335	2.19966	0.940584	2.51157	2.67789	1.06777	1.59114	1.44377	1.67797	1.64304	1.24403	1.71554	1.71098
YGL184C	STR3	0.299007	0.206239	0.425913	0.275928	0.486586	0.0594118	0.361356	1.85976	0.853683	0.611972	0.621179	0.490619	0.802005	0.271937	0.719088	0.846811
YPL135W	ISU1	0.0581712	0.109014	0.452485	0.477502	0.301152	0.167184	0.788531	0.866324	0.0690088	-0.250734	0.314481	-0.0356233	-0.129207	-0.087387	0.36938	0.694695
YFL026W	STE2	1.24483	2.7302	1.97836	3.24811	3.25353	1.57044	3.46719	4.8887	1.31495	1.70825	1.38925	1.83103	1.74826	1.34555	1.7424	1.87782
YOL084W	PHM7	-0.0663338	-0.0660131	0.136175	0.459303	0.240706	0.211857	0.625382	0.367623	0.70016	0.666584	0.47829	1.34645	0.79318	1.16426	1.24758	1.20643
YJR109C	CPA2	0.061662	0.344762	1.01597	0.651196	0.575872	0.1449	0.826343	0.421725	0.237021	-0.0085378	0.00309766	0.274331	0.0859694	-0.0334629	-0.0785858	0.150279
YOR230W	WTM1	0.0236183	0.925822	1.30738	1.26849	1.14219	0.314301	1.39461	1.8353	0.00676191	0.49102	0.82059	0.931106	0.843151	-0.0392232	1.10944	1.32598
YDR379C-A	SDH6	0.223759	0.509585	1.02968	0.964738	1.04458	0.453207	1.15354	1.7373	0.509294	0.849434	0.623854	1.21836	0.641716	0.604399	0.429531	1.08277
YOR221C	MCT1	-0.0315887	0.211148	0.2533	0.360973	0.429268	-0.233523	0.628856	0.557117	0.505441	0.463606	0.376052	0.260945	0.51068	0.265863	0.232886	0.599986
YFL014W	HSP12	0.28629	0.535635	1.05582	1.27413	0.853767	0.694081	1.45295	1.50922	1.19819	1.20567	1.12663	1.51108	0.969874	1.35628	1.40709	1.48657
YER053C	PIC2	0.246876	0.484038	1.16837	0.792358	1.26496	0.43004	1.222	1.42618	0.597339	0.531116	0.779183	0.868431	0.760443	0.37408	0.803471	0.814529
YER175C	TMT1	0.640628	1.41834	1.6331	0.829924	1.4174	0.64795	1.57521	1.68402	0.576958	0.773327	0.715668	0.548277	0.876939	0.494016	0.839875	0.974567
YNR069C	BSC5	0.248465	0.94754	1.0379	0.301729	1.10389	0.325862	1.35342	0.797348	-0.0545313	0.765602	0.876385	0.00732666	0.748703	0.0919316	0.950485	0.57829
YDR043C	NRG1	0.701188	2.28926	1.36726	2.66596	1.06101	2.2761	3.21323	4.26245	0.527049	0.754387	0.461212	1.08014	0.738754	0.97918	1.06975	0.961894
YOL052C-A	DDR2	0.494488	1.36279	0.857053	1.78083	1.23769	1.39723	1.3924	1.98085	0.987474	1.15914	1.18033	1.3944	1.15177	1.43432	1.45159	1.43258
YNR044W	AGA1	1.20351	1.15787	1.76098	1.45771	1.44354	1.15213	1.64639	2.08813	0.998641	1.11262	0.999875	1.21687	1.12626	1.06844	1.1423	1.18452
YJR148W	BAT2	0.525003	1.12766	2.21763	1.37041	1.99556	0.724673	2.51025	1.64022	-0.405797	0.389723	0.473622	0.746066	0.795151	-0.0876724	0.843944	1.06972
YLR452C	SST2	1.01263	1.78586	2.24554	2.13772	2.10627	1.51109	2.3962	2.43209	1.18423	1.38643	1.24006	1.42292	1.37839	1.14455	1.45688	1.43277
YGL202W	ARO8	0.173066	0.669955	1.40466	0.650212	1.51004	0.267014	1.48411	1.47586	0.385396	0.165775	0.431208	0.134108	0.437669	-0.104863	0.298554	0.298368
YLL048C	YBT1	0.279293	0.654071	1.35478	0.93785	1.03898	0.345267	0.756393	1.48579	0.853386	0.59514	0.383168	0.34181	0.683437	0.178117	0.575233	0.573045
YNL036W	NCE103	0.0278675	0.351185	1.44747	0.400994	0.717425	0.262366	1.32866	1.30008	-0.0808175	-0.267461	0.283947	0.0831187	-0.836305	0.0951882	0.582856	0.769052
YIL117C	PRM5	0.224358	0.584228	1.30534	0.612339	1.53222	0.0705444	1.00433	1.57908	0.520934	0.180858	0.738811	0.423242	0.778872	0.119058	0.478788	0.530833
YGL186C	TPN1	0.276146	0.414881	1.03994	0.532898	0.779614	0.0570167	0.865792	1.53767	0.575453	0.696892	0.654033	0.00996888	0.906613	0.159463	0.6586	0.803602
YDL025C	YDL025C	0.062873	0.468602	0.579132	0.690715	0.583028	0.109877	0.752138	0.24904	0.545108	0.66118	0.514264	0.60402	0.735502	0.418997	0.677352	0.805716
YBR047W	FMP23	0.259283	0.646092	0.708275	0.51244	0.630807	0.193682	0.66653	0.37226	0.70987	0.681637	0.397923	0.443089	0.77508	0.227751	0.606951	0.873776
YGR088W	CTT1	-0.194646	0.0660585	0.121872	0.553053	-0.00776733	0.158522	0.614527	0.370931	0.744553	0.710491	0.0963093	1.13264	0.420668	1.01458	0.969223	1.22933
YBR218C	PYC2	0.683036	0.592144	1.57752	1.31885	1.63523	0.71361	1.87004	2.12831	0.300671	-0.205915	-0.283302	0.357064	0.283215	-0.0770829	0.109103	0.555276
YKL035W	UGP1	0.315362	0.717283	1.08169	1.62089	1.45914	0.832281	1.73744	1.38097	0.782955	0.723601	1.18722	1.44325	1.13243	1.08013	1.38784	1.49447
YLR304C	ACO1	-0.382065	0.277481	1.00287	1.12816	0.850864	0.0184029	1.01655	0.52434	-0.165777	0.302844	0.415923	1.05041	0.481252	0.344006	0.349412	0.319525
YDR531W	YDR531W	0.208902	0.271064	1.24867	0.479198	1.00194	0.384784	1.06267	0.806929	0.495731	0.42354	0.181684	-0.600562	0.27797	-0.537706	0.0169116	0.241492
YDL198C	GGC1	-0.061669	-0.0495822	-0.100491	-0.0763402	0.681682	-0.447974	0.541811	1.18457	0.648285	0.536611	0.551321	0.399259	0.758219	-0.0181472	0.613762	0.617998
YLL028W	TPO1	-0.0579135	1.92694	1.56399	1.68458	1.09767	1.48498	2.7365	2.8746	0.0294062	1.13	0.380337	1.29077	0.277557	1.15448	1.49432	1.32074
YJR154W	YJR154W	0.146474	0.384337	0.986893	0.399189	0.610709	0.333477	0.628837	0.637254	0.129379	0.340468	0.131507	-0.203146	0.153825	-0.27581	-0.0850274	0.520984
	Avg	0.19991	0.568012	0.813438	0.767027	0.824609	0.304088	1.02867	1.1822	0.286081	0.276444	0.348163	0.461879	0.441995	0.192402	0.432973	0.616578
	SD	0.341797	0.548981	0.574251	0.618797	0.585404	0.497759	0.709896	0.858693	0.715293	1.0348	0.578015	0.789548	0.689295	0.61221	0.821395	0.755516
	SEM	0.040836	0.0655891	0.0686083	0.0739304	0.0699408	0.0594694	0.0848143	0.102592	0.0854591	0.123632	0.069058	0.0943307	0.082353	0.0731433	0.0981356	0.0902648
		ydj1∆_EDI	snf2∆_EDI	gcn5∆_EDI	snf2∆ydj1∆/lcGCN4_EDI	gcn5∆ydj1∆_EDI	Ptet-SNF2_EDI	Ptet-SNF2gcn5∆_EDI	Ptet-SNF2gcn5∆ydj1∆/lcGCN4_EDI	ydj1∆_TDI	snf2∆_TDI	gcn5∆_TDI	snf2∆ ydj1∆/lcGCN4_TDI	gcn5∆ ydj1∆_TDI	Ptet-SNF2_TDI	Ptet-SNF2gcn5∆_TDI	Ptet-SNF2gcn5∆ydj1∆/lcGCN4_TDI
