# Supplementary material for: Genome-wide cooperation by HAT Gcn5, remodeler SWI/SNF, and chaperone Ydj1 in promoter nucleosome eviction and transcriptional activation
Source: HighWire-hosted journal article supplement (doi:10.1101/gr.196337.115), 2015-11-24
Supplement: File_S6.zip [file demo.docx]

# Step 1: Convert sam -> cpsOut -> znt4 files

cd sam_file/

[qiuh@helix test]$ cd sam_file

[qiuh@helix sam_file]$ ./script.init_sacCer2_32

[qiuh@helix sam_file]$ ln -s test.sam samLNS

[qiuh@helix sam_file]$ ./script.cps_all

[qiuh@helix sam_file]$ ./script.mark_cps32

# Step 2: Size-select the raw reads (e.g. 50-300bp, for ChIP-seq data). Create new znt4 files with the filtered reads

[qiuh@helix sam_file]$ perl Unique_cpsOut_to_znt4.pl 50 300 all > test_50-300.znt4_report.txt

# Step 3: Generate statistics of read counts (compute number of reads over coding regions, promoters, downstream regions, etc.)

[qiuh@helix sam_file]$ cd ..

[qiuh@helix test]$ perl minetreatmentfeats_mod.pl test_statistics test
